# Supplementary material for: ISWFoam: A numerical model for internal solitary wave simulation in continuously stratified fluids
Source: Copernicus journal article supplement (doi:10.5194/gmd-2021-102), 2021-05-27
Supplement: Supplementary file 1 [file gmd-2021-102-supplement.zip]

# ISWFOam

## 1 Overview

A numerical model, ISWFOam with a modified  $k-\omega$  SST model, established by combining the density transport equation with a fully three-dimensional (3D) Navier-Stokes equation, is developed to simulate ISWs in continuously stratified, incompressible, viscous fluids based on the open source code OpenFOAM-v1906.

ISWFOam provides two initial wave generation methods to generate an ISW in continuously stratified fluids, including solving the weakly nonlinear models of the extended Korteweg-de Vries (eKdV) equation and the fully nonlinear models of the Dureuil-Jacotin-Long (DJL) equation. We use the DJLES open source package provided by [Dunphy et al \(2011\)](#) to solve the DJL equations. Then we input the initial field calculated by DJLES into OpenFOAM to obtain the initial field required for OpenFOAM numerical simulation.

## 2 Installation of ISWFOam

ISWFOam is straightforward to install. ISWFOam is available at <https://github.com/Mr-trekking/ISW.git>, which can be downloaded freely. The downloaded code includes the main program (ISWFOam-master), the turbulence model (densityTurbulenceModels-master), pre-processing (setRhoFields, setUFields), post-processing (postSensDensity.py) and verification tutorial.

Before installing ISWFOam, you should ensure that you have successfully installed OpenFOAM-v1906, which installation can refer to <https://www.openfoam.com/releases/openfoam-v1906/>.

ISWFOam is installed by executing the **wmake** command in the ISWFOam-master, densityTurbulenceModels-master, setRhoFields and setUFields files, or directly executing the script prepared Allwmake through the **./Allwmake** command.

## 3 Running tutorials

### 3.1 FlatBottom-eKdV instructions

FlatBottom-eKdV is a tutorial for the propagation and evolution of ISWs generated by the eKdV equation along a flat bottom in continuously stratified fluid.

#### 3.1.1 wave generation

The method of initializing the field is selected to generate internal solitary waves

specified according to weakly-nonlinear models that is the eKdV equation, which includes cubic nonlinearity. The pre-processing ([setRhoFields](#), [setUFields](#)) program is used to generate internal solitary waves, by executing the **setRhoFields** and **setUFields** command, or directly executing the script prepared Allrun.pre through the **./Allrun.pre** command.

### 3.1.2 Parallel Computing

Perform single core calculation by command ISWFoam. The code has good parallel efficiency. It divides threads through **decomposePar** according to the file named decomposeParDict, and then executes parallel calculations through command:

**mpirun -np  $N$  ISWFoam -parallel &>log**

where  $N$  is the specified number of threads according to the file named decomposeParDict.

### 3.1.3 Post-processing (interface extraction)

In order to facilitate the application of the code, the post-processing script of the interface extraction has been provided, named **postSensDensity.py**. By executing the **./postSensDensity.py** command, the calculation data results in the *postProcessing* file are post-processed and stored in the *gaugesInterFace* file.

## 3.2 FlatBottom-DJLES instructions

FlatBottom-eKdV is a tutorial for the propagation and evolution of ISWs generated by the DJLES equation along a flat bottom in continuously stratified fluid.

### 3.1.1 wave generation

A fully nonlinear models of the DJL equation is selected to generate ISWs. We use the DJLES open source package provided by [Dunphy et al \(2011\)](#) to solve the DJL equations.

### 3.1.2 Parallel Computing

Perform single core calculation by command ISWFoam. The code has good parallel efficiency. It divides threads through **decomposePar** according to the file named decomposeParDict, and then executes parallel calculations through command:

**mpirun -np  $N$  ISWFoam -parallel &>log**

where  $N$  is the specified number of threads according to the file named decomposeParDict.

### 3.1.3 Post-processing (interface extraction)

In order to facilitate the application of the code, the post-processing script of the interface extraction has been provided, named **postSensDensity.py**. By executing the **./postSensDensity.py** command, the calculation data results in the *postProcessing* file are post-processed and stored in the *gaugesInterFace* file.

### Reference

Dunphy, M., Subich, C., Stastna, M., 2011. Spectral methods for internal waves: indistinguishable density profiles and double-humped solitary waves. *Nonlinear Processes in Geophysics*, 18(3), 351-358. <https://doi.org/10.5194/npg-18-351-2011>.
