# Supplementary material for: ISWFoam: A numerical model for internal solitary wave simulation in continuously stratified fluids
Source: Copernicus journal article supplement (doi:10.5194/gmd-2021-102), 2021-05-27
Supplement: Supplementary file 2 [file gmd-2021-102-supplement.zip]

Archive with 131 entries (104 files):
- ISWFoam/
- ISWFoam/Allwmake
- ISWFoam/densityTurbulenceModels-master/
- ISWFoam/densityTurbulenceModels-master/kOmegadensity/
- ISWFoam/densityTurbulenceModels-master/kOmegadensity/kOmegadensity.C
- ISWFoam/densityTurbulenceModels-master/kOmegadensity/kOmegadensity.H
- ISWFoam/densityTurbulenceModels-master/kOmegaSSTdensity/
- ISWFoam/densityTurbulenceModels-master/kOmegaSSTdensity/kOmegaSSTdensity.C
- ISWFoam/densityTurbulenceModels-master/kOmegaSSTdensity/kOmegaSSTdensity.H
- ISWFoam/densityTurbulenceModels-master/kOmegaSSTdensityBase/
- ISWFoam/densityTurbulenceModels-master/kOmegaSSTdensityBase/kOmegaSSTdensityBase.C
- ISWFoam/densityTurbulenceModels-master/kOmegaSSTdensityBase/kOmegaSSTdensityBase.H
- ISWFoam/densityTurbulenceModels-master/lnInclude/
- ISWFoam/densityTurbulenceModels-master/lnInclude/kOmegadensity.C
- ISWFoam/densityTurbulenceModels-master/lnInclude/kOmegadensity.H
- ISWFoam/densityTurbulenceModels-master/lnInclude/kOmegaSSTdensity.C
- ISWFoam/densityTurbulenceModels-master/lnInclude/kOmegaSSTdensity.H
- ISWFoam/densityTurbulenceModels-master/lnInclude/kOmegaSSTdensityBase.C
- ISWFoam/densityTurbulenceModels-master/lnInclude/kOmegaSSTdensityBase.H
- ISWFoam/densityTurbulenceModels-master/lnInclude/makeDensityTurbModel.C
- ISWFoam/densityTurbulenceModels-master/Make/
- ISWFoam/densityTurbulenceModels-master/Make/files
- ISWFoam/densityTurbulenceModels-master/Make/linux64GccDPInt32Opt/
- ISWFoam/densityTurbulenceModels-master/Make/linux64GccDPInt32Opt/makeDensityTurbModel.C.dep
- ISWFoam/densityTurbulenceModels-master/Make/linux64GccDPInt32Opt/makeDensityTurbModel.o
- ISWFoam/densityTurbulenceModels-master/Make/linux64GccDPInt32Opt/options
- ISWFoam/densityTurbulenceModels-master/Make/linux64GccDPInt32Opt/sourceFiles
- ISWFoam/densityTurbulenceModels-master/Make/linux64GccDPInt32Opt/variables
- ISWFoam/densityTurbulenceModels-master/Make/options
- ISWFoam/densityTurbulenceModels-master/makeDensityTurbModel.C
- ISWFoam/ISWFoam-master/
- ISWFoam/ISWFoam-master/createFields.H
- ISWFoam/ISWFoam-master/createthetaField.H
- ISWFoam/ISWFoam-master/ISWFoam.C
- ISWFoam/ISWFoam-master/Make/
- ISWFoam/ISWFoam-master/Make/files
- ISWFoam/ISWFoam-master/Make/linux64GccDPInt32Opt/
- ISWFoam/ISWFoam-master/Make/linux64GccDPInt32Opt/ISWFoam.C.dep
- ISWFoam/ISWFoam-master/Make/linux64GccDPInt32Opt/ISWFoam.o
- ISWFoam/ISWFoam-master/Make/linux64GccDPInt32Opt/options
- ISWFoam/ISWFoam-master/Make/linux64GccDPInt32Opt/sourceFiles
- ISWFoam/ISWFoam-master/Make/linux64GccDPInt32Opt/variables
- ISWFoam/ISWFoam-master/Make/options
- ISWFoam/ISWFoam-master/pEqn.H
- ISWFoam/ISWFoam-master/readTransportProperties.H
- ISWFoam/ISWFoam-master/rhoEqn.H
- ISWFoam/ISWFoam-master/UEqn.H
- ISWFoam/manual-ISWFoam.pdf
- ISWFoam/setRhoFields/
- ISWFoam/setRhoFields/Make/
- ISWFoam/setRhoFields/Make/files
- ISWFoam/setRhoFields/Make/linux64GccDPInt32Opt/
- ISWFoam/setRhoFields/Make/linux64GccDPInt32Opt/options
- ISWFoam/setRhoFields/Make/linux64GccDPInt32Opt/setRhoFields.C.dep
- ISWFoam/setRhoFields/Make/linux64GccDPInt32Opt/setRhoFields.o
- ISWFoam/setRhoFields/Make/linux64GccDPInt32Opt/sourceFiles
- ISWFoam/setRhoFields/Make/linux64GccDPInt32Opt/variables
- ISWFoam/setRhoFields/Make/linux64IccDPInt32Opt/
- ISWFoam/setRhoFields/Make/linux64IccDPInt32Opt/options
- ISWFoam/setRhoFields/Make/linux64IccDPInt32Opt/setFields.C.dep
- ISWFoam/setRhoFields/Make/linux64IccDPInt32Opt/sourceFiles
- ISWFoam/setRhoFields/Make/linux64IccDPInt32Opt/variables
- ISWFoam/setRhoFields/Make/options
- ISWFoam/setRhoFields/setRhoFields.C
- ISWFoam/setUFields/
- ISWFoam/setUFields/Make/
- ISWFoam/setUFields/Make/files
- ISWFoam/setUFields/Make/linux64GccDPInt32Opt/
- ISWFoam/setUFields/Make/linux64GccDPInt32Opt/options
- ISWFoam/setUFields/Make/linux64GccDPInt32Opt/setUFields.C.dep
- ISWFoam/setUFields/Make/linux64GccDPInt32Opt/setUFields.o
- ISWFoam/setUFields/Make/linux64GccDPInt32Opt/sourceFiles
- ISWFoam/setUFields/Make/linux64GccDPInt32Opt/variables
- ISWFoam/setUFields/Make/options
- ISWFoam/setUFields/setUFields.C
- ISWFoam/tutorial/
- ISWFoam/tutorial/FlatBottom-DJLES/
- ISWFoam/tutorial/FlatBottom-DJLES/0.orig/
- ISWFoam/tutorial/FlatBottom-DJLES/0.orig/epsilon
- ISWFoam/tutorial/FlatBottom-DJLES/0.orig/initialFieldsRho
- ISWFoam/tutorial/FlatBottom-DJLES/0.orig/initialFieldsU
- ISWFoam/tutorial/FlatBottom-DJLES/0.orig/k
- ISWFoam/tutorial/FlatBottom-DJLES/0.orig/nut
- ISWFoam/tutorial/FlatBottom-DJLES/0.orig/omega
- ISWFoam/tutorial/FlatBottom-DJLES/0.orig/p_rgh
- ISWFoam/tutorial/FlatBottom-DJLES/0.orig/rho
- ISWFoam/tutorial/FlatBottom-DJLES/0.orig/U
- ISWFoam/tutorial/FlatBottom-DJLES/Allclean
- ISWFoam/tutorial/FlatBottom-DJLES/Allrun
- ISWFoam/tutorial/FlatBottom-DJLES/Allrun.pre
- ISWFoam/tutorial/FlatBottom-DJLES/constant/
- ISWFoam/tutorial/FlatBottom-DJLES/constant/g
- ISWFoam/tutorial/FlatBottom-DJLES/constant/momSourceDict
- ISWFoam/tutorial/FlatBottom-DJLES/constant/transportProperties
- ISWFoam/tutorial/FlatBottom-DJLES/constant/turbulenceProperties
- ISWFoam/tutorial/FlatBottom-DJLES/postSensDensity.py
- ISWFoam/tutorial/FlatBottom-DJLES/README.md
- ISWFoam/tutorial/FlatBottom-DJLES/system/
- ISWFoam/tutorial/FlatBottom-DJLES/system/blockMeshDict
- ISWFoam/tutorial/FlatBottom-DJLES/system/controlDict
- ISWFoam/tutorial/FlatBottom-DJLES/system/decomposeParDict
- ISWFoam/tutorial/FlatBottom-DJLES/system/fvSchemes
- ISWFoam/tutorial/FlatBottom-DJLES/system/fvSolution
- ISWFoam/tutorial/FlatBottom-eKdV/
- ISWFoam/tutorial/FlatBottom-eKdV/0.orig/
- ISWFoam/tutorial/FlatBottom-eKdV/0.orig/epsilon
- ISWFoam/tutorial/FlatBottom-eKdV/0.orig/k
- ISWFoam/tutorial/FlatBottom-eKdV/0.orig/nut
- ISWFoam/tutorial/FlatBottom-eKdV/0.orig/omega
- ISWFoam/tutorial/FlatBottom-eKdV/0.orig/p_rgh
- ISWFoam/tutorial/FlatBottom-eKdV/0.orig/rho
- ISWFoam/tutorial/FlatBottom-eKdV/0.orig/U
- ISWFoam/tutorial/FlatBottom-eKdV/Allclean
- ISWFoam/tutorial/FlatBottom-eKdV/Allrun
- ISWFoam/tutorial/FlatBottom-eKdV/Allrun.pre
- ISWFoam/tutorial/FlatBottom-eKdV/constant/
- ISWFoam/tutorial/FlatBottom-eKdV/constant/g
- ISWFoam/tutorial/FlatBottom-eKdV/constant/momSourceDict
- ISWFoam/tutorial/FlatBottom-eKdV/constant/transportProperties
- ISWFoam/tutorial/FlatBottom-eKdV/constant/turbulenceProperties
- ISWFoam/tutorial/FlatBottom-eKdV/postSensDensity.py
- ISWFoam/tutorial/FlatBottom-eKdV/README.md
- ISWFoam/tutorial/FlatBottom-eKdV/system/
- ISWFoam/tutorial/FlatBottom-eKdV/system/blockMeshDict
- ISWFoam/tutorial/FlatBottom-eKdV/system/controlDict
- ISWFoam/tutorial/FlatBottom-eKdV/system/decomposeParDict
- ISWFoam/tutorial/FlatBottom-eKdV/system/fvSchemes
- ISWFoam/tutorial/FlatBottom-eKdV/system/fvSolution
- ISWFoam/tutorial/FlatBottom-eKdV/system/setAlphaFieldsDict
- ISWFoam/tutorial/FlatBottom-eKdV/system/setRhoFieldsDict
- ISWFoam/tutorial/FlatBottom-eKdV/system/setUFieldsDict
