# Supplementary material for: ISWFoam: A numerical model for internal solitary wave simulation in continuously stratified fluids
Source: Copernicus journal article supplement (doi:10.5194/gmd-2021-102), 2021-05-27
Supplement: Supplementary file 2 [file gmd-2021-102-supplement.zip › ISWFoam/Allwmake]

#! /bin/bash

cd ./densityTurbulenceModels-master
wclean
wmake
cd ../ISWFoam-master
wclean
wmake
cd ../setRhoFields
wclean
wmake
cd ../setUFields
wclean
wmake 
