# Supplementary material for: ISWFoam: A numerical model for internal solitary wave simulation in continuously stratified fluids
Source: Copernicus journal article supplement (doi:10.5194/gmd-2021-102), 2021-05-27
Supplement: Supplementary file 2 [file gmd-2021-102-supplement.zip › ISWFoam/densityTurbulenceModels-master/kOmegaSSTdensity/kOmegaSSTdensity.H]

/*---------------------------------------------------------------------------*\
  =========                 |
  \\      /  F ield         | OpenFOAM: The Open Source CFD Toolbox
   \\    /   O peration     |
    \\  /    A nd           | Copyright (C) 2004-2011 OpenCFD Ltd.
     \\/     M anipulation  |
-------------------------------------------------------------------------------
                            | Copyright (C) 2011-2016 OpenFOAM Foundation
-------------------------------------------------------------------------------
License
    This file is part of OpenFOAM.

    OpenFOAM is free software: you can redistribute it and/or modify it
    under the terms of the GNU General Public License as published by
    the Free Software Foundation, either version 3 of the License, or
    (at your option) any later version.

    OpenFOAM is distributed in the hope that it will be useful, but WITHOUT
    ANY WARRANTY; without even the implied warranty of MERCHANTABILITY or
    FITNESS FOR A PARTICULAR PURPOSE.  See the GNU General Public License
    for more details.

    You should have received a copy of the GNU General Public License
    along with OpenFOAM.  If not, see <http://www.gnu.org/licenses/>.

Class
    Foam::RASModels::kOmegaSSTdensity

Group
    grpRASTurbulence

Description
    Implementation of the k-omega-SST turbulence model for
    incompressible and compressible flows.

    Light wrapper around base class.

    Turbulence model described in:
    \verbatim
        Menter, F. R. & Esch, T. (2001).
        Elements of Industrial Heat Transfer Prediction.
        16th Brazilian Congress of Mechanical Engineering (COBEM).
    \endverbatim

    with updated coefficients from
    \verbatim
        Menter, F. R., Kuntz, M., and Langtry, R. (2003).
        Ten Years of Industrial Experience with the SST Turbulence Model.
        Turbulence, Heat and Mass Transfer 4, ed: K. Hanjalic, Y. Nagano,
        & M. Tummers, Begell House, Inc., 625 - 632.
    \endverbatim

    but with the consistent production terms from the 2001 paper as form in the
    2003 paper is a typo, see
    \verbatim
        http://turbmodels.larc.nasa.gov/sst.html
    \endverbatim

    and the addition of the optional F3 term for rough walls from
    \verbatim
        Hellsten, A. (1998).
        "Some Improvements in Menter’s k-omega-SST turbulence model"
        29th AIAA Fluid Dynamics Conference, AIAA-98-2554.
    \endverbatim

    Note that this implementation is written in terms of alpha diffusion
    coefficients rather than the more traditional sigma (alpha = 1/sigma) so
    that the blending can be applied to all coefficuients in a consistent
    manner.  The paper suggests that sigma is blended but this would not be
    consistent with the blending of the k-epsilon and k-omega models.

    Also note that the error in the last term of equation (2) relating to
    sigma has been corrected.

    Wall-functions are applied in this implementation by using equations (14)
    to specify the near-wall omega as appropriate.

    The blending functions (15) and (16) are not currently used because of the
    uncertainty in their origin, range of applicability and that if y+ becomes
    sufficiently small blending u_tau in this manner clearly becomes nonsense.

    The default model coefficients are
    \verbatim
        kOmegaSSTdensityCoeffs
        {
            alphaK1     0.85;
            alphaK2     1.0;
            alphaOmega1 0.5;
            alphaOmega2 0.856;
            beta1       0.075;
            beta2       0.0828;
            betaStar    0.09;
            gamma1      5/9;
            gamma2      0.44;
            a1          0.31;
            b1          1.0;
            c1          10.0;
            F3          no;
        }
    \endverbatim

SourceFiles
    kOmegaSSTdensity.C

SeeAlso
    kOmegaSSTdensityBase.H

\*---------------------------------------------------------------------------*/

#ifndef kOmegaSSTdensity_H
#define kOmegaSSTdensity_H

#include "kOmegaSSTdensityBase.H"
#include "RASModel.H"
#include "eddyViscosity.H"

// * * * * * * * * * * * * * * * * * * * * * * * * * * * * * * * * * * * * * //

namespace Foam
{
namespace RASModels
{

/*---------------------------------------------------------------------------*\
                          Class kOmegaSSTdensity Declaration
\*---------------------------------------------------------------------------*/

template<class BasicTurbulenceModel>
class kOmegaSSTdensity
:
    public kOmegaSSTdensityBase<eddyViscosity<RASModel<BasicTurbulenceModel>>>
{
    // Private Member Functions

        //- No copy construct
        kOmegaSSTdensity(const kOmegaSSTdensity&) = delete;

        //- No copy assignment
        void operator=(const kOmegaSSTdensity&) = delete;


protected:

    // Protected Member Functions

        virtual void correctNut(const volScalarField& S2);
        virtual void correctNut();


public:

    typedef typename BasicTurbulenceModel::alphaField alphaField;
    typedef typename BasicTurbulenceModel::rhoField rhoField;
    typedef typename BasicTurbulenceModel::transportModel transportModel;


    //- Runtime type information
    TypeName("kOmegaSSTdensity");


    // Constructors

        //- Construct from components
        kOmegaSSTdensity
        (
            const alphaField& alpha,
            const rhoField& rho,
            const volVectorField& U,
            const surfaceScalarField& alphaRhoPhi,
            const surfaceScalarField& phi,
            const transportModel& transport,
            const word& propertiesName = turbulenceModel::propertiesName,
            const word& type = typeName
        );


    //- Destructor
    virtual ~kOmegaSSTdensity()
    {}
};


// * * * * * * * * * * * * * * * * * * * * * * * * * * * * * * * * * * * * * //

} // End namespace RASModels
} // End namespace Foam

// * * * * * * * * * * * * * * * * * * * * * * * * * * * * * * * * * * * * * //
#ifdef NoRepository
    #include "kOmegaSSTdensity.C"
#endif

// * * * * * * * * * * * * * * * * * * * * * * * * * * * * * * * * * * * * * //
#endif

// ************************************************************************* //
