# Supplementary material for: ISWFoam: A numerical model for internal solitary wave simulation in continuously stratified fluids
Source: Copernicus journal article supplement (doi:10.5194/gmd-2021-102), 2021-05-27
Supplement: Supplementary file 2 [file gmd-2021-102-supplement.zip › ISWFoam/densityTurbulenceModels-master/lnInclude/makeDensityTurbModel.C]

/*---------------------------------------------------------------------------*\
  =========                 |
  \\      /  F ield         | OpenFOAM: The Open Source CFD Toolbox
   \\    /   O peration     |
    \\  /    A nd           | Copyright (C) 2011-2015 OpenFOAM Foundation
     \\/     M anipulation  | Copyright (C) 2016-2017 OpenCFD Ltd.
-------------------------------------------------------------------------------
License
    This file is part of OpenFOAM.

    OpenFOAM is free software: you can redistribute it and/or modify it
    under the terms of the GNU General Public License as published by
    the Free Software Foundation, either version 3 of the License, or
    (at your option) any later version.

    OpenFOAM is distributed in the hope that it will be useful, but WITHOUT
    ANY WARRANTY; without even the implied warranty of MERCHANTABILITY or
    FITNESS FOR A PARTICULAR PURPOSE.  See the GNU General Public License
    for more details.

    You should have received a copy of the GNU General Public License
    along with OpenFOAM.  If not, see <http://www.gnu.org/licenses/>.

\*---------------------------------------------------------------------------*/

#include "IncompressibleTurbulenceModel.H"
#include "transportModel.H"
#include "addToRunTimeSelectionTable.H"
#include "makeTurbulenceModel.H"

#include "laminarModel.H"
#include "RASModel.H"
#include "LESModel.H"

// * * * * * * * * * * * * * * * * * * * * * * * * * * * * * * * * * * * * * //

#define createBaseTurbulenceModel(Alpha, Rho, baseModel, BaseModel, Transport)  \
                                                                               \
    namespace Foam                                                             \
    {                                                                          \
        typedef BaseModel<Transport> Transport##BaseModel;                     \
        typedef RASModel<Transport##BaseModel> RAS##Transport##BaseModel;      \
        typedef LESModel<Transport##BaseModel> LES##Transport##BaseModel;      \
    }   

createBaseTurbulenceModel
(
    geometricOneField,
    geometricOneField,
    incompressibleTurbulenceModel,
    IncompressibleTurbulenceModel,
    transportModel
);

#define makeRASModel(Type)                                                     \
    makeTemplatedTurbulenceModel                                               \
    (transportModelIncompressibleTurbulenceModel, RAS, Type)

#define makeLESModel(Type)                                                     \
    makeTemplatedTurbulenceModel                                               \
    (transportModelIncompressibleTurbulenceModel, LES, Type)


// -------------------------------------------------------------------------- //
// RAS models
// -------------------------------------------------------------------------- //

#include "kOmegadensity.H"
makeRASModel(kOmegadensity);

#include "kOmegaSSTdensity.H"
makeRASModel(kOmegaSSTdensity);


// ************************************************************************* //
