# Supplementary material for: ISWFoam: A numerical model for internal solitary wave simulation in continuously stratified fluids
Source: Copernicus journal article supplement (doi:10.5194/gmd-2021-102), 2021-05-27
Supplement: Supplementary file 2 [file gmd-2021-102-supplement.zip › ISWFoam/ISWFoam-master/Make/linux64GccDPInt32Opt/options]

# 1 "Make/options"
# 1 "<built-in>"
# 1 "<command-line>"


# 1 "/usr/include/stdc-predef.h" 1 3 4

# 17 "/usr/include/stdc-predef.h" 3 4


# 6 "<command-line>" 2
# 1 "Make/options"
EXE_INC = -I$(LIB_SRC)/sampling/lnInclude -I$(LIB_SRC)/finiteVolume/lnInclude -I$(LIB_SRC)/meshTools/lnInclude -I$(LIB_SRC)/TurbulenceModels/turbulenceModels/lnInclude -I$(LIB_SRC)/TurbulenceModels/incompressible/lnInclude -I$(LIB_SRC)/transportModels -I$(LIB_SRC)/transportModels/incompressible/singlePhaseTransportModel -I$(LIB_SRC)/thermophysicalModels/radiation/lnInclude
# 10 "Make/options"

EXE_LIBS = -lfiniteVolume -lfvOptions -lmeshTools -lsampling -lturbulenceModels -lincompressibleTurbulenceModels -lincompressibleTransportModels -lradiationModels -latmosphericModels
