# Supplementary material for: ISWFoam: A numerical model for internal solitary wave simulation in continuously stratified fluids
Source: Copernicus journal article supplement (doi:10.5194/gmd-2021-102), 2021-05-27
Supplement: Supplementary file 2 [file gmd-2021-102-supplement.zip › ISWFoam/ISWFoam-master/readTransportProperties.H]

singlePhaseTransportModel laminarTransport(U, phi);
dimensionedScalar rhoRef("rhoRef", dimDensity, laminarTransport);
dimensionedVector CoriolisVector("CoriolisVector", laminarTransport);
