# Supplementary material for: ISWFoam: A numerical model for internal solitary wave simulation in continuously stratified fluids
Source: Copernicus journal article supplement (doi:10.5194/gmd-2021-102), 2021-05-27
Supplement: Supplementary file 2 [file gmd-2021-102-supplement.zip › ISWFoam/ISWFoam-master/rhoEqn.H]

    // Solve the density transport equation
    fvScalarMatrix rhoEqn
    (
        fvm::ddt(rho) 
        + fvm::div(phi, rho)
        - fvm::laplacian(DK,rho)
     ==
        fvOptions(rho)
    );

    rhoEqn.relax();

    fvOptions.constrain(rhoEqn);

    rhoEqn.solve();

    fvOptions.correct(rho);

    deltaRho = rho/rhoRef*I;
