# Supplementary material for: ISWFoam: A numerical model for internal solitary wave simulation in continuously stratified fluids
Source: Copernicus journal article supplement (doi:10.5194/gmd-2021-102), 2021-05-27
Supplement: Supplementary file 2 [file gmd-2021-102-supplement.zip › ISWFoam/setRhoFields/Make/linux64GccDPInt32Opt/variables]

EXE = $(FOAM_USER_APPBIN)/setRhoFields
