# Supplementary material for: ISWFoam: A numerical model for internal solitary wave simulation in continuously stratified fluids
Source: Copernicus journal article supplement (doi:10.5194/gmd-2021-102), 2021-05-27
Supplement: Supplementary file 2 [file gmd-2021-102-supplement.zip › ISWFoam/setRhoFields/Make/linux64IccDPInt32Opt/options]

# 1 "Make/options"
# 1 "<built-in>"
# 1 "<command-line>"
# 10 "<command-line>"
# 1 "/usr/include/stdc-predef.h" 1 3 4

# 17 "/usr/include/stdc-predef.h" 3 4


# 10 "<command-line>" 2
# 1 "Make/options"
EXE_INC = -I$(LIB_SRC)/finiteVolume/lnInclude -I$(LIB_SRC)/meshTools/lnInclude


EXE_LIBS = -lfiniteVolume -lmeshTools -lgenericPatchFields
