# Supplementary material for: ISWFoam: A numerical model for internal solitary wave simulation in continuously stratified fluids
Source: Copernicus journal article supplement (doi:10.5194/gmd-2021-102), 2021-05-27
Supplement: Supplementary file 2 [file gmd-2021-102-supplement.zip › ISWFoam/setUFields/Make/linux64GccDPInt32Opt/setUFields.C.dep]

$(OBJECTS_DIR)/setUFields.C.dep: \
setUFields.C \
$(WM_PROJECT_DIR)/src/OpenFOAM/lnInclude/argList.H \
$(WM_PROJECT_DIR)/src/OpenFOAM/lnInclude/stringList.H \
$(WM_PROJECT_DIR)/src/OpenFOAM/lnInclude/string.H \
$(WM_PROJECT_DIR)/src/OpenFOAM/lnInclude/char.H \
$(WM_PROJECT_DIR)/src/OpenFOAM/lnInclude/Hasher.H \
$(WM_PROJECT_DIR)/src/OpenFOAM/lnInclude/stringI.H \
$(WM_PROJECT_DIR)/src/OpenFOAM/lnInclude/stringTemplates.C \
$(WM_PROJECT_DIR)/src/OpenFOAM/lnInclude/List.H \
$(WM_PROJECT_DIR)/src/OpenFOAM/lnInclude/UList.H \
$(WM_PROJECT_DIR)/src/OpenFOAM/lnInclude/bool.H \
$(WM_PROJECT_DIR)/src/OpenFOAM/lnInclude/pTraits.H \
$(WM_PROJECT_DIR)/src/OpenFOAM/lnInclude/direction.H \
$(WM_PROJECT_DIR)/src/OpenFOAM/lnInclude/label.H \
$(WM_PROJECT_DIR)/src/OpenFOAM/lnInclude/int.H \
$(WM_PROJECT_DIR)/src/OpenFOAM/lnInclude/int16.H \
$(WM_PROJECT_DIR)/src/OpenFOAM/lnInclude/word.H \
$(WM_PROJECT_DIR)/src/OpenFOAM/lnInclude/wordI.H \
$(WM_PROJECT_DIR)/src/OpenFOAM/lnInclude/int32.H \
$(WM_PROJECT_DIR)/src/OpenFOAM/lnInclude/int64.H \
$(WM_PROJECT_DIR)/src/OpenFOAM/lnInclude/labelSpecific.H \
$(WM_PROJECT_DIR)/src/OpenFOAM/lnInclude/uLabel.H \
$(WM_PROJECT_DIR)/src/OpenFOAM/lnInclude/uint.H \
$(WM_PROJECT_DIR)/src/OpenFOAM/lnInclude/uint16.H \
$(WM_PROJECT_DIR)/src/OpenFOAM/lnInclude/uint32.H \
$(WM_PROJECT_DIR)/src/OpenFOAM/lnInclude/uint64.H \
$(WM_PROJECT_DIR)/src/OpenFOAM/lnInclude/zero.H \
$(WM_PROJECT_DIR)/src/OpenFOAM/lnInclude/zeroI.H \
$(WM_PROJECT_DIR)/src/OpenFOAM/lnInclude/scalar.H \
$(WM_PROJECT_DIR)/src/OpenFOAM/lnInclude/floatScalar.H \
$(WM_PROJECT_DIR)/src/OpenFOAM/lnInclude/doubleFloat.H \
$(WM_PROJECT_DIR)/src/OpenFOAM/lnInclude/products.H \
$(WM_PROJECT_DIR)/src/OpenFOAM/lnInclude/Scalar.H \
$(WM_PROJECT_DIR)/src/OpenFOAM/lnInclude/doubleScalar.H \
$(WM_PROJECT_DIR)/src/OpenFOAM/lnInclude/contiguous.H \
$(WM_PROJECT_DIR)/src/OpenFOAM/lnInclude/nullObject.H \
$(WM_PROJECT_DIR)/src/OpenFOAM/lnInclude/nullObjectI.H \
$(WM_PROJECT_DIR)/src/OpenFOAM/lnInclude/stdFoam.H \
$(WM_PROJECT_DIR)/src/OpenFOAM/lnInclude/Swap.H \
$(WM_PROJECT_DIR)/src/OpenFOAM/lnInclude/HashFwd.H \
$(WM_PROJECT_DIR)/src/OpenFOAM/lnInclude/ListPolicy.H \
$(WM_PROJECT_DIR)/src/OpenFOAM/lnInclude/UListI.H \
$(WM_PROJECT_DIR)/src/OpenFOAM/lnInclude/error.H \
$(WM_PROJECT_DIR)/src/OpenFOAM/lnInclude/messageStream.H \
$(WM_PROJECT_DIR)/src/OpenFOAM/lnInclude/OSstream.H \
$(WM_PROJECT_DIR)/src/OpenFOAM/lnInclude/Ostream.H \
$(WM_PROJECT_DIR)/src/OpenFOAM/lnInclude/IOstream.H \
$(WM_PROJECT_DIR)/src/OpenFOAM/lnInclude/fileName.H \
$(WM_PROJECT_DIR)/src/OpenFOAM/lnInclude/fileNameI.H \
$(WM_PROJECT_DIR)/src/OpenFOAM/lnInclude/InfoProxy.H \
$(WM_PROJECT_DIR)/src/OpenFOAM/lnInclude/IOstreamOption.H \
$(WM_PROJECT_DIR)/src/OpenFOAM/lnInclude/keyType.H \
$(WM_PROJECT_DIR)/src/OpenFOAM/lnInclude/keyTypeI.H \
$(WM_PROJECT_DIR)/src/OpenFOAM/lnInclude/OSstreamI.H \
$(WM_PROJECT_DIR)/src/OpenFOAM/lnInclude/errorManip.H \
$(WM_PROJECT_DIR)/src/OpenFOAM/lnInclude/UList.C \
$(WM_PROJECT_DIR)/src/OpenFOAM/lnInclude/ListLoopM.H \
$(WM_PROJECT_DIR)/src/OpenFOAM/lnInclude/labelRange.H \
$(WM_PROJECT_DIR)/src/OpenFOAM/lnInclude/labelRangeI.H \
$(WM_PROJECT_DIR)/src/OpenFOAM/lnInclude/UListIO.C \
$(WM_PROJECT_DIR)/src/OpenFOAM/lnInclude/token.H \
$(WM_PROJECT_DIR)/src/OpenFOAM/lnInclude/refCount.H \
$(WM_PROJECT_DIR)/src/OpenFOAM/lnInclude/typeInfo.H \
$(WM_PROJECT_DIR)/src/OpenFOAM/lnInclude/className.H \
$(WM_PROJECT_DIR)/src/OpenFOAM/lnInclude/defineDebugSwitch.H \
$(WM_PROJECT_DIR)/src/OpenFOAM/lnInclude/simpleRegIOobject.H \
$(WM_PROJECT_DIR)/src/OpenFOAM/lnInclude/debug.H \
$(WM_PROJECT_DIR)/src/OpenFOAM/lnInclude/runTimeSelectionTables.H \
$(WM_PROJECT_DIR)/src/OpenFOAM/lnInclude/autoPtr.H \
$(WM_PROJECT_DIR)/src/OpenFOAM/lnInclude/autoPtrI.H \
$(WM_PROJECT_DIR)/src/OpenFOAM/lnInclude/HashTable.H \
$(WM_PROJECT_DIR)/src/OpenFOAM/lnInclude/Hash.H \
$(WM_PROJECT_DIR)/src/OpenFOAM/lnInclude/wordRe.H \
$(WM_PROJECT_DIR)/src/OSspecific/POSIX/lnInclude/regExp.H \
$(WM_PROJECT_DIR)/src/OpenFOAM/lnInclude/regExpCxx.H \
$(WM_PROJECT_DIR)/src/OpenFOAM/lnInclude/regExpCxxI.H \
$(WM_PROJECT_DIR)/src/OSspecific/POSIX/lnInclude/regExpPosix.H \
$(WM_PROJECT_DIR)/src/OSspecific/POSIX/lnInclude/regExpPosixI.H \
$(WM_PROJECT_DIR)/src/OSspecific/POSIX/lnInclude/regExpFwd.H \
$(WM_PROJECT_DIR)/src/OpenFOAM/lnInclude/wordReI.H \
$(WM_PROJECT_DIR)/src/OpenFOAM/lnInclude/HashTableDetail.H \
$(WM_PROJECT_DIR)/src/OpenFOAM/lnInclude/HashTableCore.H \
$(WM_PROJECT_DIR)/src/OpenFOAM/lnInclude/HashTableCoreI.H \
$(WM_PROJECT_DIR)/src/OpenFOAM/lnInclude/HashTableI.H \
$(WM_PROJECT_DIR)/src/OpenFOAM/lnInclude/HashTableIterI.H \
$(WM_PROJECT_DIR)/src/OpenFOAM/lnInclude/HashTable.C \
$(WM_PROJECT_DIR)/src/OpenFOAM/lnInclude/FixedList.H \
$(WM_PROJECT_DIR)/src/OpenFOAM/lnInclude/SLListFwd.H \
$(WM_PROJECT_DIR)/src/OpenFOAM/lnInclude/FixedListI.H \
$(WM_PROJECT_DIR)/src/OpenFOAM/lnInclude/SLList.H \
$(WM_PROJECT_DIR)/src/OpenFOAM/lnInclude/SLListBase.H \
$(WM_PROJECT_DIR)/src/OpenFOAM/lnInclude/SLListBaseI.H \
$(WM_PROJECT_DIR)/src/OpenFOAM/lnInclude/LList.H \
$(WM_PROJECT_DIR)/src/OpenFOAM/lnInclude/LList.C \
$(WM_PROJECT_DIR)/src/OpenFOAM/lnInclude/LListIO.C \
$(WM_PROJECT_DIR)/src/OpenFOAM/lnInclude/Istream.H \
$(WM_PROJECT_DIR)/src/OpenFOAM/lnInclude/FixedList.C \
$(WM_PROJECT_DIR)/src/OpenFOAM/lnInclude/FixedListIO.C \
$(WM_PROJECT_DIR)/src/OpenFOAM/lnInclude/HashTableIter.C \
$(WM_PROJECT_DIR)/src/OpenFOAM/lnInclude/HashTableIO.C \
$(WM_PROJECT_DIR)/src/OpenFOAM/lnInclude/tokenI.H \
$(WM_PROJECT_DIR)/src/OpenFOAM/lnInclude/stdVectorIO.C \
$(WM_PROJECT_DIR)/src/OpenFOAM/lnInclude/one.H \
$(WM_PROJECT_DIR)/src/OpenFOAM/lnInclude/oneI.H \
$(WM_PROJECT_DIR)/src/OpenFOAM/lnInclude/ListI.H \
$(WM_PROJECT_DIR)/src/OpenFOAM/lnInclude/List.C \
$(WM_PROJECT_DIR)/src/OpenFOAM/lnInclude/PtrList.H \
$(WM_PROJECT_DIR)/src/OpenFOAM/lnInclude/UPtrList.H \
$(WM_PROJECT_DIR)/src/OpenFOAM/lnInclude/PtrListDetail.H \
$(WM_PROJECT_DIR)/src/OpenFOAM/lnInclude/PtrListDetailI.H \
$(WM_PROJECT_DIR)/src/OpenFOAM/lnInclude/PtrListDetail.C \
$(WM_PROJECT_DIR)/src/OpenFOAM/lnInclude/PtrListDetailIO.C \
$(WM_PROJECT_DIR)/src/OpenFOAM/lnInclude/UPtrListI.H \
$(WM_PROJECT_DIR)/src/OpenFOAM/lnInclude/UPtrList.C \
$(WM_PROJECT_DIR)/src/OpenFOAM/lnInclude/SLPtrListFwd.H \
$(WM_PROJECT_DIR)/src/OpenFOAM/lnInclude/PtrListI.H \
$(WM_PROJECT_DIR)/src/OpenFOAM/lnInclude/tmp.H \
$(WM_PROJECT_DIR)/src/OpenFOAM/lnInclude/tmpI.H \
$(WM_PROJECT_DIR)/src/OpenFOAM/lnInclude/PtrList.C \
$(WM_PROJECT_DIR)/src/OpenFOAM/lnInclude/SLPtrList.H \
$(WM_PROJECT_DIR)/src/OpenFOAM/lnInclude/LPtrList.H \
$(WM_PROJECT_DIR)/src/OpenFOAM/lnInclude/LPtrList.C \
$(WM_PROJECT_DIR)/src/OpenFOAM/lnInclude/LPtrListIO.C \
$(WM_PROJECT_DIR)/src/OpenFOAM/lnInclude/INew.H \
$(WM_PROJECT_DIR)/src/OpenFOAM/lnInclude/PtrListIO.C \
$(WM_PROJECT_DIR)/src/OpenFOAM/lnInclude/ListIO.C \
$(WM_PROJECT_DIR)/src/OpenFOAM/lnInclude/SubList.H \
$(WM_PROJECT_DIR)/src/OpenFOAM/lnInclude/SubListI.H \
$(WM_PROJECT_DIR)/src/OpenFOAM/lnInclude/HashSet.H \
$(WM_PROJECT_DIR)/src/OpenFOAM/lnInclude/IndirectList.H \
$(WM_PROJECT_DIR)/src/OpenFOAM/lnInclude/IndirectListAddressing.H \
$(WM_PROJECT_DIR)/src/OpenFOAM/lnInclude/UIndirectList.H \
$(WM_PROJECT_DIR)/src/OpenFOAM/lnInclude/IndirectListBase.H \
$(WM_PROJECT_DIR)/src/OpenFOAM/lnInclude/IndirectListBaseI.H \
$(WM_PROJECT_DIR)/src/OpenFOAM/lnInclude/IndirectListBase.C \
$(WM_PROJECT_DIR)/src/OpenFOAM/lnInclude/IndirectListBaseIO.C \
$(WM_PROJECT_DIR)/src/OpenFOAM/lnInclude/IndirectListI.H \
$(WM_PROJECT_DIR)/src/OpenFOAM/lnInclude/HashSet.C \
$(WM_PROJECT_DIR)/src/OpenFOAM/lnInclude/parRun.H \
$(WM_PROJECT_DIR)/src/OpenFOAM/lnInclude/Pstream.H \
$(WM_PROJECT_DIR)/src/OpenFOAM/lnInclude/UPstream.H \
$(WM_PROJECT_DIR)/src/OpenFOAM/lnInclude/labelList.H \
$(WM_PROJECT_DIR)/src/OpenFOAM/lnInclude/DynamicList.H \
$(WM_PROJECT_DIR)/src/OpenFOAM/lnInclude/DynamicListI.H \
$(WM_PROJECT_DIR)/src/OpenFOAM/lnInclude/DynamicList.C \
$(WM_PROJECT_DIR)/src/OpenFOAM/lnInclude/Enum.H \
$(WM_PROJECT_DIR)/src/OpenFOAM/lnInclude/wordList.H \
$(WM_PROJECT_DIR)/src/OpenFOAM/lnInclude/EnumI.H \
$(WM_PROJECT_DIR)/src/OpenFOAM/lnInclude/Enum.C \
$(WM_PROJECT_DIR)/src/OpenFOAM/lnInclude/dictionary.H \
$(WM_PROJECT_DIR)/src/OpenFOAM/lnInclude/entry.H \
$(WM_PROJECT_DIR)/src/OpenFOAM/lnInclude/IDLList.H \
$(WM_PROJECT_DIR)/src/OpenFOAM/lnInclude/ILList.H \
$(WM_PROJECT_DIR)/src/OpenFOAM/lnInclude/UILList.H \
$(WM_PROJECT_DIR)/src/OpenFOAM/lnInclude/UILList.C \
$(WM_PROJECT_DIR)/src/OpenFOAM/lnInclude/UILListIO.C \
$(WM_PROJECT_DIR)/src/OpenFOAM/lnInclude/ILList.C \
$(WM_PROJECT_DIR)/src/OpenFOAM/lnInclude/ILListIO.C \
$(WM_PROJECT_DIR)/src/OpenFOAM/lnInclude/DLListBase.H \
$(WM_PROJECT_DIR)/src/OpenFOAM/lnInclude/DLListBaseI.H \
$(WM_PROJECT_DIR)/src/OpenFOAM/lnInclude/DLList.H \
$(WM_PROJECT_DIR)/src/OpenFOAM/lnInclude/ITstream.H \
$(WM_PROJECT_DIR)/src/OpenFOAM/lnInclude/tokenList.H \
$(WM_PROJECT_DIR)/src/OpenFOAM/lnInclude/dictionaryTemplates.C \
$(WM_PROJECT_DIR)/src/OpenFOAM/lnInclude/primitiveEntry.H \
$(WM_PROJECT_DIR)/src/OpenFOAM/lnInclude/primitiveEntryTemplates.C \
$(WM_PROJECT_DIR)/src/OpenFOAM/lnInclude/StringStream.H \
$(WM_PROJECT_DIR)/src/OpenFOAM/lnInclude/ISstream.H \
$(WM_PROJECT_DIR)/src/OpenFOAM/lnInclude/ISstreamI.H \
$(WM_PROJECT_DIR)/src/OpenFOAM/lnInclude/ListOps.H \
$(WM_PROJECT_DIR)/src/OpenFOAM/lnInclude/FlatOutput.H \
$(WM_PROJECT_DIR)/src/OpenFOAM/lnInclude/labelPair.H \
$(WM_PROJECT_DIR)/src/OpenFOAM/lnInclude/Pair.H \
$(WM_PROJECT_DIR)/src/OpenFOAM/lnInclude/PairI.H \
$(WM_PROJECT_DIR)/src/OpenFOAM/lnInclude/Map.H \
$(WM_PROJECT_DIR)/src/OpenFOAM/lnInclude/bitSet.H \
$(WM_PROJECT_DIR)/src/OpenFOAM/lnInclude/PackedList.H \
$(WM_PROJECT_DIR)/src/OpenFOAM/lnInclude/BitOps.H \
$(WM_PROJECT_DIR)/src/OpenFOAM/lnInclude/PackedListCore.H \
$(WM_PROJECT_DIR)/src/OpenFOAM/lnInclude/PackedListI.H \
$(WM_PROJECT_DIR)/src/OpenFOAM/lnInclude/PackedList.C \
$(WM_PROJECT_DIR)/src/OpenFOAM/lnInclude/PackedListIO.C \
$(WM_PROJECT_DIR)/src/OpenFOAM/lnInclude/IOstreams.H \
$(WM_PROJECT_DIR)/src/OpenFOAM/lnInclude/prefixOSstream.H \
$(WM_PROJECT_DIR)/src/OpenFOAM/lnInclude/bitSetI.H \
$(WM_PROJECT_DIR)/src/OpenFOAM/lnInclude/bitSetTemplates.C \
$(WM_PROJECT_DIR)/src/OpenFOAM/lnInclude/ops.H \
$(WM_PROJECT_DIR)/src/OpenFOAM/lnInclude/ListOpsTemplates.C \
$(WM_PROJECT_DIR)/src/OpenFOAM/lnInclude/LIFOStack.H \
$(WM_PROJECT_DIR)/src/OpenFOAM/lnInclude/gatherScatter.C \
$(WM_PROJECT_DIR)/src/OpenFOAM/lnInclude/UOPstream.H \
$(WM_PROJECT_DIR)/src/OpenFOAM/lnInclude/PstreamBuffers.H \
$(WM_PROJECT_DIR)/src/OpenFOAM/lnInclude/OPstream.H \
$(WM_PROJECT_DIR)/src/OpenFOAM/lnInclude/UIPstream.H \
$(WM_PROJECT_DIR)/src/OpenFOAM/lnInclude/IPstream.H \
$(WM_PROJECT_DIR)/src/OpenFOAM/lnInclude/combineGatherScatter.C \
$(WM_PROJECT_DIR)/src/OpenFOAM/lnInclude/gatherScatterList.C \
$(WM_PROJECT_DIR)/src/OpenFOAM/lnInclude/exchange.C \
$(WM_PROJECT_DIR)/src/OpenFOAM/lnInclude/PstreamReduceOps.H \
$(WM_PROJECT_DIR)/src/OpenFOAM/lnInclude/vector2D.H \
$(WM_PROJECT_DIR)/src/OpenFOAM/lnInclude/Vector2D.H \
$(WM_PROJECT_DIR)/src/OpenFOAM/lnInclude/VectorSpace.H \
$(WM_PROJECT_DIR)/src/OpenFOAM/lnInclude/VectorSpaceI.H \
$(WM_PROJECT_DIR)/src/OpenFOAM/lnInclude/VectorSpaceOps.H \
$(WM_PROJECT_DIR)/src/OpenFOAM/lnInclude/VectorSpace.C \
$(WM_PROJECT_DIR)/src/OpenFOAM/lnInclude/Vector2DI.H \
$(WM_PROJECT_DIR)/src/OpenFOAM/lnInclude/OSspecific.H \
$(WM_PROJECT_DIR)/src/OpenFOAM/lnInclude/fileNameList.H \
$(WM_PROJECT_DIR)/src/OpenFOAM/lnInclude/argListI.H \
$(WM_PROJECT_DIR)/src/OpenFOAM/lnInclude/Time.H \
$(WM_PROJECT_DIR)/src/OpenFOAM/lnInclude/TimePaths.H \
$(WM_PROJECT_DIR)/src/OpenFOAM/lnInclude/instantList.H \
$(WM_PROJECT_DIR)/src/OpenFOAM/lnInclude/instant.H \
$(WM_PROJECT_DIR)/src/OpenFOAM/lnInclude/Instant.H \
$(WM_PROJECT_DIR)/src/OpenFOAM/lnInclude/Instant.C \
$(WM_PROJECT_DIR)/src/OpenFOAM/lnInclude/TimePathsI.H \
$(WM_PROJECT_DIR)/src/OpenFOAM/lnInclude/objectRegistry.H \
$(WM_PROJECT_DIR)/src/OpenFOAM/lnInclude/regIOobject.H \
$(WM_PROJECT_DIR)/src/OpenFOAM/lnInclude/IOobject.H \
$(WM_PROJECT_DIR)/src/OpenFOAM/lnInclude/IOobjectI.H \
$(WM_PROJECT_DIR)/src/OpenFOAM/lnInclude/IOobjectTemplates.C \
$(WM_PROJECT_DIR)/src/OpenFOAM/lnInclude/fileOperation.H \
$(WM_PROJECT_DIR)/src/OSspecific/POSIX/lnInclude/fileMonitor.H \
$(WM_PROJECT_DIR)/src/OpenFOAM/lnInclude/Switch.H \
$(WM_PROJECT_DIR)/src/OpenFOAM/lnInclude/tmpNrc.H \
$(WM_PROJECT_DIR)/src/OpenFOAM/lnInclude/tmpNrcI.H \
$(WM_PROJECT_DIR)/src/OpenFOAM/lnInclude/Tuple2.H \
$(WM_PROJECT_DIR)/src/OpenFOAM/lnInclude/regIOobjectI.H \
$(WM_PROJECT_DIR)/src/OpenFOAM/lnInclude/wordRes.H \
$(WM_PROJECT_DIR)/src/OpenFOAM/lnInclude/wordReList.H \
$(WM_PROJECT_DIR)/src/OpenFOAM/lnInclude/wordResI.H \
$(WM_PROJECT_DIR)/src/OpenFOAM/lnInclude/stringListOps.H \
$(WM_PROJECT_DIR)/src/OpenFOAM/lnInclude/stringListOpsTemplates.C \
$(WM_PROJECT_DIR)/src/OpenFOAM/lnInclude/objectRegistryTemplates.C \
$(WM_PROJECT_DIR)/src/OpenFOAM/lnInclude/predicates.H \
$(WM_PROJECT_DIR)/src/OpenFOAM/lnInclude/unwatchedIOdictionary.H \
$(WM_PROJECT_DIR)/src/OpenFOAM/lnInclude/baseIOdictionary.H \
$(WM_PROJECT_DIR)/src/OpenFOAM/lnInclude/FIFOStack.H \
$(WM_PROJECT_DIR)/src/OpenFOAM/lnInclude/clock.H \
$(WM_PROJECT_DIR)/src/OSspecific/POSIX/lnInclude/cpuTime.H \
$(WM_PROJECT_DIR)/src/OSspecific/POSIX/lnInclude/cpuTimePosix.H \
$(WM_PROJECT_DIR)/src/OSspecific/POSIX/lnInclude/cpuTimeFwd.H \
$(WM_PROJECT_DIR)/src/OpenFOAM/lnInclude/TimeState.H \
$(WM_PROJECT_DIR)/src/OpenFOAM/lnInclude/dimensionedScalar.H \
$(WM_PROJECT_DIR)/src/OpenFOAM/lnInclude/dimensionedType.H \
$(WM_PROJECT_DIR)/src/OpenFOAM/lnInclude/dimensionSet.H \
$(WM_PROJECT_DIR)/src/OpenFOAM/lnInclude/dimensionedScalarFwd.H \
$(WM_PROJECT_DIR)/src/OpenFOAM/lnInclude/scalarField.H \
$(WM_PROJECT_DIR)/src/OpenFOAM/lnInclude/Field.H \
$(WM_PROJECT_DIR)/src/OpenFOAM/lnInclude/scalarList.H \
$(WM_PROJECT_DIR)/src/OpenFOAM/lnInclude/FieldBase.H \
$(WM_PROJECT_DIR)/src/OpenFOAM/lnInclude/FieldI.H \
$(WM_PROJECT_DIR)/src/OpenFOAM/lnInclude/FieldFunctions.H \
$(WM_PROJECT_DIR)/src/OpenFOAM/lnInclude/FieldFunctionsM.H \
$(WM_PROJECT_DIR)/src/OpenFOAM/lnInclude/MinMax.H \
$(WM_PROJECT_DIR)/src/OpenFOAM/lnInclude/MinMaxI.H \
$(WM_PROJECT_DIR)/src/OpenFOAM/lnInclude/MinMaxOps.H \
$(WM_PROJECT_DIR)/src/OpenFOAM/lnInclude/undefFieldFunctionsM.H \
$(WM_PROJECT_DIR)/src/OpenFOAM/lnInclude/Field.C \
$(WM_PROJECT_DIR)/src/OpenFOAM/lnInclude/FieldMapper.H \
$(WM_PROJECT_DIR)/src/OpenFOAM/lnInclude/mapDistributeBase.H \
$(WM_PROJECT_DIR)/src/OpenFOAM/lnInclude/boolList.H \
$(WM_PROJECT_DIR)/src/OpenFOAM/lnInclude/mapDistributeBaseTemplates.C \
$(WM_PROJECT_DIR)/src/OpenFOAM/lnInclude/PstreamCombineReduceOps.H \
$(WM_PROJECT_DIR)/src/OpenFOAM/lnInclude/flipOp.H \
$(WM_PROJECT_DIR)/src/OpenFOAM/lnInclude/fieldTypes.H \
$(WM_PROJECT_DIR)/src/OpenFOAM/lnInclude/vector.H \
$(WM_PROJECT_DIR)/src/OpenFOAM/lnInclude/Vector.H \
$(WM_PROJECT_DIR)/src/OpenFOAM/lnInclude/VectorI.H \
$(WM_PROJECT_DIR)/src/OpenFOAM/lnInclude/sphericalTensor.H \
$(WM_PROJECT_DIR)/src/OpenFOAM/lnInclude/SphericalTensor.H \
$(WM_PROJECT_DIR)/src/OpenFOAM/lnInclude/SphericalTensorI.H \
$(WM_PROJECT_DIR)/src/OpenFOAM/lnInclude/Identity.H \
$(WM_PROJECT_DIR)/src/OpenFOAM/lnInclude/symmTensor.H \
$(WM_PROJECT_DIR)/src/OpenFOAM/lnInclude/SymmTensor.H \
$(WM_PROJECT_DIR)/src/OpenFOAM/lnInclude/SymmTensorI.H \
$(WM_PROJECT_DIR)/src/OpenFOAM/lnInclude/Tensor.H \
$(WM_PROJECT_DIR)/src/OpenFOAM/lnInclude/MatrixSpace.H \
$(WM_PROJECT_DIR)/src/OpenFOAM/lnInclude/MatrixSpaceI.H \
$(WM_PROJECT_DIR)/src/OpenFOAM/lnInclude/TensorI.H \
$(WM_PROJECT_DIR)/src/OpenFOAM/lnInclude/tensor.H \
$(WM_PROJECT_DIR)/src/OpenFOAM/lnInclude/triad.H \
$(WM_PROJECT_DIR)/src/OpenFOAM/lnInclude/triadI.H \
$(WM_PROJECT_DIR)/src/OpenFOAM/lnInclude/macros.H \
$(WM_PROJECT_DIR)/src/OpenFOAM/lnInclude/FieldM.H \
$(WM_PROJECT_DIR)/src/OpenFOAM/lnInclude/FieldFunctions.C \
$(WM_PROJECT_DIR)/src/OpenFOAM/lnInclude/FieldReuseFunctions.H \
$(WM_PROJECT_DIR)/src/OpenFOAM/lnInclude/FieldFunctionsM.C \
$(WM_PROJECT_DIR)/src/OpenFOAM/lnInclude/dimensionSets.H \
$(WM_PROJECT_DIR)/src/OpenFOAM/lnInclude/scalarMatrices.H \
$(WM_PROJECT_DIR)/src/OpenFOAM/lnInclude/RectangularMatrix.H \
$(WM_PROJECT_DIR)/src/OpenFOAM/lnInclude/Matrix.H \
$(WM_PROJECT_DIR)/src/OpenFOAM/lnInclude/complex.H \
$(WM_PROJECT_DIR)/src/OpenFOAM/lnInclude/complexI.H \
$(WM_PROJECT_DIR)/src/OpenFOAM/lnInclude/MatrixI.H \
$(WM_PROJECT_DIR)/src/OpenFOAM/lnInclude/MatrixBlock.H \
$(WM_PROJECT_DIR)/src/OpenFOAM/lnInclude/MatrixBlockI.H \
$(WM_PROJECT_DIR)/src/OpenFOAM/lnInclude/MatrixBlock.C \
$(WM_PROJECT_DIR)/src/OpenFOAM/lnInclude/Matrix.C \
$(WM_PROJECT_DIR)/src/OpenFOAM/lnInclude/MatrixIO.C \
$(WM_PROJECT_DIR)/src/OpenFOAM/lnInclude/SquareMatrix.H \
$(WM_PROJECT_DIR)/src/OpenFOAM/lnInclude/SquareMatrixI.H \
$(WM_PROJECT_DIR)/src/OpenFOAM/lnInclude/SquareMatrix.C \
$(WM_PROJECT_DIR)/src/OpenFOAM/lnInclude/RectangularMatrixI.H \
$(WM_PROJECT_DIR)/src/OpenFOAM/lnInclude/SymmetricSquareMatrix.H \
$(WM_PROJECT_DIR)/src/OpenFOAM/lnInclude/SymmetricSquareMatrixI.H \
$(WM_PROJECT_DIR)/src/OpenFOAM/lnInclude/SymmetricSquareMatrix.C \
$(WM_PROJECT_DIR)/src/OpenFOAM/lnInclude/DiagonalMatrix.H \
$(WM_PROJECT_DIR)/src/OpenFOAM/lnInclude/DiagonalMatrix.C \
$(WM_PROJECT_DIR)/src/OpenFOAM/lnInclude/scalarMatricesTemplates.C \
$(WM_PROJECT_DIR)/src/OpenFOAM/lnInclude/dimensionedType.C \
$(WM_PROJECT_DIR)/src/OpenFOAM/lnInclude/TimeStateI.H \
$(WM_PROJECT_DIR)/src/OpenFOAM/lnInclude/dlLibraryTable.H \
$(WM_PROJECT_DIR)/src/OpenFOAM/lnInclude/dlLibraryTableTemplates.C \
$(WM_PROJECT_DIR)/src/OpenFOAM/lnInclude/functionObjectList.H \
$(WM_PROJECT_DIR)/src/OpenFOAM/lnInclude/functionObject.H \
$(WM_PROJECT_DIR)/src/OpenFOAM/lnInclude/SHA1Digest.H \
$(WM_PROJECT_DIR)/src/OpenFOAM/lnInclude/IOdictionary.H \
$(WM_PROJECT_DIR)/src/OSspecific/POSIX/lnInclude/sigWriteNow.H \
$(WM_PROJECT_DIR)/src/OSspecific/POSIX/lnInclude/sigStopAtWriteNow.H \
$(WM_PROJECT_DIR)/src/finiteVolume/lnInclude/fvMesh.H \
$(WM_PROJECT_DIR)/src/OpenFOAM/lnInclude/polyMesh.H \
$(WM_PROJECT_DIR)/src/OpenFOAM/lnInclude/primitiveMesh.H \
$(WM_PROJECT_DIR)/src/OpenFOAM/lnInclude/edgeList.H \
$(WM_PROJECT_DIR)/src/OpenFOAM/lnInclude/edge.H \
$(WM_PROJECT_DIR)/src/OpenFOAM/lnInclude/linePointRef.H \
$(WM_PROJECT_DIR)/src/OpenFOAM/lnInclude/point.H \
$(WM_PROJECT_DIR)/src/OpenFOAM/lnInclude/line.H \
$(WM_PROJECT_DIR)/src/OpenFOAM/lnInclude/PointHit.H \
$(WM_PROJECT_DIR)/src/OpenFOAM/lnInclude/point2D.H \
$(WM_PROJECT_DIR)/src/OpenFOAM/lnInclude/lineI.H \
$(WM_PROJECT_DIR)/src/OpenFOAM/lnInclude/pointField.H \
$(WM_PROJECT_DIR)/src/OpenFOAM/lnInclude/primitiveFields.H \
$(WM_PROJECT_DIR)/src/OpenFOAM/lnInclude/labelField.H \
$(WM_PROJECT_DIR)/src/OpenFOAM/lnInclude/vectorField.H \
$(WM_PROJECT_DIR)/src/OpenFOAM/lnInclude/tensorField.H \
$(WM_PROJECT_DIR)/src/OpenFOAM/lnInclude/sphericalTensorField.H \
$(WM_PROJECT_DIR)/src/OpenFOAM/lnInclude/symmTensorField.H \
$(WM_PROJECT_DIR)/src/OpenFOAM/lnInclude/pointFieldFwd.H \
$(WM_PROJECT_DIR)/src/OpenFOAM/lnInclude/primitiveFieldsFwd.H \
$(WM_PROJECT_DIR)/src/OpenFOAM/lnInclude/edgeI.H \
$(WM_PROJECT_DIR)/src/OpenFOAM/lnInclude/faceList.H \
$(WM_PROJECT_DIR)/src/OpenFOAM/lnInclude/face.H \
$(WM_PROJECT_DIR)/src/OpenFOAM/lnInclude/faceListFwd.H \
$(WM_PROJECT_DIR)/src/OpenFOAM/lnInclude/intersection.H \
$(WM_PROJECT_DIR)/src/OpenFOAM/lnInclude/pointHit.H \
$(WM_PROJECT_DIR)/src/OpenFOAM/lnInclude/ListListOps.H \
$(WM_PROJECT_DIR)/src/OpenFOAM/lnInclude/ListListOps.C \
$(WM_PROJECT_DIR)/src/OpenFOAM/lnInclude/faceI.H \
$(WM_PROJECT_DIR)/src/OpenFOAM/lnInclude/faceTemplates.C \
$(WM_PROJECT_DIR)/src/OpenFOAM/lnInclude/cellList.H \
$(WM_PROJECT_DIR)/src/OpenFOAM/lnInclude/cell.H \
$(WM_PROJECT_DIR)/src/OpenFOAM/lnInclude/oppositeFace.H \
$(WM_PROJECT_DIR)/src/OpenFOAM/lnInclude/cellI.H \
$(WM_PROJECT_DIR)/src/OpenFOAM/lnInclude/cellListFwd.H \
$(WM_PROJECT_DIR)/src/OpenFOAM/lnInclude/cellShapeList.H \
$(WM_PROJECT_DIR)/src/OpenFOAM/lnInclude/cellShape.H \
$(WM_PROJECT_DIR)/src/OpenFOAM/lnInclude/cellModel.H \
$(WM_PROJECT_DIR)/src/OpenFOAM/lnInclude/cellModelI.H \
$(WM_PROJECT_DIR)/src/OpenFOAM/lnInclude/cellShapeI.H \
$(WM_PROJECT_DIR)/src/OpenFOAM/lnInclude/primitiveMeshI.H \
$(WM_PROJECT_DIR)/src/OpenFOAM/lnInclude/pointIOField.H \
$(WM_PROJECT_DIR)/src/OpenFOAM/lnInclude/vectorIOField.H \
$(WM_PROJECT_DIR)/src/OpenFOAM/lnInclude/IOField.H \
$(WM_PROJECT_DIR)/src/OpenFOAM/lnInclude/IOField.C \
$(WM_PROJECT_DIR)/src/OpenFOAM/lnInclude/faceIOList.H \
$(WM_PROJECT_DIR)/src/OpenFOAM/lnInclude/CompactIOList.H \
$(WM_PROJECT_DIR)/src/OpenFOAM/lnInclude/IOList.H \
$(WM_PROJECT_DIR)/src/OpenFOAM/lnInclude/IOList.C \
$(WM_PROJECT_DIR)/src/OpenFOAM/lnInclude/CompactIOList.C \
$(WM_PROJECT_DIR)/src/OpenFOAM/lnInclude/labelIOList.H \
$(WM_PROJECT_DIR)/src/OpenFOAM/lnInclude/polyBoundaryMesh.H \
$(WM_PROJECT_DIR)/src/OpenFOAM/lnInclude/polyPatchList.H \
$(WM_PROJECT_DIR)/src/OpenFOAM/lnInclude/polyPatch.H \
$(WM_PROJECT_DIR)/src/OpenFOAM/lnInclude/patchIdentifier.H \
$(WM_PROJECT_DIR)/src/OpenFOAM/lnInclude/primitivePatch.H \
$(WM_PROJECT_DIR)/src/OpenFOAM/lnInclude/PrimitivePatch.H \
$(WM_PROJECT_DIR)/src/OpenFOAM/lnInclude/objectHit.H \
$(WM_PROJECT_DIR)/src/OpenFOAM/lnInclude/PrimitivePatch.C \
$(WM_PROJECT_DIR)/src/OpenFOAM/lnInclude/PrimitivePatchAddressing.C \
$(WM_PROJECT_DIR)/src/OpenFOAM/lnInclude/PrimitivePatchEdgeLoops.C \
$(WM_PROJECT_DIR)/src/OpenFOAM/lnInclude/PrimitivePatchClear.C \
$(WM_PROJECT_DIR)/src/OpenFOAM/lnInclude/demandDrivenData.H \
$(WM_PROJECT_DIR)/src/OpenFOAM/lnInclude/PrimitivePatchBdryPoints.C \
$(WM_PROJECT_DIR)/src/OpenFOAM/lnInclude/PrimitivePatchLocalPointOrder.C \
$(WM_PROJECT_DIR)/src/OpenFOAM/lnInclude/PrimitivePatchMeshData.C \
$(WM_PROJECT_DIR)/src/OpenFOAM/lnInclude/PrimitivePatchMeshEdges.C \
$(WM_PROJECT_DIR)/src/OpenFOAM/lnInclude/PrimitivePatchPointAddressing.C \
$(WM_PROJECT_DIR)/src/OpenFOAM/lnInclude/PrimitivePatchProjectPoints.C \
$(WM_PROJECT_DIR)/src/OpenFOAM/lnInclude/bandCompression.H \
$(WM_PROJECT_DIR)/src/OpenFOAM/lnInclude/PrimitivePatchCheck.C \
$(WM_PROJECT_DIR)/src/OpenFOAM/lnInclude/polyBoundaryMeshTemplates.C \
$(WM_PROJECT_DIR)/src/OpenFOAM/lnInclude/boundBox.H \
$(WM_PROJECT_DIR)/src/OpenFOAM/lnInclude/boundBoxI.H \
$(WM_PROJECT_DIR)/src/OpenFOAM/lnInclude/boundBoxTemplates.C \
$(WM_PROJECT_DIR)/src/OpenFOAM/lnInclude/pointZoneMesh.H \
$(WM_PROJECT_DIR)/src/OpenFOAM/lnInclude/ZoneMesh.H \
$(WM_PROJECT_DIR)/src/OpenFOAM/lnInclude/ZoneMesh.C \
$(WM_PROJECT_DIR)/src/OpenFOAM/lnInclude/pointZone.H \
$(WM_PROJECT_DIR)/src/OpenFOAM/lnInclude/zone.H \
$(WM_PROJECT_DIR)/src/OpenFOAM/lnInclude/pointZoneMeshFwd.H \
$(WM_PROJECT_DIR)/src/OpenFOAM/lnInclude/faceZoneMesh.H \
$(WM_PROJECT_DIR)/src/OpenFOAM/lnInclude/faceZone.H \
$(WM_PROJECT_DIR)/src/OpenFOAM/lnInclude/faceZoneMeshFwd.H \
$(WM_PROJECT_DIR)/src/OpenFOAM/lnInclude/primitiveFacePatch.H \
$(WM_PROJECT_DIR)/src/OpenFOAM/lnInclude/cellZoneMesh.H \
$(WM_PROJECT_DIR)/src/OpenFOAM/lnInclude/cellZone.H \
$(WM_PROJECT_DIR)/src/OpenFOAM/lnInclude/cellZoneMeshFwd.H \
$(WM_PROJECT_DIR)/src/OpenFOAM/lnInclude/lduMesh.H \
$(WM_PROJECT_DIR)/src/OpenFOAM/lnInclude/lduAddressing.H \
$(WM_PROJECT_DIR)/src/OpenFOAM/lnInclude/lduSchedule.H \
$(WM_PROJECT_DIR)/src/OpenFOAM/lnInclude/lduInterfacePtrsList.H \
$(WM_PROJECT_DIR)/src/OpenFOAM/lnInclude/lduInterface.H \
$(WM_PROJECT_DIR)/src/OpenFOAM/lnInclude/lduMeshTemplates.C \
$(WM_PROJECT_DIR)/src/finiteVolume/lnInclude/fvBoundaryMesh.H \
$(WM_PROJECT_DIR)/src/finiteVolume/lnInclude/fvPatchList.H \
$(WM_PROJECT_DIR)/src/finiteVolume/lnInclude/fvPatch.H \
$(WM_PROJECT_DIR)/src/OpenFOAM/lnInclude/SubField.H \
$(WM_PROJECT_DIR)/src/OpenFOAM/lnInclude/SubFieldI.H \
$(WM_PROJECT_DIR)/src/finiteVolume/lnInclude/fvPatchFieldsFwd.H \
$(WM_PROJECT_DIR)/src/finiteVolume/lnInclude/fvPatchTemplates.C \
$(WM_PROJECT_DIR)/src/finiteVolume/lnInclude/surfaceInterpolation.H \
$(WM_PROJECT_DIR)/src/finiteVolume/lnInclude/volFieldsFwd.H \
$(WM_PROJECT_DIR)/src/finiteVolume/lnInclude/surfaceFieldsFwd.H \
$(WM_PROJECT_DIR)/src/finiteVolume/lnInclude/fvSchemes.H \
$(WM_PROJECT_DIR)/src/finiteVolume/lnInclude/fvSolution.H \
$(WM_PROJECT_DIR)/src/OpenFOAM/lnInclude/solution.H \
$(WM_PROJECT_DIR)/src/OpenFOAM/lnInclude/solutionTemplates.C \
$(WM_PROJECT_DIR)/src/OpenFOAM/lnInclude/data.H \
$(WM_PROJECT_DIR)/src/OpenFOAM/lnInclude/solverPerformance.H \
$(WM_PROJECT_DIR)/src/OpenFOAM/lnInclude/SolverPerformance.H \
$(WM_PROJECT_DIR)/src/OpenFOAM/lnInclude/SolverPerformance.C \
$(WM_PROJECT_DIR)/src/OpenFOAM/lnInclude/dataTemplates.C \
$(WM_PROJECT_DIR)/src/OpenFOAM/lnInclude/DimensionedField.H \
$(WM_PROJECT_DIR)/src/OpenFOAM/lnInclude/orientedType.H \
$(WM_PROJECT_DIR)/src/OpenFOAM/lnInclude/DimensionedFieldI.H \
$(WM_PROJECT_DIR)/src/OpenFOAM/lnInclude/DimensionedFieldFunctions.H \
$(WM_PROJECT_DIR)/src/OpenFOAM/lnInclude/DimensionedScalarField.H \
$(WM_PROJECT_DIR)/src/OpenFOAM/lnInclude/DimensionedFieldFunctionsM.H \
$(WM_PROJECT_DIR)/src/OpenFOAM/lnInclude/DimensionedScalarField.C \
$(WM_PROJECT_DIR)/src/OpenFOAM/lnInclude/DimensionedFieldFunctionsM.C \
$(WM_PROJECT_DIR)/src/OpenFOAM/lnInclude/DimensionedFieldReuseFunctions.H \
$(WM_PROJECT_DIR)/src/OpenFOAM/lnInclude/DimensionedField.C \
$(WM_PROJECT_DIR)/src/OpenFOAM/lnInclude/DimensionedFieldIO.C \
$(WM_PROJECT_DIR)/src/OpenFOAM/lnInclude/DimensionedFieldFunctions.C \
$(WM_PROJECT_DIR)/src/OpenFOAM/lnInclude/pointFieldsFwd.H \
$(WM_PROJECT_DIR)/src/finiteVolume/lnInclude/slicedVolFieldsFwd.H \
$(WM_PROJECT_DIR)/src/finiteVolume/lnInclude/slicedSurfaceFieldsFwd.H \
$(WM_PROJECT_DIR)/src/finiteVolume/lnInclude/fvMeshTemplates.C \
$(WM_PROJECT_DIR)/src/finiteVolume/lnInclude/fvPatchFvMeshTemplates.C \
$(WM_PROJECT_DIR)/src/meshTools/lnInclude/topoSetSource.H \
$(WM_PROJECT_DIR)/src/meshTools/lnInclude/cellSet.H \
$(WM_PROJECT_DIR)/src/meshTools/lnInclude/topoSet.H \
$(WM_PROJECT_DIR)/src/meshTools/lnInclude/topoSetTemplates.C \
$(WM_PROJECT_DIR)/src/meshTools/lnInclude/faceSet.H \
$(WM_PROJECT_DIR)/src/finiteVolume/lnInclude/volFields.H \
$(WM_PROJECT_DIR)/src/OpenFOAM/lnInclude/GeometricFields.H \
$(WM_PROJECT_DIR)/src/OpenFOAM/lnInclude/GeometricScalarField.H \
$(WM_PROJECT_DIR)/src/OpenFOAM/lnInclude/GeometricField.H \
$(WM_PROJECT_DIR)/src/OpenFOAM/lnInclude/dimensionedTypes.H \
$(WM_PROJECT_DIR)/src/OpenFOAM/lnInclude/dimensionedVector.H \
$(WM_PROJECT_DIR)/src/OpenFOAM/lnInclude/dimensionedSphericalTensor.H \
$(WM_PROJECT_DIR)/src/OpenFOAM/lnInclude/dimensionedSymmTensor.H \
$(WM_PROJECT_DIR)/src/OpenFOAM/lnInclude/dimensionedTensor.H \
$(WM_PROJECT_DIR)/src/OpenFOAM/lnInclude/dimensionedMinMax.H \
$(WM_PROJECT_DIR)/src/OpenFOAM/lnInclude/dimensionedMinMaxTemplates.C \
$(WM_PROJECT_DIR)/src/OpenFOAM/lnInclude/FieldField.H \
$(WM_PROJECT_DIR)/src/OpenFOAM/lnInclude/FieldFieldFunctions.H \
$(WM_PROJECT_DIR)/src/OpenFOAM/lnInclude/scalarFieldField.H \
$(WM_PROJECT_DIR)/src/OpenFOAM/lnInclude/FieldFieldFunctionsM.H \
$(WM_PROJECT_DIR)/src/OpenFOAM/lnInclude/scalarFieldField.C \
$(WM_PROJECT_DIR)/src/OpenFOAM/lnInclude/FieldFieldFunctionsM.C \
$(WM_PROJECT_DIR)/src/OpenFOAM/lnInclude/FieldFieldReuseFunctions.H \
$(WM_PROJECT_DIR)/src/OpenFOAM/lnInclude/FieldField.C \
$(WM_PROJECT_DIR)/src/OpenFOAM/lnInclude/FieldFieldFunctions.C \
$(WM_PROJECT_DIR)/src/OpenFOAM/lnInclude/lduInterfaceFieldPtrsList.H \
$(WM_PROJECT_DIR)/src/OpenFOAM/lnInclude/lduInterfaceField.H \
$(WM_PROJECT_DIR)/src/OpenFOAM/lnInclude/lduInterfaceFieldTemplates.C \
$(WM_PROJECT_DIR)/src/OpenFOAM/lnInclude/LduInterfaceFieldPtrsList.H \
$(WM_PROJECT_DIR)/src/OpenFOAM/lnInclude/LduInterfaceField.H \
$(WM_PROJECT_DIR)/src/OpenFOAM/lnInclude/LduInterfaceField.C \
$(WM_PROJECT_DIR)/src/OpenFOAM/lnInclude/GeometricFieldI.H \
$(WM_PROJECT_DIR)/src/OpenFOAM/lnInclude/GeometricField.C \
$(WM_PROJECT_DIR)/src/OpenFOAM/lnInclude/localIOdictionary.H \
$(WM_PROJECT_DIR)/src/OpenFOAM/lnInclude/GeometricBoundaryField.C \
$(WM_PROJECT_DIR)/src/OpenFOAM/lnInclude/emptyPolyPatch.H \
$(WM_PROJECT_DIR)/src/OpenFOAM/lnInclude/commSchedule.H \
$(WM_PROJECT_DIR)/src/OpenFOAM/lnInclude/globalMeshData.H \
$(WM_PROJECT_DIR)/src/OpenFOAM/lnInclude/processorTopology.H \
$(WM_PROJECT_DIR)/src/OpenFOAM/lnInclude/ProcessorTopology.H \
$(WM_PROJECT_DIR)/src/OpenFOAM/lnInclude/ProcessorTopology.C \
$(WM_PROJECT_DIR)/src/OpenFOAM/lnInclude/processorPolyPatch.H \
$(WM_PROJECT_DIR)/src/OpenFOAM/lnInclude/coupledPolyPatch.H \
$(WM_PROJECT_DIR)/src/OpenFOAM/lnInclude/diagTensorField.H \
$(WM_PROJECT_DIR)/src/OpenFOAM/lnInclude/diagTensor.H \
$(WM_PROJECT_DIR)/src/OpenFOAM/lnInclude/DiagTensor.H \
$(WM_PROJECT_DIR)/src/OpenFOAM/lnInclude/DiagTensorI.H \
$(WM_PROJECT_DIR)/src/OpenFOAM/lnInclude/indirectPrimitivePatch.H \
$(WM_PROJECT_DIR)/src/OpenFOAM/lnInclude/globalMeshDataTemplates.C \
$(WM_PROJECT_DIR)/src/OpenFOAM/lnInclude/mapDistribute.H \
$(WM_PROJECT_DIR)/src/OpenFOAM/lnInclude/transformList.H \
$(WM_PROJECT_DIR)/src/OpenFOAM/lnInclude/transform.H \
$(WM_PROJECT_DIR)/src/OpenFOAM/lnInclude/mathematicalConstants.H \
$(WM_PROJECT_DIR)/src/OpenFOAM/lnInclude/edgeHashes.H \
$(WM_PROJECT_DIR)/src/OpenFOAM/lnInclude/EdgeMap.H \
$(WM_PROJECT_DIR)/src/OpenFOAM/lnInclude/transformList.C \
$(WM_PROJECT_DIR)/src/OpenFOAM/lnInclude/vectorTensorTransform.H \
$(WM_PROJECT_DIR)/src/OpenFOAM/lnInclude/vectorTensorTransformI.H \
$(WM_PROJECT_DIR)/src/OpenFOAM/lnInclude/vectorTensorTransformTemplates.C \
$(WM_PROJECT_DIR)/src/OpenFOAM/lnInclude/mapDistributeTemplates.C \
$(WM_PROJECT_DIR)/src/OpenFOAM/lnInclude/globalIndexAndTransform.H \
$(WM_PROJECT_DIR)/src/OpenFOAM/lnInclude/globalIndexAndTransformI.H \
$(WM_PROJECT_DIR)/src/OpenFOAM/lnInclude/transformField.H \
$(WM_PROJECT_DIR)/src/OpenFOAM/lnInclude/quaternion.H \
$(WM_PROJECT_DIR)/src/OpenFOAM/lnInclude/quaternionI.H \
$(WM_PROJECT_DIR)/src/OpenFOAM/lnInclude/septernion.H \
$(WM_PROJECT_DIR)/src/OpenFOAM/lnInclude/spatialTransform.H \
$(WM_PROJECT_DIR)/src/OpenFOAM/lnInclude/spatialVector.H \
$(WM_PROJECT_DIR)/src/OpenFOAM/lnInclude/SpatialVector.H \
$(WM_PROJECT_DIR)/src/OpenFOAM/lnInclude/SpatialVectorI.H \
$(WM_PROJECT_DIR)/src/OpenFOAM/lnInclude/spatialTensor.H \
$(WM_PROJECT_DIR)/src/OpenFOAM/lnInclude/SpatialTensor.H \
$(WM_PROJECT_DIR)/src/OpenFOAM/lnInclude/SpatialTensorI.H \
$(WM_PROJECT_DIR)/src/OpenFOAM/lnInclude/spatialTransformI.H \
$(WM_PROJECT_DIR)/src/OpenFOAM/lnInclude/septernionI.H \
$(WM_PROJECT_DIR)/src/OpenFOAM/lnInclude/transformFieldTemplates.C \
$(WM_PROJECT_DIR)/src/OpenFOAM/lnInclude/cyclicPolyPatch.H \
$(WM_PROJECT_DIR)/src/OpenFOAM/lnInclude/coupleGroupIdentifier.H \
$(WM_PROJECT_DIR)/src/OpenFOAM/lnInclude/coupleGroupIdentifierI.H \
$(WM_PROJECT_DIR)/src/OpenFOAM/lnInclude/GeometricFieldFunctions.C \
$(WM_PROJECT_DIR)/src/OpenFOAM/lnInclude/GeometricFieldReuseFunctions.H \
$(WM_PROJECT_DIR)/src/OpenFOAM/lnInclude/GeometricFieldFunctionsM.C \
$(WM_PROJECT_DIR)/src/OpenFOAM/lnInclude/GeometricFieldFunctions.H \
$(WM_PROJECT_DIR)/src/OpenFOAM/lnInclude/GeometricFieldFunctionsM.H \
$(WM_PROJECT_DIR)/src/OpenFOAM/lnInclude/GeometricScalarField.C \
$(WM_PROJECT_DIR)/src/OpenFOAM/lnInclude/GeometricTensorField.H \
$(WM_PROJECT_DIR)/src/OpenFOAM/lnInclude/GeometricSphericalTensorField.H \
$(WM_PROJECT_DIR)/src/OpenFOAM/lnInclude/GeometricSphericalTensorField.C \
$(WM_PROJECT_DIR)/src/OpenFOAM/lnInclude/GeometricSymmTensorField.H \
$(WM_PROJECT_DIR)/src/OpenFOAM/lnInclude/DimensionedSymmTensorField.H \
$(WM_PROJECT_DIR)/src/OpenFOAM/lnInclude/DimensionedSymmTensorField.C \
$(WM_PROJECT_DIR)/src/OpenFOAM/lnInclude/GeometricSymmTensorField.C \
$(WM_PROJECT_DIR)/src/OpenFOAM/lnInclude/symmTensorFieldField.H \
$(WM_PROJECT_DIR)/src/OpenFOAM/lnInclude/symmTensorFieldField.C \
$(WM_PROJECT_DIR)/src/OpenFOAM/lnInclude/DimensionedTensorField.H \
$(WM_PROJECT_DIR)/src/OpenFOAM/lnInclude/DimensionedSphericalTensorField.H \
$(WM_PROJECT_DIR)/src/OpenFOAM/lnInclude/DimensionedSphericalTensorField.C \
$(WM_PROJECT_DIR)/src/OpenFOAM/lnInclude/DimensionedTensorField.C \
$(WM_PROJECT_DIR)/src/OpenFOAM/lnInclude/GeometricTensorField.C \
$(WM_PROJECT_DIR)/src/OpenFOAM/lnInclude/tensorFieldField.H \
$(WM_PROJECT_DIR)/src/OpenFOAM/lnInclude/sphericalTensorFieldField.H \
$(WM_PROJECT_DIR)/src/OpenFOAM/lnInclude/sphericalTensorFieldField.C \
$(WM_PROJECT_DIR)/src/OpenFOAM/lnInclude/tensorFieldField.C \
$(WM_PROJECT_DIR)/src/finiteVolume/lnInclude/volMesh.H \
$(WM_PROJECT_DIR)/src/OpenFOAM/lnInclude/GeoMesh.H \
$(WM_PROJECT_DIR)/src/finiteVolume/lnInclude/fvPatchField.H \
$(WM_PROJECT_DIR)/src/finiteVolume/lnInclude/fvPatchField.C \
$(WM_PROJECT_DIR)/src/finiteVolume/lnInclude/fvPatchFieldMapper.H \
$(WM_PROJECT_DIR)/src/finiteVolume/lnInclude/fvPatchFieldNew.C \
$(WM_PROJECT_DIR)/src/finiteVolume/lnInclude/calculatedFvPatchField.H \
$(WM_PROJECT_DIR)/src/finiteVolume/lnInclude/calculatedFvPatchField.C \
$(WM_PROJECT_DIR)/src/finiteVolume/lnInclude/calculatedFvPatchFields.H \
$(WM_PROJECT_DIR)/src/finiteVolume/lnInclude/volFieldsI.H \
$(WM_PROJECT_DIR)/src/OpenFOAM/lnInclude/addRegionOption.H \
$(WM_PROJECT_DIR)/src/OpenFOAM/lnInclude/setRootCase.H \
$(WM_PROJECT_DIR)/src/OpenFOAM/lnInclude/foamDlOpenLibs.H \
$(WM_PROJECT_DIR)/src/OpenFOAM/lnInclude/createTime.H \
$(WM_PROJECT_DIR)/src/OpenFOAM/lnInclude/createNamedMesh.H \
$(WM_PROJECT_DIR)/src/OpenFOAM/lnInclude/setSystemMeshDictionaryIO.H \
