# Supplementary material for: ISWFoam: A numerical model for internal solitary wave simulation in continuously stratified fluids
Source: Copernicus journal article supplement (doi:10.5194/gmd-2021-102), 2021-05-27
Supplement: Supplementary file 2 [file gmd-2021-102-supplement.zip › ISWFoam/tutorial/FlatBottom-DJLES/0.orig/epsilon]

/*--------------------------------*- C++ -*----------------------------------*\
| =========                 |                                                 |
| \\      /  F ield         | OpenFOAM: The Open Source CFD Toolbox           |
|  \\    /   O peration     | Version:  2.1.0                                 |
|   \\  /    A nd           | Web:      www.OpenFOAM.org                      |
|    \\/     M anipulation  |                                                 |
\*---------------------------------------------------------------------------*/
FoamFile
{
    version     2.0;
    format      ascii;
    class       volScalarField;
    object      epsilon;
}
// * * * * * * * * * * * * * * * * * * * * * * * * * * * * * * * * * * * * * //

dimensions      [0 2 -3 0 0 0 0];

internalField   uniform 0.000001;

boundaryField
{
    inlet
    {
        type            cyclic;
    }
    outlet
    {
        type            cyclic;
    }
    ground
    {
        type            epsilonWallFunction;
        value           uniform 0.000001;
    }

    front
    {
	    type            empty;
    }
    back
    {
	    type            empty;
    }

    top
    {
        type            epsilonWallFunction;
        value           uniform 0.000001;
    }
}


// ************************************************************************* //
