# Supplementary material for: ISWFoam: A numerical model for internal solitary wave simulation in continuously stratified fluids
Source: Copernicus journal article supplement (doi:10.5194/gmd-2021-102), 2021-05-27
Supplement: Supplementary file 2 [file gmd-2021-102-supplement.zip › ISWFoam/tutorial/FlatBottom-DJLES/0.orig/initialFieldsRho]

densityProfile
List<scalar>
150000
(
1030.000000
1030.000000
1030.000000
1030.000000
1030.000000
1030.000000
1030.000000
1030.000000
1030.000000
1030.000000
1030.000000
1030.000000
1030.000000
1030.000000
1030.000000
1030.000000
1030.000000
1030.000000
1030.000000
1030.000000
1030.000000
1030.000000
1030.000000
1030.000000
1030.000000
1030.000000
1030.000000
1030.000000
1030.000000
1030.000000
1030.000000
1030.000000
1030.000000
1030.000000
1030.000000
1030.000000
1030.000000
1030.000000
1030.000000
1030.000000
1030.000000
1030.000000
1030.000000
1030.000000
1030.000000
1030.000000
1030.000000
1030.000000
1030.000000
1030.000000
1030.000000
1030.000000
1030.000000
1030.000000
1030.000000
1030.000000
1030.000000
1030.000000
1030.000000
1030.000000
1030.000000
1030.000000
1030.000000
1030.000000
1030.000000
1030.000000
1030.000000
1030.000000
1030.000000
1030.000000
1030.000000
1030.000000
1030.000000
1030.000000
1030.000000
1030.000000
1030.000000
1030.000000
1030.000000
1030.000000
1030.000000
1030.000000
1030.000000
1030.000000
1030.000000
1030.000000
1030.000000
1030.000000
1030.000000
1030.000000
1030.000000
1030.000000
1030.000000
1030.000000
1030.000000
1030.000000
1030.000000
1030.000000
1030.000000
1030.000000
1030.000000
1030.000000
1030.000000
1030.000000
1030.000000
1030.000000
1030.000000
1030.000000
1030.000000
1030.000000
1030.000000
1030.000000
1030.000000
1030.000000
1030.000000
1030.000000
1030.000000
1030.000000
1030.000000
1030.000000
1030.000000
1030.000000
1030.000000
1030.000000
1030.000000
1030.000000
1030.000000
1030.000000
1030.000000
1030.000000
1030.000000
1030.000000
1030.000000
1030.000000
1030.000000
1030.000000
1030.000000
1030.000000
1030.000000
1030.000000
1030.000000
1030.000000
1030.000000
1030.000000
1030.000000
1030.000000
1030.000000
1030.000000
1030.000000
1030.000000
1030.000000
1030.000000
1030.000000
1030.000000
1030.000000
1030.000000
1030.000000
1030.000000
1030.000000
1030.000000
1030.000000
1030.000000
1030.000000
1030.000000
1030.000000
1030.000000
1030.000000
1030.000000
1030.000000
1030.000000
1030.000000
1030.000000
1030.000000
1030.000000
1030.000000
1030.000000
1030.000000
1030.000000
1030.000000
1030.000000
1030.000000
1030.000000
1030.000000
1030.000000
1030.000000
1030.000000
1030.000000
1030.000000
1030.000000
1030.000000
1030.000000
1030.000000
1030.000000
1030.000000
1030.000000
1030.000000
1030.000000
1030.000000
1030.000000
1030.000000
1030.000000
1030.000000
1030.000000
1030.000000
1030.000000
1030.000000
1030.000000
1030.000000
1030.000000
1030.000000
1030.000000
1030.000000
1030.000000
1030.000000
1030.000000
1030.000000
1030.000000
1030.000000
1030.000000
1030.000000
1030.000000
1030.000000
1030.000000
1030.000000
1030.000000
1030.000000
1030.000000
1030.000000
1030.000000
1030.000000
1030.000000
1030.000000
1030.000000
1030.000000
1030.000000
1030.000000
1030.000000
1030.000000
1030.000000
1030.000000
1030.000000
1030.000000
1030.000000
1030.000000
1030.000000
1030.000000
1030.000000
1030.000000
1030.000000
1030.000000
1030.000000
1030.000000
1030.000000
1030.000000
1030.000000
1030.000000
1030.000000
1030.000000
1030.000000
1030.000000
1030.000000
1030.000000
1030.000000
1030.000000
1030.000000
1030.000000
1030.000000
1030.000000
1030.000000
1030.000000
1030.000000
1030.000000
1030.000000
1030.000000
1030.000000
1030.000000
1030.000000
1030.000000
1030.000000
1030.000000
1030.000000
1030.000000
1030.000000
1030.000000
1030.000000
1030.000000
1030.000000
1030.000000
1030.000000
1030.000000
1030.000000
1030.000000
1030.000000
1030.000000
1030.000000
1030.000000
1030.000000
1030.000000
1030.000000
1030.000000
1030.000000
1030.000000
1030.000000
1030.000000
1030.000000
1030.000000
1030.000000
1030.000000
1030.000000
1030.000000
1030.000000
1030.000000
1030.000000
1030.000000
1030.000000
1030.000000
1030.000000
1030.000000
1030.000000
1030.000000
1030.000000
1030.000000
1030.000000
1030.000000
1030.000000
1030.000000
1030.000000
1030.000000
1030.000000
1030.000000
1030.000000
1030.000000
1030.000000
1030.000000
1030.000000
1030.000000
1030.000000
1030.000000
1030.000000
1030.000000
1030.000000
1030.000000
1030.000000
1030.000000
1030.000000
1030.000000
1030.000000
1030.000000
1030.000000
1030.000000
1030.000000
1030.000000
1030.000000
1030.000000
1030.000000
1030.000000
1030.000000
1030.000000
1030.000000
1030.000000
1030.000000
1030.000000
1030.000000
1030.000000
1030.000000
1030.000000
1030.000000
1030.000000
1030.000000
1030.000000
1030.000000
1030.000000
1030.000000
1030.000000
1030.000000
1030.000000
1030.000000
1030.000000
1030.000000
1030.000000
1030.000000
1030.000000
1030.000000
1030.000000
1030.000000
1030.000000
1030.000000
1030.000000
1030.000000
1030.000000
1030.000000
1030.000000
1030.000000
1030.000000
1030.000000
1030.000000
1030.000000
1030.000000
1030.000000
1030.000000
1030.000000
1030.000000
1030.000000
1030.000000
1030.000000
1030.000000
1030.000000
1030.000000
1030.000000
1030.000000
1030.000000
1030.000000
1030.000000
1030.000000
1030.000000
1030.000000
1030.000000
1030.000000
1030.000000
1030.000000
1030.000000
1030.000000
1030.000000
1030.000000
1030.000000
1030.000000
1030.000000
1030.000000
1030.000000
1030.000000
1030.000000
1030.000000
1030.000000
1030.000000
1030.000000
1030.000000
1030.000000
1030.000000
1030.000000
1030.000000
1030.000000
1030.000000
1030.000000
1030.000000
1030.000000
1030.000000
1030.000000
1030.000000
1030.000000
1030.000000
1030.000000
1030.000000
1030.000000
1030.000000
1030.000000
1030.000000
1030.000000
1030.000000
1030.000000
1030.000000
1030.000000
1030.000000
1030.000000
1030.000000
1030.000000
1030.000000
1030.000000
1030.000000
1030.000000
1030.000000
1030.000000
1030.000000
1030.000000
1030.000000
1030.000000
1030.000000
1030.000000
1030.000000
1030.000000
1030.000000
1030.000000
1030.000000
1030.000000
1030.000000
1030.000000
1030.000000
1030.000000
1030.000000
1030.000000
1030.000000
1030.000000
1030.000000
1030.000000
1030.000000
1030.000000
1030.000000
1030.000000
1030.000000
1030.000000
1030.000000
1030.000000
1030.000000
1030.000000
1030.000000
1030.000000
1030.000000
1030.000000
1030.000000
1030.000000
1030.000000
1030.000000
1030.000000
1030.000000
1030.000000
1030.000000
1030.000000
1030.000000
1030.000000
1030.000000
1030.000000
1030.000000
1030.000000
1030.000000
1030.000000
1030.000000
1030.000000
1030.000000
1030.000000
1030.000000
1030.000000
1030.000000
1030.000000
1030.000000
1030.000000
1030.000000
1030.000000
1030.000000
1030.000000
1030.000000
1030.000000
1030.000000
1030.000000
1030.000000
1030.000000
1030.000000
1030.000000
1030.000000
1030.000000
1030.000000
1030.000000
1030.000000
1030.000000
1030.000000
1030.000000
1030.000000
1030.000000
1030.000000
1030.000000
1030.000000
1030.000000
1030.000000
1030.000000
1030.000000
1030.000000
1030.000000
1030.000000
1030.000000
1030.000000
1030.000000
1030.000000
1030.000000
1030.000000
1030.000000
1030.000000
1030.000000
1030.000000
1030.000000
1030.000000
1030.000000
1030.000000
1030.000000
1030.000000
1030.000000
1030.000000
1030.000000
1030.000000
1030.000000
1030.000000
1030.000000
1030.000000
1030.000000
1030.000000
1030.000000
1030.000000
1030.000000
1030.000000
1030.000000
1030.000000
1030.000000
1030.000000
1030.000000
1030.000000
1030.000000
1030.000000
1030.000000
1030.000000
1030.000000
1030.000000
1030.000000
1030.000000
1030.000000
1030.000000
1030.000000
1030.000000
1030.000000
1030.000000
1030.000000
1030.000000
1030.000000
1030.000000
1030.000000
1030.000000
1030.000000
1030.000000
1030.000000
1030.000000
1030.000000
1030.000000
1030.000000
1030.000000
1030.000000
1030.000000
1030.000000
1030.000000
1030.000000
1030.000000
1030.000000
1030.000000
1030.000000
1030.000000
1030.000000
1030.000000
1030.000000
1030.000000
1030.000000
1030.000000
1030.000000
1030.000000
1030.000000
1030.000000
1030.000000
1030.000000
1030.000000
1030.000000
1030.000000
1030.000000
1030.000000
1030.000000
1030.000000
1030.000000
1030.000000
1030.000000
1030.000000
1030.000000
1030.000000
1030.000000
1030.000000
1030.000000
1030.000000
1030.000000
1030.000000
1030.000000
1030.000000
1030.000000
1030.000000
1030.000000
1030.000000
1030.000000
1030.000000
1030.000000
1030.000000
1030.000000
1030.000000
1030.000000
1030.000000
1030.000000
1030.000000
1030.000000
1030.000000
1030.000000
1030.000000
1030.000000
1030.000000
1030.000000
1030.000000
1030.000000
1030.000000
1030.000000
1030.000000
1030.000000
1030.000000
1030.000000
1030.000000
1030.000000
1030.000000
1030.000000
1030.000000
1030.000000
1030.000000
1030.000000
1030.000000
1030.000000
1030.000000
1030.000000
1030.000000
1030.000000
1030.000000
1030.000000
1030.000000
1030.000000
1030.000000
1030.000000
1030.000000
1030.000000
1030.000000
1030.000000
1030.000000
1030.000000
1030.000000
1030.000000
1030.000000
1030.000000
1030.000000
1030.000000
1030.000000
1030.000000
1030.000000
1030.000000
1030.000000
1030.000000
1030.000000
1030.000000
1030.000000
1030.000000
1030.000000
1030.000000
1030.000000
1030.000000
1030.000000
1030.000000
1030.000000
1030.000000
1030.000000
1030.000000
1030.000000
1030.000000
1030.000000
1030.000000
1030.000000
1030.000000
1030.000000
1030.000000
1030.000000
1030.000000
1030.000000
1030.000000
1030.000000
1030.000000
1030.000000
1030.000000
1030.000000
1030.000000
1030.000000
1030.000000
1030.000000
1030.000000
1030.000000
1030.000000
1030.000000
1030.000000
1030.000000
1030.000000
1030.000000
1030.000000
1030.000000
1030.000000
1030.000000
1030.000000
1030.000000
1030.000000
1030.000000
1030.000000
1030.000000
1030.000000
1030.000000
1030.000000
1030.000000
1030.000000
1030.000000
1030.000000
1030.000000
1030.000000
1030.000000
1030.000000
1030.000000
1030.000000
1030.000000
1030.000000
1030.000000
1030.000000
1030.000000
1030.000000
1030.000000
1030.000000
1030.000000
1030.000000
1030.000000
1030.000000
1030.000000
1030.000000
1030.000000
1030.000000
1030.000000
1030.000000
1030.000000
1030.000000
1030.000000
1030.000000
1030.000000
1030.000000
1030.000000
1030.000000
1030.000000
1030.000000
1030.000000
1030.000000
1030.000000
1030.000000
1030.000000
1030.000000
1030.000000
1030.000000
1030.000000
1030.000000
1030.000000
1030.000000
1030.000000
1030.000000
1030.000000
1030.000000
1030.000000
1030.000000
1030.000000
1030.000000
1030.000000
1030.000000
1030.000000
1030.000000
1030.000000
1030.000000
1030.000000
1030.000000
1030.000000
1030.000000
1030.000000
1030.000000
1030.000000
1030.000000
1030.000000
1030.000000
1030.000000
1030.000000
1030.000000
1030.000000
1030.000000
1030.000000
1030.000000
1030.000000
1030.000000
1030.000000
1030.000000
1030.000000
1030.000000
1030.000000
1030.000000
1030.000000
1030.000000
1030.000000
1030.000000
1030.000000
1030.000000
1030.000000
1030.000000
1030.000000
1030.000000
1030.000000
1030.000000
1030.000000
1030.000000
1030.000000
1030.000000
1030.000000
1030.000000
1030.000000
1030.000000
1030.000000
1030.000000
1030.000000
1030.000000
1030.000000
1030.000000
1030.000000
1030.000000
1030.000000
1030.000000
1030.000000
1030.000000
1030.000000
1030.000000
1030.000000
1030.000000
1030.000000
1030.000000
1030.000000
1030.000000
1030.000000
1030.000000
1030.000000
1030.000000
1030.000000
1030.000000
1030.000000
1030.000000
1030.000000
1030.000000
1030.000000
1030.000000
1030.000000
1030.000000
1030.000000
1030.000000
1030.000000
1030.000000
1030.000000
1030.000000
1030.000000
1030.000000
1030.000000
1030.000000
1030.000000
1030.000000
1030.000000
1030.000000
1030.000000
1030.000000
1030.000000
1030.000000
1030.000000
1030.000000
1030.000000
1030.000000
1030.000000
1030.000000
1030.000000
1030.000000
1030.000000
1030.000000
1030.000000
1030.000000
1030.000000
1030.000000
1030.000000
1030.000000
1030.000000
1030.000000
1030.000000
1030.000000
1030.000000
1030.000000
1030.000000
1030.000000
1030.000000
1030.000000
1030.000000
1030.000000
1030.000000
1030.000000
1030.000000
1030.000000
1030.000000
1030.000000
1030.000000
1030.000000
1030.000000
1030.000000
1030.000000
1030.000000
1030.000000
1030.000000
1030.000000
1030.000000
1030.000000
1030.000000
1030.000000
1030.000000
1030.000000
1030.000000
1030.000000
1030.000000
1030.000000
1030.000000
1030.000000
1030.000000
1030.000000
1030.000000
1030.000000
1030.000000
1030.000000
1030.000000
1030.000000
1030.000000
1030.000000
1030.000000
1030.000000
1030.000000
1030.000000
1030.000000
1030.000000
1030.000000
1030.000000
1030.000000
1030.000000
1030.000000
1030.000000
1030.000000
1030.000000
1030.000000
1030.000000
1030.000000
1030.000000
1030.000000
1030.000000
1030.000000
1030.000000
1030.000000
1030.000000
1030.000000
1030.000000
1030.000000
1030.000000
1030.000000
1030.000000
1030.000000
1030.000000
1030.000000
1030.000000
1030.000000
1030.000000
1030.000000
1030.000000
1030.000000
1030.000000
1030.000000
1030.000000
1030.000000
1030.000000
1030.000000
1030.000000
1030.000000
1030.000000
1030.000000
1030.000000
1030.000000
1030.000000
1030.000000
1030.000000
1030.000000
1030.000000
1030.000000
1030.000000
1030.000000
1030.000000
1030.000000
1030.000000
1030.000000
1030.000000
1030.000000
1030.000000
1030.000000
1030.000000
1030.000000
1030.000000
1030.000000
1030.000000
1030.000000
1030.000000
1030.000000
1030.000000
1030.000000
1030.000000
1030.000000
1030.000000
1030.000000
1030.000000
1030.000000
1030.000000
1030.000000
1030.000000
1030.000000
1030.000000
1030.000000
1030.000000
1030.000000
1030.000000
1030.000000
1030.000000
1030.000000
1030.000000
1030.000000
1030.000000
1030.000000
1030.000000
1030.000000
1030.000000
1030.000000
1030.000000
1030.000000
1030.000000
1030.000000
1030.000000
1030.000000
1030.000000
1030.000000
1030.000000
1030.000000
1030.000000
1030.000000
1030.000000
1030.000000
1030.000000
1030.000000
1030.000000
1030.000000
1030.000000
1030.000000
1030.000000
1030.000000
1030.000000
1030.000000
1030.000000
1030.000000
1030.000000
1030.000000
1030.000000
1030.000000
1030.000000
1030.000000
1030.000000
1030.000000
1030.000000
1030.000000
1030.000000
1030.000000
1030.000000
1030.000000
1030.000000
1030.000000
1030.000000
1030.000000
1030.000000
1030.000000
1030.000000
1030.000000
1030.000000
1030.000000
1030.000000
1030.000000
1030.000000
1030.000000
1030.000000
1030.000000
1030.000000
1030.000000
1030.000000
1030.000000
1030.000000
1030.000000
1030.000000
1030.000000
1030.000000
1030.000000
1030.000000
1030.000000
1030.000000
1030.000000
1030.000000
1030.000000
1030.000000
1030.000000
1030.000000
1030.000000
1030.000000
1030.000000
1030.000000
1030.000000
1030.000000
1030.000000
1030.000000
1030.000000
1030.000000
1030.000000
1030.000000
1030.000000
1030.000000
1030.000000
1030.000000
1030.000000
1030.000000
1030.000000
1030.000000
1030.000000
1030.000000
1030.000000
1030.000000
1030.000000
1030.000000
1030.000000
1030.000000
1030.000000
1030.000000
1030.000000
1030.000000
1030.000000
1030.000000
1030.000000
1030.000000
1030.000000
1030.000000
1030.000000
1030.000000
1030.000000
1030.000000
1030.000000
1030.000000
1030.000000
1030.000000
1030.000000
1030.000000
1030.000000
1030.000000
1030.000000
1030.000000
1030.000000
1030.000000
1030.000000
1030.000000
1030.000000
1030.000000
1030.000000
1030.000000
1030.000000
1030.000000
1030.000000
1030.000000
1030.000000
1030.000000
1030.000000
1030.000000
1030.000000
1030.000000
1030.000000
1030.000000
1030.000000
1030.000000
1030.000000
1030.000000
1030.000000
1030.000000
1030.000000
1030.000000
1030.000000
1030.000000
1030.000000
1030.000000
1030.000000
1030.000000
1030.000000
1030.000000
1030.000000
1030.000000
1030.000000
1030.000000
1030.000000
1030.000000
1030.000000
1030.000000
1030.000000
1030.000000
1030.000000
1030.000000
1030.000000
1030.000000
1030.000000
1030.000000
1030.000000
1030.000000
1030.000000
1030.000000
1030.000000
1030.000000
1030.000000
1030.000000
1030.000000
1030.000000
1030.000000
1030.000000
1030.000000
1030.000000
1030.000000
1030.000000
1030.000000
1030.000000
1030.000000
1030.000000
1030.000000
1030.000000
1030.000000
1030.000000
1030.000000
1030.000000
1030.000000
1030.000000
1030.000000
1030.000000
1030.000000
1030.000000
1030.000000
1030.000000
1030.000000
1030.000000
1030.000000
1030.000000
1030.000000
1030.000000
1030.000000
1030.000000
1030.000000
1030.000000
1030.000000
1030.000000
1030.000000
1030.000000
1030.000000
1030.000000
1030.000000
1030.000000
1030.000000
1030.000000
1030.000000
1030.000000
1030.000000
1030.000000
1030.000000
1030.000000
1030.000000
1030.000000
1030.000000
1030.000000
1030.000000
1030.000000
1030.000000
1030.000000
1030.000000
1030.000000
1030.000000
1030.000000
1030.000000
1030.000000
1030.000000
1030.000000
1030.000000
1030.000000
1030.000000
1030.000000
1030.000000
1030.000000
1030.000000
1030.000000
1030.000000
1030.000000
1030.000000
1030.000000
1030.000000
1030.000000
1030.000000
1030.000000
1030.000000
1030.000000
1030.000000
1030.000000
1030.000000
1030.000000
1030.000000
1030.000000
1030.000000
1030.000000
1030.000000
1030.000000
1030.000000
1030.000000
1030.000000
1030.000000
1030.000000
1030.000000
1030.000000
1030.000000
1030.000000
1030.000000
1030.000000
1030.000000
1030.000000
1030.000000
1030.000000
1030.000000
1030.000000
1030.000000
1030.000000
1030.000000
1030.000000
1030.000000
1030.000000
1030.000000
1030.000000
1030.000000
1030.000000
1030.000000
1030.000000
1030.000000
1030.000000
1030.000000
1030.000000
1030.000000
1030.000000
1030.000000
1030.000000
1030.000000
1030.000000
1030.000000
1030.000000
1030.000000
1030.000000
1030.000000
1030.000000
1030.000000
1030.000000
1030.000000
1030.000000
1030.000000
1030.000000
1030.000000
1030.000000
1030.000000
1030.000000
1030.000000
1030.000000
1030.000000
1030.000000
1030.000000
1030.000000
1030.000000
1030.000000
1030.000000
1030.000000
1030.000000
1030.000000
1030.000000
1030.000000
1030.000000
1030.000000
1030.000000
1030.000000
1030.000000
1030.000000
1030.000000
1030.000000
1030.000000
1030.000000
1030.000000
1030.000000
1030.000000
1030.000000
1030.000000
1030.000000
1030.000000
1030.000000
1030.000000
1030.000000
1030.000000
1030.000000
1030.000000
1030.000000
1030.000000
1030.000000
1030.000000
1030.000000
1030.000000
1030.000000
1030.000000
1030.000000
1030.000000
1030.000000
1030.000000
1030.000000
1030.000000
1030.000000
1030.000000
1030.000000
1030.000000
1030.000000
1030.000000
1030.000000
1030.000000
1030.000000
1030.000000
1030.000000
1030.000000
1030.000000
1030.000000
1030.000000
1030.000000
1030.000000
1030.000000
1030.000000
1030.000000
1030.000000
1030.000000
1030.000000
1030.000000
1030.000000
1030.000000
1030.000000
1030.000000
1030.000000
1030.000000
1030.000000
1030.000000
1030.000000
1030.000000
1030.000000
1030.000000
1030.000000
1030.000000
1030.000000
1030.000000
1030.000000
1030.000000
1030.000000
1030.000000
1030.000000
1030.000000
1030.000000
1030.000000
1030.000000
1030.000000
1030.000000
1030.000000
1030.000000
1030.000000
1030.000000
1030.000000
1030.000000
1030.000000
1030.000000
1030.000000
1030.000000
1030.000000
1030.000000
1030.000000
1030.000000
1030.000000
1030.000000
1030.000000
1030.000000
1030.000000
1030.000000
1030.000000
1030.000000
1030.000000
1030.000000
1030.000000
1030.000000
1030.000000
1030.000000
1030.000000
1030.000000
1030.000000
1030.000000
1030.000000
1030.000000
1030.000000
1030.000000
1030.000000
1030.000000
1030.000000
1030.000000
1030.000000
1030.000000
1030.000000
1030.000000
1030.000000
1030.000000
1030.000000
1030.000000
1030.000000
1030.000000
1030.000000
1030.000000
1030.000000
1030.000000
1030.000000
1030.000000
1030.000000
1030.000000
1030.000000
1030.000000
1030.000000
1030.000000
1030.000000
1030.000000
1030.000000
1030.000000
1030.000000
1030.000000
1030.000000
1030.000000
1030.000000
1030.000000
1030.000000
1030.000000
1030.000000
1030.000000
1030.000000
1030.000000
1030.000000
1030.000000
1030.000000
1030.000000
1030.000000
1030.000000
1030.000000
1030.000000
1030.000000
1030.000000
1030.000000
1030.000000
1030.000000
1030.000000
1030.000000
1030.000000
1030.000000
1030.000000
1030.000000
1030.000000
1030.000000
1030.000000
1030.000000
1030.000000
1030.000000
1030.000000
1030.000000
1030.000000
1030.000000
1030.000000
1030.000000
1030.000000
1030.000000
1030.000000
1030.000000
1030.000000
1030.000000
1030.000000
1030.000000
1030.000000
1030.000000
1030.000000
1030.000000
1030.000000
1030.000000
1030.000000
1030.000000
1030.000000
1030.000000
1030.000000
1030.000000
1030.000000
1030.000000
1030.000000
1030.000000
1030.000000
1030.000000
1030.000000
1030.000000
1030.000000
1030.000000
1030.000000
1030.000000
1030.000000
1030.000000
1030.000000
1030.000000
1030.000000
1030.000000
1030.000000
1030.000000
1030.000000
1030.000000
1030.000000
1030.000000
1030.000000
1030.000000
1030.000000
1030.000000
1030.000000
1030.000000
1030.000000
1030.000000
1030.000000
1030.000000
1030.000000
1030.000000
1030.000000
1030.000000
1030.000000
1030.000000
1030.000000
1030.000000
1030.000000
1030.000000
1030.000000
1030.000000
1030.000000
1030.000000
1030.000000
1030.000000
1030.000000
1030.000000
1030.000000
1030.000000
1030.000000
1030.000000
1030.000000
1030.000000
1030.000000
1030.000000
1030.000000
1030.000000
1030.000000
1030.000000
1030.000000
1030.000000
1030.000000
1030.000000
1030.000000
1030.000000
1030.000000
1030.000000
1030.000000
1030.000000
1030.000000
1030.000000
1030.000000
1030.000000
1030.000000
1030.000000
1030.000000
1030.000000
1030.000000
1030.000000
1030.000000
1030.000000
1030.000000
1030.000000
1030.000000
1030.000000
1030.000000
1030.000000
1030.000000
1030.000000
1030.000000
1030.000000
1030.000000
1030.000000
1030.000000
1030.000000
1030.000000
1030.000000
1030.000000
1030.000000
1030.000000
1030.000000
1030.000000
1030.000000
1030.000000
1030.000000
1030.000000
1030.000000
1030.000000
1030.000000
1030.000000
1030.000000
1030.000000
1030.000000
1030.000000
1030.000000
1030.000000
1030.000000
1030.000000
1030.000000
1030.000000
1030.000000
1030.000000
1030.000000
1030.000000
1030.000000
1030.000000
1030.000000
1030.000000
1030.000000
1030.000000
1030.000000
1030.000000
1030.000000
1030.000000
1030.000000
1030.000000
1030.000000
1030.000000
1030.000000
1030.000000
1030.000000
1030.000000
1030.000000
1030.000000
1030.000000
1030.000000
1030.000000
1030.000000
1030.000000
1030.000000
1030.000000
1030.000000
1030.000000
1030.000000
1030.000000
1030.000000
1030.000000
1030.000000
1030.000000
1030.000000
1030.000000
1030.000000
1030.000000
1030.000000
1030.000000
1030.000000
1030.000000
1030.000000
1030.000000
1030.000000
1030.000000
1030.000000
1030.000000
1030.000000
1030.000000
1030.000000
1030.000000
1030.000000
1030.000000
1030.000000
1030.000000
1030.000000
1030.000000
1030.000000
1030.000000
1030.000000
1030.000000
1030.000000
1030.000000
1030.000000
1030.000000
1030.000000
1030.000000
1030.000000
1030.000000
1030.000000
1030.000000
1030.000000
1030.000000
1030.000000
1030.000000
1030.000000
1030.000000
1030.000000
1030.000000
1030.000000
1030.000000
1030.000000
1030.000000
1030.000000
1030.000000
1030.000000
1030.000000
1030.000000
1030.000000
1030.000000
1030.000000
1030.000000
1030.000000
1030.000000
1030.000000
1030.000000
1030.000000
1030.000000
1030.000000
1030.000000
1030.000000
1030.000000
1030.000000
1030.000000
1030.000000
1030.000000
1030.000000
1030.000000
1030.000000
1030.000000
1030.000000
1030.000000
1030.000000
1030.000000
1030.000000
1030.000000
1030.000000
1030.000000
1030.000000
1030.000000
1030.000000
1030.000000
1030.000000
1030.000000
1030.000000
1030.000000
1030.000000
1030.000000
1030.000000
1030.000000
1030.000000
1030.000000
1030.000000
1030.000000
1030.000000
1030.000000
1030.000000
1030.000000
1030.000000
1030.000000
1030.000000
1030.000000
1030.000000
1030.000000
1030.000000
1030.000000
1030.000000
1030.000000
1030.000000
1030.000000
1030.000000
1030.000000
1030.000000
1030.000000
1030.000000
1030.000000
1030.000000
1030.000000
1030.000000
1030.000000
1030.000000
1030.000000
1030.000000
1030.000000
1030.000000
1030.000000
1030.000000
1030.000000
1030.000000
1030.000000
1030.000000
1030.000000
1030.000000
1030.000000
1030.000000
1030.000000
1030.000000
1030.000000
1030.000000
1030.000000
1030.000000
1030.000000
1030.000000
1030.000000
1030.000000
1030.000000
1030.000000
1030.000000
1030.000000
1030.000000
1030.000000
1030.000000
1030.000000
1030.000000
1030.000000
1030.000000
1030.000000
1030.000000
1030.000000
1030.000000
1030.000000
1030.000000
1030.000000
1030.000000
1030.000000
1030.000000
1030.000000
1030.000000
1030.000000
1030.000000
1030.000000
1030.000000
1030.000000
1030.000000
1030.000000
1030.000000
1030.000000
1030.000000
1030.000000
1030.000000
1030.000000
1030.000000
1030.000000
1030.000000
1030.000000
1030.000000
1030.000000
1030.000000
1030.000000
1030.000000
1030.000000
1030.000000
1030.000000
1030.000000
1030.000000
1030.000000
1030.000000
1030.000000
1030.000000
1030.000000
1030.000000
1030.000000
1030.000000
1030.000000
1030.000000
1030.000000
1030.000000
1030.000000
1030.000000
1030.000000
1030.000000
1030.000000
1030.000000
1030.000000
1030.000000
1030.000000
1030.000000
1030.000000
1030.000000
1030.000000
1030.000000
1030.000000
1030.000000
1030.000000
1030.000000
1030.000000
1030.000000
1030.000000
1030.000000
1030.000000
1030.000000
1030.000000
1030.000000
1030.000000
1030.000000
1030.000000
1030.000000
1030.000000
1030.000000
1030.000000
1030.000000
1030.000000
1030.000000
1030.000000
1030.000000
1030.000000
1030.000000
1030.000000
1030.000000
1030.000000
1030.000000
1030.000000
1030.000000
1030.000000
1030.000000
1030.000000
1030.000000
1030.000000
1030.000000
1030.000000
1030.000000
1030.000000
1030.000000
1030.000000
1030.000000
1030.000000
1030.000000
1030.000000
1030.000000
1030.000000
1030.000000
1030.000000
1030.000000
1030.000000
1030.000000
1030.000000
1030.000000
1030.000000
1030.000000
1030.000000
1030.000000
1030.000000
1030.000000
1030.000000
1030.000000
1030.000000
1030.000000
1030.000000
1030.000000
1030.000000
1030.000000
1030.000000
1030.000000
1030.000000
1030.000000
1030.000000
1030.000000
1030.000000
1030.000000
1030.000000
1030.000000
1030.000000
1030.000000
1030.000000
1030.000000
1030.000000
1030.000000
1030.000000
1030.000000
1030.000000
1030.000000
1030.000000
1030.000000
1030.000000
1030.000000
1030.000000
1030.000000
1030.000000
1030.000000
1030.000000
1030.000000
1030.000000
1030.000000
1030.000000
1030.000000
1030.000000
1030.000000
1030.000000
1030.000000
1030.000000
1030.000000
1030.000000
1030.000000
1030.000000
1030.000000
1030.000000
1030.000000
1030.000000
1030.000000
1030.000000
1030.000000
1030.000000
1030.000000
1030.000000
1030.000000
1030.000000
1030.000000
1030.000000
1030.000000
1030.000000
1030.000000
1030.000000
1030.000000
1030.000000
1030.000000
1030.000000
1030.000000
1030.000000
1030.000000
1030.000000
1030.000000
1030.000000
1030.000000
1030.000000
1030.000000
1030.000000
1030.000000
1030.000000
1030.000000
1030.000000
1030.000000
1030.000000
1030.000000
1030.000000
1030.000000
1030.000000
1030.000000
1030.000000
1030.000000
1030.000000
1030.000000
1030.000000
1030.000000
1030.000000
1030.000000
1030.000000
1030.000000
1030.000000
1030.000000
1030.000000
1030.000000
1030.000000
1030.000000
1030.000000
1030.000000
1030.000000
1030.000000
1030.000000
1030.000000
1030.000000
1030.000000
1030.000000
1030.000000
1030.000000
1030.000000
1030.000000
1030.000000
1030.000000
1030.000000
1030.000000
1030.000000
1030.000000
1030.000000
1030.000000
1030.000000
1030.000000
1030.000000
1030.000000
1030.000000
1030.000000
1030.000000
1030.000000
1030.000000
1030.000000
1030.000000
1030.000000
1030.000000
1030.000000
1030.000000
1030.000000
1030.000000
1030.000000
1030.000000
1030.000000
1030.000000
1030.000000
1030.000000
1030.000000
1030.000000
1030.000000
1030.000000
1030.000000
1030.000000
1030.000000
1030.000000
1030.000000
1030.000000
1030.000000
1030.000000
1030.000000
1030.000000
1030.000000
1030.000000
1030.000000
1030.000000
1030.000000
1030.000000
1030.000000
1030.000000
1030.000000
1030.000000
1030.000000
1030.000000
1030.000000
1030.000000
1030.000000
1030.000000
1030.000000
1030.000000
1030.000000
1030.000000
1030.000000
1030.000000
1030.000000
1030.000000
1030.000000
1030.000000
1030.000000
1030.000000
1030.000000
1030.000000
1030.000000
1030.000000
1030.000000
1030.000000
1030.000000
1030.000000
1030.000000
1030.000000
1030.000000
1030.000000
1030.000000
1030.000000
1030.000000
1030.000000
1030.000000
1030.000000
1030.000000
1030.000000
1030.000000
1030.000000
1030.000000
1030.000000
1030.000000
1030.000000
1030.000000
1030.000000
1030.000000
1030.000000
1030.000000
1030.000000
1030.000000
1030.000000
1030.000000
1030.000000
1030.000000
1030.000000
1030.000000
1030.000000
1030.000000
1030.000000
1030.000000
1030.000000
1030.000000
1030.000000
1030.000000
1030.000000
1030.000000
1030.000000
1030.000000
1030.000000
1030.000000
1030.000000
1030.000000
1030.000000
1030.000000
1030.000000
1030.000000
1030.000000
1030.000000
1030.000000
1030.000000
1030.000000
1030.000000
1030.000000
1030.000000
1030.000000
1030.000000
1030.000000
1030.000000
1030.000000
1030.000000
1030.000000
1030.000000
1030.000000
1030.000000
1030.000000
1030.000000
1030.000000
1030.000000
1030.000000
1030.000000
1030.000000
1030.000000
1030.000000
1030.000000
1030.000000
1030.000000
1030.000000
1030.000000
1030.000000
1030.000000
1030.000000
1030.000000
1030.000000
1030.000000
1030.000000
1030.000000
1030.000000
1030.000000
1030.000000
1030.000000
1030.000000
1030.000000
1030.000000
1030.000000
1030.000000
1030.000000
1030.000000
1030.000000
1030.000000
1030.000000
1030.000000
1030.000000
1030.000000
1030.000000
1030.000000
1030.000000
1030.000000
1030.000000
1030.000000
1030.000000
1030.000000
1030.000000
1030.000000
1030.000000
1030.000000
1030.000000
1030.000000
1030.000000
1030.000000
1030.000000
1030.000000
1030.000000
1030.000000
1030.000000
1030.000000
1030.000000
1030.000000
1030.000000
1030.000000
1030.000000
1030.000000
1030.000000
1030.000000
1030.000000
1030.000000
1030.000000
1030.000000
1030.000000
1030.000000
1030.000000
1030.000000
1030.000000
1030.000000
1030.000000
1030.000000
1030.000000
1030.000000
1030.000000
1030.000000
1030.000000
1030.000000
1030.000000
1030.000000
1030.000000
1030.000000
1030.000000
1030.000000
1030.000000
1030.000000
1030.000000
1030.000000
1030.000000
1030.000000
1030.000000
1030.000000
1030.000000
1030.000000
1030.000000
1030.000000
1030.000000
1030.000000
1030.000000
1030.000000
1030.000000
1030.000000
1030.000000
1030.000000
1030.000000
1030.000000
1030.000000
1030.000000
1030.000000
1030.000000
1030.000000
1030.000000
1030.000000
1030.000000
1030.000000
1030.000000
1030.000000
1030.000000
1030.000000
1030.000000
1030.000000
1030.000000
1030.000000
1030.000000
1030.000000
1030.000000
1030.000000
1030.000000
1030.000000
1030.000000
1030.000000
1030.000000
1030.000000
1030.000000
1030.000000
1030.000000
1030.000000
1030.000000
1030.000000
1030.000000
1030.000000
1030.000000
1030.000000
1030.000000
1030.000000
1030.000000
1030.000000
1030.000000
1030.000000
1030.000000
1030.000000
1030.000000
1030.000000
1030.000000
1030.000000
1030.000000
1030.000000
1030.000000
1030.000000
1030.000000
1030.000000
1030.000000
1030.000000
1030.000000
1030.000000
1030.000000
1030.000000
1030.000000
1030.000000
1030.000000
1030.000000
1030.000000
1030.000000
1030.000000
1030.000000
1030.000000
1030.000000
1030.000000
1030.000000
1030.000000
1030.000000
1030.000000
1030.000000
1030.000000
1030.000000
1030.000000
1030.000000
1030.000000
1030.000000
1030.000000
1030.000000
1030.000000
1030.000000
1030.000000
1030.000000
1030.000000
1030.000000
1030.000000
1030.000000
1030.000000
1030.000000
1030.000000
1030.000000
1030.000000
1030.000000
1030.000000
1030.000000
1030.000000
1030.000000
1030.000000
1030.000000
1030.000000
1030.000000
1030.000000
1030.000000
1030.000000
1030.000000
1030.000000
1030.000000
1030.000000
1030.000000
1030.000000
1030.000000
1030.000000
1030.000000
1030.000000
1030.000000
1030.000000
1030.000000
1030.000000
1030.000000
1030.000000
1030.000000
1030.000000
1030.000000
1030.000000
1030.000000
1030.000000
1030.000000
1030.000000
1030.000000
1030.000000
1030.000000
1030.000000
1030.000000
1030.000000
1030.000000
1030.000000
1030.000000
1030.000000
1030.000000
1030.000000
1030.000000
1030.000000
1030.000000
1030.000000
1030.000000
1030.000000
1030.000000
1030.000000
1030.000000
1030.000000
1030.000000
1030.000000
1030.000000
1030.000000
1030.000000
1030.000000
1030.000000
1030.000000
1030.000000
1030.000000
1030.000000
1030.000000
1030.000000
1030.000000
1030.000000
1030.000000
1030.000000
1030.000000
1030.000000
1030.000000
1030.000000
1030.000000
1030.000000
1030.000000
1030.000000
1030.000000
1030.000000
1030.000000
1030.000000
1030.000000
1030.000000
1030.000000
1030.000000
1030.000000
1030.000000
1030.000000
1030.000000
1030.000000
1030.000000
1030.000000
1030.000000
1030.000000
1030.000000
1030.000000
1030.000000
1030.000000
1030.000000
1030.000000
1030.000000
1030.000000
1030.000000
1030.000000
1030.000000
1030.000000
1030.000000
1030.000000
1030.000000
1030.000000
1030.000000
1030.000000
1030.000000
1030.000000
1030.000000
1030.000000
1030.000000
1030.000000
1030.000000
1030.000000
1030.000000
1030.000000
1030.000000
1030.000000
1030.000000
1030.000000
1030.000000
1030.000000
1030.000000
1030.000000
1030.000000
1030.000000
1030.000000
1030.000000
1030.000000
1030.000000
1030.000000
1030.000000
1030.000000
1030.000000
1030.000000
1030.000000
1030.000000
1030.000000
1030.000000
1030.000000
1030.000000
1030.000000
1030.000000
1030.000000
1030.000000
1030.000000
1030.000000
1030.000000
1030.000000
1030.000000
1030.000000
1030.000000
1030.000000
1030.000000
1030.000000
1030.000000
1030.000000
1030.000000
1030.000000
1030.000000
1030.000000
1030.000000
1030.000000
1030.000000
1030.000000
1030.000000
1030.000000
1030.000000
1030.000000
1030.000000
1030.000000
1030.000000
1030.000000
1030.000000
1030.000000
1030.000000
1030.000000
1030.000000
1030.000000
1030.000000
1030.000000
1030.000000
1030.000000
1030.000000
1030.000000
1030.000000
1030.000000
1030.000000
1030.000000
1030.000000
1030.000000
1030.000000
1030.000000
1030.000000
1030.000000
1030.000000
1030.000000
1030.000000
1030.000000
1030.000000
1030.000000
1030.000000
1030.000000
1030.000000
1030.000000
1030.000000
1030.000000
1030.000000
1030.000000
1030.000000
1030.000000
1030.000000
1030.000000
1030.000000
1030.000000
1030.000000
1030.000000
1030.000000
1030.000000
1030.000000
1030.000000
1030.000000
1030.000000
1030.000000
1030.000000
1030.000000
1030.000000
1030.000000
1030.000000
1030.000000
1030.000000
1030.000000
1030.000000
1030.000000
1030.000000
1030.000000
1030.000000
1030.000000
1030.000000
1030.000000
1030.000000
1030.000000
1030.000000
1030.000000
1030.000000
1030.000000
1030.000000
1030.000000
1030.000000
1030.000000
1030.000000
1030.000000
1030.000000
1030.000000
1030.000000
1030.000000
1030.000000
1030.000000
1030.000000
1030.000000
1030.000000
1030.000000
1030.000000
1030.000000
1030.000000
1030.000000
1030.000000
1030.000000
1030.000000
1030.000000
1030.000000
1030.000000
1030.000000
1030.000000
1030.000000
1030.000000
1030.000000
1030.000000
1030.000000
1030.000000
1030.000000
1030.000000
1030.000000
1030.000000
1030.000000
1030.000000
1030.000000
1030.000000
1030.000000
1030.000000
1030.000000
1030.000000
1030.000000
1030.000000
1030.000000
1030.000000
1030.000000
1030.000000
1030.000000
1030.000000
1030.000000
1030.000000
1030.000000
1030.000000
1030.000000
1030.000000
1030.000000
1030.000000
1030.000000
1030.000000
1030.000000
1030.000000
1030.000000
1030.000000
1030.000000
1030.000000
1030.000000
1030.000000
1030.000000
1030.000000
1030.000000
1030.000000
1030.000000
1030.000000
1030.000000
1030.000000
1030.000000
1030.000000
1030.000000
1030.000000
1030.000000
1030.000000
1030.000000
1030.000000
1030.000000
1030.000000
1030.000000
1030.000000
1030.000000
1030.000000
1030.000000
1030.000000
1030.000000
1030.000000
1030.000000
1030.000000
1030.000000
1030.000000
1030.000000
1030.000000
1030.000000
1030.000000
1030.000000
1030.000000
1030.000000
1030.000000
1030.000000
1030.000000
1030.000000
1030.000000
1030.000000
1030.000000
1030.000000
1030.000000
1030.000000
1030.000000
1030.000000
1030.000000
1030.000000
1030.000000
1030.000000
1030.000000
1030.000000
1030.000000
1030.000000
1030.000000
1030.000000
1030.000000
1030.000000
1030.000000
1030.000000
1030.000000
1030.000000
1030.000000
1030.000000
1030.000000
1030.000000
1030.000000
1030.000000
1030.000000
1030.000000
1030.000000
1030.000000
1030.000000
1030.000000
1030.000000
1030.000000
1030.000000
1030.000000
1030.000000
1030.000000
1030.000000
1030.000000
1030.000000
1030.000000
1030.000000
1030.000000
1030.000000
1030.000000
1030.000000
1030.000000
1030.000000
1030.000000
1030.000000
1030.000000
1030.000000
1030.000000
1030.000000
1030.000000
1030.000000
1030.000000
1030.000000
1030.000000
1030.000000
1030.000000
1030.000000
1030.000000
1030.000000
1030.000000
1030.000000
1030.000000
1030.000000
1030.000000
1030.000000
1030.000000
1030.000000
1030.000000
1030.000000
1030.000000
1030.000000
1030.000000
1030.000000
1030.000000
1030.000000
1030.000000
1030.000000
1030.000000
1030.000000
1030.000000
1030.000000
1030.000000
1030.000000
1030.000000
1030.000000
1030.000000
1030.000000
1030.000000
1030.000000
1030.000000
1030.000000
1030.000000
1030.000000
1030.000000
1030.000000
1030.000000
1030.000000
1030.000000
1030.000000
1030.000000
1030.000000
1030.000000
1030.000000
1030.000000
1030.000000
1030.000000
1030.000000
1030.000000
1030.000000
1030.000000
1030.000000
1030.000000
1030.000000
1030.000000
1030.000000
1030.000000
1030.000000
1030.000000
1030.000000
1030.000000
1030.000000
1030.000000
1030.000000
1030.000000
1030.000000
1030.000000
1030.000000
1030.000000
1030.000000
1030.000000
1030.000000
1030.000000
1030.000000
1030.000000
1030.000000
1030.000000
1030.000000
1030.000000
1030.000000
1030.000000
1030.000000
1030.000000
1030.000000
1030.000000
1030.000000
1030.000000
1030.000000
1030.000000
1030.000000
1030.000000
1030.000000
1030.000000
1030.000000
1030.000000
1030.000000
1030.000000
1030.000000
1030.000000
1030.000000
1030.000000
1030.000000
1030.000000
1030.000000
1030.000000
1030.000000
1030.000000
1030.000000
1030.000000
1030.000000
1030.000000
1030.000000
1030.000000
1030.000000
1030.000000
1030.000000
1030.000000
1030.000000
1030.000000
1030.000000
1030.000000
1030.000000
1030.000000
1030.000000
1030.000000
1030.000000
1030.000000
1030.000000
1030.000000
1030.000000
1030.000000
1030.000000
1030.000000
1030.000000
1030.000000
1030.000000
1030.000000
1030.000000
1030.000000
1030.000000
1030.000000
1030.000000
1030.000000
1030.000000
1030.000000
1030.000000
1030.000000
1030.000000
1030.000000
1030.000000
1030.000000
1030.000000
1030.000000
1030.000000
1030.000000
1030.000000
1030.000000
1030.000000
1030.000000
1030.000000
1030.000000
1030.000000
1030.000000
1030.000000
1030.000000
1030.000000
1030.000000
1030.000000
1030.000000
1030.000000
1030.000000
1030.000000
1030.000000
1030.000000
1030.000000
1030.000000
1030.000000
1030.000000
1030.000000
1030.000000
1030.000000
1030.000000
1030.000000
1030.000000
1030.000000
1030.000000
1030.000000
1030.000000
1030.000000
1030.000000
1030.000000
1030.000000
1030.000000
1030.000000
1030.000000
1030.000000
1030.000000
1030.000000
1030.000000
1030.000000
1030.000000
1030.000000
1030.000000
1030.000000
1030.000000
1030.000000
1030.000000
1030.000000
1030.000000
1030.000000
1030.000000
1030.000000
1030.000000
1030.000000
1030.000000
1030.000000
1030.000000
1030.000000
1030.000000
1030.000000
1030.000000
1030.000000
1030.000000
1030.000000
1030.000000
1030.000000
1030.000000
1030.000000
1030.000000
1030.000000
1030.000000
1030.000000
1030.000000
1030.000000
1030.000000
1030.000000
1030.000000
1030.000000
1030.000000
1030.000000
1030.000000
1030.000000
1030.000000
1030.000000
1030.000000
1030.000000
1030.000000
1030.000000
1030.000000
1030.000000
1030.000000
1030.000000
1030.000000
1030.000000
1030.000000
1030.000000
1030.000000
1030.000000
1030.000000
1030.000000
1030.000000
1030.000000
1030.000000
1030.000000
1030.000000
1030.000000
1030.000000
1030.000000
1030.000000
1030.000000
1030.000000
1030.000000
1030.000000
1030.000000
1030.000000
1030.000000
1030.000000
1030.000000
1030.000000
1030.000000
1030.000000
1030.000000
1030.000000
1030.000000
1030.000000
1030.000000
1030.000000
1030.000000
1030.000000
1030.000000
1030.000000
1030.000000
1030.000000
1030.000000
1030.000000
1030.000000
1030.000000
1030.000000
1030.000000
1030.000000
1030.000000
1030.000000
1030.000000
1030.000000
1030.000000
1030.000000
1030.000000
1030.000000
1030.000000
1030.000000
1030.000000
1030.000000
1030.000000
1030.000000
1030.000000
1030.000000
1030.000000
1030.000000
1030.000000
1030.000000
1030.000000
1030.000000
1030.000000
1030.000000
1030.000000
1030.000000
1030.000000
1030.000000
1030.000000
1030.000000
1030.000000
1030.000000
1030.000000
1030.000000
1030.000000
1030.000000
1030.000000
1030.000000
1030.000000
1030.000000
1030.000000
1030.000000
1030.000000
1030.000000
1030.000000
1030.000000
1030.000000
1030.000000
1030.000000
1030.000000
1030.000000
1030.000000
1030.000000
1030.000000
1030.000000
1030.000000
1030.000000
1030.000000
1030.000000
1030.000000
1030.000000
1030.000000
1030.000000
1030.000000
1030.000000
1030.000000
1030.000000
1030.000000
1030.000000
1030.000000
1030.000000
1030.000000
1030.000000
1030.000000
1030.000000
1030.000000
1030.000000
1030.000000
1030.000000
1030.000000
1030.000000
1030.000000
1030.000000
1030.000000
1030.000000
1030.000000
1030.000000
1030.000000
1030.000000
1030.000000
1030.000000
1030.000000
1030.000000
1030.000000
1030.000000
1030.000000
1030.000000
1030.000000
1030.000000
1030.000000
1030.000000
1030.000000
1030.000000
1030.000000
1030.000000
1030.000000
1030.000000
1030.000000
1030.000000
1030.000000
1030.000000
1030.000000
1030.000000
1030.000000
1030.000000
1030.000000
1030.000000
1030.000000
1030.000000
1030.000000
1030.000000
1030.000000
1030.000000
1030.000000
1030.000000
1030.000000
1030.000000
1030.000000
1030.000000
1030.000000
1030.000000
1030.000000
1030.000000
1030.000000
1030.000000
1030.000000
1030.000000
1030.000000
1030.000000
1030.000000
1030.000000
1030.000000
1030.000000
1030.000000
1030.000000
1030.000000
1030.000000
1030.000000
1030.000000
1030.000000
1030.000000
1030.000000
1030.000000
1030.000000
1030.000000
1030.000000
1030.000000
1030.000000
1030.000000
1030.000000
1030.000000
1030.000000
1030.000000
1030.000000
1030.000000
1030.000000
1030.000000
1030.000000
1030.000000
1030.000000
1030.000000
1030.000000
1030.000000
1030.000000
1030.000000
1030.000000
1030.000000
1030.000000
1030.000000
1030.000000
1030.000000
1030.000000
1030.000000
1030.000000
1030.000000
1030.000000
1030.000000
1030.000000
1030.000000
1030.000000
1030.000000
1030.000000
1030.000000
1030.000000
1030.000000
1030.000000
1030.000000
1030.000000
1030.000000
1030.000000
1030.000000
1030.000000
1030.000000
1030.000000
1030.000000
1030.000000
1030.000000
1030.000000
1030.000000
1030.000000
1030.000000
1030.000000
1030.000000
1030.000000
1030.000000
1030.000000
1030.000000
1030.000000
1030.000000
1030.000000
1030.000000
1030.000000
1030.000000
1030.000000
1030.000000
1030.000000
1030.000000
1030.000000
1030.000000
1030.000000
1030.000000
1030.000000
1030.000000
1030.000000
1030.000000
1030.000000
1030.000000
1030.000000
1030.000000
1030.000000
1030.000000
1030.000000
1030.000000
1030.000000
1030.000000
1030.000000
1030.000000
1030.000000
1030.000000
1030.000000
1030.000000
1030.000000
1030.000000
1030.000000
1030.000000
1030.000000
1030.000000
1030.000000
1030.000000
1030.000000
1030.000000
1030.000000
1030.000000
1030.000000
1030.000000
1030.000000
1030.000000
1030.000000
1030.000000
1030.000000
1030.000000
1030.000000
1030.000000
1030.000000
1030.000000
1030.000000
1030.000000
1030.000000
1030.000000
1030.000000
1030.000000
1030.000000
1030.000000
1030.000000
1030.000000
1030.000000
1030.000000
1030.000000
1030.000000
1030.000000
1030.000000
1030.000000
1030.000000
1030.000000
1030.000000
1030.000000
1030.000000
1030.000000
1030.000000
1030.000000
1030.000000
1030.000000
1030.000000
1030.000000
1030.000000
1030.000000
1030.000000
1030.000000
1030.000000
1030.000000
1030.000000
1030.000000
1030.000000
1030.000000
1030.000000
1030.000000
1030.000000
1030.000000
1030.000000
1030.000000
1030.000000
1030.000000
1030.000000
1030.000000
1030.000000
1030.000000
1030.000000
1030.000000
1030.000000
1030.000000
1030.000000
1030.000000
1030.000000
1030.000000
1030.000000
1030.000000
1030.000000
1030.000000
1030.000000
1030.000000
1030.000000
1030.000000
1030.000000
1030.000000
1030.000000
1030.000000
1030.000000
1030.000000
1030.000000
1030.000000
1030.000000
1030.000000
1030.000000
1030.000000
1030.000000
1030.000000
1030.000000
1030.000000
1030.000000
1030.000000
1030.000000
1030.000000
1030.000000
1030.000000
1030.000000
1030.000000
1030.000000
1030.000000
1030.000000
1030.000000
1030.000000
1030.000000
1030.000000
1030.000000
1030.000000
1030.000000
1030.000000
1030.000000
1030.000000
1030.000000
1030.000000
1030.000000
1030.000000
1030.000000
1030.000000
1030.000000
1030.000000
1030.000000
1030.000000
1030.000000
1030.000000
1030.000000
1030.000000
1030.000000
1030.000000
1030.000000
1030.000000
1030.000000
1030.000000
1030.000000
1030.000000
1030.000000
1030.000000
1030.000000
1030.000000
1030.000000
1030.000000
1030.000000
1030.000000
1030.000000
1030.000000
1030.000000
1030.000000
1030.000000
1030.000000
1030.000000
1030.000000
1030.000000
1030.000000
1030.000000
1030.000000
1030.000000
1030.000000
1030.000000
1030.000000
1030.000000
1030.000000
1030.000000
1030.000000
1030.000000
1030.000000
1030.000000
1030.000000
1030.000000
1030.000000
1030.000000
1030.000000
1030.000000
1030.000000
1030.000000
1030.000000
1030.000000
1030.000000
1030.000000
1030.000000
1030.000000
1030.000000
1030.000000
1030.000000
1030.000000
1030.000000
1030.000000
1030.000000
1030.000000
1030.000000
1030.000000
1030.000000
1030.000000
1030.000000
1030.000000
1030.000000
1030.000000
1030.000000
1030.000000
1030.000000
1030.000000
1030.000000
1030.000000
1030.000000
1030.000000
1030.000000
1030.000000
1030.000000
1030.000000
1030.000000
1030.000000
1030.000000
1030.000000
1030.000000
1030.000000
1030.000000
1030.000000
1030.000000
1030.000000
1030.000000
1030.000000
1030.000000
1030.000000
1030.000000
1030.000000
1030.000000
1030.000000
1030.000000
1030.000000
1030.000000
1030.000000
1030.000000
1030.000000
1030.000000
1030.000000
1030.000000
1030.000000
1030.000000
1030.000000
1030.000000
1030.000000
1030.000000
1030.000000
1030.000000
1030.000000
1030.000000
1030.000000
1030.000000
1030.000000
1030.000000
1030.000000
1030.000000
1030.000000
1030.000000
1030.000000
1030.000000
1030.000000
1030.000000
1030.000000
1030.000000
1030.000000
1030.000000
1030.000000
1030.000000
1030.000000
1030.000000
1030.000000
1030.000000
1030.000000
1030.000000
1030.000000
1030.000000
1030.000000
1030.000000
1030.000000
1030.000000
1030.000000
1030.000000
1030.000000
1030.000000
1030.000000
1030.000000
1030.000000
1030.000000
1030.000000
1030.000000
1030.000000
1030.000000
1030.000000
1030.000000
1030.000000
1030.000000
1030.000000
1030.000000
1030.000000
1030.000000
1030.000000
1030.000000
1030.000000
1030.000000
1030.000000
1030.000000
1030.000000
1030.000000
1030.000000
1030.000000
1030.000000
1030.000000
1030.000000
1030.000000
1030.000000
1030.000000
1030.000000
1030.000000
1030.000000
1030.000000
1030.000000
1030.000000
1030.000000
1030.000000
1030.000000
1030.000000
1030.000000
1030.000000
1030.000000
1030.000000
1030.000000
1030.000000
1030.000000
1030.000000
1030.000000
1030.000000
1030.000000
1030.000000
1030.000000
1030.000000
1030.000000
1030.000000
1030.000000
1030.000000
1030.000000
1030.000000
1030.000000
1030.000000
1030.000000
1030.000000
1030.000000
1030.000000
1030.000000
1030.000000
1030.000000
1030.000000
1030.000000
1030.000000
1030.000000
1030.000000
1030.000000
1030.000000
1030.000000
1030.000000
1030.000000
1030.000000
1030.000000
1030.000000
1030.000000
1030.000000
1030.000000
1030.000000
1030.000000
1030.000000
1030.000000
1030.000000
1030.000000
1030.000000
1030.000000
1030.000000
1030.000000
1030.000000
1030.000000
1030.000000
1030.000000
1030.000000
1030.000000
1030.000000
1030.000000
1030.000000
1030.000000
1030.000000
1030.000000
1030.000000
1030.000000
1030.000000
1030.000000
1030.000000
1030.000000
1030.000000
1030.000000
1030.000000
1030.000000
1030.000000
1030.000000
1030.000000
1030.000000
1030.000000
1030.000000
1030.000000
1030.000000
1030.000000
1030.000000
1030.000000
1030.000000
1030.000000
1030.000000
1030.000000
1030.000000
1030.000000
1030.000000
1030.000000
1030.000000
1030.000000
1030.000000
1030.000000
1030.000000
1030.000000
1030.000000
1030.000000
1030.000000
1030.000000
1030.000000
1030.000000
1030.000000
1030.000000
1030.000000
1030.000000
1030.000000
1030.000000
1030.000000
1030.000000
1030.000000
1030.000000
1030.000000
1030.000000
1030.000000
1030.000000
1030.000000
1030.000000
1030.000000
1030.000000
1030.000000
1030.000000
1030.000000
1030.000000
1030.000000
1030.000000
1030.000000
1030.000000
1030.000000
1030.000000
1030.000000
1030.000000
1030.000000
1030.000000
1030.000000
1030.000000
1030.000000
1030.000000
1030.000000
1030.000000
1030.000000
1030.000000
1030.000000
1030.000000
1030.000000
1030.000000
1030.000000
1030.000000
1030.000000
1030.000000
1030.000000
1030.000000
1030.000000
1030.000000
1030.000000
1030.000000
1030.000000
1030.000000
1030.000000
1030.000000
1030.000000
1030.000000
1030.000000
1030.000000
1030.000000
1030.000000
1030.000000
1030.000000
1030.000000
1030.000000
1030.000000
1030.000000
1030.000000
1030.000000
1030.000000
1030.000000
1030.000000
1030.000000
1030.000000
1030.000000
1030.000000
1030.000000
1030.000000
1030.000000
1030.000000
1030.000000
1030.000000
1030.000000
1030.000000
1030.000000
1030.000000
1030.000000
1030.000000
1030.000000
1030.000000
1030.000000
1030.000000
1030.000000
1030.000000
1030.000000
1030.000000
1030.000000
1030.000000
1030.000000
1030.000000
1030.000000
1030.000000
1030.000000
1030.000000
1030.000000
1030.000000
1030.000000
1030.000000
1030.000000
1030.000000
1030.000000
1030.000000
1030.000000
1030.000000
1030.000000
1030.000000
1030.000000
1030.000000
1030.000000
1030.000000
1030.000000
1030.000000
1030.000000
1030.000000
1030.000000
1030.000000
1030.000000
1030.000000
1030.000000
1030.000000
1030.000000
1030.000000
1030.000000
1030.000000
1030.000000
1030.000000
1030.000000
1030.000000
1030.000000
1030.000000
1030.000000
1030.000000
1030.000000
1030.000000
1030.000000
1030.000000
1030.000000
1030.000000
1030.000000
1030.000000
1030.000000
1030.000000
1030.000000
1030.000000
1030.000000
1030.000000
1030.000000
1030.000000
1030.000000
1030.000000
1030.000000
1030.000000
1030.000000
1030.000000
1030.000000
1030.000000
1030.000000
1030.000000
1030.000000
1030.000000
1030.000000
1030.000000
1030.000000
1030.000000
1030.000000
1030.000000
1030.000000
1030.000000
1030.000000
1030.000000
1030.000000
1030.000000
1030.000000
1030.000000
1030.000000
1030.000000
1030.000000
1030.000000
1030.000000
1030.000000
1030.000000
1030.000000
1030.000000
1030.000000
1030.000000
1030.000000
1030.000000
1030.000000
1030.000000
1030.000000
1030.000000
1030.000000
1030.000000
1030.000000
1030.000000
1030.000000
1030.000000
1030.000000
1030.000000
1030.000000
1030.000000
1030.000000
1030.000000
1030.000000
1030.000000
1030.000000
1030.000000
1030.000000
1030.000000
1030.000000
1030.000000
1030.000000
1030.000000
1030.000000
1030.000000
1030.000000
1030.000000
1030.000000
1030.000000
1030.000000
1030.000000
1030.000000
1030.000000
1030.000000
1030.000000
1030.000000
1030.000000
1030.000000
1030.000000
1030.000000
1030.000000
1030.000000
1030.000000
1030.000000
1030.000000
1030.000000
1030.000000
1030.000000
1030.000000
1030.000000
1030.000000
1030.000000
1030.000000
1030.000000
1030.000000
1030.000000
1030.000000
1030.000000
1030.000000
1030.000000
1030.000000
1030.000000
1030.000000
1030.000000
1030.000000
1030.000000
1030.000000
1030.000000
1030.000000
1030.000000
1030.000000
1030.000000
1030.000000
1030.000000
1030.000000
1030.000000
1030.000000
1030.000000
1030.000000
1030.000000
1030.000000
1030.000000
1030.000000
1030.000000
1030.000000
1030.000000
1030.000000
1030.000000
1030.000000
1030.000000
1030.000000
1030.000000
1030.000000
1030.000000
1030.000000
1030.000000
1030.000000
1030.000000
1030.000000
1030.000000
1030.000000
1030.000000
1030.000000
1030.000000
1030.000000
1030.000000
1030.000000
1030.000000
1030.000000
1030.000000
1030.000000
1030.000000
1030.000000
1030.000000
1030.000000
1030.000000
1030.000000
1030.000000
1030.000000
1030.000000
1030.000000
1030.000000
1030.000000
1030.000000
1030.000000
1030.000000
1030.000000
1030.000000
1030.000000
1030.000000
1030.000000
1030.000000
1030.000000
1030.000000
1030.000000
1030.000000
1030.000000
1030.000000
1030.000000
1030.000000
1030.000000
1030.000000
1030.000000
1030.000000
1030.000000
1030.000000
1030.000000
1030.000000
1030.000000
1030.000000
1030.000000
1030.000000
1030.000000
1030.000000
1030.000000
1030.000000
1030.000000
1030.000000
1030.000000
1030.000000
1030.000000
1030.000000
1030.000000
1030.000000
1030.000000
1030.000000
1030.000000
1030.000000
1030.000000
1030.000000
1030.000000
1030.000000
1030.000000
1030.000000
1030.000000
1030.000000
1030.000000
1030.000000
1030.000000
1030.000000
1030.000000
1030.000000
1030.000000
1030.000000
1030.000000
1030.000000
1030.000000
1030.000000
1030.000000
1030.000000
1030.000000
1030.000000
1030.000000
1030.000000
1030.000000
1030.000000
1030.000000
1030.000000
1030.000000
1030.000000
1030.000000
1030.000000
1030.000000
1030.000000
1030.000000
1030.000000
1030.000000
1030.000000
1030.000000
1030.000000
1030.000000
1030.000000
1030.000000
1030.000000
1030.000000
1030.000000
1030.000000
1030.000000
1030.000000
1030.000000
1030.000000
1030.000000
1030.000000
1030.000000
1030.000000
1030.000000
1030.000000
1030.000000
1030.000000
1030.000000
1030.000000
1030.000000
1030.000000
1030.000000
1030.000000
1030.000000
1030.000000
1030.000000
1030.000000
1030.000000
1030.000000
1030.000000
1030.000000
1030.000000
1030.000000
1030.000000
1030.000000
1030.000000
1030.000000
1030.000000
1030.000000
1030.000000
1030.000000
1030.000000
1030.000000
1030.000000
1030.000000
1030.000000
1030.000000
1030.000000
1030.000000
1030.000000
1030.000000
1030.000000
1030.000000
1030.000000
1030.000000
1030.000000
1030.000000
1030.000000
1030.000000
1030.000000
1030.000000
1030.000000
1030.000000
1030.000000
1030.000000
1030.000000
1030.000000
1030.000000
1030.000000
1030.000000
1030.000000
1030.000000
1030.000000
1030.000000
1030.000000
1030.000000
1030.000000
1030.000000
1030.000000
1030.000000
1030.000000
1030.000000
1030.000000
1030.000000
1030.000000
1030.000000
1030.000000
1030.000000
1030.000000
1030.000000
1030.000000
1030.000000
1030.000000
1030.000000
1030.000000
1030.000000
1030.000000
1030.000000
1030.000000
1030.000000
1030.000000
1030.000000
1030.000000
1030.000000
1030.000000
1030.000000
1030.000000
1030.000000
1030.000000
1030.000000
1030.000000
1030.000000
1030.000000
1030.000000
1030.000000
1030.000000
1030.000000
1030.000000
1030.000000
1030.000000
1030.000000
1030.000000
1030.000000
1030.000000
1030.000000
1030.000000
1030.000000
1030.000000
1030.000000
1030.000000
1030.000000
1030.000000
1030.000000
1030.000000
1030.000000
1030.000000
1030.000000
1030.000000
1030.000000
1030.000000
1030.000000
1030.000000
1030.000000
1030.000000
1030.000000
1030.000000
1030.000000
1030.000000
1030.000000
1030.000000
1030.000000
1030.000000
1030.000000
1030.000000
1030.000000
1030.000000
1030.000000
1030.000000
1030.000000
1030.000000
1030.000000
1030.000000
1030.000000
1030.000000
1030.000000
1030.000000
1030.000000
1030.000000
1030.000000
1030.000000
1030.000000
1030.000000
1030.000000
1030.000000
1030.000000
1030.000000
1030.000000
1030.000000
1030.000000
1030.000000
1030.000000
1030.000000
1030.000000
1030.000000
1030.000000
1030.000000
1030.000000
1030.000000
1030.000000
1030.000000
1030.000000
1030.000000
1030.000000
1030.000000
1030.000000
1030.000000
1030.000000
1030.000000
1030.000000
1030.000000
1030.000000
1030.000000
1030.000000
1030.000000
1030.000000
1030.000000
1030.000000
1030.000000
1030.000000
1030.000000
1030.000000
1030.000000
1030.000000
1030.000000
1030.000000
1030.000000
1030.000000
1030.000000
1030.000000
1030.000000
1030.000000
1030.000000
1030.000000
1030.000000
1030.000000
1030.000000
1030.000000
1030.000000
1030.000000
1030.000000
1030.000000
1030.000000
1030.000000
1030.000000
1030.000000
1030.000000
1030.000000
1030.000000
1030.000000
1030.000000
1030.000000
1030.000000
1030.000000
1030.000000
1030.000000
1030.000000
1030.000000
1030.000000
1030.000000
1030.000000
1030.000000
1030.000000
1030.000000
1030.000000
1030.000000
1030.000000
1030.000000
1030.000000
1030.000000
1030.000000
1030.000000
1030.000000
1030.000000
1030.000000
1030.000000
1030.000000
1030.000000
1030.000000
1030.000000
1030.000000
1030.000000
1030.000000
1030.000000
1030.000000
1030.000000
1030.000000
1030.000000
1030.000000
1030.000000
1030.000000
1030.000000
1030.000000
1030.000000
1030.000000
1030.000000
1030.000000
1030.000000
1030.000000
1030.000000
1030.000000
1030.000000
1030.000000
1030.000000
1030.000000
1030.000000
1030.000000
1030.000000
1030.000000
1030.000000
1030.000000
1030.000000
1030.000000
1030.000000
1030.000000
1030.000000
1030.000000
1030.000000
1030.000000
1030.000000
1030.000000
1030.000000
1030.000000
1030.000000
1030.000000
1030.000000
1030.000000
1030.000000
1030.000000
1030.000000
1030.000000
1030.000000
1030.000000
1030.000000
1030.000000
1030.000000
1030.000000
1030.000000
1030.000000
1030.000000
1030.000000
1030.000000
1030.000000
1030.000000
1030.000000
1030.000000
1030.000000
1030.000000
1030.000000
1030.000000
1030.000000
1030.000000
1030.000000
1030.000000
1030.000000
1030.000000
1030.000000
1030.000000
1030.000000
1030.000000
1030.000000
1030.000000
1030.000000
1030.000000
1030.000000
1030.000000
1030.000000
1030.000000
1030.000000
1030.000000
1030.000000
1030.000000
1030.000000
1030.000000
1030.000000
1030.000000
1030.000000
1030.000000
1030.000000
1030.000000
1030.000000
1030.000000
1030.000000
1030.000000
1030.000000
1030.000000
1030.000000
1030.000000
1030.000000
1030.000000
1030.000000
1030.000000
1030.000000
1030.000000
1030.000000
1030.000000
1030.000000
1030.000000
1030.000000
1030.000000
1030.000000
1030.000000
1030.000000
1030.000000
1030.000000
1030.000000
1030.000000
1030.000000
1030.000000
1030.000000
1030.000000
1030.000000
1030.000000
1030.000000
1030.000000
1030.000000
1030.000000
1030.000000
1030.000000
1030.000000
1030.000000
1030.000000
1030.000000
1030.000000
1030.000000
1030.000000
1030.000000
1030.000000
1030.000000
1030.000000
1030.000000
1030.000000
1030.000000
1030.000000
1030.000000
1030.000000
1030.000000
1030.000000
1030.000000
1030.000000
1030.000000
1030.000000
1030.000000
1030.000000
1030.000000
1030.000000
1030.000000
1030.000000
1030.000000
1030.000000
1030.000000
1030.000000
1030.000000
1030.000000
1030.000000
1030.000000
1030.000000
1030.000000
1030.000000
1030.000000
1030.000000
1030.000000
1030.000000
1030.000000
1030.000000
1030.000000
1030.000000
1030.000000
1030.000000
1030.000000
1030.000000
1030.000000
1030.000000
1030.000000
1030.000000
1030.000000
1030.000000
1030.000000
1030.000000
1030.000000
1030.000000
1030.000000
1030.000000
1030.000000
1030.000000
1030.000000
1030.000000
1030.000000
1030.000000
1030.000000
1030.000000
1030.000000
1030.000000
1030.000000
1030.000000
1030.000000
1030.000000
1030.000000
1030.000000
1030.000000
1030.000000
1030.000000
1030.000000
1030.000000
1030.000000
1030.000000
1030.000000
1030.000000
1030.000000
1030.000000
1030.000000
1030.000000
1030.000000
1030.000000
1030.000000
1030.000000
1030.000000
1030.000000
1030.000000
1030.000000
1030.000000
1030.000000
1030.000000
1030.000000
1030.000000
1030.000000
1030.000000
1030.000000
1030.000000
1030.000000
1030.000000
1030.000000
1030.000000
1030.000000
1030.000000
1030.000000
1030.000000
1030.000000
1030.000000
1030.000000
1030.000000
1030.000000
1030.000000
1030.000000
1030.000000
1030.000000
1030.000000
1030.000000
1030.000000
1030.000000
1030.000000
1030.000000
1030.000000
1030.000000
1030.000000
1030.000000
1030.000000
1030.000000
1030.000000
1030.000000
1030.000000
1030.000000
1030.000000
1030.000000
1030.000000
1030.000000
1030.000000
1030.000000
1030.000000
1030.000000
1030.000000
1030.000000
1030.000000
1030.000000
1030.000000
1030.000000
1030.000000
1030.000000
1030.000000
1030.000000
1030.000000
1030.000000
1030.000000
1030.000000
1030.000000
1030.000000
1030.000000
1030.000000
1030.000000
1030.000000
1030.000000
1030.000000
1030.000000
1030.000000
1030.000000
1030.000000
1030.000000
1030.000000
1030.000000
1030.000000
1030.000000
1030.000000
1030.000000
1030.000000
1030.000000
1030.000000
1030.000000
1030.000000
1030.000000
1030.000000
1030.000000
1030.000000
1030.000000
1030.000000
1030.000000
1030.000000
1030.000000
1030.000000
1030.000000
1030.000000
1030.000000
1030.000000
1030.000000
1030.000000
1030.000000
1030.000000
1030.000000
1030.000000
1030.000000
1030.000000
1030.000000
1030.000000
1030.000000
1030.000000
1030.000000
1030.000000
1030.000000
1030.000000
1030.000000
1030.000000
1030.000000
1030.000000
1030.000000
1030.000000
1030.000000
1030.000000
1030.000000
1030.000000
1030.000000
1030.000000
1030.000000
1030.000000
1030.000000
1030.000000
1030.000000
1030.000000
1030.000000
1030.000000
1030.000000
1030.000000
1030.000000
1030.000000
1030.000000
1030.000000
1030.000000
1030.000000
1030.000000
1030.000000
1030.000000
1030.000000
1030.000000
1030.000000
1030.000000
1030.000000
1030.000000
1030.000000
1030.000000
1030.000000
1030.000000
1030.000000
1030.000000
1030.000000
1030.000000
1030.000000
1030.000000
1030.000000
1030.000000
1030.000000
1030.000000
1030.000000
1030.000000
1030.000000
1030.000000
1030.000000
1030.000000
1030.000000
1030.000000
1030.000000
1030.000000
1030.000000
1030.000000
1030.000000
1030.000000
1030.000000
1030.000000
1030.000000
1030.000000
1030.000000
1030.000000
1030.000000
1030.000000
1030.000000
1030.000000
1030.000000
1030.000000
1030.000000
1030.000000
1030.000000
1030.000000
1030.000000
1030.000000
1030.000000
1030.000000
1030.000000
1030.000000
1030.000000
1030.000000
1030.000000
1030.000000
1030.000000
1030.000000
1030.000000
1030.000000
1030.000000
1030.000000
1030.000000
1030.000000
1030.000000
1030.000000
1030.000000
1030.000000
1030.000000
1030.000000
1030.000000
1030.000000
1030.000000
1030.000000
1030.000000
1030.000000
1030.000000
1030.000000
1030.000000
1030.000000
1030.000000
1030.000000
1030.000000
1030.000000
1030.000000
1030.000000
1030.000000
1030.000000
1030.000000
1030.000000
1030.000000
1030.000000
1030.000000
1030.000000
1030.000000
1030.000000
1030.000000
1030.000000
1030.000000
1030.000000
1030.000000
1030.000000
1030.000000
1030.000000
1030.000000
1030.000000
1030.000000
1030.000000
1030.000000
1030.000000
1030.000000
1030.000000
1030.000000
1030.000000
1030.000000
1030.000000
1030.000000
1030.000000
1030.000000
1030.000000
1030.000000
1030.000000
1030.000000
1030.000000
1030.000000
1030.000000
1030.000000
1030.000000
1030.000000
1030.000000
1030.000000
1030.000000
1030.000000
1030.000000
1030.000000
1030.000000
1030.000000
1030.000000
1030.000000
1030.000000
1030.000000
1030.000000
1030.000000
1030.000000
1030.000000
1030.000000
1030.000000
1030.000000
1030.000000
1030.000000
1030.000000
1030.000000
1030.000000
1030.000000
1030.000000
1030.000000
1030.000000
1030.000000
1030.000000
1030.000000
1030.000000
1030.000000
1030.000000
1030.000000
1030.000000
1030.000000
1030.000000
1030.000000
1030.000000
1030.000000
1030.000000
1030.000000
1030.000000
1030.000000
1030.000000
1030.000000
1030.000000
1030.000000
1030.000000
1030.000000
1030.000000
1030.000000
1030.000000
1030.000000
1030.000000
1030.000000
1030.000000
1030.000000
1030.000000
1030.000000
1030.000000
1030.000000
1030.000000
1030.000000
1030.000000
1030.000000
1030.000000
1030.000000
1030.000000
1030.000000
1030.000000
1030.000000
1030.000000
1030.000000
1030.000000
1030.000000
1030.000000
1030.000000
1030.000000
1030.000000
1030.000000
1030.000000
1030.000000
1030.000000
1030.000000
1030.000000
1030.000000
1030.000000
1030.000000
1030.000000
1030.000000
1030.000000
1030.000000
1030.000000
1030.000000
1030.000000
1030.000000
1030.000000
1030.000000
1030.000000
1030.000000
1030.000000
1030.000000
1030.000000
1030.000000
1030.000000
1030.000000
1030.000000
1030.000000
1030.000000
1030.000000
1030.000000
1030.000000
1030.000000
1030.000000
1030.000000
1030.000000
1030.000000
1030.000000
1030.000000
1030.000000
1030.000000
1030.000000
1030.000000
1030.000000
1030.000000
1030.000000
1030.000000
1030.000000
1030.000000
1030.000000
1030.000000
1030.000000
1030.000000
1030.000000
1030.000000
1030.000000
1030.000000
1030.000000
1030.000000
1030.000000
1030.000000
1030.000000
1030.000000
1030.000000
1030.000000
1030.000000
1030.000000
1030.000000
1030.000000
1030.000000
1030.000000
1030.000000
1030.000000
1030.000000
1030.000000
1030.000000
1030.000000
1030.000000
1030.000000
1030.000000
1030.000000
1030.000000
1030.000000
1030.000000
1030.000000
1030.000000
1030.000000
1030.000000
1030.000000
1030.000000
1030.000000
1030.000000
1030.000000
1030.000000
1030.000000
1030.000000
1030.000000
1030.000000
1030.000000
1030.000000
1030.000000
1030.000000
1030.000000
1030.000000
1030.000000
1030.000000
1030.000000
1030.000000
1030.000000
1030.000000
1030.000000
1030.000000
1030.000000
1030.000000
1030.000000
1030.000000
1030.000000
1030.000000
1030.000000
1030.000000
1030.000000
1030.000000
1030.000000
1030.000000
1030.000000
1030.000000
1030.000000
1030.000000
1030.000000
1030.000000
1030.000000
1030.000000
1030.000000
1030.000000
1030.000000
1030.000000
1030.000000
1030.000000
1030.000000
1030.000000
1030.000000
1030.000000
1030.000000
1030.000000
1030.000000
1030.000000
1030.000000
1030.000000
1030.000000
1030.000000
1030.000000
1030.000000
1030.000000
1030.000000
1030.000000
1030.000000
1030.000000
1030.000000
1030.000000
1030.000000
1030.000000
1030.000000
1030.000000
1030.000000
1030.000000
1030.000000
1030.000000
1030.000000
1030.000000
1030.000000
1030.000000
1030.000000
1030.000000
1030.000000
1030.000000
1030.000000
1030.000000
1030.000000
1030.000000
1030.000000
1030.000000
1030.000000
1030.000000
1030.000000
1030.000000
1030.000000
1030.000000
1030.000000
1030.000000
1030.000000
1030.000000
1030.000000
1030.000000
1030.000000
1030.000000
1030.000000
1030.000000
1030.000000
1030.000000
1030.000000
1030.000000
1030.000000
1030.000000
1030.000000
1030.000000
1030.000000
1030.000000
1030.000000
1030.000000
1030.000000
1030.000000
1030.000000
1030.000000
1030.000000
1030.000000
1030.000000
1030.000000
1030.000000
1030.000000
1030.000000
1030.000000
1030.000000
1030.000000
1030.000000
1030.000000
1030.000000
1030.000000
1030.000000
1030.000000
1030.000000
1030.000000
1030.000000
1030.000000
1030.000000
1030.000000
1030.000000
1030.000000
1030.000000
1030.000000
1030.000000
1030.000000
1030.000000
1030.000000
1030.000000
1030.000000
1030.000000
1030.000000
1030.000000
1030.000000
1030.000000
1030.000000
1030.000000
1030.000000
1030.000000
1030.000000
1030.000000
1030.000000
1030.000000
1030.000000
1030.000000
1030.000000
1030.000000
1030.000000
1030.000000
1030.000000
1030.000000
1030.000000
1030.000000
1030.000000
1030.000000
1030.000000
1030.000000
1030.000000
1030.000000
1030.000000
1030.000000
1030.000000
1030.000000
1030.000000
1030.000000
1030.000000
1030.000000
1030.000000
1030.000000
1030.000000
1030.000000
1030.000000
1030.000000
1030.000000
1030.000000
1030.000000
1030.000000
1030.000000
1030.000000
1030.000000
1030.000000
1030.000000
1030.000000
1030.000000
1030.000000
1030.000000
1030.000000
1030.000000
1030.000000
1030.000000
1030.000000
1030.000000
1030.000000
1030.000000
1030.000000
1030.000000
1030.000000
1030.000000
1030.000000
1030.000000
1030.000000
1030.000000
1030.000000
1030.000000
1030.000000
1030.000000
1030.000000
1030.000000
1030.000000
1030.000000
1030.000000
1030.000000
1030.000000
1030.000000
1030.000000
1030.000000
1030.000000
1030.000000
1030.000000
1030.000000
1030.000000
1030.000000
1030.000000
1030.000000
1030.000000
1030.000000
1030.000000
1030.000000
1030.000000
1030.000000
1030.000000
1030.000000
1030.000000
1030.000000
1030.000000
1030.000000
1030.000000
1030.000000
1030.000000
1030.000000
1030.000000
1030.000000
1030.000000
1030.000000
1030.000000
1030.000000
1030.000000
1030.000000
1030.000000
1030.000000
1030.000000
1030.000000
1030.000000
1030.000000
1030.000000
1030.000000
1030.000000
1030.000000
1030.000000
1030.000000
1030.000000
1030.000000
1030.000000
1030.000000
1030.000000
1030.000000
1030.000000
1030.000000
1030.000000
1030.000000
1030.000000
1030.000000
1030.000000
1030.000000
1030.000000
1030.000000
1030.000000
1030.000000
1030.000000
1030.000000
1030.000000
1030.000000
1030.000000
1030.000000
1030.000000
1030.000000
1030.000000
1030.000000
1030.000000
1030.000000
1030.000000
1030.000000
1030.000000
1030.000000
1030.000000
1030.000000
1030.000000
1030.000000
1030.000000
1030.000000
1030.000000
1030.000000
1030.000000
1030.000000
1030.000000
1030.000000
1030.000000
1030.000000
1030.000000
1030.000000
1030.000000
1030.000000
1030.000000
1030.000000
1030.000000
1030.000000
1030.000000
1030.000000
1030.000000
1030.000000
1030.000000
1030.000000
1030.000000
1030.000000
1030.000000
1030.000000
1030.000000
1030.000000
1030.000000
1030.000000
1030.000000
1030.000000
1030.000000
1030.000000
1030.000000
1030.000000
1030.000000
1030.000000
1030.000000
1030.000000
1030.000000
1030.000000
1030.000000
1030.000000
1030.000000
1030.000000
1030.000000
1030.000000
1030.000000
1030.000000
1030.000000
1030.000000
1030.000000
1030.000000
1030.000000
1030.000000
1030.000000
1030.000000
1030.000000
1030.000000
1030.000000
1030.000000
1030.000000
1030.000000
1030.000000
1030.000000
1030.000000
1030.000000
1030.000000
1030.000000
1030.000000
1030.000000
1030.000000
1030.000000
1030.000000
1030.000000
1030.000000
1030.000000
1030.000000
1030.000000
1030.000000
1030.000000
1030.000000
1030.000000
1030.000000
1030.000000
1030.000000
1030.000000
1030.000000
1030.000000
1030.000000
1030.000000
1030.000000
1030.000000
1030.000000
1030.000000
1030.000000
1030.000000
1030.000000
1030.000000
1030.000000
1030.000000
1030.000000
1030.000000
1030.000000
1030.000000
1030.000000
1030.000000
1030.000000
1030.000000
1030.000000
1030.000000
1030.000000
1030.000000
1030.000000
1030.000000
1030.000000
1030.000000
1030.000000
1030.000000
1030.000000
1030.000000
1030.000000
1030.000000
1030.000000
1030.000000
1030.000000
1030.000000
1030.000000
1030.000000
1030.000000
1030.000000
1030.000000
1030.000000
1030.000000
1030.000000
1030.000000
1030.000000
1030.000000
1030.000000
1030.000000
1030.000000
1030.000000
1030.000000
1030.000000
1030.000000
1030.000000
1030.000000
1030.000000
1030.000000
1030.000000
1030.000000
1030.000000
1030.000000
1030.000000
1030.000000
1030.000000
1030.000000
1030.000000
1030.000000
1030.000000
1030.000000
1030.000000
1030.000000
1030.000000
1030.000000
1030.000000
1030.000000
1030.000000
1030.000000
1030.000000
1030.000000
1030.000000
1030.000000
1030.000000
1030.000000
1030.000000
1030.000000
1030.000000
1030.000000
1030.000000
1030.000000
1030.000000
1030.000000
1030.000000
1030.000000
1030.000000
1030.000000
1030.000000
1030.000000
1030.000000
1030.000000
1030.000000
1030.000000
1030.000000
1030.000000
1030.000000
1030.000000
1030.000000
1030.000000
1030.000000
1030.000000
1030.000000
1030.000000
1030.000000
1030.000000
1030.000000
1030.000000
1030.000000
1030.000000
1030.000000
1030.000000
1030.000000
1030.000000
1030.000000
1030.000000
1030.000000
1030.000000
1030.000000
1030.000000
1030.000000
1030.000000
1030.000000
1030.000000
1030.000000
1030.000000
1030.000000
1030.000000
1030.000000
1030.000000
1030.000000
1030.000000
1030.000000
1030.000000
1030.000000
1030.000000
1030.000000
1030.000000
1030.000000
1030.000000
1030.000000
1030.000000
1030.000000
1030.000000
1030.000000
1030.000000
1030.000000
1030.000000
1030.000000
1030.000000
1030.000000
1030.000000
1030.000000
1030.000000
1030.000000
1030.000000
1030.000000
1030.000000
1030.000000
1030.000000
1030.000000
1030.000000
1030.000000
1030.000000
1030.000000
1030.000000
1030.000000
1030.000000
1030.000000
1030.000000
1030.000000
1030.000000
1030.000000
1030.000000
1030.000000
1030.000000
1030.000000
1030.000000
1030.000000
1030.000000
1030.000000
1030.000000
1030.000000
1030.000000
1030.000000
1030.000000
1030.000000
1030.000000
1030.000000
1030.000000
1030.000000
1030.000000
1030.000000
1030.000000
1030.000000
1030.000000
1030.000000
1030.000000
1030.000000
1030.000000
1030.000000
1030.000000
1030.000000
1030.000000
1030.000000
1030.000000
1030.000000
1030.000000
1030.000000
1030.000000
1030.000000
1030.000000
1030.000000
1030.000000
1030.000000
1030.000000
1030.000000
1030.000000
1030.000000
1030.000000
1030.000000
1030.000000
1030.000000
1030.000000
1030.000000
1030.000000
1030.000000
1030.000000
1030.000000
1030.000000
1030.000000
1030.000000
1030.000000
1030.000000
1030.000000
1030.000000
1030.000000
1030.000000
1030.000000
1030.000000
1030.000000
1030.000000
1030.000000
1030.000000
1030.000000
1030.000000
1030.000000
1030.000000
1030.000000
1030.000000
1030.000000
1030.000000
1030.000000
1030.000000
1030.000000
1030.000000
1030.000000
1030.000000
1030.000000
1030.000000
1030.000000
1030.000000
1030.000000
1030.000000
1030.000000
1030.000000
1030.000000
1030.000000
1030.000000
1030.000000
1030.000000
1030.000000
1030.000000
1030.000000
1030.000000
1030.000000
1030.000000
1030.000000
1030.000000
1030.000000
1030.000000
1030.000000
1030.000000
1030.000000
1030.000000
1030.000000
1030.000000
1030.000000
1030.000000
1030.000000
1030.000000
1030.000000
1030.000000
1030.000000
1030.000000
1030.000000
1030.000000
1030.000000
1030.000000
1030.000000
1030.000000
1030.000000
1030.000000
1030.000000
1030.000000
1030.000000
1030.000000
1030.000000
1030.000000
1030.000000
1030.000000
1030.000000
1030.000000
1030.000000
1030.000000
1030.000000
1030.000000
1030.000000
1030.000000
1030.000000
1030.000000
1030.000000
1030.000000
1030.000000
1030.000000
1030.000000
1030.000000
1030.000000
1030.000000
1030.000000
1030.000000
1030.000000
1030.000000
1030.000000
1030.000000
1030.000000
1030.000000
1030.000000
1030.000000
1030.000000
1030.000000
1030.000000
1030.000000
1030.000000
1030.000000
1030.000000
1030.000000
1030.000000
1030.000000
1030.000000
1030.000000
1030.000000
1030.000000
1030.000000
1030.000000
1030.000000
1030.000000
1030.000000
1030.000000
1030.000000
1030.000000
1030.000000
1030.000000
1030.000000
1030.000000
1030.000000
1030.000000
1030.000000
1030.000000
1030.000000
1030.000000
1030.000000
1030.000000
1030.000000
1030.000000
1030.000000
1030.000000
1030.000000
1030.000000
1030.000000
1030.000000
1030.000000
1030.000000
1030.000000
1030.000000
1030.000000
1030.000000
1030.000000
1030.000000
1030.000000
1030.000000
1030.000000
1030.000000
1030.000000
1030.000000
1030.000000
1030.000000
1030.000000
1030.000000
1030.000000
1030.000000
1030.000000
1030.000000
1030.000000
1030.000000
1030.000000
1030.000000
1030.000000
1030.000000
1030.000000
1030.000000
1030.000000
1030.000000
1030.000000
1030.000000
1030.000000
1030.000000
1030.000000
1030.000000
1030.000000
1030.000000
1030.000000
1030.000000
1030.000000
1030.000000
1030.000000
1030.000000
1030.000000
1030.000000
1030.000000
1030.000000
1030.000000
1030.000000
1030.000000
1030.000000
1030.000000
1030.000000
1030.000000
1030.000000
1030.000000
1030.000000
1030.000000
1030.000000
1030.000000
1030.000000
1030.000000
1030.000000
1030.000000
1030.000000
1030.000000
1030.000000
1030.000000
1030.000000
1030.000000
1030.000000
1030.000000
1030.000000
1030.000000
1030.000000
1030.000000
1030.000000
1030.000000
1030.000000
1030.000000
1030.000000
1030.000000
1030.000000
1030.000000
1030.000000
1030.000000
1030.000000
1030.000000
1030.000000
1030.000000
1030.000000
1030.000000
1030.000000
1030.000000
1030.000000
1030.000000
1030.000000
1030.000000
1030.000000
1030.000000
1030.000000
1030.000000
1030.000000
1030.000000
1030.000000
1030.000000
1030.000000
1030.000000
1030.000000
1030.000000
1030.000000
1030.000000
1030.000000
1030.000000
1030.000000
1030.000000
1030.000000
1030.000000
1030.000000
1030.000000
1030.000000
1030.000000
1030.000000
1030.000000
1030.000000
1030.000000
1030.000000
1030.000000
1030.000000
1030.000000
1030.000000
1030.000000
1030.000000
1030.000000
1030.000000
1030.000000
1030.000000
1030.000000
1030.000000
1030.000000
1030.000000
1030.000000
1030.000000
1030.000000
1030.000000
1030.000000
1030.000000
1030.000000
1030.000000
1030.000000
1030.000000
1030.000000
1030.000000
1030.000000
1030.000000
1030.000000
1030.000000
1030.000000
1030.000000
1030.000000
1030.000000
1030.000000
1030.000000
1030.000000
1030.000000
1030.000000
1030.000000
1030.000000
1030.000000
1030.000000
1030.000000
1030.000000
1030.000000
1030.000000
1030.000000
1030.000000
1030.000000
1030.000000
1030.000000
1030.000000
1030.000000
1030.000000
1030.000000
1030.000000
1030.000000
1030.000000
1030.000000
1030.000000
1030.000000
1030.000000
1030.000000
1030.000000
1030.000000
1030.000000
1030.000000
1030.000000
1030.000000
1030.000000
1030.000000
1030.000000
1030.000000
1030.000000
1030.000000
1030.000000
1030.000000
1030.000000
1030.000000
1030.000000
1030.000000
1030.000000
1030.000000
1030.000000
1030.000000
1030.000000
1030.000000
1030.000000
1030.000000
1030.000000
1030.000000
1030.000000
1030.000000
1030.000000
1030.000000
1030.000000
1030.000000
1030.000000
1030.000000
1030.000000
1030.000000
1030.000000
1030.000000
1030.000000
1030.000000
1030.000000
1030.000000
1030.000000
1030.000000
1030.000000
1030.000000
1030.000000
1030.000000
1030.000000
1030.000000
1030.000000
1030.000000
1030.000000
1030.000000
1030.000000
1030.000000
1030.000000
1030.000000
1030.000000
1030.000000
1030.000000
1030.000000
1030.000000
1030.000000
1030.000000
1030.000000
1030.000000
1030.000000
1030.000000
1030.000000
1030.000000
1030.000000
1030.000000
1030.000000
1030.000000
1030.000000
1030.000000
1030.000000
1030.000000
1030.000000
1030.000000
1030.000000
1030.000000
1030.000000
1030.000000
1030.000000
1030.000000
1030.000000
1030.000000
1030.000000
1030.000000
1030.000000
1030.000000
1030.000000
1030.000000
1030.000000
1030.000000
1030.000000
1030.000000
1030.000000
1030.000000
1030.000000
1030.000000
1030.000000
1030.000000
1030.000000
1030.000000
1030.000000
1030.000000
1030.000000
1030.000000
1030.000000
1030.000000
1030.000000
1030.000000
1030.000000
1030.000000
1030.000000
1030.000000
1030.000000
1030.000000
1030.000000
1030.000000
1030.000000
1030.000000
1030.000000
1030.000000
1030.000000
1030.000000
1030.000000
1030.000000
1030.000000
1030.000000
1030.000000
1030.000000
1030.000000
1030.000000
1030.000000
1030.000000
1030.000000
1030.000000
1030.000000
1030.000000
1030.000000
1030.000000
1030.000000
1030.000000
1030.000000
1030.000000
1030.000000
1030.000000
1030.000000
1030.000000
1030.000000
1030.000000
1030.000000
1030.000000
1030.000000
1030.000000
1030.000000
1030.000000
1030.000000
1030.000000
1030.000000
1030.000000
1030.000000
1030.000000
1030.000000
1030.000000
1030.000000
1030.000000
1030.000000
1030.000000
1030.000000
1030.000000
1030.000000
1030.000000
1030.000000
1030.000000
1030.000000
1030.000000
1030.000000
1030.000000
1030.000000
1030.000000
1030.000000
1030.000000
1030.000000
1030.000000
1030.000000
1030.000000
1030.000000
1030.000000
1030.000000
1030.000000
1030.000000
1030.000000
1030.000000
1030.000000
1030.000000
1030.000000
1030.000000
1030.000000
1030.000000
1030.000000
1030.000000
1030.000000
1030.000000
1030.000000
1030.000000
1030.000000
1030.000000
1030.000000
1030.000000
1030.000000
1030.000000
1030.000000
1030.000000
1030.000000
1030.000000
1030.000000
1030.000000
1030.000000
1030.000000
1030.000000
1030.000000
1030.000000
1030.000000
1030.000000
1030.000000
1030.000000
1030.000000
1030.000000
1030.000000
1030.000000
1030.000000
1030.000000
1030.000000
1030.000000
1030.000000
1030.000000
1030.000000
1030.000000
1030.000000
1030.000000
1030.000000
1030.000000
1030.000000
1030.000000
1030.000000
1030.000000
1030.000000
1030.000000
1030.000000
1030.000000
1030.000000
1030.000000
1030.000000
1030.000000
1030.000000
1030.000000
1030.000000
1030.000000
1030.000000
1030.000000
1030.000000
1030.000000
1030.000000
1030.000000
1030.000000
1030.000000
1030.000000
1030.000000
1030.000000
1030.000000
1030.000000
1030.000000
1030.000000
1030.000000
1030.000000
1030.000000
1030.000000
1030.000000
1030.000000
1030.000000
1030.000000
1030.000000
1030.000000
1030.000000
1030.000000
1030.000000
1030.000000
1030.000000
1030.000000
1030.000000
1030.000000
1030.000000
1030.000000
1030.000000
1030.000000
1030.000000
1030.000000
1030.000000
1030.000000
1030.000000
1030.000000
1030.000000
1030.000000
1030.000000
1030.000000
1030.000000
1030.000000
1030.000000
1030.000000
1030.000000
1030.000000
1030.000000
1030.000000
1030.000000
1030.000000
1030.000000
1030.000000
1030.000000
1030.000000
1030.000000
1030.000000
1030.000000
1030.000000
1030.000000
1030.000000
1030.000000
1030.000000
1030.000000
1030.000000
1030.000000
1030.000000
1030.000000
1030.000000
1030.000000
1030.000000
1030.000000
1030.000000
1030.000000
1030.000000
1030.000000
1030.000000
1030.000000
1030.000000
1030.000000
1030.000000
1030.000000
1030.000000
1030.000000
1030.000000
1030.000000
1030.000000
1030.000000
1030.000000
1030.000000
1030.000000
1030.000000
1030.000000
1030.000000
1030.000000
1030.000000
1030.000000
1030.000000
1030.000000
1030.000000
1030.000000
1030.000000
1030.000000
1030.000000
1030.000000
1030.000000
1030.000000
1030.000000
1030.000000
1030.000000
1030.000000
1030.000000
1030.000000
1030.000000
1030.000000
1030.000000
1030.000000
1030.000000
1030.000000
1030.000000
1030.000000
1030.000000
1030.000000
1030.000000
1030.000000
1030.000000
1030.000000
1030.000000
1030.000000
1030.000000
1030.000000
1030.000000
1030.000000
1030.000000
1030.000000
1030.000000
1030.000000
1030.000000
1030.000000
1030.000000
1030.000000
1030.000000
1030.000000
1030.000000
1030.000000
1030.000000
1030.000000
1030.000000
1030.000000
1030.000000
1030.000000
1030.000000
1030.000000
1030.000000
1030.000000
1030.000000
1030.000000
1030.000000
1030.000000
1030.000000
1030.000000
1030.000000
1030.000000
1030.000000
1030.000000
1030.000000
1030.000000
1030.000000
1030.000000
1030.000000
1030.000000
1030.000000
1030.000000
1030.000000
1030.000000
1030.000000
1030.000000
1030.000000
1030.000000
1030.000000
1030.000000
1030.000000
1030.000000
1030.000000
1030.000000
1030.000000
1030.000000
1030.000000
1030.000000
1030.000000
1030.000000
1030.000000
1030.000000
1030.000000
1030.000000
1030.000000
1030.000000
1030.000000
1030.000000
1030.000000
1030.000000
1030.000000
1030.000000
1030.000000
1030.000000
1030.000000
1030.000000
1030.000000
1030.000000
1030.000000
1030.000000
1030.000000
1030.000000
1030.000000
1030.000000
1030.000000
1030.000000
1030.000000
1030.000000
1030.000000
1030.000000
1030.000000
1030.000000
1030.000000
1030.000000
1030.000000
1030.000000
1030.000000
1030.000000
1030.000000
1030.000000
1030.000000
1030.000000
1030.000000
1030.000000
1030.000000
1030.000000
1030.000000
1030.000000
1030.000000
1030.000000
1030.000000
1030.000000
1030.000000
1030.000000
1030.000000
1030.000000
1030.000000
1030.000000
1030.000000
1030.000000
1030.000000
1030.000000
1030.000000
1030.000000
1030.000000
1030.000000
1030.000000
1030.000000
1030.000000
1030.000000
1030.000000
1030.000000
1030.000000
1030.000000
1030.000000
1030.000000
1030.000000
1030.000000
1030.000000
1030.000000
1030.000000
1030.000000
1030.000000
1030.000000
1030.000000
1030.000000
1030.000000
1030.000000
1030.000000
1030.000000
1030.000000
1030.000000
1030.000000
1030.000000
1030.000000
1030.000000
1030.000000
1030.000000
1030.000000
1030.000000
1030.000000
1030.000000
1030.000000
1030.000000
1030.000000
1030.000000
1030.000000
1030.000000
1030.000000
1030.000000
1030.000000
1030.000000
1030.000000
1030.000000
1030.000000
1030.000000
1030.000000
1030.000000
1030.000000
1030.000000
1030.000000
1030.000000
1030.000000
1030.000000
1030.000000
1030.000000
1030.000000
1030.000000
1030.000000
1030.000000
1030.000000
1030.000000
1030.000000
1030.000000
1030.000000
1030.000000
1030.000000
1030.000000
1030.000000
1030.000000
1030.000000
1030.000000
1030.000000
1030.000000
1030.000000
1030.000000
1030.000000
1030.000000
1030.000000
1030.000000
1030.000000
1030.000000
1030.000000
1030.000000
1030.000000
1030.000000
1030.000000
1030.000000
1030.000000
1030.000000
1030.000000
1030.000000
1030.000000
1030.000000
1030.000000
1030.000000
1030.000000
1030.000000
1030.000000
1030.000000
1030.000000
1030.000000
1030.000000
1030.000000
1030.000000
1030.000000
1030.000000
1030.000000
1030.000000
1030.000000
1030.000000
1030.000000
1030.000000
1030.000000
1030.000000
1030.000000
1030.000000
1030.000000
1030.000000
1030.000000
1030.000000
1030.000000
1030.000000
1030.000000
1030.000000
1030.000000
1030.000000
1030.000000
1030.000000
1030.000000
1030.000000
1030.000000
1030.000000
1030.000000
1030.000000
1030.000000
1030.000000
1030.000000
1030.000000
1030.000000
1030.000000
1030.000000
1030.000000
1030.000000
1030.000000
1030.000000
1030.000000
1030.000000
1030.000000
1030.000000
1030.000000
1030.000000
1030.000000
1030.000000
1030.000000
1030.000000
1030.000000
1030.000000
1030.000000
1030.000000
1030.000000
1030.000000
1030.000000
1030.000000
1030.000000
1030.000000
1030.000000
1030.000000
1030.000000
1030.000000
1030.000000
1030.000000
1030.000000
1030.000000
1030.000000
1030.000000
1030.000000
1030.000000
1030.000000
1030.000000
1030.000000
1030.000000
1030.000000
1030.000000
1030.000000
1030.000000
1030.000000
1030.000000
1030.000000
1030.000000
1030.000000
1030.000000
1030.000000
1030.000000
1030.000000
1030.000000
1030.000000
1030.000000
1030.000000
1030.000000
1030.000000
1030.000000
1030.000000
1030.000000
1030.000000
1030.000000
1030.000000
1030.000000
1030.000000
1030.000000
1030.000000
1030.000000
1030.000000
1030.000000
1030.000000
1030.000000
1030.000000
1030.000000
1030.000000
1030.000000
1030.000000
1030.000000
1030.000000
1030.000000
1030.000000
1030.000000
1030.000000
1030.000000
1030.000000
1030.000000
1030.000000
1030.000000
1030.000000
1030.000000
1030.000000
1030.000000
1030.000000
1030.000000
1030.000000
1030.000000
1030.000000
1030.000000
1030.000000
1030.000000
1030.000000
1030.000000
1030.000000
1030.000000
1030.000000
1030.000000
1030.000000
1030.000000
1030.000000
1030.000000
1030.000000
1030.000000
1030.000000
1030.000000
1030.000000
1030.000000
1030.000000
1030.000000
1030.000000
1030.000000
1030.000000
1030.000000
1030.000000
1030.000000
1030.000000
1030.000000
1030.000000
1030.000000
1030.000000
1030.000000
1030.000000
1030.000000
1030.000000
1030.000000
1030.000000
1030.000000
1030.000000
1030.000000
1030.000000
1030.000000
1030.000000
1030.000000
1030.000000
1030.000000
1030.000000
1030.000000
1030.000000
1030.000000
1030.000000
1030.000000
1030.000000
1030.000000
1030.000000
1030.000000
1030.000000
1030.000000
1030.000000
1030.000000
1030.000000
1030.000000
1030.000000
1030.000000
1030.000000
1030.000000
1030.000000
1030.000000
1030.000000
1030.000000
1030.000000
1030.000000
1030.000000
1030.000000
1030.000000
1030.000000
1030.000000
1030.000000
1030.000000
1030.000000
1030.000000
1030.000000
1030.000000
1030.000000
1030.000000
1030.000000
1030.000000
1030.000000
1030.000000
1030.000000
1030.000000
1030.000000
1030.000000
1030.000000
1030.000000
1030.000000
1030.000000
1030.000000
1030.000000
1030.000000
1030.000000
1030.000000
1030.000000
1030.000000
1030.000000
1030.000000
1030.000000
1030.000000
1030.000000
1030.000000
1030.000000
1030.000000
1030.000000
1030.000000
1030.000000
1030.000000
1030.000000
1030.000000
1030.000000
1030.000000
1030.000000
1030.000000
1030.000000
1030.000000
1030.000000
1030.000000
1030.000000
1030.000000
1030.000000
1030.000000
1030.000000
1030.000000
1030.000000
1030.000000
1030.000000
1030.000000
1030.000000
1030.000000
1030.000000
1030.000000
1030.000000
1030.000000
1030.000000
1030.000000
1030.000000
1030.000000
1030.000000
1030.000000
1030.000000
1030.000000
1030.000000
1030.000000
1030.000000
1030.000000
1030.000000
1030.000000
1030.000000
1030.000000
1030.000000
1030.000000
1030.000000
1030.000000
1030.000000
1030.000000
1030.000000
1030.000000
1030.000000
1030.000000
1030.000000
1030.000000
1030.000000
1030.000000
1030.000000
1030.000000
1030.000000
1030.000000
1030.000000
1030.000000
1030.000000
1030.000000
1030.000000
1030.000000
1030.000000
1030.000000
1030.000000
1030.000000
1030.000000
1030.000000
1030.000000
1030.000000
1030.000000
1030.000000
1030.000000
1030.000000
1030.000000
1030.000000
1030.000000
1030.000000
1030.000000
1030.000000
1030.000000
1030.000000
1030.000000
1030.000000
1030.000000
1030.000000
1030.000000
1030.000000
1030.000000
1030.000000
1030.000000
1030.000000
1030.000000
1030.000000
1030.000000
1030.000000
1030.000000
1030.000000
1030.000000
1030.000000
1030.000000
1030.000000
1030.000000
1030.000000
1030.000000
1030.000000
1030.000000
1030.000000
1030.000000
1030.000000
1030.000000
1030.000000
1030.000000
1030.000000
1030.000000
1030.000000
1030.000000
1030.000000
1030.000000
1030.000000
1030.000000
1030.000000
1030.000000
1030.000000
1030.000000
1030.000000
1030.000000
1030.000000
1030.000000
1030.000000
1030.000000
1030.000000
1030.000000
1030.000000
1030.000000
1030.000000
1030.000000
1030.000000
1030.000000
1030.000000
1030.000000
1030.000000
1030.000000
1030.000000
1030.000000
1030.000000
1030.000000
1030.000000
1030.000000
1030.000000
1030.000000
1030.000000
1030.000000
1030.000000
1030.000000
1030.000000
1030.000000
1030.000000
1030.000000
1030.000000
1030.000000
1030.000000
1030.000000
1030.000000
1030.000000
1030.000000
1030.000000
1030.000000
1030.000000
1030.000000
1030.000000
1030.000000
1030.000000
1030.000000
1030.000000
1030.000000
1030.000000
1030.000000
1030.000000
1030.000000
1030.000000
1030.000000
1030.000000
1030.000000
1030.000000
1030.000000
1030.000000
1030.000000
1030.000000
1030.000000
1030.000000
1030.000000
1030.000000
1030.000000
1030.000000
1030.000000
1030.000000
1030.000000
1030.000000
1030.000000
1030.000000
1030.000000
1030.000000
1030.000000
1030.000000
1030.000000
1030.000000
1030.000000
1030.000000
1030.000000
1030.000000
1030.000000
1030.000000
1030.000000
1030.000000
1030.000000
1030.000000
1030.000000
1030.000000
1030.000000
1030.000000
1030.000000
1030.000000
1030.000000
1030.000000
1030.000000
1030.000000
1030.000000
1030.000000
1030.000000
1030.000000
1030.000000
1030.000000
1030.000000
1030.000000
1030.000000
1030.000000
1030.000000
1030.000000
1030.000000
1030.000000
1030.000000
1030.000000
1030.000000
1030.000000
1030.000000
1030.000000
1030.000000
1030.000000
1030.000000
1030.000000
1030.000000
1030.000000
1030.000000
1030.000000
1030.000000
1030.000000
1030.000000
1030.000000
1030.000000
1030.000000
1030.000000
1030.000000
1030.000000
1030.000000
1030.000000
1030.000000
1030.000000
1030.000000
1030.000000
1030.000000
1030.000000
1030.000000
1030.000000
1030.000000
1030.000000
1030.000000
1030.000000
1030.000000
1030.000000
1030.000000
1030.000000
1030.000000
1030.000000
1030.000000
1030.000000
1030.000000
1030.000000
1030.000000
1030.000000
1030.000000
1030.000000
1030.000000
1030.000000
1030.000000
1030.000000
1030.000000
1030.000000
1030.000000
1030.000000
1030.000000
1030.000000
1030.000000
1030.000000
1030.000000
1030.000000
1030.000000
1030.000000
1030.000000
1030.000000
1030.000000
1030.000000
1030.000000
1030.000000
1030.000000
1030.000000
1030.000000
1030.000000
1030.000000
1030.000000
1030.000000
1030.000000
1030.000000
1030.000000
1030.000000
1030.000000
1030.000000
1030.000000
1030.000000
1030.000000
1030.000000
1030.000000
1030.000000
1030.000000
1030.000000
1030.000000
1030.000000
1030.000000
1030.000000
1030.000000
1030.000000
1030.000000
1030.000000
1030.000000
1030.000000
1030.000000
1030.000000
1030.000000
1030.000000
1030.000000
1030.000000
1030.000000
1030.000000
1030.000000
1030.000000
1030.000000
1030.000000
1030.000000
1030.000000
1030.000000
1030.000000
1030.000000
1030.000000
1030.000000
1030.000000
1030.000000
1030.000000
1030.000000
1030.000000
1030.000000
1030.000000
1030.000000
1030.000000
1030.000000
1030.000000
1030.000000
1030.000000
1030.000000
1030.000000
1030.000000
1030.000000
1030.000000
1030.000000
1030.000000
1030.000000
1030.000000
1030.000000
1030.000000
1030.000000
1030.000000
1030.000000
1030.000000
1030.000000
1030.000000
1030.000000
1030.000000
1030.000000
1030.000000
1030.000000
1030.000000
1030.000000
1030.000000
1030.000000
1030.000000
1030.000000
1030.000000
1030.000000
1030.000000
1030.000000
1030.000000
1030.000000
1030.000000
1030.000000
1030.000000
1030.000000
1030.000000
1030.000000
1030.000000
1030.000000
1030.000000
1030.000000
1030.000000
1030.000000
1030.000000
1030.000000
1030.000000
1030.000000
1030.000000
1030.000000
1030.000000
1030.000000
1030.000000
1030.000000
1030.000000
1030.000000
1030.000000
1030.000000
1030.000000
1030.000000
1030.000000
1030.000000
1030.000000
1030.000000
1030.000000
1030.000000
1030.000000
1030.000000
1030.000000
1030.000000
1030.000000
1030.000000
1030.000000
1030.000000
1030.000000
1030.000000
1030.000000
1030.000000
1030.000000
1030.000000
1030.000000
1030.000000
1030.000000
1030.000000
1030.000000
1030.000000
1030.000000
1030.000000
1030.000000
1030.000000
1030.000000
1030.000000
1030.000000
1030.000000
1030.000000
1030.000000
1030.000000
1030.000000
1030.000000
1030.000000
1030.000000
1030.000000
1030.000000
1030.000000
1030.000000
1030.000000
1030.000000
1030.000000
1030.000000
1030.000000
1030.000000
1030.000000
1030.000000
1030.000000
1030.000000
1030.000000
1030.000000
1030.000000
1030.000000
1030.000000
1030.000000
1030.000000
1030.000000
1030.000000
1030.000000
1030.000000
1030.000000
1030.000000
1030.000000
1030.000000
1030.000000
1030.000000
1030.000000
1030.000000
1030.000000
1030.000000
1030.000000
1030.000000
1030.000000
1030.000000
1030.000000
1030.000000
1030.000000
1030.000000
1030.000000
1030.000000
1030.000000
1030.000000
1030.000000
1030.000000
1030.000000
1030.000000
1030.000000
1030.000000
1030.000000
1030.000000
1030.000000
1030.000000
1030.000000
1030.000000
1030.000000
1030.000000
1030.000000
1030.000000
1030.000000
1030.000000
1030.000000
1030.000000
1030.000000
1030.000000
1030.000000
1030.000000
1030.000000
1030.000000
1030.000000
1030.000000
1030.000000
1030.000000
1030.000000
1030.000000
1030.000000
1030.000000
1030.000000
1030.000000
1030.000000
1030.000000
1030.000000
1030.000000
1030.000000
1030.000000
1030.000000
1030.000000
1030.000000
1030.000000
1030.000000
1030.000000
1030.000000
1030.000000
1030.000000
1030.000000
1030.000000
1030.000000
1030.000000
1030.000000
1030.000000
1030.000000
1030.000000
1030.000000
1030.000000
1030.000000
1030.000000
1030.000000
1030.000000
1030.000000
1030.000000
1030.000000
1030.000000
1030.000000
1030.000000
1030.000000
1030.000000
1030.000000
1030.000000
1030.000000
1030.000000
1030.000000
1030.000000
1030.000000
1030.000000
1030.000000
1030.000000
1030.000000
1030.000000
1030.000000
1030.000000
1030.000000
1030.000000
1030.000000
1030.000000
1030.000000
1030.000000
1030.000000
1030.000000
1030.000000
1030.000000
1030.000000
1030.000000
1030.000000
1030.000000
1030.000000
1030.000000
1030.000000
1030.000000
1030.000000
1030.000000
1030.000000
1030.000000
1030.000000
1030.000000
1030.000000
1030.000000
1030.000000
1030.000000
1030.000000
1030.000000
1030.000000
1030.000000
1030.000000
1030.000000
1030.000000
1030.000000
1030.000000
1030.000000
1030.000000
1030.000000
1030.000000
1030.000000
1030.000000
1030.000000
1030.000000
1030.000000
1030.000000
1030.000000
1030.000000
1030.000000
1030.000000
1030.000000
1030.000000
1030.000000
1030.000000
1030.000000
1030.000000
1030.000000
1030.000000
1030.000000
1030.000000
1030.000000
1030.000000
1030.000000
1030.000000
1030.000000
1030.000000
1030.000000
1030.000000
1030.000000
1030.000000
1030.000000
1030.000000
1030.000000
1030.000000
1030.000000
1030.000000
1030.000000
1030.000000
1030.000000
1030.000000
1030.000000
1030.000000
1030.000000
1030.000000
1030.000000
1030.000000
1030.000000
1030.000000
1030.000000
1030.000000
1030.000000
1030.000000
1030.000000
1030.000000
1030.000000
1030.000000
1030.000000
1030.000000
1030.000000
1030.000000
1030.000000
1030.000000
1030.000000
1030.000000
1030.000000
1030.000000
1030.000000
1030.000000
1030.000000
1030.000000
1030.000000
1030.000000
1030.000000
1030.000000
1030.000000
1030.000000
1030.000000
1030.000000
1030.000000
1030.000000
1030.000000
1030.000000
1030.000000
1030.000000
1030.000000
1030.000000
1030.000000
1030.000000
1030.000000
1030.000000
1030.000000
1030.000000
1030.000000
1030.000000
1030.000000
1030.000000
1030.000000
1030.000000
1030.000000
1030.000000
1030.000000
1030.000000
1030.000000
1030.000000
1030.000000
1030.000000
1030.000000
1030.000000
1030.000000
1030.000000
1030.000000
1030.000000
1030.000000
1030.000000
1030.000000
1030.000000
1030.000000
1030.000000
1030.000000
1030.000000
1030.000000
1030.000000
1030.000000
1030.000000
1030.000000
1030.000000
1030.000000
1030.000000
1030.000000
1030.000000
1030.000000
1030.000000
1030.000000
1030.000000
1030.000000
1030.000000
1030.000000
1030.000000
1030.000000
1030.000000
1030.000000
1030.000000
1030.000000
1030.000000
1030.000000
1030.000000
1030.000000
1030.000000
1030.000000
1030.000000
1030.000000
1030.000000
1030.000000
1030.000000
1030.000000
1030.000000
1030.000000
1030.000000
1030.000000
1030.000000
1030.000000
1030.000000
1030.000000
1030.000000
1030.000000
1030.000000
1030.000000
1030.000000
1030.000000
1030.000000
1030.000000
1030.000000
1030.000000
1030.000000
1030.000000
1030.000000
1030.000000
1030.000000
1030.000000
1030.000000
1030.000000
1030.000000
1030.000000
1030.000000
1030.000000
1030.000000
1030.000000
1030.000000
1030.000000
1030.000000
1030.000000
1030.000000
1030.000000
1030.000000
1030.000000
1030.000000
1030.000000
1030.000000
1030.000000
1030.000000
1030.000000
1030.000000
1030.000000
1030.000000
1030.000000
1030.000000
1030.000000
1030.000000
1030.000000
1030.000000
1030.000000
1030.000000
1030.000000
1030.000000
1030.000000
1030.000000
1030.000000
1030.000000
1030.000000
1030.000000
1030.000000
1030.000000
1030.000000
1030.000000
1030.000000
1030.000000
1030.000000
1030.000000
1030.000000
1030.000000
1030.000000
1030.000000
1030.000000
1030.000000
1030.000000
1030.000000
1030.000000
1030.000000
1030.000000
1030.000000
1030.000000
1030.000000
1030.000000
1030.000000
1030.000000
1030.000000
1030.000000
1030.000000
1030.000000
1030.000000
1030.000000
1030.000000
1030.000000
1030.000000
1030.000000
1030.000000
1030.000000
1030.000000
1030.000000
1030.000000
1030.000000
1030.000000
1030.000000
1030.000000
1030.000000
1030.000000
1030.000000
1030.000000
1030.000000
1030.000000
1030.000000
1030.000000
1030.000000
1030.000000
1030.000000
1030.000000
1030.000000
1030.000000
1030.000000
1030.000000
1030.000000
1030.000000
1030.000000
1030.000000
1030.000000
1030.000000
1030.000000
1030.000000
1030.000000
1030.000000
1030.000000
1030.000000
1030.000000
1030.000000
1030.000000
1030.000000
1030.000000
1030.000000
1030.000000
1030.000000
1030.000000
1030.000000
1030.000000
1030.000000
1030.000000
1030.000000
1030.000000
1030.000000
1030.000000
1030.000000
1030.000000
1030.000000
1030.000000
1030.000000
1030.000000
1030.000000
1030.000000
1030.000000
1030.000000
1030.000000
1030.000000
1030.000000
1030.000000
1030.000000
1030.000000
1030.000000
1030.000000
1030.000000
1030.000000
1030.000000
1030.000000
1030.000000
1030.000000
1030.000000
1030.000000
1030.000000
1030.000000
1030.000000
1030.000000
1030.000000
1030.000000
1030.000000
1030.000000
1030.000000
1030.000000
1030.000000
1030.000000
1030.000000
1030.000000
1030.000000
1030.000000
1030.000000
1030.000000
1030.000000
1030.000000
1030.000000
1030.000000
1030.000000
1030.000000
1030.000000
1030.000000
1030.000000
1030.000000
1030.000000
1030.000000
1030.000000
1030.000000
1030.000000
1030.000000
1030.000000
1030.000000
1030.000000
1030.000000
1030.000000
1030.000000
1030.000000
1030.000000
1030.000000
1030.000000
1030.000000
1030.000000
1030.000000
1030.000000
1030.000000
1030.000000
1030.000000
1030.000000
1030.000000
1030.000000
1030.000000
1030.000000
1030.000000
1030.000000
1030.000000
1030.000000
1030.000000
1030.000000
1030.000000
1030.000000
1030.000000
1030.000000
1030.000000
1030.000000
1030.000000
1030.000000
1030.000000
1030.000000
1030.000000
1030.000000
1030.000000
1030.000000
1030.000000
1030.000000
1030.000000
1030.000000
1030.000000
1030.000000
1030.000000
1030.000000
1030.000000
1030.000000
1030.000000
1030.000000
1030.000000
1030.000000
1030.000000
1030.000000
1030.000000
1030.000000
1030.000000
1030.000000
1030.000000
1030.000000
1030.000000
1030.000000
1030.000000
1030.000000
1030.000000
1030.000000
1030.000000
1030.000000
1030.000000
1030.000000
1030.000000
1030.000000
1030.000000
1030.000000
1030.000000
1030.000000
1030.000000
1030.000000
1030.000000
1030.000000
1030.000000
1030.000000
1030.000000
1030.000000
1030.000000
1030.000000
1030.000000
1030.000000
1030.000000
1030.000000
1030.000000
1030.000000
1030.000000
1030.000000
1030.000000
1030.000000
1030.000000
1030.000000
1030.000000
1030.000000
1030.000000
1030.000000
1030.000000
1030.000000
1030.000000
1030.000000
1030.000000
1030.000000
1030.000000
1030.000000
1030.000000
1030.000000
1030.000000
1030.000000
1030.000000
1030.000000
1030.000000
1030.000000
1030.000000
1030.000000
1030.000000
1030.000000
1030.000000
1030.000000
1030.000000
1030.000000
1030.000000
1030.000000
1030.000000
1030.000000
1030.000000
1030.000000
1030.000000
1030.000000
1030.000000
1030.000000
1030.000000
1030.000000
1030.000000
1030.000000
1030.000000
1030.000000
1030.000000
1030.000000
1030.000000
1030.000000
1030.000000
1030.000000
1030.000000
1030.000000
1030.000000
1030.000000
1030.000000
1030.000000
1030.000000
1030.000000
1030.000000
1030.000000
1030.000000
1030.000000
1030.000000
1030.000000
1030.000000
1030.000000
1030.000000
1030.000000
1030.000000
1030.000000
1030.000000
1030.000000
1030.000000
1030.000000
1030.000000
1030.000000
1030.000000
1030.000000
1030.000000
1030.000000
1030.000000
1030.000000
1030.000000
1030.000000
1030.000000
1030.000000
1030.000000
1030.000000
1030.000000
1030.000000
1030.000000
1030.000000
1030.000000
1030.000000
1030.000000
1030.000000
1030.000000
1030.000000
1030.000000
1030.000000
1030.000000
1030.000000
1030.000000
1030.000000
1030.000000
1030.000000
1030.000000
1030.000000
1030.000000
1030.000000
1030.000000
1030.000000
1030.000000
1030.000000
1030.000000
1030.000000
1030.000000
1030.000000
1030.000000
1030.000000
1030.000000
1030.000000
1030.000000
1030.000000
1030.000000
1030.000000
1030.000000
1030.000000
1030.000000
1030.000000
1030.000000
1030.000000
1030.000000
1030.000000
1030.000000
1030.000000
1030.000000
1030.000000
1030.000000
1030.000000
1030.000000
1030.000000
1030.000000
1030.000000
1030.000000
1030.000000
1030.000000
1030.000000
1030.000000
1030.000000
1030.000000
1030.000000
1030.000000
1030.000000
1030.000000
1030.000000
1030.000000
1030.000000
1030.000000
1030.000000
1030.000000
1030.000000
1030.000000
1030.000000
1030.000000
1030.000000
1030.000000
1030.000000
1030.000000
1030.000000
1030.000000
1030.000000
1030.000000
1030.000000
1030.000000
1030.000000
1030.000000
1030.000000
1030.000000
1030.000000
1030.000000
1030.000000
1030.000000
1030.000000
1030.000000
1030.000000
1030.000000
1030.000000
1030.000000
1030.000000
1030.000000
1030.000000
1030.000000
1030.000000
1030.000000
1030.000000
1030.000000
1030.000000
1030.000000
1030.000000
1030.000000
1030.000000
1030.000000
1030.000000
1030.000000
1030.000000
1030.000000
1030.000000
1030.000000
1030.000000
1030.000000
1030.000000
1030.000000
1030.000000
1030.000000
1030.000000
1030.000000
1030.000000
1030.000000
1030.000000
1030.000000
1030.000000
1030.000000
1030.000000
1030.000000
1030.000000
1030.000000
1030.000000
1030.000000
1030.000000
1030.000000
1030.000000
1030.000000
1030.000000
1030.000000
1030.000000
1030.000000
1030.000000
1030.000000
1030.000000
1030.000000
1030.000000
1030.000000
1030.000000
1030.000000
1030.000000
1030.000000
1030.000000
1030.000000
1030.000000
1030.000000
1030.000000
1030.000000
1030.000000
1030.000000
1030.000000
1030.000000
1030.000000
1030.000000
1030.000000
1030.000000
1030.000000
1030.000000
1030.000000
1030.000000
1030.000000
1030.000000
1030.000000
1030.000000
1030.000000
1030.000000
1030.000000
1030.000000
1030.000000
1030.000000
1030.000000
1030.000000
1030.000000
1030.000000
1030.000000
1030.000000
1030.000000
1030.000000
1030.000000
1030.000000
1030.000000
1030.000000
1030.000000
1030.000000
1030.000000
1030.000000
1030.000000
1030.000000
1030.000000
1030.000000
1030.000000
1030.000000
1030.000000
1030.000000
1030.000000
1030.000000
1030.000000
1030.000000
1030.000000
1030.000000
1030.000000
1030.000000
1030.000000
1030.000000
1030.000000
1030.000000
1030.000000
1030.000000
1030.000000
1030.000000
1030.000000
1030.000000
1030.000000
1030.000000
1030.000000
1030.000000
1030.000000
1030.000000
1030.000000
1030.000000
1030.000000
1030.000000
1030.000000
1030.000000
1030.000000
1030.000000
1030.000000
1030.000000
1030.000000
1030.000000
1030.000000
1030.000000
1030.000000
1030.000000
1030.000000
1030.000000
1030.000000
1030.000000
1030.000000
1030.000000
1030.000000
1030.000000
1030.000000
1030.000000
1030.000000
1030.000000
1030.000000
1030.000000
1030.000000
1030.000000
1030.000000
1030.000000
1030.000000
1030.000000
1030.000000
1030.000000
1030.000000
1030.000000
1030.000000
1030.000000
1030.000000
1030.000000
1030.000000
1030.000000
1030.000000
1030.000000
1030.000000
1030.000000
1030.000000
1030.000000
1030.000000
1030.000000
1030.000000
1030.000000
1030.000000
1030.000000
1030.000000
1030.000000
1030.000000
1030.000000
1030.000000
1030.000000
1030.000000
1030.000000
1030.000000
1030.000000
1030.000000
1030.000000
1030.000000
1030.000000
1030.000000
1030.000000
1030.000000
1030.000000
1030.000000
1030.000000
1030.000000
1030.000000
1030.000000
1030.000000
1030.000000
1030.000000
1030.000000
1030.000000
1030.000000
1030.000000
1030.000000
1030.000000
1030.000000
1030.000000
1030.000000
1030.000000
1030.000000
1030.000000
1030.000000
1030.000000
1030.000000
1030.000000
1030.000000
1030.000000
1030.000000
1030.000000
1030.000000
1030.000000
1030.000000
1030.000000
1030.000000
1030.000000
1030.000000
1030.000000
1030.000000
1030.000000
1030.000000
1030.000000
1030.000000
1030.000000
1030.000000
1030.000000
1030.000000
1030.000000
1030.000000
1030.000000
1030.000000
1030.000000
1030.000000
1030.000000
1030.000000
1030.000000
1030.000000
1030.000000
1030.000000
1030.000000
1030.000000
1030.000000
1030.000000
1030.000000
1030.000000
1030.000000
1030.000000
1030.000000
1030.000000
1030.000000
1030.000000
1030.000000
1030.000000
1030.000000
1030.000000
1030.000000
1030.000000
1030.000000
1030.000000
1030.000000
1030.000000
1030.000000
1030.000000
1030.000000
1030.000000
1030.000000
1030.000000
1030.000000
1030.000000
1030.000000
1030.000000
1030.000000
1030.000000
1030.000000
1030.000000
1030.000000
1030.000000
1030.000000
1030.000000
1030.000000
1030.000000
1030.000000
1030.000000
1030.000000
1030.000000
1030.000000
1030.000000
1030.000000
1030.000000
1030.000000
1030.000000
1030.000000
1030.000000
1030.000000
1030.000000
1030.000000
1030.000000
1030.000000
1030.000000
1030.000000
1030.000000
1030.000000
1030.000000
1030.000000
1030.000000
1030.000000
1030.000000
1030.000000
1030.000000
1030.000000
1030.000000
1030.000000
1030.000000
1030.000000
1030.000000
1030.000000
1030.000000
1030.000000
1030.000000
1030.000000
1030.000000
1030.000000
1030.000000
1030.000000
1030.000000
1030.000000
1030.000000
1030.000000
1030.000000
1030.000000
1030.000000
1030.000000
1030.000000
1030.000000
1030.000000
1030.000000
1030.000000
1030.000000
1030.000000
1030.000000
1030.000000
1030.000000
1030.000000
1030.000000
1030.000000
1030.000000
1030.000000
1030.000000
1030.000000
1030.000000
1030.000000
1030.000000
1030.000000
1030.000000
1030.000000
1030.000000
1030.000000
1030.000000
1030.000000
1030.000000
1030.000000
1030.000000
1030.000000
1030.000000
1030.000000
1030.000000
1030.000000
1030.000000
1030.000000
1030.000000
1030.000000
1030.000000
1030.000000
1030.000000
1030.000000
1030.000000
1030.000000
1030.000000
1030.000000
1030.000000
1030.000000
1030.000000
1030.000000
1030.000000
1030.000000
1030.000000
1030.000000
1030.000000
1030.000000
1030.000000
1030.000000
1030.000000
1030.000000
1030.000000
1030.000000
1030.000000
1030.000000
1030.000000
1030.000000
1030.000000
1030.000000
1030.000000
1030.000000
1030.000000
1030.000000
1030.000000
1030.000000
1030.000000
1030.000000
1030.000000
1030.000000
1030.000000
1030.000000
1030.000000
1030.000000
1030.000000
1030.000000
1030.000000
1030.000000
1030.000000
1030.000000
1030.000000
1030.000000
1030.000000
1030.000000
1030.000000
1030.000000
1030.000000
1030.000000
1030.000000
1030.000000
1030.000000
1030.000000
1030.000000
1030.000000
1030.000000
1030.000000
1030.000000
1030.000000
1030.000000
1030.000000
1030.000000
1030.000000
1030.000000
1030.000000
1030.000000
1030.000000
1030.000000
1030.000000
1030.000000
1030.000000
1030.000000
1030.000000
1030.000000
1030.000000
1030.000000
1030.000000
1030.000000
1030.000000
1030.000000
1030.000000
1030.000000
1030.000000
1030.000000
1030.000000
1030.000000
1030.000000
1030.000000
1030.000000
1030.000000
1030.000000
1030.000000
1030.000000
1030.000000
1030.000000
1030.000000
1030.000000
1030.000000
1030.000000
1030.000000
1030.000000
1030.000000
1030.000000
1030.000000
1030.000000
1030.000000
1030.000000
1030.000000
1030.000000
1030.000000
1030.000000
1030.000000
1030.000000
1030.000000
1030.000000
1030.000000
1030.000000
1030.000000
1030.000000
1030.000000
1030.000000
1030.000000
1030.000000
1030.000000
1030.000000
1030.000000
1030.000000
1030.000000
1030.000000
1030.000000
1030.000000
1030.000000
1030.000000
1030.000000
1030.000000
1030.000000
1030.000000
1030.000000
1030.000000
1030.000000
1030.000000
1030.000000
1030.000000
1030.000000
1030.000000
1030.000000
1030.000000
1030.000000
1030.000000
1030.000000
1030.000000
1030.000000
1030.000000
1030.000000
1030.000000
1030.000000
1030.000000
1030.000000
1030.000000
1030.000000
1030.000000
1030.000000
1030.000000
1030.000000
1030.000000
1030.000000
1030.000000
1030.000000
1030.000000
1030.000000
1030.000000
1030.000000
1030.000000
1030.000000
1030.000000
1030.000000
1030.000000
1030.000000
1030.000000
1030.000000
1030.000000
1030.000000
1030.000000
1030.000000
1030.000000
1030.000000
1030.000000
1030.000000
1030.000000
1030.000000
1030.000000
1030.000000
1030.000000
1030.000000
1030.000000
1030.000000
1030.000000
1030.000000
1030.000000
1030.000000
1030.000000
1030.000000
1030.000000
1030.000000
1030.000000
1030.000000
1030.000000
1030.000000
1030.000000
1030.000000
1030.000000
1030.000000
1030.000000
1030.000000
1030.000000
1030.000000
1030.000000
1030.000000
1030.000000
1030.000000
1030.000000
1030.000000
1030.000000
1030.000000
1030.000000
1030.000000
1030.000000
1030.000000
1030.000000
1030.000000
1030.000000
1030.000000
1030.000000
1030.000000
1030.000000
1030.000000
1030.000000
1030.000000
1030.000000
1030.000000
1030.000000
1030.000000
1030.000000
1030.000000
1030.000000
1030.000000
1030.000000
1030.000000
1030.000000
1030.000000
1030.000000
1030.000000
1030.000000
1030.000000
1030.000000
1030.000000
1030.000000
1030.000000
1030.000000
1030.000000
1030.000000
1030.000000
1030.000000
1030.000000
1030.000000
1030.000000
1030.000000
1030.000000
1030.000000
1030.000000
1030.000000
1030.000000
1030.000000
1030.000000
1030.000000
1030.000000
1030.000000
1030.000000
1030.000000
1030.000000
1030.000000
1030.000000
1030.000000
1030.000000
1030.000000
1030.000000
1030.000000
1030.000000
1030.000000
1030.000000
1030.000000
1030.000000
1030.000000
1030.000000
1030.000000
1030.000000
1030.000000
1030.000000
1030.000000
1030.000000
1030.000000
1030.000000
1030.000000
1030.000000
1030.000000
1030.000000
1030.000000
1030.000000
1030.000000
1030.000000
1030.000000
1030.000000
1030.000000
1030.000000
1030.000000
1030.000000
1030.000000
1030.000000
1030.000000
1030.000000
1030.000000
1030.000000
1030.000000
1030.000000
1030.000000
1030.000000
1030.000000
1030.000000
1030.000000
1030.000000
1030.000000
1030.000000
1030.000000
1030.000000
1030.000000
1030.000000
1030.000000
1030.000000
1030.000000
1030.000000
1030.000000
1030.000000
1030.000000
1030.000000
1030.000000
1030.000000
1030.000000
1030.000000
1030.000000
1030.000000
1030.000000
1030.000000
1030.000000
1030.000000
1030.000000
1030.000000
1030.000000
1030.000000
1030.000000
1030.000000
1030.000000
1030.000000
1030.000000
1030.000000
1030.000000
1030.000000
1030.000000
1030.000000
1030.000000
1030.000000
1030.000000
1030.000000
1030.000000
1030.000000
1030.000000
1030.000000
1030.000000
1030.000000
1030.000000
1030.000000
1030.000000
1030.000000
1030.000000
1030.000000
1030.000000
1030.000000
1030.000000
1030.000000
1030.000000
1030.000000
1030.000000
1030.000000
1030.000000
1030.000000
1030.000000
1030.000000
1030.000000
1030.000000
1030.000000
1030.000000
1030.000000
1030.000000
1030.000000
1030.000000
1030.000000
1030.000000
1030.000000
1030.000000
1030.000000
1030.000000
1030.000000
1030.000000
1030.000000
1030.000000
1030.000000
1030.000000
1030.000000
1030.000000
1030.000000
1030.000000
1030.000000
1030.000000
1030.000000
1030.000000
1030.000000
1030.000000
1030.000000
1030.000000
1030.000000
1030.000000
1030.000000
1030.000000
1030.000000
1030.000000
1030.000000
1030.000000
1030.000000
1030.000000
1030.000000
1030.000000
1030.000000
1030.000000
1030.000000
1030.000000
1030.000000
1030.000000
1030.000000
1030.000000
1030.000000
1030.000000
1030.000000
1030.000000
1030.000000
1030.000000
1030.000000
1030.000000
1030.000000
1030.000000
1030.000000
1030.000000
1030.000000
1030.000000
1030.000000
1030.000000
1030.000000
1030.000000
1030.000000
1030.000000
1030.000000
1030.000000
1030.000000
1030.000000
1030.000000
1030.000000
1030.000000
1030.000000
1030.000000
1030.000000
1030.000000
1030.000000
1030.000000
1030.000000
1030.000000
1030.000000
1030.000000
1030.000000
1030.000000
1030.000000
1030.000000
1030.000000
1030.000000
1030.000000
1030.000000
1030.000000
1030.000000
1030.000000
1030.000000
1030.000000
1030.000000
1030.000000
1030.000000
1030.000000
1030.000000
1030.000000
1030.000000
1030.000000
1030.000000
1030.000000
1030.000000
1030.000000
1030.000000
1030.000000
1030.000000
1030.000000
1030.000000
1030.000000
1030.000000
1030.000000
1030.000000
1030.000000
1030.000000
1030.000000
1030.000000
1030.000000
1030.000000
1030.000000
1030.000000
1030.000000
1030.000000
1030.000000
1030.000000
1030.000000
1030.000000
1030.000000
1030.000000
1030.000000
1030.000000
1030.000000
1030.000000
1030.000000
1030.000000
1030.000000
1030.000000
1030.000000
1030.000000
1030.000000
1030.000000
1030.000000
1030.000000
1030.000000
1030.000000
1030.000000
1030.000000
1030.000000
1030.000000
1030.000000
1030.000000
1030.000000
1030.000000
1030.000000
1030.000000
1030.000000
1030.000000
1030.000000
1030.000000
1030.000000
1030.000000
1030.000000
1030.000000
1030.000000
1030.000000
1030.000000
1030.000000
1030.000000
1030.000000
1030.000000
1030.000000
1030.000000
1030.000000
1030.000000
1030.000000
1030.000000
1030.000000
1030.000000
1030.000000
1030.000000
1030.000000
1030.000000
1030.000000
1030.000000
1030.000000
1030.000000
1030.000000
1030.000000
1030.000000
1030.000000
1030.000000
1030.000000
1030.000000
1030.000000
1030.000000
1030.000000
1030.000000
1030.000000
1030.000000
1030.000000
1030.000000
1030.000000
1030.000000
1030.000000
1030.000000
1030.000000
1030.000000
1030.000000
1030.000000
1030.000000
1030.000000
1030.000000
1030.000000
1030.000000
1030.000000
1030.000000
1030.000000
1030.000000
1030.000000
1030.000000
1030.000000
1030.000000
1030.000000
1030.000000
1030.000000
1030.000000
1030.000000
1030.000000
1030.000000
1030.000000
1030.000000
1030.000000
1030.000000
1030.000000
1030.000000
1030.000000
1030.000000
1030.000000
1030.000000
1030.000000
1030.000000
1030.000000
1030.000000
1030.000000
1030.000000
1030.000000
1030.000000
1030.000000
1030.000000
1030.000000
1030.000000
1030.000000
1030.000000
1030.000000
1030.000000
1030.000000
1030.000000
1030.000000
1030.000000
1030.000000
1030.000000
1030.000000
1030.000000
1030.000000
1030.000000
1030.000000
1030.000000
1030.000000
1030.000000
1030.000000
1030.000000
1030.000000
1030.000000
1030.000000
1030.000000
1030.000000
1030.000000
1030.000000
1030.000000
1030.000000
1030.000000
1030.000000
1030.000000
1030.000000
1030.000000
1030.000000
1030.000000
1030.000000
1030.000000
1030.000000
1030.000000
1030.000000
1030.000000
1030.000000
1030.000000
1030.000000
1030.000000
1030.000000
1030.000000
1030.000000
1030.000000
1030.000000
1030.000000
1030.000000
1030.000000
1030.000000
1030.000000
1030.000000
1030.000000
1030.000000
1030.000000
1030.000000
1030.000000
1030.000000
1030.000000
1030.000000
1030.000000
1030.000000
1030.000000
1030.000000
1030.000000
1030.000000
1030.000000
1030.000000
1030.000000
1030.000000
1030.000000
1030.000000
1030.000000
1030.000000
1030.000000
1030.000000
1030.000000
1030.000000
1030.000000
1030.000000
1030.000000
1030.000000
1030.000000
1030.000000
1030.000000
1030.000000
1030.000000
1030.000000
1030.000000
1030.000000
1030.000000
1030.000000
1030.000000
1030.000000
1030.000000
1030.000000
1030.000000
1030.000000
1030.000000
1030.000000
1030.000000
1030.000000
1030.000000
1030.000000
1030.000000
1030.000000
1030.000000
1030.000000
1030.000000
1030.000000
1030.000000
1030.000000
1030.000000
1030.000000
1030.000000
1030.000000
1030.000000
1030.000000
1030.000000
1030.000000
1030.000000
1030.000000
1030.000000
1030.000000
1030.000000
1030.000000
1030.000000
1030.000000
1030.000000
1030.000000
1030.000000
1030.000000
1030.000000
1030.000000
1030.000000
1030.000000
1030.000000
1030.000000
1030.000000
1030.000000
1030.000000
1030.000000
1030.000000
1030.000000
1030.000000
1030.000000
1030.000000
1030.000000
1030.000000
1030.000000
1030.000000
1030.000000
1030.000000
1030.000000
1030.000000
1030.000000
1030.000000
1030.000000
1030.000000
1030.000000
1030.000000
1030.000000
1030.000000
1030.000000
1030.000000
1030.000000
1030.000000
1030.000000
1030.000000
1030.000000
1030.000000
1030.000000
1030.000000
1030.000000
1030.000000
1030.000000
1030.000000
1030.000000
1030.000000
1030.000000
1030.000000
1030.000000
1030.000000
1030.000000
1030.000000
1030.000000
1030.000000
1030.000000
1030.000000
1030.000000
1030.000000
1030.000000
1030.000000
1030.000000
1030.000000
1030.000000
1030.000000
1030.000000
1030.000000
1030.000000
1030.000000
1030.000000
1030.000000
1030.000000
1030.000000
1030.000000
1030.000000
1030.000000
1030.000000
1030.000000
1030.000000
1030.000000
1030.000000
1030.000000
1030.000000
1030.000000
1030.000000
1030.000000
1030.000000
1030.000000
1030.000000
1030.000000
1030.000000
1030.000000
1030.000000
1030.000000
1030.000000
1030.000000
1030.000000
1030.000000
1030.000000
1030.000000
1030.000000
1030.000000
1030.000000
1030.000000
1030.000000
1030.000000
1030.000000
1030.000000
1030.000000
1030.000000
1030.000000
1030.000000
1030.000000
1030.000000
1030.000000
1030.000000
1030.000000
1030.000000
1030.000000
1030.000000
1030.000000
1030.000000
1030.000000
1030.000000
1030.000000
1030.000000
1030.000000
1030.000000
1030.000000
1030.000000
1030.000000
1030.000000
1030.000000
1030.000000
1030.000000
1030.000000
1030.000000
1030.000000
1030.000000
1030.000000
1030.000000
1030.000000
1030.000000
1030.000000
1030.000000
1030.000000
1030.000000
1030.000000
1030.000000
1030.000000
1030.000000
1030.000000
1030.000000
1030.000000
1030.000000
1030.000000
1030.000000
1030.000000
1030.000000
1030.000000
1030.000000
1030.000000
1030.000000
1030.000000
1030.000000
1030.000000
1030.000000
1030.000000
1030.000000
1030.000000
1030.000000
1030.000000
1030.000000
1030.000000
1030.000000
1030.000000
1030.000000
1030.000000
1030.000000
1030.000000
1030.000000
1030.000000
1030.000000
1030.000000
1030.000000
1030.000000
1030.000000
1030.000000
1030.000000
1030.000000
1030.000000
1030.000000
1030.000000
1030.000000
1030.000000
1030.000000
1030.000000
1030.000000
1030.000000
1030.000000
1030.000000
1030.000000
1030.000000
1030.000000
1030.000000
1030.000000
1030.000000
1030.000000
1030.000000
1030.000000
1030.000000
1030.000000
1030.000000
1030.000000
1030.000000
1030.000000
1030.000000
1030.000000
1030.000000
1030.000000
1030.000000
1030.000000
1030.000000
1030.000000
1030.000000
1030.000000
1030.000000
1030.000000
1030.000000
1030.000000
1030.000000
1030.000000
1030.000000
1030.000000
1030.000000
1030.000000
1030.000000
1030.000000
1030.000000
1030.000000
1030.000000
1030.000000
1030.000000
1030.000000
1030.000000
1030.000000
1030.000000
1030.000000
1030.000000
1030.000000
1030.000000
1030.000000
1030.000000
1030.000000
1030.000000
1030.000000
1030.000000
1030.000000
1030.000000
1030.000000
1030.000000
1030.000000
1030.000000
1030.000000
1030.000000
1030.000000
1030.000000
1030.000000
1030.000000
1030.000000
1030.000000
1030.000000
1030.000000
1030.000000
1030.000000
1030.000000
1030.000000
1030.000000
1030.000000
1030.000000
1030.000000
1030.000000
1030.000000
1030.000000
1030.000000
1030.000000
1030.000000
1030.000000
1030.000000
1030.000000
1030.000000
1030.000000
1030.000000
1030.000000
1030.000000
1030.000000
1030.000000
1030.000000
1030.000000
1030.000000
1030.000000
1030.000000
1030.000000
1030.000000
1030.000000
1030.000000
1030.000000
1030.000000
1030.000000
1030.000000
1030.000000
1030.000000
1030.000000
1030.000000
1030.000000
1030.000000
1030.000000
1030.000000
1030.000000
1030.000000
1030.000000
1030.000000
1030.000000
1030.000000
1030.000000
1030.000000
1030.000000
1030.000000
1030.000000
1030.000000
1030.000000
1030.000000
1030.000000
1030.000000
1030.000000
1030.000000
1030.000000
1030.000000
1030.000000
1030.000000
1030.000000
1030.000000
1030.000000
1030.000000
1030.000000
1030.000000
1030.000000
1030.000000
1030.000000
1030.000000
1030.000000
1030.000000
1030.000000
1030.000000
1030.000000
1030.000000
1030.000000
1030.000000
1030.000000
1030.000000
1030.000000
1030.000000
1030.000000
1030.000000
1030.000000
1030.000000
1030.000000
1030.000000
1030.000000
1030.000000
1030.000000
1030.000000
1030.000000
1030.000000
1030.000000
1030.000000
1030.000000
1030.000000
1030.000000
1030.000000
1030.000000
1030.000000
1030.000000
1030.000000
1030.000000
1030.000000
1030.000000
1030.000000
1030.000000
1030.000000
1030.000000
1030.000000
1030.000000
1030.000000
1030.000000
1030.000000
1030.000000
1030.000000
1030.000000
1030.000000
1030.000000
1030.000000
1030.000000
1030.000000
1030.000000
1030.000000
1030.000000
1030.000000
1030.000000
1030.000000
1030.000000
1030.000000
1030.000000
1030.000000
1030.000000
1030.000000
1030.000000
1030.000000
1030.000000
1030.000000
1030.000000
1030.000000
1030.000000
1030.000000
1030.000000
1030.000000
1030.000000
1030.000000
1030.000000
1030.000000
1030.000000
1030.000000
1030.000000
1030.000000
1030.000000
1030.000000
1030.000000
1030.000000
1030.000000
1030.000000
1030.000000
1030.000000
1030.000000
1030.000000
1030.000000
1030.000000
1030.000000
1030.000000
1030.000000
1030.000000
1030.000000
1030.000000
1030.000000
1030.000000
1030.000000
1030.000000
1030.000000
1030.000000
1030.000000
1030.000000
1030.000000
1030.000000
1030.000000
1030.000000
1030.000000
1030.000000
1030.000000
1030.000000
1030.000000
1030.000000
1030.000000
1030.000000
1030.000000
1030.000000
1030.000000
1030.000000
1030.000000
1030.000000
1030.000000
1030.000000
1030.000000
1030.000000
1030.000000
1030.000000
1030.000000
1030.000000
1030.000000
1030.000000
1030.000000
1030.000000
1030.000000
1030.000000
1030.000000
1030.000000
1030.000000
1030.000000
1030.000000
1030.000000
1030.000000
1030.000000
1030.000000
1030.000000
1030.000000
1030.000000
1030.000000
1030.000000
1030.000000
1030.000000
1030.000000
1030.000000
1030.000000
1030.000000
1030.000000
1030.000000
1030.000000
1030.000000
1030.000000
1030.000000
1030.000000
1030.000000
1030.000000
1030.000000
1030.000000
1030.000000
1030.000000
1030.000000
1030.000000
1030.000000
1030.000000
1030.000000
1030.000000
1030.000000
1030.000000
1030.000000
1030.000000
1030.000000
1030.000000
1030.000000
1030.000000
1030.000000
1030.000000
1030.000000
1030.000000
1030.000000
1030.000000
1030.000000
1030.000000
1030.000000
1030.000000
1030.000000
1030.000000
1030.000000
1030.000000
1030.000000
1030.000000
1030.000000
1030.000000
1030.000000
1030.000000
1030.000000
1030.000000
1030.000000
1030.000000
1030.000000
1030.000000
1030.000000
1030.000000
1030.000000
1030.000000
1030.000000
1030.000000
1030.000000
1030.000000
1030.000000
1030.000000
1030.000000
1030.000000
1030.000000
1030.000000
1030.000000
1030.000000
1030.000000
1030.000000
1030.000000
1030.000000
1030.000000
1030.000000
1030.000000
1030.000000
1030.000000
1030.000000
1030.000000
1030.000000
1030.000000
1030.000000
1030.000000
1030.000000
1030.000000
1030.000000
1030.000000
1030.000000
1030.000000
1030.000000
1030.000000
1030.000000
1030.000000
1030.000000
1030.000000
1030.000000
1030.000000
1030.000000
1030.000000
1030.000000
1030.000000
1030.000000
1030.000000
1030.000000
1030.000000
1030.000000
1030.000000
1030.000000
1030.000000
1030.000000
1030.000000
1030.000000
1030.000000
1030.000000
1030.000000
1030.000000
1030.000000
1030.000000
1030.000000
1030.000000
1030.000000
1030.000000
1030.000000
1030.000000
1030.000000
1030.000000
1030.000000
1030.000000
1030.000000
1030.000000
1030.000000
1030.000000
1030.000000
1030.000000
1030.000000
1030.000000
1030.000000
1030.000000
1030.000000
1030.000000
1030.000000
1030.000000
1030.000000
1030.000000
1030.000000
1030.000000
1030.000000
1030.000000
1030.000000
1030.000000
1030.000000
1030.000000
1030.000000
1030.000000
1030.000000
1030.000000
1030.000000
1030.000000
1030.000000
1030.000000
1030.000000
1030.000000
1030.000000
1030.000000
1030.000000
1030.000000
1030.000000
1030.000000
1030.000000
1030.000000
1030.000000
1030.000000
1030.000000
1030.000000
1030.000000
1030.000000
1030.000000
1030.000000
1030.000000
1030.000000
1030.000000
1030.000000
1030.000000
1030.000000
1030.000000
1030.000000
1030.000000
1030.000000
1030.000000
1030.000000
1030.000000
1030.000000
1030.000000
1030.000000
1030.000000
1030.000000
1030.000000
1030.000000
1030.000000
1030.000000
1030.000000
1030.000000
1030.000000
1030.000000
1030.000000
1030.000000
1030.000000
1030.000000
1030.000000
1030.000000
1030.000000
1030.000000
1030.000000
1030.000000
1030.000000
1030.000000
1030.000000
1030.000000
1030.000000
1030.000000
1030.000000
1030.000000
1030.000000
1030.000000
1030.000000
1030.000000
1030.000000
1030.000000
1030.000000
1030.000000
1030.000000
1030.000000
1030.000000
1030.000000
1030.000000
1030.000000
1030.000000
1030.000000
1030.000000
1030.000000
1030.000000
1030.000000
1030.000000
1030.000000
1030.000000
1030.000000
1030.000000
1030.000000
1030.000000
1030.000000
1030.000000
1030.000000
1030.000000
1030.000000
1030.000000
1030.000000
1030.000000
1030.000000
1030.000000
1030.000000
1030.000000
1030.000000
1030.000000
1030.000000
1030.000000
1030.000000
1030.000000
1030.000000
1030.000000
1030.000000
1030.000000
1030.000000
1030.000000
1030.000000
1030.000000
1030.000000
1030.000000
1030.000000
1030.000000
1030.000000
1030.000000
1030.000000
1030.000000
1030.000000
1030.000000
1030.000000
1030.000000
1030.000000
1030.000000
1030.000000
1030.000000
1030.000000
1030.000000
1030.000000
1030.000000
1030.000000
1030.000000
1030.000000
1030.000000
1030.000000
1030.000000
1030.000000
1030.000000
1030.000000
1030.000000
1030.000000
1030.000000
1030.000000
1030.000000
1030.000000
1030.000000
1030.000000
1030.000000
1030.000000
1030.000000
1030.000000
1030.000000
1030.000000
1030.000000
1030.000000
1030.000000
1030.000000
1030.000000
1030.000000
1030.000000
1030.000000
1030.000000
1030.000000
1030.000000
1030.000000
1030.000000
1030.000000
1030.000000
1030.000000
1030.000000
1030.000000
1030.000000
1030.000000
1030.000000
1030.000000
1030.000000
1030.000000
1030.000000
1030.000000
1030.000000
1030.000000
1030.000000
1030.000000
1030.000000
1030.000000
1030.000000
1030.000000
1030.000000
1030.000000
1030.000000
1030.000000
1030.000000
1030.000000
1030.000000
1030.000000
1030.000000
1030.000000
1030.000000
1030.000000
1030.000000
1030.000000
1030.000000
1030.000000
1030.000000
1030.000000
1030.000000
1030.000000
1030.000000
1030.000000
1030.000000
1030.000000
1030.000000
1030.000000
1030.000000
1030.000000
1030.000000
1030.000000
1030.000000
1030.000000
1030.000000
1030.000000
1030.000000
1030.000000
1030.000000
1030.000000
1030.000000
1030.000000
1030.000000
1030.000000
1030.000000
1030.000000
1030.000000
1030.000000
1030.000000
1030.000000
1030.000000
1030.000000
1030.000000
1030.000000
1030.000000
1030.000000
1030.000000
1030.000000
1030.000000
1030.000000
1030.000000
1030.000000
1030.000000
1030.000000
1030.000000
1030.000000
1030.000000
1030.000000
1030.000000
1030.000000
1030.000000
1030.000000
1030.000000
1030.000000
1030.000000
1030.000000
1030.000000
1030.000000
1030.000000
1030.000000
1030.000000
1030.000000
1030.000000
1030.000000
1030.000000
1030.000000
1030.000000
1030.000000
1030.000000
1030.000000
1030.000000
1030.000000
1030.000000
1030.000000
1030.000000
1030.000000
1030.000000
1030.000000
1030.000000
1030.000000
1030.000000
1030.000000
1030.000000
1030.000000
1030.000000
1030.000000
1030.000000
1030.000000
1030.000000
1030.000000
1030.000000
1030.000000
1030.000000
1030.000000
1030.000000
1030.000000
1030.000000
1030.000000
1030.000000
1030.000000
1030.000000
1030.000000
1030.000000
1030.000000
1030.000000
1030.000000
1030.000000
1030.000000
1030.000000
1030.000000
1030.000000
1030.000000
1030.000000
1030.000000
1030.000000
1030.000000
1030.000000
1030.000000
1030.000000
1030.000000
1030.000000
1030.000000
1030.000000
1030.000000
1030.000000
1030.000000
1030.000000
1030.000000
1030.000000
1030.000000
1030.000000
1030.000000
1030.000000
1030.000000
1030.000000
1030.000000
1030.000000
1030.000000
1030.000000
1030.000000
1030.000000
1030.000000
1030.000000
1030.000000
1030.000000
1030.000000
1030.000000
1030.000000
1030.000000
1030.000000
1030.000000
1030.000000
1030.000000
1030.000000
1030.000000
1030.000000
1030.000000
1030.000000
1030.000000
1030.000000
1030.000000
1030.000000
1030.000000
1030.000000
1030.000000
1030.000000
1030.000000
1030.000000
1030.000000
1030.000000
1030.000000
1030.000000
1030.000000
1030.000000
1030.000000
1030.000000
1030.000000
1030.000000
1030.000000
1030.000000
1030.000000
1030.000000
1030.000000
1030.000000
1030.000000
1030.000000
1030.000000
1030.000000
1030.000000
1030.000000
1030.000000
1030.000000
1030.000000
1030.000000
1030.000000
1030.000000
1030.000000
1030.000000
1030.000000
1030.000000
1030.000000
1030.000000
1030.000000
1030.000000
1030.000000
1030.000000
1030.000000
1030.000000
1030.000000
1030.000000
1030.000000
1030.000000
1030.000000
1030.000000
1030.000000
1030.000000
1030.000000
1030.000000
1030.000000
1030.000000
1030.000000
1030.000000
1030.000000
1030.000000
1030.000000
1030.000000
1030.000000
1030.000000
1030.000000
1030.000000
1030.000000
1030.000000
1030.000000
1030.000000
1030.000000
1030.000000
1030.000000
1030.000000
1030.000000
1030.000000
1030.000000
1030.000000
1030.000000
1030.000000
1030.000000
1030.000000
1030.000000
1030.000000
1030.000000
1030.000000
1030.000000
1030.000000
1030.000000
1030.000000
1030.000000
1030.000000
1030.000000
1030.000000
1030.000000
1030.000000
1030.000000
1030.000000
1030.000000
1030.000000
1030.000000
1030.000000
1030.000000
1030.000000
1030.000000
1030.000000
1030.000000
1030.000000
1030.000000
1030.000000
1030.000000
1030.000000
1030.000000
1030.000000
1030.000000
1030.000000
1030.000000
1030.000000
1030.000000
1030.000000
1030.000000
1030.000000
1030.000000
1030.000000
1030.000000
1030.000000
1030.000000
1030.000000
1030.000000
1030.000000
1030.000000
1030.000000
1030.000000
1030.000000
1030.000000
1030.000000
1030.000000
1030.000000
1030.000000
1030.000000
1030.000000
1030.000000
1030.000000
1030.000000
1030.000000
1030.000000
1030.000000
1030.000000
1030.000000
1030.000000
1030.000000
1030.000000
1030.000000
1030.000000
1030.000000
1030.000000
1030.000000
1030.000000
1030.000000
1030.000000
1030.000000
1030.000000
1030.000000
1030.000000
1030.000000
1030.000000
1030.000000
1030.000000
1030.000000
1030.000000
1030.000000
1030.000000
1030.000000
1030.000000
1030.000000
1030.000000
1030.000000
1030.000000
1030.000000
1030.000000
1030.000000
1030.000000
1030.000000
1030.000000
1030.000000
1030.000000
1030.000000
1030.000000
1030.000000
1030.000000
1030.000000
1030.000000
1030.000000
1030.000000
1030.000000
1030.000000
1030.000000
1030.000000
1030.000000
1030.000000
1030.000000
1030.000000
1030.000000
1030.000000
1030.000000
1030.000000
1030.000000
1030.000000
1030.000000
1030.000000
1030.000000
1030.000000
1030.000000
1030.000000
1030.000000
1030.000000
1030.000000
1030.000000
1030.000000
1030.000000
1030.000000
1030.000000
1030.000000
1030.000000
1030.000000
1030.000000
1030.000000
1030.000000
1030.000000
1030.000000
1030.000000
1030.000000
1030.000000
1030.000000
1030.000000
1030.000000
1030.000000
1030.000000
1030.000000
1030.000000
1030.000000
1030.000000
1030.000000
1030.000000
1030.000000
1030.000000
1030.000000
1030.000000
1030.000000
1030.000000
1030.000000
1030.000000
1030.000000
1030.000000
1030.000000
1030.000000
1030.000000
1030.000000
1030.000000
1030.000000
1030.000000
1030.000000
1030.000000
1030.000000
1030.000000
1030.000000
1030.000000
1030.000000
1030.000000
1030.000000
1030.000000
1030.000000
1030.000000
1030.000000
1030.000000
1030.000000
1030.000000
1030.000000
1030.000000
1030.000000
1030.000000
1030.000000
1030.000000
1030.000000
1030.000000
1030.000000
1030.000000
1030.000000
1030.000000
1030.000000
1030.000000
1030.000000
1030.000000
1030.000000
1030.000000
1030.000000
1030.000000
1030.000000
1030.000000
1030.000000
1030.000000
1030.000000
1030.000000
1030.000000
1030.000000
1030.000000
1030.000000
1030.000000
1030.000000
1030.000000
1030.000000
1030.000000
1030.000000
1030.000000
1030.000000
1030.000000
1030.000000
1030.000000
1030.000000
1030.000000
1030.000000
1030.000000
1030.000000
1030.000000
1030.000000
1030.000000
1030.000000
1030.000000
1030.000000
1030.000000
1030.000000
1030.000000
1030.000000
1030.000000
1030.000000
1030.000000
1030.000000
1030.000000
1030.000000
1030.000000
1030.000000
1030.000000
1030.000000
1030.000000
1030.000000
1030.000000
1030.000000
1030.000000
1030.000000
1030.000000
1030.000000
1030.000000
1030.000000
1030.000000
1030.000000
1030.000000
1030.000000
1030.000000
1030.000000
1030.000000
1030.000000
1030.000000
1030.000000
1030.000000
1030.000000
1030.000000
1030.000000
1030.000000
1030.000000
1030.000000
1030.000000
1030.000000
1030.000000
1030.000000
1030.000000
1030.000000
1030.000000
1030.000000
1030.000000
1030.000000
1030.000000
1030.000000
1030.000000
1030.000000
1030.000000
1030.000000
1030.000000
1030.000000
1030.000000
1030.000000
1030.000000
1030.000000
1030.000000
1030.000000
1030.000000
1030.000000
1030.000000
1030.000000
1030.000000
1030.000000
1030.000000
1030.000000
1030.000000
1030.000000
1030.000000
1030.000000
1030.000000
1030.000000
1030.000000
1030.000000
1030.000000
1030.000000
1030.000000
1030.000000
1030.000000
1030.000000
1030.000000
1030.000000
1030.000000
1030.000000
1030.000000
1030.000000
1030.000000
1030.000000
1030.000000
1030.000000
1030.000000
1030.000000
1030.000000
1030.000000
1030.000000
1030.000000
1030.000000
1030.000000
1030.000000
1030.000000
1030.000000
1030.000000
1030.000000
1030.000000
1030.000000
1030.000000
1030.000000
1030.000000
1030.000000
1030.000000
1030.000000
1030.000000
1030.000000
1030.000000
1030.000000
1030.000000
1030.000000
1030.000000
1030.000000
1030.000000
1030.000000
1030.000000
1030.000000
1030.000000
1030.000000
1030.000000
1030.000000
1030.000000
1030.000000
1030.000000
1030.000000
1030.000000
1030.000000
1030.000000
1030.000000
1030.000000
1030.000000
1030.000000
1030.000000
1030.000000
1030.000000
1030.000000
1030.000000
1030.000000
1030.000000
1030.000000
1030.000000
1030.000000
1030.000000
1030.000000
1030.000000
1030.000000
1030.000000
1030.000000
1030.000000
1030.000000
1030.000000
1030.000000
1030.000000
1030.000000
1030.000000
1030.000000
1030.000000
1030.000000
1030.000000
1030.000000
1030.000000
1030.000000
1030.000000
1030.000000
1030.000000
1030.000000
1030.000000
1030.000000
1030.000000
1030.000000
1030.000000
1030.000000
1030.000000
1030.000000
1030.000000
1030.000000
1030.000000
1030.000000
1030.000000
1030.000000
1030.000000
1030.000000
1030.000000
1030.000000
1030.000000
1030.000000
1030.000000
1030.000000
1030.000000
1030.000000
1030.000000
1030.000000
1030.000000
1030.000000
1030.000000
1030.000000
1030.000000
1030.000000
1030.000000
1030.000000
1030.000000
1030.000000
1030.000000
1030.000000
1030.000000
1030.000000
1030.000000
1030.000000
1030.000000
1030.000000
1030.000000
1030.000000
1030.000000
1030.000000
1030.000000
1030.000000
1030.000000
1030.000000
1030.000000
1030.000000
1030.000000
1030.000000
1030.000000
1030.000000
1030.000000
1030.000000
1030.000000
1030.000000
1030.000000
1030.000000
1030.000000
1030.000000
1030.000000
1030.000000
1030.000000
1030.000000
1030.000000
1030.000000
1030.000000
1030.000000
1030.000000
1030.000000
1030.000000
1030.000000
1030.000000
1030.000000
1030.000000
1030.000000
1030.000000
1030.000000
1030.000000
1030.000000
1030.000000
1030.000000
1030.000000
1030.000000
1030.000000
1030.000000
1030.000000
1030.000000
1030.000000
1030.000000
1030.000000
1030.000000
1030.000000
1030.000000
1030.000000
1030.000000
1030.000000
1030.000000
1030.000000
1030.000000
1030.000000
1030.000000
1030.000000
1030.000000
1030.000000
1030.000000
1030.000000
1030.000000
1030.000000
1030.000000
1030.000000
1030.000000
1030.000000
1030.000000
1030.000000
1030.000000
1030.000000
1030.000000
1030.000000
1030.000000
1030.000000
1030.000000
1030.000000
1030.000000
1030.000000
1030.000000
1030.000000
1030.000000
1030.000000
1030.000000
1030.000000
1030.000000
1030.000000
1030.000000
1030.000000
1030.000000
1030.000000
1030.000000
1030.000000
1030.000000
1030.000000
1030.000000
1030.000000
1030.000000
1030.000000
1030.000000
1030.000000
1030.000000
1030.000000
1030.000000
1030.000000
1030.000000
1030.000000
1030.000000
1030.000000
1030.000000
1030.000000
1030.000000
1030.000000
1030.000000
1030.000000
1030.000000
1030.000000
1030.000000
1030.000000
1030.000000
1030.000000
1030.000000
1030.000000
1030.000000
1030.000000
1030.000000
1030.000000
1030.000000
1030.000000
1030.000000
1030.000000
1030.000000
1030.000000
1030.000000
1030.000000
1030.000000
1030.000000
1030.000000
1030.000000
1030.000000
1030.000000
1030.000000
1030.000000
1030.000000
1030.000000
1030.000000
1030.000000
1030.000000
1030.000000
1030.000000
1030.000000
1030.000000
1030.000000
1030.000000
1030.000000
1030.000000
1030.000000
1030.000000
1030.000000
1030.000000
1030.000000
1030.000000
1030.000000
1030.000000
1030.000000
1030.000000
1030.000000
1030.000000
1030.000000
1030.000000
1030.000000
1030.000000
1030.000000
1030.000000
1030.000000
1030.000000
1030.000000
1030.000000
1030.000000
1030.000000
1030.000000
1030.000000
1030.000000
1030.000000
1030.000000
1030.000000
1030.000000
1030.000000
1030.000000
1030.000000
1030.000000
1030.000000
1030.000000
1030.000000
1030.000000
1030.000000
1030.000000
1030.000000
1030.000000
1030.000000
1030.000000
1030.000000
1030.000000
1030.000000
1030.000000
1030.000000
1030.000000
1030.000000
1030.000000
1030.000000
1030.000000
1030.000000
1030.000000
1030.000000
1030.000000
1030.000000
1030.000000
1030.000000
1030.000000
1030.000000
1030.000000
1030.000000
1030.000000
1030.000000
1030.000000
1030.000000
1030.000000
1030.000000
1030.000000
1030.000000
1030.000000
1030.000000
1030.000000
1030.000000
1030.000000
1030.000000
1030.000000
1030.000000
1030.000000
1030.000000
1030.000000
1030.000000
1030.000000
1030.000000
1030.000000
1030.000000
1030.000000
1030.000000
1030.000000
1030.000000
1030.000000
1030.000000
1030.000000
1030.000000
1030.000000
1030.000000
1030.000000
1030.000000
1030.000000
1030.000000
1030.000000
1030.000000
1030.000000
1030.000000
1030.000000
1030.000000
1030.000000
1030.000000
1030.000000
1030.000000
1030.000000
1030.000000
1030.000000
1030.000000
1030.000000
1030.000000
1030.000000
1030.000000
1030.000000
1030.000000
1030.000000
1030.000000
1030.000000
1030.000000
1030.000000
1030.000000
1030.000000
1030.000000
1030.000000
1030.000000
1030.000000
1030.000000
1030.000000
1030.000000
1030.000000
1030.000000
1030.000000
1030.000000
1030.000000
1030.000000
1030.000000
1030.000000
1030.000000
1030.000000
1030.000000
1030.000000
1030.000000
1030.000000
1030.000000
1030.000000
1030.000000
1030.000000
1030.000000
1030.000000
1030.000000
1030.000000
1030.000000
1030.000000
1030.000000
1030.000000
1030.000000
1030.000000
1030.000000
1030.000000
1030.000000
1030.000000
1030.000000
1030.000000
1030.000000
1030.000000
1030.000000
1030.000000
1030.000000
1030.000000
1030.000000
1030.000000
1030.000000
1030.000000
1030.000000
1030.000000
1030.000000
1030.000000
1030.000000
1030.000000
1030.000000
1030.000000
1030.000000
1030.000000
1030.000000
1030.000000
1030.000000
1030.000000
1030.000000
1030.000000
1030.000000
1030.000000
1030.000000
1030.000000
1030.000000
1030.000000
1030.000000
1030.000000
1030.000000
1030.000000
1030.000000
1030.000000
1030.000000
1030.000000
1030.000000
1030.000000
1030.000000
1030.000000
1030.000000
1030.000000
1030.000000
1030.000000
1030.000000
1030.000000
1030.000000
1030.000000
1030.000000
1030.000000
1030.000000
1030.000000
1030.000000
1030.000000
1030.000000
1030.000000
1030.000000
1030.000000
1030.000000
1030.000000
1030.000000
1030.000000
1030.000000
1030.000000
1030.000000
1030.000000
1030.000000
1030.000000
1030.000000
1030.000000
1030.000000
1030.000000
1030.000000
1030.000000
1030.000000
1030.000000
1030.000000
1030.000000
1030.000000
1030.000000
1030.000000
1030.000000
1030.000000
1030.000000
1030.000000
1030.000000
1030.000000
1030.000000
1030.000000
1030.000000
1030.000000
1030.000000
1030.000000
1030.000000
1030.000000
1030.000000
1030.000000
1030.000000
1030.000000
1030.000000
1030.000000
1030.000000
1030.000000
1030.000000
1030.000000
1030.000000
1030.000000
1030.000000
1030.000000
1030.000000
1030.000000
1030.000000
1030.000000
1030.000000
1030.000000
1030.000000
1030.000000
1030.000000
1030.000000
1030.000000
1030.000000
1030.000000
1030.000000
1030.000000
1030.000000
1030.000000
1030.000000
1030.000000
1030.000000
1030.000000
1030.000000
1030.000000
1030.000000
1030.000000
1030.000000
1030.000000
1030.000000
1030.000000
1030.000000
1030.000000
1030.000000
1030.000000
1030.000000
1030.000000
1030.000000
1030.000000
1030.000000
1030.000000
1030.000000
1030.000000
1030.000000
1030.000000
1030.000000
1030.000000
1030.000000
1030.000000
1030.000000
1030.000000
1030.000000
1030.000000
1030.000000
1030.000000
1030.000000
1030.000000
1030.000000
1030.000000
1030.000000
1030.000000
1030.000000
1030.000000
1030.000000
1030.000000
1030.000000
1030.000000
1030.000000
1030.000000
1030.000000
1030.000000
1030.000000
1030.000000
1030.000000
1030.000000
1030.000000
1030.000000
1030.000000
1030.000000
1030.000000
1030.000000
1030.000000
1030.000000
1030.000000
1030.000000
1030.000000
1030.000000
1030.000000
1030.000000
1030.000000
1030.000000
1030.000000
1030.000000
1030.000000
1030.000000
1030.000000
1030.000000
1030.000000
1030.000000
1030.000000
1030.000000
1030.000000
1030.000000
1030.000000
1030.000000
1030.000000
1030.000000
1030.000000
1030.000000
1030.000000
1030.000000
1030.000000
1030.000000
1030.000000
1030.000000
1030.000000
1030.000000
1030.000000
1030.000000
1030.000000
1030.000000
1030.000000
1030.000000
1030.000000
1030.000000
1030.000000
1030.000000
1030.000000
1030.000000
1030.000000
1030.000000
1030.000000
1030.000000
1030.000000
1030.000000
1030.000000
1030.000000
1030.000000
1030.000000
1030.000000
1030.000000
1030.000000
1030.000000
1030.000000
1030.000000
1030.000000
1030.000000
1030.000000
1030.000000
1030.000000
1030.000000
1030.000000
1030.000000
1030.000000
1030.000000
1030.000000
1030.000000
1030.000000
1030.000000
1030.000000
1030.000000
1030.000000
1030.000000
1030.000000
1030.000000
1030.000000
1030.000000
1030.000000
1030.000000
1030.000000
1030.000000
1030.000000
1030.000000
1030.000000
1030.000000
1030.000000
1030.000000
1030.000000
1030.000000
1030.000000
1030.000000
1030.000000
1030.000000
1030.000000
1030.000000
1030.000000
1030.000000
1030.000000
1030.000000
1030.000000
1030.000000
1030.000000
1030.000000
1030.000000
1030.000000
1030.000000
1030.000000
1030.000000
1030.000000
1030.000000
1030.000000
1030.000000
1030.000000
1030.000000
1030.000000
1030.000000
1030.000000
1030.000000
1030.000000
1030.000000
1030.000000
1030.000000
1030.000000
1030.000000
1030.000000
1030.000000
1030.000000
1030.000000
1030.000000
1030.000000
1030.000000
1030.000000
1030.000000
1030.000000
1030.000000
1030.000000
1030.000000
1030.000000
1030.000000
1030.000000
1030.000000
1030.000000
1030.000000
1030.000000
1030.000000
1030.000000
1030.000000
1030.000000
1030.000000
1030.000000
1030.000000
1030.000000
1030.000000
1030.000000
1030.000000
1030.000000
1030.000000
1030.000000
1030.000000
1030.000000
1030.000000
1030.000000
1030.000000
1030.000000
1030.000000
1030.000000
1030.000000
1030.000000
1030.000000
1030.000000
1030.000000
1030.000000
1030.000000
1030.000000
1030.000000
1030.000000
1030.000000
1030.000000
1030.000000
1030.000000
1030.000000
1030.000000
1030.000000
1030.000000
1030.000000
1030.000000
1030.000000
1030.000000
1030.000000
1030.000000
1030.000000
1030.000000
1030.000000
1030.000000
1030.000000
1030.000000
1030.000000
1030.000000
1030.000000
1030.000000
1030.000000
1030.000000
1030.000000
1030.000000
1030.000000
1030.000000
1030.000000
1030.000000
1030.000000
1030.000000
1030.000000
1030.000000
1030.000000
1030.000000
1030.000000
1030.000000
1030.000000
1030.000000
1030.000000
1030.000000
1030.000000
1030.000000
1030.000000
1030.000000
1030.000000
1030.000000
1030.000000
1030.000000
1030.000000
1030.000000
1030.000000
1030.000000
1030.000000
1030.000000
1030.000000
1030.000000
1030.000000
1030.000000
1030.000000
1030.000000
1030.000000
1030.000000
1030.000000
1030.000000
1030.000000
1030.000000
1030.000000
1030.000000
1030.000000
1030.000000
1030.000000
1030.000000
1030.000000
1030.000000
1030.000000
1030.000000
1030.000000
1030.000000
1030.000000
1030.000000
1030.000000
1030.000000
1030.000000
1030.000000
1030.000000
1030.000000
1030.000000
1030.000000
1030.000000
1030.000000
1030.000000
1030.000000
1030.000000
1030.000000
1030.000000
1030.000000
1030.000000
1030.000000
1030.000000
1030.000000
1030.000000
1030.000000
1030.000000
1030.000000
1030.000000
1030.000000
1030.000000
1030.000000
1030.000000
1030.000000
1030.000000
1030.000000
1030.000000
1030.000000
1030.000000
1030.000000
1030.000000
1030.000000
1030.000000
1030.000000
1030.000000
1030.000000
1030.000000
1030.000000
1030.000000
1030.000000
1030.000000
1030.000000
1030.000000
1030.000000
1030.000000
1030.000000
1030.000000
1030.000000
1030.000000
1030.000000
1030.000000
1030.000000
1030.000000
1030.000000
1030.000000
1030.000000
1030.000000
1030.000000
1030.000000
1030.000000
1030.000000
1030.000000
1030.000000
1030.000000
1030.000000
1030.000000
1030.000000
1030.000000
1030.000000
1030.000000
1030.000000
1030.000000
1030.000000
1030.000000
1030.000000
1030.000000
1030.000000
1030.000000
1030.000000
1030.000000
1030.000000
1030.000000
1030.000000
1030.000000
1030.000000
1030.000000
1030.000000
1030.000000
1030.000000
1030.000000
1030.000000
1030.000000
1030.000000
1030.000000
1030.000000
1030.000000
1030.000000
1030.000000
1030.000000
1030.000000
1030.000000
1030.000000
1030.000000
1030.000000
1030.000000
1030.000000
1030.000000
1030.000000
1030.000000
1030.000000
1030.000000
1030.000000
1030.000000
1030.000000
1030.000000
1030.000000
1030.000000
1030.000000
1030.000000
1030.000000
1030.000000
1030.000000
1030.000000
1030.000000
1030.000000
1030.000000
1030.000000
1030.000000
1030.000000
1030.000000
1030.000000
1030.000000
1030.000000
1030.000000
1030.000000
1030.000000
1030.000000
1030.000000
1030.000000
1030.000000
1030.000000
1030.000000
1030.000000
1030.000000
1030.000000
1030.000000
1030.000000
1030.000000
1030.000000
1030.000000
1030.000000
1030.000000
1030.000000
1030.000000
1030.000000
1030.000000
1030.000000
1030.000000
1030.000000
1030.000000
1030.000000
1030.000000
1030.000000
1030.000000
1030.000000
1030.000000
1030.000000
1030.000000
1030.000000
1030.000000
1030.000000
1030.000000
1030.000000
1030.000000
1030.000000
1030.000000
1030.000000
1030.000000
1030.000000
1030.000000
1030.000000
1030.000000
1030.000000
1030.000000
1030.000000
1030.000000
1030.000000
1030.000000
1030.000000
1030.000000
1030.000000
1030.000000
1030.000000
1030.000000
1030.000000
1030.000000
1030.000000
1030.000000
1030.000000
1030.000000
1030.000000
1030.000000
1030.000000
1030.000000
1030.000000
1030.000000
1030.000000
1030.000000
1030.000000
1030.000000
1030.000000
1030.000000
1030.000000
1030.000000
1030.000000
1030.000000
1030.000000
1030.000000
1030.000000
1030.000000
1030.000000
1030.000000
1030.000000
1030.000000
1030.000000
1030.000000
1030.000000
1030.000000
1030.000000
1030.000000
1030.000000
1030.000000
1030.000000
1030.000000
1030.000000
1030.000000
1030.000000
1030.000000
1030.000000
1030.000000
1030.000000
1030.000000
1030.000000
1030.000000
1030.000000
1030.000000
1030.000000
1030.000000
1030.000000
1030.000000
1030.000000
1030.000000
1030.000000
1030.000000
1030.000000
1030.000000
1030.000000
1030.000000
1030.000000
1030.000000
1030.000000
1030.000000
1030.000000
1030.000000
1030.000000
1030.000000
1030.000000
1030.000000
1030.000000
1030.000000
1030.000000
1030.000000
1030.000000
1030.000000
1030.000000
1030.000000
1030.000000
1030.000000
1030.000000
1030.000000
1030.000000
1030.000000
1030.000000
1030.000000
1030.000000
1030.000000
1030.000000
1030.000000
1030.000000
1030.000000
1030.000000
1030.000000
1030.000000
1030.000000
1030.000000
1030.000000
1030.000000
1030.000000
1030.000000
1030.000000
1030.000000
1030.000000
1030.000000
1030.000000
1030.000000
1030.000000
1030.000000
1030.000000
1030.000000
1030.000000
1030.000000
1030.000000
1030.000000
1030.000000
1030.000000
1030.000000
1030.000000
1030.000000
1030.000000
1030.000000
1030.000000
1030.000000
1030.000000
1030.000000
1030.000000
1030.000000
1030.000000
1030.000000
1030.000000
1030.000000
1030.000000
1030.000000
1030.000000
1030.000000
1030.000000
1030.000000
1030.000000
1030.000000
1030.000000
1030.000000
1030.000000
1030.000000
1030.000000
1030.000000
1030.000000
1030.000000
1030.000000
1030.000000
1030.000000
1030.000000
1030.000000
1030.000000
1030.000000
1030.000000
1030.000000
1030.000000
1030.000000
1030.000000
1030.000000
1030.000000
1030.000000
1030.000000
1030.000000
1030.000000
1030.000000
1030.000000
1030.000000
1030.000000
1030.000000
1030.000000
1030.000000
1030.000000
1030.000000
1030.000000
1030.000000
1030.000000
1030.000000
1030.000000
1030.000000
1030.000000
1030.000000
1030.000000
1030.000000
1030.000000
1030.000000
1030.000000
1030.000000
1030.000000
1030.000000
1030.000000
1030.000000
1030.000000
1030.000000
1030.000000
1030.000000
1030.000000
1030.000000
1030.000000
1030.000000
1030.000000
1030.000000
1030.000000
1030.000000
1030.000000
1030.000000
1030.000000
1030.000000
1030.000000
1030.000000
1030.000000
1030.000000
1030.000000
1030.000000
1030.000000
1030.000000
1030.000000
1030.000000
1030.000000
1030.000000
1030.000000
1030.000000
1030.000000
1030.000000
1030.000000
1030.000000
1030.000000
1030.000000
1030.000000
1030.000000
1030.000000
1030.000000
1030.000000
1030.000000
1030.000000
1030.000000
1030.000000
1030.000000
1030.000000
1030.000000
1030.000000
1030.000000
1030.000000
1030.000000
1030.000000
1030.000000
1030.000000
1030.000000
1030.000000
1030.000000
1030.000000
1030.000000
1030.000000
1030.000000
1030.000000
1030.000000
1030.000000
1030.000000
1030.000000
1030.000000
1030.000000
1030.000000
1030.000000
1030.000000
1030.000000
1030.000000
1030.000000
1030.000000
1030.000000
1030.000000
1030.000000
1030.000000
1030.000000
1030.000000
1030.000000
1030.000000
1030.000000
1030.000000
1030.000000
1030.000000
1030.000000
1030.000000
1030.000000
1030.000000
1030.000000
1030.000000
1030.000000
1030.000000
1030.000000
1030.000000
1030.000000
1030.000000
1030.000000
1030.000000
1030.000000
1030.000000
1030.000000
1030.000000
1030.000000
1030.000000
1030.000000
1030.000000
1030.000000
1030.000000
1030.000000
1030.000000
1030.000000
1030.000000
1030.000000
1030.000000
1030.000000
1030.000000
1030.000000
1030.000000
1030.000000
1030.000000
1030.000000
1030.000000
1030.000000
1030.000000
1030.000000
1030.000000
1030.000000
1030.000000
1030.000000
1030.000000
1030.000000
1030.000000
1030.000000
1030.000000
1030.000000
1030.000000
1030.000000
1030.000000
1030.000000
1030.000000
1030.000000
1030.000000
1030.000000
1030.000000
1030.000000
1030.000000
1030.000000
1030.000000
1030.000000
1030.000000
1030.000000
1030.000000
1030.000000
1030.000000
1030.000000
1030.000000
1030.000000
1030.000000
1030.000000
1030.000000
1030.000000
1030.000000
1030.000000
1030.000000
1030.000000
1030.000000
1030.000000
1030.000000
1030.000000
1030.000000
1030.000000
1030.000000
1030.000000
1030.000000
1030.000000
1030.000000
1030.000000
1030.000000
1030.000000
1030.000000
1030.000000
1030.000000
1030.000000
1030.000000
1030.000000
1030.000000
1030.000000
1030.000000
1030.000000
1030.000000
1030.000000
1030.000000
1030.000000
1030.000000
1030.000000
1030.000000
1030.000000
1030.000000
1030.000000
1030.000000
1030.000000
1030.000000
1030.000000
1030.000000
1030.000000
1030.000000
1030.000000
1030.000000
1030.000000
1030.000000
1030.000000
1030.000000
1030.000000
1030.000000
1030.000000
1030.000000
1030.000000
1030.000000
1030.000000
1030.000000
1030.000000
1030.000000
1030.000000
1030.000000
1030.000000
1030.000000
1030.000000
1030.000000
1030.000000
1030.000000
1030.000000
1030.000000
1030.000000
1030.000000
1030.000000
1030.000000
1030.000000
1030.000000
1030.000000
1030.000000
1030.000000
1030.000000
1030.000000
1030.000000
1030.000000
1030.000000
1030.000000
1030.000000
1030.000000
1030.000000
1030.000000
1030.000000
1030.000000
1030.000000
1030.000000
1030.000000
1030.000000
1030.000000
1030.000000
1030.000000
1030.000000
1030.000000
1030.000000
1030.000000
1030.000000
1030.000000
1030.000000
1030.000000
1030.000000
1030.000000
1030.000000
1030.000000
1030.000000
1030.000000
1030.000000
1030.000000
1030.000000
1030.000000
1030.000000
1030.000000
1030.000000
1030.000000
1030.000000
1030.000000
1030.000000
1030.000000
1030.000000
1030.000000
1030.000000
1030.000000
1030.000000
1030.000000
1030.000000
1030.000000
1030.000000
1030.000000
1030.000000
1030.000000
1030.000000
1030.000000
1030.000000
1030.000000
1030.000000
1030.000000
1030.000000
1030.000000
1030.000000
1030.000000
1030.000000
1030.000000
1030.000000
1030.000000
1030.000000
1030.000000
1030.000000
1030.000000
1030.000000
1030.000000
1030.000000
1030.000000
1030.000000
1030.000000
1030.000000
1030.000000
1030.000000
1030.000000
1030.000000
1030.000000
1030.000000
1030.000000
1030.000000
1030.000000
1030.000000
1030.000000
1030.000000
1030.000000
1030.000000
1030.000000
1030.000000
1030.000000
1030.000000
1030.000000
1030.000000
1030.000000
1030.000000
1030.000000
1030.000000
1030.000000
1030.000000
1030.000000
1030.000000
1030.000000
1030.000000
1030.000000
1030.000000
1030.000000
1030.000000
1030.000000
1030.000000
1030.000000
1030.000000
1030.000000
1030.000000
1030.000000
1030.000000
1030.000000
1030.000000
1030.000000
1030.000000
1030.000000
1030.000000
1030.000000
1030.000000
1030.000000
1030.000000
1030.000000
1030.000000
1030.000000
1030.000000
1030.000000
1030.000000
1030.000000
1030.000000
1030.000000
1030.000000
1030.000000
1030.000000
1030.000000
1030.000000
1030.000000
1030.000000
1030.000000
1030.000000
1030.000000
1030.000000
1030.000000
1030.000000
1030.000000
1030.000000
1030.000000
1030.000000
1030.000000
1030.000000
1030.000000
1030.000000
1030.000000
1030.000000
1030.000000
1030.000000
1030.000000
1030.000000
1030.000000
1030.000000
1030.000000
1030.000000
1030.000000
1030.000000
1030.000000
1030.000000
1030.000000
1030.000000
1030.000000
1030.000000
1030.000000
1030.000000
1030.000000
1030.000000
1030.000000
1030.000000
1030.000000
1030.000000
1030.000000
1030.000000
1030.000000
1030.000000
1030.000000
1030.000000
1030.000000
1030.000000
1030.000000
1030.000000
1030.000000
1030.000000
1030.000000
1030.000000
1030.000000
1030.000000
1030.000000
1030.000000
1030.000000
1030.000000
1030.000000
1030.000000
1030.000000
1030.000000
1030.000000
1030.000000
1030.000000
1030.000000
1030.000000
1030.000000
1030.000000
1030.000000
1030.000000
1030.000000
1030.000000
1030.000000
1030.000000
1030.000000
1030.000000
1030.000000
1030.000000
1030.000000
1030.000000
1030.000000
1030.000000
1030.000000
1030.000000
1030.000000
1030.000000
1030.000000
1030.000000
1030.000000
1030.000000
1030.000000
1030.000000
1030.000000
1030.000000
1030.000000
1030.000000
1030.000000
1030.000000
1030.000000
1030.000000
1030.000000
1030.000000
1030.000000
1030.000000
1030.000000
1030.000000
1030.000000
1030.000000
1030.000000
1030.000000
1030.000000
1030.000000
1030.000000
1030.000000
1030.000000
1030.000000
1030.000000
1030.000000
1030.000000
1030.000000
1030.000000
1030.000000
1030.000000
1030.000000
1030.000000
1030.000000
1030.000000
1030.000000
1030.000000
1030.000000
1030.000000
1030.000000
1030.000000
1030.000000
1030.000000
1030.000000
1030.000000
1030.000000
1030.000000
1030.000000
1030.000000
1030.000000
1030.000000
1030.000000
1030.000000
1030.000000
1030.000000
1030.000000
1030.000000
1030.000000
1030.000000
1030.000000
1030.000000
1030.000000
1030.000000
1030.000000
1030.000000
1030.000000
1030.000000
1030.000000
1030.000000
1030.000000
1030.000000
1030.000000
1030.000000
1030.000000
1030.000000
1030.000000
1030.000000
1030.000000
1030.000000
1030.000000
1030.000000
1030.000000
1030.000000
1030.000000
1030.000000
1030.000000
1030.000000
1030.000000
1030.000000
1030.000000
1030.000000
1030.000000
1030.000000
1030.000000
1030.000000
1030.000000
1030.000000
1030.000000
1030.000000
1030.000000
1030.000000
1030.000000
1030.000000
1030.000000
1030.000000
1030.000000
1030.000000
1030.000000
1030.000000
1030.000000
1030.000000
1030.000000
1030.000000
1030.000000
1030.000000
1030.000000
1030.000000
1030.000000
1030.000000
1030.000000
1030.000000
1030.000000
1030.000000
1030.000000
1030.000000
1030.000000
1030.000000
1030.000000
1030.000000
1030.000000
1030.000000
1030.000000
1030.000000
1030.000000
1030.000000
1030.000000
1030.000000
1030.000000
1030.000000
1030.000000
1030.000000
1030.000000
1030.000000
1030.000000
1030.000000
1030.000000
1030.000000
1030.000000
1030.000000
1030.000000
1030.000000
1030.000000
1030.000000
1030.000000
1030.000000
1030.000000
1030.000000
1030.000000
1030.000000
1030.000000
1030.000000
1030.000000
1030.000000
1030.000000
1030.000000
1030.000000
1030.000000
1030.000000
1030.000000
1030.000000
1030.000000
1030.000000
1030.000000
1030.000000
1030.000000
1030.000000
1030.000000
1030.000000
1030.000000
1030.000000
1030.000000
1030.000000
1030.000000
1030.000000
1030.000000
1030.000000
1030.000000
1030.000000
1030.000000
1030.000000
1030.000000
1030.000000
1030.000000
1030.000000
1030.000000
1030.000000
1030.000000
1030.000000
1030.000000
1030.000000
1030.000000
1030.000000
1030.000000
1030.000000
1030.000000
1030.000000
1030.000000
1030.000000
1030.000000
1030.000000
1030.000000
1030.000000
1030.000000
1030.000000
1030.000000
1030.000000
1030.000000
1030.000000
1030.000000
1030.000000
1030.000000
1030.000000
1030.000000
1030.000000
1030.000000
1030.000000
1030.000000
1030.000000
1030.000000
1030.000000
1030.000000
1030.000000
1030.000000
1030.000000
1030.000000
1030.000000
1030.000000
1030.000000
1030.000000
1030.000000
1030.000000
1030.000000
1030.000000
1030.000000
1030.000000
1030.000000
1030.000000
1030.000000
1030.000000
1030.000000
1030.000000
1030.000000
1030.000000
1030.000000
1030.000000
1030.000000
1030.000000
1030.000000
1030.000000
1030.000000
1030.000000
1030.000000
1030.000000
1030.000000
1030.000000
1030.000000
1030.000000
1030.000000
1030.000000
1030.000000
1030.000000
1030.000000
1030.000000
1030.000000
1030.000000
1030.000000
1030.000000
1030.000000
1030.000000
1030.000000
1030.000000
1030.000000
1030.000000
1030.000000
1030.000000
1030.000000
1030.000000
1030.000000
1030.000000
1030.000000
1030.000000
1030.000000
1030.000000
1030.000000
1030.000000
1030.000000
1030.000000
1030.000000
1030.000000
1030.000000
1030.000000
1030.000000
1030.000000
1030.000000
1030.000000
1030.000000
1030.000000
1030.000000
1030.000000
1030.000000
1030.000000
1030.000000
1030.000000
1030.000000
1030.000000
1030.000000
1030.000000
1030.000000
1030.000000
1030.000000
1030.000000
1030.000000
1030.000000
1030.000000
1030.000000
1030.000000
1030.000000
1030.000000
1030.000000
1030.000000
1030.000000
1030.000000
1030.000000
1030.000000
1030.000000
1030.000000
1030.000000
1030.000000
1030.000000
1030.000000
1030.000000
1030.000000
1030.000000
1030.000000
1030.000000
1030.000000
1030.000000
1030.000000
1030.000000
1030.000000
1030.000000
1030.000000
1030.000000
1030.000000
1030.000000
1030.000000
1030.000000
1030.000000
1030.000000
1030.000000
1030.000000
1030.000000
1030.000000
1030.000000
1030.000000
1030.000000
1030.000000
1030.000000
1030.000000
1030.000000
1030.000000
1030.000000
1030.000000
1030.000000
1030.000000
1030.000000
1030.000000
1030.000000
1030.000000
1030.000000
1030.000000
1030.000000
1030.000000
1030.000000
1030.000000
1030.000000
1030.000000
1030.000000
1030.000000
1030.000000
1030.000000
1030.000000
1030.000000
1030.000000
1030.000000
1030.000000
1030.000000
1030.000000
1030.000000
1030.000000
1030.000000
1030.000000
1030.000000
1030.000000
1030.000000
1030.000000
1030.000000
1030.000000
1030.000000
1030.000000
1030.000000
1030.000000
1030.000000
1030.000000
1030.000000
1030.000000
1030.000000
1030.000000
1030.000000
1030.000000
1030.000000
1030.000000
1030.000000
1030.000000
1030.000000
1030.000000
1030.000000
1030.000000
1030.000000
1030.000000
1030.000000
1030.000000
1030.000000
1030.000000
1030.000000
1030.000000
1030.000000
1030.000000
1030.000000
1030.000000
1030.000000
1030.000000
1030.000000
1030.000000
1030.000000
1030.000000
1030.000000
1030.000000
1030.000000
1030.000000
1030.000000
1030.000000
1030.000000
1030.000000
1030.000000
1030.000000
1030.000000
1030.000000
1030.000000
1030.000000
1030.000000
1030.000000
1030.000000
1030.000000
1030.000000
1030.000000
1030.000000
1030.000000
1030.000000
1030.000000
1030.000000
1030.000000
1030.000000
1030.000000
1030.000000
1030.000000
1030.000000
1030.000000
1030.000000
1030.000000
1030.000000
1030.000000
1030.000000
1030.000000
1030.000000
1030.000000
1030.000000
1030.000000
1030.000000
1030.000000
1030.000000
1030.000000
1030.000000
1030.000000
1030.000000
1030.000000
1030.000000
1030.000000
1030.000000
1030.000000
1030.000000
1030.000000
1030.000000
1030.000000
1030.000000
1030.000000
1030.000000
1030.000000
1030.000000
1030.000000
1030.000000
1030.000000
1030.000000
1030.000000
1030.000000
1030.000000
1030.000000
1030.000000
1030.000000
1030.000000
1030.000000
1030.000000
1030.000000
1030.000000
1030.000000
1030.000000
1030.000000
1030.000000
1030.000000
1030.000000
1030.000000
1030.000000
1030.000000
1030.000000
1030.000000
1030.000000
1030.000000
1030.000000
1030.000000
1030.000000
1030.000000
1030.000000
1030.000000
1030.000000
1030.000000
1030.000000
1030.000000
1030.000000
1030.000000
1030.000000
1030.000000
1030.000000
1030.000000
1030.000000
1030.000000
1030.000000
1030.000000
1030.000000
1030.000000
1030.000000
1030.000000
1030.000000
1030.000000
1030.000000
1030.000000
1030.000000
1030.000000
1030.000000
1030.000000
1030.000000
1030.000000
1030.000000
1030.000000
1030.000000
1030.000000
1030.000000
1030.000000
1030.000000
1030.000000
1030.000000
1030.000000
1030.000000
1030.000000
1030.000000
1030.000000
1030.000000
1030.000000
1030.000000
1030.000000
1030.000000
1030.000000
1030.000000
1030.000000
1030.000000
1030.000000
1030.000000
1030.000000
1030.000000
1030.000000
1030.000000
1030.000000
1030.000000
1030.000000
1030.000000
1030.000000
1030.000000
1030.000000
1030.000000
1030.000000
1030.000000
1030.000000
1030.000000
1030.000000
1030.000000
1030.000000
1030.000000
1030.000000
1030.000000
1030.000000
1030.000000
1030.000000
1030.000000
1030.000000
1030.000000
1030.000000
1030.000000
1030.000000
1030.000000
1030.000000
1030.000000
1030.000000
1030.000000
1030.000000
1030.000000
1030.000000
1030.000000
1030.000000
1030.000000
1030.000000
1030.000000
1030.000000
1030.000000
1030.000000
1030.000000
1030.000000
1030.000000
1030.000000
1030.000000
1030.000000
1030.000000
1030.000000
1030.000000
1030.000000
1030.000000
1030.000000
1030.000000
1030.000000
1030.000000
1030.000000
1030.000000
1030.000000
1030.000000
1030.000000
1030.000000
1030.000000
1030.000000
1030.000000
1030.000000
1030.000000
1030.000000
1030.000000
1030.000000
1030.000000
1030.000000
1030.000000
1030.000000
1030.000000
1030.000000
1030.000000
1030.000000
1030.000000
1030.000000
1030.000000
1030.000000
1030.000000
1030.000000
1030.000000
1030.000000
1030.000000
1030.000000
1030.000000
1030.000000
1030.000000
1030.000000
1030.000000
1030.000000
1030.000000
1030.000000
1030.000000
1030.000000
1030.000000
1030.000000
1030.000000
1030.000000
1030.000000
1030.000000
1030.000000
1030.000000
1030.000000
1030.000000
1030.000000
1030.000000
1030.000000
1030.000000
1030.000000
1030.000000
1030.000000
1030.000000
1030.000000
1030.000000
1030.000000
1030.000000
1030.000000
1030.000000
1030.000000
1030.000000
1030.000000
1030.000000
1030.000000
1030.000000
1030.000000
1030.000000
1030.000000
1030.000000
1030.000000
1030.000000
1030.000000
1030.000000
1030.000000
1030.000000
1030.000000
1030.000000
1030.000000
1030.000000
1030.000000
1030.000000
1030.000000
1030.000000
1030.000000
1030.000000
1030.000000
1030.000000
1030.000000
1030.000000
1030.000000
1030.000000
1030.000000
1030.000000
1030.000000
1030.000000
1030.000000
1030.000000
1030.000000
1030.000000
1030.000000
1030.000000
1030.000000
1030.000000
1030.000000
1030.000000
1030.000000
1030.000000
1030.000000
1030.000000
1030.000000
1030.000000
1030.000000
1030.000000
1030.000000
1030.000000
1030.000000
1030.000000
1030.000000
1030.000000
1030.000000
1030.000000
1030.000000
1030.000000
1030.000000
1030.000000
1030.000000
1030.000000
1030.000000
1030.000000
1030.000000
1030.000000
1030.000000
1030.000000
1030.000000
1030.000000
1030.000000
1030.000000
1030.000000
1030.000000
1030.000000
1030.000000
1030.000000
1030.000000
1030.000000
1030.000000
1030.000000
1030.000000
1030.000000
1030.000000
1030.000000
1030.000000
1030.000000
1030.000000
1030.000000
1030.000000
1030.000000
1030.000000
1030.000000
1030.000000
1030.000000
1030.000000
1030.000000
1030.000000
1030.000000
1030.000000
1030.000000
1030.000000
1030.000000
1030.000000
1030.000000
1030.000000
1030.000000
1030.000000
1030.000000
1030.000000
1030.000000
1030.000000
1030.000000
1030.000000
1030.000000
1030.000000
1030.000000
1030.000000
1030.000000
1030.000000
1030.000000
1030.000000
1030.000000
1030.000000
1030.000000
1030.000000
1030.000000
1030.000000
1030.000000
1030.000000
1030.000000
1030.000000
1030.000000
1030.000000
1030.000000
1030.000000
1030.000000
1030.000000
1030.000000
1030.000000
1030.000000
1030.000000
1030.000000
1030.000000
1030.000000
1030.000000
1030.000000
1030.000000
1030.000000
1030.000000
1030.000000
1030.000000
1030.000000
1030.000000
1030.000000
1030.000000
1030.000000
1030.000000
1030.000000
1030.000000
1030.000000
1030.000000
1030.000000
1030.000000
1030.000000
1030.000000
1030.000000
1030.000000
1030.000000
1030.000000
1030.000000
1030.000000
1030.000000
1030.000000
1030.000000
1030.000000
1030.000000
1030.000000
1030.000000
1030.000000
1030.000000
1030.000000
1030.000000
1030.000000
1030.000000
1030.000000
1030.000000
1030.000000
1030.000000
1030.000000
1030.000000
1030.000000
1030.000000
1030.000000
1030.000000
1030.000000
1030.000000
1030.000000
1030.000000
1030.000000
1030.000000
1030.000000
1030.000000
1030.000000
1030.000000
1030.000000
1030.000000
1030.000000
1030.000000
1030.000000
1030.000000
1030.000000
1030.000000
1030.000000
1030.000000
1030.000000
1030.000000
1030.000000
1030.000000
1030.000000
1030.000000
1030.000000
1030.000000
1030.000000
1030.000000
1030.000000
1030.000000
1030.000000
1030.000000
1030.000000
1030.000000
1030.000000
1030.000000
1030.000000
1030.000000
1030.000000
1030.000000
1030.000000
1030.000000
1030.000000
1030.000000
1030.000000
1030.000000
1030.000000
1030.000000
1030.000000
1030.000000
1030.000000
1030.000000
1030.000000
1030.000000
1030.000000
1030.000000
1030.000000
1030.000000
1030.000000
1030.000000
1030.000000
1030.000000
1030.000000
1030.000000
1030.000000
1030.000000
1030.000000
1030.000000
1030.000000
1030.000000
1030.000000
1030.000000
1030.000000
1030.000000
1030.000000
1030.000000
1030.000000
1030.000000
1030.000000
1030.000000
1030.000000
1030.000000
1030.000000
1030.000000
1030.000000
1030.000000
1030.000000
1030.000000
1030.000000
1030.000000
1030.000000
1030.000000
1030.000000
1030.000000
1030.000000
1030.000000
1030.000000
1030.000000
1030.000000
1030.000000
1030.000000
1030.000000
1030.000000
1030.000000
1030.000000
1030.000000
1030.000000
1030.000000
1030.000000
1030.000000
1030.000000
1030.000000
1030.000000
1030.000000
1030.000000
1030.000000
1030.000000
1030.000000
1030.000000
1030.000000
1030.000000
1030.000000
1030.000000
1030.000000
1030.000000
1030.000000
1030.000000
1030.000000
1030.000000
1030.000000
1030.000000
1030.000000
1030.000000
1030.000000
1030.000000
1030.000000
1030.000000
1030.000000
1030.000000
1030.000000
1030.000000
1030.000000
1030.000000
1030.000000
1030.000000
1030.000000
1030.000000
1030.000000
1030.000000
1030.000000
1030.000000
1030.000000
1030.000000
1030.000000
1030.000000
1030.000000
1030.000000
1030.000000
1030.000000
1030.000000
1030.000000
1030.000000
1030.000000
1030.000000
1030.000000
1030.000000
1030.000000
1030.000000
1030.000000
1030.000000
1030.000000
1030.000000
1030.000000
1030.000000
1030.000000
1030.000000
1030.000000
1030.000000
1030.000000
1030.000000
1030.000000
1030.000000
1030.000000
1030.000000
1030.000000
1030.000000
1030.000000
1030.000000
1030.000000
1030.000000
1030.000000
1030.000000
1030.000000
1030.000000
1030.000000
1030.000000
1030.000000
1030.000000
1030.000000
1030.000000
1030.000000
1030.000000
1030.000000
1030.000000
1030.000000
1030.000000
1030.000000
1030.000000
1030.000000
1030.000000
1030.000000
1030.000000
1030.000000
1030.000000
1030.000000
1030.000000
1030.000000
1030.000000
1030.000000
1030.000000
1030.000000
1030.000000
1030.000000
1030.000000
1030.000000
1030.000000
1030.000000
1030.000000
1030.000000
1030.000000
1030.000000
1030.000000
1030.000000
1030.000000
1030.000000
1030.000000
1030.000000
1030.000000
1030.000000
1030.000000
1030.000000
1030.000000
1030.000000
1030.000000
1030.000000
1030.000000
1030.000000
1030.000000
1030.000000
1030.000000
1030.000000
1030.000000
1030.000000
1030.000000
1030.000000
1030.000000
1030.000000
1030.000000
1030.000000
1030.000000
1030.000000
1030.000000
1030.000000
1030.000000
1030.000000
1030.000000
1030.000000
1030.000000
1030.000000
1030.000000
1030.000000
1030.000000
1030.000000
1030.000000
1030.000000
1030.000000
1030.000000
1030.000000
1030.000000
1030.000000
1030.000000
1030.000000
1030.000000
1030.000000
1030.000000
1030.000000
1030.000000
1030.000000
1030.000000
1030.000000
1030.000000
1030.000000
1030.000000
1030.000000
1030.000000
1030.000000
1030.000000
1030.000000
1030.000000
1030.000000
1030.000000
1030.000000
1030.000000
1030.000000
1030.000000
1030.000000
1030.000000
1030.000000
1030.000000
1030.000000
1030.000000
1030.000000
1030.000000
1030.000000
1030.000000
1030.000000
1030.000000
1030.000000
1030.000000
1030.000000
1030.000000
1030.000000
1030.000000
1030.000000
1030.000000
1030.000000
1030.000000
1030.000000
1030.000000
1030.000000
1030.000000
1030.000000
1030.000000
1030.000000
1030.000000
1030.000000
1030.000000
1030.000000
1030.000000
1030.000000
1030.000000
1030.000000
1030.000000
1030.000000
1030.000000
1030.000000
1030.000000
1030.000000
1030.000000
1030.000000
1030.000000
1030.000000
1030.000000
1030.000000
1030.000000
1030.000000
1030.000000
1030.000000
1030.000000
1030.000000
1030.000000
1030.000000
1030.000000
1030.000000
1030.000000
1030.000000
1030.000000
1030.000000
1030.000000
1030.000000
1030.000000
1030.000000
1030.000000
1030.000000
1030.000000
1030.000000
1030.000000
1030.000000
1030.000000
1030.000000
1030.000000
1030.000000
1030.000000
1030.000000
1030.000000
1030.000000
1030.000000
1030.000000
1030.000000
1030.000000
1030.000000
1030.000000
1030.000000
1030.000000
1030.000000
1030.000000
1030.000000
1030.000000
1030.000000
1030.000000
1030.000000
1030.000000
1030.000000
1030.000000
1030.000000
1030.000000
1030.000000
1030.000000
1030.000000
1030.000000
1030.000000
1030.000000
1030.000000
1030.000000
1030.000000
1030.000000
1030.000000
1030.000000
1030.000000
1030.000000
1030.000000
1030.000000
1030.000000
1030.000000
1030.000000
1030.000000
1030.000000
1030.000000
1030.000000
1030.000000
1030.000000
1030.000000
1030.000000
1030.000000
1030.000000
1030.000000
1030.000000
1030.000000
1030.000000
1030.000000
1030.000000
1030.000000
1030.000000
1030.000000
1030.000000
1030.000000
1030.000000
1030.000000
1030.000000
1030.000000
1030.000000
1030.000000
1030.000000
1030.000000
1030.000000
1030.000000
1030.000000
1030.000000
1030.000000
1030.000000
1030.000000
1030.000000
1030.000000
1030.000000
1030.000000
1030.000000
1030.000000
1030.000000
1030.000000
1030.000000
1030.000000
1030.000000
1030.000000
1030.000000
1030.000000
1030.000000
1030.000000
1030.000000
1030.000000
1030.000000
1030.000000
1030.000000
1030.000000
1030.000000
1030.000000
1030.000000
1030.000000
1030.000000
1030.000000
1030.000000
1030.000000
1030.000000
1030.000000
1030.000000
1030.000000
1030.000000
1030.000000
1030.000000
1030.000000
1030.000000
1030.000000
1030.000000
1030.000000
1030.000000
1030.000000
1030.000000
1030.000000
1030.000000
1030.000000
1030.000000
1030.000000
1030.000000
1030.000000
1030.000000
1030.000000
1030.000000
1030.000000
1030.000000
1030.000000
1030.000000
1030.000000
1030.000000
1030.000000
1030.000000
1030.000000
1030.000000
1030.000000
1030.000000
1030.000000
1030.000000
1030.000000
1030.000000
1030.000000
1030.000000
1030.000000
1030.000000
1030.000000
1030.000000
1030.000000
1030.000000
1030.000000
1030.000000
1030.000000
1030.000000
1030.000000
1030.000000
1030.000000
1030.000000
1030.000000
1030.000000
1030.000000
1030.000000
1030.000000
1030.000000
1030.000000
1030.000000
1030.000000
1030.000000
1030.000000
1030.000000
1030.000000
1030.000000
1030.000000
1030.000000
1030.000000
1030.000000
1030.000000
1030.000000
1030.000000
1030.000000
1030.000000
1030.000000
1030.000000
1030.000000
1030.000000
1030.000000
1030.000000
1030.000000
1030.000000
1030.000000
1030.000000
1030.000000
1030.000000
1030.000000
1030.000000
1030.000000
1030.000000
1030.000000
1030.000000
1030.000000
1030.000000
1030.000000
1030.000000
1030.000000
1030.000000
1030.000000
1030.000000
1030.000000
1030.000000
1030.000000
1030.000000
1030.000000
1030.000000
1030.000000
1030.000000
1030.000000
1030.000000
1030.000000
1030.000000
1030.000000
1030.000000
1030.000000
1030.000000
1030.000000
1030.000000
1030.000000
1030.000000
1030.000000
1030.000000
1030.000000
1030.000000
1030.000000
1030.000000
1030.000000
1030.000000
1030.000000
1030.000000
1030.000000
1030.000000
1030.000000
1030.000000
1030.000000
1030.000000
1030.000000
1030.000000
1030.000000
1030.000000
1030.000000
1030.000000
1030.000000
1030.000000
1030.000000
1030.000000
1030.000000
1030.000000
1030.000000
1030.000000
1030.000000
1030.000000
1030.000000
1030.000000
1030.000000
1030.000000
1030.000000
1030.000000
1030.000000
1030.000000
1030.000000
1030.000000
1030.000000
1030.000000
1030.000000
1030.000000
1030.000000
1030.000000
1030.000000
1030.000000
1030.000000
1030.000000
1030.000000
1030.000000
1030.000000
1030.000000
1030.000000
1030.000000
1030.000000
1030.000000
1030.000000
1030.000000
1030.000000
1030.000000
1030.000000
1030.000000
1030.000000
1030.000000
1030.000000
1030.000000
1030.000000
1030.000000
1030.000000
1030.000000
1030.000000
1030.000000
1030.000000
1030.000000
1030.000000
1030.000000
1030.000000
1030.000000
1030.000000
1030.000000
1030.000000
1030.000000
1030.000000
1030.000000
1030.000000
1030.000000
1030.000000
1030.000000
1030.000000
1030.000000
1030.000000
1030.000000
1030.000000
1030.000000
1030.000000
1030.000000
1030.000000
1030.000000
1030.000000
1030.000000
1030.000000
1030.000000
1030.000000
1030.000000
1030.000000
1030.000000
1030.000000
1030.000000
1030.000000
1030.000000
1030.000000
1030.000000
1030.000000
1030.000000
1030.000000
1030.000000
1030.000000
1030.000000
1030.000000
1030.000000
1030.000000
1030.000000
1030.000000
1030.000000
1030.000000
1030.000000
1030.000000
1030.000000
1030.000000
1030.000000
1030.000000
1030.000000
1030.000000
1030.000000
1030.000000
1030.000000
1030.000000
1030.000000
1030.000000
1030.000000
1030.000000
1030.000000
1030.000000
1030.000000
1030.000000
1030.000000
1030.000000
1030.000000
1030.000000
1030.000000
1030.000000
1030.000000
1030.000000
1030.000000
1030.000000
1030.000000
1030.000000
1030.000000
1030.000000
1030.000000
1030.000000
1030.000000
1030.000000
1030.000000
1030.000000
1030.000000
1030.000000
1030.000000
1030.000000
1030.000000
1030.000000
1030.000000
1030.000000
1030.000000
1030.000000
1030.000000
1030.000000
1030.000000
1030.000000
1030.000000
1030.000000
1030.000000
1030.000000
1030.000000
1030.000000
1030.000000
1030.000000
1030.000000
1030.000000
1030.000000
1030.000000
1030.000000
1030.000000
1030.000000
1030.000000
1030.000000
1030.000000
1030.000000
1030.000000
1030.000000
1030.000000
1030.000000
1030.000000
1030.000000
1030.000000
1030.000000
1030.000000
1030.000000
1030.000000
1030.000000
1030.000000
1030.000000
1030.000000
1030.000000
1030.000000
1030.000000
1030.000000
1030.000000
1030.000000
1030.000000
1030.000000
1030.000000
1030.000000
1030.000000
1030.000000
1030.000000
1030.000000
1030.000000
1030.000000
1030.000000
1030.000000
1030.000000
1030.000000
1030.000000
1030.000000
1030.000000
1030.000000
1030.000000
1030.000000
1030.000000
1030.000000
1030.000000
1030.000000
1030.000000
1030.000000
1030.000000
1030.000000
1030.000000
1030.000000
1030.000000
1030.000000
1030.000000
1030.000000
1030.000000
1030.000000
1030.000000
1030.000000
1030.000000
1030.000000
1030.000000
1030.000000
1030.000000
1030.000000
1030.000000
1030.000000
1030.000000
1030.000000
1030.000000
1030.000000
1030.000000
1030.000000
1030.000000
1030.000000
1030.000000
1030.000000
1030.000000
1030.000000
1030.000000
1030.000000
1030.000000
1030.000000
1030.000000
1030.000000
1030.000000
1030.000000
1030.000000
1030.000000
1030.000000
1030.000000
1030.000000
1030.000000
1030.000000
1030.000000
1030.000000
1030.000000
1030.000000
1030.000000
1030.000000
1030.000000
1030.000000
1030.000000
1030.000000
1030.000000
1030.000000
1030.000000
1030.000000
1030.000000
1030.000000
1030.000000
1030.000000
1030.000000
1030.000000
1030.000000
1030.000000
1030.000000
1030.000000
1030.000000
1030.000000
1030.000000
1030.000000
1030.000000
1030.000000
1030.000000
1030.000000
1030.000000
1030.000000
1030.000000
1030.000000
1030.000000
1030.000000
1030.000000
1030.000000
1030.000000
1030.000000
1030.000000
1030.000000
1030.000000
1030.000000
1030.000000
1030.000000
1030.000000
1030.000000
1030.000000
1030.000000
1030.000000
1030.000000
1030.000000
1030.000000
1030.000000
1030.000000
1030.000000
1030.000000
1030.000000
1030.000000
1030.000000
1030.000000
1030.000000
1030.000000
1030.000000
1030.000000
1030.000000
1030.000000
1030.000000
1030.000000
1030.000000
1030.000000
1030.000000
1030.000000
1030.000000
1030.000000
1030.000000
1030.000000
1030.000000
1030.000000
1030.000000
1030.000000
1030.000000
1030.000000
1030.000000
1030.000000
1030.000000
1030.000000
1030.000000
1030.000000
1030.000000
1030.000000
1030.000000
1030.000000
1030.000000
1030.000000
1030.000000
1030.000000
1030.000000
1030.000000
1030.000000
1030.000000
1030.000000
1030.000000
1030.000000
1030.000000
1030.000000
1030.000000
1030.000000
1030.000000
1030.000000
1030.000000
1030.000000
1030.000000
1030.000000
1030.000000
1030.000000
1030.000000
1030.000000
1030.000000
1030.000000
1030.000000
1030.000000
1030.000000
1030.000000
1030.000000
1030.000000
1030.000000
1030.000000
1030.000000
1030.000000
1030.000000
1030.000000
1030.000000
1030.000000
1030.000000
1030.000000
1030.000000
1030.000000
1030.000000
1030.000000
1030.000000
1030.000000
1030.000000
1030.000000
1030.000000
1030.000000
1030.000000
1030.000000
1030.000000
1030.000000
1030.000000
1030.000000
1030.000000
1030.000000
1030.000000
1030.000000
1030.000000
1030.000000
1030.000000
1030.000000
1030.000000
1030.000000
1030.000000
1030.000000
1030.000000
1030.000000
1030.000000
1030.000000
1030.000000
1030.000000
1030.000000
1030.000000
1030.000000
1030.000000
1030.000000
1030.000000
1030.000000
1030.000000
1030.000000
1030.000000
1030.000000
1030.000000
1030.000000
1030.000000
1030.000000
1030.000000
1030.000000
1030.000000
1030.000000
1030.000000
1030.000000
1030.000000
1030.000000
1030.000000
1030.000000
1030.000000
1030.000000
1030.000000
1030.000000
1030.000000
1030.000000
1030.000000
1030.000000
1030.000000
1030.000000
1030.000000
1030.000000
1030.000000
1030.000000
1030.000000
1030.000000
1030.000000
1030.000000
1030.000000
1030.000000
1030.000000
1030.000000
1030.000000
1030.000000
1030.000000
1030.000000
1030.000000
1030.000000
1030.000000
1030.000000
1030.000000
1030.000000
1030.000000
1030.000000
1030.000000
1030.000000
1030.000000
1030.000000
1030.000000
1030.000000
1030.000000
1030.000000
1030.000000
1030.000000
1030.000000
1030.000000
1030.000000
1030.000000
1030.000000
1030.000000
1030.000000
1030.000000
1030.000000
1030.000000
1030.000000
1030.000000
1030.000000
1030.000000
1030.000000
1030.000000
1030.000000
1030.000000
1030.000000
1030.000000
1030.000000
1030.000000
1030.000000
1030.000000
1030.000000
1030.000000
1030.000000
1030.000000
1030.000000
1030.000000
1030.000000
1030.000000
1030.000000
1030.000000
1030.000000
1030.000000
1030.000000
1030.000000
1030.000000
1030.000000
1030.000000
1030.000000
1030.000000
1030.000000
1030.000000
1030.000000
1030.000000
1030.000000
1030.000000
1030.000000
1030.000000
1030.000000
1030.000000
1030.000000
1030.000000
1030.000000
1030.000000
1030.000000
1030.000000
1030.000000
1030.000000
1030.000000
1030.000000
1030.000000
1030.000000
1030.000000
1030.000000
1030.000000
1030.000000
1030.000000
1030.000000
1030.000000
1030.000000
1030.000000
1030.000000
1030.000000
1030.000000
1030.000000
1030.000000
1030.000000
1030.000000
1030.000000
1030.000000
1030.000000
1030.000000
1030.000000
1030.000000
1030.000000
1030.000000
1030.000000
1030.000000
1030.000000
1030.000000
1030.000000
1030.000000
1030.000000
1030.000000
1030.000000
1030.000000
1030.000000
1030.000000
1030.000000
1030.000000
1030.000000
1030.000000
1030.000000
1030.000000
1030.000000
1030.000000
1030.000000
1030.000000
1030.000000
1030.000000
1030.000000
1030.000000
1030.000000
1030.000000
1030.000000
1030.000000
1030.000000
1030.000000
1030.000000
1030.000000
1030.000000
1030.000000
1030.000000
1030.000000
1030.000000
1030.000000
1030.000000
1030.000000
1030.000000
1030.000000
1030.000000
1030.000000
1030.000000
1030.000000
1030.000000
1030.000000
1030.000000
1030.000000
1030.000000
1030.000000
1030.000000
1030.000000
1030.000000
1030.000000
1030.000000
1030.000000
1030.000000
1030.000000
1030.000000
1030.000000
1030.000000
1030.000000
1030.000000
1030.000000
1030.000000
1030.000000
1030.000000
1030.000000
1030.000000
1030.000000
1030.000000
1030.000000
1030.000000
1030.000000
1030.000000
1030.000000
1030.000000
1030.000000
1030.000000
1030.000000
1030.000000
1030.000000
1030.000000
1030.000000
1030.000000
1030.000000
1030.000000
1030.000000
1030.000000
1030.000000
1030.000000
1030.000000
1030.000000
1030.000000
1030.000000
1030.000000
1030.000000
1030.000000
1030.000000
1030.000000
1030.000000
1030.000000
1030.000000
1030.000000
1030.000000
1030.000000
1030.000000
1030.000000
1030.000000
1030.000000
1030.000000
1030.000000
1030.000000
1030.000000
1030.000000
1030.000000
1030.000000
1030.000000
1030.000000
1030.000000
1030.000000
1030.000000
1030.000000
1030.000000
1030.000000
1030.000000
1030.000000
1030.000000
1030.000000
1030.000000
1030.000000
1030.000000
1030.000000
1030.000000
1030.000000
1030.000000
1030.000000
1030.000000
1030.000000
1030.000000
1030.000000
1030.000000
1030.000000
1030.000000
1030.000000
1030.000000
1030.000000
1030.000000
1030.000000
1030.000000
1030.000000
1030.000000
1030.000000
1030.000000
1030.000000
1030.000000
1030.000000
1030.000000
1030.000000
1030.000000
1030.000000
1030.000000
1030.000000
1030.000000
1030.000000
1030.000000
1030.000000
1030.000000
1030.000000
1030.000000
1030.000000
1030.000000
1030.000000
1030.000000
1030.000000
1030.000000
1030.000000
1030.000000
1030.000000
1030.000000
1030.000000
1030.000000
1030.000000
1030.000000
1030.000000
1030.000000
1030.000000
1030.000000
1030.000000
1030.000000
1030.000000
1030.000000
1030.000000
1030.000000
1030.000000
1030.000000
1030.000000
1030.000000
1030.000000
1030.000000
1030.000000
1030.000000
1030.000000
1030.000000
1030.000000
1030.000000
1030.000000
1030.000000
1030.000000
1030.000000
1030.000000
1030.000000
1030.000000
1030.000000
1030.000000
1030.000000
1030.000000
1030.000000
1030.000000
1030.000000
1030.000000
1030.000000
1030.000000
1030.000000
1030.000000
1030.000000
1030.000000
1030.000000
1030.000000
1030.000000
1030.000000
1030.000000
1030.000000
1030.000000
1030.000000
1030.000000
1030.000000
1030.000000
1030.000000
1030.000000
1030.000000
1030.000000
1030.000000
1030.000000
1030.000000
1030.000000
1030.000000
1030.000000
1030.000000
1030.000000
1030.000000
1030.000000
1030.000000
1030.000000
1030.000000
1030.000000
1030.000000
1030.000000
1030.000000
1030.000000
1030.000000
1030.000000
1030.000000
1030.000000
1030.000000
1030.000000
1030.000000
1030.000000
1030.000000
1030.000000
1030.000000
1030.000000
1030.000000
1030.000000
1030.000000
1030.000000
1030.000000
1030.000000
1030.000000
1030.000000
1030.000000
1030.000000
1030.000000
1030.000000
1030.000000
1030.000000
1030.000000
1030.000000
1030.000000
1030.000000
1030.000000
1030.000000
1030.000000
1030.000000
1030.000000
1030.000000
1030.000000
1030.000000
1030.000000
1030.000000
1030.000000
1030.000000
1030.000000
1030.000000
1030.000000
1030.000000
1030.000000
1030.000000
1030.000000
1030.000000
1030.000000
1030.000000
1030.000000
1030.000000
1030.000000
1030.000000
1030.000000
1030.000000
1030.000000
1030.000000
1030.000000
1030.000000
1030.000000
1030.000000
1030.000000
1030.000000
1030.000000
1030.000000
1030.000000
1030.000000
1030.000000
1030.000000
1030.000000
1030.000000
1030.000000
1030.000000
1030.000000
1030.000000
1030.000000
1030.000000
1030.000000
1030.000000
1030.000000
1030.000000
1030.000000
1030.000000
1030.000000
1030.000000
1030.000000
1030.000000
1030.000000
1030.000000
1030.000000
1030.000000
1030.000000
1030.000000
1030.000000
1030.000000
1030.000000
1030.000000
1030.000000
1030.000000
1030.000000
1030.000000
1030.000000
1030.000000
1030.000000
1030.000000
1030.000000
1030.000000
1030.000000
1030.000000
1030.000000
1030.000000
1030.000000
1030.000000
1030.000000
1030.000000
1030.000000
1030.000000
1030.000000
1030.000000
1030.000000
1030.000000
1030.000000
1030.000000
1030.000000
1030.000000
1030.000000
1030.000000
1030.000000
1030.000000
1030.000000
1030.000000
1030.000000
1030.000000
1030.000000
1030.000000
1030.000000
1030.000000
1030.000000
1030.000000
1030.000000
1030.000000
1030.000000
1030.000000
1030.000000
1030.000000
1030.000000
1030.000000
1030.000000
1030.000000
1030.000000
1030.000000
1030.000000
1030.000000
1030.000000
1030.000000
1030.000000
1030.000000
1030.000000
1030.000000
1030.000000
1030.000000
1030.000000
1030.000000
1030.000000
1030.000000
1030.000000
1030.000000
1030.000000
1030.000000
1030.000000
1030.000000
1030.000000
1030.000000
1030.000000
1030.000000
1030.000000
1030.000000
1030.000000
1030.000000
1030.000000
1030.000000
1030.000000
1030.000000
1030.000000
1030.000000
1030.000000
1030.000000
1030.000000
1030.000000
1030.000000
1030.000000
1030.000000
1030.000000
1030.000000
1030.000000
1030.000000
1030.000000
1030.000000
1030.000000
1030.000000
1030.000000
1030.000000
1030.000000
1030.000000
1030.000000
1030.000000
1030.000000
1030.000000
1030.000000
1030.000000
1030.000000
1030.000000
1030.000000
1030.000000
1030.000000
1030.000000
1030.000000
1030.000000
1030.000000
1030.000000
1030.000000
1030.000000
1030.000000
1030.000000
1030.000000
1030.000000
1030.000000
1030.000000
1030.000000
1030.000000
1030.000000
1030.000000
1030.000000
1030.000000
1030.000000
1030.000000
1030.000000
1030.000000
1030.000000
1030.000000
1030.000000
1030.000000
1030.000000
1030.000000
1030.000000
1030.000000
1030.000000
1030.000000
1030.000000
1030.000000
1030.000000
1030.000000
1030.000000
1030.000000
1030.000000
1030.000000
1030.000000
1030.000000
1030.000000
1030.000000
1030.000000
1030.000000
1030.000000
1030.000000
1030.000000
1030.000000
1030.000000
1030.000000
1030.000000
1030.000000
1030.000000
1030.000000
1030.000000
1030.000000
1030.000000
1030.000000
1030.000000
1030.000000
1030.000000
1030.000000
1030.000000
1030.000000
1030.000000
1030.000000
1030.000000
1030.000000
1030.000000
1030.000000
1030.000000
1030.000000
1030.000000
1030.000000
1030.000000
1030.000000
1030.000000
1030.000000
1030.000000
1030.000000
1030.000000
1030.000000
1030.000000
1030.000000
1030.000000
1030.000000
1030.000000
1030.000000
1030.000000
1030.000000
1030.000000
1030.000000
1030.000000
1030.000000
1030.000000
1030.000000
1030.000000
1030.000000
1030.000000
1030.000000
1030.000000
1030.000000
1030.000000
1030.000000
1030.000000
1030.000000
1030.000000
1030.000000
1030.000000
1030.000000
1030.000000
1030.000000
1030.000000
1030.000000
1030.000000
1030.000000
1030.000000
1030.000000
1030.000000
1030.000000
1030.000000
1030.000000
1030.000000
1030.000000
1030.000000
1030.000000
1030.000000
1030.000000
1030.000000
1030.000000
1030.000000
1030.000000
1030.000000
1030.000000
1030.000000
1030.000000
1030.000000
1030.000000
1030.000000
1030.000000
1030.000000
1030.000000
1030.000000
1030.000000
1030.000000
1030.000000
1030.000000
1030.000000
1030.000000
1030.000000
1030.000000
1030.000000
1030.000000
1030.000000
1030.000000
1030.000000
1030.000000
1030.000000
1030.000000
1030.000000
1030.000000
1030.000000
1030.000000
1030.000000
1030.000000
1030.000000
1030.000000
1030.000000
1030.000000
1030.000000
1030.000000
1030.000000
1030.000000
1030.000000
1030.000000
1030.000000
1030.000000
1030.000000
1030.000000
1030.000000
1030.000000
1030.000000
1030.000000
1030.000000
1030.000000
1030.000000
1030.000000
1030.000000
1030.000000
1030.000000
1030.000000
1030.000000
1030.000000
1030.000000
1030.000000
1030.000000
1030.000000
1030.000000
1030.000000
1030.000000
1030.000000
1030.000000
1030.000000
1030.000000
1030.000000
1030.000000
1030.000000
1030.000000
1030.000000
1030.000000
1030.000000
1030.000000
1030.000000
1030.000000
1030.000000
1030.000000
1030.000000
1030.000000
1030.000000
1030.000000
1030.000000
1030.000000
1030.000000
1030.000000
1030.000000
1030.000000
1030.000000
1030.000000
1030.000000
1030.000000
1030.000000
1030.000000
1030.000000
1030.000000
1030.000000
1030.000000
1030.000000
1030.000000
1030.000000
1030.000000
1030.000000
1030.000000
1030.000000
1030.000000
1030.000000
1030.000000
1030.000000
1030.000000
1030.000000
1030.000000
1030.000000
1030.000000
1030.000000
1030.000000
1030.000000
1030.000000
1030.000000
1030.000000
1030.000000
1030.000000
1030.000000
1030.000000
1030.000000
1030.000000
1030.000000
1030.000000
1030.000000
1030.000000
1030.000000
1030.000000
1030.000000
1030.000000
1030.000000
1030.000000
1030.000000
1030.000000
1030.000000
1030.000000
1030.000000
1030.000000
1030.000000
1030.000000
1030.000000
1030.000000
1030.000000
1030.000000
1030.000000
1030.000000
1030.000000
1030.000000
1030.000000
1030.000000
1030.000000
1030.000000
1030.000000
1030.000000
1030.000000
1030.000000
1030.000000
1030.000000
1030.000000
1030.000000
1030.000000
1030.000000
1030.000000
1030.000000
1030.000000
1030.000000
1030.000000
1030.000000
1030.000000
1030.000000
1030.000000
1030.000000
1030.000000
1030.000000
1030.000000
1030.000000
1030.000000
1030.000000
1030.000000
1030.000000
1030.000000
1030.000000
1030.000000
1030.000000
1030.000000
1030.000000
1030.000000
1030.000000
1030.000000
1030.000000
1030.000000
1030.000000
1030.000000
1030.000000
1030.000000
1030.000000
1030.000000
1030.000000
1030.000000
1030.000000
1030.000000
1030.000000
1030.000000
1030.000000
1030.000000
1030.000000
1030.000000
1030.000000
1030.000000
1030.000000
1030.000000
1030.000000
1030.000000
1030.000000
1030.000000
1030.000000
1030.000000
1030.000000
1030.000000
1030.000000
1030.000000
1030.000000
1030.000000
1030.000000
1030.000000
1030.000000
1030.000000
1030.000000
1030.000000
1030.000000
1030.000000
1030.000000
1030.000000
1030.000000
1030.000000
1030.000000
1030.000000
1030.000000
1030.000000
1030.000000
1030.000000
1030.000000
1030.000000
1030.000000
1030.000000
1030.000000
1030.000000
1030.000000
1030.000000
1030.000000
1030.000000
1030.000000
1030.000000
1030.000000
1030.000000
1030.000000
1030.000000
1030.000000
1030.000000
1030.000000
1030.000000
1030.000000
1030.000000
1030.000000
1030.000000
1030.000000
1030.000000
1030.000000
1030.000000
1030.000000
1030.000000
1030.000000
1030.000000
1030.000000
1030.000000
1030.000000
1030.000000
1030.000000
1030.000000
1030.000000
1030.000000
1030.000000
1030.000000
1030.000000
1030.000000
1030.000000
1030.000000
1030.000000
1030.000000
1030.000000
1030.000000
1030.000000
1030.000000
1030.000000
1030.000000
1030.000000
1030.000000
1030.000000
1030.000000
1030.000000
1030.000000
1030.000000
1030.000000
1030.000000
1030.000000
1030.000000
1030.000000
1030.000000
1030.000000
1030.000000
1030.000000
1030.000000
1030.000000
1030.000000
1030.000000
1030.000000
1030.000000
1030.000000
1030.000000
1030.000000
1030.000000
1030.000000
1030.000000
1030.000000
1030.000000
1030.000000
1030.000000
1030.000000
1030.000000
1030.000000
1030.000000
1030.000000
1030.000000
1030.000000
1030.000000
1030.000000
1030.000000
1030.000000
1030.000000
1030.000000
1030.000000
1030.000000
1030.000000
1030.000000
1030.000000
1030.000000
1030.000000
1030.000000
1030.000000
1030.000000
1030.000000
1030.000000
1030.000000
1030.000000
1030.000000
1030.000000
1030.000000
1030.000000
1030.000000
1030.000000
1030.000000
1030.000000
1030.000000
1030.000000
1030.000000
1030.000000
1030.000000
1030.000000
1030.000000
1030.000000
1030.000000
1030.000000
1030.000000
1030.000000
1030.000000
1030.000000
1030.000000
1030.000000
1030.000000
1030.000000
1030.000000
1030.000000
1030.000000
1030.000000
1030.000000
1030.000000
1030.000000
1030.000000
1030.000000
1030.000000
1030.000000
1030.000000
1030.000000
1030.000000
1030.000000
1030.000000
1030.000000
1030.000000
1030.000000
1030.000000
1030.000000
1030.000000
1030.000000
1030.000000
1030.000000
1030.000000
1030.000000
1030.000000
1030.000000
1030.000000
1030.000000
1030.000000
1030.000000
1030.000000
1030.000000
1030.000000
1030.000000
1030.000000
1030.000000
1030.000000
1030.000000
1030.000000
1030.000000
1030.000000
1030.000000
1030.000000
1030.000000
1030.000000
1030.000000
1030.000000
1030.000000
1030.000000
1030.000000
1030.000000
1030.000000
1030.000000
1030.000000
1030.000000
1030.000000
1030.000000
1030.000000
1030.000000
1030.000000
1030.000000
1030.000000
1030.000000
1030.000000
1030.000000
1030.000000
1030.000000
1030.000000
1030.000000
1030.000000
1030.000000
1030.000000
1030.000000
1030.000000
1030.000000
1030.000000
1030.000000
1030.000000
1030.000000
1030.000000
1030.000000
1030.000000
1030.000000
1030.000000
1030.000000
1030.000000
1030.000000
1030.000000
1030.000000
1030.000000
1030.000000
1030.000000
1030.000000
1030.000000
1030.000000
1030.000000
1030.000000
1030.000000
1030.000000
1030.000000
1030.000000
1030.000000
1030.000000
1030.000000
1030.000000
1030.000000
1030.000000
1030.000000
1030.000000
1030.000000
1030.000000
1030.000000
1030.000000
1030.000000
1030.000000
1030.000000
1030.000000
1030.000000
1030.000000
1030.000000
1030.000000
1030.000000
1030.000000
1030.000000
1030.000000
1030.000000
1030.000000
1030.000000
1030.000000
1030.000000
1030.000000
1030.000000
1030.000000
1030.000000
1030.000000
1030.000000
1030.000000
1030.000000
1030.000000
1030.000000
1030.000000
1030.000000
1030.000000
1030.000000
1030.000000
1030.000000
1030.000000
1030.000000
1030.000000
1030.000000
1030.000000
1030.000000
1030.000000
1030.000000
1030.000000
1030.000000
1030.000000
1030.000000
1030.000000
1030.000000
1030.000000
1030.000000
1030.000000
1030.000000
1030.000000
1030.000000
1030.000000
1030.000000
1030.000000
1030.000000
1030.000000
1030.000000
1030.000000
1030.000000
1030.000000
1030.000000
1030.000000
1030.000000
1030.000000
1030.000000
1030.000000
1030.000000
1030.000000
1030.000000
1030.000000
1030.000000
1030.000000
1030.000000
1030.000000
1030.000000
1030.000000
1030.000000
1030.000000
1030.000000
1030.000000
1030.000000
1030.000000
1030.000000
1030.000000
1030.000000
1030.000000
1030.000000
1030.000000
1030.000000
1030.000000
1030.000000
1030.000000
1030.000000
1030.000000
1030.000000
1030.000000
1030.000000
1030.000000
1030.000000
1030.000000
1030.000000
1030.000000
1030.000000
1030.000000
1030.000000
1030.000000
1030.000000
1030.000000
1030.000000
1030.000000
1030.000000
1030.000000
1030.000000
1030.000000
1030.000000
1030.000000
1030.000000
1030.000000
1030.000000
1030.000000
1030.000000
1030.000000
1030.000000
1030.000000
1030.000000
1030.000000
1030.000000
1030.000000
1030.000000
1030.000000
1030.000000
1030.000000
1030.000000
1030.000000
1030.000000
1030.000000
1030.000000
1030.000000
1030.000000
1030.000000
1030.000000
1030.000000
1030.000000
1030.000000
1030.000000
1030.000000
1030.000000
1030.000000
1030.000000
1030.000000
1030.000000
1030.000000
1030.000000
1030.000000
1030.000000
1030.000000
1030.000000
1030.000000
1030.000000
1030.000000
1030.000000
1030.000000
1030.000000
1030.000000
1030.000000
1030.000000
1030.000000
1030.000000
1030.000000
1030.000000
1030.000000
1030.000000
1030.000000
1030.000000
1030.000000
1030.000000
1030.000000
1030.000000
1030.000000
1030.000000
1030.000000
1030.000000
1030.000000
1030.000000
1030.000000
1030.000000
1030.000000
1030.000000
1030.000000
1030.000000
1030.000000
1030.000000
1030.000000
1030.000000
1030.000000
1030.000000
1030.000000
1030.000000
1030.000000
1030.000000
1030.000000
1030.000000
1030.000000
1030.000000
1030.000000
1030.000000
1030.000000
1030.000000
1030.000000
1030.000000
1030.000000
1030.000000
1030.000000
1030.000000
1030.000000
1030.000000
1030.000000
1030.000000
1030.000000
1030.000000
1030.000000
1030.000000
1030.000000
1030.000000
1030.000000
1030.000000
1030.000000
1030.000000
1030.000000
1030.000000
1030.000000
1030.000000
1030.000000
1030.000000
1030.000000
1030.000000
1030.000000
1030.000000
1030.000000
1030.000000
1030.000000
1030.000000
1030.000000
1030.000000
1030.000000
1030.000000
1030.000000
1030.000000
1030.000000
1030.000000
1030.000000
1030.000000
1030.000000
1030.000000
1030.000000
1030.000000
1030.000000
1030.000000
1030.000000
1030.000000
1030.000000
1030.000000
1030.000000
1030.000000
1030.000000
1030.000000
1030.000000
1030.000000
1030.000000
1030.000000
1030.000000
1030.000000
1030.000000
1030.000000
1030.000000
1030.000000
1030.000000
1030.000000
1030.000000
1030.000000
1030.000000
1030.000000
1030.000000
1030.000000
1030.000000
1030.000000
1030.000000
1030.000000
1030.000000
1030.000000
1030.000000
1030.000000
1030.000000
1030.000000
1030.000000
1030.000000
1030.000000
1030.000000
1030.000000
1030.000000
1030.000000
1030.000000
1030.000000
1030.000000
1030.000000
1030.000000
1030.000000
1030.000000
1030.000000
1030.000000
1030.000000
1030.000000
1030.000000
1030.000000
1030.000000
1030.000000
1030.000000
1030.000000
1030.000000
1030.000000
1030.000000
1030.000000
1030.000000
1030.000000
1030.000000
1030.000000
1030.000000
1030.000000
1030.000000
1030.000000
1030.000000
1030.000000
1030.000000
1030.000000
1030.000000
1030.000000
1030.000000
1030.000000
1030.000000
1030.000000
1030.000000
1030.000000
1030.000000
1030.000000
1030.000000
1030.000000
1030.000000
1030.000000
1030.000000
1030.000000
1030.000000
1030.000000
1030.000000
1030.000000
1030.000000
1030.000000
1030.000000
1030.000000
1030.000000
1030.000000
1030.000000
1030.000000
1030.000000
1030.000000
1030.000000
1030.000000
1030.000000
1030.000000
1030.000000
1030.000000
1030.000000
1030.000000
1030.000000
1030.000000
1030.000000
1030.000000
1030.000000
1030.000000
1030.000000
1030.000000
1030.000000
1030.000000
1030.000000
1030.000000
1030.000000
1030.000000
1030.000000
1030.000000
1030.000000
1030.000000
1030.000000
1030.000000
1030.000000
1030.000000
1030.000000
1030.000000
1030.000000
1030.000000
1030.000000
1030.000000
1030.000000
1030.000000
1030.000000
1030.000000
1030.000000
1030.000000
1030.000000
1030.000000
1030.000000
1030.000000
1030.000000
1030.000000
1030.000000
1030.000000
1030.000000
1030.000000
1030.000000
1030.000000
1030.000000
1030.000000
1030.000000
1030.000000
1030.000000
1030.000000
1030.000000
1030.000000
1030.000000
1030.000000
1030.000000
1030.000000
1030.000000
1030.000000
1030.000000
1030.000000
1030.000000
1030.000000
1030.000000
1030.000000
1030.000000
1030.000000
1030.000000
1030.000000
1030.000000
1030.000000
1030.000000
1030.000000
1030.000000
1030.000000
1030.000000
1030.000000
1030.000000
1030.000000
1030.000000
1030.000000
1030.000000
1030.000000
1030.000000
1030.000000
1030.000000
1030.000000
1030.000000
1030.000000
1030.000000
1030.000000
1030.000000
1030.000000
1030.000000
1030.000000
1030.000000
1030.000000
1030.000000
1030.000000
1030.000000
1030.000000
1030.000000
1030.000000
1030.000000
1030.000000
1030.000000
1030.000000
1030.000000
1030.000000
1030.000000
1030.000000
1030.000000
1030.000000
1030.000000
1030.000000
1030.000000
1030.000000
1030.000000
1030.000000
1030.000000
1030.000000
1030.000000
1030.000000
1030.000000
1030.000000
1030.000000
1030.000000
1030.000000
1030.000000
1030.000000
1030.000000
1030.000000
1030.000000
1030.000000
1030.000000
1030.000000
1030.000000
1030.000000
1030.000000
1030.000000
1030.000000
1030.000000
1030.000000
1030.000000
1030.000000
1030.000000
1030.000000
1030.000000
1030.000000
1030.000000
1030.000000
1030.000000
1030.000000
1030.000000
1030.000000
1030.000000
1030.000000
1030.000000
1030.000000
1030.000000
1030.000000
1030.000000
1030.000000
1030.000000
1030.000000
1030.000000
1030.000000
1030.000000
1030.000000
1030.000000
1030.000000
1030.000000
1030.000000
1030.000000
1030.000000
1030.000000
1030.000000
1030.000000
1030.000000
1030.000000
1030.000000
1030.000000
1030.000000
1030.000000
1030.000000
1030.000000
1030.000000
1030.000000
1030.000000
1030.000000
1030.000000
1030.000000
1030.000000
1030.000000
1030.000000
1030.000000
1030.000000
1030.000000
1030.000000
1030.000000
1030.000000
1030.000000
1030.000000
1030.000000
1030.000000
1030.000000
1030.000000
1030.000000
1030.000000
1030.000000
1030.000000
1030.000000
1030.000000
1030.000000
1030.000000
1030.000000
1030.000000
1030.000000
1030.000000
1030.000000
1030.000000
1030.000000
1030.000000
1030.000000
1030.000000
1030.000000
1030.000000
1030.000000
1030.000000
1030.000000
1030.000000
1030.000000
1030.000000
1030.000000
1030.000000
1030.000000
1030.000000
1030.000000
1030.000000
1030.000000
1030.000000
1030.000000
1030.000000
1030.000000
1030.000000
1030.000000
1030.000000
1030.000000
1030.000000
1030.000000
1030.000000
1030.000000
1030.000000
1030.000000
1030.000000
1030.000000
1030.000000
1030.000000
1030.000000
1030.000000
1030.000000
1030.000000
1030.000000
1030.000000
1030.000000
1030.000000
1030.000000
1030.000000
1030.000000
1030.000000
1030.000000
1030.000000
1030.000000
1030.000000
1030.000000
1030.000000
1030.000000
1030.000000
1030.000000
1030.000000
1030.000000
1030.000000
1030.000000
1030.000000
1030.000000
1030.000000
1030.000000
1030.000000
1030.000000
1030.000000
1030.000000
1030.000000
1030.000000
1030.000000
1030.000000
1030.000000
1030.000000
1030.000000
1030.000000
1030.000000
1030.000000
1030.000000
1030.000000
1030.000000
1030.000000
1030.000000
1030.000000
1030.000000
1030.000000
1030.000000
1030.000000
1030.000000
1030.000000
1030.000000
1030.000000
1030.000000
1030.000000
1030.000000
1030.000000
1030.000000
1030.000000
1030.000000
1030.000000
1030.000000
1030.000000
1030.000000
1030.000000
1030.000000
1030.000000
1030.000000
1030.000000
1030.000000
1030.000000
1030.000000
1030.000000
1030.000000
1030.000000
1030.000000
1030.000000
1030.000000
1030.000000
1030.000000
1030.000000
1030.000000
1030.000000
1030.000000
1030.000000
1030.000000
1030.000000
1030.000000
1030.000000
1030.000000
1030.000000
1030.000000
1030.000000
1030.000000
1030.000000
1030.000000
1030.000000
1030.000000
1030.000000
1030.000000
1030.000000
1030.000000
1030.000000
1030.000000
1030.000000
1030.000000
1030.000000
1030.000000
1030.000000
1030.000000
1030.000000
1030.000000
1030.000000
1030.000000
1030.000000
1030.000000
1030.000000
1030.000000
1030.000000
1030.000000
1030.000000
1030.000000
1030.000000
1030.000000
1030.000000
1030.000000
1030.000000
1030.000000
1030.000000
1030.000000
1030.000000
1030.000000
1030.000000
1030.000000
1030.000000
1030.000000
1030.000000
1030.000000
1030.000000
1030.000000
1030.000000
1030.000000
1030.000000
1030.000000
1030.000000
1030.000000
1030.000000
1030.000000
1030.000000
1030.000000
1030.000000
1030.000000
1030.000000
1030.000000
1030.000000
1030.000000
1030.000000
1030.000000
1030.000000
1030.000000
1030.000000
1030.000000
1030.000000
1030.000000
1030.000000
1030.000000
1030.000000
1030.000000
1030.000000
1030.000000
1030.000000
1030.000000
1030.000000
1030.000000
1030.000000
1030.000000
1030.000000
1030.000000
1030.000000
1030.000000
1030.000000
1030.000000
1030.000000
1030.000000
1030.000000
1030.000000
1030.000000
1030.000000
1030.000000
1030.000000
1030.000000
1030.000000
1030.000000
1030.000000
1030.000000
1030.000000
1030.000000
1030.000000
1030.000000
1030.000000
1030.000000
1030.000000
1030.000000
1030.000000
1030.000000
1030.000000
1030.000000
1030.000000
1030.000000
1030.000000
1030.000000
1030.000000
1030.000000
1030.000000
1030.000000
1030.000000
1030.000000
1030.000000
1030.000000
1030.000000
1030.000000
1030.000000
1030.000000
1030.000000
1030.000000
1030.000000
1030.000000
1030.000000
1030.000000
1030.000000
1030.000000
1030.000000
1030.000000
1030.000000
1030.000000
1030.000000
1030.000000
1030.000000
1030.000000
1030.000000
1030.000000
1030.000000
1030.000000
1030.000000
1030.000000
1030.000000
1030.000000
1030.000000
1030.000000
1030.000000
1030.000000
1030.000000
1030.000000
1030.000000
1030.000000
1030.000000
1030.000000
1030.000000
1030.000000
1030.000000
1030.000000
1030.000000
1030.000000
1030.000000
1030.000000
1030.000000
1030.000000
1030.000000
1030.000000
1030.000000
1030.000000
1030.000000
1030.000000
1030.000000
1030.000000
1030.000000
1030.000000
1030.000000
1030.000000
1030.000000
1030.000000
1030.000000
1030.000000
1030.000000
1030.000000
1030.000000
1030.000000
1030.000000
1030.000000
1030.000000
1030.000000
1030.000000
1030.000000
1030.000000
1030.000000
1030.000000
1030.000000
1030.000000
1030.000000
1030.000000
1030.000000
1030.000000
1030.000000
1030.000000
1030.000000
1030.000000
1030.000000
1030.000000
1030.000000
1030.000000
1030.000000
1030.000000
1030.000000
1030.000000
1030.000000
1030.000000
1030.000000
1030.000000
1030.000000
1030.000000
1030.000000
1030.000000
1030.000000
1030.000000
1030.000000
1030.000000
1030.000000
1030.000000
1030.000000
1030.000000
1030.000000
1030.000000
1030.000000
1030.000000
1030.000000
1030.000000
1030.000000
1030.000000
1030.000000
1030.000000
1030.000000
1030.000000
1030.000000
1030.000000
1030.000000
1030.000000
1030.000000
1030.000000
1030.000000
1030.000000
1030.000000
1030.000000
1030.000000
1030.000000
1030.000000
1030.000000
1030.000000
1030.000000
1030.000000
1030.000000
1030.000000
1030.000000
1030.000000
1030.000000
1030.000000
1030.000000
1030.000000
1030.000000
1030.000000
1030.000000
1030.000000
1030.000000
1030.000000
1030.000000
1030.000000
1030.000000
1030.000000
1030.000000
1030.000000
1030.000000
1030.000000
1030.000000
1030.000000
1030.000000
1030.000000
1030.000000
1030.000000
1030.000000
1030.000000
1030.000000
1030.000000
1030.000000
1030.000000
1030.000000
1030.000000
1030.000000
1030.000000
1030.000000
1030.000000
1030.000000
1030.000000
1030.000000
1030.000000
1030.000000
1030.000000
1030.000000
1030.000000
1030.000000
1030.000000
1030.000000
1030.000000
1030.000000
1030.000000
1030.000000
1030.000000
1030.000000
1030.000000
1030.000000
1030.000000
1030.000000
1030.000000
1030.000000
1030.000000
1030.000000
1030.000000
1030.000000
1030.000000
1030.000000
1030.000000
1030.000000
1030.000000
1030.000000
1030.000000
1030.000000
1030.000000
1030.000000
1030.000000
1030.000000
1030.000000
1030.000000
1030.000000
1030.000000
1030.000000
1030.000000
1030.000000
1030.000000
1030.000000
1030.000000
1030.000000
1030.000000
1030.000000
1030.000000
1030.000000
1030.000000
1030.000000
1030.000000
1030.000000
1030.000000
1030.000000
1030.000000
1030.000000
1030.000000
1030.000000
1030.000000
1030.000000
1030.000000
1030.000000
1030.000000
1030.000000
1030.000000
1030.000000
1030.000000
1030.000000
1030.000000
1030.000000
1030.000000
1030.000000
1030.000000
1030.000000
1030.000000
1030.000000
1030.000000
1030.000000
1030.000000
1030.000000
1030.000000
1030.000000
1030.000000
1030.000000
1030.000000
1030.000000
1030.000000
1030.000000
1030.000000
1030.000000
1030.000000
1030.000000
1030.000000
1030.000000
1030.000000
1030.000000
1030.000000
1030.000000
1030.000000
1030.000000
1030.000000
1030.000000
1030.000000
1030.000000
1030.000000
1030.000000
1030.000000
1030.000000
1030.000000
1030.000000
1030.000000
1030.000000
1030.000000
1030.000000
1030.000000
1030.000000
1030.000000
1030.000000
1030.000000
1030.000000
1030.000000
1030.000000
1030.000000
1030.000000
1030.000000
1030.000000
1030.000000
1030.000000
1030.000000
1030.000000
1030.000000
1030.000000
1030.000000
1030.000000
1030.000000
1030.000000
1030.000000
1030.000000
1030.000000
1030.000000
1030.000000
1030.000000
1030.000000
1030.000000
1030.000000
1030.000000
1030.000000
1030.000000
1030.000000
1030.000000
1030.000000
1030.000000
1030.000000
1030.000000
1030.000000
1030.000000
1030.000000
1030.000000
1030.000000
1030.000000
1030.000000
1030.000000
1030.000000
1030.000000
1030.000000
1030.000000
1030.000000
1030.000000
1030.000000
1030.000000
1030.000000
1030.000000
1030.000000
1030.000000
1030.000000
1030.000000
1030.000000
1030.000000
1030.000000
1030.000000
1030.000000
1030.000000
1030.000000
1030.000000
1030.000000
1030.000000
1030.000000
1030.000000
1030.000000
1030.000000
1030.000000
1030.000000
1030.000000
1030.000000
1030.000000
1030.000000
1030.000000
1030.000000
1030.000000
1030.000000
1030.000000
1030.000000
1030.000000
1030.000000
1030.000000
1030.000000
1030.000000
1030.000000
1030.000000
1030.000000
1030.000000
1030.000000
1030.000000
1030.000000
1030.000000
1030.000000
1030.000000
1030.000000
1030.000000
1030.000000
1030.000000
1030.000000
1030.000000
1030.000000
1030.000000
1030.000000
1030.000000
1030.000000
1030.000000
1030.000000
1030.000000
1030.000000
1030.000000
1030.000000
1030.000000
1030.000000
1030.000000
1030.000000
1030.000000
1030.000000
1030.000000
1030.000000
1030.000000
1030.000000
1030.000000
1030.000000
1030.000000
1030.000000
1030.000000
1030.000000
1030.000000
1030.000000
1030.000000
1030.000000
1030.000000
1030.000000
1030.000000
1030.000000
1030.000000
1030.000000
1030.000000
1030.000000
1030.000000
1030.000000
1030.000000
1030.000000
1030.000000
1030.000000
1030.000000
1030.000000
1030.000000
1030.000000
1030.000000
1030.000000
1030.000000
1030.000000
1030.000000
1030.000000
1030.000000
1030.000000
1030.000000
1030.000000
1030.000000
1030.000000
1030.000000
1030.000000
1030.000000
1030.000000
1030.000000
1030.000000
1030.000000
1030.000000
1030.000000
1030.000000
1030.000000
1030.000000
1030.000000
1030.000000
1030.000000
1030.000000
1030.000000
1030.000000
1030.000000
1030.000000
1030.000000
1030.000000
1030.000000
1030.000000
1030.000000
1030.000000
1030.000000
1030.000000
1030.000000
1030.000000
1030.000000
1030.000000
1030.000000
1030.000000
1030.000000
1030.000000
1030.000000
1030.000000
1030.000000
1030.000000
1030.000000
1030.000000
1030.000000
1030.000000
1030.000000
1030.000000
1030.000000
1030.000000
1030.000000
1030.000000
1030.000000
1030.000000
1030.000000
1030.000000
1030.000000
1030.000000
1030.000000
1030.000000
1030.000000
1030.000000
1030.000000
1030.000000
1030.000000
1030.000000
1030.000000
1030.000000
1030.000000
1030.000000
1030.000000
1030.000000
1030.000000
1030.000000
1030.000000
1030.000000
1030.000000
1030.000000
1030.000000
1030.000000
1030.000000
1030.000000
1030.000000
1030.000000
1030.000000
1030.000000
1030.000000
1030.000000
1030.000000
1030.000000
1030.000000
1030.000000
1030.000000
1030.000000
1030.000000
1030.000000
1030.000000
1030.000000
1030.000000
1030.000000
1030.000000
1030.000000
1030.000000
1030.000000
1030.000000
1030.000000
1030.000000
1030.000000
1030.000000
1030.000000
1030.000000
1030.000000
1030.000000
1030.000000
1030.000000
1030.000000
1030.000000
1030.000000
1030.000000
1030.000000
1030.000000
1030.000000
1030.000000
1030.000000
1030.000000
1030.000000
1030.000000
1030.000000
1030.000000
1030.000000
1030.000000
1030.000000
1030.000000
1030.000000
1030.000000
1030.000000
1030.000000
1030.000000
1030.000000
1030.000000
1030.000000
1030.000000
1030.000000
1030.000000
1030.000000
1030.000000
1030.000000
1030.000000
1030.000000
1030.000000
1030.000000
1030.000000
1030.000000
1030.000000
1030.000000
1030.000000
1030.000000
1030.000000
1030.000000
1030.000000
1030.000000
1030.000000
1030.000000
1030.000000
1030.000000
1030.000000
1030.000000
1030.000000
1030.000000
1030.000000
1030.000000
1030.000000
1030.000000
1030.000000
1030.000000
1030.000000
1030.000000
1030.000000
1030.000000
1030.000000
1030.000000
1030.000000
1030.000000
1030.000000
1030.000000
1030.000000
1030.000000
1030.000000
1030.000000
1030.000000
1030.000000
1030.000000
1030.000000
1030.000000
1030.000000
1030.000000
1030.000000
1030.000000
1030.000000
1030.000000
1030.000000
1030.000000
1030.000000
1030.000000
1030.000000
1030.000000
1030.000000
1030.000000
1030.000000
1030.000000
1030.000000
1030.000000
1030.000000
1030.000000
1030.000000
1030.000000
1030.000000
1030.000000
1030.000000
1030.000000
1030.000000
1030.000000
1030.000000
1030.000000
1030.000000
1030.000000
1030.000000
1030.000000
1030.000000
1030.000000
1030.000000
1030.000000
1030.000000
1030.000000
1030.000000
1030.000000
1030.000000
1030.000000
1030.000000
1030.000000
1030.000000
1030.000000
1030.000000
1030.000000
1030.000000
1030.000000
1030.000000
1030.000000
1030.000000
1030.000000
1030.000000
1030.000000
1030.000000
1030.000000
1030.000000
1030.000000
1030.000000
1030.000000
1030.000000
1030.000000
1030.000000
1030.000000
1030.000000
1030.000000
1030.000000
1030.000000
1030.000000
1030.000000
1030.000000
1030.000000
1030.000000
1030.000000
1030.000000
1030.000000
1030.000000
1030.000000
1030.000000
1030.000000
1030.000000
1030.000000
1030.000000
1030.000000
1030.000000
1030.000000
1030.000000
1030.000000
1030.000000
1030.000000
1030.000000
1030.000000
1030.000000
1030.000000
1030.000000
1030.000000
1030.000000
1030.000000
1030.000000
1030.000000
1030.000000
1030.000000
1030.000000
1030.000000
1030.000000
1030.000000
1030.000000
1030.000000
1030.000000
1030.000000
1030.000000
1030.000000
1030.000000
1030.000000
1030.000000
1030.000000
1030.000000
1030.000000
1030.000000
1030.000000
1030.000000
1030.000000
1030.000000
1030.000000
1030.000000
1030.000000
1030.000000
1030.000000
1030.000000
1030.000000
1030.000000
1030.000000
1030.000000
1030.000000
1030.000000
1030.000000
1030.000000
1030.000000
1030.000000
1030.000000
1030.000000
1030.000000
1030.000000
1030.000000
1030.000000
1030.000000
1030.000000
1030.000000
1030.000000
1030.000000
1030.000000
1030.000000
1030.000000
1030.000000
1030.000000
1030.000000
1030.000000
1030.000000
1030.000000
1030.000000
1030.000000
1030.000000
1030.000000
1030.000000
1030.000000
1030.000000
1030.000000
1030.000000
1030.000000
1030.000000
1030.000000
1030.000000
1030.000000
1030.000000
1030.000000
1030.000000
1030.000000
1030.000000
1030.000000
1030.000000
1030.000000
1030.000000
1030.000000
1030.000000
1030.000000
1030.000000
1030.000000
1030.000000
1030.000000
1030.000000
1030.000000
1030.000000
1030.000000
1030.000000
1030.000000
1030.000000
1030.000000
1030.000000
1030.000000
1030.000000
1030.000000
1030.000000
1030.000000
1030.000000
1030.000000
1030.000000
1030.000000
1030.000000
1030.000000
1030.000000
1030.000000
1030.000000
1030.000000
1030.000000
1030.000000
1030.000000
1030.000000
1030.000000
1030.000000
1030.000000
1030.000000
1030.000000
1030.000000
1030.000000
1030.000000
1030.000000
1030.000000
1030.000000
1030.000000
1030.000000
1030.000000
1030.000000
1030.000000
1030.000000
1030.000000
1030.000000
1030.000000
1030.000000
1030.000000
1030.000000
1030.000000
1030.000000
1030.000000
1030.000000
1030.000000
1030.000000
1030.000000
1030.000000
1030.000000
1030.000000
1030.000000
1030.000000
1030.000000
1030.000000
1030.000000
1030.000000
1030.000000
1030.000000
1030.000000
1030.000000
1030.000000
1030.000000
1030.000000
1030.000000
1030.000000
1030.000000
1030.000000
1030.000000
1030.000000
1030.000000
1030.000000
1030.000000
1030.000000
1030.000000
1030.000000
1030.000000
1030.000000
1030.000000
1030.000000
1030.000000
1030.000000
1030.000000
1030.000000
1030.000000
1030.000000
1030.000000
1030.000000
1030.000000
1030.000000
1030.000000
1030.000000
1030.000000
1030.000000
1030.000000
1030.000000
1030.000000
1030.000000
1030.000000
1030.000000
1030.000000
1030.000000
1030.000000
1030.000000
1030.000000
1030.000000
1030.000000
1030.000000
1030.000000
1030.000000
1030.000000
1030.000000
1030.000000
1030.000000
1030.000000
1030.000000
1030.000000
1030.000000
1030.000000
1030.000000
1030.000000
1030.000000
1030.000000
1030.000000
1030.000000
1030.000000
1030.000000
1030.000000
1030.000000
1030.000000
1030.000000
1030.000000
1030.000000
1030.000000
1030.000000
1030.000000
1030.000000
1030.000000
1030.000000
1030.000000
1030.000000
1030.000000
1030.000000
1030.000000
1030.000000
1030.000000
1030.000000
1030.000000
1030.000000
1030.000000
1030.000000
1030.000000
1030.000000
1030.000000
1030.000000
1030.000000
1030.000000
1030.000000
1030.000000
1030.000000
1030.000000
1030.000000
1030.000000
1030.000000
1030.000000
1030.000000
1030.000000
1030.000000
1030.000000
1030.000000
1030.000000
1030.000000
1030.000000
1030.000000
1030.000000
1030.000000
1030.000000
1030.000000
1030.000000
1030.000000
1030.000000
1030.000000
1030.000000
1030.000000
1030.000000
1030.000000
1030.000000
1030.000000
1030.000000
1030.000000
1030.000000
1030.000000
1030.000000
1030.000000
1030.000000
1030.000000
1030.000000
1030.000000
1030.000000
1030.000000
1030.000000
1030.000000
1030.000000
1030.000000
1030.000000
1030.000000
1030.000000
1030.000000
1030.000000
1030.000000
1030.000000
1030.000000
1030.000000
1030.000000
1030.000000
1030.000000
1030.000000
1030.000000
1030.000000
1030.000000
1030.000000
1030.000000
1030.000000
1030.000000
1030.000000
1030.000000
1030.000000
1030.000000
1030.000000
1030.000000
1030.000000
1030.000000
1030.000000
1030.000000
1030.000000
1030.000000
1030.000000
1030.000000
1030.000000
1030.000000
1030.000000
1030.000000
1030.000000
1030.000000
1030.000000
1030.000000
1030.000000
1030.000000
1030.000000
1030.000000
1030.000000
1030.000000
1030.000000
1030.000000
1030.000000
1030.000000
1030.000000
1030.000000
1030.000000
1030.000000
1030.000000
1030.000000
1030.000000
1030.000000
1030.000000
1030.000000
1030.000000
1030.000000
1030.000000
1030.000000
1030.000000
1030.000000
1030.000000
1030.000000
1030.000000
1030.000000
1030.000000
1030.000000
1030.000000
1030.000000
1030.000000
1030.000000
1030.000000
1030.000000
1030.000000
1030.000000
1030.000000
1030.000000
1030.000000
1030.000000
1030.000000
1030.000000
1030.000000
1030.000000
1030.000000
1030.000000
1030.000000
1030.000000
1030.000000
1030.000000
1030.000000
1030.000000
1030.000000
1030.000000
1030.000000
1030.000000
1030.000000
1030.000000
1030.000000
1030.000000
1030.000000
1030.000000
1030.000000
1030.000000
1030.000000
1030.000000
1030.000000
1030.000000
1030.000000
1030.000000
1030.000000
1030.000000
1030.000000
1030.000000
1030.000000
1030.000000
1030.000000
1030.000000
1030.000000
1030.000000
1030.000000
1030.000000
1030.000000
1030.000000
1030.000000
1030.000000
1030.000000
1030.000000
1030.000000
1030.000000
1030.000000
1030.000000
1030.000000
1030.000000
1030.000000
1030.000000
1030.000000
1030.000000
1030.000000
1030.000000
1030.000000
1030.000000
1030.000000
1030.000000
1030.000000
1030.000000
1030.000000
1030.000000
1030.000000
1030.000000
1030.000000
1030.000000
1030.000000
1030.000000
1030.000000
1030.000000
1030.000000
1030.000000
1030.000000
1030.000000
1030.000000
1030.000000
1030.000000
1030.000000
1030.000000
1030.000000
1030.000000
1030.000000
1030.000000
1030.000000
1030.000000
1030.000000
1030.000000
1030.000000
1030.000000
1030.000000
1030.000000
1030.000000
1030.000000
1030.000000
1030.000000
1030.000000
1030.000000
1030.000000
1030.000000
1030.000000
1030.000000
1030.000000
1030.000000
1030.000000
1030.000000
1030.000000
1030.000000
1030.000000
1030.000000
1030.000000
1030.000000
1030.000000
1030.000000
1030.000000
1030.000000
1030.000000
1030.000000
1030.000000
1030.000000
1030.000000
1030.000000
1030.000000
1030.000000
1030.000000
1030.000000
1030.000000
1030.000000
1030.000000
1030.000000
1030.000000
1030.000000
1030.000000
1030.000000
1030.000000
1030.000000
1030.000000
1030.000000
1030.000000
1030.000000
1030.000000
1030.000000
1030.000000
1030.000000
1030.000000
1030.000000
1030.000000
1030.000000
1030.000000
1030.000000
1030.000000
1030.000000
1030.000000
1030.000000
1030.000000
1030.000000
1030.000000
1030.000000
1030.000000
1030.000000
1030.000000
1030.000000
1030.000000
1030.000000
1030.000000
1030.000000
1030.000000
1030.000000
1030.000000
1030.000000
1030.000000
1030.000000
1030.000000
1030.000000
1030.000000
1030.000000
1030.000000
1030.000000
1030.000000
1030.000000
1030.000000
1030.000000
1030.000000
1030.000000
1030.000000
1030.000000
1030.000000
1030.000000
1030.000000
1030.000000
1030.000000
1030.000000
1030.000000
1030.000000
1030.000000
1030.000000
1030.000000
1030.000000
1030.000000
1030.000000
1030.000000
1030.000000
1030.000000
1030.000000
1030.000000
1030.000000
1030.000000
1030.000000
1030.000000
1030.000000
1030.000000
1030.000000
1030.000000
1030.000000
1030.000000
1030.000000
1030.000000
1030.000000
1030.000000
1030.000000
1030.000000
1030.000000
1030.000000
1030.000000
1030.000000
1030.000000
1030.000000
1030.000000
1030.000000
1030.000000
1030.000000
1030.000000
1030.000000
1030.000000
1030.000000
1030.000000
1030.000000
1030.000000
1030.000000
1030.000000
1030.000000
1030.000000
1030.000000
1030.000000
1030.000000
1030.000000
1030.000000
1030.000000
1030.000000
1030.000000
1030.000000
1030.000000
1030.000000
1030.000000
1030.000000
1030.000000
1030.000000
1030.000000
1030.000000
1030.000000
1030.000000
1030.000000
1030.000000
1030.000000
1030.000000
1030.000000
1030.000000
1030.000000
1030.000000
1030.000000
1030.000000
1030.000000
1030.000000
1030.000000
1030.000000
1030.000000
1030.000000
1030.000000
1030.000000
1030.000000
1030.000000
1030.000000
1030.000000
1030.000000
1030.000000
1030.000000
1030.000000
1030.000000
1030.000000
1030.000000
1030.000000
1030.000000
1030.000000
1030.000000
1030.000000
1030.000000
1030.000000
1030.000000
1030.000000
1030.000000
1030.000000
1030.000000
1030.000000
1030.000000
1030.000000
1030.000000
1030.000000
1030.000000
1030.000000
1030.000000
1030.000000
1030.000000
1030.000000
1030.000000
1030.000000
1030.000000
1030.000000
1030.000000
1030.000000
1030.000000
1030.000000
1030.000000
1030.000000
1030.000000
1030.000000
1030.000000
1030.000000
1030.000000
1030.000000
1030.000000
1030.000000
1030.000000
1030.000000
1030.000000
1030.000000
1030.000000
1030.000000
1030.000000
1030.000000
1030.000000
1030.000000
1030.000000
1030.000000
1030.000000
1030.000000
1030.000000
1030.000000
1030.000000
1030.000000
1030.000000
1030.000000
1030.000000
1030.000000
1030.000000
1030.000000
1030.000000
1030.000000
1030.000000
1030.000000
1030.000000
1030.000000
1030.000000
1030.000000
1030.000000
1030.000000
1030.000000
1030.000000
1030.000000
1030.000000
1030.000000
1030.000000
1030.000000
1030.000000
1030.000000
1030.000000
1030.000000
1030.000000
1030.000000
1030.000000
1030.000000
1030.000000
1030.000000
1030.000000
1030.000000
1030.000000
1030.000000
1030.000000
1030.000000
1030.000000
1030.000000
1030.000000
1030.000000
1030.000000
1030.000000
1030.000000
1030.000000
1030.000000
1030.000000
1030.000000
1030.000000
1030.000000
1030.000000
1030.000000
1030.000000
1030.000000
1030.000000
1030.000000
1030.000000
1030.000000
1030.000000
1030.000000
1030.000000
1030.000000
1030.000000
1030.000000
1030.000000
1030.000000
1030.000000
1030.000000
1030.000000
1030.000000
1030.000000
1030.000000
1030.000000
1030.000000
1030.000000
1030.000000
1030.000000
1030.000000
1030.000000
1030.000000
1030.000000
1030.000000
1030.000000
1030.000000
1030.000000
1030.000000
1030.000000
1030.000000
1030.000000
1030.000000
1030.000000
1030.000000
1030.000000
1030.000000
1030.000000
1030.000000
1030.000000
1030.000000
1030.000000
1030.000000
1030.000000
1030.000000
1030.000000
1030.000000
1030.000000
1030.000000
1030.000000
1030.000000
1030.000000
1030.000000
1030.000000
1030.000000
1030.000000
1030.000000
1030.000000
1030.000000
1030.000000
1030.000000
1030.000000
1030.000000
1030.000000
1030.000000
1030.000000
1030.000000
1030.000000
1030.000000
1030.000000
1030.000000
1030.000000
1030.000000
1030.000000
1030.000000
1030.000000
1030.000000
1030.000000
1030.000000
1030.000000
1030.000000
1030.000000
1030.000000
1030.000000
1030.000000
1030.000000
1030.000000
1030.000000
1030.000000
1030.000000
1030.000000
1030.000000
1030.000000
1030.000000
1030.000000
1030.000000
1030.000000
1030.000000
1030.000000
1030.000000
1030.000000
1030.000000
1030.000000
1030.000000
1030.000000
1030.000000
1030.000000
1030.000000
1030.000000
1030.000000
1030.000000
1030.000000
1030.000000
1030.000000
1030.000000
1030.000000
1030.000000
1030.000000
1030.000000
1030.000000
1030.000000
1030.000000
1030.000000
1030.000000
1030.000000
1030.000000
1030.000000
1030.000000
1030.000000
1030.000000
1030.000000
1030.000000
1030.000000
1030.000000
1030.000000
1030.000000
1030.000000
1030.000000
1030.000000
1030.000000
1030.000000
1030.000000
1030.000000
1030.000000
1030.000000
1030.000000
1030.000000
1030.000000
1030.000000
1030.000000
1030.000000
1030.000000
1030.000000
1030.000000
1030.000000
1030.000000
1030.000000
1030.000000
1030.000000
1030.000000
1030.000000
1030.000000
1030.000000
1030.000000
1030.000000
1030.000000
1030.000000
1030.000000
1030.000000
1030.000000
1030.000000
1030.000000
1030.000000
1030.000000
1030.000000
1030.000000
1030.000000
1030.000000
1030.000000
1030.000000
1030.000000
1030.000000
1030.000000
1030.000000
1030.000000
1030.000000
1030.000000
1030.000000
1030.000000
1030.000000
1030.000000
1030.000000
1030.000000
1030.000000
1030.000000
1030.000000
1030.000000
1030.000000
1030.000000
1030.000000
1030.000000
1030.000000
1030.000000
1030.000000
1030.000000
1030.000000
1030.000000
1030.000000
1030.000000
1030.000000
1030.000000
1030.000000
1030.000000
1030.000000
1030.000000
1030.000000
1030.000000
1030.000000
1030.000000
1030.000000
1030.000000
1030.000000
1030.000000
1030.000000
1030.000000
1030.000000
1030.000000
1030.000000
1030.000000
1030.000000
1030.000000
1030.000000
1030.000000
1030.000000
1030.000000
1030.000000
1030.000000
1030.000000
1030.000000
1030.000000
1030.000000
1030.000000
1030.000000
1030.000000
1030.000000
1030.000000
1030.000000
1030.000000
1030.000000
1030.000000
1030.000000
1030.000000
1030.000000
1030.000000
1030.000000
1030.000000
1030.000000
1030.000000
1030.000000
1030.000000
1030.000000
1030.000000
1030.000000
1030.000000
1030.000000
1030.000000
1030.000000
1030.000000
1030.000000
1030.000000
1030.000000
1030.000000
1030.000000
1030.000000
1030.000000
1030.000000
1030.000000
1030.000000
1030.000000
1030.000000
1030.000000
1030.000000
1030.000000
1030.000000
1030.000000
1030.000000
1030.000000
1030.000000
1030.000000
1030.000000
1030.000000
1030.000000
1030.000000
1030.000000
1030.000000
1030.000000
1030.000000
1030.000000
1030.000000
1030.000000
1030.000000
1030.000000
1030.000000
1030.000000
1030.000000
1030.000000
1030.000000
1030.000000
1030.000000
1030.000000
1030.000000
1030.000000
1030.000000
1030.000000
1030.000000
1030.000000
1030.000000
1030.000000
1030.000000
1030.000000
1030.000000
1030.000000
1030.000000
1030.000000
1030.000000
1030.000000
1030.000000
1030.000000
1030.000000
1030.000000
1030.000000
1030.000000
1030.000000
1030.000000
1030.000000
1030.000000
1030.000000
1030.000000
1030.000000
1030.000000
1030.000000
1030.000000
1030.000000
1030.000000
1030.000000
1030.000000
1030.000000
1030.000000
1030.000000
1030.000000
1030.000000
1030.000000
1030.000000
1030.000000
1030.000000
1030.000000
1030.000000
1030.000000
1030.000000
1030.000000
1030.000000
1030.000000
1030.000000
1030.000000
1030.000000
1030.000000
1030.000000
1030.000000
1030.000000
1030.000000
1030.000000
1030.000000
1030.000000
1030.000000
1030.000000
1030.000000
1030.000000
1030.000000
1030.000000
1030.000000
1030.000000
1030.000000
1030.000000
1030.000000
1030.000000
1030.000000
1030.000000
1030.000000
1030.000000
1030.000000
1030.000000
1030.000000
1030.000000
1030.000000
1030.000000
1030.000000
1030.000000
1030.000000
1030.000000
1030.000000
1030.000000
1030.000000
1030.000000
1030.000000
1030.000000
1030.000000
1030.000000
1030.000000
1030.000000
1030.000000
1030.000000
1030.000000
1030.000000
1030.000000
1030.000000
1030.000000
1030.000000
1030.000000
1030.000000
1030.000000
1030.000000
1030.000000
1030.000000
1030.000000
1030.000000
1030.000000
1030.000000
1030.000000
1030.000000
1030.000000
1030.000000
1030.000000
1030.000000
1030.000000
1030.000000
1030.000000
1030.000000
1030.000000
1030.000000
1030.000000
1030.000000
1030.000000
1030.000000
1030.000000
1030.000000
1030.000000
1030.000000
1030.000000
1030.000000
1030.000000
1030.000000
1030.000000
1030.000000
1030.000000
1030.000000
1030.000000
1030.000000
1030.000000
1030.000000
1030.000000
1030.000000
1030.000000
1030.000000
1030.000000
1030.000000
1030.000000
1030.000000
1030.000000
1030.000000
1030.000000
1030.000000
1030.000000
1030.000000
1030.000000
1030.000000
1030.000000
1030.000000
1030.000000
1030.000000
1030.000000
1030.000000
1030.000000
1030.000000
1030.000000
1030.000000
1030.000000
1030.000000
1030.000000
1030.000000
1030.000000
1030.000000
1030.000000
1030.000000
1030.000000
1030.000000
1030.000000
1030.000000
1030.000000
1030.000000
1030.000000
1030.000000
1030.000000
1030.000000
1030.000000
1030.000000
1030.000000
1030.000000
1030.000000
1030.000000
1030.000000
1030.000000
1030.000000
1030.000000
1030.000000
1030.000000
1030.000000
1030.000000
1030.000000
1030.000000
1030.000000
1030.000000
1030.000000
1030.000000
1030.000000
1030.000000
1030.000000
1030.000000
1030.000000
1030.000000
1030.000000
1030.000000
1030.000000
1030.000000
1030.000000
1030.000000
1030.000000
1030.000000
1030.000000
1030.000000
1030.000000
1030.000000
1030.000000
1030.000000
1030.000000
1030.000000
1030.000000
1030.000000
1030.000000
1030.000000
1030.000000
1030.000000
1030.000000
1030.000000
1030.000000
1030.000000
1030.000000
1030.000000
1030.000000
1030.000000
1030.000000
1030.000000
1030.000000
1030.000000
1030.000000
1030.000000
1030.000000
1030.000000
1030.000000
1030.000000
1030.000000
1030.000000
1030.000000
1030.000000
1030.000000
1030.000000
1030.000000
1030.000000
1030.000000
1030.000000
1030.000000
1030.000000
1030.000000
1030.000000
1030.000000
1030.000000
1030.000000
1030.000000
1030.000000
1030.000000
1030.000000
1030.000000
1030.000000
1030.000000
1030.000000
1030.000000
1030.000000
1030.000000
1030.000000
1030.000000
1030.000000
1030.000000
1030.000000
1030.000000
1030.000000
1030.000000
1030.000000
1030.000000
1030.000000
1030.000000
1030.000000
1030.000000
1030.000000
1030.000000
1030.000000
1030.000000
1030.000000
1030.000000
1030.000000
1030.000000
1030.000000
1030.000000
1030.000000
1030.000000
1030.000000
1030.000000
1030.000000
1030.000000
1030.000000
1030.000000
1030.000000
1030.000000
1030.000000
1030.000000
1030.000000
1030.000000
1030.000000
1030.000000
1030.000000
1030.000000
1030.000000
1030.000000
1030.000000
1030.000000
1030.000000
1030.000000
1030.000000
1030.000000
1030.000000
1030.000000
1030.000000
1030.000000
1030.000000
1030.000000
1030.000000
1030.000000
1030.000000
1030.000000
1030.000000
1030.000000
1030.000000
1030.000000
1030.000000
1030.000000
1030.000000
1030.000000
1030.000000
1030.000000
1030.000000
1030.000000
1030.000000
1030.000000
1030.000000
1030.000000
1030.000000
1030.000000
1030.000000
1030.000000
1030.000000
1030.000000
1030.000000
1030.000000
1030.000000
1030.000000
1030.000000
1030.000000
1030.000000
1030.000000
1030.000000
1030.000000
1030.000000
1030.000000
1030.000000
1030.000000
1030.000000
1030.000000
1030.000000
1030.000000
1030.000000
1030.000000
1030.000000
1030.000000
1030.000000
1030.000000
1030.000000
1030.000000
1030.000000
1030.000000
1030.000000
1030.000000
1030.000000
1030.000000
1030.000000
1030.000000
1030.000000
1030.000000
1030.000000
1030.000000
1030.000000
1030.000000
1030.000000
1030.000000
1030.000000
1030.000000
1030.000000
1030.000000
1030.000000
1030.000000
1030.000000
1030.000000
1030.000000
1030.000000
1030.000000
1030.000000
1030.000000
1030.000000
1030.000000
1030.000000
1030.000000
1030.000000
1030.000000
1030.000000
1030.000000
1030.000000
1030.000000
1030.000000
1030.000000
1030.000000
1030.000000
1030.000000
1030.000000
1030.000000
1030.000000
1030.000000
1030.000000
1030.000000
1030.000000
1030.000000
1030.000000
1030.000000
1030.000000
1030.000000
1030.000000
1030.000000
1030.000000
1030.000000
1030.000000
1030.000000
1030.000000
1030.000000
1030.000000
1030.000000
1030.000000
1030.000000
1030.000000
1030.000000
1030.000000
1030.000000
1030.000000
1030.000000
1030.000000
1030.000000
1030.000000
1030.000000
1030.000000
1030.000000
1030.000000
1030.000000
1030.000000
1030.000000
1030.000000
1030.000000
1030.000000
1030.000000
1030.000000
1030.000000
1030.000000
1030.000000
1030.000000
1030.000000
1030.000000
1030.000000
1030.000000
1030.000000
1030.000000
1030.000000
1030.000000
1030.000000
1030.000000
1030.000000
1030.000000
1030.000000
1030.000000
1030.000000
1030.000000
1030.000000
1030.000000
1030.000000
1030.000000
1030.000000
1030.000000
1030.000000
1030.000000
1030.000000
1030.000000
1030.000000
1030.000000
1030.000000
1030.000000
1030.000000
1030.000000
1030.000000
1030.000000
1030.000000
1030.000000
1030.000000
1030.000000
1030.000000
1030.000000
1030.000000
1030.000000
1030.000000
1030.000000
1030.000000
1030.000000
1030.000000
1030.000000
1030.000000
1030.000000
1030.000000
1030.000000
1030.000000
1030.000000
1030.000000
1030.000000
1030.000000
1030.000000
1030.000000
1030.000000
1030.000000
1030.000000
1030.000000
1030.000000
1030.000000
1030.000000
1030.000000
1030.000000
1030.000000
1030.000000
1030.000000
1030.000000
1030.000000
1030.000000
1030.000000
1030.000000
1030.000000
1030.000000
1030.000000
1030.000000
1030.000000
1030.000000
1030.000000
1030.000000
1030.000000
1030.000000
1030.000000
1030.000000
1030.000000
1030.000000
1030.000000
1030.000000
1030.000000
1030.000000
1030.000000
1030.000000
1030.000000
1030.000000
1030.000000
1030.000000
1030.000000
1030.000000
1030.000000
1030.000000
1030.000000
1030.000000
1030.000000
1030.000000
1030.000000
1030.000000
1030.000000
1030.000000
1030.000000
1030.000000
1030.000000
1030.000000
1030.000000
1030.000000
1030.000000
1030.000000
1030.000000
1030.000000
1030.000000
1030.000000
1030.000000
1030.000000
1030.000000
1030.000000
1030.000000
1030.000000
1030.000000
1030.000000
1030.000000
1030.000000
1030.000000
1030.000000
1030.000000
1030.000000
1030.000000
1030.000000
1030.000000
1030.000000
1030.000000
1030.000000
1030.000000
1030.000000
1030.000000
1030.000000
1030.000000
1030.000000
1030.000000
1030.000000
1030.000000
1030.000000
1030.000000
1030.000000
1030.000000
1030.000000
1030.000000
1030.000000
1030.000000
1030.000000
1030.000000
1030.000000
1030.000000
1030.000000
1030.000000
1030.000000
1030.000000
1030.000000
1030.000000
1030.000000
1030.000000
1030.000000
1030.000000
1030.000000
1030.000000
1030.000000
1030.000000
1030.000000
1030.000000
1030.000000
1030.000000
1030.000000
1030.000000
1030.000000
1030.000000
1030.000000
1030.000000
1030.000000
1030.000000
1030.000000
1030.000000
1030.000000
1030.000000
1030.000000
1030.000000
1030.000000
1030.000000
1030.000000
1030.000000
1030.000000
1030.000000
1030.000000
1030.000000
1030.000000
1030.000000
1030.000000
1030.000000
1030.000000
1030.000000
1030.000000
1030.000000
1030.000000
1030.000000
1030.000000
1030.000000
1030.000000
1030.000000
1030.000000
1030.000000
1030.000000
1030.000000
1030.000000
1030.000000
1030.000000
1030.000000
1030.000000
1030.000000
1030.000000
1030.000000
1030.000000
1030.000000
1030.000000
1030.000000
1030.000000
1030.000000
1030.000000
1030.000000
1030.000000
1030.000000
1030.000000
1030.000000
1030.000000
1030.000000
1030.000000
1030.000000
1030.000000
1030.000000
1030.000000
1030.000000
1030.000000
1030.000000
1030.000000
1030.000000
1030.000000
1030.000000
1030.000000
1030.000000
1030.000000
1030.000000
1030.000000
1030.000000
1030.000000
1030.000000
1030.000000
1030.000000
1030.000000
1030.000000
1030.000000
1030.000000
1030.000000
1030.000000
1030.000000
1030.000000
1030.000000
1030.000000
1030.000000
1030.000000
1030.000000
1030.000000
1030.000000
1030.000000
1030.000000
1030.000000
1030.000000
1030.000000
1030.000000
1030.000000
1030.000000
1030.000000
1030.000000
1030.000000
1030.000000
1030.000000
1030.000000
1030.000000
1030.000000
1030.000000
1030.000000
1030.000000
1030.000000
1030.000000
1030.000000
1030.000000
1030.000000
1030.000000
1030.000000
1030.000000
1030.000000
1030.000000
1030.000000
1030.000000
1030.000000
1030.000000
1030.000000
1030.000000
1030.000000
1030.000000
1030.000000
1030.000000
1030.000000
1030.000000
1030.000000
1030.000000
1030.000000
1030.000000
1030.000000
1030.000000
1030.000000
1030.000000
1030.000000
1030.000000
1030.000000
1030.000000
1030.000000
1030.000000
1030.000000
1030.000000
1030.000000
1030.000000
1030.000000
1030.000000
1030.000000
1030.000000
1030.000000
1030.000000
1030.000000
1030.000000
1030.000000
1030.000000
1030.000000
1030.000000
1030.000000
1030.000000
1030.000000
1030.000000
1030.000000
1030.000000
1030.000000
1030.000000
1030.000000
1030.000000
1030.000000
1030.000000
1030.000000
1030.000000
1030.000000
1030.000000
1030.000000
1030.000000
1030.000000
1030.000000
1030.000000
1030.000000
1030.000000
1030.000000
1030.000000
1030.000000
1030.000000
1030.000000
1030.000000
1030.000000
1030.000000
1030.000000
1030.000000
1030.000000
1030.000000
1030.000000
1030.000000
1030.000000
1030.000000
1030.000000
1030.000000
1030.000000
1030.000000
1030.000000
1030.000000
1030.000000
1030.000000
1030.000000
1030.000000
1030.000000
1030.000000
1030.000000
1030.000000
1030.000000
1030.000000
1030.000000
1030.000000
1030.000000
1030.000000
1030.000000
1030.000000
1030.000000
1030.000000
1030.000000
1030.000000
1030.000000
1030.000000
1030.000000
1030.000000
1030.000000
1030.000000
1030.000000
1030.000000
1030.000000
1030.000000
1030.000000
1030.000000
1030.000000
1030.000000
1030.000000
1030.000000
1030.000000
1030.000000
1030.000000
1030.000000
1030.000000
1030.000000
1030.000000
1030.000000
1030.000000
1030.000000
1030.000000
1030.000000
1030.000000
1030.000000
1030.000000
1030.000000
1030.000000
1030.000000
1030.000000
1030.000000
1030.000000
1030.000000
1030.000000
1030.000000
1030.000000
1030.000000
1030.000000
1030.000000
1030.000000
1030.000000
1030.000000
1030.000000
1030.000000
1030.000000
1030.000000
1030.000000
1030.000000
1030.000000
1030.000000
1030.000000
1030.000000
1030.000000
1030.000000
1030.000000
1030.000000
1030.000000
1030.000000
1030.000000
1030.000000
1030.000000
1030.000000
1030.000000
1030.000000
1030.000000
1030.000000
1030.000000
1030.000000
1030.000000
1030.000000
1030.000000
1030.000000
1030.000000
1030.000000
1030.000000
1030.000000
1030.000000
1030.000000
1030.000000
1030.000000
1030.000000
1030.000000
1030.000000
1030.000000
1030.000000
1030.000000
1030.000000
1030.000000
1030.000000
1030.000000
1030.000000
1030.000000
1030.000000
1030.000000
1030.000000
1030.000000
1030.000000
1030.000000
1030.000000
1030.000000
1030.000000
1030.000000
1030.000000
1030.000000
1030.000000
1030.000000
1030.000000
1030.000000
1030.000000
1030.000000
1030.000000
1030.000000
1030.000000
1030.000000
1030.000000
1030.000000
1030.000000
1030.000000
1030.000000
1030.000000
1030.000000
1030.000000
1030.000000
1030.000000
1030.000000
1030.000000
1030.000000
1030.000000
1030.000000
1030.000000
1030.000000
1030.000000
1030.000000
1030.000000
1030.000000
1030.000000
1030.000000
1030.000000
1030.000000
1030.000000
1030.000000
1030.000000
1030.000000
1030.000000
1030.000000
1030.000000
1030.000000
1030.000000
1030.000000
1030.000000
1030.000000
1030.000000
1030.000000
1030.000000
1030.000000
1030.000000
1030.000000
1030.000000
1030.000000
1030.000000
1030.000000
1030.000000
1030.000000
1030.000000
1030.000000
1030.000000
1030.000000
1030.000000
1030.000000
1030.000000
1030.000000
1030.000000
1030.000000
1030.000000
1030.000000
1030.000000
1030.000000
1030.000000
1030.000000
1030.000000
1030.000000
1030.000000
1030.000000
1030.000000
1030.000000
1030.000000
1030.000000
1030.000000
1030.000000
1030.000000
1030.000000
1030.000000
1030.000000
1030.000000
1030.000000
1030.000000
1030.000000
1030.000000
1030.000000
1030.000000
1030.000000
1030.000000
1030.000000
1030.000000
1030.000000
1030.000000
1030.000000
1030.000000
1030.000000
1030.000000
1030.000000
1030.000000
1030.000000
1030.000000
1030.000000
1030.000000
1030.000000
1030.000000
1030.000000
1030.000000
1030.000000
1030.000000
1030.000000
1030.000000
1030.000000
1030.000000
1030.000000
1030.000000
1030.000000
1030.000000
1030.000000
1030.000000
1030.000000
1030.000000
1030.000000
1030.000000
1030.000000
1030.000000
1030.000000
1030.000000
1030.000000
1030.000000
1030.000000
1030.000000
1030.000000
1030.000000
1030.000000
1030.000000
1030.000000
1030.000000
1030.000000
1030.000000
1030.000000
1030.000000
1030.000000
1030.000000
1030.000000
1030.000000
1030.000000
1030.000000
1030.000000
1030.000000
1030.000000
1030.000000
1030.000000
1030.000000
1030.000000
1030.000000
1030.000000
1030.000000
1030.000000
1030.000000
1030.000000
1030.000000
1030.000000
1030.000000
1030.000000
1030.000000
1030.000000
1030.000000
1030.000000
1030.000000
1030.000000
1030.000000
1030.000000
1030.000000
1030.000000
1030.000000
1030.000000
1030.000000
1030.000000
1030.000000
1030.000000
1030.000000
1030.000000
1030.000000
1030.000000
1030.000000
1030.000000
1030.000000
1030.000000
1030.000000
1030.000000
1030.000000
1030.000000
1030.000000
1030.000000
1030.000000
1030.000000
1030.000000
1030.000000
1030.000000
1030.000000
1030.000000
1030.000000
1030.000000
1030.000000
1030.000000
1030.000000
1030.000000
1030.000000
1030.000000
1030.000000
1030.000000
1030.000000
1030.000000
1030.000000
1030.000000
1030.000000
1030.000000
1030.000000
1030.000000
1030.000000
1030.000000
1030.000000
1030.000000
1030.000000
1030.000000
1030.000000
1030.000000
1030.000000
1030.000000
1030.000000
1030.000000
1030.000000
1030.000000
1030.000000
1030.000000
1030.000000
1030.000000
1030.000000
1030.000000
1030.000000
1030.000000
1030.000000
1030.000000
1030.000000
1030.000000
1030.000000
1030.000000
1030.000000
1030.000000
1030.000000
1030.000000
1030.000000
1030.000000
1030.000000
1030.000000
1030.000000
1030.000000
1030.000000
1030.000000
1030.000000
1030.000000
1030.000000
1030.000000
1030.000000
1030.000000
1030.000000
1030.000000
1030.000000
1030.000000
1030.000000
1030.000000
1030.000000
1030.000000
1030.000000
1030.000000
1030.000000
1030.000000
1030.000000
1030.000000
1030.000000
1030.000000
1030.000000
1030.000000
1030.000000
1030.000000
1030.000000
1030.000000
1030.000000
1030.000000
1030.000000
1030.000000
1030.000000
1030.000000
1030.000000
1030.000000
1030.000000
1030.000000
1030.000000
1030.000000
1030.000000
1030.000000
1030.000000
1030.000000
1030.000000
1030.000000
1030.000000
1030.000000
1030.000000
1030.000000
1030.000000
1030.000000
1030.000000
1030.000000
1030.000000
1030.000000
1030.000000
1030.000000
1030.000000
1030.000000
1030.000000
1030.000000
1030.000000
1030.000000
1030.000000
1030.000000
1030.000000
1030.000000
1030.000000
1030.000000
1030.000000
1030.000000
1030.000000
1030.000000
1030.000000
1030.000000
1030.000000
1030.000000
1030.000000
1030.000000
1030.000000
1030.000000
1030.000000
1030.000000
1030.000000
1030.000000
1030.000000
1030.000000
1030.000000
1030.000000
1030.000000
1030.000000
1030.000000
1030.000000
1030.000000
1030.000000
1030.000000
1030.000000
1030.000000
1030.000000
1030.000000
1030.000000
1030.000000
1030.000000
1030.000000
1030.000000
1030.000000
1030.000000
1030.000000
1030.000000
1030.000000
1030.000000
1030.000000
1030.000000
1030.000000
1030.000000
1030.000000
1030.000000
1030.000000
1030.000000
1030.000000
1030.000000
1030.000000
1030.000000
1030.000000
1030.000000
1030.000000
1030.000000
1030.000000
1030.000000
1030.000000
1030.000000
1030.000000
1030.000000
1030.000000
1030.000000
1030.000000
1030.000000
1030.000000
1030.000000
1030.000000
1030.000000
1030.000000
1030.000000
1030.000000
1030.000000
1030.000000
1030.000000
1030.000000
1030.000000
1030.000000
1030.000000
1030.000000
1030.000000
1030.000000
1030.000000
1030.000000
1030.000000
1030.000000
1030.000000
1030.000000
1030.000000
1030.000000
1030.000000
1030.000000
1030.000000
1030.000000
1030.000000
1030.000000
1030.000000
1030.000000
1030.000000
1030.000000
1030.000000
1030.000000
1030.000000
1030.000000
1030.000000
1030.000000
1030.000000
1030.000000
1030.000000
1030.000000
1030.000000
1030.000000
1030.000000
1030.000000
1030.000000
1030.000000
1030.000000
1030.000000
1030.000000
1030.000000
1030.000000
1030.000000
1030.000000
1030.000000
1030.000000
1030.000000
1030.000000
1030.000000
1030.000000
1030.000000
1030.000000
1030.000000
1030.000000
1030.000000
1030.000000
1030.000000
1030.000000
1030.000000
1030.000000
1030.000000
1030.000000
1030.000000
1030.000000
1030.000000
1030.000000
1030.000000
1030.000000
1030.000000
1030.000000
1030.000000
1030.000000
1030.000000
1030.000000
1030.000000
1030.000000
1030.000000
1030.000000
1030.000000
1030.000000
1030.000000
1030.000000
1030.000000
1030.000000
1030.000000
1030.000000
1030.000000
1030.000000
1030.000000
1030.000000
1030.000000
1030.000000
1030.000000
1030.000000
1030.000000
1030.000000
1030.000000
1030.000000
1030.000000
1030.000000
1030.000000
1030.000000
1030.000000
1030.000000
1030.000000
1030.000000
1030.000000
1030.000000
1030.000000
1030.000000
1030.000000
1030.000000
1030.000000
1030.000000
1030.000000
1030.000000
1030.000000
1030.000000
1030.000000
1030.000000
1030.000000
1030.000000
1030.000000
1030.000000
1030.000000
1030.000000
1030.000000
1030.000000
1030.000000
1030.000000
1030.000000
1030.000000
1030.000000
1030.000000
1030.000000
1030.000000
1030.000000
1030.000000
1030.000000
1030.000000
1030.000000
1030.000000
1030.000000
1030.000000
1030.000000
1030.000000
1030.000000
1030.000000
1030.000000
1030.000000
1030.000000
1030.000000
1030.000000
1030.000000
1030.000000
1030.000000
1030.000000
1030.000000
1030.000000
1030.000000
1030.000000
1030.000000
1030.000000
1030.000000
1030.000000
1030.000000
1030.000000
1030.000000
1030.000000
1030.000000
1030.000000
1030.000000
1030.000000
1030.000000
1030.000000
1030.000000
1030.000000
1030.000000
1030.000000
1030.000000
1030.000000
1030.000000
1030.000000
1030.000000
1030.000000
1030.000000
1030.000000
1030.000000
1030.000000
1030.000000
1030.000000
1030.000000
1030.000000
1030.000000
1030.000000
1030.000000
1030.000000
1030.000000
1030.000000
1030.000000
1030.000000
1030.000000
1030.000000
1030.000000
1030.000000
1030.000000
1030.000000
1030.000000
1030.000000
1030.000000
1030.000000
1030.000000
1030.000000
1030.000000
1030.000000
1030.000000
1030.000000
1030.000000
1030.000000
1030.000000
1030.000000
1030.000000
1030.000000
1030.000000
1030.000000
1030.000000
1030.000000
1030.000000
1030.000000
1030.000000
1030.000000
1030.000000
1030.000000
1030.000000
1030.000000
1030.000000
1030.000000
1030.000000
1030.000000
1030.000000
1030.000000
1030.000000
1030.000000
1030.000000
1030.000000
1030.000000
1030.000000
1030.000000
1030.000000
1030.000000
1030.000000
1030.000000
1030.000000
1030.000000
1030.000000
1030.000000
1030.000000
1030.000000
1030.000000
1030.000000
1030.000000
1030.000000
1030.000000
1030.000000
1030.000000
1030.000000
1030.000000
1030.000000
1030.000000
1030.000000
1030.000000
1030.000000
1030.000000
1030.000000
1030.000000
1030.000000
1030.000000
1030.000000
1030.000000
1030.000000
1030.000000
1030.000000
1030.000000
1030.000000
1030.000000
1030.000000
1030.000000
1030.000000
1030.000000
1030.000000
1030.000000
1030.000000
1030.000000
1030.000000
1030.000000
1030.000000
1030.000000
1030.000000
1030.000000
1030.000000
1030.000000
1030.000000
1030.000000
1030.000000
1030.000000
1030.000000
1030.000000
1030.000000
1030.000000
1030.000000
1030.000000
1030.000000
1030.000000
1030.000000
1030.000000
1030.000000
1030.000000
1030.000000
1030.000000
1030.000000
1030.000000
1030.000000
1030.000000
1030.000000
1030.000000
1030.000000
1030.000000
1030.000000
1030.000000
1030.000000
1030.000000
1030.000000
1030.000000
1030.000000
1030.000000
1030.000000
1030.000000
1030.000000
1030.000000
1030.000000
1030.000000
1030.000000
1030.000000
1030.000000
1030.000000
1030.000000
1030.000000
1030.000000
1030.000000
1030.000000
1030.000000
1030.000000
1030.000000
1030.000000
1030.000000
1030.000000
1030.000000
1030.000000
1030.000000
1030.000000
1030.000000
1030.000000
1030.000000
1030.000000
1030.000000
1030.000000
1030.000000
1030.000000
1030.000000
1030.000000
1030.000000
1030.000000
1030.000000
1030.000000
1030.000000
1030.000000
1030.000000
1030.000000
1030.000000
1030.000000
1030.000000
1030.000000
1030.000000
1030.000000
1030.000000
1030.000000
1030.000000
1030.000000
1030.000000
1030.000000
1030.000000
1030.000000
1030.000000
1030.000000
1030.000000
1030.000000
1030.000000
1030.000000
1030.000000
1030.000000
1030.000000
1030.000000
1030.000000
1030.000000
1030.000000
1030.000000
1030.000000
1030.000000
1030.000000
1030.000000
1030.000000
1030.000000
1030.000000
1030.000000
1030.000000
1030.000000
1030.000000
1030.000000
1030.000000
1030.000000
1030.000000
1030.000000
1030.000000
1030.000000
1030.000000
1030.000000
1030.000000
1030.000000
1030.000000
1030.000000
1030.000000
1030.000000
1030.000000
1030.000000
1030.000000
1030.000000
1030.000000
1030.000000
1030.000000
1030.000000
1030.000000
1030.000000
1030.000000
1030.000000
1030.000000
1030.000000
1030.000000
1030.000000
1030.000000
1030.000000
1030.000000
1030.000000
1030.000000
1030.000000
1030.000000
1030.000000
1030.000000
1030.000000
1030.000000
1030.000000
1030.000000
1030.000000
1030.000000
1030.000000
1030.000000
1030.000000
1030.000000
1030.000000
1030.000000
1030.000000
1030.000000
1030.000000
1030.000000
1030.000000
1030.000000
1030.000000
1030.000000
1030.000000
1030.000000
1030.000000
1030.000000
1030.000000
1030.000000
1030.000000
1030.000000
1030.000000
1030.000000
1030.000000
1030.000000
1030.000000
1030.000000
1030.000000
1030.000000
1030.000000
1030.000000
1030.000000
1030.000000
1030.000000
1030.000000
1030.000000
1030.000000
1030.000000
1030.000000
1030.000000
1030.000000
1030.000000
1030.000000
1030.000000
1030.000000
1030.000000
1030.000000
1030.000000
1030.000000
1030.000000
1030.000000
1030.000000
1030.000000
1030.000000
1030.000000
1030.000000
1030.000000
1030.000000
1030.000000
1030.000000
1030.000000
1030.000000
1030.000000
1030.000000
1030.000000
1030.000000
1030.000000
1030.000000
1030.000000
1030.000000
1030.000000
1030.000000
1030.000000
1030.000000
1030.000000
1030.000000
1030.000000
1030.000000
1030.000000
1030.000000
1030.000000
1030.000000
1030.000000
1030.000000
1030.000000
1030.000000
1030.000000
1030.000000
1030.000000
1030.000000
1030.000000
1030.000000
1030.000000
1030.000000
1030.000000
1030.000000
1030.000000
1030.000000
1030.000000
1030.000000
1030.000000
1030.000000
1030.000000
1030.000000
1030.000000
1030.000000
1030.000000
1030.000000
1030.000000
1030.000000
1030.000000
1030.000000
1030.000000
1030.000000
1030.000000
1030.000000
1030.000000
1030.000000
1030.000000
1030.000000
1030.000000
1030.000000
1030.000000
1030.000000
1030.000000
1030.000000
1030.000000
1030.000000
1030.000000
1030.000000
1030.000000
1030.000000
1030.000000
1030.000000
1030.000000
1030.000000
1030.000000
1030.000000
1030.000000
1030.000000
1030.000000
1030.000000
1030.000000
1030.000000
1030.000000
1030.000000
1030.000000
1030.000000
1030.000000
1030.000000
1030.000000
1030.000000
1030.000000
1030.000000
1030.000000
1030.000000
1030.000000
1030.000000
1030.000000
1030.000000
1030.000000
1030.000000
1030.000000
1030.000000
1030.000000
1030.000000
1030.000000
1030.000000
1030.000000
1030.000000
1030.000000
1030.000000
1030.000000
1030.000000
1030.000000
1030.000000
1030.000000
1030.000000
1030.000000
1030.000000
1030.000000
1030.000000
1030.000000
1030.000000
1030.000000
1030.000000
1030.000000
1030.000000
1030.000000
1030.000000
1030.000000
1030.000000
1030.000000
1030.000000
1030.000000
1030.000000
1030.000000
1030.000000
1030.000000
1030.000000
1030.000000
1030.000000
1030.000000
1030.000000
1030.000000
1030.000000
1030.000000
1030.000000
1030.000000
1030.000000
1030.000000
1030.000000
1030.000000
1030.000000
1030.000000
1030.000000
1030.000000
1030.000000
1030.000000
1030.000000
1030.000000
1030.000000
1030.000000
1030.000000
1030.000000
1030.000000
1030.000000
1030.000000
1030.000000
1030.000000
1030.000000
1030.000000
1030.000000
1030.000000
1030.000000
1030.000000
1030.000000
1030.000000
1030.000000
1030.000000
1030.000000
1030.000000
1030.000000
1030.000000
1030.000000
1030.000000
1030.000000
1030.000000
1030.000000
1030.000000
1030.000000
1030.000000
1030.000000
1030.000000
1030.000000
1030.000000
1030.000000
1030.000000
1030.000000
1030.000000
1030.000000
1030.000000
1030.000000
1030.000000
1030.000000
1030.000000
1030.000000
1030.000000
1030.000000
1030.000000
1030.000000
1030.000000
1030.000000
1030.000000
1030.000000
1030.000000
1030.000000
1030.000000
1030.000000
1030.000000
1030.000000
1030.000000
1030.000000
1030.000000
1030.000000
1030.000000
1030.000000
1030.000000
1030.000000
1030.000000
1030.000000
1030.000000
1030.000000
1030.000000
1030.000000
1030.000000
1030.000000
1030.000000
1030.000000
1030.000000
1030.000000
1030.000000
1030.000000
1030.000000
1030.000000
1030.000000
1030.000000
1030.000000
1030.000000
1030.000000
1030.000000
1030.000000
1030.000000
1030.000000
1030.000000
1030.000000
1030.000000
1030.000000
1030.000000
1030.000000
1030.000000
1030.000000
1030.000000
1030.000000
1030.000000
1030.000000
1030.000000
1030.000000
1030.000000
1030.000000
1030.000000
1030.000000
1030.000000
1030.000000
1030.000000
1030.000000
1030.000000
1030.000000
1030.000000
1030.000000
1030.000000
1030.000000
1030.000000
1030.000000
1030.000000
1030.000000
1030.000000
1030.000000
1030.000000
1030.000000
1030.000000
1030.000000
1030.000000
1030.000000
1030.000000
1030.000000
1030.000000
1030.000000
1030.000000
1030.000000
1030.000000
1030.000000
1030.000000
1030.000000
1030.000000
1030.000000
1030.000000
1030.000000
1030.000000
1030.000000
1030.000000
1030.000000
1030.000000
1030.000000
1030.000000
1030.000000
1030.000000
1030.000000
1030.000000
1030.000000
1030.000000
1030.000000
1030.000000
1030.000000
1030.000000
1030.000000
1030.000000
1030.000000
1030.000000
1030.000000
1030.000000
1030.000000
1030.000000
1030.000000
1030.000000
1030.000000
1030.000000
1030.000000
1030.000000
1030.000000
1030.000000
1030.000000
1030.000000
1030.000000
1030.000000
1030.000000
1030.000000
1030.000000
1030.000000
1030.000000
1030.000000
1030.000000
1030.000000
1030.000000
1030.000000
1030.000000
1030.000000
1030.000000
1030.000000
1030.000000
1030.000000
1030.000000
1030.000000
1030.000000
1030.000000
1030.000000
1030.000000
1030.000000
1030.000000
1030.000000
1030.000000
1030.000000
1030.000000
1030.000000
1030.000000
1030.000000
1030.000000
1030.000000
1030.000000
1030.000000
1030.000000
1030.000000
1030.000000
1030.000000
1030.000000
1030.000000
1030.000000
1030.000000
1030.000000
1030.000000
1030.000000
1030.000000
1030.000000
1030.000000
1030.000000
1030.000000
1030.000000
1030.000000
1030.000000
1030.000000
1030.000000
1030.000000
1030.000000
1030.000000
1030.000000
1030.000000
1030.000000
1030.000000
1030.000000
1030.000000
1030.000000
1030.000000
1030.000000
1030.000000
1030.000000
1030.000000
1030.000000
1030.000000
1030.000000
1030.000000
1030.000000
1030.000000
1030.000000
1030.000000
1030.000000
1030.000000
1030.000000
1030.000000
1030.000000
1030.000000
1030.000000
1030.000000
1030.000000
1030.000000
1030.000000
1030.000000
1030.000000
1030.000000
1030.000000
1030.000000
1030.000000
1030.000000
1030.000000
1030.000000
1030.000000
1030.000000
1030.000000
1030.000000
1030.000000
1030.000000
1030.000000
1030.000000
1030.000000
1030.000000
1030.000000
1030.000000
1030.000000
1030.000000
1030.000000
1030.000000
1030.000000
1030.000000
1030.000000
1030.000000
1030.000000
1030.000000
1030.000000
1030.000000
1030.000000
1030.000000
1030.000000
1030.000000
1030.000000
1030.000000
1030.000000
1030.000000
1030.000000
1030.000000
1030.000000
1030.000000
1030.000000
1030.000000
1030.000000
1030.000000
1030.000000
1030.000000
1030.000000
1030.000000
1030.000000
1030.000000
1030.000000
1030.000000
1030.000000
1030.000000
1030.000000
1030.000000
1030.000000
1030.000000
1030.000000
1030.000000
1030.000000
1030.000000
1030.000000
1030.000000
1030.000000
1030.000000
1030.000000
1030.000000
1030.000000
1030.000000
1030.000000
1030.000000
1030.000000
1030.000000
1030.000000
1030.000000
1030.000000
1030.000000
1030.000000
1030.000000
1030.000000
1030.000000
1030.000000
1030.000000
1030.000000
1030.000000
1030.000000
1030.000000
1030.000000
1030.000000
1030.000000
1030.000000
1030.000000
1030.000000
1030.000000
1030.000000
1030.000000
1030.000000
1030.000000
1030.000000
1030.000000
1030.000000
1030.000000
1030.000000
1030.000000
1030.000000
1030.000000
1030.000000
1030.000000
1030.000000
1030.000000
1030.000000
1030.000000
1030.000000
1030.000000
1030.000000
1030.000000
1030.000000
1030.000000
1030.000000
1030.000000
1030.000000
1030.000000
1030.000000
1030.000000
1030.000000
1030.000000
1030.000000
1030.000000
1030.000000
1030.000000
1030.000000
1030.000000
1030.000000
1030.000000
1030.000000
1030.000000
1030.000000
1030.000000
1030.000000
1030.000000
1030.000000
1030.000000
1030.000000
1030.000000
1030.000000
1030.000000
1030.000000
1030.000000
1030.000000
1030.000000
1030.000000
1030.000000
1030.000000
1030.000000
1030.000000
1030.000000
1030.000000
1030.000000
1030.000000
1030.000000
1030.000000
1030.000000
1030.000000
1030.000000
1030.000000
1030.000000
1030.000000
1030.000000
1030.000000
1030.000000
1030.000000
1030.000000
1030.000000
1030.000000
1030.000000
1030.000000
1030.000000
1030.000000
1030.000000
1030.000000
1030.000000
1030.000000
1030.000000
1030.000000
1030.000000
1030.000000
1030.000000
1030.000000
1030.000000
1030.000000
1030.000000
1030.000000
1030.000000
1030.000000
1030.000000
1030.000000
1030.000000
1030.000000
1030.000000
1030.000000
1030.000000
1030.000000
1030.000000
1030.000000
1030.000000
1030.000000
1030.000000
1030.000000
1030.000000
1030.000000
1030.000000
1030.000000
1030.000000
1030.000000
1030.000000
1030.000000
1030.000000
1030.000000
1030.000000
1030.000000
1030.000000
1030.000000
1030.000000
1030.000000
1030.000000
1030.000000
1030.000000
1030.000000
1030.000000
1030.000000
1030.000000
1030.000000
1030.000000
1030.000000
1030.000000
1030.000000
1030.000000
1030.000000
1030.000000
1030.000000
1030.000000
1030.000000
1030.000000
1030.000000
1030.000000
1030.000000
1030.000000
1030.000000
1030.000000
1030.000000
1030.000000
1030.000000
1030.000000
1030.000000
1030.000000
1030.000000
1030.000000
1030.000000
1030.000000
1030.000000
1030.000000
1030.000000
1030.000000
1030.000000
1030.000000
1030.000000
1030.000000
1030.000000
1030.000000
1030.000000
1030.000000
1030.000000
1030.000000
1030.000000
1030.000000
1030.000000
1030.000000
1030.000000
1030.000000
1030.000000
1030.000000
1030.000000
1030.000000
1030.000000
1030.000000
1030.000000
1030.000000
1030.000000
1030.000000
1030.000000
1030.000000
1030.000000
1030.000000
1030.000000
1030.000000
1030.000000
1030.000000
1030.000000
1030.000000
1030.000000
1030.000000
1030.000000
1030.000000
1030.000000
1030.000000
1030.000000
1030.000000
1030.000000
1030.000000
1030.000000
1030.000000
1030.000000
1030.000000
1030.000000
1030.000000
1030.000000
1030.000000
1030.000000
1030.000000
1030.000000
1030.000000
1030.000000
1030.000000
1030.000000
1030.000000
1030.000000
1030.000000
1030.000000
1030.000000
1030.000000
1030.000000
1030.000000
1030.000000
1030.000000
1030.000000
1030.000000
1030.000000
1030.000000
1030.000000
1030.000000
1030.000000
1030.000000
1030.000000
1030.000000
1030.000000
1030.000000
1030.000000
1030.000000
1030.000000
1030.000000
1030.000000
1030.000000
1030.000000
1030.000000
1030.000000
1030.000000
1030.000000
1030.000000
1030.000000
1030.000000
1030.000000
1030.000000
1030.000000
1030.000000
1030.000000
1030.000000
1030.000000
1030.000000
1030.000000
1030.000000
1030.000000
1030.000000
1030.000000
1030.000000
1030.000000
1030.000000
1030.000000
1030.000000
1030.000000
1030.000000
1030.000000
1030.000000
1030.000000
1030.000000
1030.000000
1030.000000
1030.000000
1030.000000
1030.000000
1030.000000
1030.000000
1030.000000
1030.000000
1030.000000
1030.000000
1030.000000
1030.000000
1030.000000
1030.000000
1030.000000
1030.000000
1030.000000
1030.000000
1030.000000
1030.000000
1030.000000
1030.000000
1030.000000
1030.000000
1030.000000
1030.000000
1030.000000
1030.000000
1030.000000
1030.000000
1030.000000
1030.000000
1030.000000
1030.000000
1030.000000
1030.000000
1030.000000
1030.000000
1030.000000
1030.000000
1030.000000
1030.000000
1030.000000
1030.000000
1030.000000
1030.000000
1030.000000
1030.000000
1030.000000
1030.000000
1030.000000
1030.000000
1030.000000
1030.000000
1030.000000
1030.000000
1030.000000
1030.000000
1030.000000
1030.000000
1030.000000
1030.000000
1030.000000
1030.000000
1030.000000
1030.000000
1030.000000
1030.000000
1030.000000
1030.000000
1030.000000
1030.000000
1030.000000
1030.000000
1030.000000
1030.000000
1030.000000
1030.000000
1030.000000
1030.000000
1030.000000
1030.000000
1030.000000
1030.000000
1030.000000
1030.000000
1030.000000
1030.000000
1030.000000
1030.000000
1030.000000
1030.000000
1030.000000
1030.000000
1030.000000
1030.000000
1030.000000
1030.000000
1030.000000
1030.000000
1030.000000
1030.000000
1030.000000
1030.000000
1030.000000
1030.000000
1030.000000
1030.000000
1030.000000
1030.000000
1030.000000
1030.000000
1030.000000
1030.000000
1030.000000
1030.000000
1030.000000
1030.000000
1030.000000
1030.000000
1030.000000
1030.000000
1030.000000
1030.000000
1030.000000
1030.000000
1030.000000
1030.000000
1030.000000
1030.000000
1030.000000
1030.000000
1030.000000
1030.000000
1030.000000
1030.000000
1030.000000
1030.000000
1030.000000
1030.000000
1030.000000
1030.000000
1030.000000
1030.000000
1030.000000
1030.000000
1030.000000
1030.000000
1030.000000
1030.000000
1030.000000
1030.000000
1030.000000
1030.000000
1030.000000
1030.000000
1030.000000
1030.000000
1030.000000
1030.000000
1030.000000
1030.000000
1030.000000
1030.000000
1030.000000
1030.000000
1030.000000
1030.000000
1030.000000
1030.000000
1030.000000
1030.000000
1030.000000
1030.000000
1030.000000
1030.000000
1030.000000
1030.000000
1030.000000
1030.000000
1030.000000
1030.000000
1030.000000
1030.000000
1030.000000
1030.000000
1030.000000
1030.000000
1030.000000
1030.000000
1030.000000
1030.000000
1030.000000
1030.000000
1030.000000
1030.000000
1030.000000
1030.000000
1030.000000
1030.000000
1030.000000
1030.000000
1030.000000
1030.000000
1030.000000
1030.000000
1030.000000
1030.000000
1030.000000
1030.000000
1030.000000
1030.000000
1030.000000
1030.000000
1030.000000
1030.000000
1030.000000
1030.000000
1030.000000
1030.000000
1030.000000
1030.000000
1030.000000
1030.000000
1030.000000
1030.000000
1030.000000
1030.000000
1030.000000
1030.000000
1030.000000
1030.000000
1030.000000
1030.000000
1030.000000
1030.000000
1030.000000
1030.000000
1030.000000
1030.000000
1030.000000
1030.000000
1030.000000
1030.000000
1030.000000
1030.000000
1030.000000
1030.000000
1030.000000
1030.000000
1030.000000
1030.000000
1030.000000
1030.000000
1030.000000
1030.000000
1030.000000
1030.000000
1030.000000
1030.000000
1030.000000
1030.000000
1030.000000
1030.000000
1030.000000
1030.000000
1030.000000
1030.000000
1030.000000
1030.000000
1030.000000
1030.000000
1030.000000
1030.000000
1030.000000
1030.000000
1030.000000
1030.000000
1030.000000
1030.000000
1030.000000
1030.000000
1030.000000
1030.000000
1030.000000
1030.000000
1030.000000
1030.000000
1030.000000
1030.000000
1030.000000
1030.000000
1030.000000
1030.000000
1030.000000
1030.000000
1030.000000
1030.000000
1030.000000
1030.000000
1030.000000
1030.000000
1030.000000
1030.000000
1030.000000
1030.000000
1030.000000
1030.000000
1030.000000
1030.000000
1030.000000
1030.000000
1030.000000
1030.000000
1030.000000
1030.000000
1030.000000
1030.000000
1030.000000
1030.000000
1030.000000
1030.000000
1030.000000
1030.000000
1030.000000
1030.000000
1030.000000
1030.000000
1030.000000
1030.000000
1030.000000
1030.000000
1030.000000
1030.000000
1030.000000
1030.000000
1030.000000
1030.000000
1030.000000
1030.000000
1030.000000
1030.000000
1030.000000
1030.000000
1030.000000
1030.000000
1030.000000
1030.000000
1030.000000
1030.000000
1030.000000
1030.000000
1030.000000
1030.000000
1030.000000
1030.000000
1030.000000
1030.000000
1030.000000
1030.000000
1030.000000
1030.000000
1030.000000
1030.000000
1030.000000
1030.000000
1030.000000
1030.000000
1030.000000
1030.000000
1030.000000
1030.000000
1030.000000
1030.000000
1030.000000
1030.000000
1030.000000
1030.000000
1030.000000
1030.000000
1030.000000
1030.000000
1030.000000
1030.000000
1030.000000
1030.000000
1030.000000
1030.000000
1030.000000
1030.000000
1030.000000
1030.000000
1030.000000
1030.000000
1030.000000
1030.000000
1030.000000
1030.000000
1030.000000
1030.000000
1030.000000
1030.000000
1030.000000
1030.000000
1030.000000
1030.000000
1030.000000
1030.000000
1030.000000
1030.000000
1030.000000
1030.000000
1030.000000
1030.000000
1030.000000
1030.000000
1030.000000
1030.000000
1030.000000
1030.000000
1030.000000
1030.000000
1030.000000
1030.000000
1030.000000
1030.000000
1030.000000
1030.000000
1030.000000
1030.000000
1030.000000
1030.000000
1030.000000
1030.000000
1030.000000
1030.000000
1030.000000
1030.000000
1030.000000
1030.000000
1030.000000
1030.000000
1030.000000
1030.000000
1030.000000
1030.000000
1030.000000
1030.000000
1030.000000
1030.000000
1030.000000
1030.000000
1030.000000
1030.000000
1030.000000
1030.000000
1030.000000
1030.000000
1030.000000
1030.000000
1030.000000
1030.000000
1030.000000
1030.000000
1030.000000
1030.000000
1030.000000
1030.000000
1030.000000
1030.000000
1030.000000
1030.000000
1030.000000
1030.000000
1030.000000
1030.000000
1030.000000
1030.000000
1030.000000
1030.000000
1030.000000
1030.000000
1030.000000
1030.000000
1030.000000
1030.000000
1030.000000
1030.000000
1030.000000
1030.000000
1030.000000
1030.000000
1030.000000
1030.000000
1030.000000
1030.000000
1030.000000
1030.000000
1030.000000
1030.000000
1030.000000
1030.000000
1030.000000
1030.000000
1030.000000
1030.000000
1030.000000
1030.000000
1030.000000
1030.000000
1030.000000
1030.000000
1030.000000
1030.000000
1030.000000
1030.000000
1030.000000
1030.000000
1030.000000
1030.000000
1030.000000
1030.000000
1030.000000
1030.000000
1030.000000
1030.000000
1030.000000
1030.000000
1030.000000
1030.000000
1030.000000
1030.000000
1030.000000
1030.000000
1030.000000
1030.000000
1030.000000
1030.000000
1030.000000
1030.000000
1030.000000
1030.000000
1030.000000
1030.000000
1030.000000
1030.000000
1030.000000
1030.000000
1030.000000
1030.000000
1030.000000
1030.000000
1030.000000
1030.000000
1030.000000
1030.000000
1030.000000
1030.000000
1030.000000
1030.000000
1030.000000
1030.000000
1030.000000
1030.000000
1030.000000
1030.000000
1030.000000
1030.000000
1030.000000
1030.000000
1030.000000
1030.000000
1030.000000
1030.000000
1030.000000
1030.000000
1030.000000
1030.000000
1030.000000
1030.000000
1030.000000
1030.000000
1030.000000
1030.000000
1030.000000
1030.000000
1030.000000
1030.000000
1030.000000
1030.000000
1030.000000
1030.000000
1030.000000
1030.000000
1030.000000
1030.000000
1030.000000
1030.000000
1030.000000
1030.000000
1030.000000
1030.000000
1030.000000
1030.000000
1030.000000
1030.000000
1030.000000
1030.000000
1030.000000
1030.000000
1030.000000
1030.000000
1030.000000
1030.000000
1030.000000
1030.000000
1030.000000
1030.000000
1030.000000
1030.000000
1030.000000
1030.000000
1030.000000
1030.000000
1030.000000
1030.000000
1030.000000
1030.000000
1030.000000
1030.000000
1030.000000
1030.000000
1030.000000
1030.000000
1030.000000
1030.000000
1030.000000
1030.000000
1030.000000
1030.000000
1030.000000
1030.000000
1030.000000
1030.000000
1030.000000
1030.000000
1030.000000
1030.000000
1030.000000
1030.000000
1030.000000
1030.000000
1030.000000
1030.000000
1030.000000
1030.000000
1030.000000
1030.000000
1030.000000
1030.000000
1030.000000
1030.000000
1030.000000
1030.000000
1030.000000
1030.000000
1030.000000
1030.000000
1030.000000
1030.000000
1030.000000
1030.000000
1030.000000
1030.000000
1030.000000
1030.000000
1030.000000
1030.000000
1030.000000
1030.000000
1030.000000
1030.000000
1030.000000
1030.000000
1030.000000
1030.000000
1030.000000
1030.000000
1030.000000
1030.000000
1030.000000
1030.000000
1030.000000
1030.000000
1030.000000
1030.000000
1030.000000
1030.000000
1030.000000
1030.000000
1030.000000
1030.000000
1030.000000
1030.000000
1030.000000
1030.000000
1030.000000
1030.000000
1030.000000
1030.000000
1030.000000
1030.000000
1030.000000
1030.000000
1030.000000
1030.000000
1030.000000
1030.000000
1030.000000
1030.000000
1030.000000
1030.000000
1030.000000
1030.000000
1030.000000
1030.000000
1030.000000
1030.000000
1030.000000
1030.000000
1030.000000
1030.000000
1030.000000
1030.000000
1030.000000
1030.000000
1030.000000
1030.000000
1030.000000
1030.000000
1030.000000
1030.000000
1030.000000
1030.000000
1030.000000
1030.000000
1030.000000
1030.000000
1030.000000
1030.000000
1030.000000
1030.000000
1030.000000
1030.000000
1030.000000
1030.000000
1030.000000
1030.000000
1030.000000
1030.000000
1030.000000
1030.000000
1030.000000
1030.000000
1030.000000
1030.000000
1030.000000
1030.000000
1030.000000
1030.000000
1030.000000
1030.000000
1030.000000
1030.000000
1030.000000
1030.000000
1030.000000
1030.000000
1030.000000
1030.000000
1030.000000
1030.000000
1030.000000
1030.000000
1030.000000
1030.000000
1030.000000
1030.000000
1030.000000
1030.000000
1030.000000
1030.000000
1030.000000
1030.000000
1030.000000
1030.000000
1030.000000
1030.000000
1030.000000
1030.000000
1030.000000
1030.000000
1030.000000
1030.000000
1030.000000
1030.000000
1030.000000
1030.000000
1030.000000
1030.000000
1030.000000
1030.000000
1030.000000
1030.000000
1030.000000
1030.000000
1030.000000
1030.000000
1030.000000
1030.000000
1030.000000
1030.000000
1030.000000
1030.000000
1030.000000
1030.000000
1030.000000
1030.000000
1030.000000
1030.000000
1030.000000
1030.000000
1030.000000
1030.000000
1030.000000
1030.000000
1030.000000
1030.000000
1030.000000
1030.000000
1030.000000
1030.000000
1030.000000
1030.000000
1030.000000
1030.000000
1030.000000
1030.000000
1030.000000
1030.000000
1030.000000
1030.000000
1030.000000
1030.000000
1030.000000
1030.000000
1030.000000
1030.000000
1030.000000
1030.000000
1030.000000
1030.000000
1030.000000
1030.000000
1030.000000
1030.000000
1030.000000
1030.000000
1030.000000
1030.000000
1030.000000
1030.000000
1030.000000
1030.000000
1030.000000
1030.000000
1030.000000
1030.000000
1030.000000
1030.000000
1030.000000
1030.000000
1030.000000
1030.000000
1030.000000
1030.000000
1030.000000
1030.000000
1030.000000
1030.000000
1030.000000
1030.000000
1030.000000
1030.000000
1030.000000
1030.000000
1030.000000
1030.000000
1030.000000
1030.000000
1030.000000
1030.000000
1030.000000
1030.000000
1030.000000
1030.000000
1030.000000
1030.000000
1030.000000
1030.000000
1030.000000
1030.000000
1030.000000
1030.000000
1030.000000
1030.000000
1030.000000
1030.000000
1030.000000
1030.000000
1030.000000
1030.000000
1030.000000
1030.000000
1030.000000
1030.000000
1030.000000
1030.000000
1030.000000
1030.000000
1030.000000
1030.000000
1030.000000
1030.000000
1030.000000
1030.000000
1030.000000
1030.000000
1030.000000
1030.000000
1030.000000
1030.000000
1030.000000
1030.000000
1030.000000
1030.000000
1030.000000
1030.000000
1030.000000
1030.000000
1030.000000
1030.000000
1030.000000
1030.000000
1030.000000
1030.000000
1030.000000
1030.000000
1030.000000
1030.000000
1030.000000
1030.000000
1030.000000
1030.000000
1030.000000
1030.000000
1030.000000
1030.000000
1030.000000
1030.000000
1030.000000
1030.000000
1030.000000
1030.000000
1030.000000
1030.000000
1030.000000
1030.000000
1030.000000
1030.000000
1030.000000
1030.000000
1030.000000
1030.000000
1030.000000
1030.000000
1030.000000
1030.000000
1030.000000
1030.000000
1030.000000
1030.000000
1030.000000
1030.000000
1030.000000
1030.000000
1030.000000
1030.000000
1030.000000
1030.000000
1030.000000
1030.000000
1030.000000
1030.000000
1030.000000
1030.000000
1030.000000
1030.000000
1030.000000
1030.000000
1030.000000
1030.000000
1030.000000
1030.000000
1030.000000
1030.000000
1030.000000
1030.000000
1030.000000
1030.000000
1030.000000
1030.000000
1030.000000
1030.000000
1030.000000
1030.000000
1030.000000
1030.000000
1030.000000
1030.000000
1030.000000
1030.000000
1030.000000
1030.000000
1030.000000
1030.000000
1030.000000
1030.000000
1030.000000
1030.000000
1030.000000
1030.000000
1030.000000
1030.000000
1030.000000
1030.000000
1030.000000
1030.000000
1030.000000
1030.000000
1030.000000
1030.000000
1030.000000
1030.000000
1030.000000
1030.000000
1030.000000
1030.000000
1030.000000
1030.000000
1030.000000
1030.000000
1030.000000
1030.000000
1030.000000
1030.000000
1030.000000
1030.000000
1030.000000
1030.000000
1030.000000
1030.000000
1030.000000
1030.000000
1030.000000
1030.000000
1030.000000
1030.000000
1030.000000
1030.000000
1030.000000
1030.000000
1030.000000
1030.000000
1030.000000
1030.000000
1030.000000
1030.000000
1030.000000
1030.000000
1030.000000
1030.000000
1030.000000
1030.000000
1030.000000
1030.000000
1030.000000
1030.000000
1030.000000
1030.000000
1030.000000
1030.000000
1030.000000
1030.000000
1030.000000
1030.000000
1030.000000
1030.000000
1030.000000
1030.000000
1030.000000
1030.000000
1030.000000
1030.000000
1030.000000
1030.000000
1030.000000
1030.000000
1030.000000
1030.000000
1030.000000
1030.000000
1030.000000
1030.000000
1030.000000
1030.000000
1030.000000
1030.000000
1030.000000
1030.000000
1030.000000
1030.000000
1030.000000
1030.000000
1030.000000
1030.000000
1030.000000
1030.000000
1030.000000
1030.000000
1030.000000
1030.000000
1030.000000
1030.000000
1030.000000
1030.000000
1030.000000
1030.000000
1030.000000
1030.000000
1030.000000
1030.000000
1030.000000
1030.000000
1030.000000
1030.000000
1030.000000
1030.000000
1030.000000
1030.000000
1030.000000
1030.000000
1030.000000
1030.000000
1030.000000
1030.000000
1030.000000
1030.000000
1030.000000
1030.000000
1030.000000
1030.000000
1030.000000
1030.000000
1030.000000
1030.000000
1030.000000
1030.000000
1030.000000
1030.000000
1030.000000
1030.000000
1030.000000
1030.000000
1030.000000
1030.000000
1030.000000
1030.000000
1030.000000
1030.000000
1030.000000
1030.000000
1030.000000
1030.000000
1030.000000
1030.000000
1030.000000
1030.000000
1030.000000
1030.000000
1030.000000
1030.000000
1030.000000
1030.000000
1030.000000
1030.000000
1030.000000
1030.000000
1030.000000
1030.000000
1030.000000
1030.000000
1030.000000
1030.000000
1030.000000
1030.000000
1030.000000
1030.000000
1030.000000
1030.000000
1030.000000
1030.000000
1030.000000
1030.000000
1030.000000
1030.000000
1030.000000
1030.000000
1030.000000
1030.000000
1030.000000
1030.000000
1030.000000
1030.000000
1030.000000
1030.000000
1030.000000
1030.000000
1030.000000
1030.000000
1030.000000
1030.000000
1030.000000
1030.000000
1030.000000
1030.000000
1030.000000
1030.000000
1030.000000
1030.000000
1030.000000
1030.000000
1030.000000
1030.000000
1030.000000
1030.000000
1030.000000
1030.000000
1030.000000
1030.000000
1030.000000
1030.000000
1030.000000
1030.000000
1030.000000
1030.000000
1030.000000
1030.000000
1030.000000
1030.000000
1030.000000
1030.000000
1030.000000
1030.000000
1030.000000
1030.000000
1030.000000
1030.000000
1030.000000
1030.000000
1030.000000
1030.000000
1030.000000
1030.000000
1030.000000
1030.000000
1030.000000
1030.000000
1030.000000
1030.000000
1030.000000
1030.000000
1030.000000
1030.000000
1030.000000
1030.000000
1030.000000
1030.000000
1030.000000
1030.000000
1030.000000
1030.000000
1030.000000
1030.000000
1030.000000
1030.000000
1030.000000
1030.000000
1030.000000
1030.000000
1030.000000
1030.000000
1030.000000
1030.000000
1030.000000
1030.000000
1030.000000
1030.000000
1030.000000
1030.000000
1030.000000
1030.000000
1030.000000
1030.000000
1030.000000
1030.000000
1030.000000
1030.000000
1030.000000
1030.000000
1030.000000
1030.000000
1030.000000
1030.000000
1030.000000
1030.000000
1030.000000
1030.000000
1030.000000
1030.000000
1030.000000
1030.000000
1030.000000
1030.000000
1030.000000
1030.000000
1030.000000
1030.000000
1030.000000
1030.000000
1030.000000
1030.000000
1030.000000
1030.000000
1030.000000
1030.000000
1030.000000
1030.000000
1030.000000
1030.000000
1030.000000
1030.000000
1030.000000
1030.000000
1030.000000
1030.000000
1030.000000
1030.000000
1030.000000
1030.000000
1030.000000
1030.000000
1030.000000
1030.000000
1030.000000
1030.000000
1030.000000
1030.000000
1030.000000
1030.000000
1030.000000
1030.000000
1030.000000
1030.000000
1030.000000
1030.000000
1030.000000
1030.000000
1030.000000
1030.000000
1030.000000
1030.000000
1030.000000
1030.000000
1030.000000
1030.000000
1030.000000
1030.000000
1030.000000
1030.000000
1030.000000
1030.000000
1030.000000
1030.000000
1030.000000
1030.000000
1030.000000
1030.000000
1030.000000
1030.000000
1030.000000
1030.000000
1030.000000
1030.000000
1030.000000
1030.000000
1030.000000
1030.000000
1030.000000
1030.000000
1030.000000
1030.000000
1030.000000
1030.000000
1030.000000
1030.000000
1030.000000
1030.000000
1030.000000
1030.000000
1030.000000
1030.000000
1030.000000
1030.000000
1030.000000
1030.000000
1030.000000
1030.000000
1030.000000
1030.000000
1030.000000
1030.000000
1030.000000
1030.000000
1030.000000
1030.000000
1030.000000
1030.000000
1030.000000
1030.000000
1030.000000
1030.000000
1030.000000
1030.000000
1030.000000
1030.000000
1030.000000
1030.000000
1030.000000
1030.000000
1030.000000
1030.000000
1030.000000
1030.000000
1030.000000
1030.000000
1030.000000
1030.000000
1030.000000
1030.000000
1030.000000
1030.000000
1030.000000
1030.000000
1030.000000
1030.000000
1030.000000
1030.000000
1030.000000
1030.000000
1030.000000
1030.000000
1030.000000
1030.000000
1030.000000
1030.000000
1030.000000
1030.000000
1030.000000
1030.000000
1030.000000
1030.000000
1030.000000
1030.000000
1030.000000
1030.000000
1030.000000
1030.000000
1030.000000
1030.000000
1030.000000
1030.000000
1030.000000
1030.000000
1030.000000
1030.000000
1030.000000
1030.000000
1030.000000
1030.000000
1030.000000
1030.000000
1030.000000
1030.000000
1030.000000
1030.000000
1030.000000
1030.000000
1030.000000
1030.000000
1030.000000
1030.000000
1030.000000
1030.000000
1030.000000
1030.000000
1030.000000
1030.000000
1030.000000
1030.000000
1030.000000
1030.000000
1030.000000
1030.000000
1030.000000
1030.000000
1030.000000
1030.000000
1030.000000
1030.000000
1030.000000
1030.000000
1030.000000
1030.000000
1030.000000
1030.000000
1030.000000
1030.000000
1030.000000
1030.000000
1030.000000
1030.000000
1030.000000
1030.000000
1030.000000
1030.000000
1030.000000
1030.000000
1030.000000
1030.000000
1030.000000
1030.000000
1030.000000
1030.000000
1030.000000
1030.000000
1030.000000
1030.000000
1030.000000
1030.000000
1030.000000
1030.000000
1030.000000
1030.000000
1030.000000
1030.000000
1030.000000
1030.000000
1030.000000
1030.000000
1030.000000
1030.000000
1030.000000
1030.000000
1030.000000
1030.000000
1030.000000
1030.000000
1030.000000
1030.000000
1030.000000
1030.000000
1030.000000
1030.000000
1030.000000
1030.000000
1030.000000
1030.000000
1030.000000
1030.000000
1030.000000
1030.000000
1030.000000
1030.000000
1030.000000
1030.000000
1030.000000
1030.000000
1030.000000
1030.000000
1030.000000
1030.000000
1030.000000
1030.000000
1030.000000
1030.000000
1030.000000
1030.000000
1030.000000
1030.000000
1030.000000
1030.000000
1030.000000
1030.000000
1030.000000
1030.000000
1030.000000
1030.000000
1030.000000
1030.000000
1030.000000
1030.000000
1030.000000
1030.000000
1030.000000
1030.000000
1030.000000
1030.000000
1030.000000
1030.000000
1030.000000
1030.000000
1030.000000
1030.000000
1030.000000
1030.000000
1030.000000
1030.000000
1030.000000
1030.000000
1030.000000
1030.000000
1030.000000
1030.000000
1030.000000
1030.000000
1030.000000
1030.000000
1030.000000
1030.000000
1030.000000
1030.000000
1030.000000
1030.000000
1030.000000
1030.000000
1030.000000
1030.000000
1030.000000
1030.000000
1030.000000
1030.000000
1030.000000
1030.000000
1030.000000
1030.000000
1030.000000
1030.000000
1030.000000
1030.000000
1030.000000
1030.000000
1030.000000
1030.000000
1030.000000
1030.000000
1030.000000
1030.000000
1030.000000
1030.000000
1030.000000
1030.000000
1030.000000
1030.000000
1030.000000
1030.000000
1030.000000
1030.000000
1030.000000
1030.000000
1030.000000
1030.000000
1030.000000
1030.000000
1030.000000
1030.000000
1030.000000
1030.000000
1030.000000
1030.000000
1030.000000
1030.000000
1030.000000
1030.000000
1030.000000
1030.000000
1030.000000
1030.000000
1030.000000
1030.000000
1030.000000
1030.000000
1030.000000
1030.000000
1030.000000
1030.000000
1030.000000
1030.000000
1030.000000
1030.000000
1030.000000
1030.000000
1030.000000
1030.000000
1030.000000
1030.000000
1030.000000
1030.000000
1030.000000
1030.000000
1030.000000
1030.000000
1030.000000
1030.000000
1030.000000
1030.000000
1030.000000
1030.000000
1030.000000
1030.000000
1030.000000
1030.000000
1030.000000
1030.000000
1030.000000
1030.000000
1030.000000
1030.000000
1030.000000
1030.000000
1030.000000
1030.000000
1030.000000
1030.000000
1030.000000
1030.000000
1030.000000
1030.000000
1030.000000
1030.000000
1030.000000
1030.000000
1030.000000
1030.000000
1030.000000
1030.000000
1030.000000
1030.000000
1030.000000
1030.000000
1030.000000
1030.000000
1030.000000
1030.000000
1030.000000
1030.000000
1030.000000
1030.000000
1030.000000
1030.000000
1030.000000
1030.000000
1030.000000
1030.000000
1030.000000
1030.000000
1030.000000
1030.000000
1030.000000
1030.000000
1030.000000
1030.000000
1030.000000
1030.000000
1030.000000
1030.000000
1030.000000
1030.000000
1030.000000
1030.000000
1030.000000
1030.000000
1030.000000
1030.000000
1030.000000
1030.000000
1030.000000
1030.000000
1030.000000
1030.000000
1030.000000
1030.000000
1030.000000
1030.000000
1030.000000
1030.000000
1030.000000
1030.000000
1030.000000
1030.000000
1030.000000
1030.000000
1030.000000
1030.000000
1030.000000
1030.000000
1030.000000
1030.000000
1030.000000
1030.000000
1030.000000
1030.000000
1030.000000
1030.000000
1030.000000
1030.000000
1030.000000
1030.000000
1030.000000
1030.000000
1030.000000
1030.000000
1030.000000
1030.000000
1030.000000
1030.000000
1030.000000
1030.000000
1030.000000
1030.000000
1030.000000
1030.000000
1030.000000
1030.000000
1030.000000
1030.000000
1030.000000
1030.000000
1030.000000
1030.000000
1030.000000
1030.000000
1030.000000
1030.000000
1030.000000
1030.000000
1030.000000
1030.000000
1030.000000
1030.000000
1030.000000
1030.000000
1030.000000
1030.000000
1030.000000
1030.000000
1030.000000
1030.000000
1030.000000
1030.000000
1030.000000
1030.000000
1030.000000
1030.000000
1030.000000
1030.000000
1030.000000
1030.000000
1030.000000
1030.000000
1030.000000
1030.000000
1030.000000
1030.000000
1030.000000
1030.000000
1030.000000
1030.000000
1030.000000
1030.000000
1030.000000
1030.000000
1030.000000
1030.000000
1030.000000
1030.000000
1030.000000
1030.000000
1030.000000
1030.000000
1030.000000
1030.000000
1030.000000
1030.000000
1030.000000
1030.000000
1030.000000
1030.000000
1030.000000
1030.000000
1030.000000
1030.000000
1030.000000
1030.000000
1030.000000
1030.000000
1030.000000
1030.000000
1030.000000
1030.000000
1030.000000
1030.000000
1030.000000
1030.000000
1030.000000
1030.000000
1030.000000
1030.000000
1030.000000
1030.000000
1030.000000
1030.000000
1030.000000
1030.000000
1030.000000
1030.000000
1030.000000
1030.000000
1030.000000
1030.000000
1030.000000
1030.000000
1030.000000
1030.000000
1030.000000
1030.000000
1030.000000
1030.000000
1030.000000
1030.000000
1030.000000
1030.000000
1030.000000
1030.000000
1030.000000
1030.000000
1030.000000
1030.000000
1030.000000
1030.000000
1030.000000
1030.000000
1030.000000
1030.000000
1030.000000
1030.000000
1030.000000
1030.000000
1030.000000
1030.000000
1030.000000
1030.000000
1030.000000
1030.000000
1030.000000
1030.000000
1030.000000
1030.000000
1030.000000
1030.000000
1030.000000
1030.000000
1030.000000
1030.000000
1030.000000
1030.000000
1030.000000
1030.000000
1030.000000
1030.000000
1030.000000
1030.000000
1030.000000
1030.000000
1030.000000
1030.000000
1030.000000
1030.000000
1030.000000
1030.000000
1030.000000
1030.000000
1030.000000
1030.000000
1030.000000
1030.000000
1030.000000
1030.000000
1030.000000
1030.000000
1030.000000
1030.000000
1030.000000
1030.000000
1030.000000
1030.000000
1030.000000
1030.000000
1030.000000
1030.000000
1030.000000
1030.000000
1030.000000
1030.000000
1030.000000
1030.000000
1030.000000
1030.000000
1030.000000
1030.000000
1030.000000
1030.000000
1030.000000
1030.000000
1030.000000
1030.000000
1030.000000
1030.000000
1030.000000
1030.000000
1030.000000
1030.000000
1030.000000
1030.000000
1030.000000
1030.000000
1030.000000
1030.000000
1030.000000
1030.000000
1030.000000
1030.000000
1030.000000
1030.000000
1030.000000
1030.000000
1030.000000
1030.000000
1030.000000
1030.000000
1030.000000
1030.000000
1030.000000
1030.000000
1030.000000
1030.000000
1030.000000
1030.000000
1030.000000
1030.000000
1030.000000
1030.000000
1030.000000
1030.000000
1030.000000
1030.000000
1030.000000
1030.000000
1030.000000
1030.000000
1030.000000
1030.000000
1030.000000
1030.000000
1030.000000
1030.000000
1030.000000
1030.000000
1030.000000
1030.000000
1030.000000
1030.000000
1030.000000
1030.000000
1030.000000
1030.000000
1030.000000
1030.000000
1030.000000
1030.000000
1030.000000
1030.000000
1030.000000
1030.000000
1030.000000
1030.000000
1030.000000
1030.000000
1030.000000
1030.000000
1030.000000
1030.000000
1030.000000
1030.000000
1030.000000
1030.000000
1030.000000
1030.000000
1030.000000
1030.000000
1030.000000
1030.000000
1030.000000
1030.000000
1030.000000
1030.000000
1030.000000
1030.000000
1030.000000
1030.000000
1030.000000
1030.000000
1030.000000
1030.000000
1030.000000
1030.000000
1030.000000
1030.000000
1030.000000
1030.000000
1030.000000
1030.000000
1030.000000
1030.000000
1030.000000
1030.000000
1030.000000
1030.000000
1030.000000
1030.000000
1030.000000
1030.000000
1030.000000
1030.000000
1030.000000
1030.000000
1030.000000
1030.000000
1030.000000
1030.000000
1030.000000
1030.000000
1030.000000
1030.000000
1030.000000
1030.000000
1030.000000
1030.000000
1030.000000
1030.000000
1030.000000
1030.000000
1030.000000
1030.000000
1030.000000
1030.000000
1030.000000
1030.000000
1030.000000
1030.000000
1030.000000
1030.000000
1030.000000
1030.000000
1030.000000
1030.000000
1030.000000
1030.000000
1030.000000
1030.000000
1030.000000
1030.000000
1030.000000
1030.000000
1030.000000
1030.000000
1030.000000
1030.000000
1030.000000
1030.000000
1030.000000
1030.000000
1030.000000
1030.000000
1030.000000
1030.000000
1030.000000
1030.000000
1030.000000
1030.000000
1030.000000
1030.000000
1030.000000
1030.000000
1030.000000
1030.000000
1030.000000
1030.000000
1030.000000
1030.000000
1030.000000
1030.000000
1030.000000
1030.000000
1030.000000
1030.000000
1030.000000
1030.000000
1030.000000
1030.000000
1030.000000
1030.000000
1030.000000
1030.000000
1030.000000
1030.000000
1030.000000
1030.000000
1030.000000
1030.000000
1030.000000
1030.000000
1030.000000
1030.000000
1030.000000
1030.000000
1030.000000
1030.000000
1030.000000
1030.000000
1030.000000
1030.000000
1030.000000
1030.000000
1030.000000
1030.000000
1030.000000
1030.000000
1030.000000
1030.000000
1030.000000
1030.000000
1030.000000
1030.000000
1030.000000
1030.000000
1030.000000
1030.000000
1030.000000
1030.000000
1030.000000
1030.000000
1030.000000
1030.000000
1030.000000
1030.000000
1030.000000
1030.000000
1030.000000
1030.000000
1030.000000
1030.000000
1030.000000
1030.000000
1030.000000
1030.000000
1030.000000
1030.000000
1030.000000
1030.000000
1030.000000
1030.000000
1030.000000
1030.000000
1030.000000
1030.000000
1030.000000
1030.000000
1030.000000
1030.000000
1030.000000
1030.000000
1030.000000
1030.000000
1030.000000
1030.000000
1030.000000
1030.000000
1030.000000
1030.000000
1030.000000
1030.000000
1030.000000
1030.000000
1030.000000
1030.000000
1030.000000
1030.000000
1030.000000
1030.000000
1030.000000
1030.000000
1030.000000
1030.000000
1030.000000
1030.000000
1030.000000
1030.000000
1030.000000
1030.000000
1030.000000
1030.000000
1030.000000
1030.000000
1030.000000
1030.000000
1030.000000
1030.000000
1030.000000
1030.000000
1030.000000
1030.000000
1030.000000
1030.000000
1030.000000
1030.000000
1030.000000
1030.000000
1030.000000
1030.000000
1030.000000
1030.000000
1030.000000
1030.000000
1030.000000
1030.000000
1030.000000
1030.000000
1030.000000
1030.000000
1030.000000
1030.000000
1030.000000
1030.000000
1030.000000
1030.000000
1030.000000
1030.000000
1030.000000
1030.000000
1030.000000
1030.000000
1030.000000
1030.000000
1030.000000
1030.000000
1030.000000
1030.000000
1030.000000
1030.000000
1030.000000
1030.000000
1030.000000
1030.000000
1030.000000
1030.000000
1030.000000
1030.000000
1030.000000
1030.000000
1030.000000
1030.000000
1030.000000
1030.000000
1030.000000
1030.000000
1030.000000
1030.000000
1030.000000
1030.000000
1030.000000
1030.000000
1030.000000
1030.000000
1030.000000
1030.000000
1030.000000
1030.000000
1030.000000
1030.000000
1030.000000
1030.000000
1030.000000
1030.000000
1030.000000
1030.000000
1030.000000
1030.000000
1030.000000
1030.000000
1030.000000
1030.000000
1030.000000
1030.000000
1030.000000
1030.000000
1030.000000
1030.000000
1030.000000
1030.000000
1030.000000
1030.000000
1030.000000
1030.000000
1030.000000
1030.000000
1030.000000
1030.000000
1030.000000
1030.000000
1030.000000
1030.000000
1030.000000
1030.000000
1030.000000
1030.000000
1030.000000
1030.000000
1030.000000
1030.000000
1030.000000
1030.000000
1030.000000
1030.000000
1030.000000
1030.000000
1030.000000
1030.000000
1030.000000
1030.000000
1030.000000
1030.000000
1030.000000
1030.000000
1030.000000
1030.000000
1030.000000
1030.000000
1030.000000
1030.000000
1030.000000
1030.000000
1030.000000
1030.000000
1030.000000
1030.000000
1030.000000
1030.000000
1030.000000
1030.000000
1030.000000
1030.000000
1030.000000
1030.000000
1030.000000
1030.000000
1030.000000
1030.000000
1030.000000
1030.000000
1030.000000
1030.000000
1030.000000
1030.000000
1030.000000
1030.000000
1030.000000
1030.000000
1030.000000
1030.000000
1030.000000
1030.000000
1030.000000
1030.000000
1030.000000
1030.000000
1030.000000
1030.000000
1030.000000
1030.000000
1030.000000
1030.000000
1030.000000
1030.000000
1030.000000
1030.000000
1030.000000
1030.000000
1030.000000
1030.000000
1030.000000
1030.000000
1030.000000
1030.000000
1030.000000
1030.000000
1030.000000
1030.000000
1030.000000
1030.000000
1030.000000
1030.000000
1030.000000
1030.000000
1030.000000
1030.000000
1030.000000
1030.000000
1030.000000
1030.000000
1030.000000
1030.000000
1030.000000
1030.000000
1030.000000
1030.000000
1030.000000
1030.000000
1030.000000
1030.000000
1030.000000
1030.000000
1030.000000
1030.000000
1030.000000
1030.000000
1030.000000
1030.000000
1030.000000
1030.000000
1030.000000
1030.000000
1030.000000
1030.000000
1030.000000
1030.000000
1030.000000
1030.000000
1030.000000
1030.000000
1030.000000
1030.000000
1030.000000
1030.000000
1030.000000
1030.000000
1030.000000
1030.000000
1030.000000
1030.000000
1030.000000
1030.000000
1030.000000
1030.000000
1030.000000
1030.000000
1030.000000
1030.000000
1030.000000
1030.000000
1030.000000
1030.000000
1030.000000
1030.000000
1030.000000
1030.000000
1030.000000
1030.000000
1030.000000
1030.000000
1030.000000
1030.000000
1030.000000
1030.000000
1030.000000
1030.000000
1030.000000
1030.000000
1030.000000
1030.000000
1030.000000
1030.000000
1030.000000
1030.000000
1030.000000
1030.000000
1030.000000
1030.000000
1030.000000
1030.000000
1030.000000
1030.000000
1030.000000
1030.000000
1030.000000
1030.000000
1030.000000
1030.000000
1030.000000
1030.000000
1030.000000
1030.000000
1030.000000
1030.000000
1030.000000
1030.000000
1030.000000
1030.000000
1030.000000
1030.000000
1030.000000
1030.000000
1030.000000
1030.000000
1030.000000
1030.000000
1030.000000
1030.000000
1030.000000
1030.000000
1030.000000
1030.000000
1030.000000
1030.000000
1030.000000
1030.000000
1030.000000
1030.000000
1030.000000
1030.000000
1030.000000
1030.000000
1030.000000
1030.000000
1030.000000
1030.000000
1030.000000
1030.000000
1030.000000
1030.000000
1030.000000
1030.000000
1030.000000
1030.000000
1030.000000
1030.000000
1030.000000
1030.000000
1030.000000
1030.000000
1030.000000
1030.000000
1030.000000
1030.000000
1030.000000
1030.000000
1030.000000
1030.000000
1030.000000
1030.000000
1030.000000
1030.000000
1030.000000
1030.000000
1030.000000
1030.000000
1030.000000
1030.000000
1030.000000
1030.000000
1030.000000
1030.000000
1030.000000
1030.000000
1030.000000
1030.000000
1030.000000
1030.000000
1030.000000
1030.000000
1030.000000
1030.000000
1030.000000
1030.000000
1030.000000
1030.000000
1030.000000
1030.000000
1030.000000
1030.000000
1030.000000
1030.000000
1030.000000
1030.000000
1030.000000
1030.000000
1030.000000
1030.000000
1030.000000
1030.000000
1030.000000
1030.000000
1030.000000
1030.000000
1030.000000
1030.000000
1030.000000
1030.000000
1030.000000
1030.000000
1030.000000
1030.000000
1030.000000
1030.000000
1030.000000
1030.000000
1030.000000
1030.000000
1030.000000
1030.000000
1030.000000
1030.000000
1030.000000
1030.000000
1030.000000
1030.000000
1030.000000
1030.000000
1030.000000
1030.000000
1030.000000
1030.000000
1030.000000
1030.000000
1030.000000
1030.000000
1030.000000
1030.000000
1030.000000
1030.000000
1030.000000
1030.000000
1030.000000
1030.000000
1030.000000
1030.000000
1030.000000
1030.000000
1030.000000
1030.000000
1030.000000
1030.000000
1030.000000
1030.000000
1030.000000
1030.000000
1030.000000
1030.000000
1030.000000
1030.000000
1030.000000
1030.000000
1030.000000
1030.000000
1030.000000
1030.000000
1030.000000
1030.000000
1030.000000
1030.000000
1030.000000
1030.000000
1030.000000
1030.000000
1030.000000
1030.000000
1030.000000
1030.000000
1030.000000
1030.000000
1030.000000
1030.000000
1030.000000
1030.000000
1030.000000
1030.000000
1030.000000
1030.000000
1030.000000
1030.000000
1030.000000
1030.000000
1030.000000
1030.000000
1030.000000
1030.000000
1030.000000
1030.000000
1030.000000
1030.000000
1030.000000
1030.000000
1030.000000
1030.000000
1030.000000
1030.000000
1030.000000
1030.000000
1030.000000
1030.000000
1030.000000
1030.000000
1030.000000
1030.000000
1030.000000
1030.000000
1030.000000
1030.000000
1030.000000
1030.000000
1030.000000
1030.000000
1030.000000
1030.000000
1030.000000
1030.000000
1030.000000
1030.000000
1030.000000
1030.000000
1030.000000
1030.000000
1030.000000
1030.000000
1030.000000
1030.000000
1030.000000
1030.000000
1030.000000
1030.000000
1030.000000
1030.000000
1030.000000
1030.000000
1030.000000
1030.000000
1030.000000
1030.000000
1030.000000
1030.000000
1030.000000
1030.000000
1030.000000
1030.000000
1030.000000
1030.000000
1030.000000
1030.000000
1030.000000
1030.000000
1030.000000
1030.000000
1030.000000
1030.000000
1030.000000
1030.000000
1030.000000
1030.000000
1030.000000
1030.000000
1030.000000
1030.000000
1030.000000
1030.000000
1030.000000
1030.000000
1030.000000
1030.000000
1030.000000
1030.000000
1030.000000
1030.000000
1030.000000
1030.000000
1030.000000
1030.000000
1030.000000
1030.000000
1030.000000
1030.000000
1030.000000
1030.000000
1030.000000
1030.000000
1030.000000
1030.000000
1030.000000
1030.000000
1030.000000
1030.000000
1030.000000
1030.000000
1030.000000
1030.000000
1030.000000
1030.000000
1030.000000
1030.000000
1030.000000
1030.000000
1030.000000
1030.000000
1030.000000
1030.000000
1030.000000
1030.000000
1030.000000
1030.000000
1030.000000
1030.000000
1030.000000
1030.000000
1030.000000
1030.000000
1030.000000
1030.000000
1030.000000
1030.000000
1030.000000
1030.000000
1030.000000
1030.000000
1030.000000
1030.000000
1030.000000
1030.000000
1030.000000
1030.000000
1030.000000
1030.000000
1030.000000
1030.000000
1030.000000
1030.000000
1030.000000
1030.000000
1030.000000
1030.000000
1030.000000
1030.000000
1030.000000
1030.000000
1030.000000
1030.000000
1030.000000
1030.000000
1030.000000
1030.000000
1030.000000
1030.000000
1030.000000
1030.000000
1030.000000
1030.000000
1030.000000
1030.000000
1030.000000
1030.000000
1030.000000
1030.000000
1030.000000
1030.000000
1030.000000
1030.000000
1030.000000
1030.000000
1030.000000
1030.000000
1030.000000
1030.000000
1030.000000
1030.000000
1030.000000
1030.000000
1030.000000
1030.000000
1030.000000
1030.000000
1030.000000
1030.000000
1030.000000
1030.000000
1030.000000
1030.000000
1030.000000
1030.000000
1030.000000
1030.000000
1030.000000
1030.000000
1030.000000
1030.000000
1030.000000
1030.000000
1030.000000
1030.000000
1030.000000
1030.000000
1030.000000
1030.000000
1030.000000
1030.000000
1030.000000
1030.000000
1030.000000
1030.000000
1030.000000
1030.000000
1030.000000
1030.000000
1030.000000
1030.000000
1030.000000
1030.000000
1030.000000
1030.000000
1030.000000
1030.000000
1030.000000
1030.000000
1030.000000
1030.000000
1030.000000
1030.000000
1030.000000
1030.000000
1030.000000
1030.000000
1030.000000
1030.000000
1030.000000
1030.000000
1030.000000
1030.000000
1030.000000
1030.000000
1030.000000
1030.000000
1030.000000
1030.000000
1030.000000
1030.000000
1030.000000
1030.000000
1030.000000
1030.000000
1030.000000
1030.000000
1030.000000
1030.000000
1030.000000
1030.000000
1030.000000
1030.000000
1030.000000
1030.000000
1030.000000
1030.000000
1030.000000
1030.000000
1030.000000
1030.000000
1030.000000
1030.000000
1030.000000
1030.000000
1030.000000
1030.000000
1030.000000
1030.000000
1030.000000
1030.000000
1030.000000
1030.000000
1030.000000
1030.000000
1030.000000
1030.000000
1030.000000
1030.000000
1030.000000
1030.000000
1030.000000
1030.000000
1030.000000
1030.000000
1030.000000
1030.000000
1030.000000
1030.000000
1030.000000
1030.000000
1030.000000
1030.000000
1030.000000
1030.000000
1030.000000
1030.000000
1030.000000
1030.000000
1030.000000
1030.000000
1030.000000
1030.000000
1030.000000
1030.000000
1030.000000
1030.000000
1030.000000
1030.000000
1030.000000
1030.000000
1030.000000
1030.000000
1030.000000
1030.000000
1030.000000
1030.000000
1030.000000
1030.000000
1030.000000
1030.000000
1030.000000
1030.000000
1030.000000
1030.000000
1030.000000
1030.000000
1030.000000
1030.000000
1030.000000
1030.000000
1030.000000
1030.000000
1030.000000
1030.000000
1030.000000
1030.000000
1030.000000
1030.000000
1030.000000
1030.000000
1030.000000
1030.000000
1030.000000
1030.000000
1030.000000
1030.000000
1030.000000
1030.000000
1030.000000
1030.000000
1030.000000
1030.000000
1030.000000
1030.000000
1030.000000
1030.000000
1030.000000
1030.000000
1030.000000
1030.000000
1030.000000
1030.000000
1030.000000
1030.000000
1030.000000
1030.000000
1030.000000
1030.000000
1030.000000
1030.000000
1030.000000
1030.000000
1030.000000
1030.000000
1030.000000
1030.000000
1030.000000
1030.000000
1030.000000
1030.000000
1030.000000
1030.000000
1030.000000
1030.000000
1030.000000
1030.000000
1030.000000
1030.000000
1030.000000
1030.000000
1030.000000
1030.000000
1030.000000
1030.000000
1030.000000
1030.000000
1030.000000
1030.000000
1030.000000
1030.000000
1030.000000
1030.000000
1030.000000
1030.000000
1030.000000
1030.000000
1030.000000
1030.000000
1030.000000
1030.000000
1030.000000
1030.000000
1030.000000
1030.000000
1030.000000
1030.000000
1030.000000
1030.000000
1030.000000
1030.000000
1030.000000
1030.000000
1030.000000
1030.000000
1030.000000
1030.000000
1030.000000
1030.000000
1030.000000
1030.000000
1030.000000
1030.000000
1030.000000
1030.000000
1030.000000
1030.000000
1030.000000
1030.000000
1030.000000
1030.000000
1030.000000
1030.000000
1030.000000
1030.000000
1030.000000
1030.000000
1030.000000
1030.000000
1030.000000
1030.000000
1030.000000
1030.000000
1030.000000
1030.000000
1030.000000
1030.000000
1030.000000
1030.000000
1030.000000
1030.000000
1030.000000
1030.000000
1030.000000
1030.000000
1030.000000
1030.000000
1030.000000
1030.000000
1030.000000
1030.000000
1030.000000
1030.000000
1030.000000
1030.000000
1030.000000
1030.000000
1030.000000
1030.000000
1030.000000
1030.000000
1030.000000
1030.000000
1030.000000
1030.000000
1030.000000
1030.000000
1030.000000
1030.000000
1030.000000
1030.000000
1030.000000
1030.000000
1030.000000
1030.000000
1030.000000
1030.000000
1030.000000
1030.000000
1030.000000
1030.000000
1030.000000
1030.000000
1030.000000
1030.000000
1030.000000
1030.000000
1030.000000
1030.000000
1030.000000
1030.000000
1030.000000
1030.000000
1030.000000
1030.000000
1030.000000
1030.000000
1030.000000
1030.000000
1030.000000
1030.000000
1030.000000
1030.000000
1030.000000
1030.000000
1030.000000
1030.000000
1030.000000
1030.000000
1030.000000
1030.000000
1030.000000
1030.000000
1030.000000
1030.000000
1030.000000
1030.000000
1030.000000
1030.000000
1030.000000
1030.000000
1030.000000
1030.000000
1030.000000
1030.000000
1030.000000
1030.000000
1030.000000
1030.000000
1030.000000
1030.000000
1030.000000
1030.000000
1030.000000
1030.000000
1030.000000
1030.000000
1030.000000
1030.000000
1030.000000
1030.000000
1030.000000
1030.000000
1030.000000
1030.000000
1030.000000
1030.000000
1030.000000
1030.000000
1030.000000
1030.000000
1030.000000
1030.000000
1030.000000
1030.000000
1030.000000
1030.000000
1030.000000
1030.000000
1030.000000
1030.000000
1030.000000
1030.000000
1030.000000
1030.000000
1030.000000
1030.000000
1030.000000
1030.000000
1030.000000
1030.000000
1030.000000
1030.000000
1030.000000
1030.000000
1030.000000
1030.000000
1030.000000
1030.000000
1030.000000
1030.000000
1030.000000
1030.000000
1030.000000
1030.000000
1030.000000
1030.000000
1030.000000
1030.000000
1030.000000
1030.000000
1030.000000
1030.000000
1030.000000
1030.000000
1030.000000
1030.000000
1030.000000
1030.000000
1030.000000
1030.000000
1030.000000
1030.000000
1030.000000
1030.000000
1030.000000
1030.000000
1030.000000
1030.000000
1030.000000
1030.000000
1030.000000
1030.000000
1030.000000
1030.000000
1030.000000
1030.000000
1030.000000
1030.000000
1030.000000
1030.000000
1030.000000
1030.000000
1030.000000
1030.000000
1030.000000
1030.000000
1030.000000
1030.000000
1030.000000
1030.000000
1030.000000
1030.000000
1030.000000
1030.000000
1030.000000
1030.000000
1030.000000
1030.000000
1030.000000
1030.000000
1030.000000
1030.000000
1030.000000
1030.000000
1030.000000
1030.000000
1030.000000
1030.000000
1030.000000
1030.000000
1030.000000
1030.000000
1030.000000
1030.000000
1030.000000
1030.000000
1030.000000
1030.000000
1030.000000
1030.000000
1030.000000
1030.000000
1030.000000
1030.000000
1030.000000
1030.000000
1030.000000
1030.000000
1030.000000
1030.000000
1030.000000
1030.000000
1030.000000
1030.000000
1030.000000
1030.000000
1030.000000
1030.000000
1030.000000
1030.000000
1030.000000
1030.000000
1030.000000
1030.000000
1030.000000
1030.000000
1030.000000
1030.000000
1030.000000
1030.000000
1030.000000
1030.000000
1030.000000
1030.000000
1030.000000
1030.000000
1030.000000
1030.000000
1030.000000
1030.000000
1030.000000
1030.000000
1030.000000
1030.000000
1030.000000
1030.000000
1030.000000
1030.000000
1030.000000
1030.000000
1030.000000
1030.000000
1030.000000
1030.000000
1030.000000
1030.000000
1030.000000
1030.000000
1030.000000
1030.000000
1030.000000
1030.000000
1030.000000
1030.000000
1030.000000
1030.000000
1030.000000
1030.000000
1030.000000
1030.000000
1030.000000
1030.000000
1030.000000
1030.000000
1030.000000
1030.000000
1030.000000
1030.000000
1030.000000
1030.000000
1030.000000
1030.000000
1030.000000
1030.000000
1030.000000
1030.000000
1030.000000
1030.000000
1030.000000
1030.000000
1030.000000
1030.000000
1030.000000
1030.000000
1030.000000
1030.000000
1030.000000
1030.000000
1030.000000
1030.000000
1030.000000
1030.000000
1030.000000
1030.000000
1030.000000
1030.000000
1030.000000
1030.000000
1030.000000
1030.000000
1030.000000
1030.000000
1030.000000
1030.000000
1030.000000
1030.000000
1030.000000
1030.000000
1030.000000
1030.000000
1030.000000
1030.000000
1030.000000
1030.000000
1030.000000
1030.000000
1030.000000
1030.000000
1030.000000
1030.000000
1030.000000
1030.000000
1030.000000
1030.000000
1030.000000
1030.000000
1030.000000
1030.000000
1030.000000
1030.000000
1030.000000
1030.000000
1030.000000
1030.000000
1030.000000
1030.000000
1030.000000
1030.000000
1030.000000
1030.000000
1030.000000
1030.000000
1030.000000
1030.000000
1030.000000
1030.000000
1030.000000
1030.000000
1030.000000
1030.000000
1030.000000
1030.000000
1030.000000
1030.000000
1030.000000
1030.000000
1030.000000
1030.000000
1030.000000
1030.000000
1030.000000
1030.000000
1030.000000
1030.000000
1030.000000
1030.000000
1030.000000
1030.000000
1030.000000
1030.000000
1030.000000
1030.000000
1030.000000
1030.000000
1030.000000
1030.000000
1030.000000
1030.000000
1030.000000
1030.000000
1030.000000
1030.000000
1030.000000
1030.000000
1030.000000
1030.000000
1030.000000
1030.000000
1030.000000
1030.000000
1030.000000
1030.000000
1030.000000
1030.000000
1030.000000
1030.000000
1030.000000
1030.000000
1030.000000
1030.000000
1030.000000
1030.000000
1030.000000
1030.000000
1030.000000
1030.000000
1030.000000
1030.000000
1030.000000
1030.000000
1030.000000
1030.000000
1030.000000
1030.000000
1030.000000
1030.000000
1030.000000
1030.000000
1030.000000
1030.000000
1030.000000
1030.000000
1030.000000
1030.000000
1030.000000
1030.000000
1030.000000
1030.000000
1030.000000
1030.000000
1030.000000
1030.000000
1030.000000
1030.000000
1030.000000
1030.000000
1030.000000
1030.000000
1030.000000
1030.000000
1030.000000
1030.000000
1030.000000
1030.000000
1030.000000
1030.000000
1030.000000
1030.000000
1030.000000
1030.000000
1030.000000
1030.000000
1030.000000
1030.000000
1030.000000
1030.000000
1030.000000
1030.000000
1030.000000
1030.000000
1030.000000
1030.000000
1030.000000
1030.000000
1030.000000
1030.000000
1030.000000
1030.000000
1030.000000
1030.000000
1030.000000
1030.000000
1030.000000
1030.000000
1030.000000
1030.000000
1030.000000
1030.000000
1030.000000
1030.000000
1030.000000
1030.000000
1030.000000
1030.000000
1030.000000
1030.000000
1030.000000
1030.000000
1030.000000
1030.000000
1030.000000
1030.000000
1030.000000
1030.000000
1030.000000
1030.000000
1030.000000
1030.000000
1030.000000
1030.000000
1030.000000
1030.000000
1030.000000
1030.000000
1030.000000
1030.000000
1030.000000
1030.000000
1030.000000
1030.000000
1030.000000
1030.000000
1030.000000
1030.000000
1030.000000
1030.000000
1030.000000
1030.000000
1030.000000
1030.000000
1030.000000
1030.000000
1030.000000
1030.000000
1030.000000
1030.000000
1030.000000
1030.000000
1030.000000
1030.000000
1030.000000
1030.000000
1030.000000
1030.000000
1030.000000
1030.000000
1030.000000
1030.000000
1030.000000
1030.000000
1030.000000
1030.000000
1030.000000
1030.000000
1030.000000
1030.000000
1030.000000
1030.000000
1030.000000
1030.000000
1030.000000
1030.000000
1030.000000
1030.000000
1030.000000
1030.000000
1030.000000
1030.000000
1030.000000
1030.000000
1030.000000
1030.000000
1030.000000
1030.000000
1030.000000
1030.000000
1030.000000
1030.000000
1030.000000
1030.000000
1030.000000
1030.000000
1030.000000
1030.000000
1030.000000
1030.000000
1030.000000
1030.000000
1030.000000
1030.000000
1030.000000
1030.000000
1030.000000
1030.000000
1030.000000
1030.000000
1030.000000
1030.000000
1030.000000
1030.000000
1030.000000
1030.000000
1030.000000
1030.000000
1030.000000
1030.000000
1030.000000
1030.000000
1030.000000
1030.000000
1030.000000
1030.000000
1030.000000
1030.000000
1030.000000
1030.000000
1030.000000
1030.000000
1030.000000
1030.000000
1030.000000
1030.000000
1030.000000
1030.000000
1030.000000
1030.000000
1030.000000
1030.000000
1030.000000
1030.000000
1030.000000
1030.000000
1030.000000
1030.000000
1030.000000
1030.000000
1030.000000
1030.000000
1030.000000
1030.000000
1030.000000
1030.000000
1030.000000
1030.000000
1030.000000
1030.000000
1030.000000
1030.000000
1030.000000
1030.000000
1030.000000
1030.000000
1030.000000
1030.000000
1030.000000
1030.000000
1030.000000
1030.000000
1030.000000
1030.000000
1030.000000
1030.000000
1030.000000
1030.000000
1030.000000
1030.000000
1030.000000
1030.000000
1030.000000
1030.000000
1030.000000
1030.000000
1030.000000
1030.000000
1030.000000
1030.000000
1030.000000
1030.000000
1030.000000
1030.000000
1030.000000
1030.000000
1030.000000
1030.000000
1030.000000
1030.000000
1030.000000
1030.000000
1030.000000
1030.000000
1030.000000
1030.000000
1030.000000
1030.000000
1030.000000
1030.000000
1030.000000
1030.000000
1030.000000
1030.000000
1030.000000
1030.000000
1030.000000
1030.000000
1030.000000
1030.000000
1030.000000
1030.000000
1030.000000
1030.000000
1030.000000
1030.000000
1030.000000
1030.000000
1030.000000
1030.000000
1030.000000
1030.000000
1030.000000
1030.000000
1030.000000
1030.000000
1030.000000
1030.000000
1030.000000
1030.000000
1030.000000
1030.000000
1030.000000
1030.000000
1030.000000
1030.000000
1030.000000
1030.000000
1030.000000
1030.000000
1030.000000
1030.000000
1030.000000
1030.000000
1030.000000
1030.000000
1030.000000
1030.000000
1030.000000
1030.000000
1030.000000
1030.000000
1030.000000
1030.000000
1030.000000
1030.000000
1030.000000
1030.000000
1030.000000
1030.000000
1030.000000
1030.000000
1030.000000
1030.000000
1030.000000
1030.000000
1030.000000
1030.000000
1030.000000
1030.000000
1030.000000
1030.000000
1030.000000
1030.000000
1030.000000
1030.000000
1030.000000
1030.000000
1030.000000
1030.000000
1030.000000
1030.000000
1030.000000
1030.000000
1030.000000
1030.000000
1030.000000
1030.000000
1030.000000
1030.000000
1030.000000
1030.000000
1030.000000
1030.000000
1030.000000
1030.000000
1030.000000
1030.000000
1030.000000
1030.000000
1030.000000
1030.000000
1030.000000
1030.000000
1030.000000
1030.000000
1030.000000
1030.000000
1030.000000
1030.000000
1030.000000
1030.000000
1030.000000
1030.000000
1030.000000
1030.000000
1030.000000
1030.000000
1030.000000
1030.000000
1030.000000
1030.000000
1030.000000
1030.000000
1030.000000
1030.000000
1030.000000
1030.000000
1030.000000
1030.000000
1030.000000
1030.000000
1030.000000
1030.000000
1030.000000
1030.000000
1030.000000
1030.000000
1030.000000
1030.000000
1030.000000
1030.000000
1030.000000
1030.000000
1030.000000
1030.000000
1030.000000
1030.000000
1030.000000
1030.000000
1030.000000
1030.000000
1030.000000
1030.000000
1030.000000
1030.000000
1030.000000
1030.000000
1030.000000
1030.000000
1030.000000
1030.000000
1030.000000
1030.000000
1030.000000
1030.000000
1030.000000
1030.000000
1030.000000
1030.000000
1030.000000
1030.000000
1030.000000
1030.000000
1030.000000
1030.000000
1030.000000
1030.000000
1030.000000
1030.000000
1030.000000
1030.000000
1030.000000
1030.000000
1030.000000
1030.000000
1030.000000
1030.000000
1030.000000
1030.000000
1030.000000
1030.000000
1030.000000
1030.000000
1030.000000
1030.000000
1030.000000
1030.000000
1030.000000
1030.000000
1030.000000
1030.000000
1030.000000
1030.000000
1030.000000
1030.000000
1030.000000
1030.000000
1030.000000
1030.000000
1030.000000
1030.000000
1030.000000
1030.000000
1030.000000
1030.000000
1030.000000
1030.000000
1030.000000
1030.000000
1030.000000
1030.000000
1030.000000
1030.000000
1030.000000
1030.000000
1030.000000
1030.000000
1030.000000
1030.000000
1030.000000
1030.000000
1030.000000
1030.000000
1030.000000
1030.000000
1030.000000
1030.000000
1030.000000
1030.000000
1030.000000
1030.000000
1030.000000
1030.000000
1030.000000
1030.000000
1030.000000
1030.000000
1030.000000
1030.000000
1030.000000
1030.000000
1030.000000
1030.000000
1030.000000
1030.000000
1030.000000
1030.000000
1030.000000
1030.000000
1030.000000
1030.000000
1030.000000
1030.000000
1030.000000
1030.000000
1030.000000
1030.000000
1030.000000
1030.000000
1030.000000
1030.000000
1030.000000
1030.000000
1030.000000
1030.000000
1030.000000
1030.000000
1030.000000
1030.000000
1030.000000
1030.000000
1030.000000
1030.000000
1030.000000
1030.000000
1030.000000
1030.000000
1030.000000
1030.000000
1030.000000
1030.000000
1030.000000
1030.000000
1030.000000
1030.000000
1030.000000
1030.000000
1030.000000
1030.000000
1030.000000
1030.000000
1030.000000
1030.000000
1030.000000
1030.000000
1030.000000
1030.000000
1030.000000
1030.000000
1030.000000
1030.000000
1030.000000
1030.000000
1030.000000
1030.000000
1030.000000
1030.000000
1030.000000
1030.000000
1030.000000
1030.000000
1030.000000
1030.000000
1030.000000
1030.000000
1030.000000
1030.000000
1030.000000
1030.000000
1030.000000
1030.000000
1030.000000
1030.000000
1030.000000
1030.000000
1030.000000
1030.000000
1030.000000
1030.000000
1030.000000
1030.000000
1030.000000
1030.000000
1030.000000
1030.000000
1030.000000
1030.000000
1030.000000
1030.000000
1030.000000
1030.000000
1030.000000
1030.000000
1030.000000
1030.000000
1030.000000
1030.000000
1030.000000
1030.000000
1030.000000
1030.000000
1030.000000
1030.000000
1030.000000
1030.000000
1030.000000
1030.000000
1030.000000
1030.000000
1030.000000
1030.000000
1030.000000
1030.000000
1030.000000
1030.000000
1030.000000
1030.000000
1030.000000
1030.000000
1030.000000
1030.000000
1030.000000
1030.000000
1030.000000
1030.000000
1030.000000
1030.000000
1030.000000
1030.000000
1030.000000
1030.000000
1030.000000
1030.000000
1030.000000
1030.000000
1030.000000
1030.000000
1030.000000
1030.000000
1030.000000
1030.000000
1030.000000
1030.000000
1030.000000
1030.000000
1030.000000
1030.000000
1030.000000
1030.000000
1030.000000
1030.000000
1030.000000
1030.000000
1030.000000
1030.000000
1030.000000
1030.000000
1030.000000
1030.000000
1030.000000
1030.000000
1030.000000
1030.000000
1030.000000
1030.000000
1030.000000
1030.000000
1030.000000
1030.000000
1030.000000
1030.000000
1030.000000
1030.000000
1030.000000
1030.000000
1030.000000
1030.000000
1030.000000
1030.000000
1030.000000
1030.000000
1030.000000
1030.000000
1030.000000
1030.000000
1030.000000
1030.000000
1030.000000
1030.000000
1030.000000
1030.000000
1030.000000
1030.000000
1030.000000
1030.000000
1030.000000
1030.000000
1030.000000
1030.000000
1030.000000
1030.000000
1030.000000
1030.000000
1030.000000
1030.000000
1030.000000
1030.000000
1030.000000
1030.000000
1030.000000
1030.000000
1030.000000
1030.000000
1030.000000
1030.000000
1030.000000
1030.000000
1030.000000
1030.000000
1030.000000
1030.000000
1030.000000
1030.000000
1030.000000
1030.000000
1030.000000
1030.000000
1030.000000
1030.000000
1030.000000
1030.000000
1030.000000
1030.000000
1030.000000
1030.000000
1030.000000
1030.000000
1030.000000
1030.000000
1030.000000
1030.000000
1030.000000
1030.000000
1030.000000
1030.000000
1030.000000
1030.000000
1030.000000
1030.000000
1030.000000
1030.000000
1030.000000
1030.000000
1030.000000
1030.000000
1030.000000
1030.000000
1030.000000
1030.000000
1030.000000
1030.000000
1030.000000
1030.000000
1030.000000
1030.000000
1030.000000
1030.000000
1030.000000
1030.000000
1030.000000
1030.000000
1030.000000
1030.000000
1030.000000
1030.000000
1030.000000
1030.000000
1030.000000
1030.000000
1030.000000
1030.000000
1030.000000
1030.000000
1030.000000
1030.000000
1030.000000
1030.000000
1030.000000
1030.000000
1030.000000
1030.000000
1030.000000
1030.000000
1030.000000
1030.000000
1030.000000
1030.000000
1030.000000
1030.000000
1030.000000
1030.000000
1030.000000
1030.000000
1030.000000
1030.000000
1030.000000
1030.000000
1030.000000
1030.000000
1030.000000
1030.000000
1030.000000
1030.000000
1030.000000
1030.000000
1030.000000
1030.000000
1030.000000
1030.000000
1030.000000
1030.000000
1030.000000
1030.000000
1030.000000
1030.000000
1030.000000
1030.000000
1030.000000
1030.000000
1030.000000
1030.000000
1030.000000
1030.000000
1030.000000
1030.000000
1030.000000
1030.000000
1030.000000
1030.000000
1030.000000
1030.000000
1030.000000
1030.000000
1030.000000
1030.000000
1030.000000
1030.000000
1030.000000
1030.000000
1030.000000
1030.000000
1030.000000
1030.000000
1030.000000
1030.000000
1030.000000
1030.000000
1030.000000
1030.000000
1030.000000
1030.000000
1030.000000
1030.000000
1030.000000
1030.000000
1030.000000
1030.000000
1030.000000
1030.000000
1030.000000
1030.000000
1030.000000
1030.000000
1030.000000
1030.000000
1030.000000
1030.000000
1030.000000
1030.000000
1030.000000
1030.000000
1030.000000
1030.000000
1030.000000
1030.000000
1030.000000
1030.000000
1030.000000
1030.000000
1030.000000
1030.000000
1030.000000
1030.000000
1030.000000
1030.000000
1030.000000
1030.000000
1030.000000
1030.000000
1030.000000
1030.000000
1030.000000
1030.000000
1030.000000
1030.000000
1030.000000
1030.000000
1030.000000
1030.000000
1030.000000
1030.000000
1030.000000
1030.000000
1030.000000
1030.000000
1030.000000
1030.000000
1030.000000
1030.000000
1030.000000
1030.000000
1030.000000
1030.000000
1030.000000
1030.000000
1030.000000
1030.000000
1030.000000
1030.000000
1030.000000
1030.000000
1030.000000
1030.000000
1030.000000
1030.000000
1030.000000
1030.000000
1030.000000
1030.000000
1030.000000
1030.000000
1030.000000
1030.000000
1030.000000
1030.000000
1030.000000
1030.000000
1030.000000
1030.000000
1030.000000
1030.000000
1030.000000
1030.000000
1030.000000
1030.000000
1030.000000
1030.000000
1030.000000
1030.000000
1030.000000
1030.000000
1030.000000
1030.000000
1030.000000
1030.000000
1030.000000
1030.000000
1030.000000
1030.000000
1030.000000
1030.000000
1030.000000
1030.000000
1030.000000
1030.000000
1030.000000
1030.000000
1030.000000
1030.000000
1030.000000
1030.000000
1030.000000
1030.000000
1030.000000
1030.000000
1030.000000
1030.000000
1030.000000
1030.000000
1030.000000
1030.000000
1030.000000
1030.000000
1030.000000
1030.000000
1030.000000
1030.000000
1030.000000
1030.000000
1030.000000
1030.000000
1030.000000
1030.000000
1030.000000
1030.000000
1030.000000
1030.000000
1030.000000
1030.000000
1030.000000
1030.000000
1030.000000
1030.000000
1030.000000
1030.000000
1030.000000
1030.000000
1030.000000
1030.000000
1030.000000
1030.000000
1030.000000
1030.000000
1030.000000
1030.000000
1030.000000
1030.000000
1030.000000
1030.000000
1030.000000
1030.000000
1030.000000
1030.000000
1030.000000
1030.000000
1030.000000
1030.000000
1030.000000
1030.000000
1030.000000
1030.000000
1030.000000
1030.000000
1030.000000
1030.000000
1030.000000
1030.000000
1030.000000
1030.000000
1030.000000
1030.000000
1030.000000
1030.000000
1030.000000
1030.000000
1030.000000
1030.000000
1030.000000
1030.000000
1030.000000
1030.000000
1030.000000
1030.000000
1030.000000
1030.000000
1030.000000
1030.000000
1030.000000
1030.000000
1030.000000
1030.000000
1030.000000
1030.000000
1030.000000
1030.000000
1030.000000
1030.000000
1030.000000
1030.000000
1030.000000
1030.000000
1030.000000
1030.000000
1030.000000
1030.000000
1030.000000
1030.000000
1030.000000
1030.000000
1030.000000
1030.000000
1030.000000
1030.000000
1030.000000
1030.000000
1030.000000
1030.000000
1030.000000
1030.000000
1030.000000
1030.000000
1030.000000
1030.000000
1030.000000
1030.000000
1030.000000
1030.000000
1030.000000
1030.000000
1030.000000
1030.000000
1030.000000
1030.000000
1030.000000
1030.000000
1030.000000
1030.000000
1030.000000
1030.000000
1030.000000
1030.000000
1030.000000
1030.000000
1030.000000
1030.000000
1030.000000
1030.000000
1030.000000
1030.000000
1030.000000
1030.000000
1030.000000
1030.000000
1030.000000
1030.000000
1030.000000
1030.000000
1030.000000
1030.000000
1030.000000
1030.000000
1030.000000
1030.000000
1030.000000
1030.000000
1030.000000
1030.000000
1030.000000
1030.000000
1030.000000
1030.000000
1030.000000
1030.000000
1030.000000
1030.000000
1030.000000
1030.000000
1030.000000
1030.000000
1030.000000
1030.000000
1030.000000
1030.000000
1030.000000
1030.000000
1030.000000
1030.000000
1030.000000
1030.000000
1030.000000
1030.000000
1030.000000
1030.000000
1030.000000
1030.000000
1030.000000
1030.000000
1030.000000
1030.000000
1030.000000
1030.000000
1030.000000
1030.000000
1030.000000
1030.000000
1030.000000
1030.000000
1030.000000
1030.000000
1030.000000
1030.000000
1030.000000
1030.000000
1030.000000
1030.000000
1030.000000
1030.000000
1030.000000
1030.000000
1030.000000
1030.000000
1030.000000
1030.000000
1030.000000
1030.000000
1030.000000
1030.000000
1030.000000
1030.000000
1030.000000
1030.000000
1030.000000
1030.000000
1030.000000
1030.000000
1030.000000
1030.000000
1030.000000
1030.000000
1030.000000
1030.000000
1030.000000
1030.000000
1030.000000
1030.000000
1030.000000
1030.000000
1030.000000
1030.000000
1030.000000
1030.000000
1030.000000
1030.000000
1030.000000
1030.000000
1030.000000
1030.000000
1030.000000
1030.000000
1030.000000
1030.000000
1030.000000
1030.000000
1030.000000
1030.000000
1030.000000
1030.000000
1030.000000
1030.000000
1030.000000
1030.000000
1030.000000
1030.000000
1030.000000
1030.000000
1030.000000
1030.000000
1030.000000
1030.000000
1030.000000
1030.000000
1030.000000
1030.000000
1030.000000
1030.000000
1030.000000
1030.000000
1030.000000
1030.000000
1030.000000
1030.000000
1030.000000
1030.000000
1030.000000
1030.000000
1030.000000
1030.000000
1030.000000
1030.000000
1030.000000
1030.000000
1030.000000
1030.000000
1030.000000
1030.000000
1030.000000
1030.000000
1030.000000
1030.000000
1030.000000
1030.000000
1030.000000
1030.000000
1030.000000
1030.000000
1030.000000
1030.000000
1030.000000
1030.000000
1030.000000
1030.000000
1030.000000
1030.000000
1030.000000
1030.000000
1030.000000
1030.000000
1030.000000
1030.000000
1030.000000
1030.000000
1030.000000
1030.000000
1030.000000
1030.000000
1030.000000
1030.000000
1030.000000
1030.000000
1030.000000
1030.000000
1030.000000
1030.000000
1030.000000
1030.000000
1030.000000
1030.000000
1030.000000
1030.000000
1030.000000
1030.000000
1030.000000
1030.000000
1030.000000
1030.000000
1030.000000
1030.000000
1030.000000
1030.000000
1030.000000
1030.000000
1030.000000
1030.000000
1030.000000
1030.000000
1030.000000
1030.000000
1030.000000
1030.000000
1030.000000
1030.000000
1030.000000
1030.000000
1030.000000
1030.000000
1030.000000
1030.000000
1030.000000
1030.000000
1030.000000
1030.000000
1030.000000
1030.000000
1030.000000
1030.000000
1030.000000
1030.000000
1030.000000
1030.000000
1030.000000
1030.000000
1030.000000
1030.000000
1030.000000
1030.000000
1030.000000
1030.000000
1030.000000
1030.000000
1030.000000
1030.000000
1030.000000
1030.000000
1030.000000
1030.000000
1030.000000
1030.000000
1030.000000
1030.000000
1030.000000
1030.000000
1030.000000
1030.000000
1030.000000
1030.000000
1030.000000
1030.000000
1030.000000
1030.000000
1030.000000
1030.000000
1030.000000
1030.000000
1030.000000
1030.000000
1030.000000
1030.000000
1030.000000
1030.000000
1030.000000
1030.000000
1030.000000
1030.000000
1030.000000
1030.000000
1030.000000
1030.000000
1030.000000
1030.000000
1030.000000
1030.000000
1030.000000
1030.000000
1030.000000
1030.000000
1030.000000
1030.000000
1030.000000
1030.000000
1030.000000
1030.000000
1030.000000
1030.000000
1030.000000
1030.000000
1030.000000
1030.000000
1030.000000
1030.000000
1030.000000
1030.000000
1030.000000
1030.000000
1030.000000
1030.000000
1030.000000
1030.000000
1030.000000
1030.000000
1030.000000
1030.000000
1030.000000
1030.000000
1030.000000
1030.000000
1030.000000
1030.000000
1030.000000
1030.000000
1030.000000
1030.000000
1030.000000
1030.000000
1030.000000
1030.000000
1030.000000
1030.000000
1030.000000
1030.000000
1030.000000
1030.000000
1030.000000
1030.000000
1030.000000
1030.000000
1030.000000
1030.000000
1030.000000
1030.000000
1030.000000
1030.000000
1030.000000
1030.000000
1030.000000
1030.000000
1030.000000
1030.000000
1030.000000
1030.000000
1030.000000
1030.000000
1030.000000
1030.000000
1030.000000
1030.000000
1030.000000
1030.000000
1030.000000
1030.000000
1030.000000
1030.000000
1030.000000
1030.000000
1030.000000
1030.000000
1030.000000
1030.000000
1030.000000
1030.000000
1030.000000
1030.000000
1030.000000
1030.000000
1030.000000
1030.000000
1030.000000
1030.000000
1030.000000
1030.000000
1030.000000
1030.000000
1030.000000
1030.000000
1030.000000
1030.000000
1030.000000
1030.000000
1030.000000
1030.000000
1030.000000
1030.000000
1030.000000
1030.000000
1030.000000
1030.000000
1030.000000
1030.000000
1030.000000
1030.000000
1030.000000
1030.000000
1030.000000
1030.000000
1030.000000
1030.000000
1030.000000
1030.000000
1030.000000
1030.000000
1030.000000
1030.000000
1030.000000
1030.000000
1030.000000
1030.000000
1030.000000
1030.000000
1030.000000
1030.000000
1030.000000
1030.000000
1030.000000
1030.000000
1030.000000
1030.000000
1030.000000
1030.000000
1030.000000
1030.000000
1030.000000
1030.000000
1030.000000
1030.000000
1030.000000
1030.000000
1030.000000
1030.000000
1030.000000
1030.000000
1030.000000
1030.000000
1030.000000
1030.000000
1030.000000
1030.000000
1030.000000
1030.000000
1030.000000
1030.000000
1030.000000
1030.000000
1030.000000
1030.000000
1030.000000
1030.000000
1030.000000
1030.000000
1030.000000
1030.000000
1030.000000
1030.000000
1030.000000
1030.000000
1030.000000
1030.000000
1030.000000
1030.000000
1030.000000
1030.000000
1030.000000
1030.000000
1030.000000
1030.000000
1030.000000
1030.000000
1030.000000
1030.000000
1030.000000
1030.000000
1030.000000
1030.000000
1030.000000
1030.000000
1030.000000
1030.000000
1030.000000
1030.000000
1030.000000
1030.000000
1030.000000
1030.000000
1030.000000
1030.000000
1030.000000
1030.000000
1030.000000
1030.000000
1030.000000
1030.000000
1030.000000
1030.000000
1030.000000
1030.000000
1030.000000
1030.000000
1030.000000
1030.000000
1030.000000
1030.000000
1030.000000
1030.000000
1030.000000
1030.000000
1030.000000
1030.000000
1030.000000
1030.000000
1030.000000
1030.000000
1030.000000
1030.000000
1030.000000
1030.000000
1030.000000
1030.000000
1030.000000
1030.000000
1030.000000
1030.000000
1030.000000
1030.000000
1030.000000
1030.000000
1030.000000
1030.000000
1030.000000
1030.000000
1030.000000
1030.000000
1030.000000
1030.000000
1030.000000
1030.000000
1030.000000
1030.000000
1030.000000
1030.000000
1030.000000
1030.000000
1030.000000
1030.000000
1030.000000
1030.000000
1030.000000
1030.000000
1030.000000
1030.000000
1030.000000
1030.000000
1030.000000
1030.000000
1030.000000
1030.000000
1030.000000
1030.000000
1030.000000
1030.000000
1030.000000
1030.000000
1030.000000
1030.000000
1030.000000
1030.000000
1030.000000
1030.000000
1030.000000
1030.000000
1030.000000
1030.000000
1030.000000
1030.000000
1030.000000
1030.000000
1030.000000
1030.000000
1030.000000
1030.000000
1030.000000
1030.000000
1030.000000
1030.000000
1030.000000
1030.000000
1030.000000
1030.000000
1030.000000
1030.000000
1030.000000
1030.000000
1030.000000
1030.000000
1030.000000
1030.000000
1030.000000
1030.000000
1030.000000
1030.000000
1030.000000
1030.000000
1030.000000
1030.000000
1030.000000
1030.000000
1030.000000
1030.000000
1030.000000
1030.000000
1030.000000
1030.000000
1030.000000
1030.000000
1030.000000
1030.000000
1030.000000
1030.000000
1030.000000
1030.000000
1030.000000
1030.000000
1030.000000
1030.000000
1030.000000
1030.000000
1030.000000
1030.000000
1030.000000
1030.000000
1030.000000
1030.000000
1030.000000
1030.000000
1030.000000
1030.000000
1030.000000
1030.000000
1030.000000
1030.000000
1030.000000
1030.000000
1030.000000
1030.000000
1030.000000
1030.000000
1030.000000
1030.000000
1030.000000
1030.000000
1030.000000
1030.000000
1030.000000
1030.000000
1030.000000
1030.000000
1030.000000
1030.000000
1030.000000
1030.000000
1030.000000
1030.000000
1030.000000
1030.000000
1030.000000
1030.000000
1030.000000
1030.000000
1030.000000
1030.000000
1030.000000
1030.000000
1030.000000
1030.000000
1030.000000
1030.000000
1030.000000
1030.000000
1030.000000
1030.000000
1030.000000
1030.000000
1030.000000
1030.000000
1030.000000
1030.000000
1030.000000
1030.000000
1030.000000
1030.000000
1030.000000
1030.000000
1030.000000
1030.000000
1030.000000
1030.000000
1030.000000
1030.000000
1030.000000
1030.000000
1030.000000
1030.000000
1030.000000
1030.000000
1030.000000
1030.000000
1030.000000
1030.000000
1030.000000
1030.000000
1030.000000
1030.000000
1030.000000
1030.000000
1030.000000
1030.000000
1030.000000
1030.000000
1030.000000
1030.000000
1030.000000
1030.000000
1030.000000
1030.000000
1030.000000
1030.000000
1030.000000
1030.000000
1030.000000
1030.000000
1030.000000
1030.000000
1030.000000
1030.000000
1030.000000
1030.000000
1030.000000
1030.000000
1030.000000
1030.000000
1030.000000
1030.000000
1030.000000
1030.000000
1030.000000
1030.000000
1030.000000
1030.000000
1030.000000
1030.000000
1030.000000
1030.000000
1030.000000
1030.000000
1030.000000
1030.000000
1030.000000
1030.000000
1030.000000
1030.000000
1030.000000
1030.000000
1030.000000
1030.000000
1030.000000
1030.000000
1030.000000
1030.000000
1030.000000
1030.000000
1030.000000
1030.000000
1030.000000
1030.000000
1030.000000
1030.000000
1030.000000
1030.000000
1030.000000
1030.000000
1030.000000
1030.000000
1030.000000
1030.000000
1030.000000
1030.000000
1030.000000
1030.000000
1030.000000
1030.000000
1030.000000
1030.000000
1030.000000
1030.000000
1030.000000
1030.000000
1030.000000
1030.000000
1030.000000
1030.000000
1030.000000
1030.000000
1030.000000
1030.000000
1030.000000
1030.000000
1030.000000
1030.000000
1030.000000
1030.000000
1030.000000
1030.000000
1030.000000
1030.000000
1030.000000
1030.000000
1030.000000
1030.000000
1030.000000
1030.000000
1030.000000
1030.000000
1030.000000
1030.000000
1030.000000
1030.000000
1030.000000
1030.000000
1030.000000
1030.000000
1030.000000
1030.000000
1030.000000
1030.000000
1030.000000
1030.000000
1030.000000
1030.000000
1030.000000
1030.000000
1030.000000
1030.000000
1030.000000
1030.000000
1030.000000
1030.000000
1030.000000
1030.000000
1030.000000
1030.000000
1030.000000
1030.000000
1030.000000
1030.000000
1030.000000
1030.000000
1030.000000
1030.000000
1030.000000
1030.000000
1030.000000
1030.000000
1030.000000
1030.000000
1030.000000
1030.000000
1030.000000
1030.000000
1030.000000
1030.000000
1030.000000
1030.000000
1030.000000
1030.000000
1030.000000
1030.000000
1030.000000
1030.000000
1030.000000
1030.000000
1030.000000
1030.000000
1030.000000
1030.000000
1030.000000
1030.000000
1030.000000
1030.000000
1030.000000
1030.000000
1030.000000
1030.000000
1030.000000
1030.000000
1030.000000
1030.000000
1030.000000
1030.000000
1030.000000
1030.000000
1030.000000
1030.000000
1030.000000
1030.000000
1030.000000
1030.000000
1030.000000
1030.000000
1030.000000
1030.000000
1030.000000
1030.000000
1030.000000
1030.000000
1030.000000
1030.000000
1030.000000
1030.000000
1030.000000
1030.000000
1030.000000
1030.000000
1030.000000
1030.000000
1030.000000
1030.000000
1030.000000
1030.000000
1030.000000
1030.000000
1030.000000
1030.000000
1030.000000
1030.000000
1030.000000
1030.000000
1030.000000
1030.000000
1030.000000
1030.000000
1030.000000
1030.000000
1030.000000
1030.000000
1030.000000
1030.000000
1030.000000
1030.000000
1030.000000
1030.000000
1030.000000
1030.000000
1030.000000
1030.000000
1030.000000
1030.000000
1030.000000
1030.000000
1030.000000
1030.000000
1030.000000
1030.000000
1030.000000
1030.000000
1030.000000
1030.000000
1030.000000
1030.000000
1030.000000
1030.000000
1030.000000
1030.000000
1030.000000
1030.000000
1030.000000
1030.000000
1030.000000
1030.000000
1030.000000
1030.000000
1030.000000
1030.000000
1030.000000
1030.000000
1030.000000
1030.000000
1030.000000
1030.000000
1030.000000
1030.000000
1030.000000
1030.000000
1030.000000
1030.000000
1030.000000
1030.000000
1030.000000
1030.000000
1030.000000
1030.000000
1030.000000
1030.000000
1030.000000
1030.000000
1030.000000
1030.000000
1030.000000
1030.000000
1030.000000
1030.000000
1030.000000
1030.000000
1030.000000
1030.000000
1030.000000
1030.000000
1030.000000
1030.000000
1030.000000
1030.000000
1030.000000
1030.000000
1030.000000
1030.000000
1030.000000
1030.000000
1030.000000
1030.000000
1030.000000
1030.000000
1030.000000
1030.000000
1030.000000
1030.000000
1030.000000
1030.000000
1030.000000
1030.000000
1030.000000
1030.000000
1030.000000
1030.000000
1030.000000
1030.000000
1030.000000
1030.000000
1030.000000
1030.000000
1030.000000
1030.000000
1030.000000
1030.000000
1030.000000
1030.000000
1030.000000
1030.000000
1030.000000
1030.000000
1030.000000
1030.000000
1030.000000
1030.000000
1030.000000
1030.000000
1030.000000
1030.000000
1030.000000
1030.000000
1030.000000
1030.000000
1030.000000
1030.000000
1030.000000
1030.000000
1030.000000
1030.000000
1030.000000
1030.000000
1030.000000
1030.000000
1030.000000
1030.000000
1030.000000
1030.000000
1030.000000
1030.000000
1030.000000
1030.000000
1030.000000
1030.000000
1030.000000
1030.000000
1030.000000
1030.000000
1030.000000
1030.000000
1030.000000
1030.000000
1030.000000
1030.000000
1030.000000
1030.000000
1030.000000
1030.000000
1030.000000
1030.000000
1030.000000
1030.000000
1030.000000
1030.000000
1030.000000
1030.000000
1030.000000
1030.000000
1030.000000
1030.000000
1030.000000
1030.000000
1030.000000
1030.000000
1030.000000
1030.000000
1030.000000
1030.000000
1030.000000
1030.000000
1030.000000
1030.000000
1030.000000
1030.000000
1030.000000
1030.000000
1030.000000
1030.000000
1030.000000
1030.000000
1030.000000
1030.000000
1030.000000
1030.000000
1030.000000
1030.000000
1030.000000
1030.000000
1030.000000
1030.000000
1030.000000
1030.000000
1030.000000
1030.000000
1030.000000
1030.000000
1030.000000
1030.000000
1030.000000
1030.000000
1030.000000
1030.000000
1030.000000
1030.000000
1030.000000
1030.000000
1030.000000
1030.000000
1030.000000
1030.000000
1030.000000
1030.000000
1030.000000
1030.000000
1030.000000
1030.000000
1030.000000
1030.000000
1030.000000
1030.000000
1030.000000
1030.000000
1030.000000
1030.000000
1030.000000
1030.000000
1030.000000
1030.000000
1030.000000
1030.000000
1030.000000
1030.000000
1030.000000
1030.000000
1030.000000
1030.000000
1030.000000
1030.000000
1030.000000
1030.000000
1030.000000
1030.000000
1030.000000
1030.000000
1030.000000
1030.000000
1030.000000
1030.000000
1030.000000
1030.000000
1030.000000
1030.000000
1030.000000
1030.000000
1030.000000
1030.000000
1030.000000
1030.000000
1030.000000
1030.000000
1030.000000
1030.000000
1030.000000
1030.000000
1030.000000
1030.000000
1030.000000
1030.000000
1030.000000
1030.000000
1030.000000
1030.000000
1030.000000
1030.000000
1030.000000
1030.000000
1030.000000
1030.000000
1030.000000
1030.000000
1030.000000
1030.000000
1030.000000
1030.000000
1030.000000
1030.000000
1030.000000
1030.000000
1030.000000
1030.000000
1030.000000
1030.000000
1030.000000
1030.000000
1030.000000
1030.000000
1030.000000
1030.000000
1030.000000
1030.000000
1030.000000
1030.000000
1030.000000
1030.000000
1030.000000
1030.000000
1030.000000
1030.000000
1030.000000
1030.000000
1030.000000
1030.000000
1030.000000
1030.000000
1030.000000
1030.000000
1030.000000
1030.000000
1030.000000
1030.000000
1030.000000
1030.000000
1030.000000
1030.000000
1030.000000
1030.000000
1030.000000
1030.000000
1030.000000
1030.000000
1030.000000
1030.000000
1030.000000
1030.000000
1030.000000
1030.000000
1030.000000
1030.000000
1030.000000
1030.000000
1030.000000
1030.000000
1030.000000
1030.000000
1030.000000
1030.000000
1030.000000
1030.000000
1030.000000
1030.000000
1030.000000
1030.000000
1030.000000
1030.000000
1030.000000
1030.000000
1030.000000
1030.000000
1030.000000
1030.000000
1030.000000
1030.000000
1030.000000
1030.000000
1030.000000
1030.000000
1030.000000
1030.000000
1030.000000
1030.000000
1030.000000
1030.000000
1030.000000
1030.000000
1030.000000
1030.000000
1030.000000
1030.000000
1030.000000
1030.000000
1030.000000
1030.000000
1030.000000
1030.000000
1030.000000
1030.000000
1030.000000
1030.000000
1030.000000
1030.000000
1030.000000
1030.000000
1030.000000
1030.000000
1030.000000
1030.000000
1030.000000
1030.000000
1030.000000
1030.000000
1030.000000
1030.000000
1030.000000
1030.000000
1030.000000
1030.000000
1030.000000
1030.000000
1030.000000
1030.000000
1030.000000
1030.000000
1030.000000
1030.000000
1030.000000
1030.000000
1030.000000
1030.000000
1030.000000
1030.000000
1030.000000
1030.000000
1030.000000
1030.000000
1030.000000
1030.000000
1030.000000
1030.000000
1030.000000
1030.000000
1030.000000
1030.000000
1030.000000
1030.000000
1030.000000
1030.000000
1030.000000
1030.000000
1030.000000
1030.000000
1030.000000
1030.000000
1030.000000
1030.000000
1030.000000
1030.000000
1030.000000
1030.000000
1030.000000
1030.000000
1030.000000
1030.000000
1030.000000
1030.000000
1030.000000
1030.000000
1030.000000
1030.000000
1030.000000
1030.000000
1030.000000
1030.000000
1030.000000
1030.000000
1030.000000
1030.000000
1030.000000
1030.000000
1030.000000
1030.000000
1030.000000
1030.000000
1030.000000
1030.000000
1030.000000
1030.000000
1030.000000
1030.000000
1030.000000
1030.000000
1030.000000
1030.000000
1030.000000
1030.000000
1030.000000
1030.000000
1030.000000
1030.000000
1030.000000
1030.000000
1030.000000
1030.000000
1030.000000
1030.000000
1030.000000
1030.000000
1030.000000
1030.000000
1030.000000
1030.000000
1030.000000
1030.000000
1030.000000
1030.000000
1030.000000
1030.000000
1030.000000
1030.000000
1030.000000
1030.000000
1030.000000
1030.000000
1030.000000
1030.000000
1030.000000
1030.000000
1030.000000
1030.000000
1030.000000
1030.000000
1030.000000
1030.000000
1030.000000
1030.000000
1030.000000
1030.000000
1030.000000
1030.000000
1030.000000
1030.000000
1030.000000
1030.000000
1030.000000
1030.000000
1030.000000
1030.000000
1030.000000
1030.000000
1030.000000
1030.000000
1030.000000
1030.000000
1030.000000
1030.000000
1030.000000
1030.000000
1030.000000
1030.000000
1030.000000
1030.000000
1030.000000
1030.000000
1030.000000
1030.000000
1030.000000
1030.000000
1030.000000
1030.000000
1030.000000
1030.000000
1030.000000
1030.000000
1030.000000
1030.000000
1030.000000
1030.000000
1030.000000
1030.000000
1030.000000
1030.000000
1030.000000
1030.000000
1030.000000
1030.000000
1030.000000
1030.000000
1030.000000
1030.000000
1030.000000
1030.000000
1030.000000
1030.000000
1030.000000
1030.000000
1030.000000
1030.000000
1030.000000
1030.000000
1030.000000
1030.000000
1030.000000
1030.000000
1030.000000
1030.000000
1030.000000
1030.000000
1030.000000
1030.000000
1030.000000
1030.000000
1030.000000
1030.000000
1030.000000
1030.000000
1030.000000
1030.000000
1030.000000
1030.000000
1030.000000
1030.000000
1030.000000
1030.000000
1030.000000
1030.000000
1030.000000
1030.000000
1030.000000
1030.000000
1030.000000
1030.000000
1030.000000
1030.000000
1030.000000
1030.000000
1030.000000
1030.000000
1030.000000
1030.000000
1030.000000
1030.000000
1030.000000
1030.000000
1030.000000
1030.000000
1030.000000
1030.000000
1030.000000
1030.000000
1030.000000
1030.000000
1030.000000
1030.000000
1030.000000
1030.000000
1030.000000
1030.000000
1030.000000
1030.000000
1030.000000
1030.000000
1030.000000
1030.000000
1030.000000
1030.000000
1030.000000
1030.000000
1030.000000
1030.000000
1030.000000
1030.000000
1030.000000
1030.000000
1030.000000
1030.000000
1030.000000
1030.000000
1030.000000
1030.000000
1030.000000
1030.000000
1030.000000
1030.000000
1030.000000
1030.000000
1030.000000
1030.000000
1030.000000
1030.000000
1030.000000
1030.000000
1030.000000
1030.000000
1030.000000
1030.000000
1030.000000
1030.000000
1030.000000
1030.000000
1030.000000
1030.000000
1030.000000
1030.000000
1030.000000
1030.000000
1030.000000
1030.000000
1030.000000
1030.000000
1030.000000
1030.000000
1030.000000
1030.000000
1030.000000
1030.000000
1030.000000
1030.000000
1030.000000
1030.000000
1030.000000
1030.000000
1030.000000
1030.000000
1030.000000
1030.000000
1030.000000
1030.000000
1030.000000
1030.000000
1030.000000
1030.000000
1030.000000
1030.000000
1030.000000
1030.000000
1030.000000
1030.000000
1030.000000
1030.000000
1030.000000
1030.000000
1030.000000
1030.000000
1030.000000
1030.000000
1030.000000
1030.000000
1030.000000
1030.000000
1030.000000
1030.000000
1030.000000
1030.000000
1030.000000
1030.000000
1030.000000
1030.000000
1030.000000
1030.000000
1030.000000
1030.000000
1030.000000
1030.000000
1030.000000
1030.000000
1030.000000
1030.000000
1030.000000
1030.000000
1030.000000
1030.000000
1030.000000
1030.000000
1030.000000
1030.000000
1030.000000
1030.000000
1030.000000
1030.000000
1030.000000
1030.000000
1030.000000
1030.000000
1030.000000
1030.000000
1030.000000
1030.000000
1030.000000
1030.000000
1030.000000
1030.000000
1030.000000
1030.000000
1030.000000
1030.000000
1030.000000
1030.000000
1030.000000
1030.000000
1030.000000
1030.000000
1030.000000
1030.000000
1030.000000
1030.000000
1030.000000
1030.000000
1030.000000
1030.000000
1030.000000
1030.000000
1030.000000
1030.000000
1030.000000
1030.000000
1030.000000
1030.000000
1030.000000
1030.000000
1030.000000
1030.000000
1030.000000
1030.000000
1030.000000
1030.000000
1030.000000
1030.000000
1030.000000
1030.000000
1030.000000
1030.000000
1030.000000
1030.000000
1030.000000
1030.000000
1030.000000
1030.000000
1030.000000
1030.000000
1030.000000
1030.000000
1030.000000
1030.000000
1030.000000
1030.000000
1030.000000
1030.000000
1030.000000
1030.000000
1030.000000
1030.000000
1030.000000
1030.000000
1030.000000
1030.000000
1030.000000
1030.000000
1030.000000
1030.000000
1030.000000
1030.000000
1030.000000
1030.000000
1030.000000
1030.000000
1030.000000
1030.000000
1030.000000
1030.000000
1030.000000
1030.000000
1030.000000
1030.000000
1030.000000
1030.000000
1030.000000
1030.000000
1030.000000
1030.000000
1030.000000
1030.000000
1030.000000
1030.000000
1030.000000
1030.000000
1030.000000
1030.000000
1030.000000
1030.000000
1030.000000
1030.000000
1030.000000
1030.000000
1030.000000
1030.000000
1030.000000
1030.000000
1030.000000
1030.000000
1030.000000
1030.000000
1030.000000
1030.000000
1030.000000
1030.000000
1030.000000
1030.000000
1030.000000
1030.000000
1030.000000
1030.000000
1030.000000
1030.000000
1030.000000
1030.000000
1030.000000
1030.000000
1030.000000
1030.000000
1030.000000
1030.000000
1030.000000
1030.000000
1030.000000
1030.000000
1030.000000
1030.000000
1030.000000
1030.000000
1030.000000
1030.000000
1030.000000
1030.000000
1030.000000
1030.000000
1030.000000
1030.000000
1030.000000
1030.000000
1030.000000
1030.000000
1030.000000
1030.000000
1030.000000
1030.000000
1030.000000
1030.000000
1030.000000
1030.000000
1030.000000
1030.000000
1030.000000
1030.000000
1030.000000
1030.000000
1030.000000
1030.000000
1030.000000
1030.000000
1030.000000
1030.000000
1030.000000
1030.000000
1030.000000
1030.000000
1030.000000
1030.000000
1030.000000
1030.000000
1030.000000
1030.000000
1030.000000
1030.000000
1030.000000
1030.000000
1030.000000
1030.000000
1030.000000
1030.000000
1030.000000
1030.000000
1030.000000
1030.000000
1030.000000
1030.000000
1030.000000
1030.000000
1030.000000
1030.000000
1030.000000
1030.000000
1030.000000
1030.000000
1030.000000
1030.000000
1030.000000
1030.000000
1030.000000
1030.000000
1030.000000
1030.000000
1030.000000
1030.000000
1030.000000
1030.000000
1030.000000
1030.000000
1030.000000
1030.000000
1030.000000
1030.000000
1030.000000
1030.000000
1030.000000
1030.000000
1030.000000
1030.000000
1030.000000
1030.000000
1030.000000
1030.000000
1030.000000
1030.000000
1030.000000
1030.000000
1030.000000
1030.000000
1030.000000
1030.000000
1030.000000
1030.000000
1030.000000
1030.000000
1030.000000
1030.000000
1030.000000
1030.000000
1030.000000
1030.000000
1030.000000
1030.000000
1030.000000
1030.000000
1030.000000
1030.000000
1030.000000
1030.000000
1030.000000
1030.000000
1030.000000
1030.000000
1030.000000
1030.000000
1030.000000
1030.000000
1030.000000
1030.000000
1030.000000
1030.000000
1030.000000
1030.000000
1030.000000
1030.000000
1030.000000
1030.000000
1030.000000
1030.000000
1030.000000
1030.000000
1030.000000
1030.000000
1030.000000
1030.000000
1030.000000
1030.000000
1030.000000
1030.000000
1030.000000
1030.000000
1030.000000
1030.000000
1030.000000
1030.000000
1030.000000
1030.000000
1030.000000
1030.000000
1030.000000
1030.000000
1030.000000
1030.000000
1030.000000
1030.000000
1030.000000
1030.000000
1030.000000
1030.000000
1030.000000
1030.000000
1030.000000
1030.000000
1030.000000
1030.000000
1030.000000
1030.000000
1030.000000
1030.000000
1030.000000
1030.000000
1030.000000
1030.000000
1030.000000
1030.000000
1030.000000
1030.000000
1030.000000
1030.000000
1030.000000
1030.000000
1030.000000
1030.000000
1030.000000
1030.000000
1030.000000
1030.000000
1030.000000
1030.000000
1030.000000
1030.000000
1030.000000
1030.000000
1030.000000
1030.000000
1030.000000
1030.000000
1030.000000
1030.000000
1030.000000
1030.000000
1030.000000
1030.000000
1030.000000
1030.000000
1030.000000
1030.000000
1030.000000
1030.000000
1030.000000
1030.000000
1030.000000
1030.000000
1030.000000
1030.000000
1030.000000
1030.000000
1030.000000
1030.000000
1030.000000
1030.000000
1030.000000
1030.000000
1030.000000
1030.000000
1030.000000
1030.000000
1030.000000
1030.000000
1030.000000
1030.000000
1030.000000
1030.000000
1030.000000
1030.000000
1030.000000
1030.000000
1030.000000
1030.000000
1030.000000
1030.000000
1030.000000
1030.000000
1030.000000
1030.000000
1030.000000
1030.000000
1030.000000
1030.000000
1030.000000
1030.000000
1030.000000
1030.000000
1030.000000
1030.000000
1030.000000
1030.000000
1030.000000
1030.000000
1030.000000
1030.000000
1030.000000
1030.000000
1030.000000
1030.000000
1030.000000
1030.000000
1030.000000
1030.000000
1030.000000
1030.000000
1030.000000
1030.000000
1030.000000
1030.000000
1030.000000
1030.000000
1030.000000
1030.000000
1030.000000
1030.000000
1030.000000
1030.000000
1030.000000
1030.000000
1030.000000
1030.000000
1030.000000
1030.000000
1030.000000
1030.000000
1030.000000
1030.000000
1030.000000
1030.000000
1030.000000
1030.000000
1030.000000
1030.000000
1030.000000
1030.000000
1030.000000
1030.000000
1030.000000
1030.000000
1030.000000
1030.000000
1030.000000
1030.000000
1030.000000
1030.000000
1030.000000
1030.000000
1030.000000
1030.000000
1030.000000
1030.000000
1030.000000
1030.000000
1030.000000
1030.000000
1030.000000
1030.000000
1030.000000
1030.000000
1030.000000
1030.000000
1030.000000
1030.000000
1030.000000
1030.000000
1030.000000
1030.000000
1030.000000
1030.000000
1030.000000
1030.000000
1030.000000
1030.000000
1030.000000
1030.000000
1030.000000
1030.000000
1030.000000
1030.000000
1030.000000
1030.000000
1030.000000
1030.000000
1030.000000
1030.000000
1030.000000
1030.000000
1030.000000
1030.000000
1030.000000
1030.000000
1030.000000
1030.000000
1030.000000
1030.000000
1030.000000
1030.000000
1030.000000
1030.000000
1030.000000
1030.000000
1030.000000
1030.000000
1030.000000
1030.000000
1030.000000
1030.000000
1030.000000
1030.000000
1030.000000
1030.000000
1030.000000
1030.000000
1030.000000
1030.000000
1030.000000
1030.000000
1030.000000
1030.000000
1030.000000
1030.000000
1030.000000
1030.000000
1030.000000
1030.000000
1030.000000
1030.000000
1030.000000
1030.000000
1030.000000
1030.000000
1030.000000
1030.000000
1030.000000
1030.000000
1030.000000
1030.000000
1030.000000
1030.000000
1030.000000
1030.000000
1030.000000
1030.000000
1030.000000
1030.000000
1030.000000
1030.000000
1030.000000
1030.000000
1030.000000
1030.000000
1030.000000
1030.000000
1030.000000
1030.000000
1030.000000
1030.000000
1030.000000
1030.000000
1030.000000
1030.000000
1030.000000
1030.000000
1030.000000
1030.000000
1030.000000
1030.000000
1030.000000
1030.000000
1030.000000
1030.000000
1030.000000
1030.000000
1030.000000
1030.000000
1030.000000
1030.000000
1030.000000
1030.000000
1030.000000
1030.000000
1030.000000
1030.000000
1030.000000
1030.000000
1030.000000
1030.000000
1030.000000
1030.000000
1030.000000
1030.000000
1030.000000
1030.000000
1030.000000
1030.000000
1030.000000
1030.000000
1030.000000
1030.000000
1030.000000
1030.000000
1030.000000
1030.000000
1030.000000
1030.000000
1030.000000
1030.000000
1030.000000
1030.000000
1030.000000
1030.000000
1030.000000
1030.000000
1030.000000
1030.000000
1030.000000
1030.000000
1030.000000
1030.000000
1030.000000
1030.000000
1030.000000
1030.000000
1030.000000
1030.000000
1030.000000
1030.000000
1030.000000
1030.000000
1030.000000
1030.000000
1030.000000
1030.000000
1030.000000
1030.000000
1030.000000
1030.000000
1030.000000
1030.000000
1030.000000
1030.000000
1030.000000
1030.000000
1030.000000
1030.000000
1030.000000
1030.000000
1030.000000
1030.000000
1030.000000
1030.000000
1030.000000
1030.000000
1030.000000
1030.000000
1030.000000
1030.000000
1030.000000
1030.000000
1030.000000
1030.000000
1030.000000
1030.000000
1030.000000
1030.000000
1030.000000
1030.000000
1030.000000
1030.000000
1030.000000
1030.000000
1030.000000
1030.000000
1030.000000
1030.000000
1030.000000
1030.000000
1030.000000
1030.000000
1030.000000
1030.000000
1030.000000
1030.000000
1030.000000
1030.000000
1030.000000
1030.000000
1030.000000
1030.000000
1030.000000
1030.000000
1030.000000
1030.000000
1030.000000
1030.000000
1030.000000
1030.000000
1030.000000
1030.000000
1030.000000
1030.000000
1030.000000
1030.000000
1030.000000
1030.000000
1030.000000
1030.000000
1030.000000
1030.000000
1030.000000
1030.000000
1030.000000
1030.000000
1030.000000
1030.000000
1030.000000
1030.000000
1030.000000
1030.000000
1030.000000
1030.000000
1030.000000
1030.000000
1030.000000
1030.000000
1030.000000
1030.000000
1030.000000
1030.000000
1030.000000
1030.000000
1030.000000
1030.000000
1030.000000
1030.000000
1030.000000
1030.000000
1030.000000
1030.000000
1030.000000
1030.000000
1030.000000
1030.000000
1030.000000
1030.000000
1030.000000
1030.000000
1030.000000
1030.000000
1030.000000
1030.000000
1030.000000
1030.000000
1030.000000
1030.000000
1030.000000
1030.000000
1030.000000
1030.000000
1030.000000
1030.000000
1030.000000
1030.000000
1030.000000
1030.000000
1030.000000
1030.000000
1030.000000
1030.000000
1030.000000
1030.000000
1030.000000
1030.000000
1030.000000
1030.000000
1030.000000
1030.000000
1030.000000
1030.000000
1030.000000
1030.000000
1030.000000
1030.000000
1030.000000
1030.000000
1030.000000
1030.000000
1030.000000
1030.000000
1030.000000
1030.000000
1030.000000
1030.000000
1030.000000
1030.000000
1030.000000
1030.000000
1030.000000
1030.000000
1030.000000
1030.000000
1030.000000
1030.000000
1030.000000
1030.000000
1030.000000
1030.000000
1030.000000
1030.000000
1030.000000
1030.000000
1030.000000
1030.000000
1030.000000
1030.000000
1030.000000
1030.000000
1030.000000
1030.000000
1030.000000
1030.000000
1030.000000
1030.000000
1030.000000
1030.000000
1030.000000
1030.000000
1030.000000
1030.000000
1030.000000
1030.000000
1030.000000
1030.000000
1030.000000
1030.000000
1030.000000
1030.000000
1030.000000
1030.000000
1030.000000
1030.000000
1030.000000
1030.000000
1030.000000
1030.000000
1030.000000
1030.000000
1030.000000
1030.000000
1030.000000
1030.000000
1030.000000
1030.000000
1030.000000
1030.000000
1030.000000
1030.000000
1030.000000
1030.000000
1030.000000
1030.000000
1030.000000
1030.000000
1030.000000
1030.000000
1030.000000
1030.000000
1030.000000
1030.000000
1030.000000
1030.000000
1030.000000
1030.000000
1030.000000
1030.000000
1030.000000
1030.000000
1030.000000
1030.000000
1030.000000
1030.000000
1030.000000
1030.000000
1030.000000
1030.000000
1030.000000
1030.000000
1030.000000
1030.000000
1030.000000
1030.000000
1030.000000
1030.000000
1030.000000
1030.000000
1030.000000
1030.000000
1030.000000
1030.000000
1030.000000
1030.000000
1030.000000
1030.000000
1030.000000
1030.000000
1030.000000
1030.000000
1030.000000
1030.000000
1030.000000
1030.000000
1030.000000
1030.000000
1030.000000
1030.000000
1030.000000
1030.000000
1030.000000
1030.000000
1030.000000
1030.000000
1030.000000
1030.000000
1030.000000
1030.000000
1030.000000
1030.000000
1030.000000
1030.000000
1030.000000
1030.000000
1030.000000
1030.000000
1030.000000
1030.000000
1030.000000
1030.000000
1030.000000
1030.000000
1030.000000
1030.000000
1030.000000
1030.000000
1030.000000
1030.000000
1030.000000
1030.000000
1030.000000
1030.000000
1030.000000
1030.000000
1030.000000
1030.000000
1030.000000
1030.000000
1030.000000
1030.000000
1030.000000
1030.000000
1030.000000
1030.000000
1030.000000
1030.000000
1030.000000
1030.000000
1030.000000
1030.000000
1030.000000
1030.000000
1030.000000
1030.000000
1030.000000
1030.000000
1030.000000
1030.000000
1030.000000
1030.000000
1030.000000
1030.000000
1030.000000
1030.000000
1030.000000
1030.000000
1030.000000
1030.000000
1030.000000
1030.000000
1030.000000
1030.000000
1030.000000
1030.000000
1030.000000
1030.000000
1030.000000
1030.000000
1030.000000
1030.000000
1030.000000
1030.000000
1030.000000
1030.000000
1030.000000
1030.000000
1030.000000
1030.000000
1030.000000
1030.000000
1030.000000
1030.000000
1030.000000
1030.000000
1030.000000
1030.000000
1030.000000
1030.000000
1030.000000
1030.000000
1030.000000
1030.000000
1030.000000
1030.000000
1030.000000
1030.000000
1030.000000
1030.000000
1030.000000
1030.000000
1030.000000
1030.000000
1030.000000
1030.000000
1030.000000
1030.000000
1030.000000
1030.000000
1030.000000
1030.000000
1030.000000
1030.000000
1030.000000
1030.000000
1030.000000
1030.000000
1030.000000
1030.000000
1030.000000
1030.000000
1030.000000
1030.000000
1030.000000
1030.000000
1030.000000
1030.000000
1030.000000
1030.000000
1030.000000
1030.000000
1030.000000
1030.000000
1030.000000
1030.000000
1030.000000
1030.000000
1030.000000
1030.000000
1030.000000
1030.000000
1030.000000
1030.000000
1030.000000
1030.000000
1030.000000
1030.000000
1030.000000
1030.000000
1030.000000
1030.000000
1030.000000
1030.000000
1030.000000
1030.000000
1030.000000
1030.000000
1030.000000
1030.000000
1030.000000
1030.000000
1030.000000
1030.000000
1030.000000
1030.000000
1030.000000
1030.000000
1030.000000
1030.000000
1030.000000
1030.000000
1030.000000
1030.000000
1030.000000
1030.000000
1030.000000
1030.000000
1030.000000
1030.000000
1030.000000
1030.000000
1030.000000
1030.000000
1030.000000
1030.000000
1030.000000
1030.000000
1030.000000
1030.000000
1030.000000
1030.000000
1030.000000
1030.000000
1030.000000
1030.000000
1030.000000
1030.000000
1030.000000
1030.000000
1030.000000
1030.000000
1030.000000
1030.000000
1030.000000
1030.000000
1030.000000
1030.000000
1030.000000
1030.000000
1030.000000
1030.000000
1030.000000
1030.000000
1030.000000
1030.000000
1030.000000
1030.000000
1030.000000
1030.000000
1030.000000
1030.000000
1030.000000
1030.000000
1030.000000
1030.000000
1030.000000
1030.000000
1030.000000
1030.000000
1030.000000
1030.000000
1030.000000
1030.000000
1030.000000
1030.000000
1030.000000
1030.000000
1030.000000
1030.000000
1030.000000
1030.000000
1030.000000
1030.000000
1030.000000
1030.000000
1030.000000
1030.000000
1030.000000
1030.000000
1030.000000
1030.000000
1030.000000
1030.000000
1030.000000
1030.000000
1030.000000
1030.000000
1030.000000
1030.000000
1030.000000
1030.000000
1030.000000
1030.000000
1030.000000
1030.000000
1030.000000
1030.000000
1030.000000
1030.000000
1030.000000
1030.000000
1030.000000
1030.000000
1030.000000
1030.000000
1030.000000
1030.000000
1030.000000
1030.000000
1030.000000
1030.000000
1030.000000
1030.000000
1030.000000
1030.000000
1030.000000
1030.000000
1030.000000
1030.000000
1030.000000
1030.000000
1030.000000
1030.000000
1030.000000
1030.000000
1030.000000
1030.000000
1030.000000
1030.000000
1030.000000
1030.000000
1030.000000
1030.000000
1030.000000
1030.000000
1030.000000
1030.000000
1030.000000
1030.000000
1030.000000
1030.000000
1030.000000
1030.000000
1030.000000
1030.000000
1030.000000
1030.000000
1030.000000
1030.000000
1030.000000
1030.000000
1030.000000
1030.000000
1030.000000
1030.000000
1030.000000
1030.000000
1030.000000
1030.000000
1030.000000
1030.000000
1030.000000
1030.000000
1030.000000
1030.000000
1030.000000
1030.000000
1030.000000
1030.000000
1030.000000
1030.000000
1030.000000
1030.000000
1030.000000
1030.000000
1030.000000
1030.000000
1030.000000
1030.000000
1030.000000
1030.000000
1030.000000
1030.000000
1030.000000
1030.000000
1030.000000
1030.000000
1030.000000
1030.000000
1030.000000
1030.000000
1030.000000
1030.000000
1030.000000
1030.000000
1030.000000
1030.000000
1030.000000
1030.000000
1030.000000
1030.000000
1030.000000
1030.000000
1030.000000
1030.000000
1030.000000
1030.000000
1030.000000
1030.000000
1030.000000
1030.000000
1030.000000
1030.000000
1030.000000
1030.000000
1030.000000
1030.000000
1030.000000
1030.000000
1030.000000
1030.000000
1030.000000
1030.000000
1030.000000
1030.000000
1030.000000
1030.000000
1030.000000
1030.000000
1030.000000
1030.000000
1030.000000
1030.000000
1030.000000
1030.000000
1030.000000
1030.000000
1030.000000
1030.000000
1030.000000
1030.000000
1030.000000
1030.000000
1030.000000
1030.000000
1030.000000
1030.000000
1030.000000
1030.000000
1030.000000
1030.000000
1030.000000
1030.000000
1030.000000
1030.000000
1030.000000
1030.000000
1030.000000
1030.000000
1030.000000
1030.000000
1030.000000
1030.000000
1030.000000
1030.000000
1030.000000
1030.000000
1030.000000
1030.000000
1030.000000
1030.000000
1030.000000
1030.000000
1030.000000
1030.000000
1030.000000
1030.000000
1030.000000
1030.000000
1030.000000
1030.000000
1030.000000
1030.000000
1030.000000
1030.000000
1030.000000
1030.000000
1030.000000
1030.000000
1030.000000
1030.000000
1030.000000
1030.000000
1030.000000
1030.000000
1030.000000
1030.000000
1030.000000
1030.000000
1030.000000
1030.000000
1030.000000
1030.000000
1030.000000
1030.000000
1030.000000
1030.000000
1030.000000
1030.000000
1030.000000
1030.000000
1030.000000
1030.000000
1030.000000
1030.000000
1030.000000
1030.000000
1030.000000
1030.000000
1030.000000
1030.000000
1030.000000
1030.000000
1030.000000
1030.000000
1030.000000
1030.000000
1030.000000
1030.000000
1030.000000
1030.000000
1030.000000
1030.000000
1030.000000
1030.000000
1030.000000
1030.000000
1030.000000
1030.000000
1030.000000
1030.000000
1030.000000
1030.000000
1030.000000
1030.000000
1030.000000
1030.000000
1030.000000
1030.000000
1030.000000
1030.000000
1030.000000
1030.000000
1030.000000
1030.000000
1030.000000
1030.000000
1030.000000
1030.000000
1030.000000
1030.000000
1030.000000
1030.000000
1030.000000
1030.000000
1030.000000
1030.000000
1030.000000
1030.000000
1030.000000
1030.000000
1030.000000
1030.000000
1030.000000
1030.000000
1030.000000
1030.000000
1030.000000
1030.000000
1030.000000
1030.000000
1030.000000
1030.000000
1030.000000
1030.000000
1030.000000
1030.000000
1030.000000
1030.000000
1030.000000
1030.000000
1030.000000
1030.000000
1030.000000
1030.000000
1030.000000
1030.000000
1030.000000
1030.000000
1030.000000
1030.000000
1030.000000
1030.000000
1030.000000
1030.000000
1030.000000
1030.000000
1030.000000
1030.000000
1030.000000
1030.000000
1030.000000
1030.000000
1030.000000
1030.000000
1030.000000
1030.000000
1030.000000
1030.000000
1030.000000
1030.000000
1030.000000
1030.000000
1030.000000
1030.000000
1030.000000
1030.000000
1030.000000
1030.000000
1030.000000
1030.000000
1030.000000
1030.000000
1030.000000
1030.000000
1030.000000
1030.000000
1030.000000
1030.000000
1030.000000
1030.000000
1030.000000
1030.000000
1030.000000
1030.000000
1030.000000
1030.000000
1030.000000
1030.000000
1030.000000
1030.000000
1030.000000
1030.000000
1030.000000
1030.000000
1030.000000
1030.000000
1030.000000
1030.000000
1030.000000
1030.000000
1030.000000
1030.000000
1030.000000
1030.000000
1030.000000
1030.000000
1030.000000
1030.000000
1030.000000
1030.000000
1030.000000
1030.000000
1030.000000
1030.000000
1030.000000
1030.000000
1030.000000
1030.000000
1030.000000
1030.000000
1030.000000
1030.000000
1030.000000
1030.000000
1030.000000
1030.000000
1030.000000
1030.000000
1030.000000
1030.000000
1030.000000
1030.000000
1030.000000
1030.000000
1030.000000
1030.000000
1030.000000
1030.000000
1030.000000
1030.000000
1030.000000
1030.000000
1030.000000
1030.000000
1030.000000
1030.000000
1030.000000
1030.000000
1030.000000
1030.000000
1030.000000
1030.000000
1030.000000
1030.000000
1030.000000
1030.000000
1030.000000
1030.000000
1030.000000
1030.000000
1030.000000
1030.000000
1030.000000
1030.000000
1030.000000
1030.000000
1030.000000
1030.000000
1030.000000
1030.000000
1030.000000
1030.000000
1030.000000
1030.000000
1030.000000
1030.000000
1030.000000
1030.000000
1030.000000
1030.000000
1030.000000
1030.000000
1030.000000
1030.000000
1030.000000
1030.000000
1030.000000
1030.000000
1030.000000
1030.000000
1030.000000
1030.000000
1030.000000
1030.000000
1030.000000
1030.000000
1030.000000
1030.000000
1030.000000
1030.000000
1030.000000
1030.000000
1030.000000
1030.000000
1030.000000
1030.000000
1030.000000
1030.000000
1030.000000
1030.000000
1030.000000
1030.000000
1030.000000
1030.000000
1030.000000
1030.000000
1030.000000
1030.000000
1030.000000
1030.000000
1030.000000
1030.000000
1030.000000
1030.000000
1030.000000
1030.000000
1030.000000
1030.000000
1030.000000
1030.000000
1030.000000
1030.000000
1030.000000
1030.000000
1030.000000
1030.000000
1030.000000
1030.000000
1030.000000
1030.000000
1030.000000
1030.000000
1030.000000
1030.000000
1030.000000
1030.000000
1030.000000
1030.000000
1030.000000
1030.000000
1030.000000
1030.000000
1030.000000
1030.000000
1030.000000
1030.000000
1030.000000
1030.000000
1030.000000
1030.000000
1030.000000
1030.000000
1030.000000
1030.000000
1030.000000
1030.000000
1030.000000
1030.000000
1030.000000
1030.000000
1030.000000
1030.000000
1030.000000
1030.000000
1030.000000
1030.000000
1030.000000
1030.000000
1030.000000
1030.000000
1030.000000
1030.000000
1030.000000
1030.000000
1030.000000
1030.000000
1030.000000
1030.000000
1030.000000
1030.000000
1030.000000
1030.000000
1030.000000
1030.000000
1030.000000
1030.000000
1030.000000
1030.000000
1030.000000
1030.000000
1030.000000
1030.000000
1030.000000
1030.000000
1030.000000
1030.000000
1030.000000
1030.000000
1030.000000
1030.000000
1030.000000
1030.000000
1030.000000
1030.000000
1030.000000
1030.000000
1030.000000
1030.000000
1030.000000
1030.000000
1030.000000
1030.000000
1030.000000
1030.000000
1030.000000
1030.000000
1030.000000
1030.000000
1030.000000
1030.000000
1030.000000
1030.000000
1030.000000
1030.000000
1030.000000
1030.000000
1030.000000
1030.000000
1030.000000
1030.000000
1030.000000
1030.000000
1030.000000
1030.000000
1030.000000
1030.000000
1030.000000
1030.000000
1030.000000
1030.000000
1030.000000
1030.000000
1030.000000
1030.000000
1030.000000
1030.000000
1030.000000
1030.000000
1030.000000
1030.000000
1030.000000
1030.000000
1030.000000
1030.000000
1030.000000
1030.000000
1030.000000
1030.000000
1030.000000
1030.000000
1030.000000
1030.000000
1030.000000
1030.000000
1030.000000
1030.000000
1030.000000
1030.000000
1030.000000
1030.000000
1030.000000
1030.000000
1030.000000
1030.000000
1030.000000
1030.000000
1030.000000
1030.000000
1030.000000
1030.000000
1030.000000
1030.000000
1030.000000
1030.000000
1030.000000
1030.000000
1030.000000
1030.000000
1030.000000
1030.000000
1030.000000
1030.000000
1030.000000
1030.000000
1030.000000
1030.000000
1030.000000
1030.000000
1030.000000
1030.000000
1030.000000
1030.000000
1030.000000
1030.000000
1030.000000
1030.000000
1030.000000
1030.000000
1030.000000
1030.000000
1030.000000
1030.000000
1030.000000
1030.000000
1030.000000
1030.000000
1030.000000
1030.000000
1030.000000
1030.000000
1030.000000
1030.000000
1030.000000
1030.000000
1030.000000
1030.000000
1030.000000
1030.000000
1030.000000
1030.000000
1030.000000
1030.000000
1030.000000
1030.000000
1030.000000
1030.000000
1030.000000
1030.000000
1030.000000
1030.000000
1030.000000
1030.000000
1030.000000
1030.000000
1030.000000
1030.000000
1030.000000
1030.000000
1030.000000
1030.000000
1030.000000
1030.000000
1030.000000
1030.000000
1030.000000
1030.000000
1030.000000
1030.000000
1030.000000
1030.000000
1030.000000
1030.000000
1030.000000
1030.000000
1030.000000
1030.000000
1030.000000
1030.000000
1030.000000
1030.000000
1030.000000
1030.000000
1030.000000
1030.000000
1030.000000
1030.000000
1030.000000
1030.000000
1030.000000
1030.000000
1030.000000
1030.000000
1030.000000
1030.000000
1030.000000
1030.000000
1030.000000
1030.000000
1030.000000
1030.000000
1030.000000
1030.000000
1030.000000
1030.000000
1030.000000
1030.000000
1030.000000
1030.000000
1030.000000
1030.000000
1030.000000
1030.000000
1030.000000
1030.000000
1030.000000
1030.000000
1030.000000
1030.000000
1030.000000
1030.000000
1030.000000
1030.000000
1030.000000
1030.000000
1030.000000
1030.000000
1030.000000
1030.000000
1030.000000
1030.000000
1030.000000
1030.000000
1030.000000
1030.000000
1030.000000
1030.000000
1030.000000
1030.000000
1030.000000
1030.000000
1030.000000
1030.000000
1030.000000
1030.000000
1030.000000
1030.000000
1030.000000
1030.000000
1030.000000
1030.000000
1030.000000
1030.000000
1030.000000
1030.000000
1030.000000
1030.000000
1030.000000
1030.000000
1030.000000
1030.000000
1030.000000
1030.000000
1030.000000
1030.000000
1030.000000
1030.000000
1030.000000
1030.000000
1030.000000
1030.000000
1030.000000
1030.000000
1030.000000
1030.000000
1030.000000
1030.000000
1030.000000
1030.000000
1030.000000
1030.000000
1030.000000
1030.000000
1030.000000
1030.000000
1030.000000
1030.000000
1030.000000
1030.000000
1030.000000
1030.000000
1030.000000
1030.000000
1030.000000
1030.000000
1030.000000
1030.000000
1030.000000
1030.000000
1030.000000
1030.000000
1030.000000
1030.000000
1030.000000
1030.000000
1030.000000
1030.000000
1030.000000
1030.000000
1030.000000
1030.000000
1030.000000
1030.000000
1030.000000
1030.000000
1030.000000
1030.000000
1030.000000
1030.000000
1030.000000
1030.000000
1030.000000
1030.000000
1030.000000
1030.000000
1030.000000
1030.000000
1030.000000
1030.000000
1030.000000
1030.000000
1030.000000
1030.000000
1030.000000
1030.000000
1030.000000
1030.000000
1030.000000
1030.000000
1030.000000
1030.000000
1030.000000
1030.000000
1030.000000
1030.000000
1030.000000
1030.000000
1030.000000
1030.000000
1030.000000
1030.000000
1030.000000
1030.000000
1030.000000
1030.000000
1030.000000
1030.000000
1030.000000
1030.000000
1030.000000
1030.000000
1030.000000
1030.000000
1030.000000
1030.000000
1030.000000
1030.000000
1030.000000
1030.000000
1030.000000
1030.000000
1030.000000
1030.000000
1030.000000
1030.000000
1030.000000
1030.000000
1030.000000
1030.000000
1030.000000
1030.000000
1030.000000
1030.000000
1030.000000
1030.000000
1030.000000
1030.000000
1030.000000
1030.000000
1030.000000
1030.000000
1030.000000
1030.000000
1030.000000
1030.000000
1030.000000
1030.000000
1030.000000
1030.000000
1030.000000
1030.000000
1030.000000
1030.000000
1030.000000
1030.000000
1030.000000
1030.000000
1030.000000
1030.000000
1030.000000
1030.000000
1030.000000
1030.000000
1030.000000
1030.000000
1030.000000
1030.000000
1030.000000
1030.000000
1030.000000
1030.000000
1030.000000
1030.000000
1030.000000
1030.000000
1030.000000
1030.000000
1030.000000
1030.000000
1030.000000
1030.000000
1030.000000
1030.000000
1030.000000
1030.000000
1030.000000
1030.000000
1030.000000
1030.000000
1030.000000
1030.000000
1030.000000
1030.000000
1030.000000
1030.000000
1030.000000
1030.000000
1030.000000
1030.000000
1030.000000
1030.000000
1030.000000
1030.000000
1030.000000
1030.000000
1030.000000
1030.000000
1030.000000
1030.000000
1030.000000
1030.000000
1030.000000
1030.000000
1030.000000
1030.000000
1030.000000
1030.000000
1030.000000
1030.000000
1030.000000
1030.000000
1030.000000
1030.000000
1030.000000
1030.000000
1030.000000
1030.000000
1030.000000
1030.000000
1030.000000
1030.000000
1030.000000
1030.000000
1030.000000
1030.000000
1030.000000
1030.000000
1030.000000
1030.000000
1030.000000
1030.000000
1030.000000
1030.000000
1030.000000
1030.000000
1030.000000
1030.000000
1030.000000
1030.000000
1030.000000
1030.000000
1030.000000
1030.000000
1030.000000
1030.000000
1030.000000
1030.000000
1030.000000
1030.000000
1030.000000
1030.000000
1030.000000
1030.000000
1030.000000
1030.000000
1030.000000
1030.000000
1030.000000
1030.000000
1030.000000
1030.000000
1030.000000
1030.000000
1030.000000
1030.000000
1030.000000
1030.000000
1030.000000
1030.000000
1030.000000
1030.000000
1030.000000
1030.000000
1030.000000
1030.000000
1030.000000
1030.000000
1030.000000
1030.000000
1030.000000
1030.000000
1030.000000
1030.000000
1030.000000
1030.000000
1030.000000
1030.000000
1030.000000
1030.000000
1030.000000
1030.000000
1030.000000
1030.000000
1030.000000
1030.000000
1030.000000
1030.000000
1030.000000
1030.000000
1030.000000
1030.000000
1030.000000
1030.000000
1030.000000
1030.000000
1030.000000
1030.000000
1030.000000
1030.000000
1030.000000
1030.000000
1030.000000
1030.000000
1030.000000
1030.000000
1030.000000
1030.000000
1030.000000
1030.000000
1030.000000
1030.000000
1030.000000
1030.000000
1030.000000
1030.000000
1030.000000
1030.000000
1030.000000
1030.000000
1030.000000
1030.000000
1030.000000
1030.000000
1030.000000
1030.000000
1030.000000
1030.000000
1030.000000
1030.000000
1030.000000
1030.000000
1030.000000
1030.000000
1030.000000
1030.000000
1030.000000
1030.000000
1030.000000
1030.000000
1030.000000
1030.000000
1030.000000
1030.000000
1030.000000
1030.000000
1030.000000
1030.000000
1030.000000
1030.000000
1030.000000
1030.000000
1030.000000
1030.000000
1030.000000
1030.000000
1030.000000
1030.000000
1030.000000
1030.000000
1030.000000
1030.000000
1030.000000
1030.000000
1030.000000
1030.000000
1030.000000
1030.000000
1030.000000
1030.000000
1030.000000
1030.000000
1030.000000
1030.000000
1030.000000
1030.000000
1030.000000
1030.000000
1030.000000
1030.000000
1030.000000
1030.000000
1030.000000
1030.000000
1030.000000
1030.000000
1030.000000
1030.000000
1030.000000
1030.000000
1030.000000
1030.000000
1030.000000
1030.000000
1030.000000
1030.000000
1030.000000
1030.000000
1030.000000
1030.000000
1030.000000
1030.000000
1030.000000
1030.000000
1030.000000
1030.000000
1030.000000
1030.000000
1030.000000
1030.000000
1030.000000
1030.000000
1030.000000
1030.000000
1030.000000
1030.000000
1030.000000
1030.000000
1030.000000
1030.000000
1030.000000
1030.000000
1030.000000
1030.000000
1030.000000
1030.000000
1030.000000
1030.000000
1030.000000
1030.000000
1030.000000
1030.000000
1030.000000
1030.000000
1030.000000
1030.000000
1030.000000
1030.000000
1030.000000
1030.000000
1030.000000
1030.000000
1030.000000
1030.000000
1030.000000
1030.000000
1030.000000
1030.000000
1030.000000
1030.000000
1030.000000
1030.000000
1030.000000
1030.000000
1030.000000
1030.000000
1030.000000
1030.000000
1030.000000
1030.000000
1030.000000
1030.000000
1030.000000
1030.000000
1030.000000
1030.000000
1030.000000
1030.000000
1030.000000
1030.000000
1030.000000
1030.000000
1030.000000
1030.000000
1030.000000
1030.000000
1030.000000
1030.000000
1030.000000
1030.000000
1030.000000
1030.000000
1030.000000
1030.000000
1030.000000
1030.000000
1030.000000
1030.000000
1030.000000
1030.000000
1030.000000
1030.000000
1030.000000
1030.000000
1030.000000
1030.000000
1030.000000
1030.000000
1030.000000
1030.000000
1030.000000
1030.000000
1030.000000
1030.000000
1030.000000
1030.000000
1030.000000
1030.000000
1030.000000
1030.000000
1030.000000
1030.000000
1030.000000
1030.000000
1030.000000
1030.000000
1030.000000
1030.000000
1030.000000
1030.000000
1030.000000
1030.000000
1030.000000
1030.000000
1030.000000
1030.000000
1030.000000
1030.000000
1030.000000
1030.000000
1030.000000
1030.000000
1030.000000
1030.000000
1030.000000
1030.000000
1030.000000
1030.000000
1030.000000
1030.000000
1030.000000
1030.000000
1030.000000
1030.000000
1030.000000
1030.000000
1030.000000
1030.000000
1030.000000
1030.000000
1030.000000
1030.000000
1030.000000
1030.000000
1030.000000
1030.000000
1030.000000
1030.000000
1030.000000
1030.000000
1030.000000
1030.000000
1030.000000
1030.000000
1030.000000
1030.000000
1030.000000
1030.000000
1030.000000
1030.000000
1030.000000
1030.000000
1030.000000
1030.000000
1030.000000
1030.000000
1030.000000
1030.000000
1030.000000
1030.000000
1030.000000
1030.000000
1030.000000
1030.000000
1030.000000
1030.000000
1030.000000
1030.000000
1030.000000
1030.000000
1030.000000
1030.000000
1030.000000
1030.000000
1030.000000
1030.000000
1030.000000
1030.000000
1030.000000
1030.000000
1030.000000
1030.000000
1030.000000
1030.000000
1030.000000
1030.000000
1030.000000
1030.000000
1030.000000
1030.000000
1030.000000
1030.000000
1030.000000
1030.000000
1030.000000
1030.000000
1030.000000
1030.000000
1030.000000
1030.000000
1030.000000
1030.000000
1030.000000
1030.000000
1030.000000
1030.000000
1030.000000
1030.000000
1030.000000
1030.000000
1030.000000
1030.000000
1030.000000
1030.000000
1030.000000
1030.000000
1030.000000
1030.000000
1030.000000
1030.000000
1030.000000
1030.000000
1030.000000
1030.000000
1030.000000
1030.000000
1030.000000
1030.000000
1030.000000
1030.000000
1030.000000
1030.000000
1030.000000
1030.000000
1030.000000
1030.000000
1030.000000
1030.000000
1030.000000
1030.000000
1030.000000
1030.000000
1030.000000
1030.000000
1030.000000
1030.000000
1030.000000
1030.000000
1030.000000
1030.000000
1030.000000
1030.000000
1030.000000
1030.000000
1030.000000
1030.000000
1030.000000
1030.000000
1030.000000
1030.000000
1030.000000
1030.000000
1030.000000
1030.000000
1030.000000
1030.000000
1030.000000
1030.000000
1030.000000
1030.000000
1030.000000
1030.000000
1030.000000
1030.000000
1030.000000
1030.000000
1030.000000
1030.000000
1030.000000
1030.000000
1030.000000
1030.000000
1030.000000
1030.000000
1030.000000
1030.000000
1030.000000
1030.000000
1030.000000
1030.000000
1030.000000
1030.000000
1030.000000
1030.000000
1030.000000
1030.000000
1030.000000
1030.000000
1030.000000
1030.000000
1030.000000
1030.000000
1030.000000
1030.000000
1030.000000
1030.000000
1030.000000
1030.000000
1030.000000
1030.000000
1030.000000
1030.000000
1030.000000
1030.000000
1030.000000
1030.000000
1030.000000
1030.000000
1030.000000
1030.000000
1030.000000
1030.000000
1030.000000
1030.000000
1030.000000
1030.000000
1030.000000
1030.000000
1030.000000
1030.000000
1030.000000
1030.000000
1030.000000
1030.000000
1030.000000
1030.000000
1030.000000
1030.000000
1030.000000
1030.000000
1030.000000
1030.000000
1030.000000
1030.000000
1030.000000
1030.000000
1030.000000
1030.000000
1030.000000
1030.000000
1030.000000
1030.000000
1030.000000
1030.000000
1030.000000
1030.000000
1030.000000
1030.000000
1030.000000
1030.000000
1030.000000
1030.000000
1030.000000
1030.000000
1030.000000
1030.000000
1030.000000
1030.000000
1030.000000
1030.000000
1030.000000
1030.000000
1030.000000
1030.000000
1030.000000
1030.000000
1030.000000
1030.000000
1030.000000
1030.000000
1030.000000
1030.000000
1030.000000
1030.000000
1030.000000
1030.000000
1030.000000
1030.000000
1030.000000
1030.000000
1030.000000
1030.000000
1030.000000
1030.000000
1030.000000
1030.000000
1030.000000
1030.000000
1030.000000
1030.000000
1030.000000
1030.000000
1030.000000
1030.000000
1030.000000
1030.000000
1030.000000
1030.000000
1030.000000
1030.000000
1030.000000
1030.000000
1030.000000
1030.000000
1030.000000
1030.000000
1030.000000
1030.000000
1030.000000
1030.000000
1030.000000
1030.000000
1030.000000
1030.000000
1030.000000
1030.000000
1030.000000
1030.000000
1030.000000
1030.000000
1030.000000
1030.000000
1030.000000
1030.000000
1030.000000
1030.000000
1030.000000
1030.000000
1030.000000
1030.000000
1030.000000
1030.000000
1030.000000
1030.000000
1030.000000
1030.000000
1030.000000
1030.000000
1030.000000
1030.000000
1030.000000
1030.000000
1030.000000
1030.000000
1030.000000
1030.000000
1030.000000
1030.000000
1030.000000
1030.000000
1030.000000
1030.000000
1030.000000
1030.000000
1030.000000
1030.000000
1030.000000
1030.000000
1030.000000
1030.000000
1030.000000
1030.000000
1030.000000
1030.000000
1030.000000
1030.000000
1030.000000
1030.000000
1030.000000
1030.000000
1030.000000
1030.000000
1030.000000
1030.000000
1030.000000
1030.000000
1030.000000
1030.000000
1030.000000
1030.000000
1030.000000
1030.000000
1030.000000
1030.000000
1030.000000
1030.000000
1030.000000
1030.000000
1030.000000
1030.000000
1030.000000
1030.000000
1030.000000
1030.000000
1030.000000
1030.000000
1030.000000
1030.000000
1030.000000
1030.000000
1030.000000
1030.000000
1030.000000
1030.000000
1030.000000
1030.000000
1030.000000
1030.000000
1030.000000
1030.000000
1030.000000
1030.000000
1030.000000
1030.000000
1030.000000
1030.000000
1030.000000
1030.000000
1030.000000
1030.000000
1030.000000
1030.000000
1030.000000
1030.000000
1030.000000
1030.000000
1030.000000
1030.000000
1030.000000
1030.000000
1030.000000
1030.000000
1030.000000
1030.000000
1030.000000
1030.000000
1030.000000
1030.000000
1030.000000
1030.000000
1030.000000
1030.000000
1030.000000
1030.000000
1030.000000
1030.000000
1030.000000
1030.000000
1030.000000
1030.000000
1030.000000
1030.000000
1030.000000
1030.000000
1030.000000
1030.000000
1030.000000
1030.000000
1030.000000
1030.000000
1030.000000
1030.000000
1030.000000
1030.000000
1030.000000
1030.000000
1030.000000
1030.000000
1030.000000
1030.000000
1030.000000
1030.000000
1030.000000
1030.000000
1030.000000
1030.000000
1030.000000
1030.000000
1030.000000
1030.000000
1030.000000
1030.000000
1030.000000
1030.000000
1030.000000
1030.000000
1030.000000
1030.000000
1030.000000
1030.000000
1030.000000
1030.000000
1030.000000
1030.000000
1030.000000
1030.000000
1030.000000
1030.000000
1030.000000
1030.000000
1030.000000
1030.000000
1030.000000
1030.000000
1030.000000
1030.000000
1030.000000
1030.000000
1030.000000
1030.000000
1030.000000
1030.000000
1030.000000
1030.000000
1030.000000
1030.000000
1030.000000
1030.000000
1030.000000
1030.000000
1030.000000
1030.000000
1030.000000
1030.000000
1030.000000
1030.000000
1030.000000
1030.000000
1030.000000
1030.000000
1030.000000
1030.000000
1030.000000
1030.000000
1030.000000
1030.000000
1030.000000
1030.000000
1030.000000
1030.000000
1030.000000
1030.000000
1030.000000
1030.000000
1030.000000
1030.000000
1030.000000
1030.000000
1030.000000
1030.000000
1030.000000
1030.000000
1030.000000
1030.000000
1030.000000
1030.000000
1030.000000
1030.000000
1030.000000
1030.000000
1030.000000
1030.000000
1030.000000
1030.000000
1030.000000
1030.000000
1030.000000
1030.000000
1030.000000
1030.000000
1030.000000
1030.000000
1030.000000
1030.000000
1030.000000
1030.000000
1030.000000
1030.000000
1030.000000
1030.000000
1030.000000
1030.000000
1030.000000
1030.000000
1030.000000
1030.000000
1030.000000
1030.000000
1030.000000
1030.000000
1030.000000
1030.000000
1030.000000
1030.000000
1030.000000
1030.000000
1030.000000
1030.000000
1030.000000
1030.000000
1030.000000
1030.000000
1030.000000
1030.000000
1030.000000
1030.000000
1030.000000
1030.000000
1030.000000
1030.000000
1030.000000
1030.000000
1030.000000
1030.000000
1030.000000
1030.000000
1030.000000
1030.000000
1030.000000
1030.000000
1030.000000
1030.000000
1030.000000
1030.000000
1030.000000
1030.000000
1030.000000
1030.000000
1030.000000
1030.000000
1030.000000
1030.000000
1030.000000
1030.000000
1030.000000
1030.000000
1030.000000
1030.000000
1030.000000
1030.000000
1030.000000
1030.000000
1030.000000
1030.000000
1030.000000
1030.000000
1030.000000
1030.000000
1030.000000
1030.000000
1030.000000
1030.000000
1030.000000
1030.000000
1030.000000
1030.000000
1030.000000
1030.000000
1030.000000
1030.000000
1030.000000
1030.000000
1030.000000
1030.000000
1030.000000
1030.000000
1030.000000
1030.000000
1030.000000
1030.000000
1030.000000
1030.000000
1030.000000
1030.000000
1030.000000
1030.000000
1030.000000
1030.000000
1030.000000
1030.000000
1030.000000
1030.000000
1030.000000
1030.000000
1030.000000
1030.000000
1030.000000
1030.000000
1030.000000
1030.000000
1030.000000
1030.000000
1030.000000
1030.000000
1030.000000
1030.000000
1030.000000
1030.000000
1030.000000
1030.000000
1030.000000
1030.000000
1030.000000
1030.000000
1030.000000
1030.000000
1030.000000
1030.000000
1030.000000
1030.000000
1030.000000
1030.000000
1030.000000
1030.000000
1030.000000
1030.000000
1030.000000
1030.000000
1030.000000
1030.000000
1030.000000
1030.000000
1030.000000
1030.000000
1030.000000
1030.000000
1030.000000
1030.000000
1030.000000
1030.000000
1030.000000
1030.000000
1030.000000
1030.000000
1030.000000
1030.000000
1030.000000
1030.000000
1030.000000
1030.000000
1030.000000
1030.000000
1030.000000
1030.000000
1030.000000
1030.000000
1030.000000
1030.000000
1030.000000
1030.000000
1030.000000
1030.000000
1030.000000
1030.000000
1030.000000
1030.000000
1030.000000
1030.000000
1030.000000
1030.000000
1030.000000
1030.000000
1030.000000
1030.000000
1030.000000
1030.000000
1030.000000
1030.000000
1030.000000
1030.000000
1030.000000
1030.000000
1030.000000
1030.000000
1030.000000
1030.000000
1030.000000
1030.000000
1030.000000
1030.000000
1030.000000
1030.000000
1030.000000
1030.000000
1030.000000
1030.000000
1030.000000
1030.000000
1030.000000
1030.000000
1030.000000
1030.000000
1030.000000
1030.000000
1030.000000
1030.000000
1030.000000
1030.000000
1030.000000
1030.000000
1030.000000
1030.000000
1030.000000
1030.000000
1030.000000
1030.000000
1030.000000
1030.000000
1030.000000
1030.000000
1030.000000
1030.000000
1030.000000
1030.000000
1030.000000
1030.000000
1030.000000
1030.000000
1030.000000
1030.000000
1030.000000
1030.000000
1030.000000
1030.000000
1030.000000
1030.000000
1030.000000
1030.000000
1030.000000
1030.000000
1030.000000
1030.000000
1030.000000
1030.000000
1030.000000
1030.000000
1030.000000
1030.000000
1030.000000
1030.000000
1030.000000
1030.000000
1030.000000
1030.000000
1030.000000
1030.000000
1030.000000
1030.000000
1030.000000
1030.000000
1030.000000
1030.000000
1030.000000
1030.000000
1030.000000
1030.000000
1030.000000
1030.000000
1030.000000
1030.000000
1030.000000
1030.000000
1030.000000
1030.000000
1030.000000
1030.000000
1030.000000
1030.000000
1030.000000
1030.000000
1030.000000
1030.000000
1030.000000
1030.000000
1030.000000
1030.000000
1030.000000
1030.000000
1030.000000
1030.000000
1030.000000
1030.000000
1030.000000
1030.000000
1030.000000
1030.000000
1030.000000
1030.000000
1030.000000
1030.000000
1030.000000
1030.000000
1030.000000
1030.000000
1030.000000
1030.000000
1030.000000
1030.000000
1030.000000
1030.000000
1030.000000
1030.000000
1030.000000
1030.000000
1030.000000
1030.000000
1030.000000
1030.000000
1030.000000
1030.000000
1030.000000
1030.000000
1030.000000
1030.000000
1030.000000
1030.000000
1030.000000
1030.000000
1030.000000
1030.000000
1030.000000
1030.000000
1030.000000
1030.000000
1030.000000
1030.000000
1030.000000
1030.000000
1030.000000
1030.000000
1030.000000
1030.000000
1030.000000
1030.000000
1030.000000
1030.000000
1030.000000
1030.000000
1030.000000
1030.000000
1030.000000
1030.000000
1030.000000
1030.000000
1030.000000
1030.000000
1030.000000
1030.000000
1030.000000
1030.000000
1030.000000
1030.000000
1030.000000
1030.000000
1030.000000
1030.000000
1030.000000
1030.000000
1030.000000
1030.000000
1030.000000
1030.000000
1030.000000
1030.000000
1030.000000
1030.000000
1030.000000
1030.000000
1030.000000
1030.000000
1030.000000
1030.000000
1030.000000
1030.000000
1030.000000
1030.000000
1030.000000
1030.000000
1030.000000
1030.000000
1030.000000
1030.000000
1030.000000
1030.000000
1030.000000
1030.000000
1030.000000
1030.000000
1030.000000
1030.000000
1030.000000
1030.000000
1030.000000
1030.000000
1030.000000
1030.000000
1030.000000
1030.000000
1030.000000
1030.000000
1030.000000
1030.000000
1030.000000
1030.000000
1030.000000
1030.000000
1030.000000
1030.000000
1030.000000
1030.000000
1030.000000
1030.000000
1030.000000
1030.000000
1030.000000
1030.000000
1030.000000
1030.000000
1030.000000
1030.000000
1030.000000
1030.000000
1030.000000
1030.000000
1030.000000
1030.000000
1030.000000
1030.000000
1030.000000
1030.000000
1030.000000
1030.000000
1030.000000
1030.000000
1030.000000
1030.000000
1030.000000
1030.000000
1030.000000
1030.000000
1030.000000
1030.000000
1030.000000
1030.000000
1030.000000
1030.000000
1030.000000
1030.000000
1030.000000
1030.000000
1030.000000
1030.000000
1030.000000
1030.000000
1030.000000
1030.000000
1030.000000
1030.000000
1030.000000
1030.000000
1030.000000
1030.000000
1030.000000
1030.000000
1030.000000
1030.000000
1030.000000
1030.000000
1030.000000
1030.000000
1030.000000
1030.000000
1030.000000
1030.000000
1030.000000
1030.000000
1030.000000
1030.000000
1030.000000
1030.000000
1030.000000
1030.000000
1030.000000
1030.000000
1030.000000
1030.000000
1030.000000
1030.000000
1030.000000
1030.000000
1030.000000
1030.000000
1030.000000
1030.000000
1030.000000
1030.000000
1030.000000
1030.000000
1030.000000
1030.000000
1030.000000
1030.000000
1030.000000
1030.000000
1030.000000
1030.000000
1030.000000
1030.000000
1030.000000
1030.000000
1030.000000
1030.000000
1030.000000
1030.000000
1030.000000
1030.000000
1030.000000
1030.000000
1030.000000
1030.000000
1030.000000
1030.000000
1030.000000
1030.000000
1030.000000
1030.000000
1030.000000
1030.000000
1030.000000
1030.000000
1030.000000
1030.000000
1030.000000
1030.000000
1030.000000
1030.000000
1030.000000
1030.000000
1030.000000
1030.000000
1030.000000
1030.000000
1030.000000
1030.000000
1030.000000
1030.000000
1030.000000
1030.000000
1030.000000
1030.000000
1030.000000
1030.000000
1030.000000
1030.000000
1030.000000
1030.000000
1030.000000
1030.000000
1030.000000
1030.000000
1030.000000
1030.000000
1030.000000
1030.000000
1030.000000
1030.000000
1030.000000
1030.000000
1030.000000
1030.000000
1030.000000
1030.000000
1030.000000
1030.000000
1030.000000
1030.000000
1030.000000
1030.000000
1030.000000
1030.000000
1030.000000
1030.000000
1030.000000
1030.000000
1030.000000
1030.000000
1030.000000
1030.000000
1030.000000
1030.000000
1030.000000
1030.000000
1030.000000
1030.000000
1030.000000
1030.000000
1030.000000
1030.000000
1030.000000
1030.000000
1030.000000
1030.000000
1030.000000
1030.000000
1030.000000
1030.000000
1030.000000
1030.000000
1030.000000
1030.000000
1030.000000
1030.000000
1030.000000
1030.000000
1030.000000
1030.000000
1030.000000
1030.000000
1030.000000
1030.000000
1030.000000
1030.000000
1030.000000
1030.000000
1030.000000
1030.000000
1030.000000
1030.000000
1030.000000
1030.000000
1030.000000
1030.000000
1030.000000
1030.000000
1030.000000
1030.000000
1030.000000
1030.000000
1030.000000
1030.000000
1030.000000
1030.000000
1030.000000
1030.000000
1030.000000
1030.000000
1030.000000
1030.000000
1030.000000
1030.000000
1030.000000
1030.000000
1030.000000
1030.000000
1030.000000
1030.000000
1030.000000
1030.000000
1030.000000
1030.000000
1030.000000
1030.000000
1030.000000
1030.000000
1030.000000
1030.000000
1030.000000
1030.000000
1030.000000
1030.000000
1030.000000
1030.000000
1030.000000
1030.000000
1030.000000
1030.000000
1030.000000
1030.000000
1030.000000
1030.000000
1030.000000
1030.000000
1030.000000
1030.000000
1030.000000
1030.000000
1030.000000
1030.000000
1030.000000
1030.000000
1030.000000
1030.000000
1030.000000
1030.000000
1030.000000
1030.000000
1030.000000
1030.000000
1030.000000
1030.000000
1030.000000
1030.000000
1030.000000
1030.000000
1030.000000
1030.000000
1030.000000
1030.000000
1030.000000
1030.000000
1030.000000
1030.000000
1030.000000
1030.000000
1030.000000
1030.000000
1030.000000
1030.000000
1030.000000
1030.000000
1030.000000
1030.000000
1030.000000
1030.000000
1030.000000
1030.000000
1030.000000
1030.000000
1030.000000
1030.000000
1030.000000
1030.000000
1030.000000
1030.000000
1030.000000
1030.000000
1030.000000
1030.000000
1030.000000
1030.000000
1030.000000
1030.000000
1030.000000
1030.000000
1030.000000
1030.000000
1030.000000
1030.000000
1030.000000
1030.000000
1030.000000
1030.000000
1030.000000
1030.000000
1030.000000
1030.000000
1030.000000
1030.000000
1030.000000
1030.000000
1030.000000
1030.000000
1030.000000
1030.000000
1030.000000
1030.000000
1030.000000
1030.000000
1030.000000
1030.000000
1030.000000
1030.000000
1030.000000
1030.000000
1030.000000
1030.000000
1030.000000
1030.000000
1030.000000
1030.000000
1030.000000
1030.000000
1030.000000
1030.000000
1030.000000
1030.000000
1030.000000
1030.000000
1030.000000
1030.000000
1030.000000
1030.000000
1030.000000
1030.000000
1030.000000
1030.000000
1030.000000
1030.000000
1030.000000
1030.000000
1030.000000
1030.000000
1030.000000
1030.000000
1030.000000
1030.000000
1030.000000
1030.000000
1030.000000
1030.000000
1030.000000
1030.000000
1030.000000
1030.000000
1030.000000
1030.000000
1030.000000
1030.000000
1030.000000
1030.000000
1030.000000
1030.000000
1030.000000
1030.000000
1030.000000
1030.000000
1030.000000
1030.000000
1030.000000
1030.000000
1030.000000
1030.000000
1030.000000
1030.000000
1030.000000
1030.000000
1030.000000
1030.000000
1030.000000
1030.000000
1030.000000
1030.000000
1030.000000
1030.000000
1030.000000
1030.000000
1030.000000
1030.000000
1030.000000
1030.000000
1030.000000
1030.000000
1030.000000
1030.000000
1030.000000
1030.000000
1030.000000
1030.000000
1030.000000
1030.000000
1030.000000
1030.000000
1030.000000
1030.000000
1030.000000
1030.000000
1030.000000
1030.000000
1030.000000
1030.000000
1030.000000
1030.000000
1030.000000
1030.000000
1030.000000
1030.000000
1030.000000
1030.000000
1030.000000
1030.000000
1030.000000
1030.000000
1030.000000
1030.000000
1030.000000
1030.000000
1030.000000
1030.000000
1030.000000
1030.000000
1030.000000
1030.000000
1030.000000
1030.000000
1030.000000
1030.000000
1030.000000
1030.000000
1030.000000
1030.000000
1030.000000
1030.000000
1030.000000
1030.000000
1030.000000
1030.000000
1030.000000
1030.000000
1030.000000
1030.000000
1030.000000
1030.000000
1030.000000
1030.000000
1030.000000
1030.000000
1030.000000
1030.000000
1030.000000
1030.000000
1030.000000
1030.000000
1030.000000
1030.000000
1030.000000
1030.000000
1030.000000
1030.000000
1030.000000
1030.000000
1030.000000
1030.000000
1030.000000
1030.000000
1030.000000
1030.000000
1030.000000
1030.000000
1030.000000
1030.000000
1030.000000
1030.000000
1030.000000
1030.000000
1030.000000
1030.000000
1030.000000
1030.000000
1030.000000
1030.000000
1030.000000
1030.000000
1030.000000
1030.000000
1030.000000
1030.000000
1030.000000
1030.000000
1030.000000
1030.000000
1030.000000
1030.000000
1030.000000
1030.000000
1030.000000
1030.000000
1030.000000
1030.000000
1030.000000
1030.000000
1030.000000
1030.000000
1030.000000
1030.000000
1030.000000
1030.000000
1030.000000
1030.000000
1030.000000
1030.000000
1030.000000
1030.000000
1030.000000
1030.000000
1030.000000
1030.000000
1030.000000
1030.000000
1030.000000
1030.000000
1030.000000
1030.000000
1030.000000
1030.000000
1030.000000
1030.000000
1030.000000
1030.000000
1030.000000
1030.000000
1030.000000
1030.000000
1030.000000
1030.000000
1030.000000
1030.000000
1030.000000
1030.000000
1030.000000
1030.000000
1030.000000
1030.000000
1030.000000
1030.000000
1030.000000
1030.000000
1030.000000
1030.000000
1030.000000
1030.000000
1030.000000
1030.000000
1030.000000
1030.000000
1030.000000
1030.000000
1030.000000
1030.000000
1030.000000
1030.000000
1030.000000
1030.000000
1030.000000
1030.000000
1030.000000
1030.000000
1030.000000
1030.000000
1030.000000
1030.000000
1030.000000
1030.000000
1030.000000
1030.000000
1030.000000
1030.000000
1030.000000
1030.000000
1030.000000
1030.000000
1030.000000
1030.000000
1030.000000
1030.000000
1030.000000
1030.000000
1030.000000
1030.000000
1030.000000
1030.000000
1030.000000
1030.000000
1030.000000
1030.000000
1030.000000
1030.000000
1030.000000
1030.000000
1030.000000
1030.000000
1030.000000
1030.000000
1030.000000
1030.000000
1030.000000
1030.000000
1030.000000
1030.000000
1030.000000
1030.000000
1030.000000
1030.000000
1030.000000
1030.000000
1030.000000
1030.000000
1030.000000
1030.000000
1030.000000
1030.000000
1030.000000
1030.000000
1030.000000
1030.000000
1030.000000
1030.000000
1030.000000
1030.000000
1030.000000
1030.000000
1030.000000
1030.000000
1030.000000
1030.000000
1030.000000
1030.000000
1030.000000
1030.000000
1030.000000
1030.000000
1030.000000
1030.000000
1030.000000
1030.000000
1030.000000
1030.000000
1030.000000
1030.000000
1030.000000
1030.000000
1030.000000
1030.000000
1030.000000
1030.000000
1030.000000
1030.000000
1030.000000
1030.000000
1030.000000
1030.000000
1030.000000
1030.000000
1030.000000
1030.000000
1030.000000
1030.000000
1030.000000
1030.000000
1030.000000
1030.000000
1030.000000
1030.000000
1030.000000
1030.000000
1030.000000
1030.000000
1030.000000
1030.000000
1030.000000
1030.000000
1030.000000
1030.000000
1030.000000
1030.000000
1030.000000
1030.000000
1030.000000
1030.000000
1030.000000
1030.000000
1030.000000
1030.000000
1030.000000
1030.000000
1030.000000
1030.000000
1030.000000
1030.000000
1030.000000
1030.000000
1030.000000
1030.000000
1030.000000
1030.000000
1030.000000
1030.000000
1030.000000
1030.000000
1030.000000
1030.000000
1030.000000
1030.000000
1030.000000
1030.000000
1030.000000
1030.000000
1030.000000
1030.000000
1030.000000
1030.000000
1030.000000
1030.000000
1030.000000
1030.000000
1030.000000
1030.000000
1030.000000
1030.000000
1030.000000
1030.000000
1030.000000
1030.000000
1030.000000
1030.000000
1030.000000
1030.000000
1030.000000
1030.000000
1030.000000
1030.000000
1030.000000
1030.000000
1030.000000
1030.000000
1030.000000
1030.000000
1030.000000
1030.000000
1030.000000
1030.000000
1030.000000
1030.000000
1030.000000
1030.000000
1030.000000
1030.000000
1030.000000
1030.000000
1030.000000
1030.000000
1030.000000
1030.000000
1030.000000
1030.000000
1030.000000
1030.000000
1030.000000
1030.000000
1030.000000
1030.000000
1030.000000
1030.000000
1030.000000
1030.000000
1030.000000
1030.000000
1030.000000
1030.000000
1030.000000
1030.000000
1030.000000
1030.000000
1030.000000
1030.000000
1030.000000
1030.000000
1030.000000
1030.000000
1030.000000
1030.000000
1030.000000
1030.000000
1030.000000
1030.000000
1030.000000
1030.000000
1030.000000
1030.000000
1030.000000
1030.000000
1030.000000
1030.000000
1030.000000
1030.000000
1030.000000
1030.000000
1030.000000
1030.000000
1030.000000
1030.000000
1030.000000
1030.000000
1030.000000
1030.000000
1030.000000
1030.000000
1030.000000
1030.000000
1030.000000
1030.000000
1030.000000
1030.000000
1030.000000
1030.000000
1030.000000
1030.000000
1030.000000
1030.000000
1030.000000
1030.000000
1030.000000
1030.000000
1030.000000
1030.000000
1030.000000
1030.000000
1030.000000
1030.000000
1030.000000
1030.000000
1030.000000
1030.000000
1030.000000
1030.000000
1030.000000
1030.000000
1030.000000
1030.000000
1030.000000
1030.000000
1030.000000
1030.000000
1030.000000
1030.000000
1030.000000
1030.000000
1030.000000
1030.000000
1030.000000
1030.000000
1030.000000
1030.000000
1030.000000
1030.000000
1030.000000
1030.000000
1030.000000
1030.000000
1030.000000
1030.000000
1030.000000
1030.000000
1030.000000
1030.000000
1030.000000
1030.000000
1030.000000
1030.000000
1030.000000
1030.000000
1030.000000
1030.000000
1030.000000
1030.000000
1030.000000
1030.000000
1030.000000
1030.000000
1030.000000
1030.000000
1030.000000
1030.000000
1030.000000
1030.000000
1030.000000
1030.000000
1030.000000
1030.000000
1030.000000
1030.000000
1030.000000
1030.000000
1030.000000
1030.000000
1030.000000
1030.000000
1030.000000
1030.000000
1030.000000
1030.000000
1030.000000
1030.000000
1030.000000
1030.000000
1030.000000
1030.000000
1030.000000
1030.000000
1030.000000
1030.000000
1030.000000
1030.000000
1030.000000
1030.000000
1030.000000
1030.000000
1030.000000
1030.000000
1030.000000
1030.000000
1030.000000
1030.000000
1030.000000
1030.000000
1030.000000
1030.000000
1030.000000
1030.000000
1030.000000
1030.000000
1030.000000
1030.000000
1030.000000
1030.000000
1030.000000
1030.000000
1030.000000
1030.000000
1030.000000
1030.000000
1030.000000
1030.000000
1030.000000
1030.000000
1030.000000
1030.000000
1030.000000
1030.000000
1030.000000
1030.000000
1030.000000
1030.000000
1030.000000
1030.000000
1030.000000
1030.000000
1030.000000
1030.000000
1030.000000
1030.000000
1030.000000
1030.000000
1030.000000
1030.000000
1030.000000
1030.000000
1030.000000
1030.000000
1030.000000
1030.000000
1030.000000
1030.000000
1030.000000
1030.000000
1030.000000
1030.000000
1030.000000
1030.000000
1030.000000
1030.000000
1030.000000
1030.000000
1030.000000
1030.000000
1030.000000
1030.000000
1030.000000
1030.000000
1030.000000
1030.000000
1030.000000
1030.000000
1030.000000
1030.000000
1030.000000
1030.000000
1030.000000
1030.000000
1030.000000
1030.000000
1030.000000
1030.000000
1030.000000
1030.000000
1030.000000
1030.000000
1030.000000
1030.000000
1030.000000
1030.000000
1030.000000
1030.000000
1030.000000
1030.000000
1030.000000
1030.000000
1030.000000
1030.000000
1030.000000
1030.000000
1030.000000
1030.000000
1030.000000
1030.000000
1030.000000
1030.000000
1030.000000
1030.000000
1030.000000
1030.000000
1030.000000
1030.000000
1030.000000
1030.000000
1030.000000
1030.000000
1030.000000
1030.000000
1030.000000
1030.000000
1030.000000
1030.000000
1030.000000
1030.000000
1030.000000
1030.000000
[truncated: 1,371,741 more chars]
