# Supplementary material for: ISWFoam: A numerical model for internal solitary wave simulation in continuously stratified fluids
Source: Copernicus journal article supplement (doi:10.5194/gmd-2021-102), 2021-05-27
Supplement: Supplementary file 2 [file gmd-2021-102-supplement.zip › ISWFoam/tutorial/FlatBottom-DJLES/0.orig/initialFieldsU]

velocityProfile
List<vector>
150000
(
(-0.000000  0.000000  -0.000000)
(-0.000000  0.000000  0.000000)
(-0.000000  0.000000  -0.000000)
(-0.000000  0.000000  0.000000)
(-0.000000  0.000000  -0.000000)
(-0.000000  0.000000  -0.000000)
(-0.000000  0.000000  -0.000000)
(-0.000000  0.000000  0.000000)
(-0.000000  0.000000  -0.000000)
(-0.000000  0.000000  -0.000000)
(-0.000000  0.000000  -0.000000)
(-0.000000  0.000000  0.000000)
(-0.000000  0.000000  -0.000000)
(-0.000000  0.000000  -0.000000)
(-0.000000  0.000000  -0.000000)
(-0.000000  0.000000  0.000000)
(-0.000000  0.000000  0.000000)
(-0.000000  0.000000  0.000000)
(-0.000000  0.000000  0.000000)
(-0.000000  0.000000  0.000000)
(-0.000000  0.000000  -0.000000)
(-0.000000  0.000000  0.000000)
(-0.000000  0.000000  -0.000000)
(-0.000000  0.000000  -0.000000)
(-0.000000  0.000000  -0.000000)
(-0.000000  0.000000  0.000000)
(-0.000000  0.000000  0.000000)
(-0.000000  0.000000  0.000000)
(-0.000000  0.000000  0.000000)
(-0.000000  0.000000  0.000000)
(-0.000000  0.000000  -0.000000)
(-0.000000  0.000000  -0.000000)
(-0.000000  0.000000  -0.000000)
(-0.000000  0.000000  -0.000000)
(-0.000000  0.000000  -0.000000)
(-0.000000  0.000000  -0.000000)
(-0.000000  0.000000  -0.000000)
(-0.000000  0.000000  -0.000000)
(-0.000000  0.000000  0.000000)
(-0.000000  0.000000  -0.000000)
(-0.000000  0.000000  0.000000)
(-0.000000  0.000000  0.000000)
(-0.000000  0.000000  0.000000)
(-0.000000  0.000000  0.000000)
(-0.000000  0.000000  0.000000)
(-0.000000  0.000000  0.000000)
(-0.000000  0.000000  0.000000)
(-0.000000  0.000000  -0.000000)
(-0.000000  0.000000  0.000000)
(-0.000000  0.000000  -0.000000)
(-0.000000  0.000000  -0.000000)
(-0.000000  0.000000  0.000000)
(-0.000000  0.000000  0.000000)
(-0.000000  0.000000  0.000000)
(-0.000000  0.000000  -0.000000)
(-0.000000  0.000000  0.000000)
(-0.000000  0.000000  0.000000)
(-0.000000  0.000000  -0.000000)
(-0.000000  0.000000  -0.000000)
(-0.000000  0.000000  -0.000000)
(-0.000000  0.000000  -0.000000)
(0.000000  0.000000  0.000000)
(0.000000  0.000000  -0.000000)
(0.000000  0.000000  -0.000000)
(0.000000  0.000000  -0.000000)
(-0.000000  0.000000  0.000000)
(-0.000000  0.000000  0.000000)
(-0.000000  0.000000  0.000000)
(-0.000000  0.000000  0.000000)
(-0.000000  0.000000  -0.000000)
(-0.000000  0.000000  -0.000000)
(-0.000000  0.000000  -0.000000)
(-0.000000  0.000000  -0.000000)
(-0.000000  0.000000  -0.000000)
(-0.000000  0.000000  0.000000)
(-0.000000  0.000000  0.000000)
(-0.000000  0.000000  0.000000)
(-0.000000  0.000000  0.000000)
(-0.000000  0.000000  0.000000)
(-0.000000  0.000000  0.000000)
(-0.000000  0.000000  0.000000)
(-0.000000  0.000000  0.000000)
(-0.000000  0.000000  0.000000)
(-0.000000  0.000000  -0.000000)
(-0.000000  0.000000  0.000000)
(-0.000000  0.000000  0.000000)
(-0.000000  0.000000  0.000000)
(-0.000000  0.000000  0.000000)
(-0.000000  0.000000  0.000000)
(-0.000000  0.000000  0.000000)
(-0.000000  0.000000  0.000000)
(-0.000000  0.000000  0.000000)
(-0.000000  0.000000  0.000000)
(-0.000000  0.000000  0.000000)
(-0.000000  0.000000  -0.000000)
(-0.000000  0.000000  -0.000000)
(-0.000000  0.000000  -0.000000)
(-0.000000  0.000000  -0.000000)
(-0.000000  0.000000  -0.000000)
(-0.000000  0.000000  -0.000000)
(-0.000000  0.000000  -0.000000)
(-0.000000  0.000000  -0.000000)
(-0.000000  0.000000  0.000000)
(-0.000000  0.000000  0.000000)
(-0.000000  0.000000  0.000000)
(-0.000000  0.000000  0.000000)
(-0.000000  0.000000  0.000000)
(-0.000000  0.000000  0.000000)
(-0.000000  0.000000  -0.000000)
(-0.000000  0.000000  -0.000000)
(-0.000000  0.000000  -0.000000)
(-0.000000  0.000000  -0.000000)
(0.000000  0.000000  -0.000000)
(0.000000  0.000000  -0.000000)
(0.000000  0.000000  -0.000000)
(0.000000  0.000000  -0.000000)
(0.000000  0.000000  -0.000000)
(0.000000  0.000000  -0.000000)
(0.000000  0.000000  -0.000000)
(0.000000  0.000000  0.000000)
(0.000000  0.000000  -0.000000)
(0.000000  0.000000  -0.000000)
(0.000000  0.000000  -0.000000)
(0.000000  0.000000  -0.000000)
(0.000000  0.000000  -0.000000)
(0.000000  0.000000  -0.000000)
(0.000000  0.000000  -0.000000)
(0.000000  0.000000  0.000000)
(0.000000  0.000000  -0.000000)
(0.000000  0.000000  -0.000000)
(0.000000  0.000000  -0.000000)
(0.000000  0.000000  -0.000000)
(0.000000  0.000000  -0.000000)
(0.000000  0.000000  -0.000000)
(0.000000  0.000000  0.000000)
(0.000000  0.000000  -0.000000)
(0.000000  0.000000  -0.000000)
(0.000000  0.000000  -0.000000)
(0.000000  0.000000  -0.000000)
(0.000000  0.000000  -0.000000)
(0.000000  0.000000  0.000000)
(0.000000  0.000000  -0.000000)
(0.000000  0.000000  0.000000)
(0.000000  0.000000  -0.000000)
(0.000000  0.000000  0.000000)
(0.000000  0.000000  -0.000000)
(0.000000  0.000000  -0.000000)
(0.000000  0.000000  -0.000000)
(0.000000  0.000000  -0.000000)
(0.000000  0.000000  -0.000000)
(0.000000  0.000000  -0.000000)
(0.000000  0.000000  0.000000)
(0.000000  0.000000  -0.000000)
(0.000000  0.000000  0.000000)
(0.000000  0.000000  0.000000)
(0.000000  0.000000  0.000000)
(0.000000  0.000000  0.000000)
(0.000000  0.000000  -0.000000)
(0.000000  0.000000  -0.000000)
(0.000000  0.000000  -0.000000)
(0.000000  0.000000  -0.000000)
(0.000000  0.000000  -0.000000)
(0.000000  0.000000  -0.000000)
(0.000000  0.000000  -0.000000)
(0.000000  0.000000  -0.000000)
(0.000000  0.000000  -0.000000)
(0.000000  0.000000  -0.000000)
(0.000000  0.000000  0.000000)
(0.000000  0.000000  0.000000)
(0.000000  0.000000  -0.000000)
(0.000000  0.000000  0.000000)
(0.000000  0.000000  0.000000)
(0.000000  0.000000  -0.000000)
(0.000000  0.000000  -0.000000)
(0.000000  0.000000  0.000000)
(0.000000  0.000000  0.000000)
(0.000000  0.000000  0.000000)
(0.000000  0.000000  0.000000)
(0.000000  0.000000  0.000000)
(0.000000  0.000000  -0.000000)
(0.000000  0.000000  0.000000)
(0.000000  0.000000  -0.000000)
(0.000000  0.000000  -0.000000)
(0.000000  0.000000  -0.000000)
(0.000000  0.000000  -0.000000)
(0.000000  0.000000  -0.000000)
(0.000000  0.000000  -0.000000)
(0.000000  0.000000  -0.000000)
(0.000000  0.000000  -0.000000)
(0.000000  0.000000  -0.000000)
(0.000000  0.000000  -0.000000)
(0.000000  0.000000  -0.000000)
(0.000000  0.000000  -0.000000)
(0.000000  0.000000  -0.000000)
(0.000000  0.000000  -0.000000)
(0.000000  0.000000  -0.000000)
(0.000000  0.000000  -0.000000)
(0.000000  0.000000  -0.000000)
(0.000000  0.000000  -0.000000)
(0.000000  0.000000  -0.000000)
(0.000000  0.000000  -0.000000)
(0.000000  0.000000  -0.000000)
(0.000000  0.000000  -0.000000)
(0.000000  0.000000  -0.000000)
(0.000000  0.000000  -0.000000)
(0.000000  0.000000  -0.000000)
(0.000000  0.000000  -0.000000)
(0.000000  0.000000  -0.000000)
(0.000000  0.000000  -0.000000)
(0.000000  0.000000  -0.000000)
(0.000000  0.000000  -0.000000)
(0.000000  0.000000  -0.000000)
(0.000000  0.000000  -0.000000)
(0.000000  0.000000  -0.000000)
(0.000000  0.000000  -0.000000)
(0.000000  0.000000  -0.000000)
(0.000000  0.000000  -0.000000)
(0.000000  0.000000  -0.000000)
(0.000000  0.000000  -0.000000)
(0.000000  0.000000  -0.000000)
(0.000000  0.000000  -0.000000)
(0.000000  0.000000  -0.000000)
(0.000000  0.000000  -0.000000)
(0.000000  0.000000  -0.000000)
(0.000000  0.000000  -0.000000)
(0.000000  0.000000  -0.000000)
(0.000000  0.000000  -0.000000)
(0.000000  0.000000  -0.000000)
(0.000000  0.000000  -0.000000)
(0.000000  0.000000  -0.000000)
(0.000000  0.000000  -0.000000)
(0.000000  0.000000  -0.000000)
(0.000000  0.000000  -0.000000)
(0.000000  0.000000  -0.000000)
(0.000000  0.000000  -0.000000)
(0.000000  0.000000  -0.000000)
(0.000000  0.000000  -0.000000)
(0.000000  0.000000  -0.000000)
(0.000000  0.000000  -0.000000)
(0.000000  0.000000  -0.000000)
(0.000000  0.000000  -0.000000)
(0.000000  0.000000  -0.000000)
(0.000000  0.000000  -0.000000)
(0.000000  0.000000  -0.000000)
(0.000000  0.000000  -0.000000)
(0.000000  0.000000  -0.000000)
(0.000000  0.000000  -0.000000)
(0.000000  0.000000  -0.000000)
(0.000000  0.000000  -0.000000)
(0.000000  0.000000  -0.000000)
(0.000000  0.000000  -0.000000)
(0.000000  0.000000  -0.000000)
(0.000000  0.000000  -0.000000)
(0.000000  0.000000  -0.000000)
(0.000000  0.000000  -0.000000)
(0.000000  0.000000  -0.000000)
(0.000000  0.000000  -0.000000)
(0.000000  0.000000  -0.000000)
(0.000000  0.000000  -0.000000)
(0.000000  0.000000  -0.000000)
(0.000000  0.000000  -0.000000)
(0.000000  0.000000  -0.000000)
(0.000000  0.000000  -0.000000)
(0.000000  0.000000  -0.000000)
(0.000000  0.000000  -0.000000)
(0.000000  0.000000  -0.000000)
(0.000000  0.000000  -0.000000)
(0.000000  0.000000  -0.000000)
(0.000000  0.000000  -0.000000)
(0.000000  0.000000  -0.000000)
(0.000000  0.000000  -0.000000)
(0.000000  0.000000  -0.000000)
(0.000000  0.000000  -0.000000)
(0.000000  0.000000  -0.000000)
(0.000000  0.000000  -0.000000)
(0.000000  0.000000  -0.000000)
(0.000000  0.000000  -0.000000)
(0.000000  0.000000  -0.000000)
(0.000000  0.000000  -0.000000)
(0.000000  0.000000  -0.000000)
(0.000000  0.000000  -0.000000)
(0.000000  0.000000  -0.000000)
(0.000000  0.000000  -0.000000)
(0.000000  0.000000  -0.000000)
(0.000000  0.000000  -0.000000)
(0.000000  0.000000  -0.000000)
(0.000000  0.000000  -0.000000)
(0.000000  0.000000  -0.000000)
(0.000000  0.000000  -0.000000)
(0.000000  0.000000  -0.000000)
(0.000000  0.000000  -0.000000)
(0.000000  0.000000  -0.000000)
(0.000000  0.000000  -0.000000)
(0.000000  0.000000  -0.000000)
(0.000000  0.000000  -0.000000)
(0.000000  0.000000  -0.000000)
(0.000000  0.000000  -0.000000)
(0.000000  0.000000  -0.000000)
(0.000000  0.000000  -0.000000)
(0.000000  0.000000  -0.000000)
(0.000000  0.000000  -0.000000)
(0.000000  0.000000  -0.000000)
(0.000000  0.000000  -0.000000)
(0.000000  0.000000  -0.000000)
(0.000000  0.000000  -0.000000)
(0.000000  0.000000  -0.000000)
(0.000000  0.000000  -0.000000)
(0.000000  0.000000  -0.000000)
(0.000000  0.000000  -0.000000)
(0.000000  0.000000  -0.000000)
(0.000000  0.000000  -0.000000)
(0.000000  0.000000  -0.000000)
(0.000000  0.000000  -0.000000)
(0.000000  0.000000  -0.000000)
(0.000000  0.000000  -0.000000)
(0.000000  0.000000  -0.000000)
(0.000000  0.000000  -0.000000)
(0.000000  0.000000  -0.000000)
(0.000000  0.000000  -0.000000)
(0.000000  0.000000  -0.000000)
(0.000000  0.000000  -0.000000)
(0.000000  0.000000  -0.000000)
(0.000000  0.000000  -0.000000)
(0.000000  0.000000  -0.000000)
(0.000000  0.000000  -0.000000)
(0.000000  0.000000  -0.000000)
(0.000000  0.000000  -0.000000)
(0.000000  0.000000  -0.000000)
(0.000000  0.000000  -0.000000)
(0.000000  0.000000  -0.000000)
(0.000000  0.000000  -0.000000)
(0.000000  0.000000  -0.000000)
(0.000000  0.000000  -0.000000)
(0.000000  0.000000  -0.000000)
(0.000000  0.000000  -0.000000)
(0.000000  0.000000  -0.000000)
(0.000000  0.000000  -0.000000)
(0.000000  0.000000  -0.000000)
(0.000000  0.000000  -0.000000)
(0.000000  0.000000  -0.000000)
(0.000000  0.000000  -0.000000)
(0.000000  0.000000  -0.000000)
(0.000000  0.000000  -0.000000)
(0.000000  0.000000  -0.000000)
(0.000000  0.000000  -0.000000)
(0.000000  0.000000  -0.000000)
(0.000000  0.000000  -0.000000)
(0.000000  0.000000  -0.000000)
(0.000000  0.000000  -0.000000)
(0.000000  0.000000  -0.000000)
(0.000000  0.000000  -0.000000)
(0.000000  0.000000  -0.000000)
(0.000000  0.000000  -0.000000)
(0.000000  0.000000  -0.000000)
(0.000000  0.000000  -0.000000)
(0.000000  0.000000  -0.000000)
(0.000000  0.000000  -0.000000)
(0.000000  0.000000  -0.000000)
(0.000000  0.000000  -0.000000)
(0.000000  0.000000  -0.000000)
(0.000000  0.000000  -0.000000)
(0.000000  0.000000  -0.000000)
(0.000000  0.000000  -0.000000)
(0.000000  0.000000  -0.000000)
(0.000000  0.000000  -0.000000)
(0.000000  0.000000  -0.000000)
(0.000000  0.000000  -0.000000)
(0.000000  0.000000  -0.000000)
(0.000000  0.000000  -0.000000)
(0.000000  0.000000  -0.000000)
(0.000000  0.000000  -0.000000)
(0.000000  0.000000  -0.000000)
(0.000000  0.000000  -0.000000)
(0.000000  0.000000  -0.000000)
(0.000000  0.000000  -0.000000)
(0.000000  0.000000  -0.000000)
(0.000000  0.000000  -0.000000)
(0.000000  0.000000  -0.000000)
(0.000000  0.000000  -0.000000)
(0.000000  0.000000  -0.000000)
(0.000000  0.000000  -0.000000)
(0.000000  0.000000  -0.000000)
(0.000000  0.000000  -0.000000)
(0.000000  0.000000  -0.000000)
(0.000000  0.000000  -0.000000)
(0.000000  0.000000  -0.000000)
(0.000000  0.000000  -0.000000)
(0.000000  0.000000  -0.000000)
(0.000000  0.000000  -0.000000)
(0.000000  0.000000  -0.000000)
(0.000000  0.000000  -0.000000)
(0.000000  0.000000  -0.000000)
(0.000000  0.000000  -0.000000)
(0.000000  0.000000  -0.000000)
(0.000000  0.000000  -0.000000)
(0.000000  0.000000  -0.000000)
(0.000000  0.000000  -0.000000)
(0.000000  0.000000  -0.000000)
(0.000000  0.000000  -0.000000)
(0.000000  0.000000  -0.000000)
(0.000000  0.000000  -0.000000)
(0.000000  0.000000  -0.000000)
(0.000000  0.000000  -0.000000)
(0.000000  0.000000  -0.000000)
(0.000000  0.000000  -0.000000)
(0.000000  0.000000  -0.000000)
(0.000000  0.000000  -0.000000)
(0.000000  0.000000  -0.000000)
(0.000000  0.000000  -0.000000)
(0.000000  0.000000  -0.000000)
(0.000000  0.000000  -0.000000)
(0.000000  0.000000  -0.000000)
(0.000000  0.000000  -0.000000)
(0.000000  0.000000  -0.000000)
(0.000000  0.000000  -0.000000)
(0.000000  0.000000  -0.000000)
(0.000000  0.000000  -0.000000)
(0.000000  0.000000  -0.000000)
(0.000000  0.000000  -0.000000)
(0.000000  0.000000  -0.000000)
(0.000000  0.000000  -0.000000)
(0.000000  0.000000  -0.000000)
(0.000000  0.000000  -0.000000)
(0.000000  0.000000  -0.000000)
(0.000000  0.000000  -0.000000)
(0.000000  0.000000  -0.000000)
(0.000000  0.000000  -0.000000)
(0.000000  0.000000  -0.000000)
(0.000000  0.000000  -0.000000)
(0.000000  0.000000  -0.000000)
(0.000000  0.000000  -0.000000)
(0.000000  0.000000  -0.000000)
(0.000000  0.000000  -0.000000)
(0.000000  0.000000  -0.000000)
(0.000000  0.000000  -0.000000)
(0.000000  0.000000  -0.000000)
(0.000000  0.000000  -0.000000)
(0.000000  0.000000  -0.000000)
(0.000000  0.000000  -0.000000)
(0.000000  0.000000  -0.000000)
(0.000000  0.000000  -0.000000)
(0.000000  0.000000  -0.000000)
(0.000000  0.000000  -0.000000)
(0.000000  0.000000  -0.000000)
(0.000000  0.000000  -0.000000)
(0.000000  0.000000  -0.000000)
(0.000000  0.000000  -0.000000)
(0.000000  0.000000  -0.000000)
(0.000000  0.000000  -0.000000)
(0.000000  0.000000  -0.000000)
(0.000000  0.000000  -0.000000)
(0.000000  0.000000  -0.000000)
(0.000000  0.000000  -0.000000)
(0.000000  0.000000  -0.000000)
(0.000000  0.000000  -0.000000)
(0.000000  0.000000  -0.000000)
(0.000000  0.000000  -0.000000)
(0.000000  0.000000  -0.000000)
(0.000000  0.000000  -0.000000)
(0.000000  0.000000  -0.000000)
(0.000000  0.000000  -0.000000)
(0.000000  0.000000  -0.000000)
(0.000000  0.000000  -0.000000)
(0.000000  0.000000  -0.000000)
(0.000000  0.000000  -0.000000)
(0.000001  0.000000  -0.000000)
(0.000001  0.000000  -0.000000)
(0.000001  0.000000  -0.000000)
(0.000001  0.000000  -0.000000)
(0.000001  0.000000  -0.000000)
(0.000001  0.000000  -0.000000)
(0.000001  0.000000  -0.000000)
(0.000001  0.000000  -0.000000)
(0.000001  0.000000  -0.000000)
(0.000001  0.000000  -0.000000)
(0.000001  0.000000  -0.000000)
(0.000001  0.000000  -0.000000)
(0.000001  0.000000  -0.000000)
(0.000001  0.000000  -0.000000)
(0.000002  0.000000  -0.000000)
(0.000002  0.000000  -0.000000)
(0.000002  0.000000  -0.000000)
(0.000002  0.000000  -0.000000)
(0.000002  0.000000  -0.000000)
(0.000002  0.000000  -0.000000)
(0.000003  0.000000  -0.000000)
(0.000003  0.000000  -0.000000)
(0.000003  0.000000  -0.000000)
(0.000003  0.000000  -0.000000)
(0.000004  0.000000  -0.000000)
(0.000004  0.000000  -0.000000)
(0.000004  0.000000  -0.000000)
(0.000005  0.000000  -0.000000)
(0.000005  0.000000  -0.000000)
(0.000005  0.000000  -0.000000)
(0.000006  0.000000  -0.000000)
(0.000006  0.000000  -0.000000)
(0.000007  0.000000  -0.000000)
(0.000008  0.000000  -0.000000)
(0.000008  0.000000  -0.000000)
(0.000009  0.000000  -0.000000)
(0.000010  0.000000  -0.000000)
(0.000011  0.000000  -0.000000)
(0.000011  0.000000  -0.000000)
(0.000012  0.000000  -0.000000)
(0.000013  0.000000  -0.000000)
(0.000015  0.000000  -0.000000)
(0.000016  0.000000  -0.000000)
(0.000017  0.000000  -0.000000)
(0.000019  0.000000  -0.000000)
(0.000020  0.000000  -0.000000)
(0.000022  0.000000  -0.000000)
(0.000024  0.000000  -0.000000)
(0.000026  0.000000  -0.000000)
(0.000028  0.000000  -0.000000)
(0.000031  0.000000  -0.000000)
(0.000033  0.000000  -0.000000)
(0.000036  0.000000  -0.000000)
(0.000039  0.000000  -0.000000)
(0.000042  0.000000  -0.000000)
(0.000046  0.000000  -0.000000)
(0.000050  0.000000  -0.000000)
(0.000054  0.000000  -0.000000)
(0.000059  0.000000  -0.000000)
(0.000064  0.000000  -0.000000)
(0.000069  0.000000  -0.000000)
(0.000075  0.000000  -0.000000)
(0.000081  0.000000  -0.000000)
(0.000088  0.000000  -0.000000)
(0.000096  0.000000  -0.000000)
(0.000104  0.000000  -0.000001)
(0.000113  0.000000  -0.000001)
(0.000122  0.000000  -0.000001)
(0.000133  0.000000  -0.000001)
(0.000144  0.000000  -0.000001)
(0.000156  0.000000  -0.000001)
(0.000169  0.000000  -0.000001)
(0.000184  0.000000  -0.000001)
(0.000199  0.000000  -0.000001)
(0.000216  0.000000  -0.000001)
(0.000234  0.000000  -0.000001)
(0.000254  0.000000  -0.000001)
(0.000275  0.000000  -0.000001)
(0.000299  0.000000  -0.000002)
(0.000324  0.000000  -0.000002)
(0.000351  0.000000  -0.000002)
(0.000381  0.000000  -0.000002)
(0.000413  0.000000  -0.000002)
(0.000447  0.000000  -0.000002)
(0.000485  0.000000  -0.000002)
(0.000525  0.000000  -0.000003)
(0.000569  0.000000  -0.000003)
(0.000617  0.000000  -0.000003)
(0.000668  0.000000  -0.000003)
(0.000724  0.000000  -0.000004)
(0.000784  0.000000  -0.000004)
(0.000849  0.000000  -0.000004)
(0.000919  0.000000  -0.000005)
(0.000995  0.000000  -0.000005)
(0.001077  0.000000  -0.000005)
(0.001166  0.000000  -0.000006)
(0.001262  0.000000  -0.000006)
(0.001365  0.000000  -0.000007)
(0.001476  0.000000  -0.000007)
(0.001596  0.000000  -0.000008)
(0.001725  0.000000  -0.000008)
(0.001864  0.000000  -0.000009)
(0.002013  0.000000  -0.000010)
(0.002174  0.000000  -0.000010)
(0.002347  0.000000  -0.000011)
(0.002532  0.000000  -0.000012)
(0.002732  0.000000  -0.000013)
(0.002945  0.000000  -0.000014)
(0.003174  0.000000  -0.000015)
(0.003419  0.000000  -0.000016)
(0.003681  0.000000  -0.000017)
(0.003961  0.000000  -0.000018)
(0.004261  0.000000  -0.000019)
(0.004579  0.000000  -0.000021)
(0.004919  0.000000  -0.000022)
(0.005281  0.000000  -0.000023)
(0.005665  0.000000  -0.000025)
(0.006072  0.000000  -0.000026)
(0.006504  0.000000  -0.000028)
(0.006961  0.000000  -0.000029)
(0.007443  0.000000  -0.000031)
(0.007952  0.000000  -0.000033)
(0.008488  0.000000  -0.000034)
(0.009051  0.000000  -0.000036)
(0.009642  0.000000  -0.000038)
(0.010260  0.000000  -0.000040)
(0.010906  0.000000  -0.000041)
(0.011580  0.000000  -0.000043)
(0.012280  0.000000  -0.000045)
(0.013006  0.000000  -0.000046)
(0.013757  0.000000  -0.000048)
(0.014532  0.000000  -0.000049)
(0.015330  0.000000  -0.000051)
(0.016149  0.000000  -0.000052)
(0.016986  0.000000  -0.000053)
(0.017839  0.000000  -0.000054)
(0.018706  0.000000  -0.000055)
(0.019583  0.000000  -0.000055)
(0.020468  0.000000  -0.000055)
(0.021356  0.000000  -0.000056)
(0.022244  0.000000  -0.000055)
(0.023128  0.000000  -0.000055)
(0.024004  0.000000  -0.000054)
(0.024866  0.000000  -0.000053)
(0.025711  0.000000  -0.000052)
(0.026534  0.000000  -0.000051)
(0.027329  0.000000  -0.000049)
(0.028093  0.000000  -0.000047)
(0.028820  0.000000  -0.000044)
(0.029505  0.000000  -0.000041)
(0.030145  0.000000  -0.000038)
(0.030734  0.000000  -0.000035)
(0.031270  0.000000  -0.000032)
(0.031747  0.000000  -0.000028)
(0.032162  0.000000  -0.000024)
(0.032514  0.000000  -0.000020)
(0.032798  0.000000  -0.000016)
(0.033013  0.000000  -0.000011)
(0.033157  0.000000  -0.000007)
(0.033229  0.000000  -0.000002)
(0.033229  0.000000  0.000002)
(0.033157  0.000000  0.000007)
(0.033013  0.000000  0.000011)
(0.032798  0.000000  0.000016)
(0.032514  0.000000  0.000020)
(0.032162  0.000000  0.000024)
(0.031747  0.000000  0.000028)
(0.031270  0.000000  0.000032)
(0.030734  0.000000  0.000035)
(0.030145  0.000000  0.000038)
(0.029505  0.000000  0.000041)
(0.028820  0.000000  0.000044)
(0.028093  0.000000  0.000047)
(0.027329  0.000000  0.000049)
(0.026534  0.000000  0.000051)
(0.025711  0.000000  0.000052)
(0.024866  0.000000  0.000053)
(0.024004  0.000000  0.000054)
(0.023128  0.000000  0.000055)
(0.022244  0.000000  0.000055)
(0.021356  0.000000  0.000056)
(0.020468  0.000000  0.000055)
(0.019583  0.000000  0.000055)
(0.018706  0.000000  0.000055)
(0.017839  0.000000  0.000054)
(0.016986  0.000000  0.000053)
(0.016149  0.000000  0.000052)
(0.015330  0.000000  0.000051)
(0.014532  0.000000  0.000049)
(0.013757  0.000000  0.000048)
(0.013006  0.000000  0.000046)
(0.012280  0.000000  0.000045)
(0.011580  0.000000  0.000043)
(0.010906  0.000000  0.000041)
(0.010260  0.000000  0.000040)
(0.009642  0.000000  0.000038)
(0.009051  0.000000  0.000036)
(0.008488  0.000000  0.000034)
(0.007952  0.000000  0.000033)
(0.007443  0.000000  0.000031)
(0.006961  0.000000  0.000029)
(0.006504  0.000000  0.000028)
(0.006072  0.000000  0.000026)
(0.005665  0.000000  0.000025)
(0.005281  0.000000  0.000023)
(0.004919  0.000000  0.000022)
(0.004579  0.000000  0.000021)
(0.004261  0.000000  0.000019)
(0.003961  0.000000  0.000018)
(0.003681  0.000000  0.000017)
(0.003419  0.000000  0.000016)
(0.003174  0.000000  0.000015)
(0.002945  0.000000  0.000014)
(0.002732  0.000000  0.000013)
(0.002532  0.000000  0.000012)
(0.002347  0.000000  0.000011)
(0.002174  0.000000  0.000010)
(0.002013  0.000000  0.000010)
(0.001864  0.000000  0.000009)
(0.001725  0.000000  0.000008)
(0.001596  0.000000  0.000008)
(0.001476  0.000000  0.000007)
(0.001365  0.000000  0.000007)
(0.001262  0.000000  0.000006)
(0.001166  0.000000  0.000006)
(0.001077  0.000000  0.000005)
(0.000995  0.000000  0.000005)
(0.000919  0.000000  0.000005)
(0.000849  0.000000  0.000004)
(0.000784  0.000000  0.000004)
(0.000724  0.000000  0.000004)
(0.000668  0.000000  0.000003)
(0.000617  0.000000  0.000003)
(0.000569  0.000000  0.000003)
(0.000525  0.000000  0.000003)
(0.000485  0.000000  0.000002)
(0.000447  0.000000  0.000002)
(0.000413  0.000000  0.000002)
(0.000381  0.000000  0.000002)
(0.000351  0.000000  0.000002)
(0.000324  0.000000  0.000002)
(0.000299  0.000000  0.000002)
(0.000275  0.000000  0.000001)
(0.000254  0.000000  0.000001)
(0.000234  0.000000  0.000001)
(0.000216  0.000000  0.000001)
(0.000199  0.000000  0.000001)
(0.000184  0.000000  0.000001)
(0.000169  0.000000  0.000001)
(0.000156  0.000000  0.000001)
(0.000144  0.000000  0.000001)
(0.000133  0.000000  0.000001)
(0.000122  0.000000  0.000001)
(0.000113  0.000000  0.000001)
(0.000104  0.000000  0.000001)
(0.000096  0.000000  0.000000)
(0.000088  0.000000  0.000000)
(0.000081  0.000000  0.000000)
(0.000075  0.000000  0.000000)
(0.000069  0.000000  0.000000)
(0.000064  0.000000  0.000000)
(0.000059  0.000000  0.000000)
(0.000054  0.000000  0.000000)
(0.000050  0.000000  0.000000)
(0.000046  0.000000  0.000000)
(0.000042  0.000000  0.000000)
(0.000039  0.000000  0.000000)
(0.000036  0.000000  0.000000)
(0.000033  0.000000  0.000000)
(0.000031  0.000000  0.000000)
(0.000028  0.000000  0.000000)
(0.000026  0.000000  0.000000)
(0.000024  0.000000  0.000000)
(0.000022  0.000000  0.000000)
(0.000020  0.000000  0.000000)
(0.000019  0.000000  0.000000)
(0.000017  0.000000  0.000000)
(0.000016  0.000000  0.000000)
(0.000015  0.000000  0.000000)
(0.000013  0.000000  0.000000)
(0.000012  0.000000  0.000000)
(0.000011  0.000000  0.000000)
(0.000011  0.000000  0.000000)
(0.000010  0.000000  0.000000)
(0.000009  0.000000  0.000000)
(0.000000  0.000000  0.000000)
(0.000000  0.000000  -0.000000)
(0.000000  0.000000  0.000000)
(0.000000  0.000000  -0.000000)
(0.000000  0.000000  0.000000)
(0.000000  0.000000  -0.000000)
(0.000000  0.000000  0.000000)
(0.000000  0.000000  -0.000000)
(0.000000  0.000000  0.000000)
(0.000000  0.000000  -0.000000)
(0.000000  0.000000  0.000000)
(0.000000  0.000000  -0.000000)
(0.000000  0.000000  0.000000)
(0.000000  0.000000  -0.000000)
(0.000000  0.000000  0.000000)
(0.000000  0.000000  -0.000000)
(0.000000  0.000000  0.000000)
(0.000000  0.000000  0.000000)
(0.000000  0.000000  0.000000)
(0.000000  0.000000  -0.000000)
(0.000000  0.000000  0.000000)
(0.000000  0.000000  -0.000000)
(0.000000  0.000000  -0.000000)
(0.000000  0.000000  -0.000000)
(0.000000  0.000000  0.000000)
(0.000000  0.000000  -0.000000)
(0.000000  0.000000  0.000000)
(0.000000  0.000000  -0.000000)
(0.000000  0.000000  0.000000)
(0.000000  0.000000  0.000000)
(0.000000  0.000000  -0.000000)
(0.000000  0.000000  0.000000)
(0.000000  0.000000  -0.000000)
(0.000000  0.000000  -0.000000)
(0.000000  0.000000  -0.000000)
(0.000000  0.000000  -0.000000)
(0.000000  0.000000  -0.000000)
(0.000000  0.000000  -0.000000)
(0.000000  0.000000  -0.000000)
(0.000000  0.000000  0.000000)
(0.000000  0.000000  0.000000)
(0.000000  0.000000  -0.000000)
(0.000000  0.000000  -0.000000)
(0.000000  0.000000  0.000000)
(0.000000  0.000000  0.000000)
(0.000000  0.000000  -0.000000)
(0.000000  0.000000  -0.000000)
(0.000000  0.000000  -0.000000)
(0.000000  0.000000  -0.000000)
(0.000000  0.000000  0.000000)
(0.000000  0.000000  -0.000000)
(0.000000  0.000000  0.000000)
(0.000000  0.000000  0.000000)
(-0.000000  0.000000  -0.000000)
(0.000000  0.000000  0.000000)
(-0.000000  0.000000  0.000000)
(-0.000000  0.000000  -0.000000)
(-0.000000  0.000000  -0.000000)
(-0.000000  0.000000  0.000000)
(-0.000000  0.000000  -0.000000)
(-0.000000  0.000000  -0.000000)
(-0.000000  0.000000  -0.000000)
(-0.000000  0.000000  -0.000000)
(-0.000000  0.000000  -0.000000)
(-0.000000  0.000000  0.000000)
(-0.000000  0.000000  0.000000)
(-0.000000  0.000000  0.000000)
(-0.000000  0.000000  0.000000)
(-0.000000  0.000000  0.000000)
(-0.000000  0.000000  -0.000000)
(-0.000000  0.000000  0.000000)
(-0.000000  0.000000  -0.000000)
(-0.000000  0.000000  0.000000)
(-0.000000  0.000000  0.000000)
(-0.000000  0.000000  0.000000)
(-0.000000  0.000000  -0.000000)
(-0.000000  0.000000  0.000000)
(0.000000  0.000000  0.000000)
(0.000000  0.000000  0.000000)
(0.000000  0.000000  -0.000000)
(0.000000  0.000000  0.000000)
(0.000000  0.000000  0.000000)
(0.000000  0.000000  0.000000)
(0.000000  0.000000  -0.000000)
(0.000000  0.000000  -0.000000)
(0.000000  0.000000  0.000000)
(0.000000  0.000000  -0.000000)
(0.000000  0.000000  0.000000)
(0.000000  0.000000  -0.000000)
(0.000000  0.000000  0.000000)
(0.000000  0.000000  -0.000000)
(0.000000  0.000000  -0.000000)
(0.000000  0.000000  -0.000000)
(0.000000  0.000000  0.000000)
(0.000000  0.000000  -0.000000)
(0.000000  0.000000  -0.000000)
(0.000000  0.000000  -0.000000)
(0.000000  0.000000  -0.000000)
(0.000000  0.000000  -0.000000)
(0.000000  0.000000  -0.000000)
(0.000000  0.000000  -0.000000)
(0.000000  0.000000  -0.000000)
(0.000000  0.000000  -0.000000)
(0.000000  0.000000  -0.000000)
(0.000000  0.000000  -0.000000)
(0.000000  0.000000  0.000000)
(0.000000  0.000000  -0.000000)
(0.000000  0.000000  0.000000)
(0.000000  0.000000  -0.000000)
(0.000000  0.000000  -0.000000)
(0.000000  0.000000  -0.000000)
(0.000000  0.000000  -0.000000)
(0.000000  0.000000  -0.000000)
(0.000000  0.000000  -0.000000)
(0.000000  0.000000  -0.000000)
(0.000000  0.000000  -0.000000)
(0.000000  0.000000  -0.000000)
(0.000000  0.000000  -0.000000)
(0.000000  0.000000  0.000000)
(0.000000  0.000000  -0.000000)
(0.000000  0.000000  -0.000000)
(0.000000  0.000000  -0.000000)
(0.000000  0.000000  -0.000000)
(0.000000  0.000000  -0.000000)
(0.000000  0.000000  0.000000)
(0.000000  0.000000  -0.000000)
(0.000000  0.000000  -0.000000)
(0.000000  0.000000  -0.000000)
(0.000000  0.000000  -0.000000)
(0.000000  0.000000  -0.000000)
(0.000000  0.000000  0.000000)
(0.000000  0.000000  -0.000000)
(0.000000  0.000000  -0.000000)
(0.000000  0.000000  0.000000)
(0.000000  0.000000  -0.000000)
(0.000000  0.000000  0.000000)
(0.000000  0.000000  -0.000000)
(0.000000  0.000000  -0.000000)
(0.000000  0.000000  0.000000)
(0.000000  0.000000  -0.000000)
(0.000000  0.000000  -0.000000)
(0.000000  0.000000  0.000000)
(0.000000  0.000000  -0.000000)
(0.000000  0.000000  0.000000)
(0.000000  0.000000  -0.000000)
(-0.000000  0.000000  0.000000)
(-0.000000  0.000000  -0.000000)
(-0.000000  0.000000  -0.000000)
(-0.000000  0.000000  -0.000000)
(-0.000000  0.000000  0.000000)
(-0.000000  0.000000  -0.000000)
(-0.000000  0.000000  -0.000000)
(-0.000000  0.000000  0.000000)
(-0.000000  0.000000  -0.000000)
(-0.000000  0.000000  0.000000)
(-0.000000  0.000000  0.000000)
(-0.000000  0.000000  0.000000)
(-0.000000  0.000000  -0.000000)
(-0.000000  0.000000  -0.000000)
(-0.000000  0.000000  -0.000000)
(-0.000000  0.000000  0.000000)
(-0.000000  0.000000  -0.000000)
(-0.000000  0.000000  -0.000000)
(-0.000000  0.000000  -0.000000)
(-0.000000  0.000000  -0.000000)
(-0.000000  0.000000  -0.000000)
(-0.000000  0.000000  -0.000000)
(-0.000000  0.000000  0.000000)
(-0.000000  0.000000  -0.000000)
(-0.000000  0.000000  -0.000000)
(-0.000000  0.000000  -0.000000)
(-0.000000  0.000000  -0.000000)
(-0.000000  0.000000  -0.000000)
(-0.000000  0.000000  -0.000000)
(-0.000000  0.000000  0.000000)
(0.000000  0.000000  -0.000000)
(0.000000  0.000000  -0.000000)
(0.000000  0.000000  0.000000)
(0.000000  0.000000  -0.000000)
(0.000000  0.000000  -0.000000)
(0.000000  0.000000  -0.000000)
(0.000000  0.000000  -0.000000)
(0.000000  0.000000  -0.000000)
(0.000000  0.000000  -0.000000)
(0.000000  0.000000  -0.000000)
(0.000000  0.000000  -0.000000)
(0.000000  0.000000  -0.000000)
(0.000000  0.000000  -0.000000)
(0.000000  0.000000  -0.000000)
(0.000000  0.000000  -0.000000)
(0.000000  0.000000  -0.000000)
(0.000000  0.000000  -0.000000)
(0.000000  0.000000  -0.000000)
(0.000000  0.000000  -0.000000)
(0.000000  0.000000  -0.000000)
(0.000000  0.000000  -0.000000)
(0.000000  0.000000  -0.000000)
(0.000000  0.000000  -0.000000)
(0.000000  0.000000  -0.000000)
(0.000000  0.000000  -0.000000)
(0.000000  0.000000  -0.000000)
(0.000000  0.000000  -0.000000)
(0.000000  0.000000  -0.000000)
(0.000000  0.000000  -0.000000)
(0.000000  0.000000  -0.000000)
(0.000000  0.000000  -0.000000)
(0.000000  0.000000  -0.000000)
(0.000000  0.000000  -0.000000)
(0.000000  0.000000  -0.000000)
(0.000000  0.000000  -0.000000)
(0.000000  0.000000  -0.000000)
(0.000000  0.000000  -0.000000)
(0.000000  0.000000  -0.000000)
(0.000000  0.000000  -0.000000)
(0.000000  0.000000  -0.000000)
(0.000000  0.000000  -0.000000)
(0.000000  0.000000  -0.000000)
(0.000000  0.000000  -0.000000)
(0.000000  0.000000  -0.000000)
(0.000000  0.000000  -0.000000)
(0.000000  0.000000  -0.000000)
(0.000000  0.000000  -0.000000)
(0.000000  0.000000  -0.000000)
(0.000000  0.000000  -0.000000)
(0.000000  0.000000  -0.000000)
(0.000000  0.000000  -0.000000)
(0.000000  0.000000  -0.000000)
(0.000000  0.000000  -0.000000)
(0.000000  0.000000  -0.000000)
(0.000000  0.000000  -0.000000)
(0.000000  0.000000  -0.000000)
(0.000000  0.000000  -0.000000)
(0.000000  0.000000  -0.000000)
(0.000000  0.000000  -0.000000)
(0.000000  0.000000  -0.000000)
(0.000000  0.000000  -0.000000)
(0.000000  0.000000  -0.000000)
(0.000000  0.000000  -0.000000)
(0.000000  0.000000  -0.000000)
(0.000000  0.000000  -0.000000)
(0.000000  0.000000  -0.000000)
(0.000000  0.000000  -0.000000)
(0.000000  0.000000  -0.000000)
(0.000000  0.000000  -0.000000)
(0.000000  0.000000  -0.000000)
(0.000000  0.000000  -0.000000)
(0.000000  0.000000  -0.000000)
(0.000000  0.000000  -0.000000)
(0.000000  0.000000  -0.000000)
(0.000000  0.000000  -0.000000)
(0.000000  0.000000  -0.000000)
(0.000000  0.000000  -0.000000)
(0.000000  0.000000  -0.000000)
(0.000000  0.000000  -0.000000)
(0.000000  0.000000  -0.000000)
(0.000000  0.000000  -0.000000)
(0.000000  0.000000  -0.000000)
(0.000000  0.000000  -0.000000)
(0.000000  0.000000  -0.000000)
(0.000000  0.000000  -0.000000)
(0.000000  0.000000  -0.000000)
(0.000000  0.000000  -0.000000)
(0.000000  0.000000  -0.000000)
(0.000000  0.000000  -0.000000)
(0.000000  0.000000  -0.000000)
(0.000000  0.000000  -0.000000)
(0.000000  0.000000  -0.000000)
(0.000000  0.000000  -0.000000)
(0.000000  0.000000  -0.000000)
(0.000000  0.000000  -0.000000)
(0.000000  0.000000  -0.000000)
(0.000000  0.000000  -0.000000)
(0.000000  0.000000  -0.000000)
(0.000000  0.000000  -0.000000)
(0.000000  0.000000  -0.000000)
(0.000000  0.000000  -0.000000)
(0.000000  0.000000  -0.000000)
(0.000000  0.000000  -0.000000)
(0.000000  0.000000  -0.000000)
(0.000000  0.000000  -0.000000)
(0.000000  0.000000  -0.000000)
(0.000000  0.000000  -0.000000)
(0.000000  0.000000  -0.000000)
(0.000000  0.000000  -0.000000)
(0.000000  0.000000  -0.000000)
(0.000000  0.000000  -0.000000)
(0.000000  0.000000  -0.000000)
(0.000000  0.000000  -0.000000)
(0.000000  0.000000  -0.000000)
(0.000000  0.000000  -0.000000)
(0.000000  0.000000  -0.000000)
(0.000000  0.000000  -0.000000)
(0.000000  0.000000  -0.000000)
(0.000000  0.000000  -0.000000)
(0.000000  0.000000  -0.000000)
(0.000000  0.000000  -0.000000)
(0.000000  0.000000  -0.000000)
(0.000000  0.000000  -0.000000)
(0.000000  0.000000  -0.000000)
(0.000000  0.000000  -0.000000)
(0.000000  0.000000  -0.000000)
(0.000000  0.000000  -0.000000)
(0.000000  0.000000  -0.000000)
(0.000000  0.000000  -0.000000)
(0.000000  0.000000  -0.000000)
(0.000000  0.000000  -0.000000)
(0.000000  0.000000  -0.000000)
(0.000000  0.000000  -0.000000)
(0.000000  0.000000  -0.000000)
(0.000000  0.000000  -0.000000)
(0.000000  0.000000  -0.000000)
(0.000000  0.000000  -0.000000)
(0.000000  0.000000  -0.000000)
(0.000000  0.000000  -0.000000)
(0.000000  0.000000  -0.000000)
(0.000000  0.000000  -0.000000)
(0.000000  0.000000  -0.000000)
(0.000000  0.000000  -0.000000)
(0.000000  0.000000  -0.000000)
(0.000000  0.000000  -0.000000)
(0.000000  0.000000  -0.000000)
(0.000000  0.000000  -0.000000)
(0.000000  0.000000  -0.000000)
(0.000000  0.000000  -0.000000)
(0.000000  0.000000  -0.000000)
(0.000000  0.000000  -0.000000)
(0.000000  0.000000  -0.000000)
(0.000000  0.000000  -0.000000)
(0.000000  0.000000  -0.000000)
(0.000000  0.000000  -0.000000)
(0.000000  0.000000  -0.000000)
(0.000000  0.000000  -0.000000)
(0.000000  0.000000  -0.000000)
(0.000000  0.000000  -0.000000)
(0.000000  0.000000  -0.000000)
(0.000000  0.000000  -0.000000)
(0.000000  0.000000  -0.000000)
(0.000000  0.000000  -0.000000)
(0.000000  0.000000  -0.000000)
(0.000000  0.000000  -0.000000)
(0.000000  0.000000  -0.000000)
(0.000000  0.000000  -0.000000)
(0.000000  0.000000  -0.000000)
(0.000000  0.000000  -0.000000)
(0.000000  0.000000  -0.000000)
(0.000000  0.000000  -0.000000)
(0.000000  0.000000  -0.000000)
(0.000000  0.000000  -0.000000)
(0.000000  0.000000  -0.000000)
(0.000000  0.000000  -0.000000)
(0.000000  0.000000  -0.000000)
(0.000000  0.000000  -0.000000)
(0.000000  0.000000  -0.000000)
(0.000000  0.000000  -0.000000)
(0.000000  0.000000  -0.000000)
(0.000000  0.000000  -0.000000)
(0.000000  0.000000  -0.000000)
(0.000000  0.000000  -0.000000)
(0.000000  0.000000  -0.000000)
(0.000000  0.000000  -0.000000)
(0.000000  0.000000  -0.000000)
(0.000000  0.000000  -0.000000)
(0.000000  0.000000  -0.000000)
(0.000000  0.000000  -0.000000)
(0.000000  0.000000  -0.000000)
(0.000000  0.000000  -0.000000)
(0.000000  0.000000  -0.000000)
(0.000000  0.000000  -0.000000)
(0.000000  0.000000  -0.000000)
(0.000000  0.000000  -0.000000)
(0.000000  0.000000  -0.000000)
(0.000000  0.000000  -0.000000)
(0.000000  0.000000  -0.000000)
(0.000000  0.000000  -0.000000)
(0.000000  0.000000  -0.000000)
(0.000000  0.000000  -0.000000)
(0.000000  0.000000  -0.000000)
(0.000000  0.000000  -0.000000)
(0.000000  0.000000  -0.000000)
(0.000000  0.000000  -0.000000)
(0.000000  0.000000  -0.000000)
(0.000000  0.000000  -0.000000)
(0.000000  0.000000  -0.000000)
(0.000000  0.000000  -0.000000)
(0.000000  0.000000  -0.000000)
(0.000000  0.000000  -0.000000)
(0.000000  0.000000  -0.000000)
(0.000000  0.000000  -0.000000)
(0.000000  0.000000  -0.000000)
(0.000000  0.000000  -0.000000)
(0.000000  0.000000  -0.000000)
(0.000000  0.000000  -0.000000)
(0.000000  0.000000  -0.000000)
(0.000000  0.000000  -0.000000)
(0.000000  0.000000  -0.000000)
(0.000000  0.000000  -0.000000)
(0.000000  0.000000  -0.000000)
(0.000000  0.000000  -0.000000)
(0.000000  0.000000  -0.000000)
(0.000000  0.000000  -0.000000)
(0.000000  0.000000  -0.000000)
(0.000000  0.000000  -0.000000)
(0.000000  0.000000  -0.000000)
(0.000000  0.000000  -0.000000)
(0.000000  0.000000  -0.000000)
(0.000000  0.000000  -0.000000)
(0.000000  0.000000  -0.000000)
(0.000000  0.000000  -0.000000)
(0.000000  0.000000  -0.000000)
(0.000000  0.000000  -0.000000)
(0.000000  0.000000  -0.000000)
(0.000000  0.000000  -0.000000)
(0.000000  0.000000  -0.000000)
(0.000000  0.000000  -0.000000)
(0.000000  0.000000  -0.000000)
(0.000000  0.000000  -0.000000)
(0.000000  0.000000  -0.000000)
(0.000000  0.000000  -0.000000)
(0.000000  0.000000  -0.000000)
(0.000000  0.000000  -0.000000)
(0.000000  0.000000  -0.000000)
(0.000000  0.000000  -0.000000)
(0.000000  0.000000  -0.000000)
(0.000000  0.000000  -0.000000)
(0.000000  0.000000  -0.000000)
(0.000000  0.000000  -0.000000)
(0.000000  0.000000  -0.000000)
(0.000000  0.000000  -0.000000)
(0.000000  0.000000  -0.000000)
(0.000000  0.000000  -0.000000)
(0.000000  0.000000  -0.000000)
(0.000000  0.000000  -0.000000)
(0.000000  0.000000  -0.000000)
(0.000000  0.000000  -0.000000)
(0.000000  0.000000  -0.000000)
(0.000000  0.000000  -0.000000)
(0.000000  0.000000  -0.000000)
(0.000000  0.000000  -0.000000)
(0.000000  0.000000  -0.000000)
(0.000000  0.000000  -0.000000)
(0.000000  0.000000  -0.000000)
(0.000000  0.000000  -0.000000)
(0.000000  0.000000  -0.000000)
(0.000000  0.000000  -0.000000)
(0.000000  0.000000  -0.000000)
(0.000000  0.000000  -0.000000)
(0.000000  0.000000  -0.000000)
(0.000000  0.000000  -0.000000)
(0.000000  0.000000  -0.000000)
(0.000000  0.000000  -0.000000)
(0.000000  0.000000  -0.000000)
(0.000000  0.000000  -0.000000)
(0.000000  0.000000  -0.000000)
(0.000000  0.000000  -0.000000)
(0.000000  0.000000  -0.000000)
(0.000000  0.000000  -0.000000)
(0.000000  0.000000  -0.000000)
(0.000000  0.000000  -0.000000)
(0.000000  0.000000  -0.000000)
(0.000000  0.000000  -0.000000)
(0.000000  0.000000  -0.000000)
(0.000000  0.000000  -0.000000)
(0.000000  0.000000  -0.000000)
(0.000000  0.000000  -0.000000)
(0.000000  0.000000  -0.000000)
(0.000001  0.000000  -0.000000)
(0.000001  0.000000  -0.000000)
(0.000001  0.000000  -0.000000)
(0.000001  0.000000  -0.000000)
(0.000001  0.000000  -0.000000)
(0.000001  0.000000  -0.000000)
(0.000001  0.000000  -0.000000)
(0.000001  0.000000  -0.000000)
(0.000001  0.000000  -0.000000)
(0.000001  0.000000  -0.000000)
(0.000001  0.000000  -0.000000)
(0.000001  0.000000  -0.000000)
(0.000001  0.000000  -0.000000)
(0.000001  0.000000  -0.000000)
(0.000002  0.000000  -0.000000)
(0.000002  0.000000  -0.000000)
(0.000002  0.000000  -0.000000)
(0.000002  0.000000  -0.000000)
(0.000002  0.000000  -0.000000)
(0.000002  0.000000  -0.000000)
(0.000003  0.000000  -0.000000)
(0.000003  0.000000  -0.000000)
(0.000003  0.000000  -0.000000)
(0.000003  0.000000  -0.000000)
(0.000004  0.000000  -0.000000)
(0.000004  0.000000  -0.000000)
(0.000004  0.000000  -0.000000)
(0.000005  0.000000  -0.000000)
(0.000005  0.000000  -0.000000)
(0.000005  0.000000  -0.000000)
(0.000006  0.000000  -0.000000)
(0.000006  0.000000  -0.000000)
(0.000007  0.000000  -0.000000)
(0.000008  0.000000  -0.000000)
(0.000008  0.000000  -0.000000)
(0.000009  0.000000  -0.000000)
(0.000010  0.000000  -0.000000)
(0.000011  0.000000  -0.000000)
(0.000011  0.000000  -0.000000)
(0.000012  0.000000  -0.000000)
(0.000013  0.000000  -0.000000)
(0.000015  0.000000  -0.000000)
(0.000016  0.000000  -0.000000)
(0.000017  0.000000  -0.000000)
(0.000019  0.000000  -0.000000)
(0.000020  0.000000  -0.000000)
(0.000022  0.000000  -0.000000)
(0.000024  0.000000  -0.000000)
(0.000026  0.000000  -0.000000)
(0.000028  0.000000  -0.000000)
(0.000031  0.000000  -0.000000)
(0.000033  0.000000  -0.000001)
(0.000036  0.000000  -0.000001)
(0.000039  0.000000  -0.000001)
(0.000042  0.000000  -0.000001)
(0.000046  0.000000  -0.000001)
(0.000050  0.000000  -0.000001)
(0.000054  0.000000  -0.000001)
(0.000059  0.000000  -0.000001)
(0.000064  0.000000  -0.000001)
(0.000069  0.000000  -0.000001)
(0.000075  0.000000  -0.000001)
(0.000081  0.000000  -0.000001)
(0.000088  0.000000  -0.000001)
(0.000096  0.000000  -0.000001)
(0.000104  0.000000  -0.000002)
(0.000113  0.000000  -0.000002)
(0.000122  0.000000  -0.000002)
(0.000133  0.000000  -0.000002)
(0.000144  0.000000  -0.000002)
(0.000156  0.000000  -0.000002)
(0.000169  0.000000  -0.000003)
(0.000184  0.000000  -0.000003)
(0.000199  0.000000  -0.000003)
(0.000216  0.000000  -0.000003)
(0.000234  0.000000  -0.000004)
(0.000254  0.000000  -0.000004)
(0.000275  0.000000  -0.000004)
(0.000299  0.000000  -0.000005)
(0.000324  0.000000  -0.000005)
(0.000351  0.000000  -0.000005)
(0.000381  0.000000  -0.000006)
(0.000413  0.000000  -0.000006)
(0.000447  0.000000  -0.000007)
(0.000485  0.000000  -0.000007)
(0.000525  0.000000  -0.000008)
(0.000569  0.000000  -0.000009)
(0.000617  0.000000  -0.000009)
(0.000668  0.000000  -0.000010)
(0.000724  0.000000  -0.000011)
(0.000784  0.000000  -0.000012)
(0.000849  0.000000  -0.000013)
(0.000919  0.000000  -0.000014)
(0.000995  0.000000  -0.000015)
(0.001077  0.000000  -0.000016)
(0.001166  0.000000  -0.000017)
(0.001261  0.000000  -0.000019)
(0.001364  0.000000  -0.000020)
(0.001476  0.000000  -0.000022)
(0.001595  0.000000  -0.000023)
(0.001724  0.000000  -0.000025)
(0.001863  0.000000  -0.000027)
(0.002013  0.000000  -0.000029)
(0.002174  0.000000  -0.000031)
(0.002347  0.000000  -0.000034)
(0.002532  0.000000  -0.000036)
(0.002731  0.000000  -0.000039)
(0.002945  0.000000  -0.000041)
(0.003174  0.000000  -0.000044)
(0.003419  0.000000  -0.000048)
(0.003681  0.000000  -0.000051)
(0.003961  0.000000  -0.000054)
(0.004260  0.000000  -0.000058)
(0.004579  0.000000  -0.000062)
(0.004919  0.000000  -0.000066)
(0.005280  0.000000  -0.000070)
(0.005664  0.000000  -0.000074)
(0.006072  0.000000  -0.000079)
(0.006504  0.000000  -0.000083)
(0.006960  0.000000  -0.000088)
(0.007443  0.000000  -0.000093)
(0.007952  0.000000  -0.000098)
(0.008488  0.000000  -0.000103)
(0.009051  0.000000  -0.000108)
(0.009642  0.000000  -0.000113)
(0.010260  0.000000  -0.000119)
(0.010906  0.000000  -0.000124)
(0.011579  0.000000  -0.000129)
(0.012279  0.000000  -0.000134)
(0.013005  0.000000  -0.000139)
(0.013757  0.000000  -0.000143)
(0.014532  0.000000  -0.000148)
(0.015330  0.000000  -0.000152)
(0.016148  0.000000  -0.000155)
(0.016985  0.000000  -0.000159)
(0.017839  0.000000  -0.000161)
(0.018706  0.000000  -0.000164)
(0.019583  0.000000  -0.000165)
(0.020468  0.000000  -0.000166)
(0.021356  0.000000  -0.000167)
(0.022244  0.000000  -0.000166)
(0.023128  0.000000  -0.000165)
(0.024004  0.000000  -0.000163)
(0.024867  0.000000  -0.000160)
(0.025712  0.000000  -0.000156)
(0.026534  0.000000  -0.000152)
(0.027330  0.000000  -0.000146)
(0.028094  0.000000  -0.000140)
(0.028821  0.000000  -0.000133)
(0.029506  0.000000  -0.000124)
(0.030146  0.000000  -0.000115)
(0.030735  0.000000  -0.000106)
(0.031271  0.000000  -0.000095)
(0.031748  0.000000  -0.000084)
(0.032163  0.000000  -0.000072)
(0.032515  0.000000  -0.000060)
(0.032799  0.000000  -0.000047)
(0.033014  0.000000  -0.000034)
(0.033158  0.000000  -0.000020)
(0.033230  0.000000  -0.000007)
(0.033230  0.000000  0.000007)
(0.033158  0.000000  0.000020)
(0.033014  0.000000  0.000034)
(0.032799  0.000000  0.000047)
(0.032515  0.000000  0.000060)
(0.032163  0.000000  0.000072)
(0.031748  0.000000  0.000084)
(0.031271  0.000000  0.000095)
(0.030735  0.000000  0.000106)
(0.030146  0.000000  0.000115)
(0.029506  0.000000  0.000124)
(0.028821  0.000000  0.000133)
(0.028094  0.000000  0.000140)
(0.027330  0.000000  0.000146)
(0.026534  0.000000  0.000152)
(0.025712  0.000000  0.000156)
(0.024867  0.000000  0.000160)
(0.024004  0.000000  0.000163)
(0.023128  0.000000  0.000165)
(0.022244  0.000000  0.000166)
(0.021356  0.000000  0.000167)
(0.020468  0.000000  0.000166)
(0.019583  0.000000  0.000165)
(0.018706  0.000000  0.000164)
(0.017839  0.000000  0.000161)
(0.016985  0.000000  0.000159)
(0.016148  0.000000  0.000155)
(0.015330  0.000000  0.000152)
(0.014532  0.000000  0.000148)
(0.013757  0.000000  0.000143)
(0.013005  0.000000  0.000139)
(0.012279  0.000000  0.000134)
(0.011579  0.000000  0.000129)
(0.010906  0.000000  0.000124)
(0.010260  0.000000  0.000119)
(0.009642  0.000000  0.000113)
(0.009051  0.000000  0.000108)
(0.008488  0.000000  0.000103)
(0.007952  0.000000  0.000098)
(0.007443  0.000000  0.000093)
(0.006960  0.000000  0.000088)
(0.006503  0.000000  0.000083)
(0.006072  0.000000  0.000079)
(0.005664  0.000000  0.000074)
(0.005280  0.000000  0.000070)
(0.004919  0.000000  0.000066)
(0.004579  0.000000  0.000062)
(0.004260  0.000000  0.000058)
(0.003961  0.000000  0.000054)
(0.003681  0.000000  0.000051)
(0.003419  0.000000  0.000048)
(0.003174  0.000000  0.000044)
(0.002945  0.000000  0.000041)
(0.002731  0.000000  0.000039)
(0.002532  0.000000  0.000036)
(0.002347  0.000000  0.000034)
(0.002174  0.000000  0.000031)
(0.002013  0.000000  0.000029)
(0.001863  0.000000  0.000027)
(0.001724  0.000000  0.000025)
(0.001595  0.000000  0.000023)
(0.001476  0.000000  0.000022)
(0.001364  0.000000  0.000020)
(0.001261  0.000000  0.000019)
(0.001166  0.000000  0.000017)
(0.001077  0.000000  0.000016)
(0.000995  0.000000  0.000015)
(0.000919  0.000000  0.000014)
(0.000849  0.000000  0.000013)
(0.000784  0.000000  0.000012)
(0.000724  0.000000  0.000011)
(0.000668  0.000000  0.000010)
(0.000617  0.000000  0.000009)
(0.000569  0.000000  0.000009)
(0.000525  0.000000  0.000008)
(0.000485  0.000000  0.000007)
(0.000447  0.000000  0.000007)
(0.000413  0.000000  0.000006)
(0.000381  0.000000  0.000006)
(0.000351  0.000000  0.000005)
(0.000324  0.000000  0.000005)
(0.000299  0.000000  0.000005)
(0.000275  0.000000  0.000004)
(0.000254  0.000000  0.000004)
(0.000234  0.000000  0.000004)
(0.000216  0.000000  0.000003)
(0.000199  0.000000  0.000003)
(0.000184  0.000000  0.000003)
(0.000169  0.000000  0.000003)
(0.000156  0.000000  0.000002)
(0.000144  0.000000  0.000002)
(0.000133  0.000000  0.000002)
(0.000122  0.000000  0.000002)
(0.000113  0.000000  0.000002)
(0.000104  0.000000  0.000002)
(0.000096  0.000000  0.000001)
(0.000088  0.000000  0.000001)
(0.000081  0.000000  0.000001)
(0.000075  0.000000  0.000001)
(0.000069  0.000000  0.000001)
(0.000064  0.000000  0.000001)
(0.000059  0.000000  0.000001)
(0.000054  0.000000  0.000001)
(0.000050  0.000000  0.000001)
(0.000046  0.000000  0.000001)
(0.000042  0.000000  0.000001)
(0.000039  0.000000  0.000001)
(0.000036  0.000000  0.000001)
(0.000033  0.000000  0.000001)
(0.000031  0.000000  0.000000)
(0.000028  0.000000  0.000000)
(0.000026  0.000000  0.000000)
(0.000024  0.000000  0.000000)
(0.000022  0.000000  0.000000)
(0.000020  0.000000  0.000000)
(0.000019  0.000000  0.000000)
(0.000017  0.000000  0.000000)
(0.000016  0.000000  0.000000)
(0.000015  0.000000  0.000000)
(0.000013  0.000000  0.000000)
(0.000012  0.000000  0.000000)
(0.000011  0.000000  0.000000)
(0.000011  0.000000  0.000000)
(0.000010  0.000000  0.000000)
(0.000009  0.000000  0.000000)
(0.000000  0.000000  -0.000000)
(0.000000  0.000000  0.000000)
(-0.000000  0.000000  -0.000000)
(-0.000000  0.000000  0.000000)
(0.000000  0.000000  -0.000000)
(-0.000000  0.000000  0.000000)
(-0.000000  0.000000  -0.000000)
(0.000000  0.000000  0.000000)
(0.000000  0.000000  -0.000000)
(0.000000  0.000000  -0.000000)
(0.000000  0.000000  -0.000000)
(0.000000  0.000000  -0.000000)
(0.000000  0.000000  0.000000)
(0.000000  0.000000  -0.000000)
(0.000000  0.000000  -0.000000)
(0.000000  0.000000  0.000000)
(0.000000  0.000000  -0.000000)
(0.000000  0.000000  0.000000)
(0.000000  0.000000  0.000000)
(0.000000  0.000000  0.000000)
(0.000000  0.000000  -0.000000)
(0.000000  0.000000  0.000000)
(0.000000  0.000000  -0.000000)
(0.000000  0.000000  -0.000000)
(0.000000  0.000000  -0.000000)
(0.000000  0.000000  0.000000)
(0.000000  0.000000  0.000000)
(0.000000  0.000000  -0.000000)
(0.000000  0.000000  -0.000000)
(0.000000  0.000000  0.000000)
(0.000000  0.000000  -0.000000)
(0.000000  0.000000  -0.000000)
(0.000000  0.000000  0.000000)
(0.000000  0.000000  -0.000000)
(0.000000  0.000000  -0.000000)
(0.000000  0.000000  -0.000000)
(0.000000  0.000000  -0.000000)
(0.000000  0.000000  -0.000000)
(0.000000  0.000000  0.000000)
(0.000000  0.000000  0.000000)
(0.000000  0.000000  -0.000000)
(0.000000  0.000000  0.000000)
(0.000000  0.000000  -0.000000)
(0.000000  0.000000  0.000000)
(0.000000  0.000000  -0.000000)
(0.000000  0.000000  0.000000)
(0.000000  0.000000  0.000000)
(0.000000  0.000000  -0.000000)
(0.000000  0.000000  -0.000000)
(0.000000  0.000000  0.000000)
(0.000000  0.000000  -0.000000)
(0.000000  0.000000  -0.000000)
(0.000000  0.000000  0.000000)
(0.000000  0.000000  0.000000)
(0.000000  0.000000  -0.000000)
(0.000000  0.000000  0.000000)
(0.000000  0.000000  -0.000000)
(0.000000  0.000000  0.000000)
(0.000000  0.000000  -0.000000)
(0.000000  0.000000  0.000000)
(0.000000  0.000000  -0.000000)
(0.000000  0.000000  0.000000)
(0.000000  0.000000  -0.000000)
(0.000000  0.000000  0.000000)
(0.000000  0.000000  -0.000000)
(0.000000  0.000000  -0.000000)
(0.000000  0.000000  0.000000)
(0.000000  0.000000  0.000000)
(0.000000  0.000000  -0.000000)
(0.000000  0.000000  -0.000000)
(0.000000  0.000000  0.000000)
(0.000000  0.000000  -0.000000)
(0.000000  0.000000  -0.000000)
(0.000000  0.000000  -0.000000)
(0.000000  0.000000  0.000000)
(0.000000  0.000000  0.000000)
(0.000000  0.000000  -0.000000)
(0.000000  0.000000  0.000000)
(0.000000  0.000000  -0.000000)
(0.000000  0.000000  0.000000)
(0.000000  0.000000  -0.000000)
(0.000000  0.000000  0.000000)
(0.000000  0.000000  -0.000000)
(0.000000  0.000000  0.000000)
(0.000000  0.000000  -0.000000)
(0.000000  0.000000  -0.000000)
(0.000000  0.000000  0.000000)
(0.000000  0.000000  -0.000000)
(0.000000  0.000000  0.000000)
(0.000000  0.000000  0.000000)
(0.000000  0.000000  -0.000000)
(0.000000  0.000000  0.000000)
(0.000000  0.000000  -0.000000)
(0.000000  0.000000  -0.000000)
(0.000000  0.000000  -0.000000)
(0.000000  0.000000  -0.000000)
(0.000000  0.000000  -0.000000)
(0.000000  0.000000  -0.000000)
(0.000000  0.000000  -0.000000)
(0.000000  0.000000  -0.000000)
(0.000000  0.000000  0.000000)
(0.000000  0.000000  -0.000000)
(0.000000  0.000000  -0.000000)
(0.000000  0.000000  0.000000)
(0.000000  0.000000  -0.000000)
(-0.000000  0.000000  0.000000)
(-0.000000  0.000000  0.000000)
(-0.000000  0.000000  -0.000000)
(-0.000000  0.000000  0.000000)
(-0.000000  0.000000  -0.000000)
(-0.000000  0.000000  -0.000000)
(-0.000000  0.000000  0.000000)
(-0.000000  0.000000  -0.000000)
(-0.000000  0.000000  0.000000)
(-0.000000  0.000000  -0.000000)
(-0.000000  0.000000  0.000000)
(-0.000000  0.000000  -0.000000)
(-0.000000  0.000000  0.000000)
(-0.000000  0.000000  -0.000000)
(-0.000000  0.000000  0.000000)
(-0.000000  0.000000  0.000000)
(-0.000000  0.000000  0.000000)
(-0.000000  0.000000  -0.000000)
(-0.000000  0.000000  -0.000000)
(-0.000000  0.000000  -0.000000)
(-0.000000  0.000000  0.000000)
(-0.000000  0.000000  -0.000000)
(-0.000000  0.000000  0.000000)
(-0.000000  0.000000  -0.000000)
(-0.000000  0.000000  0.000000)
(-0.000000  0.000000  -0.000000)
(-0.000000  0.000000  0.000000)
(-0.000000  0.000000  0.000000)
(-0.000000  0.000000  -0.000000)
(-0.000000  0.000000  -0.000000)
(-0.000000  0.000000  -0.000000)
(-0.000000  0.000000  0.000000)
(-0.000000  0.000000  0.000000)
(-0.000000  0.000000  -0.000000)
(-0.000000  0.000000  -0.000000)
(-0.000000  0.000000  0.000000)
(-0.000000  0.000000  -0.000000)
(-0.000000  0.000000  0.000000)
(-0.000000  0.000000  -0.000000)
(-0.000000  0.000000  0.000000)
(-0.000000  0.000000  -0.000000)
(-0.000000  0.000000  0.000000)
(-0.000000  0.000000  -0.000000)
(-0.000000  0.000000  0.000000)
(-0.000000  0.000000  0.000000)
(-0.000000  0.000000  -0.000000)
(-0.000000  0.000000  -0.000000)
(-0.000000  0.000000  0.000000)
(-0.000000  0.000000  -0.000000)
(-0.000000  0.000000  0.000000)
(-0.000000  0.000000  0.000000)
(-0.000000  0.000000  0.000000)
(-0.000000  0.000000  0.000000)
(-0.000000  0.000000  -0.000000)
(-0.000000  0.000000  -0.000000)
(-0.000000  0.000000  0.000000)
(-0.000000  0.000000  -0.000000)
(-0.000000  0.000000  0.000000)
(-0.000000  0.000000  -0.000000)
(-0.000000  0.000000  -0.000000)
(-0.000000  0.000000  -0.000000)
(-0.000000  0.000000  0.000000)
(-0.000000  0.000000  -0.000000)
(-0.000000  0.000000  0.000000)
(-0.000000  0.000000  -0.000000)
(-0.000000  0.000000  -0.000000)
(-0.000000  0.000000  0.000000)
(-0.000000  0.000000  -0.000000)
(-0.000000  0.000000  -0.000000)
(-0.000000  0.000000  -0.000000)
(-0.000000  0.000000  -0.000000)
(-0.000000  0.000000  -0.000000)
(-0.000000  0.000000  0.000000)
(-0.000000  0.000000  -0.000000)
(-0.000000  0.000000  -0.000000)
(-0.000000  0.000000  -0.000000)
(-0.000000  0.000000  -0.000000)
(-0.000000  0.000000  -0.000000)
(-0.000000  0.000000  -0.000000)
(-0.000000  0.000000  -0.000000)
(-0.000000  0.000000  -0.000000)
(-0.000000  0.000000  -0.000000)
(-0.000000  0.000000  -0.000000)
(-0.000000  0.000000  -0.000000)
(-0.000000  0.000000  -0.000000)
(-0.000000  0.000000  -0.000000)
(-0.000000  0.000000  -0.000000)
(-0.000000  0.000000  -0.000000)
(-0.000000  0.000000  -0.000000)
(-0.000000  0.000000  -0.000000)
(-0.000000  0.000000  -0.000000)
(-0.000000  0.000000  -0.000000)
(-0.000000  0.000000  -0.000000)
(0.000000  0.000000  -0.000000)
(0.000000  0.000000  -0.000000)
(0.000000  0.000000  -0.000000)
(0.000000  0.000000  -0.000000)
(0.000000  0.000000  -0.000000)
(0.000000  0.000000  -0.000000)
(0.000000  0.000000  -0.000000)
(0.000000  0.000000  -0.000000)
(0.000000  0.000000  -0.000000)
(0.000000  0.000000  -0.000000)
(0.000000  0.000000  -0.000000)
(0.000000  0.000000  -0.000000)
(0.000000  0.000000  -0.000000)
(0.000000  0.000000  -0.000000)
(0.000000  0.000000  -0.000000)
(0.000000  0.000000  -0.000000)
(0.000000  0.000000  -0.000000)
(0.000000  0.000000  -0.000000)
(0.000000  0.000000  -0.000000)
(0.000000  0.000000  -0.000000)
(0.000000  0.000000  -0.000000)
(0.000000  0.000000  -0.000000)
(0.000000  0.000000  -0.000000)
(0.000000  0.000000  -0.000000)
(0.000000  0.000000  -0.000000)
(0.000000  0.000000  -0.000000)
(0.000000  0.000000  -0.000000)
(0.000000  0.000000  -0.000000)
(0.000000  0.000000  -0.000000)
(0.000000  0.000000  -0.000000)
(0.000000  0.000000  -0.000000)
(0.000000  0.000000  -0.000000)
(0.000000  0.000000  -0.000000)
(0.000000  0.000000  -0.000000)
(0.000000  0.000000  -0.000000)
(0.000000  0.000000  -0.000000)
(0.000000  0.000000  -0.000000)
(0.000000  0.000000  -0.000000)
(0.000000  0.000000  -0.000000)
(0.000000  0.000000  -0.000000)
(0.000000  0.000000  -0.000000)
(0.000000  0.000000  -0.000000)
(0.000000  0.000000  -0.000000)
(0.000000  0.000000  -0.000000)
(0.000000  0.000000  -0.000000)
(0.000000  0.000000  -0.000000)
(0.000000  0.000000  -0.000000)
(0.000000  0.000000  -0.000000)
(0.000000  0.000000  -0.000000)
(0.000000  0.000000  -0.000000)
(0.000000  0.000000  -0.000000)
(0.000000  0.000000  -0.000000)
(0.000000  0.000000  -0.000000)
(0.000000  0.000000  -0.000000)
(0.000000  0.000000  -0.000000)
(0.000000  0.000000  -0.000000)
(0.000000  0.000000  -0.000000)
(0.000000  0.000000  -0.000000)
(0.000000  0.000000  -0.000000)
(0.000000  0.000000  -0.000000)
(0.000000  0.000000  -0.000000)
(0.000000  0.000000  -0.000000)
(0.000000  0.000000  -0.000000)
(0.000000  0.000000  -0.000000)
(0.000000  0.000000  -0.000000)
(0.000000  0.000000  -0.000000)
(0.000000  0.000000  -0.000000)
(0.000000  0.000000  -0.000000)
(0.000000  0.000000  -0.000000)
(0.000000  0.000000  -0.000000)
(0.000000  0.000000  -0.000000)
(0.000000  0.000000  -0.000000)
(0.000000  0.000000  -0.000000)
(0.000000  0.000000  -0.000000)
(0.000000  0.000000  -0.000000)
(0.000000  0.000000  -0.000000)
(0.000000  0.000000  -0.000000)
(0.000000  0.000000  -0.000000)
(0.000000  0.000000  -0.000000)
(0.000000  0.000000  -0.000000)
(0.000000  0.000000  -0.000000)
(0.000000  0.000000  -0.000000)
(0.000000  0.000000  -0.000000)
(0.000000  0.000000  -0.000000)
(0.000000  0.000000  -0.000000)
(0.000000  0.000000  -0.000000)
(0.000000  0.000000  -0.000000)
(0.000000  0.000000  -0.000000)
(0.000000  0.000000  -0.000000)
(0.000000  0.000000  -0.000000)
(0.000000  0.000000  -0.000000)
(0.000000  0.000000  -0.000000)
(0.000000  0.000000  -0.000000)
(0.000000  0.000000  -0.000000)
(0.000000  0.000000  -0.000000)
(0.000000  0.000000  -0.000000)
(0.000000  0.000000  -0.000000)
(0.000000  0.000000  -0.000000)
(0.000000  0.000000  -0.000000)
(0.000000  0.000000  -0.000000)
(0.000000  0.000000  -0.000000)
(0.000000  0.000000  -0.000000)
(0.000000  0.000000  -0.000000)
(0.000000  0.000000  -0.000000)
(0.000000  0.000000  -0.000000)
(0.000000  0.000000  -0.000000)
(0.000000  0.000000  -0.000000)
(0.000000  0.000000  -0.000000)
(0.000000  0.000000  -0.000000)
(0.000000  0.000000  -0.000000)
(0.000000  0.000000  -0.000000)
(0.000000  0.000000  -0.000000)
(0.000000  0.000000  -0.000000)
(0.000000  0.000000  -0.000000)
(0.000000  0.000000  -0.000000)
(0.000000  0.000000  -0.000000)
(0.000000  0.000000  -0.000000)
(0.000000  0.000000  -0.000000)
(0.000000  0.000000  -0.000000)
(0.000000  0.000000  -0.000000)
(0.000000  0.000000  -0.000000)
(0.000000  0.000000  -0.000000)
(0.000000  0.000000  -0.000000)
(0.000000  0.000000  -0.000000)
(0.000000  0.000000  -0.000000)
(0.000000  0.000000  -0.000000)
(0.000000  0.000000  -0.000000)
(0.000000  0.000000  -0.000000)
(0.000000  0.000000  -0.000000)
(0.000000  0.000000  -0.000000)
(0.000000  0.000000  -0.000000)
(0.000000  0.000000  -0.000000)
(0.000000  0.000000  -0.000000)
(0.000000  0.000000  -0.000000)
(0.000000  0.000000  -0.000000)
(0.000000  0.000000  -0.000000)
(0.000000  0.000000  -0.000000)
(0.000000  0.000000  -0.000000)
(0.000000  0.000000  -0.000000)
(0.000000  0.000000  -0.000000)
(0.000000  0.000000  -0.000000)
(0.000000  0.000000  -0.000000)
(0.000000  0.000000  -0.000000)
(0.000000  0.000000  -0.000000)
(0.000000  0.000000  -0.000000)
(0.000000  0.000000  -0.000000)
(0.000000  0.000000  -0.000000)
(0.000000  0.000000  -0.000000)
(0.000000  0.000000  -0.000000)
(0.000000  0.000000  -0.000000)
(0.000000  0.000000  -0.000000)
(0.000000  0.000000  -0.000000)
(0.000000  0.000000  -0.000000)
(0.000000  0.000000  -0.000000)
(0.000000  0.000000  -0.000000)
(0.000000  0.000000  -0.000000)
(0.000000  0.000000  -0.000000)
(0.000000  0.000000  -0.000000)
(0.000000  0.000000  -0.000000)
(0.000000  0.000000  -0.000000)
(0.000000  0.000000  -0.000000)
(0.000000  0.000000  -0.000000)
(0.000000  0.000000  -0.000000)
(0.000000  0.000000  -0.000000)
(0.000000  0.000000  -0.000000)
(0.000000  0.000000  -0.000000)
(0.000000  0.000000  -0.000000)
(0.000000  0.000000  -0.000000)
(0.000000  0.000000  -0.000000)
(0.000000  0.000000  -0.000000)
(0.000000  0.000000  -0.000000)
(0.000000  0.000000  -0.000000)
(0.000000  0.000000  -0.000000)
(0.000000  0.000000  -0.000000)
(0.000000  0.000000  -0.000000)
(0.000000  0.000000  -0.000000)
(0.000000  0.000000  -0.000000)
(0.000000  0.000000  -0.000000)
(0.000000  0.000000  -0.000000)
(0.000000  0.000000  -0.000000)
(0.000000  0.000000  -0.000000)
(0.000000  0.000000  -0.000000)
(0.000000  0.000000  -0.000000)
(0.000000  0.000000  -0.000000)
(0.000000  0.000000  -0.000000)
(0.000000  0.000000  -0.000000)
(0.000000  0.000000  -0.000000)
(0.000000  0.000000  -0.000000)
(0.000000  0.000000  -0.000000)
(0.000000  0.000000  -0.000000)
(0.000000  0.000000  -0.000000)
(0.000000  0.000000  -0.000000)
(0.000000  0.000000  -0.000000)
(0.000000  0.000000  -0.000000)
(0.000000  0.000000  -0.000000)
(0.000000  0.000000  -0.000000)
(0.000000  0.000000  -0.000000)
(0.000000  0.000000  -0.000000)
(0.000000  0.000000  -0.000000)
(0.000000  0.000000  -0.000000)
(0.000000  0.000000  -0.000000)
(0.000000  0.000000  -0.000000)
(0.000000  0.000000  -0.000000)
(0.000000  0.000000  -0.000000)
(0.000000  0.000000  -0.000000)
(0.000000  0.000000  -0.000000)
(0.000000  0.000000  -0.000000)
(0.000000  0.000000  -0.000000)
(0.000000  0.000000  -0.000000)
(0.000000  0.000000  -0.000000)
(0.000000  0.000000  -0.000000)
(0.000000  0.000000  -0.000000)
(0.000000  0.000000  -0.000000)
(0.000000  0.000000  -0.000000)
(0.000000  0.000000  -0.000000)
(0.000000  0.000000  -0.000000)
(0.000000  0.000000  -0.000000)
(0.000000  0.000000  -0.000000)
(0.000000  0.000000  -0.000000)
(0.000000  0.000000  -0.000000)
(0.000000  0.000000  -0.000000)
(0.000000  0.000000  -0.000000)
(0.000000  0.000000  -0.000000)
(0.000000  0.000000  -0.000000)
(0.000000  0.000000  -0.000000)
(0.000000  0.000000  -0.000000)
(0.000000  0.000000  -0.000000)
(0.000000  0.000000  -0.000000)
(0.000000  0.000000  -0.000000)
(0.000000  0.000000  -0.000000)
(0.000000  0.000000  -0.000000)
(0.000000  0.000000  -0.000000)
(0.000000  0.000000  -0.000000)
(0.000000  0.000000  -0.000000)
(0.000000  0.000000  -0.000000)
(0.000000  0.000000  -0.000000)
(0.000000  0.000000  -0.000000)
(0.000000  0.000000  -0.000000)
(0.000000  0.000000  -0.000000)
(0.000000  0.000000  -0.000000)
(0.000000  0.000000  -0.000000)
(0.000000  0.000000  -0.000000)
(0.000000  0.000000  -0.000000)
(0.000000  0.000000  -0.000000)
(0.000000  0.000000  -0.000000)
(0.000000  0.000000  -0.000000)
(0.000000  0.000000  -0.000000)
(0.000000  0.000000  -0.000000)
(0.000000  0.000000  -0.000000)
(0.000000  0.000000  -0.000000)
(0.000000  0.000000  -0.000000)
(0.000000  0.000000  -0.000000)
(0.000000  0.000000  -0.000000)
(0.000000  0.000000  -0.000000)
(0.000000  0.000000  -0.000000)
(0.000000  0.000000  -0.000000)
(0.000000  0.000000  -0.000000)
(0.000000  0.000000  -0.000000)
(0.000000  0.000000  -0.000000)
(0.000000  0.000000  -0.000000)
(0.000000  0.000000  -0.000000)
(0.000000  0.000000  -0.000000)
(0.000000  0.000000  -0.000000)
(0.000000  0.000000  -0.000000)
(0.000000  0.000000  -0.000000)
(0.000000  0.000000  -0.000000)
(0.000000  0.000000  -0.000000)
(0.000001  0.000000  -0.000000)
(0.000001  0.000000  -0.000000)
(0.000001  0.000000  -0.000000)
(0.000001  0.000000  -0.000000)
(0.000001  0.000000  -0.000000)
(0.000001  0.000000  -0.000000)
(0.000001  0.000000  -0.000000)
(0.000001  0.000000  -0.000000)
(0.000001  0.000000  -0.000000)
(0.000001  0.000000  -0.000000)
(0.000001  0.000000  -0.000000)
(0.000001  0.000000  -0.000000)
(0.000001  0.000000  -0.000000)
(0.000001  0.000000  -0.000000)
(0.000002  0.000000  -0.000000)
(0.000002  0.000000  -0.000000)
(0.000002  0.000000  -0.000000)
(0.000002  0.000000  -0.000000)
(0.000002  0.000000  -0.000000)
(0.000002  0.000000  -0.000000)
(0.000003  0.000000  -0.000000)
(0.000003  0.000000  -0.000000)
(0.000003  0.000000  -0.000000)
(0.000003  0.000000  -0.000000)
(0.000004  0.000000  -0.000000)
(0.000004  0.000000  -0.000000)
(0.000004  0.000000  -0.000000)
(0.000005  0.000000  -0.000000)
(0.000005  0.000000  -0.000000)
(0.000005  0.000000  -0.000000)
(0.000006  0.000000  -0.000000)
(0.000006  0.000000  -0.000000)
(0.000007  0.000000  -0.000000)
(0.000008  0.000000  -0.000000)
(0.000008  0.000000  -0.000000)
(0.000009  0.000000  -0.000000)
(0.000010  0.000000  -0.000000)
(0.000011  0.000000  -0.000000)
(0.000011  0.000000  -0.000000)
(0.000012  0.000000  -0.000000)
(0.000013  0.000000  -0.000000)
(0.000015  0.000000  -0.000000)
(0.000016  0.000000  -0.000000)
(0.000017  0.000000  -0.000000)
(0.000019  0.000000  -0.000000)
(0.000020  0.000000  -0.000001)
(0.000022  0.000000  -0.000001)
(0.000024  0.000000  -0.000001)
(0.000026  0.000000  -0.000001)
(0.000028  0.000000  -0.000001)
(0.000031  0.000000  -0.000001)
(0.000033  0.000000  -0.000001)
(0.000036  0.000000  -0.000001)
(0.000039  0.000000  -0.000001)
(0.000042  0.000000  -0.000001)
(0.000046  0.000000  -0.000001)
(0.000050  0.000000  -0.000001)
(0.000054  0.000000  -0.000001)
(0.000059  0.000000  -0.000001)
(0.000064  0.000000  -0.000002)
(0.000069  0.000000  -0.000002)
(0.000075  0.000000  -0.000002)
(0.000081  0.000000  -0.000002)
(0.000088  0.000000  -0.000002)
(0.000096  0.000000  -0.000002)
(0.000104  0.000000  -0.000003)
(0.000113  0.000000  -0.000003)
(0.000122  0.000000  -0.000003)
(0.000133  0.000000  -0.000003)
(0.000144  0.000000  -0.000004)
(0.000156  0.000000  -0.000004)
(0.000169  0.000000  -0.000004)
(0.000183  0.000000  -0.000005)
(0.000199  0.000000  -0.000005)
(0.000216  0.000000  -0.000005)
(0.000234  0.000000  -0.000006)
(0.000254  0.000000  -0.000006)
(0.000275  0.000000  -0.000007)
(0.000299  0.000000  -0.000008)
(0.000324  0.000000  -0.000008)
(0.000351  0.000000  -0.000009)
(0.000380  0.000000  -0.000010)
(0.000412  0.000000  -0.000010)
(0.000447  0.000000  -0.000011)
(0.000485  0.000000  -0.000012)
(0.000525  0.000000  -0.000013)
(0.000569  0.000000  -0.000014)
(0.000617  0.000000  -0.000015)
(0.000668  0.000000  -0.000017)
(0.000724  0.000000  -0.000018)
(0.000784  0.000000  -0.000020)
(0.000849  0.000000  -0.000021)
(0.000919  0.000000  -0.000023)
(0.000995  0.000000  -0.000025)
(0.001077  0.000000  -0.000027)
(0.001166  0.000000  -0.000029)
(0.001261  0.000000  -0.000031)
(0.001364  0.000000  -0.000033)
(0.001475  0.000000  -0.000036)
(0.001595  0.000000  -0.000039)
(0.001724  0.000000  -0.000042)
(0.001863  0.000000  -0.000045)
(0.002013  0.000000  -0.000048)
(0.002173  0.000000  -0.000052)
(0.002346  0.000000  -0.000056)
(0.002532  0.000000  -0.000060)
(0.002731  0.000000  -0.000064)
(0.002944  0.000000  -0.000069)
(0.003173  0.000000  -0.000074)
(0.003418  0.000000  -0.000079)
(0.003680  0.000000  -0.000085)
(0.003961  0.000000  -0.000090)
(0.004260  0.000000  -0.000097)
(0.004579  0.000000  -0.000103)
(0.004918  0.000000  -0.000109)
(0.005280  0.000000  -0.000116)
(0.005664  0.000000  -0.000124)
(0.006071  0.000000  -0.000131)
(0.006503  0.000000  -0.000139)
(0.006960  0.000000  -0.000147)
(0.007442  0.000000  -0.000155)
(0.007951  0.000000  -0.000163)
(0.008487  0.000000  -0.000172)
(0.009050  0.000000  -0.000180)
(0.009641  0.000000  -0.000189)
(0.010259  0.000000  -0.000198)
(0.010905  0.000000  -0.000206)
(0.011578  0.000000  -0.000215)
(0.012278  0.000000  -0.000223)
(0.013005  0.000000  -0.000231)
(0.013756  0.000000  -0.000239)
(0.014531  0.000000  -0.000246)
(0.015329  0.000000  -0.000253)
(0.016148  0.000000  -0.000259)
(0.016985  0.000000  -0.000264)
(0.017838  0.000000  -0.000269)
(0.018705  0.000000  -0.000273)
(0.019583  0.000000  -0.000276)
(0.020468  0.000000  -0.000277)
(0.021356  0.000000  -0.000278)
(0.022245  0.000000  -0.000277)
(0.023129  0.000000  -0.000275)
(0.024004  0.000000  -0.000272)
(0.024867  0.000000  -0.000267)
(0.025712  0.000000  -0.000261)
(0.026535  0.000000  -0.000253)
(0.027331  0.000000  -0.000244)
(0.028095  0.000000  -0.000233)
(0.028822  0.000000  -0.000221)
(0.029508  0.000000  -0.000207)
(0.030147  0.000000  -0.000192)
(0.030737  0.000000  -0.000176)
(0.031272  0.000000  -0.000158)
(0.031750  0.000000  -0.000140)
(0.032165  0.000000  -0.000120)
(0.032517  0.000000  -0.000099)
(0.032801  0.000000  -0.000078)
(0.033016  0.000000  -0.000056)
(0.033160  0.000000  -0.000034)
(0.033233  0.000000  -0.000011)
(0.033233  0.000000  0.000011)
(0.033160  0.000000  0.000034)
(0.033016  0.000000  0.000056)
(0.032801  0.000000  0.000078)
(0.032517  0.000000  0.000099)
(0.032165  0.000000  0.000120)
(0.031750  0.000000  0.000140)
(0.031272  0.000000  0.000158)
(0.030737  0.000000  0.000176)
(0.030147  0.000000  0.000192)
(0.029508  0.000000  0.000207)
(0.028822  0.000000  0.000221)
(0.028095  0.000000  0.000233)
(0.027331  0.000000  0.000244)
(0.026535  0.000000  0.000253)
(0.025712  0.000000  0.000261)
(0.024867  0.000000  0.000267)
(0.024004  0.000000  0.000272)
(0.023129  0.000000  0.000275)
(0.022245  0.000000  0.000277)
(0.021356  0.000000  0.000278)
(0.020468  0.000000  0.000277)
(0.019583  0.000000  0.000276)
(0.018705  0.000000  0.000273)
(0.017838  0.000000  0.000269)
(0.016985  0.000000  0.000264)
(0.016148  0.000000  0.000259)
(0.015329  0.000000  0.000253)
(0.014531  0.000000  0.000246)
(0.013756  0.000000  0.000239)
(0.013005  0.000000  0.000231)
(0.012278  0.000000  0.000223)
(0.011578  0.000000  0.000215)
(0.010905  0.000000  0.000206)
(0.010259  0.000000  0.000198)
(0.009641  0.000000  0.000189)
(0.009050  0.000000  0.000180)
(0.008487  0.000000  0.000172)
(0.007951  0.000000  0.000163)
(0.007442  0.000000  0.000155)
(0.006960  0.000000  0.000147)
(0.006503  0.000000  0.000139)
(0.006071  0.000000  0.000131)
(0.005664  0.000000  0.000124)
(0.005280  0.000000  0.000116)
(0.004918  0.000000  0.000109)
(0.004579  0.000000  0.000103)
(0.004260  0.000000  0.000097)
(0.003961  0.000000  0.000090)
(0.003680  0.000000  0.000085)
(0.003418  0.000000  0.000079)
(0.003173  0.000000  0.000074)
(0.002944  0.000000  0.000069)
(0.002731  0.000000  0.000064)
(0.002532  0.000000  0.000060)
(0.002346  0.000000  0.000056)
(0.002173  0.000000  0.000052)
(0.002013  0.000000  0.000048)
(0.001863  0.000000  0.000045)
(0.001724  0.000000  0.000042)
(0.001595  0.000000  0.000039)
(0.001475  0.000000  0.000036)
(0.001364  0.000000  0.000033)
(0.001261  0.000000  0.000031)
(0.001166  0.000000  0.000029)
(0.001077  0.000000  0.000027)
(0.000995  0.000000  0.000025)
(0.000919  0.000000  0.000023)
(0.000849  0.000000  0.000021)
(0.000784  0.000000  0.000020)
(0.000724  0.000000  0.000018)
(0.000668  0.000000  0.000017)
(0.000617  0.000000  0.000015)
(0.000569  0.000000  0.000014)
(0.000525  0.000000  0.000013)
(0.000485  0.000000  0.000012)
(0.000447  0.000000  0.000011)
(0.000412  0.000000  0.000010)
(0.000380  0.000000  0.000010)
(0.000351  0.000000  0.000009)
(0.000324  0.000000  0.000008)
(0.000299  0.000000  0.000008)
(0.000275  0.000000  0.000007)
(0.000254  0.000000  0.000006)
(0.000234  0.000000  0.000006)
(0.000216  0.000000  0.000005)
(0.000199  0.000000  0.000005)
(0.000183  0.000000  0.000005)
(0.000169  0.000000  0.000004)
(0.000156  0.000000  0.000004)
(0.000144  0.000000  0.000004)
(0.000133  0.000000  0.000003)
(0.000122  0.000000  0.000003)
(0.000113  0.000000  0.000003)
(0.000104  0.000000  0.000003)
(0.000096  0.000000  0.000002)
(0.000088  0.000000  0.000002)
(0.000081  0.000000  0.000002)
(0.000075  0.000000  0.000002)
(0.000069  0.000000  0.000002)
(0.000064  0.000000  0.000002)
(0.000059  0.000000  0.000001)
(0.000054  0.000000  0.000001)
(0.000050  0.000000  0.000001)
(0.000046  0.000000  0.000001)
(0.000042  0.000000  0.000001)
(0.000039  0.000000  0.000001)
(0.000036  0.000000  0.000001)
(0.000033  0.000000  0.000001)
(0.000031  0.000000  0.000001)
(0.000028  0.000000  0.000001)
(0.000026  0.000000  0.000001)
(0.000024  0.000000  0.000001)
(0.000022  0.000000  0.000001)
(0.000020  0.000000  0.000001)
(0.000019  0.000000  0.000000)
(0.000017  0.000000  0.000000)
(0.000016  0.000000  0.000000)
(0.000015  0.000000  0.000000)
(0.000013  0.000000  0.000000)
(0.000012  0.000000  0.000000)
(0.000011  0.000000  0.000000)
(0.000011  0.000000  0.000000)
(0.000010  0.000000  0.000000)
(0.000009  0.000000  0.000000)
(-0.000000  0.000000  0.000000)
(-0.000000  0.000000  -0.000000)
(-0.000000  0.000000  0.000000)
(-0.000000  0.000000  -0.000000)
(-0.000000  0.000000  0.000000)
(-0.000000  0.000000  -0.000000)
(-0.000000  0.000000  0.000000)
(-0.000000  0.000000  -0.000000)
(-0.000000  0.000000  0.000000)
(-0.000000  0.000000  -0.000000)
(-0.000000  0.000000  0.000000)
(-0.000000  0.000000  -0.000000)
(-0.000000  0.000000  0.000000)
(-0.000000  0.000000  -0.000000)
(-0.000000  0.000000  0.000000)
(-0.000000  0.000000  -0.000000)
(-0.000000  0.000000  0.000000)
(-0.000000  0.000000  -0.000000)
(-0.000000  0.000000  0.000000)
(-0.000000  0.000000  0.000000)
(-0.000000  0.000000  -0.000000)
(-0.000000  0.000000  -0.000000)
(-0.000000  0.000000  -0.000000)
(-0.000000  0.000000  0.000000)
(-0.000000  0.000000  0.000000)
(-0.000000  0.000000  -0.000000)
(-0.000000  0.000000  0.000000)
(-0.000000  0.000000  -0.000000)
(-0.000000  0.000000  0.000000)
(-0.000000  0.000000  -0.000000)
(-0.000000  0.000000  0.000000)
(-0.000000  0.000000  -0.000000)
(-0.000000  0.000000  -0.000000)
(-0.000000  0.000000  -0.000000)
(-0.000000  0.000000  -0.000000)
(-0.000000  0.000000  -0.000000)
(-0.000000  0.000000  -0.000000)
(-0.000000  0.000000  -0.000000)
(-0.000000  0.000000  0.000000)
(-0.000000  0.000000  0.000000)
(-0.000000  0.000000  -0.000000)
(-0.000000  0.000000  -0.000000)
(-0.000000  0.000000  -0.000000)
(-0.000000  0.000000  0.000000)
(-0.000000  0.000000  0.000000)
(-0.000000  0.000000  -0.000000)
(-0.000000  0.000000  -0.000000)
(-0.000000  0.000000  0.000000)
(-0.000000  0.000000  -0.000000)
(-0.000000  0.000000  -0.000000)
(-0.000000  0.000000  -0.000000)
(-0.000000  0.000000  -0.000000)
(-0.000000  0.000000  0.000000)
(-0.000000  0.000000  0.000000)
(-0.000000  0.000000  0.000000)
(-0.000000  0.000000  -0.000000)
(-0.000000  0.000000  0.000000)
(-0.000000  0.000000  -0.000000)
(-0.000000  0.000000  0.000000)
(-0.000000  0.000000  0.000000)
(-0.000000  0.000000  -0.000000)
(-0.000000  0.000000  0.000000)
(-0.000000  0.000000  -0.000000)
(-0.000000  0.000000  -0.000000)
(-0.000000  0.000000  0.000000)
(-0.000000  0.000000  -0.000000)
(-0.000000  0.000000  0.000000)
(-0.000000  0.000000  -0.000000)
(-0.000000  0.000000  0.000000)
(-0.000000  0.000000  -0.000000)
(-0.000000  0.000000  0.000000)
(-0.000000  0.000000  -0.000000)
(-0.000000  0.000000  0.000000)
(-0.000000  0.000000  0.000000)
(-0.000000  0.000000  -0.000000)
(-0.000000  0.000000  0.000000)
(-0.000000  0.000000  0.000000)
(-0.000000  0.000000  -0.000000)
(-0.000000  0.000000  0.000000)
(-0.000000  0.000000  0.000000)
(-0.000000  0.000000  0.000000)
(-0.000000  0.000000  0.000000)
(-0.000000  0.000000  -0.000000)
(-0.000000  0.000000  -0.000000)
(-0.000000  0.000000  0.000000)
(-0.000000  0.000000  -0.000000)
(-0.000000  0.000000  0.000000)
(-0.000000  0.000000  -0.000000)
(-0.000000  0.000000  0.000000)
(-0.000000  0.000000  -0.000000)
(-0.000000  0.000000  0.000000)
(-0.000000  0.000000  0.000000)
(-0.000000  0.000000  -0.000000)
(-0.000000  0.000000  0.000000)
(-0.000000  0.000000  -0.000000)
(-0.000000  0.000000  0.000000)
(-0.000000  0.000000  -0.000000)
(-0.000000  0.000000  -0.000000)
(-0.000000  0.000000  -0.000000)
(-0.000000  0.000000  -0.000000)
(-0.000000  0.000000  0.000000)
(-0.000000  0.000000  0.000000)
(-0.000000  0.000000  -0.000000)
(-0.000000  0.000000  0.000000)
(-0.000000  0.000000  -0.000000)
(-0.000000  0.000000  0.000000)
(-0.000000  0.000000  0.000000)
(-0.000000  0.000000  -0.000000)
(-0.000000  0.000000  0.000000)
(-0.000000  0.000000  0.000000)
(-0.000000  0.000000  -0.000000)
(-0.000000  0.000000  0.000000)
(-0.000000  0.000000  -0.000000)
(-0.000000  0.000000  0.000000)
(-0.000000  0.000000  -0.000000)
(-0.000000  0.000000  0.000000)
(-0.000000  0.000000  -0.000000)
(-0.000000  0.000000  -0.000000)
(-0.000000  0.000000  0.000000)
(-0.000000  0.000000  0.000000)
(-0.000000  0.000000  -0.000000)
(-0.000000  0.000000  -0.000000)
(0.000000  0.000000  -0.000000)
(-0.000000  0.000000  0.000000)
(-0.000000  0.000000  0.000000)
(0.000000  0.000000  -0.000000)
(0.000000  0.000000  0.000000)
(0.000000  0.000000  -0.000000)
(0.000000  0.000000  0.000000)
(0.000000  0.000000  -0.000000)
(0.000000  0.000000  0.000000)
(0.000000  0.000000  0.000000)
(0.000000  0.000000  -0.000000)
(0.000000  0.000000  0.000000)
(0.000000  0.000000  -0.000000)
(0.000000  0.000000  -0.000000)
(0.000000  0.000000  0.000000)
(0.000000  0.000000  -0.000000)
(0.000000  0.000000  -0.000000)
(0.000000  0.000000  0.000000)
(0.000000  0.000000  -0.000000)
(0.000000  0.000000  0.000000)
(0.000000  0.000000  -0.000000)
(0.000000  0.000000  0.000000)
(0.000000  0.000000  0.000000)
(0.000000  0.000000  -0.000000)
(0.000000  0.000000  0.000000)
(0.000000  0.000000  -0.000000)
(0.000000  0.000000  -0.000000)
(0.000000  0.000000  0.000000)
(0.000000  0.000000  -0.000000)
(0.000000  0.000000  0.000000)
(0.000000  0.000000  -0.000000)
(0.000000  0.000000  0.000000)
(0.000000  0.000000  0.000000)
(0.000000  0.000000  -0.000000)
(0.000000  0.000000  0.000000)
(0.000000  0.000000  -0.000000)
(0.000000  0.000000  -0.000000)
(0.000000  0.000000  -0.000000)
(0.000000  0.000000  -0.000000)
(0.000000  0.000000  -0.000000)
(0.000000  0.000000  -0.000000)
(0.000000  0.000000  0.000000)
(0.000000  0.000000  -0.000000)
(0.000000  0.000000  0.000000)
(0.000000  0.000000  -0.000000)
(0.000000  0.000000  0.000000)
(0.000000  0.000000  -0.000000)
(0.000000  0.000000  -0.000000)
(0.000000  0.000000  -0.000000)
(0.000000  0.000000  0.000000)
(0.000000  0.000000  -0.000000)
(0.000000  0.000000  -0.000000)
(0.000000  0.000000  -0.000000)
(0.000000  0.000000  -0.000000)
(0.000000  0.000000  -0.000000)
(0.000000  0.000000  0.000000)
(0.000000  0.000000  -0.000000)
(0.000000  0.000000  -0.000000)
(0.000000  0.000000  -0.000000)
(0.000000  0.000000  -0.000000)
(0.000000  0.000000  -0.000000)
(0.000000  0.000000  -0.000000)
(0.000000  0.000000  -0.000000)
(0.000000  0.000000  -0.000000)
(0.000000  0.000000  -0.000000)
(0.000000  0.000000  -0.000000)
(0.000000  0.000000  -0.000000)
(0.000000  0.000000  -0.000000)
(0.000000  0.000000  -0.000000)
(0.000000  0.000000  -0.000000)
(0.000000  0.000000  -0.000000)
(0.000000  0.000000  -0.000000)
(0.000000  0.000000  -0.000000)
(0.000000  0.000000  -0.000000)
(0.000000  0.000000  -0.000000)
(0.000000  0.000000  -0.000000)
(0.000000  0.000000  -0.000000)
(0.000000  0.000000  -0.000000)
(0.000000  0.000000  -0.000000)
(0.000000  0.000000  -0.000000)
(0.000000  0.000000  -0.000000)
(0.000000  0.000000  -0.000000)
(0.000000  0.000000  -0.000000)
(0.000000  0.000000  -0.000000)
(0.000000  0.000000  -0.000000)
(0.000000  0.000000  -0.000000)
(0.000000  0.000000  -0.000000)
(0.000000  0.000000  -0.000000)
(0.000000  0.000000  -0.000000)
(0.000000  0.000000  -0.000000)
(0.000000  0.000000  -0.000000)
(0.000000  0.000000  -0.000000)
(0.000000  0.000000  -0.000000)
(0.000000  0.000000  -0.000000)
(0.000000  0.000000  -0.000000)
(0.000000  0.000000  -0.000000)
(0.000000  0.000000  -0.000000)
(0.000000  0.000000  -0.000000)
(0.000000  0.000000  -0.000000)
(0.000000  0.000000  -0.000000)
(0.000000  0.000000  -0.000000)
(0.000000  0.000000  -0.000000)
(0.000000  0.000000  -0.000000)
(0.000000  0.000000  -0.000000)
(0.000000  0.000000  -0.000000)
(0.000000  0.000000  -0.000000)
(0.000000  0.000000  -0.000000)
(0.000000  0.000000  -0.000000)
(0.000000  0.000000  -0.000000)
(0.000000  0.000000  -0.000000)
(0.000000  0.000000  -0.000000)
(0.000000  0.000000  -0.000000)
(0.000000  0.000000  -0.000000)
(0.000000  0.000000  -0.000000)
(0.000000  0.000000  -0.000000)
(0.000000  0.000000  -0.000000)
(0.000000  0.000000  -0.000000)
(0.000000  0.000000  -0.000000)
(0.000000  0.000000  -0.000000)
(0.000000  0.000000  -0.000000)
(0.000000  0.000000  -0.000000)
(0.000000  0.000000  -0.000000)
(0.000000  0.000000  -0.000000)
(0.000000  0.000000  -0.000000)
(0.000000  0.000000  -0.000000)
(0.000000  0.000000  -0.000000)
(0.000000  0.000000  -0.000000)
(0.000000  0.000000  -0.000000)
(0.000000  0.000000  -0.000000)
(0.000000  0.000000  -0.000000)
(0.000000  0.000000  -0.000000)
(0.000000  0.000000  -0.000000)
(0.000000  0.000000  -0.000000)
(0.000000  0.000000  -0.000000)
(0.000000  0.000000  -0.000000)
(0.000000  0.000000  -0.000000)
(0.000000  0.000000  -0.000000)
(0.000000  0.000000  -0.000000)
(0.000000  0.000000  -0.000000)
(0.000000  0.000000  -0.000000)
(0.000000  0.000000  -0.000000)
(0.000000  0.000000  -0.000000)
(0.000000  0.000000  -0.000000)
(0.000000  0.000000  -0.000000)
(0.000000  0.000000  -0.000000)
(0.000000  0.000000  -0.000000)
(0.000000  0.000000  -0.000000)
(0.000000  0.000000  -0.000000)
(0.000000  0.000000  -0.000000)
(0.000000  0.000000  -0.000000)
(0.000000  0.000000  -0.000000)
(0.000000  0.000000  -0.000000)
(0.000000  0.000000  -0.000000)
(0.000000  0.000000  -0.000000)
(0.000000  0.000000  -0.000000)
(0.000000  0.000000  -0.000000)
(0.000000  0.000000  -0.000000)
(0.000000  0.000000  -0.000000)
(0.000000  0.000000  -0.000000)
(0.000000  0.000000  -0.000000)
(0.000000  0.000000  -0.000000)
(0.000000  0.000000  -0.000000)
(0.000000  0.000000  -0.000000)
(0.000000  0.000000  -0.000000)
(0.000000  0.000000  -0.000000)
(0.000000  0.000000  -0.000000)
(0.000000  0.000000  -0.000000)
(0.000000  0.000000  -0.000000)
(0.000000  0.000000  -0.000000)
(0.000000  0.000000  -0.000000)
(0.000000  0.000000  -0.000000)
(0.000000  0.000000  -0.000000)
(0.000000  0.000000  -0.000000)
(0.000000  0.000000  -0.000000)
(0.000000  0.000000  -0.000000)
(0.000000  0.000000  -0.000000)
(0.000000  0.000000  -0.000000)
(0.000000  0.000000  -0.000000)
(0.000000  0.000000  -0.000000)
(0.000000  0.000000  -0.000000)
(0.000000  0.000000  -0.000000)
(0.000000  0.000000  -0.000000)
(0.000000  0.000000  -0.000000)
(0.000000  0.000000  -0.000000)
(0.000000  0.000000  -0.000000)
(0.000000  0.000000  -0.000000)
(0.000000  0.000000  -0.000000)
(0.000000  0.000000  -0.000000)
(0.000000  0.000000  -0.000000)
(0.000000  0.000000  -0.000000)
(0.000000  0.000000  -0.000000)
(0.000000  0.000000  -0.000000)
(0.000000  0.000000  -0.000000)
(0.000000  0.000000  -0.000000)
(0.000000  0.000000  -0.000000)
(0.000000  0.000000  -0.000000)
(0.000000  0.000000  -0.000000)
(0.000000  0.000000  -0.000000)
(0.000000  0.000000  -0.000000)
(0.000000  0.000000  -0.000000)
(0.000000  0.000000  -0.000000)
(0.000000  0.000000  -0.000000)
(0.000000  0.000000  -0.000000)
(0.000000  0.000000  -0.000000)
(0.000000  0.000000  -0.000000)
(0.000000  0.000000  -0.000000)
(0.000000  0.000000  -0.000000)
(0.000000  0.000000  -0.000000)
(0.000000  0.000000  -0.000000)
(0.000000  0.000000  -0.000000)
(0.000000  0.000000  -0.000000)
(0.000000  0.000000  -0.000000)
(0.000000  0.000000  -0.000000)
(0.000000  0.000000  -0.000000)
(0.000000  0.000000  -0.000000)
(0.000000  0.000000  -0.000000)
(0.000000  0.000000  -0.000000)
(0.000000  0.000000  -0.000000)
(0.000000  0.000000  -0.000000)
(0.000000  0.000000  -0.000000)
(0.000000  0.000000  -0.000000)
(0.000000  0.000000  -0.000000)
(0.000000  0.000000  -0.000000)
(0.000000  0.000000  -0.000000)
(0.000000  0.000000  -0.000000)
(0.000000  0.000000  -0.000000)
(0.000000  0.000000  -0.000000)
(0.000000  0.000000  -0.000000)
(0.000000  0.000000  -0.000000)
(0.000000  0.000000  -0.000000)
(0.000000  0.000000  -0.000000)
(0.000000  0.000000  -0.000000)
(0.000000  0.000000  -0.000000)
(0.000000  0.000000  -0.000000)
(0.000000  0.000000  -0.000000)
(0.000000  0.000000  -0.000000)
(0.000000  0.000000  -0.000000)
(0.000000  0.000000  -0.000000)
(0.000000  0.000000  -0.000000)
(0.000000  0.000000  -0.000000)
(0.000000  0.000000  -0.000000)
(0.000000  0.000000  -0.000000)
(0.000000  0.000000  -0.000000)
(0.000000  0.000000  -0.000000)
(0.000000  0.000000  -0.000000)
(0.000000  0.000000  -0.000000)
(0.000000  0.000000  -0.000000)
(0.000000  0.000000  -0.000000)
(0.000000  0.000000  -0.000000)
(0.000000  0.000000  -0.000000)
(0.000000  0.000000  -0.000000)
(0.000000  0.000000  -0.000000)
(0.000000  0.000000  -0.000000)
(0.000000  0.000000  -0.000000)
(0.000000  0.000000  -0.000000)
(0.000000  0.000000  -0.000000)
(0.000000  0.000000  -0.000000)
(0.000000  0.000000  -0.000000)
(0.000000  0.000000  -0.000000)
(0.000000  0.000000  -0.000000)
(0.000000  0.000000  -0.000000)
(0.000000  0.000000  -0.000000)
(0.000000  0.000000  -0.000000)
(0.000000  0.000000  -0.000000)
(0.000000  0.000000  -0.000000)
(0.000000  0.000000  -0.000000)
(0.000000  0.000000  -0.000000)
(0.000000  0.000000  -0.000000)
(0.000000  0.000000  -0.000000)
(0.000000  0.000000  -0.000000)
(0.000000  0.000000  -0.000000)
(0.000000  0.000000  -0.000000)
(0.000000  0.000000  -0.000000)
(0.000000  0.000000  -0.000000)
(0.000000  0.000000  -0.000000)
(0.000000  0.000000  -0.000000)
(0.000000  0.000000  -0.000000)
(0.000000  0.000000  -0.000000)
(0.000000  0.000000  -0.000000)
(0.000000  0.000000  -0.000000)
(0.000000  0.000000  -0.000000)
(0.000000  0.000000  -0.000000)
(0.000000  0.000000  -0.000000)
(0.000000  0.000000  -0.000000)
(0.000000  0.000000  -0.000000)
(0.000000  0.000000  -0.000000)
(0.000000  0.000000  -0.000000)
(0.000000  0.000000  -0.000000)
(0.000000  0.000000  -0.000000)
(0.000000  0.000000  -0.000000)
(0.000000  0.000000  -0.000000)
(0.000000  0.000000  -0.000000)
(0.000000  0.000000  -0.000000)
(0.000000  0.000000  -0.000000)
(0.000000  0.000000  -0.000000)
(0.000000  0.000000  -0.000000)
(0.000000  0.000000  -0.000000)
(0.000000  0.000000  -0.000000)
(0.000000  0.000000  -0.000000)
(0.000000  0.000000  -0.000000)
(0.000000  0.000000  -0.000000)
(0.000000  0.000000  -0.000000)
(0.000000  0.000000  -0.000000)
(0.000000  0.000000  -0.000000)
(0.000000  0.000000  -0.000000)
(0.000000  0.000000  -0.000000)
(0.000000  0.000000  -0.000000)
(0.000000  0.000000  -0.000000)
(0.000000  0.000000  -0.000000)
(0.000000  0.000000  -0.000000)
(0.000000  0.000000  -0.000000)
(0.000000  0.000000  -0.000000)
(0.000000  0.000000  -0.000000)
(0.000000  0.000000  -0.000000)
(0.000000  0.000000  -0.000000)
(0.000000  0.000000  -0.000000)
(0.000000  0.000000  -0.000000)
(0.000000  0.000000  -0.000000)
(0.000000  0.000000  -0.000000)
(0.000000  0.000000  -0.000000)
(0.000000  0.000000  -0.000000)
(0.000000  0.000000  -0.000000)
(0.000000  0.000000  -0.000000)
(0.000000  0.000000  -0.000000)
(0.000000  0.000000  -0.000000)
(0.000000  0.000000  -0.000000)
(0.000000  0.000000  -0.000000)
(0.000000  0.000000  -0.000000)
(0.000000  0.000000  -0.000000)
(0.000000  0.000000  -0.000000)
(0.000000  0.000000  -0.000000)
(0.000000  0.000000  -0.000000)
(0.000000  0.000000  -0.000000)
(0.000000  0.000000  -0.000000)
(0.000000  0.000000  -0.000000)
(0.000000  0.000000  -0.000000)
(0.000000  0.000000  -0.000000)
(0.000000  0.000000  -0.000000)
(0.000000  0.000000  -0.000000)
(0.000000  0.000000  -0.000000)
(0.000000  0.000000  -0.000000)
(0.000000  0.000000  -0.000000)
(0.000000  0.000000  -0.000000)
(0.000001  0.000000  -0.000000)
(0.000001  0.000000  -0.000000)
(0.000001  0.000000  -0.000000)
(0.000001  0.000000  -0.000000)
(0.000001  0.000000  -0.000000)
(0.000001  0.000000  -0.000000)
(0.000001  0.000000  -0.000000)
(0.000001  0.000000  -0.000000)
(0.000001  0.000000  -0.000000)
(0.000001  0.000000  -0.000000)
(0.000001  0.000000  -0.000000)
(0.000001  0.000000  -0.000000)
(0.000001  0.000000  -0.000000)
(0.000001  0.000000  -0.000000)
(0.000002  0.000000  -0.000000)
(0.000002  0.000000  -0.000000)
(0.000002  0.000000  -0.000000)
(0.000002  0.000000  -0.000000)
(0.000002  0.000000  -0.000000)
(0.000002  0.000000  -0.000000)
(0.000003  0.000000  -0.000000)
(0.000003  0.000000  -0.000000)
(0.000003  0.000000  -0.000000)
(0.000003  0.000000  -0.000000)
(0.000004  0.000000  -0.000000)
(0.000004  0.000000  -0.000000)
(0.000004  0.000000  -0.000000)
(0.000005  0.000000  -0.000000)
(0.000005  0.000000  -0.000000)
(0.000005  0.000000  -0.000000)
(0.000006  0.000000  -0.000000)
(0.000006  0.000000  -0.000000)
(0.000007  0.000000  -0.000000)
(0.000008  0.000000  -0.000000)
(0.000008  0.000000  -0.000000)
(0.000009  0.000000  -0.000000)
(0.000010  0.000000  -0.000000)
(0.000011  0.000000  -0.000000)
(0.000011  0.000000  -0.000000)
(0.000012  0.000000  -0.000000)
(0.000013  0.000000  -0.000000)
(0.000015  0.000000  -0.000001)
(0.000016  0.000000  -0.000001)
(0.000017  0.000000  -0.000001)
(0.000019  0.000000  -0.000001)
(0.000020  0.000000  -0.000001)
(0.000022  0.000000  -0.000001)
(0.000024  0.000000  -0.000001)
(0.000026  0.000000  -0.000001)
(0.000028  0.000000  -0.000001)
(0.000031  0.000000  -0.000001)
(0.000033  0.000000  -0.000001)
(0.000036  0.000000  -0.000001)
(0.000039  0.000000  -0.000001)
(0.000042  0.000000  -0.000002)
(0.000046  0.000000  -0.000002)
(0.000050  0.000000  -0.000002)
(0.000054  0.000000  -0.000002)
(0.000059  0.000000  -0.000002)
(0.000064  0.000000  -0.000002)
(0.000069  0.000000  -0.000002)
(0.000075  0.000000  -0.000003)
(0.000081  0.000000  -0.000003)
(0.000088  0.000000  -0.000003)
(0.000096  0.000000  -0.000003)
(0.000104  0.000000  -0.000004)
(0.000113  0.000000  -0.000004)
(0.000122  0.000000  -0.000004)
(0.000132  0.000000  -0.000005)
(0.000144  0.000000  -0.000005)
(0.000156  0.000000  -0.000006)
(0.000169  0.000000  -0.000006)
(0.000183  0.000000  -0.000007)
(0.000199  0.000000  -0.000007)
(0.000216  0.000000  -0.000008)
(0.000234  0.000000  -0.000008)
(0.000254  0.000000  -0.000009)
(0.000275  0.000000  -0.000010)
(0.000298  0.000000  -0.000011)
(0.000324  0.000000  -0.000011)
(0.000351  0.000000  -0.000012)
(0.000380  0.000000  -0.000013)
(0.000412  0.000000  -0.000015)
(0.000447  0.000000  -0.000016)
(0.000484  0.000000  -0.000017)
(0.000525  0.000000  -0.000018)
(0.000569  0.000000  -0.000020)
(0.000616  0.000000  -0.000022)
(0.000668  0.000000  -0.000023)
(0.000724  0.000000  -0.000025)
(0.000784  0.000000  -0.000027)
(0.000849  0.000000  -0.000030)
(0.000919  0.000000  -0.000032)
(0.000995  0.000000  -0.000035)
(0.001077  0.000000  -0.000037)
(0.001165  0.000000  -0.000040)
(0.001261  0.000000  -0.000043)
(0.001364  0.000000  -0.000047)
(0.001475  0.000000  -0.000050)
(0.001595  0.000000  -0.000054)
(0.001724  0.000000  -0.000059)
(0.001863  0.000000  -0.000063)
(0.002012  0.000000  -0.000068)
(0.002173  0.000000  -0.000073)
(0.002346  0.000000  -0.000078)
(0.002531  0.000000  -0.000084)
(0.002730  0.000000  -0.000090)
(0.002944  0.000000  -0.000097)
(0.003173  0.000000  -0.000104)
(0.003418  0.000000  -0.000111)
(0.003680  0.000000  -0.000119)
(0.003960  0.000000  -0.000127)
(0.004259  0.000000  -0.000135)
(0.004578  0.000000  -0.000144)
(0.004917  0.000000  -0.000153)
(0.005278  0.000000  -0.000163)
(0.005662  0.000000  -0.000173)
(0.006070  0.000000  -0.000184)
(0.006502  0.000000  -0.000194)
(0.006958  0.000000  -0.000205)
(0.007441  0.000000  -0.000217)
(0.007950  0.000000  -0.000229)
(0.008486  0.000000  -0.000240)
(0.009049  0.000000  -0.000252)
(0.009639  0.000000  -0.000264)
(0.010258  0.000000  -0.000277)
(0.010904  0.000000  -0.000289)
(0.011577  0.000000  -0.000300)
(0.012277  0.000000  -0.000312)
(0.013003  0.000000  -0.000323)
(0.013755  0.000000  -0.000334)
(0.014530  0.000000  -0.000344)
(0.015328  0.000000  -0.000354)
(0.016147  0.000000  -0.000362)
(0.016984  0.000000  -0.000370)
(0.017838  0.000000  -0.000377)
(0.018705  0.000000  -0.000382)
(0.019582  0.000000  -0.000386)
(0.020467  0.000000  -0.000388)
(0.021356  0.000000  -0.000389)
(0.022245  0.000000  -0.000388)
(0.023129  0.000000  -0.000385)
(0.024005  0.000000  -0.000381)
(0.024868  0.000000  -0.000374)
(0.025713  0.000000  -0.000365)
(0.026536  0.000000  -0.000354)
(0.027332  0.000000  -0.000341)
(0.028096  0.000000  -0.000326)
(0.028824  0.000000  -0.000309)
(0.029510  0.000000  -0.000290)
(0.030150  0.000000  -0.000269)
(0.030740  0.000000  -0.000246)
(0.031275  0.000000  -0.000222)
(0.031752  0.000000  -0.000196)
(0.032168  0.000000  -0.000168)
(0.032520  0.000000  -0.000139)
(0.032804  0.000000  -0.000109)
(0.033019  0.000000  -0.000079)
(0.033164  0.000000  -0.000047)
(0.033236  0.000000  -0.000016)
(0.033236  0.000000  0.000016)
(0.033164  0.000000  0.000047)
(0.033019  0.000000  0.000079)
(0.032804  0.000000  0.000109)
(0.032520  0.000000  0.000139)
(0.032168  0.000000  0.000168)
(0.031752  0.000000  0.000196)
(0.031275  0.000000  0.000222)
(0.030740  0.000000  0.000246)
(0.030150  0.000000  0.000269)
(0.029510  0.000000  0.000290)
(0.028824  0.000000  0.000309)
(0.028096  0.000000  0.000326)
(0.027332  0.000000  0.000341)
(0.026536  0.000000  0.000354)
(0.025713  0.000000  0.000365)
(0.024868  0.000000  0.000374)
(0.024005  0.000000  0.000381)
(0.023129  0.000000  0.000385)
(0.022245  0.000000  0.000388)
(0.021356  0.000000  0.000389)
(0.020467  0.000000  0.000388)
(0.019582  0.000000  0.000386)
(0.018705  0.000000  0.000382)
(0.017838  0.000000  0.000377)
(0.016984  0.000000  0.000370)
(0.016147  0.000000  0.000362)
(0.015328  0.000000  0.000354)
(0.014530  0.000000  0.000344)
(0.013755  0.000000  0.000334)
(0.013003  0.000000  0.000323)
(0.012277  0.000000  0.000312)
(0.011577  0.000000  0.000300)
(0.010904  0.000000  0.000289)
(0.010258  0.000000  0.000277)
(0.009639  0.000000  0.000264)
(0.009049  0.000000  0.000252)
(0.008486  0.000000  0.000240)
(0.007950  0.000000  0.000229)
(0.007441  0.000000  0.000217)
(0.006958  0.000000  0.000205)
(0.006502  0.000000  0.000194)
(0.006070  0.000000  0.000184)
(0.005662  0.000000  0.000173)
(0.005278  0.000000  0.000163)
(0.004917  0.000000  0.000153)
(0.004578  0.000000  0.000144)
(0.004259  0.000000  0.000135)
(0.003960  0.000000  0.000127)
(0.003680  0.000000  0.000119)
(0.003418  0.000000  0.000111)
(0.003173  0.000000  0.000104)
(0.002944  0.000000  0.000097)
(0.002730  0.000000  0.000090)
(0.002531  0.000000  0.000084)
(0.002346  0.000000  0.000078)
(0.002173  0.000000  0.000073)
(0.002012  0.000000  0.000068)
(0.001863  0.000000  0.000063)
(0.001724  0.000000  0.000059)
(0.001595  0.000000  0.000054)
(0.001475  0.000000  0.000050)
(0.001364  0.000000  0.000047)
(0.001261  0.000000  0.000043)
(0.001165  0.000000  0.000040)
(0.001077  0.000000  0.000037)
(0.000995  0.000000  0.000035)
(0.000919  0.000000  0.000032)
(0.000849  0.000000  0.000030)
(0.000784  0.000000  0.000027)
(0.000724  0.000000  0.000025)
(0.000668  0.000000  0.000023)
(0.000616  0.000000  0.000022)
(0.000569  0.000000  0.000020)
(0.000525  0.000000  0.000018)
(0.000484  0.000000  0.000017)
(0.000447  0.000000  0.000016)
(0.000412  0.000000  0.000015)
(0.000380  0.000000  0.000013)
(0.000351  0.000000  0.000012)
(0.000324  0.000000  0.000011)
(0.000298  0.000000  0.000011)
(0.000275  0.000000  0.000010)
(0.000254  0.000000  0.000009)
(0.000234  0.000000  0.000008)
(0.000216  0.000000  0.000008)
(0.000199  0.000000  0.000007)
(0.000183  0.000000  0.000007)
(0.000169  0.000000  0.000006)
(0.000156  0.000000  0.000006)
(0.000144  0.000000  0.000005)
(0.000132  0.000000  0.000005)
(0.000122  0.000000  0.000004)
(0.000113  0.000000  0.000004)
(0.000104  0.000000  0.000004)
(0.000096  0.000000  0.000003)
(0.000088  0.000000  0.000003)
(0.000081  0.000000  0.000003)
(0.000075  0.000000  0.000003)
(0.000069  0.000000  0.000002)
(0.000064  0.000000  0.000002)
(0.000059  0.000000  0.000002)
(0.000054  0.000000  0.000002)
(0.000050  0.000000  0.000002)
(0.000046  0.000000  0.000002)
(0.000042  0.000000  0.000002)
(0.000039  0.000000  0.000001)
(0.000036  0.000000  0.000001)
(0.000033  0.000000  0.000001)
(0.000031  0.000000  0.000001)
(0.000028  0.000000  0.000001)
(0.000026  0.000000  0.000001)
(0.000024  0.000000  0.000001)
(0.000022  0.000000  0.000001)
(0.000020  0.000000  0.000001)
(0.000019  0.000000  0.000001)
(0.000017  0.000000  0.000001)
(0.000016  0.000000  0.000001)
(0.000015  0.000000  0.000001)
(0.000013  0.000000  0.000000)
(0.000012  0.000000  0.000000)
(0.000011  0.000000  0.000000)
(0.000011  0.000000  0.000000)
(0.000010  0.000000  0.000000)
(0.000009  0.000000  0.000000)
(0.000000  0.000000  0.000000)
(0.000000  0.000000  -0.000000)
(0.000000  0.000000  0.000000)
(0.000000  0.000000  -0.000000)
(0.000000  0.000000  0.000000)
(0.000000  0.000000  -0.000000)
(0.000000  0.000000  0.000000)
(0.000000  0.000000  -0.000000)
(0.000000  0.000000  -0.000000)
(0.000000  0.000000  -0.000000)
(0.000000  0.000000  -0.000000)
(0.000000  0.000000  0.000000)
(0.000000  0.000000  -0.000000)
(0.000000  0.000000  0.000000)
(0.000000  0.000000  0.000000)
(0.000000  0.000000  -0.000000)
(0.000000  0.000000  0.000000)
(0.000000  0.000000  0.000000)
(0.000000  0.000000  0.000000)
(0.000000  0.000000  -0.000000)
(0.000000  0.000000  0.000000)
(0.000000  0.000000  -0.000000)
(0.000000  0.000000  -0.000000)
(0.000000  0.000000  -0.000000)
(0.000000  0.000000  -0.000000)
(0.000000  0.000000  0.000000)
(0.000000  0.000000  -0.000000)
(0.000000  0.000000  0.000000)
(0.000000  0.000000  0.000000)
(0.000000  0.000000  -0.000000)
(0.000000  0.000000  -0.000000)
(0.000000  0.000000  -0.000000)
(0.000000  0.000000  -0.000000)
(0.000000  0.000000  0.000000)
(0.000000  0.000000  -0.000000)
(0.000000  0.000000  0.000000)
(0.000000  0.000000  -0.000000)
(0.000000  0.000000  -0.000000)
(0.000000  0.000000  -0.000000)
(0.000000  0.000000  -0.000000)
(0.000000  0.000000  0.000000)
(0.000000  0.000000  -0.000000)
(0.000000  0.000000  0.000000)
(0.000000  0.000000  0.000000)
(0.000000  0.000000  -0.000000)
(0.000000  0.000000  0.000000)
(0.000000  0.000000  -0.000000)
(0.000000  0.000000  0.000000)
(0.000000  0.000000  -0.000000)
(0.000000  0.000000  -0.000000)
(0.000000  0.000000  0.000000)
(0.000000  0.000000  -0.000000)
(0.000000  0.000000  -0.000000)
(0.000000  0.000000  0.000000)
(0.000000  0.000000  -0.000000)
(0.000000  0.000000  0.000000)
(0.000000  0.000000  -0.000000)
(0.000000  0.000000  0.000000)
(0.000000  0.000000  0.000000)
(0.000000  0.000000  -0.000000)
(0.000000  0.000000  -0.000000)
(0.000000  0.000000  0.000000)
(0.000000  0.000000  -0.000000)
(0.000000  0.000000  -0.000000)
(0.000000  0.000000  0.000000)
(0.000000  0.000000  -0.000000)
(0.000000  0.000000  0.000000)
(0.000000  0.000000  -0.000000)
(-0.000000  0.000000  0.000000)
(0.000000  0.000000  -0.000000)
(0.000000  0.000000  0.000000)
(0.000000  0.000000  -0.000000)
(-0.000000  0.000000  0.000000)
(0.000000  0.000000  0.000000)
(0.000000  0.000000  0.000000)
(0.000000  0.000000  -0.000000)
(0.000000  0.000000  0.000000)
(0.000000  0.000000  -0.000000)
(0.000000  0.000000  0.000000)
(0.000000  0.000000  -0.000000)
(0.000000  0.000000  0.000000)
(0.000000  0.000000  0.000000)
(0.000000  0.000000  -0.000000)
(0.000000  0.000000  0.000000)
(0.000000  0.000000  -0.000000)
(0.000000  0.000000  0.000000)
(0.000000  0.000000  -0.000000)
(0.000000  0.000000  -0.000000)
(0.000000  0.000000  0.000000)
(0.000000  0.000000  -0.000000)
(0.000000  0.000000  -0.000000)
(0.000000  0.000000  0.000000)
(0.000000  0.000000  0.000000)
(0.000000  0.000000  0.000000)
(0.000000  0.000000  -0.000000)
(0.000000  0.000000  -0.000000)
(0.000000  0.000000  -0.000000)
(0.000000  0.000000  -0.000000)
(0.000000  0.000000  0.000000)
(0.000000  0.000000  -0.000000)
(0.000000  0.000000  -0.000000)
(0.000000  0.000000  0.000000)
(0.000000  0.000000  -0.000000)
(0.000000  0.000000  0.000000)
(0.000000  0.000000  0.000000)
(0.000000  0.000000  -0.000000)
(0.000000  0.000000  -0.000000)
(0.000000  0.000000  0.000000)
(0.000000  0.000000  -0.000000)
(0.000000  0.000000  -0.000000)
(0.000000  0.000000  0.000000)
(0.000000  0.000000  -0.000000)
(0.000000  0.000000  0.000000)
(0.000000  0.000000  0.000000)
(0.000000  0.000000  -0.000000)
(0.000000  0.000000  0.000000)
(0.000000  0.000000  0.000000)
(0.000000  0.000000  -0.000000)
(0.000000  0.000000  -0.000000)
(0.000000  0.000000  0.000000)
(0.000000  0.000000  0.000000)
(0.000000  0.000000  0.000000)
(0.000000  0.000000  -0.000000)
(0.000000  0.000000  0.000000)
(0.000000  0.000000  -0.000000)
(0.000000  0.000000  -0.000000)
(0.000000  0.000000  0.000000)
(0.000000  0.000000  -0.000000)
(0.000000  0.000000  0.000000)
(0.000000  0.000000  -0.000000)
(0.000000  0.000000  0.000000)
(0.000000  0.000000  -0.000000)
(0.000000  0.000000  0.000000)
(0.000000  0.000000  0.000000)
(0.000000  0.000000  -0.000000)
(0.000000  0.000000  -0.000000)
(0.000000  0.000000  -0.000000)
(0.000000  0.000000  -0.000000)
(0.000000  0.000000  0.000000)
(0.000000  0.000000  -0.000000)
(0.000000  0.000000  0.000000)
(0.000000  0.000000  -0.000000)
(0.000000  0.000000  0.000000)
(0.000000  0.000000  -0.000000)
(0.000000  0.000000  0.000000)
(0.000000  0.000000  -0.000000)
(0.000000  0.000000  0.000000)
(0.000000  0.000000  -0.000000)
(0.000000  0.000000  -0.000000)
(0.000000  0.000000  0.000000)
(0.000000  0.000000  -0.000000)
(0.000000  0.000000  -0.000000)
(0.000000  0.000000  0.000000)
(0.000000  0.000000  0.000000)
(0.000000  0.000000  -0.000000)
(0.000000  0.000000  0.000000)
(0.000000  0.000000  -0.000000)
(0.000000  0.000000  0.000000)
(0.000000  0.000000  -0.000000)
(0.000000  0.000000  0.000000)
(0.000000  0.000000  -0.000000)
(0.000000  0.000000  0.000000)
(0.000000  0.000000  -0.000000)
(0.000000  0.000000  -0.000000)
(0.000000  0.000000  -0.000000)
(0.000000  0.000000  -0.000000)
(0.000000  0.000000  -0.000000)
(0.000000  0.000000  0.000000)
(0.000000  0.000000  -0.000000)
(0.000000  0.000000  -0.000000)
(0.000000  0.000000  -0.000000)
(0.000000  0.000000  -0.000000)
(0.000000  0.000000  -0.000000)
(0.000000  0.000000  -0.000000)
(0.000000  0.000000  -0.000000)
(0.000000  0.000000  0.000000)
(0.000000  0.000000  -0.000000)
(0.000000  0.000000  0.000000)
(0.000000  0.000000  -0.000000)
(0.000000  0.000000  -0.000000)
(0.000000  0.000000  -0.000000)
(0.000000  0.000000  0.000000)
(0.000000  0.000000  -0.000000)
(0.000000  0.000000  -0.000000)
(0.000000  0.000000  -0.000000)
(0.000000  0.000000  -0.000000)
(0.000000  0.000000  -0.000000)
(0.000000  0.000000  -0.000000)
(0.000000  0.000000  -0.000000)
(0.000000  0.000000  -0.000000)
(0.000000  0.000000  -0.000000)
(0.000000  0.000000  -0.000000)
(0.000000  0.000000  -0.000000)
(0.000000  0.000000  -0.000000)
(0.000000  0.000000  -0.000000)
(0.000000  0.000000  -0.000000)
(0.000000  0.000000  -0.000000)
(0.000000  0.000000  -0.000000)
(0.000000  0.000000  -0.000000)
(0.000000  0.000000  -0.000000)
(0.000000  0.000000  -0.000000)
(0.000000  0.000000  -0.000000)
(0.000000  0.000000  -0.000000)
(0.000000  0.000000  -0.000000)
(0.000000  0.000000  -0.000000)
(0.000000  0.000000  -0.000000)
(0.000000  0.000000  -0.000000)
(0.000000  0.000000  -0.000000)
(0.000000  0.000000  -0.000000)
(0.000000  0.000000  -0.000000)
(0.000000  0.000000  -0.000000)
(0.000000  0.000000  -0.000000)
(0.000000  0.000000  -0.000000)
(0.000000  0.000000  -0.000000)
(0.000000  0.000000  -0.000000)
(0.000000  0.000000  -0.000000)
(0.000000  0.000000  -0.000000)
(0.000000  0.000000  -0.000000)
(0.000000  0.000000  -0.000000)
(0.000000  0.000000  -0.000000)
(0.000000  0.000000  -0.000000)
(0.000000  0.000000  -0.000000)
(0.000000  0.000000  -0.000000)
(0.000000  0.000000  -0.000000)
(0.000000  0.000000  -0.000000)
(0.000000  0.000000  -0.000000)
(0.000000  0.000000  -0.000000)
(0.000000  0.000000  -0.000000)
(0.000000  0.000000  -0.000000)
(0.000000  0.000000  -0.000000)
(0.000000  0.000000  -0.000000)
(0.000000  0.000000  -0.000000)
(0.000000  0.000000  -0.000000)
(0.000000  0.000000  -0.000000)
(0.000000  0.000000  -0.000000)
(0.000000  0.000000  -0.000000)
(0.000000  0.000000  -0.000000)
(0.000000  0.000000  -0.000000)
(0.000000  0.000000  -0.000000)
(0.000000  0.000000  -0.000000)
(0.000000  0.000000  -0.000000)
(0.000000  0.000000  -0.000000)
(0.000000  0.000000  -0.000000)
(0.000000  0.000000  -0.000000)
(0.000000  0.000000  -0.000000)
(0.000000  0.000000  -0.000000)
(0.000000  0.000000  -0.000000)
(0.000000  0.000000  -0.000000)
(0.000000  0.000000  -0.000000)
(0.000000  0.000000  -0.000000)
(0.000000  0.000000  -0.000000)
(0.000000  0.000000  -0.000000)
(0.000000  0.000000  -0.000000)
(0.000000  0.000000  -0.000000)
(0.000000  0.000000  -0.000000)
(0.000000  0.000000  -0.000000)
(0.000000  0.000000  -0.000000)
(0.000000  0.000000  -0.000000)
(0.000000  0.000000  -0.000000)
(0.000000  0.000000  -0.000000)
(0.000000  0.000000  -0.000000)
(0.000000  0.000000  -0.000000)
(0.000000  0.000000  -0.000000)
(0.000000  0.000000  -0.000000)
(0.000000  0.000000  -0.000000)
(0.000000  0.000000  -0.000000)
(0.000000  0.000000  -0.000000)
(0.000000  0.000000  -0.000000)
(0.000000  0.000000  -0.000000)
(0.000000  0.000000  -0.000000)
(0.000000  0.000000  -0.000000)
(0.000000  0.000000  -0.000000)
(0.000000  0.000000  -0.000000)
(0.000000  0.000000  -0.000000)
(0.000000  0.000000  -0.000000)
(0.000000  0.000000  -0.000000)
(0.000000  0.000000  -0.000000)
(0.000000  0.000000  -0.000000)
(0.000000  0.000000  -0.000000)
(0.000000  0.000000  -0.000000)
(0.000000  0.000000  -0.000000)
(0.000000  0.000000  -0.000000)
(0.000000  0.000000  -0.000000)
(0.000000  0.000000  -0.000000)
(0.000000  0.000000  -0.000000)
(0.000000  0.000000  -0.000000)
(0.000000  0.000000  -0.000000)
(0.000000  0.000000  -0.000000)
(0.000000  0.000000  -0.000000)
(0.000000  0.000000  -0.000000)
(0.000000  0.000000  -0.000000)
(0.000000  0.000000  -0.000000)
(0.000000  0.000000  -0.000000)
(0.000000  0.000000  -0.000000)
(0.000000  0.000000  -0.000000)
(0.000000  0.000000  -0.000000)
(0.000000  0.000000  -0.000000)
(0.000000  0.000000  -0.000000)
(0.000000  0.000000  -0.000000)
(0.000000  0.000000  -0.000000)
(0.000000  0.000000  -0.000000)
(0.000000  0.000000  -0.000000)
(0.000000  0.000000  -0.000000)
(0.000000  0.000000  -0.000000)
(0.000000  0.000000  -0.000000)
(0.000000  0.000000  -0.000000)
(0.000000  0.000000  -0.000000)
(0.000000  0.000000  -0.000000)
(0.000000  0.000000  -0.000000)
(0.000000  0.000000  -0.000000)
(0.000000  0.000000  -0.000000)
(0.000000  0.000000  -0.000000)
(0.000000  0.000000  -0.000000)
(0.000000  0.000000  -0.000000)
(0.000000  0.000000  -0.000000)
(0.000000  0.000000  -0.000000)
(0.000000  0.000000  -0.000000)
(0.000000  0.000000  -0.000000)
(0.000000  0.000000  -0.000000)
(0.000000  0.000000  -0.000000)
(0.000000  0.000000  -0.000000)
(0.000000  0.000000  -0.000000)
(0.000000  0.000000  -0.000000)
(0.000000  0.000000  -0.000000)
(0.000000  0.000000  -0.000000)
(0.000000  0.000000  -0.000000)
(0.000000  0.000000  -0.000000)
(0.000000  0.000000  -0.000000)
(0.000000  0.000000  -0.000000)
(0.000000  0.000000  -0.000000)
(0.000000  0.000000  -0.000000)
(0.000000  0.000000  -0.000000)
(0.000000  0.000000  -0.000000)
(0.000000  0.000000  -0.000000)
(0.000000  0.000000  -0.000000)
(0.000000  0.000000  -0.000000)
(0.000000  0.000000  -0.000000)
(0.000000  0.000000  -0.000000)
(0.000000  0.000000  -0.000000)
(0.000000  0.000000  -0.000000)
(0.000000  0.000000  -0.000000)
(0.000000  0.000000  -0.000000)
(0.000000  0.000000  -0.000000)
(0.000000  0.000000  -0.000000)
(0.000000  0.000000  -0.000000)
(0.000000  0.000000  -0.000000)
(0.000000  0.000000  -0.000000)
(0.000000  0.000000  -0.000000)
(0.000000  0.000000  -0.000000)
(0.000000  0.000000  -0.000000)
(0.000000  0.000000  -0.000000)
(0.000000  0.000000  -0.000000)
(0.000000  0.000000  -0.000000)
(0.000000  0.000000  -0.000000)
(0.000000  0.000000  -0.000000)
(0.000000  0.000000  -0.000000)
(0.000000  0.000000  -0.000000)
(0.000000  0.000000  -0.000000)
(0.000000  0.000000  -0.000000)
(0.000000  0.000000  -0.000000)
(0.000000  0.000000  -0.000000)
(0.000000  0.000000  -0.000000)
(0.000000  0.000000  -0.000000)
(0.000000  0.000000  -0.000000)
(0.000000  0.000000  -0.000000)
(0.000000  0.000000  -0.000000)
(0.000000  0.000000  -0.000000)
(0.000000  0.000000  -0.000000)
(0.000000  0.000000  -0.000000)
(0.000000  0.000000  -0.000000)
(0.000000  0.000000  -0.000000)
(0.000000  0.000000  -0.000000)
(0.000000  0.000000  -0.000000)
(0.000000  0.000000  -0.000000)
(0.000000  0.000000  -0.000000)
(0.000000  0.000000  -0.000000)
(0.000000  0.000000  -0.000000)
(0.000000  0.000000  -0.000000)
(0.000000  0.000000  -0.000000)
(0.000000  0.000000  -0.000000)
(0.000000  0.000000  -0.000000)
(0.000000  0.000000  -0.000000)
(0.000000  0.000000  -0.000000)
(0.000000  0.000000  -0.000000)
(0.000000  0.000000  -0.000000)
(0.000000  0.000000  -0.000000)
(0.000000  0.000000  -0.000000)
(0.000000  0.000000  -0.000000)
(0.000000  0.000000  -0.000000)
(0.000000  0.000000  -0.000000)
(0.000000  0.000000  -0.000000)
(0.000000  0.000000  -0.000000)
(0.000000  0.000000  -0.000000)
(0.000000  0.000000  -0.000000)
(0.000000  0.000000  -0.000000)
(0.000000  0.000000  -0.000000)
(0.000000  0.000000  -0.000000)
(0.000000  0.000000  -0.000000)
(0.000000  0.000000  -0.000000)
(0.000000  0.000000  -0.000000)
(0.000000  0.000000  -0.000000)
(0.000000  0.000000  -0.000000)
(0.000000  0.000000  -0.000000)
(0.000000  0.000000  -0.000000)
(0.000000  0.000000  -0.000000)
(0.000000  0.000000  -0.000000)
(0.000000  0.000000  -0.000000)
(0.000000  0.000000  -0.000000)
(0.000000  0.000000  -0.000000)
(0.000000  0.000000  -0.000000)
(0.000000  0.000000  -0.000000)
(0.000000  0.000000  -0.000000)
(0.000000  0.000000  -0.000000)
(0.000000  0.000000  -0.000000)
(0.000000  0.000000  -0.000000)
(0.000000  0.000000  -0.000000)
(0.000000  0.000000  -0.000000)
(0.000000  0.000000  -0.000000)
(0.000000  0.000000  -0.000000)
(0.000000  0.000000  -0.000000)
(0.000000  0.000000  -0.000000)
(0.000000  0.000000  -0.000000)
(0.000000  0.000000  -0.000000)
(0.000000  0.000000  -0.000000)
(0.000000  0.000000  -0.000000)
(0.000000  0.000000  -0.000000)
(0.000000  0.000000  -0.000000)
(0.000000  0.000000  -0.000000)
(0.000000  0.000000  -0.000000)
(0.000000  0.000000  -0.000000)
(0.000000  0.000000  -0.000000)
(0.000000  0.000000  -0.000000)
(0.000000  0.000000  -0.000000)
(0.000000  0.000000  -0.000000)
(0.000000  0.000000  -0.000000)
(0.000000  0.000000  -0.000000)
(0.000000  0.000000  -0.000000)
(0.000000  0.000000  -0.000000)
(0.000000  0.000000  -0.000000)
(0.000000  0.000000  -0.000000)
(0.000000  0.000000  -0.000000)
(0.000000  0.000000  -0.000000)
(0.000000  0.000000  -0.000000)
(0.000000  0.000000  -0.000000)
(0.000000  0.000000  -0.000000)
(0.000000  0.000000  -0.000000)
(0.000000  0.000000  -0.000000)
(0.000000  0.000000  -0.000000)
(0.000000  0.000000  -0.000000)
(0.000000  0.000000  -0.000000)
(0.000000  0.000000  -0.000000)
(0.000000  0.000000  -0.000000)
(0.000000  0.000000  -0.000000)
(0.000000  0.000000  -0.000000)
(0.000000  0.000000  -0.000000)
(0.000000  0.000000  -0.000000)
(0.000000  0.000000  -0.000000)
(0.000000  0.000000  -0.000000)
(0.000000  0.000000  -0.000000)
(0.000000  0.000000  -0.000000)
(0.000000  0.000000  -0.000000)
(0.000000  0.000000  -0.000000)
(0.000000  0.000000  -0.000000)
(0.000000  0.000000  -0.000000)
(0.000000  0.000000  -0.000000)
(0.000001  0.000000  -0.000000)
(0.000001  0.000000  -0.000000)
(0.000001  0.000000  -0.000000)
(0.000001  0.000000  -0.000000)
(0.000001  0.000000  -0.000000)
(0.000001  0.000000  -0.000000)
(0.000001  0.000000  -0.000000)
(0.000001  0.000000  -0.000000)
(0.000001  0.000000  -0.000000)
(0.000001  0.000000  -0.000000)
(0.000001  0.000000  -0.000000)
(0.000001  0.000000  -0.000000)
(0.000001  0.000000  -0.000000)
(0.000001  0.000000  -0.000000)
(0.000002  0.000000  -0.000000)
(0.000002  0.000000  -0.000000)
(0.000002  0.000000  -0.000000)
(0.000002  0.000000  -0.000000)
(0.000002  0.000000  -0.000000)
(0.000002  0.000000  -0.000000)
(0.000003  0.000000  -0.000000)
(0.000003  0.000000  -0.000000)
(0.000003  0.000000  -0.000000)
(0.000003  0.000000  -0.000000)
(0.000004  0.000000  -0.000000)
(0.000004  0.000000  -0.000000)
(0.000004  0.000000  -0.000000)
(0.000005  0.000000  -0.000000)
(0.000005  0.000000  -0.000000)
(0.000005  0.000000  -0.000000)
(0.000006  0.000000  -0.000000)
(0.000006  0.000000  -0.000000)
(0.000007  0.000000  -0.000000)
(0.000008  0.000000  -0.000000)
(0.000008  0.000000  -0.000000)
(0.000009  0.000000  -0.000000)
(0.000010  0.000000  -0.000000)
(0.000011  0.000000  -0.000000)
(0.000011  0.000000  -0.000001)
(0.000012  0.000000  -0.000001)
(0.000013  0.000000  -0.000001)
(0.000015  0.000000  -0.000001)
(0.000016  0.000000  -0.000001)
(0.000017  0.000000  -0.000001)
(0.000019  0.000000  -0.000001)
(0.000020  0.000000  -0.000001)
(0.000022  0.000000  -0.000001)
(0.000024  0.000000  -0.000001)
(0.000026  0.000000  -0.000001)
(0.000028  0.000000  -0.000001)
(0.000030  0.000000  -0.000001)
(0.000033  0.000000  -0.000002)
(0.000036  0.000000  -0.000002)
(0.000039  0.000000  -0.000002)
(0.000042  0.000000  -0.000002)
(0.000046  0.000000  -0.000002)
(0.000050  0.000000  -0.000002)
(0.000054  0.000000  -0.000002)
(0.000059  0.000000  -0.000003)
(0.000064  0.000000  -0.000003)
(0.000069  0.000000  -0.000003)
(0.000075  0.000000  -0.000003)
(0.000081  0.000000  -0.000004)
(0.000088  0.000000  -0.000004)
(0.000096  0.000000  -0.000004)
(0.000104  0.000000  -0.000005)
(0.000113  0.000000  -0.000005)
(0.000122  0.000000  -0.000006)
(0.000132  0.000000  -0.000006)
(0.000144  0.000000  -0.000007)
(0.000156  0.000000  -0.000007)
(0.000169  0.000000  -0.000008)
(0.000183  0.000000  -0.000008)
(0.000199  0.000000  -0.000009)
(0.000216  0.000000  -0.000010)
(0.000234  0.000000  -0.000011)
(0.000254  0.000000  -0.000012)
(0.000275  0.000000  -0.000013)
(0.000298  0.000000  -0.000014)
(0.000323  0.000000  -0.000015)
(0.000351  0.000000  -0.000016)
(0.000380  0.000000  -0.000017)
(0.000412  0.000000  -0.000019)
(0.000447  0.000000  -0.000020)
(0.000484  0.000000  -0.000022)
(0.000525  0.000000  -0.000024)
(0.000569  0.000000  -0.000026)
(0.000616  0.000000  -0.000028)
(0.000668  0.000000  -0.000030)
(0.000723  0.000000  -0.000033)
(0.000783  0.000000  -0.000035)
(0.000848  0.000000  -0.000038)
(0.000919  0.000000  -0.000041)
(0.000994  0.000000  -0.000044)
(0.001076  0.000000  -0.000048)
(0.001165  0.000000  -0.000052)
(0.001260  0.000000  -0.000056)
(0.001363  0.000000  -0.000060)
(0.001474  0.000000  -0.000065)
(0.001594  0.000000  -0.000070)
(0.001723  0.000000  -0.000075)
(0.001862  0.000000  -0.000081)
(0.002011  0.000000  -0.000087)
(0.002172  0.000000  -0.000094)
(0.002345  0.000000  -0.000101)
(0.002530  0.000000  -0.000108)
(0.002729  0.000000  -0.000116)
(0.002943  0.000000  -0.000124)
(0.003172  0.000000  -0.000133)
(0.003417  0.000000  -0.000143)
(0.003679  0.000000  -0.000152)
(0.003959  0.000000  -0.000163)
(0.004257  0.000000  -0.000174)
(0.004576  0.000000  -0.000185)
(0.004916  0.000000  -0.000197)
(0.005277  0.000000  -0.000210)
(0.005661  0.000000  -0.000223)
(0.006068  0.000000  -0.000236)
(0.006500  0.000000  -0.000250)
(0.006957  0.000000  -0.000264)
(0.007439  0.000000  -0.000279)
(0.007948  0.000000  -0.000294)
(0.008484  0.000000  -0.000309)
(0.009047  0.000000  -0.000324)
(0.009638  0.000000  -0.000340)
(0.010256  0.000000  -0.000356)
(0.010902  0.000000  -0.000371)
(0.011575  0.000000  -0.000386)
(0.012276  0.000000  -0.000401)
(0.013002  0.000000  -0.000416)
(0.013753  0.000000  -0.000430)
(0.014529  0.000000  -0.000443)
(0.015327  0.000000  -0.000455)
(0.016146  0.000000  -0.000466)
(0.016983  0.000000  -0.000476)
(0.017837  0.000000  -0.000484)
(0.018704  0.000000  -0.000491)
(0.019582  0.000000  -0.000496)
(0.020467  0.000000  -0.000499)
(0.021356  0.000000  -0.000500)
(0.022245  0.000000  -0.000499)
(0.023130  0.000000  -0.000495)
(0.024006  0.000000  -0.000489)
(0.024869  0.000000  -0.000481)
(0.025715  0.000000  -0.000470)
(0.026538  0.000000  -0.000456)
(0.027334  0.000000  -0.000439)
(0.028099  0.000000  -0.000420)
(0.028826  0.000000  -0.000398)
(0.029513  0.000000  -0.000373)
(0.030153  0.000000  -0.000346)
(0.030743  0.000000  -0.000317)
(0.031279  0.000000  -0.000285)
(0.031756  0.000000  -0.000251)
(0.032172  0.000000  -0.000216)
(0.032524  0.000000  -0.000179)
(0.032808  0.000000  -0.000141)
(0.033024  0.000000  -0.000101)
(0.033168  0.000000  -0.000061)
(0.033241  0.000000  -0.000020)
(0.033241  0.000000  0.000020)
(0.033168  0.000000  0.000061)
(0.033024  0.000000  0.000101)
(0.032808  0.000000  0.000141)
(0.032524  0.000000  0.000179)
(0.032172  0.000000  0.000216)
(0.031756  0.000000  0.000251)
(0.031279  0.000000  0.000285)
(0.030743  0.000000  0.000317)
(0.030153  0.000000  0.000346)
(0.029513  0.000000  0.000373)
(0.028826  0.000000  0.000398)
(0.028099  0.000000  0.000420)
(0.027334  0.000000  0.000439)
(0.026538  0.000000  0.000456)
(0.025715  0.000000  0.000470)
(0.024869  0.000000  0.000481)
(0.024006  0.000000  0.000489)
(0.023130  0.000000  0.000495)
(0.022245  0.000000  0.000499)
(0.021356  0.000000  0.000500)
(0.020467  0.000000  0.000499)
(0.019582  0.000000  0.000496)
(0.018704  0.000000  0.000491)
(0.017837  0.000000  0.000484)
(0.016983  0.000000  0.000476)
(0.016146  0.000000  0.000466)
(0.015327  0.000000  0.000455)
(0.014529  0.000000  0.000443)
(0.013753  0.000000  0.000430)
(0.013002  0.000000  0.000416)
(0.012276  0.000000  0.000401)
(0.011575  0.000000  0.000386)
(0.010902  0.000000  0.000371)
(0.010256  0.000000  0.000356)
(0.009638  0.000000  0.000340)
(0.009047  0.000000  0.000324)
(0.008484  0.000000  0.000309)
(0.007948  0.000000  0.000294)
(0.007439  0.000000  0.000279)
(0.006957  0.000000  0.000264)
(0.006500  0.000000  0.000250)
(0.006068  0.000000  0.000236)
(0.005661  0.000000  0.000223)
(0.005277  0.000000  0.000210)
(0.004916  0.000000  0.000197)
(0.004576  0.000000  0.000185)
(0.004257  0.000000  0.000174)
(0.003959  0.000000  0.000163)
(0.003679  0.000000  0.000152)
(0.003417  0.000000  0.000143)
(0.003172  0.000000  0.000133)
(0.002943  0.000000  0.000124)
(0.002729  0.000000  0.000116)
(0.002530  0.000000  0.000108)
(0.002345  0.000000  0.000101)
(0.002172  0.000000  0.000094)
(0.002011  0.000000  0.000087)
(0.001862  0.000000  0.000081)
(0.001723  0.000000  0.000075)
(0.001594  0.000000  0.000070)
(0.001474  0.000000  0.000065)
(0.001363  0.000000  0.000060)
(0.001260  0.000000  0.000056)
(0.001165  0.000000  0.000052)
(0.001076  0.000000  0.000048)
(0.000994  0.000000  0.000044)
(0.000919  0.000000  0.000041)
(0.000848  0.000000  0.000038)
(0.000783  0.000000  0.000035)
(0.000723  0.000000  0.000033)
(0.000668  0.000000  0.000030)
(0.000616  0.000000  0.000028)
(0.000569  0.000000  0.000026)
(0.000525  0.000000  0.000024)
(0.000484  0.000000  0.000022)
(0.000447  0.000000  0.000020)
(0.000412  0.000000  0.000019)
(0.000380  0.000000  0.000017)
(0.000351  0.000000  0.000016)
(0.000323  0.000000  0.000015)
(0.000298  0.000000  0.000014)
(0.000275  0.000000  0.000013)
(0.000254  0.000000  0.000012)
(0.000234  0.000000  0.000011)
(0.000216  0.000000  0.000010)
(0.000199  0.000000  0.000009)
(0.000183  0.000000  0.000008)
(0.000169  0.000000  0.000008)
(0.000156  0.000000  0.000007)
(0.000144  0.000000  0.000007)
(0.000132  0.000000  0.000006)
(0.000122  0.000000  0.000006)
(0.000113  0.000000  0.000005)
(0.000104  0.000000  0.000005)
(0.000096  0.000000  0.000004)
(0.000088  0.000000  0.000004)
(0.000081  0.000000  0.000004)
(0.000075  0.000000  0.000003)
(0.000069  0.000000  0.000003)
(0.000064  0.000000  0.000003)
(0.000059  0.000000  0.000003)
(0.000054  0.000000  0.000002)
(0.000050  0.000000  0.000002)
(0.000046  0.000000  0.000002)
(0.000042  0.000000  0.000002)
(0.000039  0.000000  0.000002)
(0.000036  0.000000  0.000002)
(0.000033  0.000000  0.000002)
(0.000030  0.000000  0.000001)
(0.000028  0.000000  0.000001)
(0.000026  0.000000  0.000001)
(0.000024  0.000000  0.000001)
(0.000022  0.000000  0.000001)
(0.000020  0.000000  0.000001)
(0.000019  0.000000  0.000001)
(0.000017  0.000000  0.000001)
(0.000016  0.000000  0.000001)
(0.000015  0.000000  0.000001)
(0.000013  0.000000  0.000001)
(0.000012  0.000000  0.000001)
(0.000011  0.000000  0.000001)
(0.000011  0.000000  0.000000)
(0.000010  0.000000  0.000000)
(0.000009  0.000000  0.000000)
(-0.000000  0.000000  0.000000)
(-0.000000  0.000000  -0.000000)
(-0.000000  0.000000  0.000000)
(-0.000000  0.000000  -0.000000)
(-0.000000  0.000000  0.000000)
(-0.000000  0.000000  -0.000000)
(-0.000000  0.000000  0.000000)
(-0.000000  0.000000  -0.000000)
(-0.000000  0.000000  0.000000)
(-0.000000  0.000000  -0.000000)
(-0.000000  0.000000  0.000000)
(-0.000000  0.000000  -0.000000)
(-0.000000  0.000000  0.000000)
(-0.000000  0.000000  -0.000000)
(-0.000000  0.000000  0.000000)
(-0.000000  0.000000  -0.000000)
(-0.000000  0.000000  0.000000)
(-0.000000  0.000000  -0.000000)
(-0.000000  0.000000  0.000000)
(-0.000000  0.000000  -0.000000)
(-0.000000  0.000000  0.000000)
(-0.000000  0.000000  -0.000000)
(-0.000000  0.000000  -0.000000)
(-0.000000  0.000000  -0.000000)
(-0.000000  0.000000  -0.000000)
(-0.000000  0.000000  0.000000)
(-0.000000  0.000000  0.000000)
(-0.000000  0.000000  -0.000000)
(-0.000000  0.000000  -0.000000)
(-0.000000  0.000000  0.000000)
(-0.000000  0.000000  0.000000)
(-0.000000  0.000000  -0.000000)
(-0.000000  0.000000  0.000000)
(-0.000000  0.000000  -0.000000)
(-0.000000  0.000000  -0.000000)
(-0.000000  0.000000  -0.000000)
(-0.000000  0.000000  0.000000)
(-0.000000  0.000000  -0.000000)
(-0.000000  0.000000  -0.000000)
(-0.000000  0.000000  0.000000)
(-0.000000  0.000000  0.000000)
(-0.000000  0.000000  -0.000000)
(-0.000000  0.000000  0.000000)
(-0.000000  0.000000  -0.000000)
(-0.000000  0.000000  0.000000)
(-0.000000  0.000000  0.000000)
(-0.000000  0.000000  -0.000000)
(-0.000000  0.000000  0.000000)
(-0.000000  0.000000  -0.000000)
(-0.000000  0.000000  0.000000)
(-0.000000  0.000000  0.000000)
(-0.000000  0.000000  -0.000000)
(-0.000000  0.000000  0.000000)
(-0.000000  0.000000  -0.000000)
(-0.000000  0.000000  -0.000000)
(0.000000  0.000000  0.000000)
(0.000000  0.000000  -0.000000)
(0.000000  0.000000  -0.000000)
(0.000000  0.000000  -0.000000)
(0.000000  0.000000  0.000000)
(0.000000  0.000000  -0.000000)
(0.000000  0.000000  -0.000000)
(0.000000  0.000000  0.000000)
(0.000000  0.000000  -0.000000)
(0.000000  0.000000  -0.000000)
(0.000000  0.000000  0.000000)
(0.000000  0.000000  0.000000)
(0.000000  0.000000  -0.000000)
(0.000000  0.000000  0.000000)
(0.000000  0.000000  -0.000000)
(0.000000  0.000000  0.000000)
(0.000000  0.000000  -0.000000)
(0.000000  0.000000  0.000000)
(0.000000  0.000000  0.000000)
(0.000000  0.000000  -0.000000)
(0.000000  0.000000  -0.000000)
(0.000000  0.000000  0.000000)
(0.000000  0.000000  -0.000000)
(0.000000  0.000000  -0.000000)
(0.000000  0.000000  0.000000)
(0.000000  0.000000  0.000000)
(0.000000  0.000000  -0.000000)
(0.000000  0.000000  0.000000)
(0.000000  0.000000  -0.000000)
(0.000000  0.000000  0.000000)
(0.000000  0.000000  0.000000)
(0.000000  0.000000  0.000000)
(0.000000  0.000000  -0.000000)
(0.000000  0.000000  0.000000)
(0.000000  0.000000  -0.000000)
(0.000000  0.000000  0.000000)
(0.000000  0.000000  -0.000000)
(0.000000  0.000000  0.000000)
(0.000000  0.000000  0.000000)
(0.000000  0.000000  -0.000000)
(0.000000  0.000000  0.000000)
(0.000000  0.000000  -0.000000)
(0.000000  0.000000  0.000000)
(0.000000  0.000000  -0.000000)
(0.000000  0.000000  0.000000)
(0.000000  0.000000  -0.000000)
(-0.000000  0.000000  -0.000000)
(0.000000  0.000000  -0.000000)
(0.000000  0.000000  0.000000)
(-0.000000  0.000000  -0.000000)
(-0.000000  0.000000  0.000000)
(-0.000000  0.000000  -0.000000)
(-0.000000  0.000000  0.000000)
(-0.000000  0.000000  -0.000000)
(-0.000000  0.000000  -0.000000)
(-0.000000  0.000000  0.000000)
(-0.000000  0.000000  0.000000)
(-0.000000  0.000000  -0.000000)
(-0.000000  0.000000  0.000000)
(-0.000000  0.000000  -0.000000)
(-0.000000  0.000000  0.000000)
(-0.000000  0.000000  -0.000000)
(-0.000000  0.000000  -0.000000)
(-0.000000  0.000000  0.000000)
(-0.000000  0.000000  -0.000000)
(-0.000000  0.000000  0.000000)
(-0.000000  0.000000  0.000000)
(-0.000000  0.000000  -0.000000)
(-0.000000  0.000000  -0.000000)
(-0.000000  0.000000  0.000000)
(-0.000000  0.000000  -0.000000)
(-0.000000  0.000000  0.000000)
(-0.000000  0.000000  -0.000000)
(-0.000000  0.000000  0.000000)
(-0.000000  0.000000  0.000000)
(-0.000000  0.000000  -0.000000)
(-0.000000  0.000000  -0.000000)
(-0.000000  0.000000  0.000000)
(-0.000000  0.000000  -0.000000)
(-0.000000  0.000000  0.000000)
(-0.000000  0.000000  -0.000000)
(-0.000000  0.000000  -0.000000)
(-0.000000  0.000000  0.000000)
(-0.000000  0.000000  -0.000000)
(-0.000000  0.000000  0.000000)
(-0.000000  0.000000  -0.000000)
(-0.000000  0.000000  -0.000000)
(-0.000000  0.000000  0.000000)
(-0.000000  0.000000  0.000000)
(-0.000000  0.000000  0.000000)
(-0.000000  0.000000  -0.000000)
(-0.000000  0.000000  0.000000)
(-0.000000  0.000000  -0.000000)
(-0.000000  0.000000  -0.000000)
(-0.000000  0.000000  0.000000)
(-0.000000  0.000000  -0.000000)
(-0.000000  0.000000  -0.000000)
(-0.000000  0.000000  0.000000)
(-0.000000  0.000000  -0.000000)
(-0.000000  0.000000  -0.000000)
(-0.000000  0.000000  0.000000)
(-0.000000  0.000000  -0.000000)
(-0.000000  0.000000  0.000000)
(-0.000000  0.000000  -0.000000)
(-0.000000  0.000000  0.000000)
(-0.000000  0.000000  -0.000000)
(-0.000000  0.000000  0.000000)
(-0.000000  0.000000  -0.000000)
(-0.000000  0.000000  -0.000000)
(-0.000000  0.000000  -0.000000)
(-0.000000  0.000000  -0.000000)
(-0.000000  0.000000  -0.000000)
(-0.000000  0.000000  -0.000000)
(-0.000000  0.000000  -0.000000)
(-0.000000  0.000000  0.000000)
(-0.000000  0.000000  -0.000000)
(-0.000000  0.000000  -0.000000)
(-0.000000  0.000000  -0.000000)
(-0.000000  0.000000  -0.000000)
(-0.000000  0.000000  -0.000000)
(-0.000000  0.000000  -0.000000)
(-0.000000  0.000000  -0.000000)
(-0.000000  0.000000  0.000000)
(-0.000000  0.000000  -0.000000)
(-0.000000  0.000000  0.000000)
(-0.000000  0.000000  -0.000000)
(-0.000000  0.000000  0.000000)
(-0.000000  0.000000  -0.000000)
(-0.000000  0.000000  -0.000000)
(-0.000000  0.000000  -0.000000)
(-0.000000  0.000000  -0.000000)
(-0.000000  0.000000  -0.000000)
(-0.000000  0.000000  -0.000000)
(-0.000000  0.000000  -0.000000)
(-0.000000  0.000000  -0.000000)
(-0.000000  0.000000  -0.000000)
(-0.000000  0.000000  -0.000000)
(-0.000000  0.000000  -0.000000)
(0.000000  0.000000  -0.000000)
(0.000000  0.000000  -0.000000)
(0.000000  0.000000  -0.000000)
(0.000000  0.000000  -0.000000)
(0.000000  0.000000  -0.000000)
(0.000000  0.000000  -0.000000)
(0.000000  0.000000  -0.000000)
(0.000000  0.000000  -0.000000)
(0.000000  0.000000  -0.000000)
(0.000000  0.000000  -0.000000)
(0.000000  0.000000  -0.000000)
(0.000000  0.000000  -0.000000)
(0.000000  0.000000  -0.000000)
(0.000000  0.000000  -0.000000)
(0.000000  0.000000  -0.000000)
(0.000000  0.000000  -0.000000)
(0.000000  0.000000  -0.000000)
(0.000000  0.000000  -0.000000)
(0.000000  0.000000  -0.000000)
(0.000000  0.000000  -0.000000)
(0.000000  0.000000  -0.000000)
(0.000000  0.000000  -0.000000)
(0.000000  0.000000  -0.000000)
(0.000000  0.000000  -0.000000)
(0.000000  0.000000  -0.000000)
(0.000000  0.000000  -0.000000)
(0.000000  0.000000  -0.000000)
(0.000000  0.000000  -0.000000)
(0.000000  0.000000  -0.000000)
(0.000000  0.000000  -0.000000)
(0.000000  0.000000  -0.000000)
(0.000000  0.000000  -0.000000)
(0.000000  0.000000  -0.000000)
(0.000000  0.000000  -0.000000)
(0.000000  0.000000  -0.000000)
(0.000000  0.000000  -0.000000)
(0.000000  0.000000  -0.000000)
(0.000000  0.000000  -0.000000)
(0.000000  0.000000  -0.000000)
(0.000000  0.000000  -0.000000)
(0.000000  0.000000  -0.000000)
(0.000000  0.000000  -0.000000)
(0.000000  0.000000  -0.000000)
(0.000000  0.000000  -0.000000)
(0.000000  0.000000  -0.000000)
(0.000000  0.000000  -0.000000)
(0.000000  0.000000  -0.000000)
(0.000000  0.000000  -0.000000)
(0.000000  0.000000  -0.000000)
(0.000000  0.000000  -0.000000)
(0.000000  0.000000  -0.000000)
(0.000000  0.000000  -0.000000)
(0.000000  0.000000  -0.000000)
(0.000000  0.000000  -0.000000)
(0.000000  0.000000  -0.000000)
(0.000000  0.000000  -0.000000)
(0.000000  0.000000  -0.000000)
(0.000000  0.000000  -0.000000)
(0.000000  0.000000  -0.000000)
(0.000000  0.000000  -0.000000)
(0.000000  0.000000  -0.000000)
(0.000000  0.000000  -0.000000)
(0.000000  0.000000  -0.000000)
(0.000000  0.000000  -0.000000)
(0.000000  0.000000  -0.000000)
(0.000000  0.000000  -0.000000)
(0.000000  0.000000  -0.000000)
(0.000000  0.000000  -0.000000)
(0.000000  0.000000  -0.000000)
(0.000000  0.000000  -0.000000)
(0.000000  0.000000  -0.000000)
(0.000000  0.000000  -0.000000)
(0.000000  0.000000  -0.000000)
(0.000000  0.000000  -0.000000)
(0.000000  0.000000  -0.000000)
(0.000000  0.000000  -0.000000)
(0.000000  0.000000  -0.000000)
(0.000000  0.000000  -0.000000)
(0.000000  0.000000  -0.000000)
(0.000000  0.000000  -0.000000)
(0.000000  0.000000  -0.000000)
(0.000000  0.000000  -0.000000)
(0.000000  0.000000  -0.000000)
(0.000000  0.000000  -0.000000)
(0.000000  0.000000  -0.000000)
(0.000000  0.000000  -0.000000)
(0.000000  0.000000  -0.000000)
(0.000000  0.000000  -0.000000)
(0.000000  0.000000  -0.000000)
(0.000000  0.000000  -0.000000)
(0.000000  0.000000  -0.000000)
(0.000000  0.000000  -0.000000)
(0.000000  0.000000  -0.000000)
(0.000000  0.000000  -0.000000)
(0.000000  0.000000  -0.000000)
(0.000000  0.000000  -0.000000)
(0.000000  0.000000  -0.000000)
(0.000000  0.000000  -0.000000)
(0.000000  0.000000  -0.000000)
(0.000000  0.000000  -0.000000)
(0.000000  0.000000  -0.000000)
(0.000000  0.000000  -0.000000)
(0.000000  0.000000  -0.000000)
(0.000000  0.000000  -0.000000)
(0.000000  0.000000  -0.000000)
(0.000000  0.000000  -0.000000)
(0.000000  0.000000  -0.000000)
(0.000000  0.000000  -0.000000)
(0.000000  0.000000  -0.000000)
(0.000000  0.000000  -0.000000)
(0.000000  0.000000  -0.000000)
(0.000000  0.000000  -0.000000)
(0.000000  0.000000  -0.000000)
(0.000000  0.000000  -0.000000)
(0.000000  0.000000  -0.000000)
(0.000000  0.000000  -0.000000)
(0.000000  0.000000  -0.000000)
(0.000000  0.000000  -0.000000)
(0.000000  0.000000  -0.000000)
(0.000000  0.000000  -0.000000)
(0.000000  0.000000  -0.000000)
(0.000000  0.000000  -0.000000)
(0.000000  0.000000  -0.000000)
(0.000000  0.000000  -0.000000)
(0.000000  0.000000  -0.000000)
(0.000000  0.000000  -0.000000)
(0.000000  0.000000  -0.000000)
(0.000000  0.000000  -0.000000)
(0.000000  0.000000  -0.000000)
(0.000000  0.000000  -0.000000)
(0.000000  0.000000  -0.000000)
(0.000000  0.000000  -0.000000)
(0.000000  0.000000  -0.000000)
(0.000000  0.000000  -0.000000)
(0.000000  0.000000  -0.000000)
(0.000000  0.000000  -0.000000)
(0.000000  0.000000  -0.000000)
(0.000000  0.000000  -0.000000)
(0.000000  0.000000  -0.000000)
(0.000000  0.000000  -0.000000)
(0.000000  0.000000  -0.000000)
(0.000000  0.000000  -0.000000)
(0.000000  0.000000  -0.000000)
(0.000000  0.000000  -0.000000)
(0.000000  0.000000  -0.000000)
(0.000000  0.000000  -0.000000)
(0.000000  0.000000  -0.000000)
(0.000000  0.000000  -0.000000)
(0.000000  0.000000  -0.000000)
(0.000000  0.000000  -0.000000)
(0.000000  0.000000  -0.000000)
(0.000000  0.000000  -0.000000)
(0.000000  0.000000  -0.000000)
(0.000000  0.000000  -0.000000)
(0.000000  0.000000  -0.000000)
(0.000000  0.000000  -0.000000)
(0.000000  0.000000  -0.000000)
(0.000000  0.000000  -0.000000)
(0.000000  0.000000  -0.000000)
(0.000000  0.000000  -0.000000)
(0.000000  0.000000  -0.000000)
(0.000000  0.000000  -0.000000)
(0.000000  0.000000  -0.000000)
(0.000000  0.000000  -0.000000)
(0.000000  0.000000  -0.000000)
(0.000000  0.000000  -0.000000)
(0.000000  0.000000  -0.000000)
(0.000000  0.000000  -0.000000)
(0.000000  0.000000  -0.000000)
(0.000000  0.000000  -0.000000)
(0.000000  0.000000  -0.000000)
(0.000000  0.000000  -0.000000)
(0.000000  0.000000  -0.000000)
(0.000000  0.000000  -0.000000)
(0.000000  0.000000  -0.000000)
(0.000000  0.000000  -0.000000)
(0.000000  0.000000  -0.000000)
(0.000000  0.000000  -0.000000)
(0.000000  0.000000  -0.000000)
(0.000000  0.000000  -0.000000)
(0.000000  0.000000  -0.000000)
(0.000000  0.000000  -0.000000)
(0.000000  0.000000  -0.000000)
(0.000000  0.000000  -0.000000)
(0.000000  0.000000  -0.000000)
(0.000000  0.000000  -0.000000)
(0.000000  0.000000  -0.000000)
(0.000000  0.000000  -0.000000)
(0.000000  0.000000  -0.000000)
(0.000000  0.000000  -0.000000)
(0.000000  0.000000  -0.000000)
(0.000000  0.000000  -0.000000)
(0.000000  0.000000  -0.000000)
(0.000000  0.000000  -0.000000)
(0.000000  0.000000  -0.000000)
(0.000000  0.000000  -0.000000)
(0.000000  0.000000  -0.000000)
(0.000000  0.000000  -0.000000)
(0.000000  0.000000  -0.000000)
(0.000000  0.000000  -0.000000)
(0.000000  0.000000  -0.000000)
(0.000000  0.000000  -0.000000)
(0.000000  0.000000  -0.000000)
(0.000000  0.000000  -0.000000)
(0.000000  0.000000  -0.000000)
(0.000000  0.000000  -0.000000)
(0.000000  0.000000  -0.000000)
(0.000000  0.000000  -0.000000)
(0.000000  0.000000  -0.000000)
(0.000000  0.000000  -0.000000)
(0.000000  0.000000  -0.000000)
(0.000000  0.000000  -0.000000)
(0.000000  0.000000  -0.000000)
(0.000000  0.000000  -0.000000)
(0.000000  0.000000  -0.000000)
(0.000000  0.000000  -0.000000)
(0.000000  0.000000  -0.000000)
(0.000000  0.000000  -0.000000)
(0.000000  0.000000  -0.000000)
(0.000000  0.000000  -0.000000)
(0.000000  0.000000  -0.000000)
(0.000000  0.000000  -0.000000)
(0.000000  0.000000  -0.000000)
(0.000000  0.000000  -0.000000)
(0.000000  0.000000  -0.000000)
(0.000000  0.000000  -0.000000)
(0.000000  0.000000  -0.000000)
(0.000000  0.000000  -0.000000)
(0.000000  0.000000  -0.000000)
(0.000000  0.000000  -0.000000)
(0.000000  0.000000  -0.000000)
(0.000000  0.000000  -0.000000)
(0.000000  0.000000  -0.000000)
(0.000000  0.000000  -0.000000)
(0.000000  0.000000  -0.000000)
(0.000000  0.000000  -0.000000)
(0.000000  0.000000  -0.000000)
(0.000000  0.000000  -0.000000)
(0.000000  0.000000  -0.000000)
(0.000000  0.000000  -0.000000)
(0.000000  0.000000  -0.000000)
(0.000000  0.000000  -0.000000)
(0.000000  0.000000  -0.000000)
(0.000000  0.000000  -0.000000)
(0.000000  0.000000  -0.000000)
(0.000000  0.000000  -0.000000)
(0.000000  0.000000  -0.000000)
(0.000000  0.000000  -0.000000)
(0.000000  0.000000  -0.000000)
(0.000000  0.000000  -0.000000)
(0.000000  0.000000  -0.000000)
(0.000000  0.000000  -0.000000)
(0.000000  0.000000  -0.000000)
(0.000000  0.000000  -0.000000)
(0.000000  0.000000  -0.000000)
(0.000000  0.000000  -0.000000)
(0.000000  0.000000  -0.000000)
(0.000000  0.000000  -0.000000)
(0.000000  0.000000  -0.000000)
(0.000000  0.000000  -0.000000)
(0.000000  0.000000  -0.000000)
(0.000000  0.000000  -0.000000)
(0.000000  0.000000  -0.000000)
(0.000000  0.000000  -0.000000)
(0.000000  0.000000  -0.000000)
(0.000000  0.000000  -0.000000)
(0.000000  0.000000  -0.000000)
(0.000000  0.000000  -0.000000)
(0.000000  0.000000  -0.000000)
(0.000000  0.000000  -0.000000)
(0.000000  0.000000  -0.000000)
(0.000000  0.000000  -0.000000)
(0.000001  0.000000  -0.000000)
(0.000001  0.000000  -0.000000)
(0.000001  0.000000  -0.000000)
(0.000001  0.000000  -0.000000)
(0.000001  0.000000  -0.000000)
(0.000001  0.000000  -0.000000)
(0.000001  0.000000  -0.000000)
(0.000001  0.000000  -0.000000)
(0.000001  0.000000  -0.000000)
(0.000001  0.000000  -0.000000)
(0.000001  0.000000  -0.000000)
(0.000001  0.000000  -0.000000)
(0.000001  0.000000  -0.000000)
(0.000001  0.000000  -0.000000)
(0.000002  0.000000  -0.000000)
(0.000002  0.000000  -0.000000)
(0.000002  0.000000  -0.000000)
(0.000002  0.000000  -0.000000)
(0.000002  0.000000  -0.000000)
(0.000002  0.000000  -0.000000)
(0.000003  0.000000  -0.000000)
(0.000003  0.000000  -0.000000)
(0.000003  0.000000  -0.000000)
(0.000003  0.000000  -0.000000)
(0.000004  0.000000  -0.000000)
(0.000004  0.000000  -0.000000)
(0.000004  0.000000  -0.000000)
(0.000005  0.000000  -0.000000)
(0.000005  0.000000  -0.000000)
(0.000005  0.000000  -0.000000)
(0.000006  0.000000  -0.000000)
(0.000006  0.000000  -0.000000)
(0.000007  0.000000  -0.000000)
(0.000008  0.000000  -0.000000)
(0.000008  0.000000  -0.000000)
(0.000009  0.000000  -0.000001)
(0.000010  0.000000  -0.000001)
(0.000011  0.000000  -0.000001)
(0.000011  0.000000  -0.000001)
(0.000012  0.000000  -0.000001)
(0.000013  0.000000  -0.000001)
(0.000015  0.000000  -0.000001)
(0.000016  0.000000  -0.000001)
(0.000017  0.000000  -0.000001)
(0.000019  0.000000  -0.000001)
(0.000020  0.000000  -0.000001)
(0.000022  0.000000  -0.000001)
(0.000024  0.000000  -0.000001)
(0.000026  0.000000  -0.000001)
(0.000028  0.000000  -0.000002)
(0.000030  0.000000  -0.000002)
(0.000033  0.000000  -0.000002)
(0.000036  0.000000  -0.000002)
(0.000039  0.000000  -0.000002)
(0.000042  0.000000  -0.000002)
(0.000046  0.000000  -0.000003)
(0.000050  0.000000  -0.000003)
(0.000054  0.000000  -0.000003)
(0.000059  0.000000  -0.000003)
(0.000064  0.000000  -0.000004)
(0.000069  0.000000  -0.000004)
(0.000075  0.000000  -0.000004)
(0.000081  0.000000  -0.000005)
(0.000088  0.000000  -0.000005)
(0.000096  0.000000  -0.000005)
(0.000104  0.000000  -0.000006)
(0.000112  0.000000  -0.000006)
(0.000122  0.000000  -0.000007)
(0.000132  0.000000  -0.000007)
(0.000144  0.000000  -0.000008)
(0.000156  0.000000  -0.000009)
(0.000169  0.000000  -0.000009)
(0.000183  0.000000  -0.000010)
(0.000199  0.000000  -0.000011)
(0.000216  0.000000  -0.000012)
(0.000234  0.000000  -0.000013)
(0.000254  0.000000  -0.000014)
(0.000275  0.000000  -0.000015)
(0.000298  0.000000  -0.000017)
(0.000323  0.000000  -0.000018)
(0.000351  0.000000  -0.000019)
(0.000380  0.000000  -0.000021)
(0.000412  0.000000  -0.000023)
(0.000447  0.000000  -0.000025)
(0.000484  0.000000  -0.000027)
(0.000525  0.000000  -0.000029)
(0.000568  0.000000  -0.000031)
(0.000616  0.000000  -0.000034)
(0.000667  0.000000  -0.000037)
(0.000723  0.000000  -0.000040)
(0.000783  0.000000  -0.000043)
(0.000848  0.000000  -0.000046)
(0.000918  0.000000  -0.000050)
(0.000994  0.000000  -0.000054)
(0.001076  0.000000  -0.000059)
(0.001164  0.000000  -0.000063)
(0.001260  0.000000  -0.000068)
(0.001363  0.000000  -0.000074)
(0.001474  0.000000  -0.000079)
(0.001593  0.000000  -0.000085)
(0.001722  0.000000  -0.000092)
(0.001861  0.000000  -0.000099)
(0.002010  0.000000  -0.000107)
(0.002171  0.000000  -0.000115)
(0.002344  0.000000  -0.000123)
(0.002529  0.000000  -0.000132)
(0.002728  0.000000  -0.000142)
(0.002942  0.000000  -0.000152)
(0.003170  0.000000  -0.000163)
(0.003415  0.000000  -0.000174)
(0.003677  0.000000  -0.000186)
(0.003957  0.000000  -0.000199)
(0.004256  0.000000  -0.000212)
(0.004575  0.000000  -0.000226)
(0.004914  0.000000  -0.000241)
(0.005275  0.000000  -0.000256)
(0.005659  0.000000  -0.000272)
(0.006066  0.000000  -0.000288)
(0.006498  0.000000  -0.000305)
(0.006955  0.000000  -0.000323)
(0.007437  0.000000  -0.000341)
(0.007946  0.000000  -0.000359)
(0.008482  0.000000  -0.000378)
(0.009045  0.000000  -0.000397)
(0.009636  0.000000  -0.000416)
(0.010254  0.000000  -0.000435)
(0.010900  0.000000  -0.000454)
(0.011573  0.000000  -0.000472)
(0.012273  0.000000  -0.000490)
(0.013000  0.000000  -0.000508)
(0.013751  0.000000  -0.000525)
(0.014527  0.000000  -0.000541)
(0.015325  0.000000  -0.000556)
(0.016144  0.000000  -0.000569)
(0.016982  0.000000  -0.000581)
(0.017836  0.000000  -0.000592)
(0.018703  0.000000  -0.000600)
(0.019581  0.000000  -0.000606)
(0.020467  0.000000  -0.000610)
(0.021356  0.000000  -0.000611)
(0.022245  0.000000  -0.000610)
(0.023130  0.000000  -0.000606)
(0.024007  0.000000  -0.000598)
(0.024871  0.000000  -0.000588)
(0.025717  0.000000  -0.000574)
(0.026540  0.000000  -0.000557)
(0.027337  0.000000  -0.000537)
(0.028102  0.000000  -0.000513)
(0.028830  0.000000  -0.000486)
(0.029516  0.000000  -0.000456)
(0.030157  0.000000  -0.000423)
(0.030747  0.000000  -0.000387)
(0.031283  0.000000  -0.000349)
(0.031761  0.000000  -0.000307)
(0.032177  0.000000  -0.000264)
(0.032529  0.000000  -0.000219)
(0.032814  0.000000  -0.000172)
(0.033029  0.000000  -0.000124)
(0.033174  0.000000  -0.000075)
(0.033246  0.000000  -0.000025)
(0.033246  0.000000  0.000025)
(0.033174  0.000000  0.000075)
(0.033029  0.000000  0.000124)
(0.032814  0.000000  0.000172)
(0.032529  0.000000  0.000219)
(0.032177  0.000000  0.000264)
(0.031761  0.000000  0.000307)
(0.031283  0.000000  0.000349)
(0.030747  0.000000  0.000387)
(0.030157  0.000000  0.000423)
(0.029516  0.000000  0.000456)
(0.028830  0.000000  0.000486)
(0.028102  0.000000  0.000513)
(0.027337  0.000000  0.000537)
(0.026540  0.000000  0.000557)
(0.025717  0.000000  0.000574)
(0.024871  0.000000  0.000588)
(0.024007  0.000000  0.000598)
(0.023130  0.000000  0.000606)
(0.022245  0.000000  0.000610)
(0.021356  0.000000  0.000611)
(0.020467  0.000000  0.000610)
(0.019581  0.000000  0.000606)
(0.018703  0.000000  0.000600)
(0.017836  0.000000  0.000592)
(0.016982  0.000000  0.000581)
(0.016144  0.000000  0.000569)
(0.015325  0.000000  0.000556)
(0.014527  0.000000  0.000541)
(0.013751  0.000000  0.000525)
(0.013000  0.000000  0.000508)
(0.012273  0.000000  0.000490)
(0.011573  0.000000  0.000472)
(0.010900  0.000000  0.000454)
(0.010254  0.000000  0.000435)
(0.009636  0.000000  0.000416)
(0.009045  0.000000  0.000397)
(0.008482  0.000000  0.000378)
(0.007946  0.000000  0.000359)
(0.007437  0.000000  0.000341)
(0.006955  0.000000  0.000323)
(0.006498  0.000000  0.000305)
(0.006066  0.000000  0.000288)
(0.005659  0.000000  0.000272)
(0.005275  0.000000  0.000256)
(0.004914  0.000000  0.000241)
(0.004575  0.000000  0.000226)
(0.004256  0.000000  0.000212)
(0.003957  0.000000  0.000199)
(0.003677  0.000000  0.000186)
(0.003415  0.000000  0.000174)
(0.003170  0.000000  0.000163)
(0.002942  0.000000  0.000152)
(0.002728  0.000000  0.000142)
(0.002529  0.000000  0.000132)
(0.002344  0.000000  0.000123)
(0.002171  0.000000  0.000115)
(0.002010  0.000000  0.000107)
(0.001861  0.000000  0.000099)
(0.001722  0.000000  0.000092)
(0.001593  0.000000  0.000085)
(0.001474  0.000000  0.000079)
(0.001363  0.000000  0.000074)
(0.001260  0.000000  0.000068)
(0.001164  0.000000  0.000063)
(0.001076  0.000000  0.000059)
(0.000994  0.000000  0.000054)
(0.000918  0.000000  0.000050)
(0.000848  0.000000  0.000046)
(0.000783  0.000000  0.000043)
(0.000723  0.000000  0.000040)
(0.000667  0.000000  0.000037)
(0.000616  0.000000  0.000034)
(0.000568  0.000000  0.000031)
(0.000525  0.000000  0.000029)
(0.000484  0.000000  0.000027)
(0.000447  0.000000  0.000025)
(0.000412  0.000000  0.000023)
(0.000380  0.000000  0.000021)
(0.000351  0.000000  0.000019)
(0.000323  0.000000  0.000018)
(0.000298  0.000000  0.000017)
(0.000275  0.000000  0.000015)
(0.000254  0.000000  0.000014)
(0.000234  0.000000  0.000013)
(0.000216  0.000000  0.000012)
(0.000199  0.000000  0.000011)
(0.000183  0.000000  0.000010)
(0.000169  0.000000  0.000009)
(0.000156  0.000000  0.000009)
(0.000144  0.000000  0.000008)
(0.000132  0.000000  0.000007)
(0.000122  0.000000  0.000007)
(0.000112  0.000000  0.000006)
(0.000104  0.000000  0.000006)
(0.000096  0.000000  0.000005)
(0.000088  0.000000  0.000005)
(0.000081  0.000000  0.000005)
(0.000075  0.000000  0.000004)
(0.000069  0.000000  0.000004)
(0.000064  0.000000  0.000004)
(0.000059  0.000000  0.000003)
(0.000054  0.000000  0.000003)
(0.000050  0.000000  0.000003)
(0.000046  0.000000  0.000003)
(0.000042  0.000000  0.000002)
(0.000039  0.000000  0.000002)
(0.000036  0.000000  0.000002)
(0.000033  0.000000  0.000002)
(0.000030  0.000000  0.000002)
(0.000028  0.000000  0.000002)
(0.000026  0.000000  0.000001)
(0.000024  0.000000  0.000001)
(0.000022  0.000000  0.000001)
(0.000020  0.000000  0.000001)
(0.000019  0.000000  0.000001)
(0.000017  0.000000  0.000001)
(0.000016  0.000000  0.000001)
(0.000015  0.000000  0.000001)
(0.000013  0.000000  0.000001)
(0.000012  0.000000  0.000001)
(0.000011  0.000000  0.000001)
(0.000011  0.000000  0.000001)
(0.000010  0.000000  0.000001)
(0.000009  0.000000  0.000001)
(0.000000  0.000000  0.000000)
(0.000000  0.000000  -0.000000)
(0.000000  0.000000  0.000000)
(0.000000  0.000000  -0.000000)
(0.000000  0.000000  0.000000)
(0.000000  0.000000  -0.000000)
(0.000000  0.000000  0.000000)
(0.000000  0.000000  -0.000000)
(0.000000  0.000000  0.000000)
(0.000000  0.000000  -0.000000)
(0.000000  0.000000  0.000000)
(0.000000  0.000000  -0.000000)
(0.000000  0.000000  0.000000)
(0.000000  0.000000  -0.000000)
(0.000000  0.000000  0.000000)
(0.000000  0.000000  -0.000000)
(0.000000  0.000000  -0.000000)
(0.000000  0.000000  0.000000)
(0.000000  0.000000  0.000000)
(0.000000  0.000000  -0.000000)
(0.000000  0.000000  0.000000)
(0.000000  0.000000  0.000000)
(0.000000  0.000000  -0.000000)
(0.000000  0.000000  -0.000000)
(0.000000  0.000000  0.000000)
(0.000000  0.000000  -0.000000)
(0.000000  0.000000  0.000000)
(0.000000  0.000000  -0.000000)
(0.000000  0.000000  0.000000)
(0.000000  0.000000  -0.000000)
(0.000000  0.000000  0.000000)
(0.000000  0.000000  -0.000000)
(0.000000  0.000000  -0.000000)
(0.000000  0.000000  0.000000)
(0.000000  0.000000  -0.000000)
(0.000000  0.000000  -0.000000)
(0.000000  0.000000  -0.000000)
(0.000000  0.000000  0.000000)
(0.000000  0.000000  -0.000000)
(0.000000  0.000000  0.000000)
(0.000000  0.000000  0.000000)
(0.000000  0.000000  -0.000000)
(0.000000  0.000000  0.000000)
(0.000000  0.000000  0.000000)
(0.000000  0.000000  -0.000000)
(0.000000  0.000000  -0.000000)
(0.000000  0.000000  0.000000)
(0.000000  0.000000  -0.000000)
(0.000000  0.000000  0.000000)
(0.000000  0.000000  -0.000000)
(0.000000  0.000000  0.000000)
(0.000000  0.000000  0.000000)
(0.000000  0.000000  -0.000000)
(0.000000  0.000000  0.000000)
(0.000000  0.000000  -0.000000)
(0.000000  0.000000  0.000000)
(0.000000  0.000000  -0.000000)
(0.000000  0.000000  0.000000)
(0.000000  0.000000  -0.000000)
(0.000000  0.000000  0.000000)
(0.000000  0.000000  -0.000000)
(0.000000  0.000000  0.000000)
(0.000000  0.000000  -0.000000)
(0.000000  0.000000  0.000000)
(0.000000  0.000000  -0.000000)
(0.000000  0.000000  -0.000000)
(0.000000  0.000000  0.000000)
(0.000000  0.000000  -0.000000)
(0.000000  0.000000  0.000000)
(0.000000  0.000000  -0.000000)
(0.000000  0.000000  0.000000)
(0.000000  0.000000  -0.000000)
(0.000000  0.000000  -0.000000)
(0.000000  0.000000  0.000000)
(0.000000  0.000000  -0.000000)
(0.000000  0.000000  0.000000)
(0.000000  0.000000  -0.000000)
(0.000000  0.000000  0.000000)
(0.000000  0.000000  -0.000000)
(0.000000  0.000000  -0.000000)
(0.000000  0.000000  0.000000)
(0.000000  0.000000  -0.000000)
(0.000000  0.000000  -0.000000)
(0.000000  0.000000  0.000000)
(0.000000  0.000000  0.000000)
(0.000000  0.000000  -0.000000)
(0.000000  0.000000  -0.000000)
(0.000000  0.000000  -0.000000)
(0.000000  0.000000  0.000000)
(0.000000  0.000000  0.000000)
(0.000000  0.000000  -0.000000)
(0.000000  0.000000  0.000000)
(0.000000  0.000000  -0.000000)
(0.000000  0.000000  0.000000)
(0.000000  0.000000  -0.000000)
(0.000000  0.000000  0.000000)
(0.000000  0.000000  -0.000000)
(0.000000  0.000000  0.000000)
(0.000000  0.000000  -0.000000)
(0.000000  0.000000  0.000000)
(0.000000  0.000000  -0.000000)
(0.000000  0.000000  0.000000)
(0.000000  0.000000  -0.000000)
(0.000000  0.000000  0.000000)
(0.000000  0.000000  0.000000)
(0.000000  0.000000  0.000000)
(0.000000  0.000000  0.000000)
(0.000000  0.000000  -0.000000)
(0.000000  0.000000  -0.000000)
(0.000000  0.000000  0.000000)
(0.000000  0.000000  -0.000000)
(0.000000  0.000000  0.000000)
(0.000000  0.000000  -0.000000)
(0.000000  0.000000  0.000000)
(0.000000  0.000000  -0.000000)
(0.000000  0.000000  0.000000)
(0.000000  0.000000  0.000000)
(0.000000  0.000000  -0.000000)
(0.000000  0.000000  0.000000)
(0.000000  0.000000  -0.000000)
(0.000000  0.000000  0.000000)
(0.000000  0.000000  0.000000)
(0.000000  0.000000  0.000000)
(0.000000  0.000000  -0.000000)
(0.000000  0.000000  -0.000000)
(0.000000  0.000000  -0.000000)
(0.000000  0.000000  0.000000)
(0.000000  0.000000  -0.000000)
(0.000000  0.000000  0.000000)
(0.000000  0.000000  -0.000000)
(0.000000  0.000000  -0.000000)
(0.000000  0.000000  0.000000)
(0.000000  0.000000  0.000000)
(0.000000  0.000000  -0.000000)
(0.000000  0.000000  0.000000)
(0.000000  0.000000  0.000000)
(0.000000  0.000000  -0.000000)
(0.000000  0.000000  -0.000000)
(0.000000  0.000000  0.000000)
(0.000000  0.000000  -0.000000)
(0.000000  0.000000  0.000000)
(0.000000  0.000000  -0.000000)
(0.000000  0.000000  0.000000)
(0.000000  0.000000  -0.000000)
(0.000000  0.000000  0.000000)
(0.000000  0.000000  -0.000000)
(0.000000  0.000000  0.000000)
(0.000000  0.000000  -0.000000)
(0.000000  0.000000  0.000000)
(0.000000  0.000000  -0.000000)
(0.000000  0.000000  -0.000000)
(0.000000  0.000000  0.000000)
(0.000000  0.000000  -0.000000)
(0.000000  0.000000  -0.000000)
(0.000000  0.000000  0.000000)
(0.000000  0.000000  0.000000)
(0.000000  0.000000  -0.000000)
(0.000000  0.000000  -0.000000)
(0.000000  0.000000  0.000000)
(0.000000  0.000000  -0.000000)
(0.000000  0.000000  -0.000000)
(0.000000  0.000000  -0.000000)
(0.000000  0.000000  0.000000)
(0.000000  0.000000  -0.000000)
(0.000000  0.000000  0.000000)
(0.000000  0.000000  -0.000000)
(0.000000  0.000000  -0.000000)
(0.000000  0.000000  0.000000)
(0.000000  0.000000  -0.000000)
(0.000000  0.000000  0.000000)
(0.000000  0.000000  -0.000000)
(0.000000  0.000000  0.000000)
(0.000000  0.000000  -0.000000)
(0.000000  0.000000  -0.000000)
(0.000000  0.000000  0.000000)
(0.000000  0.000000  -0.000000)
(0.000000  0.000000  -0.000000)
(0.000000  0.000000  -0.000000)
(0.000000  0.000000  0.000000)
(0.000000  0.000000  -0.000000)
(0.000000  0.000000  -0.000000)
(0.000000  0.000000  -0.000000)
(0.000000  0.000000  -0.000000)
(0.000000  0.000000  -0.000000)
(0.000000  0.000000  -0.000000)
(0.000000  0.000000  -0.000000)
(0.000000  0.000000  -0.000000)
(0.000000  0.000000  -0.000000)
(0.000000  0.000000  -0.000000)
(0.000000  0.000000  -0.000000)
(0.000000  0.000000  -0.000000)
(0.000000  0.000000  -0.000000)
(0.000000  0.000000  -0.000000)
(0.000000  0.000000  -0.000000)
(0.000000  0.000000  -0.000000)
(0.000000  0.000000  -0.000000)
(0.000000  0.000000  -0.000000)
(0.000000  0.000000  -0.000000)
(0.000000  0.000000  -0.000000)
(0.000000  0.000000  -0.000000)
(0.000000  0.000000  -0.000000)
(0.000000  0.000000  -0.000000)
(0.000000  0.000000  -0.000000)
(0.000000  0.000000  -0.000000)
(0.000000  0.000000  -0.000000)
(0.000000  0.000000  -0.000000)
(0.000000  0.000000  -0.000000)
(0.000000  0.000000  -0.000000)
(0.000000  0.000000  -0.000000)
(0.000000  0.000000  -0.000000)
(0.000000  0.000000  -0.000000)
(0.000000  0.000000  -0.000000)
(0.000000  0.000000  -0.000000)
(0.000000  0.000000  -0.000000)
(0.000000  0.000000  -0.000000)
(0.000000  0.000000  -0.000000)
(0.000000  0.000000  -0.000000)
(0.000000  0.000000  -0.000000)
(0.000000  0.000000  -0.000000)
(0.000000  0.000000  -0.000000)
(0.000000  0.000000  -0.000000)
(0.000000  0.000000  -0.000000)
(0.000000  0.000000  -0.000000)
(0.000000  0.000000  -0.000000)
(0.000000  0.000000  -0.000000)
(0.000000  0.000000  -0.000000)
(0.000000  0.000000  -0.000000)
(0.000000  0.000000  -0.000000)
(0.000000  0.000000  -0.000000)
(0.000000  0.000000  -0.000000)
(0.000000  0.000000  -0.000000)
(0.000000  0.000000  -0.000000)
(0.000000  0.000000  -0.000000)
(0.000000  0.000000  -0.000000)
(0.000000  0.000000  -0.000000)
(0.000000  0.000000  -0.000000)
(0.000000  0.000000  -0.000000)
(0.000000  0.000000  -0.000000)
(0.000000  0.000000  -0.000000)
(0.000000  0.000000  -0.000000)
(0.000000  0.000000  -0.000000)
(0.000000  0.000000  -0.000000)
(0.000000  0.000000  -0.000000)
(0.000000  0.000000  -0.000000)
(0.000000  0.000000  -0.000000)
(0.000000  0.000000  -0.000000)
(0.000000  0.000000  -0.000000)
(0.000000  0.000000  -0.000000)
(0.000000  0.000000  -0.000000)
(0.000000  0.000000  -0.000000)
(0.000000  0.000000  -0.000000)
(0.000000  0.000000  -0.000000)
(0.000000  0.000000  -0.000000)
(0.000000  0.000000  -0.000000)
(0.000000  0.000000  -0.000000)
(0.000000  0.000000  -0.000000)
(0.000000  0.000000  -0.000000)
(0.000000  0.000000  -0.000000)
(0.000000  0.000000  -0.000000)
(0.000000  0.000000  -0.000000)
(0.000000  0.000000  -0.000000)
(0.000000  0.000000  -0.000000)
(0.000000  0.000000  -0.000000)
(0.000000  0.000000  -0.000000)
(0.000000  0.000000  -0.000000)
(0.000000  0.000000  -0.000000)
(0.000000  0.000000  -0.000000)
(0.000000  0.000000  -0.000000)
(0.000000  0.000000  -0.000000)
(0.000000  0.000000  -0.000000)
(0.000000  0.000000  -0.000000)
(0.000000  0.000000  -0.000000)
(0.000000  0.000000  -0.000000)
(0.000000  0.000000  -0.000000)
(0.000000  0.000000  -0.000000)
(0.000000  0.000000  -0.000000)
(0.000000  0.000000  -0.000000)
(0.000000  0.000000  -0.000000)
(0.000000  0.000000  -0.000000)
(0.000000  0.000000  -0.000000)
(0.000000  0.000000  -0.000000)
(0.000000  0.000000  -0.000000)
(0.000000  0.000000  -0.000000)
(0.000000  0.000000  -0.000000)
(0.000000  0.000000  -0.000000)
(0.000000  0.000000  -0.000000)
(0.000000  0.000000  -0.000000)
(0.000000  0.000000  -0.000000)
(0.000000  0.000000  -0.000000)
(0.000000  0.000000  -0.000000)
(0.000000  0.000000  -0.000000)
(0.000000  0.000000  -0.000000)
(0.000000  0.000000  -0.000000)
(0.000000  0.000000  -0.000000)
(0.000000  0.000000  -0.000000)
(0.000000  0.000000  -0.000000)
(0.000000  0.000000  -0.000000)
(0.000000  0.000000  -0.000000)
(0.000000  0.000000  -0.000000)
(0.000000  0.000000  -0.000000)
(0.000000  0.000000  -0.000000)
(0.000000  0.000000  -0.000000)
(0.000000  0.000000  -0.000000)
(0.000000  0.000000  -0.000000)
(0.000000  0.000000  -0.000000)
(0.000000  0.000000  -0.000000)
(0.000000  0.000000  -0.000000)
(0.000000  0.000000  -0.000000)
(0.000000  0.000000  -0.000000)
(0.000000  0.000000  -0.000000)
(0.000000  0.000000  -0.000000)
(0.000000  0.000000  -0.000000)
(0.000000  0.000000  -0.000000)
(0.000000  0.000000  -0.000000)
(0.000000  0.000000  -0.000000)
(0.000000  0.000000  -0.000000)
(0.000000  0.000000  -0.000000)
(0.000000  0.000000  -0.000000)
(0.000000  0.000000  -0.000000)
(0.000000  0.000000  -0.000000)
(0.000000  0.000000  -0.000000)
(0.000000  0.000000  -0.000000)
(0.000000  0.000000  -0.000000)
(0.000000  0.000000  -0.000000)
(0.000000  0.000000  -0.000000)
(0.000000  0.000000  -0.000000)
(0.000000  0.000000  -0.000000)
(0.000000  0.000000  -0.000000)
(0.000000  0.000000  -0.000000)
(0.000000  0.000000  -0.000000)
(0.000000  0.000000  -0.000000)
(0.000000  0.000000  -0.000000)
(0.000000  0.000000  -0.000000)
(0.000000  0.000000  -0.000000)
(0.000000  0.000000  -0.000000)
(0.000000  0.000000  -0.000000)
(0.000000  0.000000  -0.000000)
(0.000000  0.000000  -0.000000)
(0.000000  0.000000  -0.000000)
(0.000000  0.000000  -0.000000)
(0.000000  0.000000  -0.000000)
(0.000000  0.000000  -0.000000)
(0.000000  0.000000  -0.000000)
(0.000000  0.000000  -0.000000)
(0.000000  0.000000  -0.000000)
(0.000000  0.000000  -0.000000)
(0.000000  0.000000  -0.000000)
(0.000000  0.000000  -0.000000)
(0.000000  0.000000  -0.000000)
(0.000000  0.000000  -0.000000)
(0.000000  0.000000  -0.000000)
(0.000000  0.000000  -0.000000)
(0.000000  0.000000  -0.000000)
(0.000000  0.000000  -0.000000)
(0.000000  0.000000  -0.000000)
(0.000000  0.000000  -0.000000)
(0.000000  0.000000  -0.000000)
(0.000000  0.000000  -0.000000)
(0.000000  0.000000  -0.000000)
(0.000000  0.000000  -0.000000)
(0.000000  0.000000  -0.000000)
(0.000000  0.000000  -0.000000)
(0.000000  0.000000  -0.000000)
(0.000000  0.000000  -0.000000)
(0.000000  0.000000  -0.000000)
(0.000000  0.000000  -0.000000)
(0.000000  0.000000  -0.000000)
(0.000000  0.000000  -0.000000)
(0.000000  0.000000  -0.000000)
(0.000000  0.000000  -0.000000)
(0.000000  0.000000  -0.000000)
(0.000000  0.000000  -0.000000)
(0.000000  0.000000  -0.000000)
(0.000000  0.000000  -0.000000)
(0.000000  0.000000  -0.000000)
(0.000000  0.000000  -0.000000)
(0.000000  0.000000  -0.000000)
(0.000000  0.000000  -0.000000)
(0.000000  0.000000  -0.000000)
(0.000000  0.000000  -0.000000)
(0.000000  0.000000  -0.000000)
(0.000000  0.000000  -0.000000)
(0.000000  0.000000  -0.000000)
(0.000000  0.000000  -0.000000)
(0.000000  0.000000  -0.000000)
(0.000000  0.000000  -0.000000)
(0.000000  0.000000  -0.000000)
(0.000000  0.000000  -0.000000)
(0.000000  0.000000  -0.000000)
(0.000000  0.000000  -0.000000)
(0.000000  0.000000  -0.000000)
(0.000000  0.000000  -0.000000)
(0.000000  0.000000  -0.000000)
(0.000000  0.000000  -0.000000)
(0.000000  0.000000  -0.000000)
(0.000000  0.000000  -0.000000)
(0.000000  0.000000  -0.000000)
(0.000000  0.000000  -0.000000)
(0.000000  0.000000  -0.000000)
(0.000000  0.000000  -0.000000)
(0.000000  0.000000  -0.000000)
(0.000000  0.000000  -0.000000)
(0.000000  0.000000  -0.000000)
(0.000000  0.000000  -0.000000)
(0.000000  0.000000  -0.000000)
(0.000000  0.000000  -0.000000)
(0.000000  0.000000  -0.000000)
(0.000000  0.000000  -0.000000)
(0.000000  0.000000  -0.000000)
(0.000000  0.000000  -0.000000)
(0.000000  0.000000  -0.000000)
(0.000000  0.000000  -0.000000)
(0.000000  0.000000  -0.000000)
(0.000000  0.000000  -0.000000)
(0.000000  0.000000  -0.000000)
(0.000000  0.000000  -0.000000)
(0.000000  0.000000  -0.000000)
(0.000000  0.000000  -0.000000)
(0.000000  0.000000  -0.000000)
(0.000000  0.000000  -0.000000)
(0.000000  0.000000  -0.000000)
(0.000000  0.000000  -0.000000)
(0.000000  0.000000  -0.000000)
(0.000000  0.000000  -0.000000)
(0.000000  0.000000  -0.000000)
(0.000000  0.000000  -0.000000)
(0.000000  0.000000  -0.000000)
(0.000000  0.000000  -0.000000)
(0.000000  0.000000  -0.000000)
(0.000000  0.000000  -0.000000)
(0.000000  0.000000  -0.000000)
(0.000000  0.000000  -0.000000)
(0.000000  0.000000  -0.000000)
(0.000000  0.000000  -0.000000)
(0.000000  0.000000  -0.000000)
(0.000000  0.000000  -0.000000)
(0.000000  0.000000  -0.000000)
(0.000000  0.000000  -0.000000)
(0.000000  0.000000  -0.000000)
(0.000000  0.000000  -0.000000)
(0.000000  0.000000  -0.000000)
(0.000000  0.000000  -0.000000)
(0.000000  0.000000  -0.000000)
(0.000000  0.000000  -0.000000)
(0.000000  0.000000  -0.000000)
(0.000000  0.000000  -0.000000)
(0.000000  0.000000  -0.000000)
(0.000000  0.000000  -0.000000)
(0.000000  0.000000  -0.000000)
(0.000000  0.000000  -0.000000)
(0.000000  0.000000  -0.000000)
(0.000000  0.000000  -0.000000)
(0.000000  0.000000  -0.000000)
(0.000000  0.000000  -0.000000)
(0.000000  0.000000  -0.000000)
(0.000000  0.000000  -0.000000)
(0.000000  0.000000  -0.000000)
(0.000000  0.000000  -0.000000)
(0.000000  0.000000  -0.000000)
(0.000000  0.000000  -0.000000)
(0.000000  0.000000  -0.000000)
(0.000000  0.000000  -0.000000)
(0.000000  0.000000  -0.000000)
(0.000000  0.000000  -0.000000)
(0.000000  0.000000  -0.000000)
(0.000001  0.000000  -0.000000)
(0.000001  0.000000  -0.000000)
(0.000001  0.000000  -0.000000)
(0.000001  0.000000  -0.000000)
(0.000001  0.000000  -0.000000)
(0.000001  0.000000  -0.000000)
(0.000001  0.000000  -0.000000)
(0.000001  0.000000  -0.000000)
(0.000001  0.000000  -0.000000)
(0.000001  0.000000  -0.000000)
(0.000001  0.000000  -0.000000)
(0.000001  0.000000  -0.000000)
(0.000001  0.000000  -0.000000)
(0.000001  0.000000  -0.000000)
(0.000002  0.000000  -0.000000)
(0.000002  0.000000  -0.000000)
(0.000002  0.000000  -0.000000)
(0.000002  0.000000  -0.000000)
(0.000002  0.000000  -0.000000)
(0.000002  0.000000  -0.000000)
(0.000003  0.000000  -0.000000)
(0.000003  0.000000  -0.000000)
(0.000003  0.000000  -0.000000)
(0.000003  0.000000  -0.000000)
(0.000004  0.000000  -0.000000)
(0.000004  0.000000  -0.000000)
(0.000004  0.000000  -0.000000)
(0.000005  0.000000  -0.000000)
(0.000005  0.000000  -0.000000)
(0.000005  0.000000  -0.000000)
(0.000006  0.000000  -0.000000)
(0.000006  0.000000  -0.000000)
(0.000007  0.000000  -0.000000)
(0.000008  0.000000  -0.000001)
(0.000008  0.000000  -0.000001)
(0.000009  0.000000  -0.000001)
(0.000010  0.000000  -0.000001)
(0.000011  0.000000  -0.000001)
(0.000011  0.000000  -0.000001)
(0.000012  0.000000  -0.000001)
(0.000013  0.000000  -0.000001)
(0.000015  0.000000  -0.000001)
(0.000016  0.000000  -0.000001)
(0.000017  0.000000  -0.000001)
(0.000019  0.000000  -0.000001)
(0.000020  0.000000  -0.000001)
(0.000022  0.000000  -0.000001)
(0.000024  0.000000  -0.000002)
(0.000026  0.000000  -0.000002)
(0.000028  0.000000  -0.000002)
(0.000030  0.000000  -0.000002)
(0.000033  0.000000  -0.000002)
(0.000036  0.000000  -0.000002)
(0.000039  0.000000  -0.000003)
(0.000042  0.000000  -0.000003)
(0.000046  0.000000  -0.000003)
(0.000050  0.000000  -0.000003)
(0.000054  0.000000  -0.000004)
(0.000059  0.000000  -0.000004)
(0.000064  0.000000  -0.000004)
(0.000069  0.000000  -0.000005)
(0.000075  0.000000  -0.000005)
(0.000081  0.000000  -0.000005)
(0.000088  0.000000  -0.000006)
(0.000095  0.000000  -0.000006)
(0.000104  0.000000  -0.000007)
(0.000112  0.000000  -0.000007)
(0.000122  0.000000  -0.000008)
(0.000132  0.000000  -0.000009)
(0.000143  0.000000  -0.000010)
(0.000156  0.000000  -0.000010)
(0.000169  0.000000  -0.000011)
(0.000183  0.000000  -0.000012)
(0.000199  0.000000  -0.000013)
(0.000215  0.000000  -0.000014)
(0.000234  0.000000  -0.000015)
(0.000253  0.000000  -0.000017)
(0.000275  0.000000  -0.000018)
(0.000298  0.000000  -0.000020)
(0.000323  0.000000  -0.000021)
(0.000350  0.000000  -0.000023)
(0.000380  0.000000  -0.000025)
(0.000412  0.000000  -0.000027)
(0.000446  0.000000  -0.000029)
(0.000484  0.000000  -0.000032)
(0.000524  0.000000  -0.000034)
(0.000568  0.000000  -0.000037)
(0.000616  0.000000  -0.000040)
(0.000667  0.000000  -0.000043)
(0.000722  0.000000  -0.000047)
(0.000783  0.000000  -0.000051)
(0.000847  0.000000  -0.000055)
(0.000918  0.000000  -0.000059)
(0.000993  0.000000  -0.000064)
(0.001075  0.000000  -0.000069)
(0.001164  0.000000  -0.000075)
(0.001259  0.000000  -0.000081)
(0.001362  0.000000  -0.000087)
(0.001473  0.000000  -0.000094)
(0.001593  0.000000  -0.000101)
(0.001721  0.000000  -0.000109)
(0.001860  0.000000  -0.000117)
(0.002009  0.000000  -0.000126)
(0.002170  0.000000  -0.000135)
(0.002343  0.000000  -0.000145)
(0.002528  0.000000  -0.000156)
(0.002727  0.000000  -0.000168)
(0.002940  0.000000  -0.000180)
(0.003169  0.000000  -0.000192)
(0.003414  0.000000  -0.000206)
(0.003675  0.000000  -0.000220)
(0.003955  0.000000  -0.000235)
(0.004254  0.000000  -0.000251)
(0.004573  0.000000  -0.000267)
(0.004912  0.000000  -0.000285)
(0.005273  0.000000  -0.000303)
(0.005657  0.000000  -0.000321)
(0.006064  0.000000  -0.000341)
(0.006496  0.000000  -0.000361)
(0.006952  0.000000  -0.000382)
(0.007435  0.000000  -0.000403)
(0.007944  0.000000  -0.000424)
(0.008479  0.000000  -0.000446)
(0.009042  0.000000  -0.000469)
(0.009633  0.000000  -0.000491)
(0.010251  0.000000  -0.000514)
(0.010897  0.000000  -0.000536)
(0.011571  0.000000  -0.000558)
(0.012271  0.000000  -0.000580)
(0.012997  0.000000  -0.000600)
(0.013749  0.000000  -0.000621)
(0.014525  0.000000  -0.000639)
(0.015323  0.000000  -0.000657)
(0.016143  0.000000  -0.000673)
(0.016980  0.000000  -0.000687)
(0.017835  0.000000  -0.000699)
(0.018702  0.000000  -0.000709)
(0.019581  0.000000  -0.000717)
(0.020467  0.000000  -0.000721)
(0.021356  0.000000  -0.000723)
(0.022246  0.000000  -0.000721)
(0.023131  0.000000  -0.000716)
(0.024008  0.000000  -0.000707)
(0.024872  0.000000  -0.000695)
(0.025719  0.000000  -0.000679)
(0.026543  0.000000  -0.000658)
(0.027340  0.000000  -0.000634)
(0.028105  0.000000  -0.000607)
(0.028833  0.000000  -0.000575)
(0.029520  0.000000  -0.000539)
(0.030162  0.000000  -0.000500)
(0.030752  0.000000  -0.000458)
(0.031289  0.000000  -0.000412)
(0.031767  0.000000  -0.000363)
(0.032184  0.000000  -0.000312)
(0.032536  0.000000  -0.000259)
(0.032820  0.000000  -0.000203)
(0.033036  0.000000  -0.000146)
(0.033180  0.000000  -0.000088)
(0.033253  0.000000  -0.000029)
(0.033253  0.000000  0.000029)
(0.033180  0.000000  0.000088)
(0.033036  0.000000  0.000146)
(0.032820  0.000000  0.000203)
(0.032536  0.000000  0.000259)
(0.032184  0.000000  0.000312)
(0.031767  0.000000  0.000363)
(0.031289  0.000000  0.000412)
(0.030752  0.000000  0.000458)
(0.030162  0.000000  0.000500)
(0.029520  0.000000  0.000539)
(0.028833  0.000000  0.000575)
(0.028105  0.000000  0.000607)
(0.027340  0.000000  0.000634)
(0.026543  0.000000  0.000658)
(0.025719  0.000000  0.000679)
(0.024872  0.000000  0.000695)
(0.024008  0.000000  0.000707)
(0.023131  0.000000  0.000716)
(0.022246  0.000000  0.000721)
(0.021356  0.000000  0.000723)
(0.020467  0.000000  0.000721)
(0.019581  0.000000  0.000717)
(0.018702  0.000000  0.000709)
(0.017835  0.000000  0.000699)
(0.016980  0.000000  0.000687)
(0.016143  0.000000  0.000673)
(0.015323  0.000000  0.000657)
(0.014525  0.000000  0.000639)
(0.013749  0.000000  0.000621)
(0.012997  0.000000  0.000600)
(0.012271  0.000000  0.000580)
(0.011571  0.000000  0.000558)
(0.010897  0.000000  0.000536)
(0.010251  0.000000  0.000514)
(0.009633  0.000000  0.000491)
(0.009042  0.000000  0.000469)
(0.008479  0.000000  0.000446)
(0.007944  0.000000  0.000424)
(0.007435  0.000000  0.000403)
(0.006952  0.000000  0.000382)
(0.006496  0.000000  0.000361)
(0.006064  0.000000  0.000341)
(0.005657  0.000000  0.000321)
(0.005273  0.000000  0.000303)
(0.004912  0.000000  0.000285)
(0.004573  0.000000  0.000267)
(0.004254  0.000000  0.000251)
(0.003955  0.000000  0.000235)
(0.003675  0.000000  0.000220)
(0.003414  0.000000  0.000206)
(0.003169  0.000000  0.000192)
(0.002940  0.000000  0.000180)
(0.002727  0.000000  0.000168)
(0.002528  0.000000  0.000156)
(0.002343  0.000000  0.000145)
(0.002170  0.000000  0.000135)
(0.002009  0.000000  0.000126)
(0.001860  0.000000  0.000117)
(0.001721  0.000000  0.000109)
(0.001593  0.000000  0.000101)
(0.001473  0.000000  0.000094)
(0.001362  0.000000  0.000087)
(0.001259  0.000000  0.000081)
(0.001164  0.000000  0.000075)
(0.001075  0.000000  0.000069)
(0.000993  0.000000  0.000064)
(0.000918  0.000000  0.000059)
(0.000847  0.000000  0.000055)
(0.000783  0.000000  0.000051)
(0.000722  0.000000  0.000047)
(0.000667  0.000000  0.000043)
(0.000616  0.000000  0.000040)
(0.000568  0.000000  0.000037)
(0.000524  0.000000  0.000034)
(0.000484  0.000000  0.000032)
(0.000446  0.000000  0.000029)
(0.000412  0.000000  0.000027)
(0.000380  0.000000  0.000025)
(0.000350  0.000000  0.000023)
(0.000323  0.000000  0.000021)
(0.000298  0.000000  0.000020)
(0.000275  0.000000  0.000018)
(0.000253  0.000000  0.000017)
(0.000234  0.000000  0.000015)
(0.000215  0.000000  0.000014)
(0.000199  0.000000  0.000013)
(0.000183  0.000000  0.000012)
(0.000169  0.000000  0.000011)
(0.000156  0.000000  0.000010)
(0.000143  0.000000  0.000010)
(0.000132  0.000000  0.000009)
(0.000122  0.000000  0.000008)
(0.000112  0.000000  0.000007)
(0.000104  0.000000  0.000007)
(0.000095  0.000000  0.000006)
(0.000088  0.000000  0.000006)
(0.000081  0.000000  0.000005)
(0.000075  0.000000  0.000005)
(0.000069  0.000000  0.000005)
(0.000064  0.000000  0.000004)
(0.000059  0.000000  0.000004)
(0.000054  0.000000  0.000004)
(0.000050  0.000000  0.000003)
(0.000046  0.000000  0.000003)
(0.000042  0.000000  0.000003)
(0.000039  0.000000  0.000003)
(0.000036  0.000000  0.000002)
(0.000033  0.000000  0.000002)
(0.000030  0.000000  0.000002)
(0.000028  0.000000  0.000002)
(0.000026  0.000000  0.000002)
(0.000024  0.000000  0.000002)
(0.000022  0.000000  0.000001)
(0.000020  0.000000  0.000001)
(0.000019  0.000000  0.000001)
(0.000017  0.000000  0.000001)
(0.000016  0.000000  0.000001)
(0.000015  0.000000  0.000001)
(0.000013  0.000000  0.000001)
(0.000012  0.000000  0.000001)
(0.000011  0.000000  0.000001)
(0.000011  0.000000  0.000001)
(0.000010  0.000000  0.000001)
(0.000009  0.000000  0.000001)
(-0.000000  0.000000  0.000000)
(-0.000000  0.000000  -0.000000)
(-0.000000  0.000000  0.000000)
(-0.000000  0.000000  -0.000000)
(-0.000000  0.000000  0.000000)
(-0.000000  0.000000  -0.000000)
(-0.000000  0.000000  0.000000)
(-0.000000  0.000000  -0.000000)
(-0.000000  0.000000  0.000000)
(-0.000000  0.000000  -0.000000)
(-0.000000  0.000000  0.000000)
(-0.000000  0.000000  -0.000000)
(-0.000000  0.000000  0.000000)
(-0.000000  0.000000  -0.000000)
(-0.000000  0.000000  0.000000)
(-0.000000  0.000000  -0.000000)
(-0.000000  0.000000  -0.000000)
(-0.000000  0.000000  -0.000000)
(-0.000000  0.000000  -0.000000)
(-0.000000  0.000000  -0.000000)
(-0.000000  0.000000  0.000000)
(-0.000000  0.000000  -0.000000)
(-0.000000  0.000000  0.000000)
(-0.000000  0.000000  -0.000000)
(-0.000000  0.000000  0.000000)
(-0.000000  0.000000  -0.000000)
(-0.000000  0.000000  0.000000)
(-0.000000  0.000000  -0.000000)
(-0.000000  0.000000  0.000000)
(-0.000000  0.000000  0.000000)
(-0.000000  0.000000  0.000000)
(-0.000000  0.000000  -0.000000)
(-0.000000  0.000000  0.000000)
(-0.000000  0.000000  -0.000000)
(-0.000000  0.000000  -0.000000)
(-0.000000  0.000000  0.000000)
(-0.000000  0.000000  -0.000000)
(-0.000000  0.000000  -0.000000)
(-0.000000  0.000000  -0.000000)
(-0.000000  0.000000  -0.000000)
(-0.000000  0.000000  0.000000)
(-0.000000  0.000000  -0.000000)
(-0.000000  0.000000  0.000000)
(-0.000000  0.000000  -0.000000)
(-0.000000  0.000000  0.000000)
(-0.000000  0.000000  -0.000000)
(-0.000000  0.000000  -0.000000)
(-0.000000  0.000000  0.000000)
(-0.000000  0.000000  -0.000000)
(-0.000000  0.000000  0.000000)
(-0.000000  0.000000  -0.000000)
(-0.000000  0.000000  0.000000)
(-0.000000  0.000000  -0.000000)
(-0.000000  0.000000  0.000000)
(-0.000000  0.000000  -0.000000)
(-0.000000  0.000000  0.000000)
(-0.000000  0.000000  -0.000000)
(-0.000000  0.000000  -0.000000)
(0.000000  0.000000  -0.000000)
(0.000000  0.000000  0.000000)
(-0.000000  0.000000  0.000000)
(-0.000000  0.000000  -0.000000)
(-0.000000  0.000000  0.000000)
(-0.000000  0.000000  -0.000000)
(-0.000000  0.000000  0.000000)
(-0.000000  0.000000  0.000000)
(-0.000000  0.000000  -0.000000)
(-0.000000  0.000000  0.000000)
(-0.000000  0.000000  0.000000)
(-0.000000  0.000000  -0.000000)
(-0.000000  0.000000  0.000000)
(-0.000000  0.000000  -0.000000)
(-0.000000  0.000000  0.000000)
(-0.000000  0.000000  -0.000000)
(-0.000000  0.000000  0.000000)
(-0.000000  0.000000  -0.000000)
(-0.000000  0.000000  0.000000)
(-0.000000  0.000000  -0.000000)
(-0.000000  0.000000  0.000000)
(-0.000000  0.000000  0.000000)
(-0.000000  0.000000  0.000000)
(-0.000000  0.000000  -0.000000)
(-0.000000  0.000000  0.000000)
(-0.000000  0.000000  -0.000000)
(-0.000000  0.000000  -0.000000)
(-0.000000  0.000000  -0.000000)
(-0.000000  0.000000  0.000000)
(-0.000000  0.000000  -0.000000)
(-0.000000  0.000000  0.000000)
(-0.000000  0.000000  -0.000000)
(-0.000000  0.000000  0.000000)
(-0.000000  0.000000  -0.000000)
(-0.000000  0.000000  0.000000)
(-0.000000  0.000000  0.000000)
(-0.000000  0.000000  -0.000000)
(-0.000000  0.000000  0.000000)
(-0.000000  0.000000  0.000000)
(-0.000000  0.000000  -0.000000)
(-0.000000  0.000000  0.000000)
(-0.000000  0.000000  -0.000000)
(-0.000000  0.000000  -0.000000)
(-0.000000  0.000000  -0.000000)
(-0.000000  0.000000  0.000000)
(-0.000000  0.000000  -0.000000)
(-0.000000  0.000000  0.000000)
(-0.000000  0.000000  -0.000000)
(-0.000000  0.000000  0.000000)
(-0.000000  0.000000  0.000000)
(-0.000000  0.000000  -0.000000)
(-0.000000  0.000000  0.000000)
(-0.000000  0.000000  -0.000000)
(-0.000000  0.000000  -0.000000)
(-0.000000  0.000000  0.000000)
(-0.000000  0.000000  -0.000000)
(-0.000000  0.000000  -0.000000)
(-0.000000  0.000000  0.000000)
(-0.000000  0.000000  -0.000000)
(-0.000000  0.000000  -0.000000)
(-0.000000  0.000000  -0.000000)
(-0.000000  0.000000  0.000000)
(-0.000000  0.000000  0.000000)
(-0.000000  0.000000  -0.000000)
(0.000000  0.000000  -0.000000)
(-0.000000  0.000000  -0.000000)
(-0.000000  0.000000  -0.000000)
(-0.000000  0.000000  0.000000)
(-0.000000  0.000000  -0.000000)
(-0.000000  0.000000  -0.000000)
(-0.000000  0.000000  0.000000)
(-0.000000  0.000000  -0.000000)
(-0.000000  0.000000  0.000000)
(-0.000000  0.000000  -0.000000)
(-0.000000  0.000000  0.000000)
(-0.000000  0.000000  -0.000000)
(-0.000000  0.000000  0.000000)
(-0.000000  0.000000  0.000000)
(-0.000000  0.000000  0.000000)
(-0.000000  0.000000  -0.000000)
(-0.000000  0.000000  -0.000000)
(-0.000000  0.000000  0.000000)
(-0.000000  0.000000  0.000000)
(-0.000000  0.000000  -0.000000)
(-0.000000  0.000000  0.000000)
(-0.000000  0.000000  0.000000)
(-0.000000  0.000000  -0.000000)
(-0.000000  0.000000  0.000000)
(-0.000000  0.000000  0.000000)
(-0.000000  0.000000  -0.000000)
(-0.000000  0.000000  -0.000000)
(-0.000000  0.000000  -0.000000)
(-0.000000  0.000000  0.000000)
(-0.000000  0.000000  0.000000)
(-0.000000  0.000000  -0.000000)
(-0.000000  0.000000  0.000000)
(-0.000000  0.000000  -0.000000)
(-0.000000  0.000000  -0.000000)
(-0.000000  0.000000  -0.000000)
(-0.000000  0.000000  0.000000)
(-0.000000  0.000000  -0.000000)
(-0.000000  0.000000  0.000000)
(-0.000000  0.000000  -0.000000)
(-0.000000  0.000000  0.000000)
(0.000000  0.000000  -0.000000)
(0.000000  0.000000  -0.000000)
(0.000000  0.000000  -0.000000)
(0.000000  0.000000  0.000000)
(-0.000000  0.000000  -0.000000)
(-0.000000  0.000000  0.000000)
(0.000000  0.000000  -0.000000)
(0.000000  0.000000  0.000000)
(0.000000  0.000000  -0.000000)
(-0.000000  0.000000  -0.000000)
(0.000000  0.000000  0.000000)
(0.000000  0.000000  -0.000000)
(0.000000  0.000000  -0.000000)
(0.000000  0.000000  -0.000000)
(0.000000  0.000000  -0.000000)
(0.000000  0.000000  0.000000)
(0.000000  0.000000  -0.000000)
(0.000000  0.000000  0.000000)
(0.000000  0.000000  -0.000000)
(0.000000  0.000000  -0.000000)
(0.000000  0.000000  -0.000000)
(0.000000  0.000000  -0.000000)
(0.000000  0.000000  -0.000000)
(0.000000  0.000000  -0.000000)
(0.000000  0.000000  -0.000000)
(0.000000  0.000000  -0.000000)
(0.000000  0.000000  -0.000000)
(0.000000  0.000000  -0.000000)
(0.000000  0.000000  -0.000000)
(0.000000  0.000000  -0.000000)
(0.000000  0.000000  -0.000000)
(0.000000  0.000000  -0.000000)
(0.000000  0.000000  -0.000000)
(0.000000  0.000000  -0.000000)
(0.000000  0.000000  -0.000000)
(0.000000  0.000000  -0.000000)
(0.000000  0.000000  -0.000000)
(0.000000  0.000000  -0.000000)
(0.000000  0.000000  -0.000000)
(0.000000  0.000000  -0.000000)
(0.000000  0.000000  -0.000000)
(0.000000  0.000000  -0.000000)
(0.000000  0.000000  -0.000000)
(0.000000  0.000000  -0.000000)
(0.000000  0.000000  -0.000000)
(0.000000  0.000000  -0.000000)
(0.000000  0.000000  -0.000000)
(0.000000  0.000000  -0.000000)
(0.000000  0.000000  -0.000000)
(0.000000  0.000000  -0.000000)
(0.000000  0.000000  -0.000000)
(0.000000  0.000000  -0.000000)
(0.000000  0.000000  -0.000000)
(0.000000  0.000000  -0.000000)
(0.000000  0.000000  -0.000000)
(0.000000  0.000000  -0.000000)
(0.000000  0.000000  -0.000000)
(0.000000  0.000000  -0.000000)
(0.000000  0.000000  -0.000000)
(0.000000  0.000000  -0.000000)
(0.000000  0.000000  -0.000000)
(0.000000  0.000000  -0.000000)
(0.000000  0.000000  -0.000000)
(0.000000  0.000000  -0.000000)
(0.000000  0.000000  -0.000000)
(0.000000  0.000000  -0.000000)
(0.000000  0.000000  -0.000000)
(0.000000  0.000000  -0.000000)
(0.000000  0.000000  -0.000000)
(0.000000  0.000000  -0.000000)
(0.000000  0.000000  -0.000000)
(0.000000  0.000000  -0.000000)
(0.000000  0.000000  -0.000000)
(0.000000  0.000000  -0.000000)
(0.000000  0.000000  -0.000000)
(0.000000  0.000000  -0.000000)
(0.000000  0.000000  -0.000000)
(0.000000  0.000000  -0.000000)
(0.000000  0.000000  -0.000000)
(0.000000  0.000000  -0.000000)
(0.000000  0.000000  -0.000000)
(0.000000  0.000000  -0.000000)
(0.000000  0.000000  -0.000000)
(0.000000  0.000000  -0.000000)
(0.000000  0.000000  -0.000000)
(0.000000  0.000000  -0.000000)
(0.000000  0.000000  -0.000000)
(0.000000  0.000000  -0.000000)
(0.000000  0.000000  -0.000000)
(0.000000  0.000000  -0.000000)
(0.000000  0.000000  -0.000000)
(0.000000  0.000000  -0.000000)
(0.000000  0.000000  -0.000000)
(0.000000  0.000000  -0.000000)
(0.000000  0.000000  -0.000000)
(0.000000  0.000000  -0.000000)
(0.000000  0.000000  -0.000000)
(0.000000  0.000000  -0.000000)
(0.000000  0.000000  -0.000000)
(0.000000  0.000000  -0.000000)
(0.000000  0.000000  -0.000000)
(0.000000  0.000000  -0.000000)
(0.000000  0.000000  -0.000000)
(0.000000  0.000000  -0.000000)
(0.000000  0.000000  -0.000000)
(0.000000  0.000000  -0.000000)
(0.000000  0.000000  -0.000000)
(0.000000  0.000000  -0.000000)
(0.000000  0.000000  -0.000000)
(0.000000  0.000000  -0.000000)
(0.000000  0.000000  -0.000000)
(0.000000  0.000000  -0.000000)
(0.000000  0.000000  -0.000000)
(0.000000  0.000000  -0.000000)
(0.000000  0.000000  -0.000000)
(0.000000  0.000000  -0.000000)
(0.000000  0.000000  -0.000000)
(0.000000  0.000000  -0.000000)
(0.000000  0.000000  -0.000000)
(0.000000  0.000000  -0.000000)
(0.000000  0.000000  -0.000000)
(0.000000  0.000000  -0.000000)
(0.000000  0.000000  -0.000000)
(0.000000  0.000000  -0.000000)
(0.000000  0.000000  -0.000000)
(0.000000  0.000000  -0.000000)
(0.000000  0.000000  -0.000000)
(0.000000  0.000000  -0.000000)
(0.000000  0.000000  -0.000000)
(0.000000  0.000000  -0.000000)
(0.000000  0.000000  -0.000000)
(0.000000  0.000000  -0.000000)
(0.000000  0.000000  -0.000000)
(0.000000  0.000000  -0.000000)
(0.000000  0.000000  -0.000000)
(0.000000  0.000000  -0.000000)
(0.000000  0.000000  -0.000000)
(0.000000  0.000000  -0.000000)
(0.000000  0.000000  -0.000000)
(0.000000  0.000000  -0.000000)
(0.000000  0.000000  -0.000000)
(0.000000  0.000000  -0.000000)
(0.000000  0.000000  -0.000000)
(0.000000  0.000000  -0.000000)
(0.000000  0.000000  -0.000000)
(0.000000  0.000000  -0.000000)
(0.000000  0.000000  -0.000000)
(0.000000  0.000000  -0.000000)
(0.000000  0.000000  -0.000000)
(0.000000  0.000000  -0.000000)
(0.000000  0.000000  -0.000000)
(0.000000  0.000000  -0.000000)
(0.000000  0.000000  -0.000000)
(0.000000  0.000000  -0.000000)
(0.000000  0.000000  -0.000000)
(0.000000  0.000000  -0.000000)
(0.000000  0.000000  -0.000000)
(0.000000  0.000000  -0.000000)
(0.000000  0.000000  -0.000000)
(0.000000  0.000000  -0.000000)
(0.000000  0.000000  -0.000000)
(0.000000  0.000000  -0.000000)
(0.000000  0.000000  -0.000000)
(0.000000  0.000000  -0.000000)
(0.000000  0.000000  -0.000000)
(0.000000  0.000000  -0.000000)
(0.000000  0.000000  -0.000000)
(0.000000  0.000000  -0.000000)
(0.000000  0.000000  -0.000000)
(0.000000  0.000000  -0.000000)
(0.000000  0.000000  -0.000000)
(0.000000  0.000000  -0.000000)
(0.000000  0.000000  -0.000000)
(0.000000  0.000000  -0.000000)
(0.000000  0.000000  -0.000000)
(0.000000  0.000000  -0.000000)
(0.000000  0.000000  -0.000000)
(0.000000  0.000000  -0.000000)
(0.000000  0.000000  -0.000000)
(0.000000  0.000000  -0.000000)
(0.000000  0.000000  -0.000000)
(0.000000  0.000000  -0.000000)
(0.000000  0.000000  -0.000000)
(0.000000  0.000000  -0.000000)
(0.000000  0.000000  -0.000000)
(0.000000  0.000000  -0.000000)
(0.000000  0.000000  -0.000000)
(0.000000  0.000000  -0.000000)
(0.000000  0.000000  -0.000000)
(0.000000  0.000000  -0.000000)
(0.000000  0.000000  -0.000000)
(0.000000  0.000000  -0.000000)
(0.000000  0.000000  -0.000000)
(0.000000  0.000000  -0.000000)
(0.000000  0.000000  -0.000000)
(0.000000  0.000000  -0.000000)
(0.000000  0.000000  -0.000000)
(0.000000  0.000000  -0.000000)
(0.000000  0.000000  -0.000000)
(0.000000  0.000000  -0.000000)
(0.000000  0.000000  -0.000000)
(0.000000  0.000000  -0.000000)
(0.000000  0.000000  -0.000000)
(0.000000  0.000000  -0.000000)
(0.000000  0.000000  -0.000000)
(0.000000  0.000000  -0.000000)
(0.000000  0.000000  -0.000000)
(0.000000  0.000000  -0.000000)
(0.000000  0.000000  -0.000000)
(0.000000  0.000000  -0.000000)
(0.000000  0.000000  -0.000000)
(0.000000  0.000000  -0.000000)
(0.000000  0.000000  -0.000000)
(0.000000  0.000000  -0.000000)
(0.000000  0.000000  -0.000000)
(0.000000  0.000000  -0.000000)
(0.000000  0.000000  -0.000000)
(0.000000  0.000000  -0.000000)
(0.000000  0.000000  -0.000000)
(0.000000  0.000000  -0.000000)
(0.000000  0.000000  -0.000000)
(0.000000  0.000000  -0.000000)
(0.000000  0.000000  -0.000000)
(0.000000  0.000000  -0.000000)
(0.000000  0.000000  -0.000000)
(0.000000  0.000000  -0.000000)
(0.000000  0.000000  -0.000000)
(0.000000  0.000000  -0.000000)
(0.000000  0.000000  -0.000000)
(0.000000  0.000000  -0.000000)
(0.000000  0.000000  -0.000000)
(0.000000  0.000000  -0.000000)
(0.000000  0.000000  -0.000000)
(0.000000  0.000000  -0.000000)
(0.000000  0.000000  -0.000000)
(0.000000  0.000000  -0.000000)
(0.000000  0.000000  -0.000000)
(0.000000  0.000000  -0.000000)
(0.000000  0.000000  -0.000000)
(0.000000  0.000000  -0.000000)
(0.000000  0.000000  -0.000000)
(0.000000  0.000000  -0.000000)
(0.000000  0.000000  -0.000000)
(0.000000  0.000000  -0.000000)
(0.000000  0.000000  -0.000000)
(0.000000  0.000000  -0.000000)
(0.000000  0.000000  -0.000000)
(0.000000  0.000000  -0.000000)
(0.000000  0.000000  -0.000000)
(0.000000  0.000000  -0.000000)
(0.000000  0.000000  -0.000000)
(0.000000  0.000000  -0.000000)
(0.000000  0.000000  -0.000000)
(0.000000  0.000000  -0.000000)
(0.000000  0.000000  -0.000000)
(0.000000  0.000000  -0.000000)
(0.000000  0.000000  -0.000000)
(0.000000  0.000000  -0.000000)
(0.000000  0.000000  -0.000000)
(0.000000  0.000000  -0.000000)
(0.000000  0.000000  -0.000000)
(0.000000  0.000000  -0.000000)
(0.000000  0.000000  -0.000000)
(0.000000  0.000000  -0.000000)
(0.000000  0.000000  -0.000000)
(0.000000  0.000000  -0.000000)
(0.000000  0.000000  -0.000000)
(0.000000  0.000000  -0.000000)
(0.000000  0.000000  -0.000000)
(0.000000  0.000000  -0.000000)
(0.000000  0.000000  -0.000000)
(0.000000  0.000000  -0.000000)
(0.000000  0.000000  -0.000000)
(0.000000  0.000000  -0.000000)
(0.000000  0.000000  -0.000000)
(0.000000  0.000000  -0.000000)
(0.000000  0.000000  -0.000000)
(0.000000  0.000000  -0.000000)
(0.000000  0.000000  -0.000000)
(0.000000  0.000000  -0.000000)
(0.000000  0.000000  -0.000000)
(0.000000  0.000000  -0.000000)
(0.000000  0.000000  -0.000000)
(0.000000  0.000000  -0.000000)
(0.000000  0.000000  -0.000000)
(0.000000  0.000000  -0.000000)
(0.000000  0.000000  -0.000000)
(0.000000  0.000000  -0.000000)
(0.000000  0.000000  -0.000000)
(0.000000  0.000000  -0.000000)
(0.000000  0.000000  -0.000000)
(0.000000  0.000000  -0.000000)
(0.000000  0.000000  -0.000000)
(0.000000  0.000000  -0.000000)
(0.000000  0.000000  -0.000000)
(0.000000  0.000000  -0.000000)
(0.000000  0.000000  -0.000000)
(0.000000  0.000000  -0.000000)
(0.000000  0.000000  -0.000000)
(0.000000  0.000000  -0.000000)
(0.000000  0.000000  -0.000000)
(0.000000  0.000000  -0.000000)
(0.000000  0.000000  -0.000000)
(0.000001  0.000000  -0.000000)
(0.000001  0.000000  -0.000000)
(0.000001  0.000000  -0.000000)
(0.000001  0.000000  -0.000000)
(0.000001  0.000000  -0.000000)
(0.000001  0.000000  -0.000000)
(0.000001  0.000000  -0.000000)
(0.000001  0.000000  -0.000000)
(0.000001  0.000000  -0.000000)
(0.000001  0.000000  -0.000000)
(0.000001  0.000000  -0.000000)
(0.000001  0.000000  -0.000000)
(0.000001  0.000000  -0.000000)
(0.000001  0.000000  -0.000000)
(0.000002  0.000000  -0.000000)
(0.000002  0.000000  -0.000000)
(0.000002  0.000000  -0.000000)
(0.000002  0.000000  -0.000000)
(0.000002  0.000000  -0.000000)
(0.000002  0.000000  -0.000000)
(0.000003  0.000000  -0.000000)
(0.000003  0.000000  -0.000000)
(0.000003  0.000000  -0.000000)
(0.000003  0.000000  -0.000000)
(0.000004  0.000000  -0.000000)
(0.000004  0.000000  -0.000000)
(0.000004  0.000000  -0.000000)
(0.000005  0.000000  -0.000000)
(0.000005  0.000000  -0.000000)
(0.000005  0.000000  -0.000000)
(0.000006  0.000000  -0.000000)
(0.000006  0.000000  -0.000000)
(0.000007  0.000000  -0.000001)
(0.000008  0.000000  -0.000001)
(0.000008  0.000000  -0.000001)
(0.000009  0.000000  -0.000001)
(0.000010  0.000000  -0.000001)
(0.000011  0.000000  -0.000001)
(0.000011  0.000000  -0.000001)
(0.000012  0.000000  -0.000001)
(0.000013  0.000000  -0.000001)
(0.000015  0.000000  -0.000001)
(0.000016  0.000000  -0.000001)
(0.000017  0.000000  -0.000001)
(0.000019  0.000000  -0.000001)
(0.000020  0.000000  -0.000002)
(0.000022  0.000000  -0.000002)
(0.000024  0.000000  -0.000002)
(0.000026  0.000000  -0.000002)
(0.000028  0.000000  -0.000002)
(0.000030  0.000000  -0.000002)
(0.000033  0.000000  -0.000003)
(0.000036  0.000000  -0.000003)
(0.000039  0.000000  -0.000003)
(0.000042  0.000000  -0.000003)
(0.000046  0.000000  -0.000004)
(0.000050  0.000000  -0.000004)
(0.000054  0.000000  -0.000004)
(0.000058  0.000000  -0.000004)
(0.000063  0.000000  -0.000005)
(0.000069  0.000000  -0.000005)
(0.000075  0.000000  -0.000006)
(0.000081  0.000000  -0.000006)
(0.000088  0.000000  -0.000007)
(0.000095  0.000000  -0.000007)
(0.000104  0.000000  -0.000008)
(0.000112  0.000000  -0.000009)
(0.000122  0.000000  -0.000009)
(0.000132  0.000000  -0.000010)
(0.000143  0.000000  -0.000011)
(0.000156  0.000000  -0.000012)
(0.000169  0.000000  -0.000013)
(0.000183  0.000000  -0.000014)
(0.000198  0.000000  -0.000015)
(0.000215  0.000000  -0.000016)
(0.000233  0.000000  -0.000018)
(0.000253  0.000000  -0.000019)
(0.000275  0.000000  -0.000021)
(0.000298  0.000000  -0.000023)
(0.000323  0.000000  -0.000025)
(0.000350  0.000000  -0.000027)
(0.000380  0.000000  -0.000029)
(0.000411  0.000000  -0.000031)
(0.000446  0.000000  -0.000034)
(0.000483  0.000000  -0.000037)
(0.000524  0.000000  -0.000040)
(0.000568  0.000000  -0.000043)
(0.000615  0.000000  -0.000046)
(0.000666  0.000000  -0.000050)
(0.000722  0.000000  -0.000054)
(0.000782  0.000000  -0.000059)
(0.000847  0.000000  -0.000063)
(0.000917  0.000000  -0.000068)
(0.000993  0.000000  -0.000074)
(0.001075  0.000000  -0.000080)
(0.001163  0.000000  -0.000086)
(0.001258  0.000000  -0.000093)
(0.001361  0.000000  -0.000100)
(0.001472  0.000000  -0.000108)
(0.001592  0.000000  -0.000116)
(0.001720  0.000000  -0.000125)
(0.001859  0.000000  -0.000135)
(0.002008  0.000000  -0.000145)
(0.002169  0.000000  -0.000156)
(0.002341  0.000000  -0.000168)
(0.002526  0.000000  -0.000180)
(0.002725  0.000000  -0.000193)
(0.002938  0.000000  -0.000207)
(0.003167  0.000000  -0.000222)
(0.003412  0.000000  -0.000238)
(0.003673  0.000000  -0.000254)
(0.003953  0.000000  -0.000271)
(0.004252  0.000000  -0.000289)
(0.004570  0.000000  -0.000308)
(0.004910  0.000000  -0.000328)
(0.005271  0.000000  -0.000349)
(0.005654  0.000000  -0.000371)
(0.006061  0.000000  -0.000393)
(0.006493  0.000000  -0.000416)
(0.006949  0.000000  -0.000440)
(0.007432  0.000000  -0.000465)
(0.007941  0.000000  -0.000490)
(0.008476  0.000000  -0.000515)
(0.009039  0.000000  -0.000541)
(0.009630  0.000000  -0.000567)
(0.010248  0.000000  -0.000593)
(0.010894  0.000000  -0.000618)
(0.011568  0.000000  -0.000644)
(0.012268  0.000000  -0.000669)
(0.012995  0.000000  -0.000693)
(0.013747  0.000000  -0.000716)
(0.014523  0.000000  -0.000738)
(0.015321  0.000000  -0.000758)
(0.016140  0.000000  -0.000777)
(0.016979  0.000000  -0.000793)
(0.017833  0.000000  -0.000807)
(0.018701  0.000000  -0.000819)
(0.019580  0.000000  -0.000827)
(0.020466  0.000000  -0.000832)
(0.021356  0.000000  -0.000834)
(0.022246  0.000000  -0.000832)
(0.023132  0.000000  -0.000826)
(0.024010  0.000000  -0.000816)
(0.024874  0.000000  -0.000802)
(0.025721  0.000000  -0.000783)
(0.026546  0.000000  -0.000760)
(0.027343  0.000000  -0.000732)
(0.028109  0.000000  -0.000700)
(0.028838  0.000000  -0.000663)
(0.029525  0.000000  -0.000622)
(0.030167  0.000000  -0.000577)
(0.030758  0.000000  -0.000528)
(0.031295  0.000000  -0.000476)
(0.031774  0.000000  -0.000419)
(0.032191  0.000000  -0.000360)
(0.032543  0.000000  -0.000298)
(0.032828  0.000000  -0.000234)
(0.033044  0.000000  -0.000169)
(0.033188  0.000000  -0.000102)
(0.033261  0.000000  -0.000034)
(0.033261  0.000000  0.000034)
(0.033188  0.000000  0.000102)
(0.033044  0.000000  0.000169)
(0.032828  0.000000  0.000234)
(0.032543  0.000000  0.000298)
(0.032191  0.000000  0.000360)
(0.031774  0.000000  0.000419)
(0.031295  0.000000  0.000476)
(0.030758  0.000000  0.000528)
(0.030167  0.000000  0.000577)
(0.029525  0.000000  0.000622)
(0.028838  0.000000  0.000663)
(0.028109  0.000000  0.000700)
(0.027343  0.000000  0.000732)
(0.026546  0.000000  0.000760)
(0.025721  0.000000  0.000783)
(0.024874  0.000000  0.000802)
(0.024010  0.000000  0.000816)
(0.023132  0.000000  0.000826)
(0.022246  0.000000  0.000832)
(0.021356  0.000000  0.000834)
(0.020466  0.000000  0.000832)
(0.019580  0.000000  0.000827)
(0.018701  0.000000  0.000819)
(0.017833  0.000000  0.000807)
(0.016979  0.000000  0.000793)
(0.016140  0.000000  0.000777)
(0.015321  0.000000  0.000758)
(0.014523  0.000000  0.000738)
(0.013747  0.000000  0.000716)
(0.012995  0.000000  0.000693)
(0.012268  0.000000  0.000669)
(0.011568  0.000000  0.000644)
(0.010894  0.000000  0.000618)
(0.010248  0.000000  0.000593)
(0.009630  0.000000  0.000567)
(0.009039  0.000000  0.000541)
(0.008476  0.000000  0.000515)
(0.007941  0.000000  0.000490)
(0.007432  0.000000  0.000465)
(0.006949  0.000000  0.000440)
(0.006493  0.000000  0.000416)
(0.006061  0.000000  0.000393)
(0.005654  0.000000  0.000371)
(0.005271  0.000000  0.000349)
(0.004910  0.000000  0.000328)
(0.004570  0.000000  0.000308)
(0.004252  0.000000  0.000289)
(0.003953  0.000000  0.000271)
(0.003673  0.000000  0.000254)
(0.003412  0.000000  0.000238)
(0.003167  0.000000  0.000222)
(0.002938  0.000000  0.000207)
(0.002725  0.000000  0.000193)
(0.002526  0.000000  0.000180)
(0.002341  0.000000  0.000168)
(0.002169  0.000000  0.000156)
(0.002008  0.000000  0.000145)
(0.001859  0.000000  0.000135)
(0.001720  0.000000  0.000125)
(0.001592  0.000000  0.000116)
(0.001472  0.000000  0.000108)
(0.001361  0.000000  0.000100)
(0.001258  0.000000  0.000093)
(0.001163  0.000000  0.000086)
(0.001075  0.000000  0.000080)
(0.000993  0.000000  0.000074)
(0.000917  0.000000  0.000068)
(0.000847  0.000000  0.000063)
(0.000782  0.000000  0.000059)
(0.000722  0.000000  0.000054)
(0.000666  0.000000  0.000050)
(0.000615  0.000000  0.000046)
(0.000568  0.000000  0.000043)
(0.000524  0.000000  0.000040)
(0.000483  0.000000  0.000037)
(0.000446  0.000000  0.000034)
(0.000411  0.000000  0.000031)
(0.000380  0.000000  0.000029)
(0.000350  0.000000  0.000027)
(0.000323  0.000000  0.000025)
(0.000298  0.000000  0.000023)
(0.000275  0.000000  0.000021)
(0.000253  0.000000  0.000019)
(0.000233  0.000000  0.000018)
(0.000215  0.000000  0.000016)
(0.000198  0.000000  0.000015)
(0.000183  0.000000  0.000014)
(0.000169  0.000000  0.000013)
(0.000156  0.000000  0.000012)
(0.000143  0.000000  0.000011)
(0.000132  0.000000  0.000010)
(0.000122  0.000000  0.000009)
(0.000112  0.000000  0.000009)
(0.000104  0.000000  0.000008)
(0.000095  0.000000  0.000007)
(0.000088  0.000000  0.000007)
(0.000081  0.000000  0.000006)
(0.000075  0.000000  0.000006)
(0.000069  0.000000  0.000005)
(0.000063  0.000000  0.000005)
(0.000058  0.000000  0.000004)
(0.000054  0.000000  0.000004)
(0.000050  0.000000  0.000004)
(0.000046  0.000000  0.000004)
(0.000042  0.000000  0.000003)
(0.000039  0.000000  0.000003)
(0.000036  0.000000  0.000003)
(0.000033  0.000000  0.000003)
(0.000030  0.000000  0.000002)
(0.000028  0.000000  0.000002)
(0.000026  0.000000  0.000002)
(0.000024  0.000000  0.000002)
(0.000022  0.000000  0.000002)
(0.000020  0.000000  0.000002)
(0.000019  0.000000  0.000001)
(0.000017  0.000000  0.000001)
(0.000016  0.000000  0.000001)
(0.000015  0.000000  0.000001)
(0.000013  0.000000  0.000001)
(0.000012  0.000000  0.000001)
(0.000011  0.000000  0.000001)
(0.000011  0.000000  0.000001)
(0.000010  0.000000  0.000001)
(0.000009  0.000000  0.000001)
(0.000000  0.000000  -0.000000)
(0.000000  0.000000  0.000000)
(0.000000  0.000000  -0.000000)
(0.000000  0.000000  -0.000000)
(0.000000  0.000000  0.000000)
(0.000000  0.000000  -0.000000)
(0.000000  0.000000  0.000000)
(0.000000  0.000000  -0.000000)
(0.000000  0.000000  0.000000)
(0.000000  0.000000  -0.000000)
(0.000000  0.000000  0.000000)
(0.000000  0.000000  -0.000000)
(0.000000  0.000000  0.000000)
(0.000000  0.000000  -0.000000)
(0.000000  0.000000  -0.000000)
(0.000000  0.000000  0.000000)
(0.000000  0.000000  -0.000000)
(0.000000  0.000000  0.000000)
(0.000000  0.000000  0.000000)
(0.000000  0.000000  -0.000000)
(0.000000  0.000000  0.000000)
(0.000000  0.000000  -0.000000)
(0.000000  0.000000  0.000000)
(0.000000  0.000000  -0.000000)
(0.000000  0.000000  0.000000)
(0.000000  0.000000  0.000000)
(0.000000  0.000000  -0.000000)
(0.000000  0.000000  0.000000)
(0.000000  0.000000  -0.000000)
(0.000000  0.000000  0.000000)
(0.000000  0.000000  0.000000)
(0.000000  0.000000  -0.000000)
(0.000000  0.000000  0.000000)
(0.000000  0.000000  -0.000000)
(0.000000  0.000000  -0.000000)
(0.000000  0.000000  -0.000000)
(0.000000  0.000000  0.000000)
(0.000000  0.000000  -0.000000)
(0.000000  0.000000  0.000000)
(0.000000  0.000000  -0.000000)
(0.000000  0.000000  0.000000)
(-0.000000  0.000000  -0.000000)
(0.000000  0.000000  0.000000)
(-0.000000  0.000000  -0.000000)
(-0.000000  0.000000  0.000000)
(-0.000000  0.000000  -0.000000)
(-0.000000  0.000000  0.000000)
(-0.000000  0.000000  -0.000000)
(-0.000000  0.000000  -0.000000)
(-0.000000  0.000000  0.000000)
(-0.000000  0.000000  -0.000000)
(-0.000000  0.000000  0.000000)
(-0.000000  0.000000  0.000000)
(-0.000000  0.000000  0.000000)
(-0.000000  0.000000  -0.000000)
(-0.000000  0.000000  0.000000)
(-0.000000  0.000000  0.000000)
(-0.000000  0.000000  -0.000000)
(-0.000000  0.000000  -0.000000)
(-0.000000  0.000000  0.000000)
(-0.000000  0.000000  -0.000000)
(-0.000000  0.000000  -0.000000)
(-0.000000  0.000000  0.000000)
(-0.000000  0.000000  0.000000)
(-0.000000  0.000000  0.000000)
(-0.000000  0.000000  -0.000000)
(-0.000000  0.000000  0.000000)
(-0.000000  0.000000  -0.000000)
(-0.000000  0.000000  0.000000)
(-0.000000  0.000000  -0.000000)
(-0.000000  0.000000  0.000000)
(-0.000000  0.000000  -0.000000)
(-0.000000  0.000000  0.000000)
(-0.000000  0.000000  -0.000000)
(-0.000000  0.000000  -0.000000)
(-0.000000  0.000000  0.000000)
(-0.000000  0.000000  0.000000)
(-0.000000  0.000000  -0.000000)
(-0.000000  0.000000  0.000000)
(-0.000000  0.000000  -0.000000)
(-0.000000  0.000000  0.000000)
(-0.000000  0.000000  -0.000000)
(-0.000000  0.000000  0.000000)
(-0.000000  0.000000  -0.000000)
(-0.000000  0.000000  0.000000)
(-0.000000  0.000000  -0.000000)
(-0.000000  0.000000  0.000000)
(-0.000000  0.000000  -0.000000)
(-0.000000  0.000000  0.000000)
(-0.000000  0.000000  -0.000000)
(-0.000000  0.000000  0.000000)
(-0.000000  0.000000  0.000000)
(-0.000000  0.000000  -0.000000)
(-0.000000  0.000000  0.000000)
(-0.000000  0.000000  -0.000000)
(-0.000000  0.000000  0.000000)
(-0.000000  0.000000  0.000000)
(-0.000000  0.000000  -0.000000)
(-0.000000  0.000000  -0.000000)
(-0.000000  0.000000  -0.000000)
(-0.000000  0.000000  0.000000)
(-0.000000  0.000000  -0.000000)
(-0.000000  0.000000  0.000000)
(-0.000000  0.000000  0.000000)
(-0.000000  0.000000  -0.000000)
(-0.000000  0.000000  0.000000)
(-0.000000  0.000000  0.000000)
(-0.000000  0.000000  -0.000000)
(0.000000  0.000000  0.000000)
(0.000000  0.000000  -0.000000)
(0.000000  0.000000  0.000000)
(0.000000  0.000000  0.000000)
(0.000000  0.000000  -0.000000)
(0.000000  0.000000  0.000000)
(0.000000  0.000000  -0.000000)
(0.000000  0.000000  -0.000000)
(-0.000000  0.000000  0.000000)
(0.000000  0.000000  -0.000000)
(0.000000  0.000000  -0.000000)
(0.000000  0.000000  -0.000000)
(0.000000  0.000000  0.000000)
(0.000000  0.000000  -0.000000)
(0.000000  0.000000  0.000000)
(0.000000  0.000000  -0.000000)
(0.000000  0.000000  0.000000)
(0.000000  0.000000  -0.000000)
(0.000000  0.000000  0.000000)
(0.000000  0.000000  -0.000000)
(0.000000  0.000000  0.000000)
(0.000000  0.000000  -0.000000)
(0.000000  0.000000  -0.000000)
(0.000000  0.000000  0.000000)
(0.000000  0.000000  -0.000000)
(0.000000  0.000000  -0.000000)
(0.000000  0.000000  0.000000)
(0.000000  0.000000  -0.000000)
(0.000000  0.000000  0.000000)
(0.000000  0.000000  -0.000000)
(0.000000  0.000000  0.000000)
(0.000000  0.000000  -0.000000)
(0.000000  0.000000  0.000000)
(0.000000  0.000000  0.000000)
(0.000000  0.000000  -0.000000)
(0.000000  0.000000  0.000000)
(0.000000  0.000000  -0.000000)
(0.000000  0.000000  -0.000000)
(0.000000  0.000000  0.000000)
(0.000000  0.000000  -0.000000)
(0.000000  0.000000  -0.000000)
(0.000000  0.000000  0.000000)
(0.000000  0.000000  -0.000000)
(0.000000  0.000000  0.000000)
(0.000000  0.000000  -0.000000)
(0.000000  0.000000  0.000000)
(0.000000  0.000000  -0.000000)
(0.000000  0.000000  -0.000000)
(0.000000  0.000000  0.000000)
(0.000000  0.000000  -0.000000)
(0.000000  0.000000  0.000000)
(0.000000  0.000000  0.000000)
(0.000000  0.000000  -0.000000)
(0.000000  0.000000  0.000000)
(0.000000  0.000000  -0.000000)
(0.000000  0.000000  0.000000)
(0.000000  0.000000  -0.000000)
(0.000000  0.000000  -0.000000)
(0.000000  0.000000  0.000000)
(0.000000  0.000000  -0.000000)
(0.000000  0.000000  0.000000)
(0.000000  0.000000  -0.000000)
(0.000000  0.000000  -0.000000)
(0.000000  0.000000  0.000000)
(0.000000  0.000000  -0.000000)
(0.000000  0.000000  0.000000)
(0.000000  0.000000  -0.000000)
(0.000000  0.000000  -0.000000)
(0.000000  0.000000  -0.000000)
(0.000000  0.000000  -0.000000)
(0.000000  0.000000  -0.000000)
(0.000000  0.000000  0.000000)
(0.000000  0.000000  -0.000000)
(0.000000  0.000000  0.000000)
(0.000000  0.000000  -0.000000)
(0.000000  0.000000  0.000000)
(-0.000000  0.000000  -0.000000)
(0.000000  0.000000  -0.000000)
(0.000000  0.000000  -0.000000)
(0.000000  0.000000  -0.000000)
(0.000000  0.000000  -0.000000)
(0.000000  0.000000  -0.000000)
(0.000000  0.000000  -0.000000)
(0.000000  0.000000  -0.000000)
(0.000000  0.000000  -0.000000)
(0.000000  0.000000  -0.000000)
(0.000000  0.000000  -0.000000)
(0.000000  0.000000  -0.000000)
(0.000000  0.000000  -0.000000)
(0.000000  0.000000  -0.000000)
(0.000000  0.000000  -0.000000)
(0.000000  0.000000  -0.000000)
(0.000000  0.000000  -0.000000)
(0.000000  0.000000  -0.000000)
(0.000000  0.000000  -0.000000)
(0.000000  0.000000  -0.000000)
(0.000000  0.000000  -0.000000)
(0.000000  0.000000  -0.000000)
(0.000000  0.000000  -0.000000)
(0.000000  0.000000  -0.000000)
(0.000000  0.000000  -0.000000)
(0.000000  0.000000  -0.000000)
(0.000000  0.000000  -0.000000)
(0.000000  0.000000  -0.000000)
(0.000000  0.000000  -0.000000)
(0.000000  0.000000  -0.000000)
(0.000000  0.000000  -0.000000)
(0.000000  0.000000  -0.000000)
(0.000000  0.000000  -0.000000)
(0.000000  0.000000  -0.000000)
(0.000000  0.000000  -0.000000)
(0.000000  0.000000  -0.000000)
(0.000000  0.000000  -0.000000)
(0.000000  0.000000  -0.000000)
(0.000000  0.000000  -0.000000)
(0.000000  0.000000  -0.000000)
(0.000000  0.000000  -0.000000)
(0.000000  0.000000  -0.000000)
(0.000000  0.000000  -0.000000)
(0.000000  0.000000  -0.000000)
(0.000000  0.000000  -0.000000)
(0.000000  0.000000  -0.000000)
(0.000000  0.000000  -0.000000)
(0.000000  0.000000  -0.000000)
(0.000000  0.000000  -0.000000)
(0.000000  0.000000  -0.000000)
(0.000000  0.000000  -0.000000)
(0.000000  0.000000  -0.000000)
(0.000000  0.000000  -0.000000)
(0.000000  0.000000  -0.000000)
(0.000000  0.000000  -0.000000)
(0.000000  0.000000  -0.000000)
(0.000000  0.000000  -0.000000)
(0.000000  0.000000  -0.000000)
(0.000000  0.000000  -0.000000)
(0.000000  0.000000  -0.000000)
(0.000000  0.000000  -0.000000)
(0.000000  0.000000  -0.000000)
(0.000000  0.000000  -0.000000)
(0.000000  0.000000  -0.000000)
(0.000000  0.000000  -0.000000)
(0.000000  0.000000  -0.000000)
(0.000000  0.000000  -0.000000)
(0.000000  0.000000  -0.000000)
(0.000000  0.000000  -0.000000)
(0.000000  0.000000  -0.000000)
(0.000000  0.000000  -0.000000)
(0.000000  0.000000  -0.000000)
(0.000000  0.000000  -0.000000)
(0.000000  0.000000  -0.000000)
(0.000000  0.000000  -0.000000)
(0.000000  0.000000  -0.000000)
(0.000000  0.000000  -0.000000)
(0.000000  0.000000  -0.000000)
(0.000000  0.000000  -0.000000)
(0.000000  0.000000  -0.000000)
(0.000000  0.000000  -0.000000)
(0.000000  0.000000  -0.000000)
(0.000000  0.000000  -0.000000)
(0.000000  0.000000  -0.000000)
(0.000000  0.000000  -0.000000)
(0.000000  0.000000  -0.000000)
(0.000000  0.000000  -0.000000)
(0.000000  0.000000  -0.000000)
(0.000000  0.000000  -0.000000)
(0.000000  0.000000  -0.000000)
(0.000000  0.000000  -0.000000)
(0.000000  0.000000  -0.000000)
(0.000000  0.000000  -0.000000)
(0.000000  0.000000  -0.000000)
(0.000000  0.000000  -0.000000)
(0.000000  0.000000  -0.000000)
(0.000000  0.000000  -0.000000)
(0.000000  0.000000  -0.000000)
(0.000000  0.000000  -0.000000)
(0.000000  0.000000  -0.000000)
(0.000000  0.000000  -0.000000)
(0.000000  0.000000  -0.000000)
(0.000000  0.000000  -0.000000)
(0.000000  0.000000  -0.000000)
(0.000000  0.000000  -0.000000)
(0.000000  0.000000  -0.000000)
(0.000000  0.000000  -0.000000)
(0.000000  0.000000  -0.000000)
(0.000000  0.000000  -0.000000)
(0.000000  0.000000  -0.000000)
(0.000000  0.000000  -0.000000)
(0.000000  0.000000  -0.000000)
(0.000000  0.000000  -0.000000)
(0.000000  0.000000  -0.000000)
(0.000000  0.000000  -0.000000)
(0.000000  0.000000  -0.000000)
(0.000000  0.000000  -0.000000)
(0.000000  0.000000  -0.000000)
(0.000000  0.000000  -0.000000)
(0.000000  0.000000  -0.000000)
(0.000000  0.000000  -0.000000)
(0.000000  0.000000  -0.000000)
(0.000000  0.000000  -0.000000)
(0.000000  0.000000  -0.000000)
(0.000000  0.000000  -0.000000)
(0.000000  0.000000  -0.000000)
(0.000000  0.000000  -0.000000)
(0.000000  0.000000  -0.000000)
(0.000000  0.000000  -0.000000)
(0.000000  0.000000  -0.000000)
(0.000000  0.000000  -0.000000)
(0.000000  0.000000  -0.000000)
(0.000000  0.000000  -0.000000)
(0.000000  0.000000  -0.000000)
(0.000000  0.000000  -0.000000)
(0.000000  0.000000  -0.000000)
(0.000000  0.000000  -0.000000)
(0.000000  0.000000  -0.000000)
(0.000000  0.000000  -0.000000)
(0.000000  0.000000  -0.000000)
(0.000000  0.000000  -0.000000)
(0.000000  0.000000  -0.000000)
(0.000000  0.000000  -0.000000)
(0.000000  0.000000  -0.000000)
(0.000000  0.000000  -0.000000)
(0.000000  0.000000  -0.000000)
(0.000000  0.000000  -0.000000)
(0.000000  0.000000  -0.000000)
(0.000000  0.000000  -0.000000)
(0.000000  0.000000  -0.000000)
(0.000000  0.000000  -0.000000)
(0.000000  0.000000  -0.000000)
(0.000000  0.000000  -0.000000)
(0.000000  0.000000  -0.000000)
(0.000000  0.000000  -0.000000)
(0.000000  0.000000  -0.000000)
(0.000000  0.000000  -0.000000)
(0.000000  0.000000  -0.000000)
(0.000000  0.000000  -0.000000)
(0.000000  0.000000  -0.000000)
(0.000000  0.000000  -0.000000)
(0.000000  0.000000  -0.000000)
(0.000000  0.000000  -0.000000)
(0.000000  0.000000  -0.000000)
(0.000000  0.000000  -0.000000)
(0.000000  0.000000  -0.000000)
(0.000000  0.000000  -0.000000)
(0.000000  0.000000  -0.000000)
(0.000000  0.000000  -0.000000)
(0.000000  0.000000  -0.000000)
(0.000000  0.000000  -0.000000)
(0.000000  0.000000  -0.000000)
(0.000000  0.000000  -0.000000)
(0.000000  0.000000  -0.000000)
(0.000000  0.000000  -0.000000)
(0.000000  0.000000  -0.000000)
(0.000000  0.000000  -0.000000)
(0.000000  0.000000  -0.000000)
(0.000000  0.000000  -0.000000)
(0.000000  0.000000  -0.000000)
(0.000000  0.000000  -0.000000)
(0.000000  0.000000  -0.000000)
(0.000000  0.000000  -0.000000)
(0.000000  0.000000  -0.000000)
(0.000000  0.000000  -0.000000)
(0.000000  0.000000  -0.000000)
(0.000000  0.000000  -0.000000)
(0.000000  0.000000  -0.000000)
(0.000000  0.000000  -0.000000)
(0.000000  0.000000  -0.000000)
(0.000000  0.000000  -0.000000)
(0.000000  0.000000  -0.000000)
(0.000000  0.000000  -0.000000)
(0.000000  0.000000  -0.000000)
(0.000000  0.000000  -0.000000)
(0.000000  0.000000  -0.000000)
(0.000000  0.000000  -0.000000)
(0.000000  0.000000  -0.000000)
(0.000000  0.000000  -0.000000)
(0.000000  0.000000  -0.000000)
(0.000000  0.000000  -0.000000)
(0.000000  0.000000  -0.000000)
(0.000000  0.000000  -0.000000)
(0.000000  0.000000  -0.000000)
(0.000000  0.000000  -0.000000)
(0.000000  0.000000  -0.000000)
(0.000000  0.000000  -0.000000)
(0.000000  0.000000  -0.000000)
(0.000000  0.000000  -0.000000)
(0.000000  0.000000  -0.000000)
(0.000000  0.000000  -0.000000)
(0.000000  0.000000  -0.000000)
(0.000000  0.000000  -0.000000)
(0.000000  0.000000  -0.000000)
(0.000000  0.000000  -0.000000)
(0.000000  0.000000  -0.000000)
(0.000000  0.000000  -0.000000)
(0.000000  0.000000  -0.000000)
(0.000000  0.000000  -0.000000)
(0.000000  0.000000  -0.000000)
(0.000000  0.000000  -0.000000)
(0.000000  0.000000  -0.000000)
(0.000000  0.000000  -0.000000)
(0.000000  0.000000  -0.000000)
(0.000000  0.000000  -0.000000)
(0.000000  0.000000  -0.000000)
(0.000000  0.000000  -0.000000)
(0.000000  0.000000  -0.000000)
(0.000000  0.000000  -0.000000)
(0.000000  0.000000  -0.000000)
(0.000000  0.000000  -0.000000)
(0.000000  0.000000  -0.000000)
(0.000000  0.000000  -0.000000)
(0.000000  0.000000  -0.000000)
(0.000000  0.000000  -0.000000)
(0.000000  0.000000  -0.000000)
(0.000000  0.000000  -0.000000)
(0.000000  0.000000  -0.000000)
(0.000000  0.000000  -0.000000)
(0.000000  0.000000  -0.000000)
(0.000000  0.000000  -0.000000)
(0.000000  0.000000  -0.000000)
(0.000000  0.000000  -0.000000)
(0.000000  0.000000  -0.000000)
(0.000000  0.000000  -0.000000)
(0.000000  0.000000  -0.000000)
(0.000000  0.000000  -0.000000)
(0.000000  0.000000  -0.000000)
(0.000000  0.000000  -0.000000)
(0.000000  0.000000  -0.000000)
(0.000000  0.000000  -0.000000)
(0.000000  0.000000  -0.000000)
(0.000000  0.000000  -0.000000)
(0.000000  0.000000  -0.000000)
(0.000000  0.000000  -0.000000)
(0.000000  0.000000  -0.000000)
(0.000000  0.000000  -0.000000)
(0.000000  0.000000  -0.000000)
(0.000000  0.000000  -0.000000)
(0.000000  0.000000  -0.000000)
(0.000000  0.000000  -0.000000)
(0.000000  0.000000  -0.000000)
(0.000000  0.000000  -0.000000)
(0.000000  0.000000  -0.000000)
(0.000000  0.000000  -0.000000)
(0.000000  0.000000  -0.000000)
(0.000000  0.000000  -0.000000)
(0.000000  0.000000  -0.000000)
(0.000000  0.000000  -0.000000)
(0.000000  0.000000  -0.000000)
(0.000000  0.000000  -0.000000)
(0.000000  0.000000  -0.000000)
(0.000000  0.000000  -0.000000)
(0.000000  0.000000  -0.000000)
(0.000000  0.000000  -0.000000)
(0.000000  0.000000  -0.000000)
(0.000000  0.000000  -0.000000)
(0.000000  0.000000  -0.000000)
(0.000000  0.000000  -0.000000)
(0.000000  0.000000  -0.000000)
(0.000000  0.000000  -0.000000)
(0.000001  0.000000  -0.000000)
(0.000001  0.000000  -0.000000)
(0.000001  0.000000  -0.000000)
(0.000001  0.000000  -0.000000)
(0.000001  0.000000  -0.000000)
(0.000001  0.000000  -0.000000)
(0.000001  0.000000  -0.000000)
(0.000001  0.000000  -0.000000)
(0.000001  0.000000  -0.000000)
(0.000001  0.000000  -0.000000)
(0.000001  0.000000  -0.000000)
(0.000001  0.000000  -0.000000)
(0.000001  0.000000  -0.000000)
(0.000001  0.000000  -0.000000)
(0.000002  0.000000  -0.000000)
(0.000002  0.000000  -0.000000)
(0.000002  0.000000  -0.000000)
(0.000002  0.000000  -0.000000)
(0.000002  0.000000  -0.000000)
(0.000002  0.000000  -0.000000)
(0.000003  0.000000  -0.000000)
(0.000003  0.000000  -0.000000)
(0.000003  0.000000  -0.000000)
(0.000003  0.000000  -0.000000)
(0.000004  0.000000  -0.000000)
(0.000004  0.000000  -0.000000)
(0.000004  0.000000  -0.000000)
(0.000005  0.000000  -0.000000)
(0.000005  0.000000  -0.000000)
(0.000005  0.000000  -0.000000)
(0.000006  0.000000  -0.000001)
(0.000006  0.000000  -0.000001)
(0.000007  0.000000  -0.000001)
(0.000008  0.000000  -0.000001)
(0.000008  0.000000  -0.000001)
(0.000009  0.000000  -0.000001)
(0.000010  0.000000  -0.000001)
(0.000011  0.000000  -0.000001)
(0.000011  0.000000  -0.000001)
(0.000012  0.000000  -0.000001)
(0.000013  0.000000  -0.000001)
(0.000015  0.000000  -0.000001)
(0.000016  0.000000  -0.000001)
(0.000017  0.000000  -0.000001)
(0.000019  0.000000  -0.000002)
(0.000020  0.000000  -0.000002)
(0.000022  0.000000  -0.000002)
(0.000024  0.000000  -0.000002)
(0.000026  0.000000  -0.000002)
(0.000028  0.000000  -0.000002)
(0.000030  0.000000  -0.000003)
(0.000033  0.000000  -0.000003)
(0.000036  0.000000  -0.000003)
(0.000039  0.000000  -0.000003)
(0.000042  0.000000  -0.000004)
(0.000046  0.000000  -0.000004)
(0.000050  0.000000  -0.000004)
(0.000054  0.000000  -0.000005)
(0.000058  0.000000  -0.000005)
(0.000063  0.000000  -0.000006)
(0.000069  0.000000  -0.000006)
(0.000075  0.000000  -0.000006)
(0.000081  0.000000  -0.000007)
(0.000088  0.000000  -0.000008)
(0.000095  0.000000  -0.000008)
(0.000103  0.000000  -0.000009)
(0.000112  0.000000  -0.000010)
(0.000122  0.000000  -0.000011)
(0.000132  0.000000  -0.000011)
(0.000143  0.000000  -0.000012)
(0.000155  0.000000  -0.000013)
(0.000169  0.000000  -0.000015)
(0.000183  0.000000  -0.000016)
(0.000198  0.000000  -0.000017)
(0.000215  0.000000  -0.000019)
(0.000233  0.000000  -0.000020)
(0.000253  0.000000  -0.000022)
(0.000274  0.000000  -0.000024)
(0.000298  0.000000  -0.000026)
(0.000323  0.000000  -0.000028)
(0.000350  0.000000  -0.000030)
(0.000379  0.000000  -0.000033)
(0.000411  0.000000  -0.000035)
(0.000446  0.000000  -0.000038)
(0.000483  0.000000  -0.000041)
(0.000523  0.000000  -0.000045)
(0.000567  0.000000  -0.000049)
(0.000615  0.000000  -0.000052)
(0.000666  0.000000  -0.000057)
(0.000721  0.000000  -0.000061)
(0.000781  0.000000  -0.000066)
(0.000846  0.000000  -0.000072)
(0.000916  0.000000  -0.000078)
(0.000992  0.000000  -0.000084)
(0.001074  0.000000  -0.000090)
(0.001162  0.000000  -0.000098)
(0.001257  0.000000  -0.000105)
(0.001360  0.000000  -0.000114)
(0.001471  0.000000  -0.000122)
(0.001590  0.000000  -0.000132)
(0.001719  0.000000  -0.000142)
(0.001858  0.000000  -0.000153)
(0.002007  0.000000  -0.000165)
(0.002167  0.000000  -0.000177)
(0.002340  0.000000  -0.000190)
(0.002525  0.000000  -0.000204)
(0.002723  0.000000  -0.000219)
(0.002937  0.000000  -0.000235)
(0.003165  0.000000  -0.000251)
(0.003410  0.000000  -0.000269)
(0.003671  0.000000  -0.000288)
(0.003951  0.000000  -0.000307)
(0.004249  0.000000  -0.000328)
(0.004568  0.000000  -0.000350)
(0.004907  0.000000  -0.000372)
(0.005268  0.000000  -0.000396)
(0.005651  0.000000  -0.000420)
(0.006058  0.000000  -0.000446)
(0.006490  0.000000  -0.000472)
(0.006946  0.000000  -0.000499)
(0.007429  0.000000  -0.000527)
(0.007937  0.000000  -0.000555)
(0.008473  0.000000  -0.000584)
(0.009036  0.000000  -0.000613)
(0.009627  0.000000  -0.000642)
(0.010245  0.000000  -0.000672)
(0.010891  0.000000  -0.000701)
(0.011564  0.000000  -0.000730)
(0.012265  0.000000  -0.000758)
(0.012992  0.000000  -0.000785)
(0.013744  0.000000  -0.000812)
(0.014520  0.000000  -0.000836)
(0.015319  0.000000  -0.000859)
(0.016138  0.000000  -0.000880)
(0.016977  0.000000  -0.000899)
(0.017831  0.000000  -0.000915)
(0.018700  0.000000  -0.000928)
(0.019579  0.000000  -0.000937)
(0.020466  0.000000  -0.000943)
(0.021356  0.000000  -0.000945)
(0.022247  0.000000  -0.000943)
(0.023133  0.000000  -0.000936)
(0.024011  0.000000  -0.000925)
(0.024876  0.000000  -0.000909)
(0.025724  0.000000  -0.000888)
(0.026549  0.000000  -0.000861)
(0.027347  0.000000  -0.000830)
(0.028114  0.000000  -0.000794)
(0.028843  0.000000  -0.000752)
(0.029531  0.000000  -0.000706)
(0.030173  0.000000  -0.000655)
(0.030765  0.000000  -0.000599)
(0.031302  0.000000  -0.000539)
(0.031781  0.000000  -0.000475)
(0.032199  0.000000  -0.000408)
(0.032551  0.000000  -0.000338)
(0.032837  0.000000  -0.000266)
(0.033053  0.000000  -0.000191)
(0.033197  0.000000  -0.000115)
(0.033270  0.000000  -0.000039)
(0.033270  0.000000  0.000039)
(0.033197  0.000000  0.000115)
(0.033053  0.000000  0.000191)
(0.032837  0.000000  0.000266)
(0.032551  0.000000  0.000338)
(0.032199  0.000000  0.000408)
(0.031781  0.000000  0.000475)
(0.031302  0.000000  0.000539)
(0.030765  0.000000  0.000599)
(0.030173  0.000000  0.000655)
(0.029531  0.000000  0.000706)
(0.028843  0.000000  0.000752)
(0.028114  0.000000  0.000794)
(0.027347  0.000000  0.000830)
(0.026549  0.000000  0.000861)
(0.025724  0.000000  0.000888)
(0.024876  0.000000  0.000909)
(0.024011  0.000000  0.000925)
(0.023133  0.000000  0.000936)
(0.022247  0.000000  0.000943)
(0.021356  0.000000  0.000945)
(0.020466  0.000000  0.000943)
(0.019579  0.000000  0.000937)
(0.018700  0.000000  0.000928)
(0.017831  0.000000  0.000915)
(0.016977  0.000000  0.000899)
(0.016138  0.000000  0.000880)
(0.015319  0.000000  0.000859)
(0.014520  0.000000  0.000836)
(0.013744  0.000000  0.000812)
(0.012992  0.000000  0.000785)
(0.012265  0.000000  0.000758)
(0.011564  0.000000  0.000730)
(0.010891  0.000000  0.000701)
(0.010245  0.000000  0.000672)
(0.009626  0.000000  0.000642)
(0.009036  0.000000  0.000613)
(0.008473  0.000000  0.000584)
(0.007937  0.000000  0.000555)
(0.007429  0.000000  0.000527)
(0.006946  0.000000  0.000499)
(0.006490  0.000000  0.000472)
(0.006058  0.000000  0.000446)
(0.005651  0.000000  0.000420)
(0.005268  0.000000  0.000396)
(0.004907  0.000000  0.000372)
(0.004568  0.000000  0.000350)
(0.004249  0.000000  0.000328)
(0.003951  0.000000  0.000307)
(0.003671  0.000000  0.000288)
(0.003410  0.000000  0.000269)
(0.003165  0.000000  0.000251)
(0.002937  0.000000  0.000235)
(0.002723  0.000000  0.000219)
(0.002525  0.000000  0.000204)
(0.002340  0.000000  0.000190)
(0.002167  0.000000  0.000177)
(0.002007  0.000000  0.000165)
(0.001858  0.000000  0.000153)
(0.001719  0.000000  0.000142)
(0.001590  0.000000  0.000132)
(0.001471  0.000000  0.000122)
(0.001360  0.000000  0.000114)
(0.001257  0.000000  0.000105)
(0.001162  0.000000  0.000098)
(0.001074  0.000000  0.000090)
(0.000992  0.000000  0.000084)
(0.000916  0.000000  0.000078)
(0.000846  0.000000  0.000072)
(0.000781  0.000000  0.000066)
(0.000721  0.000000  0.000061)
(0.000666  0.000000  0.000057)
(0.000615  0.000000  0.000052)
(0.000567  0.000000  0.000049)
(0.000523  0.000000  0.000045)
(0.000483  0.000000  0.000041)
(0.000446  0.000000  0.000038)
(0.000411  0.000000  0.000035)
(0.000379  0.000000  0.000033)
(0.000350  0.000000  0.000030)
(0.000323  0.000000  0.000028)
(0.000298  0.000000  0.000026)
(0.000274  0.000000  0.000024)
(0.000253  0.000000  0.000022)
(0.000233  0.000000  0.000020)
(0.000215  0.000000  0.000019)
(0.000198  0.000000  0.000017)
(0.000183  0.000000  0.000016)
(0.000169  0.000000  0.000015)
(0.000155  0.000000  0.000013)
(0.000143  0.000000  0.000012)
(0.000132  0.000000  0.000011)
(0.000122  0.000000  0.000011)
(0.000112  0.000000  0.000010)
(0.000103  0.000000  0.000009)
(0.000095  0.000000  0.000008)
(0.000088  0.000000  0.000008)
(0.000081  0.000000  0.000007)
(0.000075  0.000000  0.000006)
(0.000069  0.000000  0.000006)
(0.000063  0.000000  0.000006)
(0.000058  0.000000  0.000005)
(0.000054  0.000000  0.000005)
(0.000050  0.000000  0.000004)
(0.000046  0.000000  0.000004)
(0.000042  0.000000  0.000004)
(0.000039  0.000000  0.000003)
(0.000036  0.000000  0.000003)
(0.000033  0.000000  0.000003)
(0.000030  0.000000  0.000003)
(0.000028  0.000000  0.000002)
(0.000026  0.000000  0.000002)
(0.000024  0.000000  0.000002)
(0.000022  0.000000  0.000002)
(0.000020  0.000000  0.000002)
(0.000019  0.000000  0.000002)
(0.000017  0.000000  0.000001)
(0.000016  0.000000  0.000001)
(0.000015  0.000000  0.000001)
(0.000013  0.000000  0.000001)
(0.000012  0.000000  0.000001)
(0.000011  0.000000  0.000001)
(0.000011  0.000000  0.000001)
(0.000010  0.000000  0.000001)
(0.000009  0.000000  0.000001)
(-0.000000  0.000000  0.000000)
(-0.000000  0.000000  -0.000000)
(-0.000000  0.000000  -0.000000)
(-0.000000  0.000000  0.000000)
(-0.000000  0.000000  -0.000000)
(-0.000000  0.000000  0.000000)
(-0.000000  0.000000  -0.000000)
(-0.000000  0.000000  0.000000)
(-0.000000  0.000000  -0.000000)
(-0.000000  0.000000  0.000000)
(-0.000000  0.000000  -0.000000)
(-0.000000  0.000000  0.000000)
(-0.000000  0.000000  0.000000)
(-0.000000  0.000000  -0.000000)
(-0.000000  0.000000  -0.000000)
(-0.000000  0.000000  0.000000)
(-0.000000  0.000000  0.000000)
(-0.000000  0.000000  0.000000)
(-0.000000  0.000000  -0.000000)
(-0.000000  0.000000  0.000000)
(-0.000000  0.000000  -0.000000)
(-0.000000  0.000000  0.000000)
(-0.000000  0.000000  -0.000000)
(-0.000000  0.000000  0.000000)
(-0.000000  0.000000  -0.000000)
(-0.000000  0.000000  0.000000)
(-0.000000  0.000000  0.000000)
(-0.000000  0.000000  0.000000)
(-0.000000  0.000000  -0.000000)
(-0.000000  0.000000  0.000000)
(-0.000000  0.000000  -0.000000)
(-0.000000  0.000000  0.000000)
(-0.000000  0.000000  -0.000000)
(-0.000000  0.000000  -0.000000)
(-0.000000  0.000000  -0.000000)
(-0.000000  0.000000  0.000000)
(-0.000000  0.000000  -0.000000)
(-0.000000  0.000000  -0.000000)
(-0.000000  0.000000  -0.000000)
(-0.000000  0.000000  0.000000)
(-0.000000  0.000000  -0.000000)
(-0.000000  0.000000  0.000000)
(-0.000000  0.000000  -0.000000)
(-0.000000  0.000000  0.000000)
(-0.000000  0.000000  -0.000000)
(-0.000000  0.000000  0.000000)
(-0.000000  0.000000  -0.000000)
(-0.000000  0.000000  0.000000)
(-0.000000  0.000000  -0.000000)
(-0.000000  0.000000  0.000000)
(-0.000000  0.000000  -0.000000)
(-0.000000  0.000000  0.000000)
(-0.000000  0.000000  -0.000000)
(-0.000000  0.000000  -0.000000)
(-0.000000  0.000000  -0.000000)
(-0.000000  0.000000  0.000000)
(-0.000000  0.000000  -0.000000)
(-0.000000  0.000000  0.000000)
(-0.000000  0.000000  -0.000000)
(-0.000000  0.000000  0.000000)
(-0.000000  0.000000  -0.000000)
(-0.000000  0.000000  0.000000)
(-0.000000  0.000000  -0.000000)
(-0.000000  0.000000  0.000000)
(-0.000000  0.000000  -0.000000)
(-0.000000  0.000000  0.000000)
(-0.000000  0.000000  -0.000000)
(0.000000  0.000000  0.000000)
(-0.000000  0.000000  -0.000000)
(-0.000000  0.000000  0.000000)
(-0.000000  0.000000  -0.000000)
(-0.000000  0.000000  0.000000)
(-0.000000  0.000000  0.000000)
(-0.000000  0.000000  -0.000000)
(-0.000000  0.000000  -0.000000)
(-0.000000  0.000000  0.000000)
(-0.000000  0.000000  -0.000000)
(-0.000000  0.000000  -0.000000)
(-0.000000  0.000000  -0.000000)
(-0.000000  0.000000  -0.000000)
(-0.000000  0.000000  0.000000)
(0.000000  0.000000  0.000000)
(0.000000  0.000000  -0.000000)
(0.000000  0.000000  0.000000)
(-0.000000  0.000000  -0.000000)
(-0.000000  0.000000  0.000000)
(-0.000000  0.000000  0.000000)
(0.000000  0.000000  0.000000)
(-0.000000  0.000000  -0.000000)
(-0.000000  0.000000  -0.000000)
(0.000000  0.000000  0.000000)
(-0.000000  0.000000  0.000000)
(-0.000000  0.000000  -0.000000)
(-0.000000  0.000000  0.000000)
(-0.000000  0.000000  -0.000000)
(-0.000000  0.000000  0.000000)
(-0.000000  0.000000  -0.000000)
(-0.000000  0.000000  0.000000)
(-0.000000  0.000000  -0.000000)
(-0.000000  0.000000  0.000000)
(-0.000000  0.000000  -0.000000)
(-0.000000  0.000000  0.000000)
(-0.000000  0.000000  -0.000000)
(-0.000000  0.000000  0.000000)
(-0.000000  0.000000  -0.000000)
(-0.000000  0.000000  0.000000)
(-0.000000  0.000000  -0.000000)
(-0.000000  0.000000  0.000000)
(-0.000000  0.000000  -0.000000)
(-0.000000  0.000000  -0.000000)
(-0.000000  0.000000  -0.000000)
(-0.000000  0.000000  0.000000)
(-0.000000  0.000000  -0.000000)
(-0.000000  0.000000  0.000000)
(-0.000000  0.000000  -0.000000)
(-0.000000  0.000000  0.000000)
(-0.000000  0.000000  -0.000000)
(-0.000000  0.000000  0.000000)
(-0.000000  0.000000  -0.000000)
(-0.000000  0.000000  -0.000000)
(-0.000000  0.000000  0.000000)
(-0.000000  0.000000  -0.000000)
(-0.000000  0.000000  0.000000)
(-0.000000  0.000000  -0.000000)
(-0.000000  0.000000  0.000000)
(-0.000000  0.000000  -0.000000)
(-0.000000  0.000000  0.000000)
(-0.000000  0.000000  0.000000)
(-0.000000  0.000000  -0.000000)
(-0.000000  0.000000  -0.000000)
(-0.000000  0.000000  0.000000)
(-0.000000  0.000000  0.000000)
(-0.000000  0.000000  -0.000000)
(-0.000000  0.000000  0.000000)
(-0.000000  0.000000  -0.000000)
(-0.000000  0.000000  0.000000)
(-0.000000  0.000000  -0.000000)
(-0.000000  0.000000  0.000000)
(-0.000000  0.000000  -0.000000)
(-0.000000  0.000000  -0.000000)
(-0.000000  0.000000  -0.000000)
(-0.000000  0.000000  0.000000)
(-0.000000  0.000000  -0.000000)
(-0.000000  0.000000  0.000000)
(-0.000000  0.000000  0.000000)
(-0.000000  0.000000  -0.000000)
(-0.000000  0.000000  0.000000)
(-0.000000  0.000000  -0.000000)
(-0.000000  0.000000  -0.000000)
(-0.000000  0.000000  0.000000)
(-0.000000  0.000000  -0.000000)
(-0.000000  0.000000  0.000000)
(-0.000000  0.000000  -0.000000)
(-0.000000  0.000000  -0.000000)
(-0.000000  0.000000  -0.000000)
(-0.000000  0.000000  0.000000)
(-0.000000  0.000000  0.000000)
(-0.000000  0.000000  0.000000)
(-0.000000  0.000000  0.000000)
(-0.000000  0.000000  -0.000000)
(-0.000000  0.000000  -0.000000)
(-0.000000  0.000000  0.000000)
(-0.000000  0.000000  -0.000000)
(-0.000000  0.000000  0.000000)
(-0.000000  0.000000  -0.000000)
(-0.000000  0.000000  -0.000000)
(-0.000000  0.000000  0.000000)
(-0.000000  0.000000  0.000000)
(-0.000000  0.000000  -0.000000)
(-0.000000  0.000000  0.000000)
(-0.000000  0.000000  -0.000000)
(-0.000000  0.000000  0.000000)
(-0.000000  0.000000  -0.000000)
(-0.000000  0.000000  0.000000)
(-0.000000  0.000000  -0.000000)
(0.000000  0.000000  0.000000)
(0.000000  0.000000  -0.000000)
(0.000000  0.000000  0.000000)
(0.000000  0.000000  -0.000000)
(0.000000  0.000000  0.000000)
(0.000000  0.000000  -0.000000)
(0.000000  0.000000  -0.000000)
(0.000000  0.000000  -0.000000)
(0.000000  0.000000  0.000000)
(0.000000  0.000000  -0.000000)
(0.000000  0.000000  -0.000000)
(0.000000  0.000000  -0.000000)
(0.000000  0.000000  -0.000000)
(0.000000  0.000000  -0.000000)
(0.000000  0.000000  -0.000000)
(0.000000  0.000000  -0.000000)
(0.000000  0.000000  -0.000000)
(0.000000  0.000000  -0.000000)
(0.000000  0.000000  -0.000000)
(0.000000  0.000000  -0.000000)
(0.000000  0.000000  -0.000000)
(0.000000  0.000000  -0.000000)
(0.000000  0.000000  -0.000000)
(0.000000  0.000000  -0.000000)
(0.000000  0.000000  -0.000000)
(0.000000  0.000000  -0.000000)
(0.000000  0.000000  -0.000000)
(0.000000  0.000000  -0.000000)
(0.000000  0.000000  -0.000000)
(0.000000  0.000000  -0.000000)
(0.000000  0.000000  -0.000000)
(0.000000  0.000000  -0.000000)
(0.000000  0.000000  -0.000000)
(0.000000  0.000000  -0.000000)
(0.000000  0.000000  -0.000000)
(0.000000  0.000000  -0.000000)
(0.000000  0.000000  -0.000000)
(0.000000  0.000000  -0.000000)
(0.000000  0.000000  -0.000000)
(0.000000  0.000000  -0.000000)
(0.000000  0.000000  -0.000000)
(0.000000  0.000000  -0.000000)
(0.000000  0.000000  -0.000000)
(0.000000  0.000000  -0.000000)
(0.000000  0.000000  -0.000000)
(0.000000  0.000000  -0.000000)
(0.000000  0.000000  -0.000000)
(0.000000  0.000000  -0.000000)
(0.000000  0.000000  -0.000000)
(0.000000  0.000000  -0.000000)
(0.000000  0.000000  -0.000000)
(0.000000  0.000000  -0.000000)
(0.000000  0.000000  -0.000000)
(0.000000  0.000000  -0.000000)
(0.000000  0.000000  -0.000000)
(0.000000  0.000000  -0.000000)
(0.000000  0.000000  -0.000000)
(0.000000  0.000000  -0.000000)
(0.000000  0.000000  -0.000000)
(0.000000  0.000000  -0.000000)
(0.000000  0.000000  -0.000000)
(0.000000  0.000000  -0.000000)
(0.000000  0.000000  -0.000000)
(0.000000  0.000000  -0.000000)
(0.000000  0.000000  -0.000000)
(0.000000  0.000000  -0.000000)
(0.000000  0.000000  -0.000000)
(0.000000  0.000000  -0.000000)
(0.000000  0.000000  -0.000000)
(0.000000  0.000000  -0.000000)
(0.000000  0.000000  -0.000000)
(0.000000  0.000000  -0.000000)
(0.000000  0.000000  -0.000000)
(0.000000  0.000000  -0.000000)
(0.000000  0.000000  -0.000000)
(0.000000  0.000000  -0.000000)
(0.000000  0.000000  -0.000000)
(0.000000  0.000000  -0.000000)
(0.000000  0.000000  -0.000000)
(0.000000  0.000000  -0.000000)
(0.000000  0.000000  -0.000000)
(0.000000  0.000000  -0.000000)
(0.000000  0.000000  -0.000000)
(0.000000  0.000000  -0.000000)
(0.000000  0.000000  -0.000000)
(0.000000  0.000000  -0.000000)
(0.000000  0.000000  -0.000000)
(0.000000  0.000000  -0.000000)
(0.000000  0.000000  -0.000000)
(0.000000  0.000000  -0.000000)
(0.000000  0.000000  -0.000000)
(0.000000  0.000000  -0.000000)
(0.000000  0.000000  -0.000000)
(0.000000  0.000000  -0.000000)
(0.000000  0.000000  -0.000000)
(0.000000  0.000000  -0.000000)
(0.000000  0.000000  -0.000000)
(0.000000  0.000000  -0.000000)
(0.000000  0.000000  -0.000000)
(0.000000  0.000000  -0.000000)
(0.000000  0.000000  -0.000000)
(0.000000  0.000000  -0.000000)
(0.000000  0.000000  -0.000000)
(0.000000  0.000000  -0.000000)
(0.000000  0.000000  -0.000000)
(0.000000  0.000000  -0.000000)
(0.000000  0.000000  -0.000000)
(0.000000  0.000000  -0.000000)
(0.000000  0.000000  -0.000000)
(0.000000  0.000000  -0.000000)
(0.000000  0.000000  -0.000000)
(0.000000  0.000000  -0.000000)
(0.000000  0.000000  -0.000000)
(0.000000  0.000000  -0.000000)
(0.000000  0.000000  -0.000000)
(0.000000  0.000000  -0.000000)
(0.000000  0.000000  -0.000000)
(0.000000  0.000000  -0.000000)
(0.000000  0.000000  -0.000000)
(0.000000  0.000000  -0.000000)
(0.000000  0.000000  -0.000000)
(0.000000  0.000000  -0.000000)
(0.000000  0.000000  -0.000000)
(0.000000  0.000000  -0.000000)
(0.000000  0.000000  -0.000000)
(0.000000  0.000000  -0.000000)
(0.000000  0.000000  -0.000000)
(0.000000  0.000000  -0.000000)
(0.000000  0.000000  -0.000000)
(0.000000  0.000000  -0.000000)
(0.000000  0.000000  -0.000000)
(0.000000  0.000000  -0.000000)
(0.000000  0.000000  -0.000000)
(0.000000  0.000000  -0.000000)
(0.000000  0.000000  -0.000000)
(0.000000  0.000000  -0.000000)
(0.000000  0.000000  -0.000000)
(0.000000  0.000000  -0.000000)
(0.000000  0.000000  -0.000000)
(0.000000  0.000000  -0.000000)
(0.000000  0.000000  -0.000000)
(0.000000  0.000000  -0.000000)
(0.000000  0.000000  -0.000000)
(0.000000  0.000000  -0.000000)
(0.000000  0.000000  -0.000000)
(0.000000  0.000000  -0.000000)
(0.000000  0.000000  -0.000000)
(0.000000  0.000000  -0.000000)
(0.000000  0.000000  -0.000000)
(0.000000  0.000000  -0.000000)
(0.000000  0.000000  -0.000000)
(0.000000  0.000000  -0.000000)
(0.000000  0.000000  -0.000000)
(0.000000  0.000000  -0.000000)
(0.000000  0.000000  -0.000000)
(0.000000  0.000000  -0.000000)
(0.000000  0.000000  -0.000000)
(0.000000  0.000000  -0.000000)
(0.000000  0.000000  -0.000000)
(0.000000  0.000000  -0.000000)
(0.000000  0.000000  -0.000000)
(0.000000  0.000000  -0.000000)
(0.000000  0.000000  -0.000000)
(0.000000  0.000000  -0.000000)
(0.000000  0.000000  -0.000000)
(0.000000  0.000000  -0.000000)
(0.000000  0.000000  -0.000000)
(0.000000  0.000000  -0.000000)
(0.000000  0.000000  -0.000000)
(0.000000  0.000000  -0.000000)
(0.000000  0.000000  -0.000000)
(0.000000  0.000000  -0.000000)
(0.000000  0.000000  -0.000000)
(0.000000  0.000000  -0.000000)
(0.000000  0.000000  -0.000000)
(0.000000  0.000000  -0.000000)
(0.000000  0.000000  -0.000000)
(0.000000  0.000000  -0.000000)
(0.000000  0.000000  -0.000000)
(0.000000  0.000000  -0.000000)
(0.000000  0.000000  -0.000000)
(0.000000  0.000000  -0.000000)
(0.000000  0.000000  -0.000000)
(0.000000  0.000000  -0.000000)
(0.000000  0.000000  -0.000000)
(0.000000  0.000000  -0.000000)
(0.000000  0.000000  -0.000000)
(0.000000  0.000000  -0.000000)
(0.000000  0.000000  -0.000000)
(0.000000  0.000000  -0.000000)
(0.000000  0.000000  -0.000000)
(0.000000  0.000000  -0.000000)
(0.000000  0.000000  -0.000000)
(0.000000  0.000000  -0.000000)
(0.000000  0.000000  -0.000000)
(0.000000  0.000000  -0.000000)
(0.000000  0.000000  -0.000000)
(0.000000  0.000000  -0.000000)
(0.000000  0.000000  -0.000000)
(0.000000  0.000000  -0.000000)
(0.000000  0.000000  -0.000000)
(0.000000  0.000000  -0.000000)
(0.000000  0.000000  -0.000000)
(0.000000  0.000000  -0.000000)
(0.000000  0.000000  -0.000000)
(0.000000  0.000000  -0.000000)
(0.000000  0.000000  -0.000000)
(0.000000  0.000000  -0.000000)
(0.000000  0.000000  -0.000000)
(0.000000  0.000000  -0.000000)
(0.000000  0.000000  -0.000000)
(0.000000  0.000000  -0.000000)
(0.000000  0.000000  -0.000000)
(0.000000  0.000000  -0.000000)
(0.000000  0.000000  -0.000000)
(0.000000  0.000000  -0.000000)
(0.000000  0.000000  -0.000000)
(0.000000  0.000000  -0.000000)
(0.000000  0.000000  -0.000000)
(0.000000  0.000000  -0.000000)
(0.000000  0.000000  -0.000000)
(0.000000  0.000000  -0.000000)
(0.000000  0.000000  -0.000000)
(0.000000  0.000000  -0.000000)
(0.000000  0.000000  -0.000000)
(0.000000  0.000000  -0.000000)
(0.000000  0.000000  -0.000000)
(0.000000  0.000000  -0.000000)
(0.000000  0.000000  -0.000000)
(0.000000  0.000000  -0.000000)
(0.000000  0.000000  -0.000000)
(0.000000  0.000000  -0.000000)
(0.000000  0.000000  -0.000000)
(0.000000  0.000000  -0.000000)
(0.000000  0.000000  -0.000000)
(0.000000  0.000000  -0.000000)
(0.000000  0.000000  -0.000000)
(0.000000  0.000000  -0.000000)
(0.000000  0.000000  -0.000000)
(0.000000  0.000000  -0.000000)
(0.000000  0.000000  -0.000000)
(0.000000  0.000000  -0.000000)
(0.000000  0.000000  -0.000000)
(0.000000  0.000000  -0.000000)
(0.000000  0.000000  -0.000000)
(0.000000  0.000000  -0.000000)
(0.000000  0.000000  -0.000000)
(0.000000  0.000000  -0.000000)
(0.000000  0.000000  -0.000000)
(0.000000  0.000000  -0.000000)
(0.000000  0.000000  -0.000000)
(0.000000  0.000000  -0.000000)
(0.000000  0.000000  -0.000000)
(0.000000  0.000000  -0.000000)
(0.000000  0.000000  -0.000000)
(0.000000  0.000000  -0.000000)
(0.000000  0.000000  -0.000000)
(0.000000  0.000000  -0.000000)
(0.000000  0.000000  -0.000000)
(0.000000  0.000000  -0.000000)
(0.000000  0.000000  -0.000000)
(0.000000  0.000000  -0.000000)
(0.000000  0.000000  -0.000000)
(0.000000  0.000000  -0.000000)
(0.000000  0.000000  -0.000000)
(0.000000  0.000000  -0.000000)
(0.000000  0.000000  -0.000000)
(0.000000  0.000000  -0.000000)
(0.000000  0.000000  -0.000000)
(0.000000  0.000000  -0.000000)
(0.000000  0.000000  -0.000000)
(0.000000  0.000000  -0.000000)
(0.000000  0.000000  -0.000000)
(0.000000  0.000000  -0.000000)
(0.000000  0.000000  -0.000000)
(0.000000  0.000000  -0.000000)
(0.000000  0.000000  -0.000000)
(0.000000  0.000000  -0.000000)
(0.000000  0.000000  -0.000000)
(0.000000  0.000000  -0.000000)
(0.000000  0.000000  -0.000000)
(0.000000  0.000000  -0.000000)
(0.000000  0.000000  -0.000000)
(0.000000  0.000000  -0.000000)
(0.000000  0.000000  -0.000000)
(0.000000  0.000000  -0.000000)
(0.000000  0.000000  -0.000000)
(0.000000  0.000000  -0.000000)
(0.000000  0.000000  -0.000000)
(0.000000  0.000000  -0.000000)
(0.000001  0.000000  -0.000000)
(0.000001  0.000000  -0.000000)
(0.000001  0.000000  -0.000000)
(0.000001  0.000000  -0.000000)
(0.000001  0.000000  -0.000000)
(0.000001  0.000000  -0.000000)
(0.000001  0.000000  -0.000000)
(0.000001  0.000000  -0.000000)
(0.000001  0.000000  -0.000000)
(0.000001  0.000000  -0.000000)
(0.000001  0.000000  -0.000000)
(0.000001  0.000000  -0.000000)
(0.000001  0.000000  -0.000000)
(0.000001  0.000000  -0.000000)
(0.000002  0.000000  -0.000000)
(0.000002  0.000000  -0.000000)
(0.000002  0.000000  -0.000000)
(0.000002  0.000000  -0.000000)
(0.000002  0.000000  -0.000000)
(0.000002  0.000000  -0.000000)
(0.000003  0.000000  -0.000000)
(0.000003  0.000000  -0.000000)
(0.000003  0.000000  -0.000000)
(0.000003  0.000000  -0.000000)
(0.000004  0.000000  -0.000000)
(0.000004  0.000000  -0.000000)
(0.000004  0.000000  -0.000000)
(0.000005  0.000000  -0.000000)
(0.000005  0.000000  -0.000000)
(0.000005  0.000000  -0.000001)
(0.000006  0.000000  -0.000001)
(0.000006  0.000000  -0.000001)
(0.000007  0.000000  -0.000001)
(0.000008  0.000000  -0.000001)
(0.000008  0.000000  -0.000001)
(0.000009  0.000000  -0.000001)
(0.000010  0.000000  -0.000001)
(0.000011  0.000000  -0.000001)
(0.000011  0.000000  -0.000001)
(0.000012  0.000000  -0.000001)
(0.000013  0.000000  -0.000001)
(0.000015  0.000000  -0.000001)
(0.000016  0.000000  -0.000002)
(0.000017  0.000000  -0.000002)
(0.000019  0.000000  -0.000002)
(0.000020  0.000000  -0.000002)
(0.000022  0.000000  -0.000002)
(0.000024  0.000000  -0.000002)
(0.000026  0.000000  -0.000003)
(0.000028  0.000000  -0.000003)
(0.000030  0.000000  -0.000003)
(0.000033  0.000000  -0.000003)
(0.000036  0.000000  -0.000003)
(0.000039  0.000000  -0.000004)
(0.000042  0.000000  -0.000004)
(0.000046  0.000000  -0.000004)
(0.000050  0.000000  -0.000005)
(0.000054  0.000000  -0.000005)
(0.000058  0.000000  -0.000006)
(0.000063  0.000000  -0.000006)
(0.000069  0.000000  -0.000007)
(0.000075  0.000000  -0.000007)
(0.000081  0.000000  -0.000008)
(0.000088  0.000000  -0.000009)
(0.000095  0.000000  -0.000009)
(0.000103  0.000000  -0.000010)
(0.000112  0.000000  -0.000011)
(0.000122  0.000000  -0.000012)
(0.000132  0.000000  -0.000013)
(0.000143  0.000000  -0.000014)
(0.000155  0.000000  -0.000015)
(0.000168  0.000000  -0.000016)
(0.000183  0.000000  -0.000018)
(0.000198  0.000000  -0.000019)
(0.000215  0.000000  -0.000021)
(0.000233  0.000000  -0.000023)
(0.000253  0.000000  -0.000024)
(0.000274  0.000000  -0.000026)
(0.000297  0.000000  -0.000029)
(0.000322  0.000000  -0.000031)
(0.000349  0.000000  -0.000034)
(0.000379  0.000000  -0.000036)
(0.000411  0.000000  -0.000039)
(0.000445  0.000000  -0.000043)
(0.000483  0.000000  -0.000046)
(0.000523  0.000000  -0.000050)
(0.000567  0.000000  -0.000054)
(0.000614  0.000000  -0.000059)
(0.000665  0.000000  -0.000063)
(0.000721  0.000000  -0.000069)
(0.000781  0.000000  -0.000074)
(0.000845  0.000000  -0.000080)
(0.000915  0.000000  -0.000087)
(0.000991  0.000000  -0.000094)
(0.001073  0.000000  -0.000101)
(0.001161  0.000000  -0.000109)
(0.001256  0.000000  -0.000118)
(0.001359  0.000000  -0.000127)
(0.001470  0.000000  -0.000137)
(0.001589  0.000000  -0.000147)
(0.001718  0.000000  -0.000159)
(0.001856  0.000000  -0.000171)
(0.002005  0.000000  -0.000184)
(0.002165  0.000000  -0.000198)
(0.002338  0.000000  -0.000212)
(0.002523  0.000000  -0.000228)
(0.002721  0.000000  -0.000245)
(0.002934  0.000000  -0.000262)
(0.003163  0.000000  -0.000281)
(0.003407  0.000000  -0.000301)
(0.003669  0.000000  -0.000322)
(0.003948  0.000000  -0.000343)
(0.004247  0.000000  -0.000366)
(0.004565  0.000000  -0.000391)
(0.004904  0.000000  -0.000416)
(0.005265  0.000000  -0.000442)
(0.005648  0.000000  -0.000470)
(0.006055  0.000000  -0.000498)
(0.006486  0.000000  -0.000527)
(0.006943  0.000000  -0.000557)
(0.007425  0.000000  -0.000588)
(0.007933  0.000000  -0.000620)
(0.008469  0.000000  -0.000652)
(0.009032  0.000000  -0.000685)
(0.009623  0.000000  -0.000718)
(0.010241  0.000000  -0.000751)
(0.010887  0.000000  -0.000783)
(0.011561  0.000000  -0.000816)
(0.012261  0.000000  -0.000847)
(0.012988  0.000000  -0.000878)
(0.013740  0.000000  -0.000907)
(0.014517  0.000000  -0.000935)
(0.015316  0.000000  -0.000961)
(0.016136  0.000000  -0.000984)
(0.016974  0.000000  -0.001005)
(0.017829  0.000000  -0.001023)
(0.018698  0.000000  -0.001037)
(0.019578  0.000000  -0.001048)
(0.020465  0.000000  -0.001054)
(0.021356  0.000000  -0.001057)
(0.022247  0.000000  -0.001054)
(0.023134  0.000000  -0.001047)
(0.024013  0.000000  -0.001034)
(0.024879  0.000000  -0.001016)
(0.025727  0.000000  -0.000992)
(0.026553  0.000000  -0.000963)
(0.027352  0.000000  -0.000928)
(0.028119  0.000000  -0.000887)
(0.028849  0.000000  -0.000841)
(0.029538  0.000000  -0.000789)
(0.030180  0.000000  -0.000732)
(0.030773  0.000000  -0.000670)
(0.031310  0.000000  -0.000603)
(0.031790  0.000000  -0.000532)
(0.032208  0.000000  -0.000457)
(0.032561  0.000000  -0.000378)
(0.032846  0.000000  -0.000297)
(0.033062  0.000000  -0.000214)
(0.033207  0.000000  -0.000129)
(0.033280  0.000000  -0.000043)
(0.033280  0.000000  0.000043)
(0.033207  0.000000  0.000129)
(0.033062  0.000000  0.000214)
(0.032846  0.000000  0.000297)
(0.032561  0.000000  0.000378)
(0.032208  0.000000  0.000457)
(0.031790  0.000000  0.000532)
(0.031310  0.000000  0.000603)
(0.030773  0.000000  0.000670)
(0.030180  0.000000  0.000732)
(0.029538  0.000000  0.000789)
(0.028849  0.000000  0.000841)
(0.028119  0.000000  0.000887)
(0.027352  0.000000  0.000928)
(0.026553  0.000000  0.000963)
(0.025727  0.000000  0.000992)
(0.024879  0.000000  0.001016)
(0.024013  0.000000  0.001034)
(0.023134  0.000000  0.001047)
(0.022247  0.000000  0.001054)
(0.021356  0.000000  0.001057)
(0.020465  0.000000  0.001054)
(0.019578  0.000000  0.001048)
(0.018698  0.000000  0.001037)
(0.017829  0.000000  0.001023)
(0.016974  0.000000  0.001005)
(0.016136  0.000000  0.000984)
(0.015316  0.000000  0.000961)
(0.014517  0.000000  0.000935)
(0.013740  0.000000  0.000907)
(0.012988  0.000000  0.000878)
(0.012261  0.000000  0.000847)
(0.011561  0.000000  0.000816)
(0.010887  0.000000  0.000783)
(0.010241  0.000000  0.000751)
(0.009623  0.000000  0.000718)
(0.009032  0.000000  0.000685)
(0.008469  0.000000  0.000652)
(0.007933  0.000000  0.000620)
(0.007425  0.000000  0.000588)
(0.006943  0.000000  0.000557)
(0.006486  0.000000  0.000527)
(0.006055  0.000000  0.000498)
(0.005648  0.000000  0.000470)
(0.005265  0.000000  0.000442)
(0.004904  0.000000  0.000416)
(0.004565  0.000000  0.000391)
(0.004247  0.000000  0.000366)
(0.003948  0.000000  0.000343)
(0.003669  0.000000  0.000322)
(0.003407  0.000000  0.000301)
(0.003163  0.000000  0.000281)
(0.002934  0.000000  0.000262)
(0.002721  0.000000  0.000245)
(0.002523  0.000000  0.000228)
(0.002338  0.000000  0.000212)
(0.002165  0.000000  0.000198)
(0.002005  0.000000  0.000184)
(0.001856  0.000000  0.000171)
(0.001718  0.000000  0.000159)
(0.001589  0.000000  0.000147)
(0.001470  0.000000  0.000137)
(0.001359  0.000000  0.000127)
(0.001256  0.000000  0.000118)
(0.001161  0.000000  0.000109)
(0.001073  0.000000  0.000101)
(0.000991  0.000000  0.000094)
(0.000915  0.000000  0.000087)
(0.000845  0.000000  0.000080)
(0.000781  0.000000  0.000074)
(0.000721  0.000000  0.000069)
(0.000665  0.000000  0.000063)
(0.000614  0.000000  0.000059)
(0.000567  0.000000  0.000054)
(0.000523  0.000000  0.000050)
(0.000483  0.000000  0.000046)
(0.000445  0.000000  0.000043)
(0.000411  0.000000  0.000039)
(0.000379  0.000000  0.000036)
(0.000349  0.000000  0.000034)
(0.000322  0.000000  0.000031)
(0.000297  0.000000  0.000029)
(0.000274  0.000000  0.000026)
(0.000253  0.000000  0.000024)
(0.000233  0.000000  0.000023)
(0.000215  0.000000  0.000021)
(0.000198  0.000000  0.000019)
(0.000183  0.000000  0.000018)
(0.000168  0.000000  0.000016)
(0.000155  0.000000  0.000015)
(0.000143  0.000000  0.000014)
(0.000132  0.000000  0.000013)
(0.000122  0.000000  0.000012)
(0.000112  0.000000  0.000011)
(0.000103  0.000000  0.000010)
(0.000095  0.000000  0.000009)
(0.000088  0.000000  0.000009)
(0.000081  0.000000  0.000008)
(0.000075  0.000000  0.000007)
(0.000069  0.000000  0.000007)
(0.000063  0.000000  0.000006)
(0.000058  0.000000  0.000006)
(0.000054  0.000000  0.000005)
(0.000050  0.000000  0.000005)
(0.000046  0.000000  0.000004)
(0.000042  0.000000  0.000004)
(0.000039  0.000000  0.000004)
(0.000036  0.000000  0.000003)
(0.000033  0.000000  0.000003)
(0.000030  0.000000  0.000003)
(0.000028  0.000000  0.000003)
(0.000026  0.000000  0.000003)
(0.000024  0.000000  0.000002)
(0.000022  0.000000  0.000002)
(0.000020  0.000000  0.000002)
(0.000019  0.000000  0.000002)
(0.000017  0.000000  0.000002)
(0.000016  0.000000  0.000002)
(0.000015  0.000000  0.000001)
(0.000013  0.000000  0.000001)
(0.000012  0.000000  0.000001)
(0.000011  0.000000  0.000001)
(0.000011  0.000000  0.000001)
(0.000010  0.000000  0.000001)
(0.000009  0.000000  0.000001)
(0.000000  0.000000  0.000000)
(0.000000  0.000000  -0.000000)
(0.000000  0.000000  0.000000)
(0.000000  0.000000  -0.000000)
(0.000000  0.000000  0.000000)
(0.000000  0.000000  -0.000000)
(0.000000  0.000000  -0.000000)
(0.000000  0.000000  0.000000)
(0.000000  0.000000  -0.000000)
(0.000000  0.000000  0.000000)
(0.000000  0.000000  0.000000)
(0.000000  0.000000  -0.000000)
(0.000000  0.000000  -0.000000)
(0.000000  0.000000  0.000000)
(0.000000  0.000000  0.000000)
(0.000000  0.000000  -0.000000)
(0.000000  0.000000  0.000000)
(0.000000  0.000000  -0.000000)
(0.000000  0.000000  -0.000000)
(0.000000  0.000000  -0.000000)
(0.000000  0.000000  0.000000)
(0.000000  0.000000  0.000000)
(0.000000  0.000000  -0.000000)
(0.000000  0.000000  -0.000000)
(0.000000  0.000000  0.000000)
(0.000000  0.000000  0.000000)
(0.000000  0.000000  0.000000)
(0.000000  0.000000  -0.000000)
(0.000000  0.000000  0.000000)
(0.000000  0.000000  -0.000000)
(0.000000  0.000000  0.000000)
(0.000000  0.000000  0.000000)
(0.000000  0.000000  -0.000000)
(0.000000  0.000000  -0.000000)
(0.000000  0.000000  -0.000000)
(0.000000  0.000000  0.000000)
(0.000000  0.000000  0.000000)
(0.000000  0.000000  -0.000000)
(0.000000  0.000000  -0.000000)
(0.000000  0.000000  -0.000000)
(0.000000  0.000000  0.000000)
(0.000000  0.000000  -0.000000)
(0.000000  0.000000  -0.000000)
(0.000000  0.000000  -0.000000)
(0.000000  0.000000  0.000000)
(0.000000  0.000000  0.000000)
(0.000000  0.000000  0.000000)
(0.000000  0.000000  0.000000)
(0.000000  0.000000  -0.000000)
(0.000000  0.000000  0.000000)
(0.000000  0.000000  0.000000)
(0.000000  0.000000  -0.000000)
(0.000000  0.000000  -0.000000)
(0.000000  0.000000  0.000000)
(0.000000  0.000000  -0.000000)
(0.000000  0.000000  0.000000)
(0.000000  0.000000  -0.000000)
(0.000000  0.000000  -0.000000)
(0.000000  0.000000  -0.000000)
(0.000000  0.000000  0.000000)
(0.000000  0.000000  0.000000)
(0.000000  0.000000  -0.000000)
(0.000000  0.000000  0.000000)
(0.000000  0.000000  -0.000000)
(0.000000  0.000000  0.000000)
(0.000000  0.000000  0.000000)
(0.000000  0.000000  -0.000000)
(0.000000  0.000000  0.000000)
(0.000000  0.000000  -0.000000)
(0.000000  0.000000  0.000000)
(0.000000  0.000000  -0.000000)
(0.000000  0.000000  -0.000000)
(0.000000  0.000000  -0.000000)
(0.000000  0.000000  0.000000)
(0.000000  0.000000  -0.000000)
(0.000000  0.000000  0.000000)
(0.000000  0.000000  -0.000000)
(0.000000  0.000000  0.000000)
(0.000000  0.000000  -0.000000)
(0.000000  0.000000  -0.000000)
(0.000000  0.000000  0.000000)
(0.000000  0.000000  -0.000000)
(0.000000  0.000000  -0.000000)
(0.000000  0.000000  -0.000000)
(0.000000  0.000000  0.000000)
(0.000000  0.000000  -0.000000)
(0.000000  0.000000  -0.000000)
(0.000000  0.000000  0.000000)
(0.000000  0.000000  -0.000000)
(0.000000  0.000000  0.000000)
(0.000000  0.000000  -0.000000)
(0.000000  0.000000  0.000000)
(0.000000  0.000000  -0.000000)
(0.000000  0.000000  0.000000)
(0.000000  0.000000  -0.000000)
(0.000000  0.000000  0.000000)
(0.000000  0.000000  0.000000)
(0.000000  0.000000  -0.000000)
(0.000000  0.000000  -0.000000)
(0.000000  0.000000  -0.000000)
(0.000000  0.000000  0.000000)
(0.000000  0.000000  -0.000000)
(0.000000  0.000000  -0.000000)
(0.000000  0.000000  0.000000)
(0.000000  0.000000  0.000000)
(0.000000  0.000000  0.000000)
(0.000000  0.000000  -0.000000)
(0.000000  0.000000  0.000000)
(0.000000  0.000000  -0.000000)
(0.000000  0.000000  0.000000)
(0.000000  0.000000  -0.000000)
(0.000000  0.000000  0.000000)
(0.000000  0.000000  -0.000000)
(0.000000  0.000000  0.000000)
(0.000000  0.000000  -0.000000)
(0.000000  0.000000  0.000000)
(0.000000  0.000000  -0.000000)
(0.000000  0.000000  0.000000)
(0.000000  0.000000  -0.000000)
(0.000000  0.000000  -0.000000)
(0.000000  0.000000  0.000000)
(0.000000  0.000000  -0.000000)
(0.000000  0.000000  -0.000000)
(0.000000  0.000000  -0.000000)
(0.000000  0.000000  0.000000)
(0.000000  0.000000  0.000000)
(0.000000  0.000000  -0.000000)
(0.000000  0.000000  0.000000)
(0.000000  0.000000  -0.000000)
(0.000000  0.000000  -0.000000)
(0.000000  0.000000  -0.000000)
(0.000000  0.000000  0.000000)
(0.000000  0.000000  -0.000000)
(0.000000  0.000000  0.000000)
(0.000000  0.000000  -0.000000)
(0.000000  0.000000  0.000000)
(0.000000  0.000000  -0.000000)
(0.000000  0.000000  0.000000)
(0.000000  0.000000  -0.000000)
(0.000000  0.000000  -0.000000)
(0.000000  0.000000  0.000000)
(0.000000  0.000000  -0.000000)
(0.000000  0.000000  0.000000)
(0.000000  0.000000  -0.000000)
(0.000000  0.000000  0.000000)
(0.000000  0.000000  -0.000000)
(0.000000  0.000000  0.000000)
(0.000000  0.000000  0.000000)
(0.000000  0.000000  -0.000000)
(0.000000  0.000000  0.000000)
(0.000000  0.000000  -0.000000)
(0.000000  0.000000  0.000000)
(0.000000  0.000000  0.000000)
(0.000000  0.000000  -0.000000)
(0.000000  0.000000  -0.000000)
(0.000000  0.000000  0.000000)
(0.000000  0.000000  -0.000000)
(0.000000  0.000000  0.000000)
(0.000000  0.000000  -0.000000)
(0.000000  0.000000  -0.000000)
(0.000000  0.000000  -0.000000)
(0.000000  0.000000  0.000000)
(0.000000  0.000000  -0.000000)
(0.000000  0.000000  -0.000000)
(0.000000  0.000000  -0.000000)
(0.000000  0.000000  0.000000)
(0.000000  0.000000  -0.000000)
(0.000000  0.000000  0.000000)
(0.000000  0.000000  -0.000000)
(0.000000  0.000000  0.000000)
(0.000000  0.000000  -0.000000)
(0.000000  0.000000  -0.000000)
(0.000000  0.000000  -0.000000)
(0.000000  0.000000  -0.000000)
(0.000000  0.000000  -0.000000)
(0.000000  0.000000  -0.000000)
(0.000000  0.000000  0.000000)
(0.000000  0.000000  -0.000000)
(0.000000  0.000000  -0.000000)
(0.000000  0.000000  -0.000000)
(0.000000  0.000000  -0.000000)
(0.000000  0.000000  -0.000000)
(0.000000  0.000000  -0.000000)
(0.000000  0.000000  -0.000000)
(0.000000  0.000000  0.000000)
(0.000000  0.000000  -0.000000)
(0.000000  0.000000  -0.000000)
(0.000000  0.000000  -0.000000)
(0.000000  0.000000  -0.000000)
(0.000000  0.000000  -0.000000)
(0.000000  0.000000  -0.000000)
(0.000000  0.000000  -0.000000)
(0.000000  0.000000  -0.000000)
(0.000000  0.000000  -0.000000)
(0.000000  0.000000  -0.000000)
(0.000000  0.000000  -0.000000)
(0.000000  0.000000  -0.000000)
(0.000000  0.000000  -0.000000)
(0.000000  0.000000  -0.000000)
(0.000000  0.000000  -0.000000)
(0.000000  0.000000  -0.000000)
(0.000000  0.000000  -0.000000)
(0.000000  0.000000  -0.000000)
(0.000000  0.000000  -0.000000)
(0.000000  0.000000  -0.000000)
(0.000000  0.000000  -0.000000)
(0.000000  0.000000  -0.000000)
(0.000000  0.000000  -0.000000)
(0.000000  0.000000  -0.000000)
(0.000000  0.000000  -0.000000)
(0.000000  0.000000  -0.000000)
(0.000000  0.000000  -0.000000)
(0.000000  0.000000  -0.000000)
(0.000000  0.000000  -0.000000)
(0.000000  0.000000  -0.000000)
(0.000000  0.000000  -0.000000)
(0.000000  0.000000  -0.000000)
(0.000000  0.000000  -0.000000)
(0.000000  0.000000  -0.000000)
(0.000000  0.000000  -0.000000)
(0.000000  0.000000  -0.000000)
(0.000000  0.000000  -0.000000)
(0.000000  0.000000  -0.000000)
(0.000000  0.000000  -0.000000)
(0.000000  0.000000  -0.000000)
(0.000000  0.000000  -0.000000)
(0.000000  0.000000  -0.000000)
(0.000000  0.000000  -0.000000)
(0.000000  0.000000  -0.000000)
(0.000000  0.000000  -0.000000)
(0.000000  0.000000  -0.000000)
(0.000000  0.000000  -0.000000)
(0.000000  0.000000  -0.000000)
(0.000000  0.000000  -0.000000)
(0.000000  0.000000  -0.000000)
(0.000000  0.000000  -0.000000)
(0.000000  0.000000  -0.000000)
(0.000000  0.000000  -0.000000)
(0.000000  0.000000  -0.000000)
(0.000000  0.000000  -0.000000)
(0.000000  0.000000  -0.000000)
(0.000000  0.000000  -0.000000)
(0.000000  0.000000  -0.000000)
(0.000000  0.000000  -0.000000)
(0.000000  0.000000  -0.000000)
(0.000000  0.000000  -0.000000)
(0.000000  0.000000  -0.000000)
(0.000000  0.000000  -0.000000)
(0.000000  0.000000  -0.000000)
(0.000000  0.000000  -0.000000)
(0.000000  0.000000  -0.000000)
(0.000000  0.000000  -0.000000)
(0.000000  0.000000  -0.000000)
(0.000000  0.000000  -0.000000)
(0.000000  0.000000  -0.000000)
(0.000000  0.000000  -0.000000)
(0.000000  0.000000  -0.000000)
(0.000000  0.000000  -0.000000)
(0.000000  0.000000  -0.000000)
(0.000000  0.000000  -0.000000)
(0.000000  0.000000  -0.000000)
(0.000000  0.000000  -0.000000)
(0.000000  0.000000  -0.000000)
(0.000000  0.000000  -0.000000)
(0.000000  0.000000  -0.000000)
(0.000000  0.000000  -0.000000)
(0.000000  0.000000  -0.000000)
(0.000000  0.000000  -0.000000)
(0.000000  0.000000  -0.000000)
(0.000000  0.000000  -0.000000)
(0.000000  0.000000  -0.000000)
(0.000000  0.000000  -0.000000)
(0.000000  0.000000  -0.000000)
(0.000000  0.000000  -0.000000)
(0.000000  0.000000  -0.000000)
(0.000000  0.000000  -0.000000)
(0.000000  0.000000  -0.000000)
(0.000000  0.000000  -0.000000)
(0.000000  0.000000  -0.000000)
(0.000000  0.000000  -0.000000)
(0.000000  0.000000  -0.000000)
(0.000000  0.000000  -0.000000)
(0.000000  0.000000  -0.000000)
(0.000000  0.000000  -0.000000)
(0.000000  0.000000  -0.000000)
(0.000000  0.000000  -0.000000)
(0.000000  0.000000  -0.000000)
(0.000000  0.000000  -0.000000)
(0.000000  0.000000  -0.000000)
(0.000000  0.000000  -0.000000)
(0.000000  0.000000  -0.000000)
(0.000000  0.000000  -0.000000)
(0.000000  0.000000  -0.000000)
(0.000000  0.000000  -0.000000)
(0.000000  0.000000  -0.000000)
(0.000000  0.000000  -0.000000)
(0.000000  0.000000  -0.000000)
(0.000000  0.000000  -0.000000)
(0.000000  0.000000  -0.000000)
(0.000000  0.000000  -0.000000)
(0.000000  0.000000  -0.000000)
(0.000000  0.000000  -0.000000)
(0.000000  0.000000  -0.000000)
(0.000000  0.000000  -0.000000)
(0.000000  0.000000  -0.000000)
(0.000000  0.000000  -0.000000)
(0.000000  0.000000  -0.000000)
(0.000000  0.000000  -0.000000)
(0.000000  0.000000  -0.000000)
(0.000000  0.000000  -0.000000)
(0.000000  0.000000  -0.000000)
(0.000000  0.000000  -0.000000)
(0.000000  0.000000  -0.000000)
(0.000000  0.000000  -0.000000)
(0.000000  0.000000  -0.000000)
(0.000000  0.000000  -0.000000)
(0.000000  0.000000  -0.000000)
(0.000000  0.000000  -0.000000)
(0.000000  0.000000  -0.000000)
(0.000000  0.000000  -0.000000)
(0.000000  0.000000  -0.000000)
(0.000000  0.000000  -0.000000)
(0.000000  0.000000  -0.000000)
(0.000000  0.000000  -0.000000)
(0.000000  0.000000  -0.000000)
(0.000000  0.000000  -0.000000)
(0.000000  0.000000  -0.000000)
(0.000000  0.000000  -0.000000)
(0.000000  0.000000  -0.000000)
(0.000000  0.000000  -0.000000)
(0.000000  0.000000  -0.000000)
(0.000000  0.000000  -0.000000)
(0.000000  0.000000  -0.000000)
(0.000000  0.000000  -0.000000)
(0.000000  0.000000  -0.000000)
(0.000000  0.000000  -0.000000)
(0.000000  0.000000  -0.000000)
(0.000000  0.000000  -0.000000)
(0.000000  0.000000  -0.000000)
(0.000000  0.000000  -0.000000)
(0.000000  0.000000  -0.000000)
(0.000000  0.000000  -0.000000)
(0.000000  0.000000  -0.000000)
(0.000000  0.000000  -0.000000)
(0.000000  0.000000  -0.000000)
(0.000000  0.000000  -0.000000)
(0.000000  0.000000  -0.000000)
(0.000000  0.000000  -0.000000)
(0.000000  0.000000  -0.000000)
(0.000000  0.000000  -0.000000)
(0.000000  0.000000  -0.000000)
(0.000000  0.000000  -0.000000)
(0.000000  0.000000  -0.000000)
(0.000000  0.000000  -0.000000)
(0.000000  0.000000  -0.000000)
(0.000000  0.000000  -0.000000)
(0.000000  0.000000  -0.000000)
(0.000000  0.000000  -0.000000)
(0.000000  0.000000  -0.000000)
(0.000000  0.000000  -0.000000)
(0.000000  0.000000  -0.000000)
(0.000000  0.000000  -0.000000)
(0.000000  0.000000  -0.000000)
(0.000000  0.000000  -0.000000)
(0.000000  0.000000  -0.000000)
(0.000000  0.000000  -0.000000)
(0.000000  0.000000  -0.000000)
(0.000000  0.000000  -0.000000)
(0.000000  0.000000  -0.000000)
(0.000000  0.000000  -0.000000)
(0.000000  0.000000  -0.000000)
(0.000000  0.000000  -0.000000)
(0.000000  0.000000  -0.000000)
(0.000000  0.000000  -0.000000)
(0.000000  0.000000  -0.000000)
(0.000000  0.000000  -0.000000)
(0.000000  0.000000  -0.000000)
(0.000000  0.000000  -0.000000)
(0.000000  0.000000  -0.000000)
(0.000000  0.000000  -0.000000)
(0.000000  0.000000  -0.000000)
(0.000000  0.000000  -0.000000)
(0.000000  0.000000  -0.000000)
(0.000000  0.000000  -0.000000)
(0.000000  0.000000  -0.000000)
(0.000000  0.000000  -0.000000)
(0.000000  0.000000  -0.000000)
(0.000000  0.000000  -0.000000)
(0.000000  0.000000  -0.000000)
(0.000000  0.000000  -0.000000)
(0.000000  0.000000  -0.000000)
(0.000000  0.000000  -0.000000)
(0.000000  0.000000  -0.000000)
(0.000000  0.000000  -0.000000)
(0.000000  0.000000  -0.000000)
(0.000000  0.000000  -0.000000)
(0.000000  0.000000  -0.000000)
(0.000000  0.000000  -0.000000)
(0.000000  0.000000  -0.000000)
(0.000000  0.000000  -0.000000)
(0.000000  0.000000  -0.000000)
(0.000000  0.000000  -0.000000)
(0.000000  0.000000  -0.000000)
(0.000000  0.000000  -0.000000)
(0.000000  0.000000  -0.000000)
(0.000000  0.000000  -0.000000)
(0.000000  0.000000  -0.000000)
(0.000000  0.000000  -0.000000)
(0.000000  0.000000  -0.000000)
(0.000000  0.000000  -0.000000)
(0.000000  0.000000  -0.000000)
(0.000000  0.000000  -0.000000)
(0.000000  0.000000  -0.000000)
(0.000000  0.000000  -0.000000)
(0.000000  0.000000  -0.000000)
(0.000000  0.000000  -0.000000)
(0.000000  0.000000  -0.000000)
(0.000000  0.000000  -0.000000)
(0.000000  0.000000  -0.000000)
(0.000000  0.000000  -0.000000)
(0.000000  0.000000  -0.000000)
(0.000000  0.000000  -0.000000)
(0.000000  0.000000  -0.000000)
(0.000000  0.000000  -0.000000)
(0.000000  0.000000  -0.000000)
(0.000000  0.000000  -0.000000)
(0.000000  0.000000  -0.000000)
(0.000000  0.000000  -0.000000)
(0.000000  0.000000  -0.000000)
(0.000000  0.000000  -0.000000)
(0.000000  0.000000  -0.000000)
(0.000000  0.000000  -0.000000)
(0.000000  0.000000  -0.000000)
(0.000000  0.000000  -0.000000)
(0.000000  0.000000  -0.000000)
(0.000000  0.000000  -0.000000)
(0.000000  0.000000  -0.000000)
(0.000000  0.000000  -0.000000)
(0.000000  0.000000  -0.000000)
(0.000000  0.000000  -0.000000)
(0.000000  0.000000  -0.000000)
(0.000000  0.000000  -0.000000)
(0.000000  0.000000  -0.000000)
(0.000000  0.000000  -0.000000)
(0.000000  0.000000  -0.000000)
(0.000000  0.000000  -0.000000)
(0.000000  0.000000  -0.000000)
(0.000000  0.000000  -0.000000)
(0.000000  0.000000  -0.000000)
(0.000000  0.000000  -0.000000)
(0.000000  0.000000  -0.000000)
(0.000000  0.000000  -0.000000)
(0.000000  0.000000  -0.000000)
(0.000000  0.000000  -0.000000)
(0.000000  0.000000  -0.000000)
(0.000000  0.000000  -0.000000)
(0.000000  0.000000  -0.000000)
(0.000000  0.000000  -0.000000)
(0.000000  0.000000  -0.000000)
(0.000000  0.000000  -0.000000)
(0.000000  0.000000  -0.000000)
(0.000000  0.000000  -0.000000)
(0.000000  0.000000  -0.000000)
(0.000000  0.000000  -0.000000)
(0.000000  0.000000  -0.000000)
(0.000001  0.000000  -0.000000)
(0.000001  0.000000  -0.000000)
(0.000001  0.000000  -0.000000)
(0.000001  0.000000  -0.000000)
(0.000001  0.000000  -0.000000)
(0.000001  0.000000  -0.000000)
(0.000001  0.000000  -0.000000)
(0.000001  0.000000  -0.000000)
(0.000001  0.000000  -0.000000)
(0.000001  0.000000  -0.000000)
(0.000001  0.000000  -0.000000)
(0.000001  0.000000  -0.000000)
(0.000001  0.000000  -0.000000)
(0.000001  0.000000  -0.000000)
(0.000002  0.000000  -0.000000)
(0.000002  0.000000  -0.000000)
(0.000002  0.000000  -0.000000)
(0.000002  0.000000  -0.000000)
(0.000002  0.000000  -0.000000)
(0.000002  0.000000  -0.000000)
(0.000003  0.000000  -0.000000)
(0.000003  0.000000  -0.000000)
(0.000003  0.000000  -0.000000)
(0.000003  0.000000  -0.000000)
(0.000004  0.000000  -0.000000)
(0.000004  0.000000  -0.000000)
(0.000004  0.000000  -0.000000)
(0.000005  0.000000  -0.000000)
(0.000005  0.000000  -0.000001)
(0.000005  0.000000  -0.000001)
(0.000006  0.000000  -0.000001)
(0.000006  0.000000  -0.000001)
(0.000007  0.000000  -0.000001)
(0.000008  0.000000  -0.000001)
(0.000008  0.000000  -0.000001)
(0.000009  0.000000  -0.000001)
(0.000010  0.000000  -0.000001)
(0.000010  0.000000  -0.000001)
(0.000011  0.000000  -0.000001)
(0.000012  0.000000  -0.000001)
(0.000013  0.000000  -0.000001)
(0.000015  0.000000  -0.000002)
(0.000016  0.000000  -0.000002)
(0.000017  0.000000  -0.000002)
(0.000019  0.000000  -0.000002)
(0.000020  0.000000  -0.000002)
(0.000022  0.000000  -0.000002)
(0.000024  0.000000  -0.000003)
(0.000026  0.000000  -0.000003)
(0.000028  0.000000  -0.000003)
(0.000030  0.000000  -0.000003)
(0.000033  0.000000  -0.000004)
(0.000036  0.000000  -0.000004)
(0.000039  0.000000  -0.000004)
(0.000042  0.000000  -0.000005)
(0.000046  0.000000  -0.000005)
(0.000050  0.000000  -0.000005)
(0.000054  0.000000  -0.000006)
(0.000058  0.000000  -0.000006)
(0.000063  0.000000  -0.000007)
(0.000069  0.000000  -0.000007)
(0.000075  0.000000  -0.000008)
(0.000081  0.000000  -0.000009)
(0.000088  0.000000  -0.000009)
(0.000095  0.000000  -0.000010)
(0.000103  0.000000  -0.000011)
(0.000112  0.000000  -0.000012)
(0.000122  0.000000  -0.000013)
(0.000132  0.000000  -0.000014)
(0.000143  0.000000  -0.000015)
(0.000155  0.000000  -0.000017)
(0.000168  0.000000  -0.000018)
(0.000182  0.000000  -0.000020)
(0.000198  0.000000  -0.000021)
(0.000215  0.000000  -0.000023)
(0.000233  0.000000  -0.000025)
(0.000253  0.000000  -0.000027)
(0.000274  0.000000  -0.000029)
(0.000297  0.000000  -0.000032)
(0.000322  0.000000  -0.000034)
(0.000349  0.000000  -0.000037)
(0.000378  0.000000  -0.000040)
(0.000410  0.000000  -0.000044)
(0.000445  0.000000  -0.000047)
(0.000482  0.000000  -0.000051)
(0.000522  0.000000  -0.000055)
(0.000566  0.000000  -0.000060)
(0.000614  0.000000  -0.000065)
(0.000665  0.000000  -0.000070)
(0.000720  0.000000  -0.000076)
(0.000780  0.000000  -0.000082)
(0.000845  0.000000  -0.000089)
(0.000915  0.000000  -0.000096)
(0.000990  0.000000  -0.000103)
(0.001072  0.000000  -0.000112)
(0.001160  0.000000  -0.000121)
(0.001255  0.000000  -0.000130)
(0.001358  0.000000  -0.000140)
(0.001468  0.000000  -0.000151)
(0.001588  0.000000  -0.000163)
(0.001716  0.000000  -0.000175)
(0.001855  0.000000  -0.000189)
(0.002003  0.000000  -0.000203)
(0.002164  0.000000  -0.000218)
(0.002336  0.000000  -0.000235)
(0.002521  0.000000  -0.000252)
(0.002719  0.000000  -0.000270)
(0.002932  0.000000  -0.000290)
(0.003160  0.000000  -0.000311)
(0.003405  0.000000  -0.000332)
(0.003666  0.000000  -0.000355)
(0.003945  0.000000  -0.000380)
(0.004243  0.000000  -0.000405)
(0.004562  0.000000  -0.000432)
(0.004901  0.000000  -0.000460)
(0.005261  0.000000  -0.000489)
(0.005644  0.000000  -0.000519)
(0.006051  0.000000  -0.000550)
(0.006482  0.000000  -0.000583)
(0.006939  0.000000  -0.000616)
(0.007421  0.000000  -0.000650)
(0.007929  0.000000  -0.000685)
(0.008465  0.000000  -0.000721)
(0.009028  0.000000  -0.000757)
(0.009618  0.000000  -0.000793)
(0.010237  0.000000  -0.000830)
(0.010883  0.000000  -0.000866)
(0.011556  0.000000  -0.000902)
(0.012257  0.000000  -0.000936)
(0.012984  0.000000  -0.000970)
(0.013736  0.000000  -0.001003)
(0.014513  0.000000  -0.001033)
(0.015312  0.000000  -0.001062)
(0.016133  0.000000  -0.001088)
(0.016972  0.000000  -0.001111)
(0.017827  0.000000  -0.001130)
(0.018697  0.000000  -0.001146)
(0.019577  0.000000  -0.001158)
(0.020465  0.000000  -0.001166)
(0.021356  0.000000  -0.001168)
(0.022248  0.000000  -0.001166)
(0.023136  0.000000  -0.001157)
(0.024015  0.000000  -0.001143)
(0.024881  0.000000  -0.001123)
(0.025731  0.000000  -0.001097)
(0.026557  0.000000  -0.001065)
(0.027357  0.000000  -0.001026)
(0.028125  0.000000  -0.000981)
(0.028855  0.000000  -0.000930)
(0.029545  0.000000  -0.000872)
(0.030188  0.000000  -0.000809)
(0.030781  0.000000  -0.000740)
(0.031320  0.000000  -0.000666)
(0.031800  0.000000  -0.000588)
(0.032218  0.000000  -0.000505)
(0.032571  0.000000  -0.000418)
(0.032857  0.000000  -0.000329)
(0.033074  0.000000  -0.000237)
(0.033219  0.000000  -0.000143)
(0.033292  0.000000  -0.000048)
(0.033292  0.000000  0.000048)
(0.033219  0.000000  0.000143)
(0.033074  0.000000  0.000237)
(0.032857  0.000000  0.000329)
(0.032571  0.000000  0.000418)
(0.032218  0.000000  0.000505)
(0.031800  0.000000  0.000588)
(0.031320  0.000000  0.000666)
(0.030781  0.000000  0.000740)
(0.030188  0.000000  0.000809)
(0.029545  0.000000  0.000872)
(0.028855  0.000000  0.000930)
(0.028125  0.000000  0.000981)
(0.027357  0.000000  0.001026)
(0.026557  0.000000  0.001065)
(0.025731  0.000000  0.001097)
(0.024881  0.000000  0.001123)
(0.024015  0.000000  0.001143)
(0.023136  0.000000  0.001157)
(0.022248  0.000000  0.001166)
(0.021356  0.000000  0.001168)
(0.020465  0.000000  0.001166)
(0.019577  0.000000  0.001158)
(0.018697  0.000000  0.001146)
(0.017827  0.000000  0.001130)
(0.016972  0.000000  0.001111)
(0.016133  0.000000  0.001088)
(0.015312  0.000000  0.001062)
(0.014513  0.000000  0.001033)
(0.013736  0.000000  0.001003)
(0.012984  0.000000  0.000970)
(0.012257  0.000000  0.000936)
(0.011556  0.000000  0.000902)
(0.010883  0.000000  0.000866)
(0.010237  0.000000  0.000830)
(0.009618  0.000000  0.000793)
(0.009028  0.000000  0.000757)
(0.008465  0.000000  0.000721)
(0.007929  0.000000  0.000685)
(0.007421  0.000000  0.000650)
(0.006939  0.000000  0.000616)
(0.006482  0.000000  0.000583)
(0.006051  0.000000  0.000550)
(0.005644  0.000000  0.000519)
(0.005261  0.000000  0.000489)
(0.004901  0.000000  0.000460)
(0.004562  0.000000  0.000432)
(0.004243  0.000000  0.000405)
(0.003945  0.000000  0.000380)
(0.003666  0.000000  0.000355)
(0.003405  0.000000  0.000332)
(0.003160  0.000000  0.000311)
(0.002932  0.000000  0.000290)
(0.002719  0.000000  0.000270)
(0.002521  0.000000  0.000252)
(0.002336  0.000000  0.000235)
(0.002164  0.000000  0.000218)
(0.002003  0.000000  0.000203)
(0.001855  0.000000  0.000189)
(0.001716  0.000000  0.000175)
(0.001588  0.000000  0.000163)
(0.001468  0.000000  0.000151)
(0.001358  0.000000  0.000140)
(0.001255  0.000000  0.000130)
(0.001160  0.000000  0.000121)
(0.001072  0.000000  0.000112)
(0.000990  0.000000  0.000103)
(0.000915  0.000000  0.000096)
(0.000845  0.000000  0.000089)
(0.000780  0.000000  0.000082)
(0.000720  0.000000  0.000076)
(0.000665  0.000000  0.000070)
(0.000614  0.000000  0.000065)
(0.000566  0.000000  0.000060)
(0.000522  0.000000  0.000055)
(0.000482  0.000000  0.000051)
(0.000445  0.000000  0.000047)
(0.000410  0.000000  0.000044)
(0.000378  0.000000  0.000040)
(0.000349  0.000000  0.000037)
(0.000322  0.000000  0.000034)
(0.000297  0.000000  0.000032)
(0.000274  0.000000  0.000029)
(0.000253  0.000000  0.000027)
(0.000233  0.000000  0.000025)
(0.000215  0.000000  0.000023)
(0.000198  0.000000  0.000021)
(0.000182  0.000000  0.000020)
(0.000168  0.000000  0.000018)
(0.000155  0.000000  0.000017)
(0.000143  0.000000  0.000015)
(0.000132  0.000000  0.000014)
(0.000122  0.000000  0.000013)
(0.000112  0.000000  0.000012)
(0.000103  0.000000  0.000011)
(0.000095  0.000000  0.000010)
(0.000088  0.000000  0.000009)
(0.000081  0.000000  0.000009)
(0.000075  0.000000  0.000008)
(0.000069  0.000000  0.000007)
(0.000063  0.000000  0.000007)
(0.000058  0.000000  0.000006)
(0.000054  0.000000  0.000006)
(0.000050  0.000000  0.000005)
(0.000046  0.000000  0.000005)
(0.000042  0.000000  0.000005)
(0.000039  0.000000  0.000004)
(0.000036  0.000000  0.000004)
(0.000033  0.000000  0.000004)
(0.000030  0.000000  0.000003)
(0.000028  0.000000  0.000003)
(0.000026  0.000000  0.000003)
(0.000024  0.000000  0.000003)
(0.000022  0.000000  0.000002)
(0.000020  0.000000  0.000002)
(0.000019  0.000000  0.000002)
(0.000017  0.000000  0.000002)
(0.000016  0.000000  0.000002)
(0.000015  0.000000  0.000002)
(0.000013  0.000000  0.000001)
(0.000012  0.000000  0.000001)
(0.000011  0.000000  0.000001)
(0.000010  0.000000  0.000001)
(0.000010  0.000000  0.000001)
(0.000009  0.000000  0.000001)
(0.000000  0.000000  0.000000)
(0.000000  0.000000  -0.000000)
(0.000000  0.000000  -0.000000)
(-0.000000  0.000000  -0.000000)
(-0.000000  0.000000  0.000000)
(0.000000  0.000000  -0.000000)
(-0.000000  0.000000  0.000000)
(0.000000  0.000000  -0.000000)
(0.000000  0.000000  0.000000)
(-0.000000  0.000000  -0.000000)
(0.000000  0.000000  0.000000)
(-0.000000  0.000000  0.000000)
(-0.000000  0.000000  -0.000000)
(-0.000000  0.000000  0.000000)
(-0.000000  0.000000  0.000000)
(-0.000000  0.000000  -0.000000)
(-0.000000  0.000000  0.000000)
(-0.000000  0.000000  -0.000000)
(-0.000000  0.000000  0.000000)
(-0.000000  0.000000  -0.000000)
(-0.000000  0.000000  0.000000)
(-0.000000  0.000000  0.000000)
(-0.000000  0.000000  -0.000000)
(-0.000000  0.000000  -0.000000)
(-0.000000  0.000000  0.000000)
(-0.000000  0.000000  -0.000000)
(-0.000000  0.000000  0.000000)
(-0.000000  0.000000  -0.000000)
(-0.000000  0.000000  0.000000)
(-0.000000  0.000000  -0.000000)
(-0.000000  0.000000  0.000000)
(-0.000000  0.000000  -0.000000)
(0.000000  0.000000  -0.000000)
(-0.000000  0.000000  0.000000)
(-0.000000  0.000000  -0.000000)
(-0.000000  0.000000  -0.000000)
(-0.000000  0.000000  0.000000)
(-0.000000  0.000000  -0.000000)
(-0.000000  0.000000  0.000000)
(-0.000000  0.000000  -0.000000)
(-0.000000  0.000000  -0.000000)
(-0.000000  0.000000  0.000000)
(-0.000000  0.000000  -0.000000)
(-0.000000  0.000000  0.000000)
(-0.000000  0.000000  0.000000)
(-0.000000  0.000000  -0.000000)
(-0.000000  0.000000  0.000000)
(-0.000000  0.000000  -0.000000)
(-0.000000  0.000000  -0.000000)
(-0.000000  0.000000  0.000000)
(-0.000000  0.000000  -0.000000)
(-0.000000  0.000000  0.000000)
(-0.000000  0.000000  -0.000000)
(-0.000000  0.000000  0.000000)
(-0.000000  0.000000  -0.000000)
(-0.000000  0.000000  -0.000000)
(-0.000000  0.000000  0.000000)
(-0.000000  0.000000  0.000000)
(-0.000000  0.000000  0.000000)
(-0.000000  0.000000  -0.000000)
(-0.000000  0.000000  -0.000000)
(-0.000000  0.000000  0.000000)
(-0.000000  0.000000  -0.000000)
(-0.000000  0.000000  -0.000000)
(-0.000000  0.000000  0.000000)
(-0.000000  0.000000  -0.000000)
(-0.000000  0.000000  0.000000)
(-0.000000  0.000000  -0.000000)
(-0.000000  0.000000  0.000000)
(-0.000000  0.000000  -0.000000)
(-0.000000  0.000000  0.000000)
(-0.000000  0.000000  -0.000000)
(-0.000000  0.000000  -0.000000)
(-0.000000  0.000000  0.000000)
(-0.000000  0.000000  0.000000)
(-0.000000  0.000000  -0.000000)
(-0.000000  0.000000  -0.000000)
(-0.000000  0.000000  -0.000000)
(-0.000000  0.000000  0.000000)
(-0.000000  0.000000  -0.000000)
(-0.000000  0.000000  0.000000)
(-0.000000  0.000000  -0.000000)
(-0.000000  0.000000  -0.000000)
(-0.000000  0.000000  0.000000)
(-0.000000  0.000000  0.000000)
(-0.000000  0.000000  -0.000000)
(-0.000000  0.000000  0.000000)
(-0.000000  0.000000  -0.000000)
(-0.000000  0.000000  0.000000)
(-0.000000  0.000000  -0.000000)
(-0.000000  0.000000  -0.000000)
(-0.000000  0.000000  0.000000)
(-0.000000  0.000000  0.000000)
(-0.000000  0.000000  0.000000)
(-0.000000  0.000000  -0.000000)
(-0.000000  0.000000  -0.000000)
(-0.000000  0.000000  -0.000000)
(-0.000000  0.000000  -0.000000)
(-0.000000  0.000000  0.000000)
(-0.000000  0.000000  0.000000)
(-0.000000  0.000000  0.000000)
(-0.000000  0.000000  0.000000)
(-0.000000  0.000000  -0.000000)
(-0.000000  0.000000  -0.000000)
(-0.000000  0.000000  -0.000000)
(-0.000000  0.000000  0.000000)
(-0.000000  0.000000  0.000000)
(-0.000000  0.000000  0.000000)
(-0.000000  0.000000  -0.000000)
(-0.000000  0.000000  -0.000000)
(-0.000000  0.000000  -0.000000)
(-0.000000  0.000000  0.000000)
(-0.000000  0.000000  -0.000000)
(-0.000000  0.000000  -0.000000)
(-0.000000  0.000000  0.000000)
(-0.000000  0.000000  -0.000000)
(-0.000000  0.000000  0.000000)
(-0.000000  0.000000  -0.000000)
(-0.000000  0.000000  0.000000)
(0.000000  0.000000  -0.000000)
(-0.000000  0.000000  0.000000)
(-0.000000  0.000000  0.000000)
(0.000000  0.000000  -0.000000)
(-0.000000  0.000000  0.000000)
(-0.000000  0.000000  -0.000000)
(-0.000000  0.000000  0.000000)
(-0.000000  0.000000  -0.000000)
(-0.000000  0.000000  0.000000)
(-0.000000  0.000000  0.000000)
(-0.000000  0.000000  0.000000)
(-0.000000  0.000000  -0.000000)
(-0.000000  0.000000  0.000000)
(-0.000000  0.000000  0.000000)
(-0.000000  0.000000  -0.000000)
(-0.000000  0.000000  0.000000)
(-0.000000  0.000000  -0.000000)
(-0.000000  0.000000  -0.000000)
(-0.000000  0.000000  0.000000)
(-0.000000  0.000000  0.000000)
(-0.000000  0.000000  -0.000000)
(-0.000000  0.000000  0.000000)
(-0.000000  0.000000  0.000000)
(-0.000000  0.000000  -0.000000)
(-0.000000  0.000000  0.000000)
(-0.000000  0.000000  -0.000000)
(-0.000000  0.000000  -0.000000)
(-0.000000  0.000000  0.000000)
(-0.000000  0.000000  -0.000000)
(-0.000000  0.000000  -0.000000)
(-0.000000  0.000000  0.000000)
(-0.000000  0.000000  -0.000000)
(-0.000000  0.000000  0.000000)
(-0.000000  0.000000  -0.000000)
(-0.000000  0.000000  0.000000)
(-0.000000  0.000000  -0.000000)
(-0.000000  0.000000  0.000000)
(-0.000000  0.000000  -0.000000)
(-0.000000  0.000000  -0.000000)
(-0.000000  0.000000  0.000000)
(-0.000000  0.000000  -0.000000)
(-0.000000  0.000000  0.000000)
(-0.000000  0.000000  -0.000000)
(-0.000000  0.000000  -0.000000)
(-0.000000  0.000000  -0.000000)
(-0.000000  0.000000  -0.000000)
(-0.000000  0.000000  -0.000000)
(-0.000000  0.000000  -0.000000)
(-0.000000  0.000000  -0.000000)
(-0.000000  0.000000  -0.000000)
(-0.000000  0.000000  -0.000000)
(-0.000000  0.000000  0.000000)
(-0.000000  0.000000  -0.000000)
(-0.000000  0.000000  -0.000000)
(-0.000000  0.000000  -0.000000)
(-0.000000  0.000000  -0.000000)
(-0.000000  0.000000  0.000000)
(-0.000000  0.000000  -0.000000)
(-0.000000  0.000000  0.000000)
(-0.000000  0.000000  -0.000000)
(-0.000000  0.000000  -0.000000)
(-0.000000  0.000000  -0.000000)
(-0.000000  0.000000  -0.000000)
(-0.000000  0.000000  -0.000000)
(-0.000000  0.000000  -0.000000)
(-0.000000  0.000000  -0.000000)
(-0.000000  0.000000  -0.000000)
(-0.000000  0.000000  -0.000000)
(-0.000000  0.000000  -0.000000)
(-0.000000  0.000000  -0.000000)
(-0.000000  0.000000  -0.000000)
(-0.000000  0.000000  -0.000000)
(-0.000000  0.000000  -0.000000)
(-0.000000  0.000000  -0.000000)
(-0.000000  0.000000  -0.000000)
(-0.000000  0.000000  -0.000000)
(-0.000000  0.000000  -0.000000)
(-0.000000  0.000000  -0.000000)
(0.000000  0.000000  -0.000000)
(0.000000  0.000000  -0.000000)
(-0.000000  0.000000  -0.000000)
(0.000000  0.000000  -0.000000)
(0.000000  0.000000  -0.000000)
(0.000000  0.000000  -0.000000)
(0.000000  0.000000  -0.000000)
(0.000000  0.000000  -0.000000)
(0.000000  0.000000  -0.000000)
(0.000000  0.000000  -0.000000)
(0.000000  0.000000  -0.000000)
(0.000000  0.000000  -0.000000)
(0.000000  0.000000  -0.000000)
(0.000000  0.000000  -0.000000)
(0.000000  0.000000  -0.000000)
(0.000000  0.000000  -0.000000)
(0.000000  0.000000  -0.000000)
(0.000000  0.000000  -0.000000)
(0.000000  0.000000  -0.000000)
(0.000000  0.000000  -0.000000)
(0.000000  0.000000  -0.000000)
(0.000000  0.000000  -0.000000)
(0.000000  0.000000  -0.000000)
(0.000000  0.000000  -0.000000)
(0.000000  0.000000  -0.000000)
(0.000000  0.000000  -0.000000)
(0.000000  0.000000  -0.000000)
(0.000000  0.000000  -0.000000)
(0.000000  0.000000  -0.000000)
(0.000000  0.000000  -0.000000)
(0.000000  0.000000  -0.000000)
(0.000000  0.000000  -0.000000)
(0.000000  0.000000  -0.000000)
(0.000000  0.000000  -0.000000)
(0.000000  0.000000  -0.000000)
(0.000000  0.000000  -0.000000)
(0.000000  0.000000  -0.000000)
(0.000000  0.000000  -0.000000)
(0.000000  0.000000  -0.000000)
(0.000000  0.000000  -0.000000)
(0.000000  0.000000  -0.000000)
(0.000000  0.000000  -0.000000)
(0.000000  0.000000  -0.000000)
(0.000000  0.000000  -0.000000)
(0.000000  0.000000  -0.000000)
(0.000000  0.000000  -0.000000)
(0.000000  0.000000  -0.000000)
(0.000000  0.000000  -0.000000)
(0.000000  0.000000  -0.000000)
(0.000000  0.000000  -0.000000)
(0.000000  0.000000  -0.000000)
(0.000000  0.000000  -0.000000)
(0.000000  0.000000  -0.000000)
(0.000000  0.000000  -0.000000)
(0.000000  0.000000  -0.000000)
(0.000000  0.000000  -0.000000)
(0.000000  0.000000  -0.000000)
(0.000000  0.000000  -0.000000)
(0.000000  0.000000  -0.000000)
(0.000000  0.000000  -0.000000)
(0.000000  0.000000  -0.000000)
(0.000000  0.000000  -0.000000)
(0.000000  0.000000  -0.000000)
(0.000000  0.000000  -0.000000)
(0.000000  0.000000  -0.000000)
(0.000000  0.000000  -0.000000)
(0.000000  0.000000  -0.000000)
(0.000000  0.000000  -0.000000)
(0.000000  0.000000  -0.000000)
(0.000000  0.000000  -0.000000)
(0.000000  0.000000  -0.000000)
(0.000000  0.000000  -0.000000)
(0.000000  0.000000  -0.000000)
(0.000000  0.000000  -0.000000)
(0.000000  0.000000  -0.000000)
(0.000000  0.000000  -0.000000)
(0.000000  0.000000  -0.000000)
(0.000000  0.000000  -0.000000)
(0.000000  0.000000  -0.000000)
(0.000000  0.000000  -0.000000)
(0.000000  0.000000  -0.000000)
(0.000000  0.000000  -0.000000)
(0.000000  0.000000  -0.000000)
(0.000000  0.000000  -0.000000)
(0.000000  0.000000  -0.000000)
(0.000000  0.000000  -0.000000)
(0.000000  0.000000  -0.000000)
(0.000000  0.000000  -0.000000)
(0.000000  0.000000  -0.000000)
(0.000000  0.000000  -0.000000)
(0.000000  0.000000  -0.000000)
(0.000000  0.000000  -0.000000)
(0.000000  0.000000  -0.000000)
(0.000000  0.000000  -0.000000)
(0.000000  0.000000  -0.000000)
(0.000000  0.000000  -0.000000)
(0.000000  0.000000  -0.000000)
(0.000000  0.000000  -0.000000)
(0.000000  0.000000  -0.000000)
(0.000000  0.000000  -0.000000)
(0.000000  0.000000  -0.000000)
(0.000000  0.000000  -0.000000)
(0.000000  0.000000  -0.000000)
(0.000000  0.000000  -0.000000)
(0.000000  0.000000  -0.000000)
(0.000000  0.000000  -0.000000)
(0.000000  0.000000  -0.000000)
(0.000000  0.000000  -0.000000)
(0.000000  0.000000  -0.000000)
(0.000000  0.000000  -0.000000)
(0.000000  0.000000  -0.000000)
(0.000000  0.000000  -0.000000)
(0.000000  0.000000  -0.000000)
(0.000000  0.000000  -0.000000)
(0.000000  0.000000  -0.000000)
(0.000000  0.000000  -0.000000)
(0.000000  0.000000  -0.000000)
(0.000000  0.000000  -0.000000)
(0.000000  0.000000  -0.000000)
(0.000000  0.000000  -0.000000)
(0.000000  0.000000  -0.000000)
(0.000000  0.000000  -0.000000)
(0.000000  0.000000  -0.000000)
(0.000000  0.000000  -0.000000)
(0.000000  0.000000  -0.000000)
(0.000000  0.000000  -0.000000)
(0.000000  0.000000  -0.000000)
(0.000000  0.000000  -0.000000)
(0.000000  0.000000  -0.000000)
(0.000000  0.000000  -0.000000)
(0.000000  0.000000  -0.000000)
(0.000000  0.000000  -0.000000)
(0.000000  0.000000  -0.000000)
(0.000000  0.000000  -0.000000)
(0.000000  0.000000  -0.000000)
(0.000000  0.000000  -0.000000)
(0.000000  0.000000  -0.000000)
(0.000000  0.000000  -0.000000)
(0.000000  0.000000  -0.000000)
(0.000000  0.000000  -0.000000)
(0.000000  0.000000  -0.000000)
(0.000000  0.000000  -0.000000)
(0.000000  0.000000  -0.000000)
(0.000000  0.000000  -0.000000)
(0.000000  0.000000  -0.000000)
(0.000000  0.000000  -0.000000)
(0.000000  0.000000  -0.000000)
(0.000000  0.000000  -0.000000)
(0.000000  0.000000  -0.000000)
(0.000000  0.000000  -0.000000)
(0.000000  0.000000  -0.000000)
(0.000000  0.000000  -0.000000)
(0.000000  0.000000  -0.000000)
(0.000000  0.000000  -0.000000)
(0.000000  0.000000  -0.000000)
(0.000000  0.000000  -0.000000)
(0.000000  0.000000  -0.000000)
(0.000000  0.000000  -0.000000)
(0.000000  0.000000  -0.000000)
(0.000000  0.000000  -0.000000)
(0.000000  0.000000  -0.000000)
(0.000000  0.000000  -0.000000)
(0.000000  0.000000  -0.000000)
(0.000000  0.000000  -0.000000)
(0.000000  0.000000  -0.000000)
(0.000000  0.000000  -0.000000)
(0.000000  0.000000  -0.000000)
(0.000000  0.000000  -0.000000)
(0.000000  0.000000  -0.000000)
(0.000000  0.000000  -0.000000)
(0.000000  0.000000  -0.000000)
(0.000000  0.000000  -0.000000)
(0.000000  0.000000  -0.000000)
(0.000000  0.000000  -0.000000)
(0.000000  0.000000  -0.000000)
(0.000000  0.000000  -0.000000)
(0.000000  0.000000  -0.000000)
(0.000000  0.000000  -0.000000)
(0.000000  0.000000  -0.000000)
(0.000000  0.000000  -0.000000)
(0.000000  0.000000  -0.000000)
(0.000000  0.000000  -0.000000)
(0.000000  0.000000  -0.000000)
(0.000000  0.000000  -0.000000)
(0.000000  0.000000  -0.000000)
(0.000000  0.000000  -0.000000)
(0.000000  0.000000  -0.000000)
(0.000000  0.000000  -0.000000)
(0.000000  0.000000  -0.000000)
(0.000000  0.000000  -0.000000)
(0.000000  0.000000  -0.000000)
(0.000000  0.000000  -0.000000)
(0.000000  0.000000  -0.000000)
(0.000000  0.000000  -0.000000)
(0.000000  0.000000  -0.000000)
(0.000000  0.000000  -0.000000)
(0.000000  0.000000  -0.000000)
(0.000000  0.000000  -0.000000)
(0.000000  0.000000  -0.000000)
(0.000000  0.000000  -0.000000)
(0.000000  0.000000  -0.000000)
(0.000000  0.000000  -0.000000)
(0.000000  0.000000  -0.000000)
(0.000000  0.000000  -0.000000)
(0.000000  0.000000  -0.000000)
(0.000000  0.000000  -0.000000)
(0.000000  0.000000  -0.000000)
(0.000000  0.000000  -0.000000)
(0.000000  0.000000  -0.000000)
(0.000000  0.000000  -0.000000)
(0.000000  0.000000  -0.000000)
(0.000000  0.000000  -0.000000)
(0.000000  0.000000  -0.000000)
(0.000000  0.000000  -0.000000)
(0.000000  0.000000  -0.000000)
(0.000000  0.000000  -0.000000)
(0.000000  0.000000  -0.000000)
(0.000000  0.000000  -0.000000)
(0.000000  0.000000  -0.000000)
(0.000000  0.000000  -0.000000)
(0.000000  0.000000  -0.000000)
(0.000000  0.000000  -0.000000)
(0.000000  0.000000  -0.000000)
(0.000000  0.000000  -0.000000)
(0.000000  0.000000  -0.000000)
(0.000000  0.000000  -0.000000)
(0.000000  0.000000  -0.000000)
(0.000000  0.000000  -0.000000)
(0.000000  0.000000  -0.000000)
(0.000000  0.000000  -0.000000)
(0.000000  0.000000  -0.000000)
(0.000000  0.000000  -0.000000)
(0.000000  0.000000  -0.000000)
(0.000000  0.000000  -0.000000)
(0.000000  0.000000  -0.000000)
(0.000000  0.000000  -0.000000)
(0.000000  0.000000  -0.000000)
(0.000000  0.000000  -0.000000)
(0.000000  0.000000  -0.000000)
(0.000000  0.000000  -0.000000)
(0.000000  0.000000  -0.000000)
(0.000000  0.000000  -0.000000)
(0.000000  0.000000  -0.000000)
(0.000000  0.000000  -0.000000)
(0.000000  0.000000  -0.000000)
(0.000000  0.000000  -0.000000)
(0.000000  0.000000  -0.000000)
(0.000000  0.000000  -0.000000)
(0.000000  0.000000  -0.000000)
(0.000000  0.000000  -0.000000)
(0.000000  0.000000  -0.000000)
(0.000000  0.000000  -0.000000)
(0.000000  0.000000  -0.000000)
(0.000000  0.000000  -0.000000)
(0.000000  0.000000  -0.000000)
(0.000000  0.000000  -0.000000)
(0.000000  0.000000  -0.000000)
(0.000000  0.000000  -0.000000)
(0.000000  0.000000  -0.000000)
(0.000000  0.000000  -0.000000)
(0.000000  0.000000  -0.000000)
(0.000000  0.000000  -0.000000)
(0.000000  0.000000  -0.000000)
(0.000000  0.000000  -0.000000)
(0.000000  0.000000  -0.000000)
(0.000000  0.000000  -0.000000)
(0.000000  0.000000  -0.000000)
(0.000000  0.000000  -0.000000)
(0.000001  0.000000  -0.000000)
(0.000001  0.000000  -0.000000)
(0.000001  0.000000  -0.000000)
(0.000001  0.000000  -0.000000)
(0.000001  0.000000  -0.000000)
(0.000001  0.000000  -0.000000)
(0.000001  0.000000  -0.000000)
(0.000001  0.000000  -0.000000)
(0.000001  0.000000  -0.000000)
(0.000001  0.000000  -0.000000)
(0.000001  0.000000  -0.000000)
(0.000001  0.000000  -0.000000)
(0.000001  0.000000  -0.000000)
(0.000001  0.000000  -0.000000)
(0.000002  0.000000  -0.000000)
(0.000002  0.000000  -0.000000)
(0.000002  0.000000  -0.000000)
(0.000002  0.000000  -0.000000)
(0.000002  0.000000  -0.000000)
(0.000002  0.000000  -0.000000)
(0.000003  0.000000  -0.000000)
(0.000003  0.000000  -0.000000)
(0.000003  0.000000  -0.000000)
(0.000003  0.000000  -0.000000)
(0.000004  0.000000  -0.000000)
(0.000004  0.000000  -0.000000)
(0.000004  0.000000  -0.000001)
(0.000005  0.000000  -0.000001)
(0.000005  0.000000  -0.000001)
(0.000005  0.000000  -0.000001)
(0.000006  0.000000  -0.000001)
(0.000006  0.000000  -0.000001)
(0.000007  0.000000  -0.000001)
(0.000008  0.000000  -0.000001)
(0.000008  0.000000  -0.000001)
(0.000009  0.000000  -0.000001)
(0.000010  0.000000  -0.000001)
(0.000010  0.000000  -0.000001)
(0.000011  0.000000  -0.000001)
(0.000012  0.000000  -0.000001)
(0.000013  0.000000  -0.000002)
(0.000015  0.000000  -0.000002)
(0.000016  0.000000  -0.000002)
(0.000017  0.000000  -0.000002)
(0.000019  0.000000  -0.000002)
(0.000020  0.000000  -0.000002)
(0.000022  0.000000  -0.000003)
(0.000024  0.000000  -0.000003)
(0.000026  0.000000  -0.000003)
(0.000028  0.000000  -0.000003)
(0.000030  0.000000  -0.000004)
(0.000033  0.000000  -0.000004)
(0.000036  0.000000  -0.000004)
(0.000039  0.000000  -0.000005)
(0.000042  0.000000  -0.000005)
(0.000046  0.000000  -0.000005)
(0.000049  0.000000  -0.000006)
(0.000054  0.000000  -0.000006)
(0.000058  0.000000  -0.000007)
(0.000063  0.000000  -0.000007)
(0.000069  0.000000  -0.000008)
(0.000074  0.000000  -0.000009)
(0.000081  0.000000  -0.000010)
(0.000088  0.000000  -0.000010)
(0.000095  0.000000  -0.000011)
(0.000103  0.000000  -0.000012)
(0.000112  0.000000  -0.000013)
(0.000121  0.000000  -0.000014)
(0.000132  0.000000  -0.000015)
(0.000143  0.000000  -0.000017)
(0.000155  0.000000  -0.000018)
(0.000168  0.000000  -0.000020)
(0.000182  0.000000  -0.000021)
(0.000198  0.000000  -0.000023)
(0.000214  0.000000  -0.000025)
(0.000233  0.000000  -0.000027)
(0.000252  0.000000  -0.000030)
(0.000274  0.000000  -0.000032)
(0.000297  0.000000  -0.000035)
(0.000322  0.000000  -0.000038)
(0.000349  0.000000  -0.000041)
(0.000378  0.000000  -0.000044)
(0.000410  0.000000  -0.000048)
(0.000444  0.000000  -0.000052)
(0.000482  0.000000  -0.000056)
(0.000522  0.000000  -0.000061)
(0.000566  0.000000  -0.000066)
(0.000613  0.000000  -0.000071)
(0.000664  0.000000  -0.000077)
(0.000719  0.000000  -0.000083)
(0.000779  0.000000  -0.000090)
(0.000844  0.000000  -0.000097)
(0.000914  0.000000  -0.000105)
(0.000989  0.000000  -0.000113)
(0.001071  0.000000  -0.000122)
(0.001159  0.000000  -0.000132)
(0.001254  0.000000  -0.000142)
(0.001356  0.000000  -0.000154)
(0.001467  0.000000  -0.000166)
(0.001586  0.000000  -0.000178)
(0.001714  0.000000  -0.000192)
(0.001853  0.000000  -0.000207)
(0.002001  0.000000  -0.000223)
(0.002162  0.000000  -0.000239)
(0.002334  0.000000  -0.000257)
(0.002518  0.000000  -0.000276)
(0.002717  0.000000  -0.000296)
(0.002929  0.000000  -0.000317)
(0.003157  0.000000  -0.000340)
(0.003402  0.000000  -0.000364)
(0.003663  0.000000  -0.000389)
(0.003942  0.000000  -0.000416)
(0.004240  0.000000  -0.000443)
(0.004558  0.000000  -0.000473)
(0.004897  0.000000  -0.000503)
(0.005257  0.000000  -0.000535)
(0.005640  0.000000  -0.000568)
(0.006047  0.000000  -0.000603)
(0.006478  0.000000  -0.000638)
(0.006934  0.000000  -0.000675)
(0.007416  0.000000  -0.000712)
(0.007925  0.000000  -0.000751)
(0.008460  0.000000  -0.000790)
(0.009023  0.000000  -0.000829)
(0.009614  0.000000  -0.000869)
(0.010232  0.000000  -0.000909)
(0.010878  0.000000  -0.000948)
(0.011552  0.000000  -0.000987)
(0.012253  0.000000  -0.001026)
(0.012980  0.000000  -0.001063)
(0.013732  0.000000  -0.001098)
(0.014509  0.000000  -0.001132)
(0.015309  0.000000  -0.001163)
(0.016129  0.000000  -0.001192)
(0.016969  0.000000  -0.001217)
(0.017825  0.000000  -0.001238)
(0.018695  0.000000  -0.001256)
(0.019576  0.000000  -0.001269)
(0.020464  0.000000  -0.001277)
(0.021356  0.000000  -0.001280)
(0.022249  0.000000  -0.001277)
(0.023137  0.000000  -0.001268)
(0.024017  0.000000  -0.001253)
(0.024885  0.000000  -0.001231)
(0.025734  0.000000  -0.001202)
(0.026562  0.000000  -0.001167)
(0.027362  0.000000  -0.001124)
(0.028131  0.000000  -0.001075)
(0.028863  0.000000  -0.001019)
(0.029553  0.000000  -0.000956)
(0.030197  0.000000  -0.000886)
(0.030791  0.000000  -0.000811)
(0.031330  0.000000  -0.000730)
(0.031810  0.000000  -0.000644)
(0.032229  0.000000  -0.000553)
(0.032583  0.000000  -0.000458)
(0.032869  0.000000  -0.000360)
(0.033086  0.000000  -0.000259)
(0.033231  0.000000  -0.000156)
(0.033304  0.000000  -0.000052)
(0.033304  0.000000  0.000052)
(0.033231  0.000000  0.000156)
(0.033086  0.000000  0.000259)
(0.032869  0.000000  0.000360)
(0.032583  0.000000  0.000458)
(0.032229  0.000000  0.000553)
(0.031810  0.000000  0.000644)
(0.031330  0.000000  0.000730)
(0.030791  0.000000  0.000811)
(0.030197  0.000000  0.000886)
(0.029553  0.000000  0.000956)
(0.028863  0.000000  0.001019)
(0.028131  0.000000  0.001075)
(0.027362  0.000000  0.001124)
(0.026562  0.000000  0.001167)
(0.025734  0.000000  0.001202)
(0.024885  0.000000  0.001231)
(0.024017  0.000000  0.001253)
(0.023137  0.000000  0.001268)
(0.022249  0.000000  0.001277)
(0.021356  0.000000  0.001280)
(0.020464  0.000000  0.001277)
(0.019576  0.000000  0.001269)
(0.018695  0.000000  0.001256)
(0.017825  0.000000  0.001238)
(0.016969  0.000000  0.001217)
(0.016129  0.000000  0.001192)
(0.015309  0.000000  0.001163)
(0.014509  0.000000  0.001132)
(0.013732  0.000000  0.001098)
(0.012980  0.000000  0.001063)
(0.012253  0.000000  0.001026)
(0.011552  0.000000  0.000987)
(0.010878  0.000000  0.000948)
(0.010232  0.000000  0.000909)
(0.009614  0.000000  0.000869)
(0.009023  0.000000  0.000829)
(0.008460  0.000000  0.000790)
(0.007925  0.000000  0.000751)
(0.007416  0.000000  0.000712)
(0.006934  0.000000  0.000675)
(0.006478  0.000000  0.000638)
(0.006047  0.000000  0.000603)
(0.005640  0.000000  0.000568)
(0.005257  0.000000  0.000535)
(0.004897  0.000000  0.000503)
(0.004558  0.000000  0.000473)
(0.004240  0.000000  0.000443)
(0.003942  0.000000  0.000416)
(0.003663  0.000000  0.000389)
(0.003402  0.000000  0.000364)
(0.003157  0.000000  0.000340)
(0.002929  0.000000  0.000317)
(0.002717  0.000000  0.000296)
(0.002518  0.000000  0.000276)
(0.002334  0.000000  0.000257)
(0.002162  0.000000  0.000239)
(0.002001  0.000000  0.000223)
(0.001853  0.000000  0.000207)
(0.001714  0.000000  0.000192)
(0.001586  0.000000  0.000178)
(0.001467  0.000000  0.000166)
(0.001356  0.000000  0.000154)
(0.001254  0.000000  0.000142)
(0.001159  0.000000  0.000132)
(0.001071  0.000000  0.000122)
(0.000989  0.000000  0.000113)
(0.000914  0.000000  0.000105)
(0.000844  0.000000  0.000097)
(0.000779  0.000000  0.000090)
(0.000719  0.000000  0.000083)
(0.000664  0.000000  0.000077)
(0.000613  0.000000  0.000071)
(0.000566  0.000000  0.000066)
(0.000522  0.000000  0.000061)
(0.000482  0.000000  0.000056)
(0.000444  0.000000  0.000052)
(0.000410  0.000000  0.000048)
(0.000378  0.000000  0.000044)
(0.000349  0.000000  0.000041)
(0.000322  0.000000  0.000038)
(0.000297  0.000000  0.000035)
(0.000274  0.000000  0.000032)
(0.000252  0.000000  0.000030)
(0.000233  0.000000  0.000027)
(0.000214  0.000000  0.000025)
(0.000198  0.000000  0.000023)
(0.000182  0.000000  0.000021)
(0.000168  0.000000  0.000020)
(0.000155  0.000000  0.000018)
(0.000143  0.000000  0.000017)
(0.000132  0.000000  0.000015)
(0.000121  0.000000  0.000014)
(0.000112  0.000000  0.000013)
(0.000103  0.000000  0.000012)
(0.000095  0.000000  0.000011)
(0.000088  0.000000  0.000010)
(0.000081  0.000000  0.000010)
(0.000074  0.000000  0.000009)
(0.000069  0.000000  0.000008)
(0.000063  0.000000  0.000007)
(0.000058  0.000000  0.000007)
(0.000054  0.000000  0.000006)
(0.000049  0.000000  0.000006)
(0.000046  0.000000  0.000005)
(0.000042  0.000000  0.000005)
(0.000039  0.000000  0.000005)
(0.000036  0.000000  0.000004)
(0.000033  0.000000  0.000004)
(0.000030  0.000000  0.000004)
(0.000028  0.000000  0.000003)
(0.000026  0.000000  0.000003)
(0.000024  0.000000  0.000003)
(0.000022  0.000000  0.000003)
(0.000020  0.000000  0.000002)
(0.000019  0.000000  0.000002)
(0.000017  0.000000  0.000002)
(0.000016  0.000000  0.000002)
(0.000015  0.000000  0.000002)
(0.000013  0.000000  0.000002)
(0.000012  0.000000  0.000001)
(0.000011  0.000000  0.000001)
(0.000010  0.000000  0.000001)
(0.000010  0.000000  0.000001)
(0.000009  0.000000  0.000001)
(-0.000000  0.000000  -0.000000)
(-0.000000  0.000000  0.000000)
(-0.000000  0.000000  -0.000000)
(-0.000000  0.000000  0.000000)
(-0.000000  0.000000  -0.000000)
(-0.000000  0.000000  -0.000000)
(-0.000000  0.000000  -0.000000)
(-0.000000  0.000000  0.000000)
(-0.000000  0.000000  0.000000)
(-0.000000  0.000000  -0.000000)
(-0.000000  0.000000  -0.000000)
(-0.000000  0.000000  0.000000)
(-0.000000  0.000000  0.000000)
(-0.000000  0.000000  0.000000)
(-0.000000  0.000000  -0.000000)
(-0.000000  0.000000  -0.000000)
(-0.000000  0.000000  0.000000)
(-0.000000  0.000000  -0.000000)
(-0.000000  0.000000  0.000000)
(-0.000000  0.000000  -0.000000)
(-0.000000  0.000000  0.000000)
(0.000000  0.000000  -0.000000)
(0.000000  0.000000  0.000000)
(-0.000000  0.000000  0.000000)
(0.000000  0.000000  0.000000)
(0.000000  0.000000  0.000000)
(0.000000  0.000000  -0.000000)
(0.000000  0.000000  0.000000)
(0.000000  0.000000  0.000000)
(0.000000  0.000000  -0.000000)
(0.000000  0.000000  0.000000)
(0.000000  0.000000  -0.000000)
(0.000000  0.000000  -0.000000)
(0.000000  0.000000  0.000000)
(0.000000  0.000000  -0.000000)
(0.000000  0.000000  -0.000000)
(0.000000  0.000000  0.000000)
(0.000000  0.000000  -0.000000)
(0.000000  0.000000  0.000000)
(0.000000  0.000000  0.000000)
(0.000000  0.000000  -0.000000)
(0.000000  0.000000  0.000000)
(0.000000  0.000000  -0.000000)
(0.000000  0.000000  0.000000)
(0.000000  0.000000  -0.000000)
(0.000000  0.000000  0.000000)
(0.000000  0.000000  -0.000000)
(0.000000  0.000000  -0.000000)
(0.000000  0.000000  0.000000)
(0.000000  0.000000  0.000000)
(0.000000  0.000000  -0.000000)
(0.000000  0.000000  0.000000)
(0.000000  0.000000  -0.000000)
(0.000000  0.000000  0.000000)
(0.000000  0.000000  -0.000000)
(0.000000  0.000000  0.000000)
(0.000000  0.000000  -0.000000)
(0.000000  0.000000  0.000000)
(0.000000  0.000000  0.000000)
(0.000000  0.000000  0.000000)
(0.000000  0.000000  -0.000000)
(0.000000  0.000000  0.000000)
(0.000000  0.000000  -0.000000)
(0.000000  0.000000  0.000000)
(0.000000  0.000000  -0.000000)
(0.000000  0.000000  0.000000)
(0.000000  0.000000  0.000000)
(0.000000  0.000000  -0.000000)
(0.000000  0.000000  0.000000)
(0.000000  0.000000  -0.000000)
(0.000000  0.000000  -0.000000)
(0.000000  0.000000  0.000000)
(0.000000  0.000000  0.000000)
(0.000000  0.000000  0.000000)
(0.000000  0.000000  -0.000000)
(0.000000  0.000000  -0.000000)
(0.000000  0.000000  0.000000)
(0.000000  0.000000  -0.000000)
(0.000000  0.000000  0.000000)
(0.000000  0.000000  -0.000000)
(0.000000  0.000000  -0.000000)
(0.000000  0.000000  0.000000)
(0.000000  0.000000  -0.000000)
(0.000000  0.000000  0.000000)
(0.000000  0.000000  -0.000000)
(0.000000  0.000000  0.000000)
(0.000000  0.000000  -0.000000)
(0.000000  0.000000  0.000000)
(0.000000  0.000000  0.000000)
(0.000000  0.000000  -0.000000)
(0.000000  0.000000  0.000000)
(0.000000  0.000000  -0.000000)
(0.000000  0.000000  -0.000000)
(0.000000  0.000000  0.000000)
(0.000000  0.000000  -0.000000)
(0.000000  0.000000  -0.000000)
(0.000000  0.000000  -0.000000)
(0.000000  0.000000  0.000000)
(0.000000  0.000000  -0.000000)
(0.000000  0.000000  0.000000)
(0.000000  0.000000  -0.000000)
(0.000000  0.000000  0.000000)
(0.000000  0.000000  -0.000000)
(0.000000  0.000000  0.000000)
(0.000000  0.000000  -0.000000)
(0.000000  0.000000  0.000000)
(0.000000  0.000000  -0.000000)
(0.000000  0.000000  0.000000)
(0.000000  0.000000  -0.000000)
(0.000000  0.000000  0.000000)
(0.000000  0.000000  -0.000000)
(0.000000  0.000000  0.000000)
(0.000000  0.000000  -0.000000)
(0.000000  0.000000  0.000000)
(0.000000  0.000000  -0.000000)
(0.000000  0.000000  0.000000)
(0.000000  0.000000  -0.000000)
(0.000000  0.000000  0.000000)
(0.000000  0.000000  -0.000000)
(0.000000  0.000000  0.000000)
(0.000000  0.000000  0.000000)
(0.000000  0.000000  -0.000000)
(0.000000  0.000000  -0.000000)
(0.000000  0.000000  0.000000)
(0.000000  0.000000  -0.000000)
(0.000000  0.000000  0.000000)
(0.000000  0.000000  0.000000)
(0.000000  0.000000  -0.000000)
(0.000000  0.000000  0.000000)
(0.000000  0.000000  -0.000000)
(0.000000  0.000000  0.000000)
(0.000000  0.000000  -0.000000)
(0.000000  0.000000  0.000000)
(0.000000  0.000000  0.000000)
(0.000000  0.000000  0.000000)
(0.000000  0.000000  -0.000000)
(0.000000  0.000000  0.000000)
(0.000000  0.000000  -0.000000)
(0.000000  0.000000  -0.000000)
(0.000000  0.000000  0.000000)
(0.000000  0.000000  0.000000)
(0.000000  0.000000  -0.000000)
(0.000000  0.000000  0.000000)
(0.000000  0.000000  -0.000000)
(0.000000  0.000000  0.000000)
(0.000000  0.000000  -0.000000)
(0.000000  0.000000  0.000000)
(0.000000  0.000000  0.000000)
(0.000000  0.000000  -0.000000)
(0.000000  0.000000  -0.000000)
(0.000000  0.000000  0.000000)
(0.000000  0.000000  -0.000000)
(0.000000  0.000000  0.000000)
(0.000000  0.000000  0.000000)
(0.000000  0.000000  0.000000)
(0.000000  0.000000  -0.000000)
(0.000000  0.000000  -0.000000)
(0.000000  0.000000  -0.000000)
(0.000000  0.000000  0.000000)
(0.000000  0.000000  -0.000000)
(0.000000  0.000000  0.000000)
(0.000000  0.000000  -0.000000)
(0.000000  0.000000  0.000000)
(0.000000  0.000000  -0.000000)
(0.000000  0.000000  -0.000000)
(0.000000  0.000000  0.000000)
(0.000000  0.000000  -0.000000)
(0.000000  0.000000  0.000000)
(0.000000  0.000000  -0.000000)
(0.000000  0.000000  -0.000000)
(0.000000  0.000000  -0.000000)
(0.000000  0.000000  -0.000000)
(0.000000  0.000000  -0.000000)
(0.000000  0.000000  0.000000)
(0.000000  0.000000  -0.000000)
(0.000000  0.000000  0.000000)
(0.000000  0.000000  -0.000000)
(0.000000  0.000000  -0.000000)
(0.000000  0.000000  -0.000000)
(0.000000  0.000000  -0.000000)
(0.000000  0.000000  -0.000000)
(0.000000  0.000000  -0.000000)
(0.000000  0.000000  -0.000000)
(0.000000  0.000000  -0.000000)
(0.000000  0.000000  -0.000000)
(0.000000  0.000000  -0.000000)
(0.000000  0.000000  -0.000000)
(0.000000  0.000000  -0.000000)
(0.000000  0.000000  -0.000000)
(0.000000  0.000000  -0.000000)
(0.000000  0.000000  -0.000000)
(0.000000  0.000000  -0.000000)
(0.000000  0.000000  -0.000000)
(0.000000  0.000000  -0.000000)
(0.000000  0.000000  -0.000000)
(0.000000  0.000000  -0.000000)
(0.000000  0.000000  -0.000000)
(0.000000  0.000000  -0.000000)
(0.000000  0.000000  -0.000000)
(0.000000  0.000000  -0.000000)
(0.000000  0.000000  -0.000000)
(0.000000  0.000000  -0.000000)
(0.000000  0.000000  -0.000000)
(0.000000  0.000000  -0.000000)
(0.000000  0.000000  -0.000000)
(0.000000  0.000000  -0.000000)
(0.000000  0.000000  -0.000000)
(0.000000  0.000000  -0.000000)
(0.000000  0.000000  -0.000000)
(0.000000  0.000000  -0.000000)
(0.000000  0.000000  -0.000000)
(0.000000  0.000000  -0.000000)
(0.000000  0.000000  -0.000000)
(0.000000  0.000000  -0.000000)
(0.000000  0.000000  -0.000000)
(0.000000  0.000000  -0.000000)
(0.000000  0.000000  -0.000000)
(0.000000  0.000000  -0.000000)
(0.000000  0.000000  -0.000000)
(0.000000  0.000000  -0.000000)
(0.000000  0.000000  -0.000000)
(0.000000  0.000000  -0.000000)
(0.000000  0.000000  -0.000000)
(0.000000  0.000000  -0.000000)
(0.000000  0.000000  -0.000000)
(0.000000  0.000000  -0.000000)
(0.000000  0.000000  -0.000000)
(0.000000  0.000000  -0.000000)
(0.000000  0.000000  -0.000000)
(0.000000  0.000000  -0.000000)
(0.000000  0.000000  -0.000000)
(0.000000  0.000000  -0.000000)
(0.000000  0.000000  -0.000000)
(0.000000  0.000000  -0.000000)
(0.000000  0.000000  -0.000000)
(0.000000  0.000000  -0.000000)
(0.000000  0.000000  -0.000000)
(0.000000  0.000000  -0.000000)
(0.000000  0.000000  -0.000000)
(0.000000  0.000000  -0.000000)
(0.000000  0.000000  -0.000000)
(0.000000  0.000000  -0.000000)
(0.000000  0.000000  -0.000000)
(0.000000  0.000000  -0.000000)
(0.000000  0.000000  -0.000000)
(0.000000  0.000000  -0.000000)
(0.000000  0.000000  -0.000000)
(0.000000  0.000000  -0.000000)
(0.000000  0.000000  -0.000000)
(0.000000  0.000000  -0.000000)
(0.000000  0.000000  -0.000000)
(0.000000  0.000000  -0.000000)
(0.000000  0.000000  -0.000000)
(0.000000  0.000000  -0.000000)
(0.000000  0.000000  -0.000000)
(0.000000  0.000000  -0.000000)
(0.000000  0.000000  -0.000000)
(0.000000  0.000000  -0.000000)
(0.000000  0.000000  -0.000000)
(0.000000  0.000000  -0.000000)
(0.000000  0.000000  -0.000000)
(0.000000  0.000000  -0.000000)
(0.000000  0.000000  -0.000000)
(0.000000  0.000000  -0.000000)
(0.000000  0.000000  -0.000000)
(0.000000  0.000000  -0.000000)
(0.000000  0.000000  -0.000000)
(0.000000  0.000000  -0.000000)
(0.000000  0.000000  -0.000000)
(0.000000  0.000000  -0.000000)
(0.000000  0.000000  -0.000000)
(0.000000  0.000000  -0.000000)
(0.000000  0.000000  -0.000000)
(0.000000  0.000000  -0.000000)
(0.000000  0.000000  -0.000000)
(0.000000  0.000000  -0.000000)
(0.000000  0.000000  -0.000000)
(0.000000  0.000000  -0.000000)
(0.000000  0.000000  -0.000000)
(0.000000  0.000000  -0.000000)
(0.000000  0.000000  -0.000000)
(0.000000  0.000000  -0.000000)
(0.000000  0.000000  -0.000000)
(0.000000  0.000000  -0.000000)
(0.000000  0.000000  -0.000000)
(0.000000  0.000000  -0.000000)
(0.000000  0.000000  -0.000000)
(0.000000  0.000000  -0.000000)
(0.000000  0.000000  -0.000000)
(0.000000  0.000000  -0.000000)
(0.000000  0.000000  -0.000000)
(0.000000  0.000000  -0.000000)
(0.000000  0.000000  -0.000000)
(0.000000  0.000000  -0.000000)
(0.000000  0.000000  -0.000000)
(0.000000  0.000000  -0.000000)
(0.000000  0.000000  -0.000000)
(0.000000  0.000000  -0.000000)
(0.000000  0.000000  -0.000000)
(0.000000  0.000000  -0.000000)
(0.000000  0.000000  -0.000000)
(0.000000  0.000000  -0.000000)
(0.000000  0.000000  -0.000000)
(0.000000  0.000000  -0.000000)
(0.000000  0.000000  -0.000000)
(0.000000  0.000000  -0.000000)
(0.000000  0.000000  -0.000000)
(0.000000  0.000000  -0.000000)
(0.000000  0.000000  -0.000000)
(0.000000  0.000000  -0.000000)
(0.000000  0.000000  -0.000000)
(0.000000  0.000000  -0.000000)
(0.000000  0.000000  -0.000000)
(0.000000  0.000000  -0.000000)
(0.000000  0.000000  -0.000000)
(0.000000  0.000000  -0.000000)
(0.000000  0.000000  -0.000000)
(0.000000  0.000000  -0.000000)
(0.000000  0.000000  -0.000000)
(0.000000  0.000000  -0.000000)
(0.000000  0.000000  -0.000000)
(0.000000  0.000000  -0.000000)
(0.000000  0.000000  -0.000000)
(0.000000  0.000000  -0.000000)
(0.000000  0.000000  -0.000000)
(0.000000  0.000000  -0.000000)
(0.000000  0.000000  -0.000000)
(0.000000  0.000000  -0.000000)
(0.000000  0.000000  -0.000000)
(0.000000  0.000000  -0.000000)
(0.000000  0.000000  -0.000000)
(0.000000  0.000000  -0.000000)
(0.000000  0.000000  -0.000000)
(0.000000  0.000000  -0.000000)
(0.000000  0.000000  -0.000000)
(0.000000  0.000000  -0.000000)
(0.000000  0.000000  -0.000000)
(0.000000  0.000000  -0.000000)
(0.000000  0.000000  -0.000000)
(0.000000  0.000000  -0.000000)
(0.000000  0.000000  -0.000000)
(0.000000  0.000000  -0.000000)
(0.000000  0.000000  -0.000000)
(0.000000  0.000000  -0.000000)
(0.000000  0.000000  -0.000000)
(0.000000  0.000000  -0.000000)
(0.000000  0.000000  -0.000000)
(0.000000  0.000000  -0.000000)
(0.000000  0.000000  -0.000000)
(0.000000  0.000000  -0.000000)
(0.000000  0.000000  -0.000000)
(0.000000  0.000000  -0.000000)
(0.000000  0.000000  -0.000000)
(0.000000  0.000000  -0.000000)
(0.000000  0.000000  -0.000000)
(0.000000  0.000000  -0.000000)
(0.000000  0.000000  -0.000000)
(0.000000  0.000000  -0.000000)
(0.000000  0.000000  -0.000000)
(0.000000  0.000000  -0.000000)
(0.000000  0.000000  -0.000000)
(0.000000  0.000000  -0.000000)
(0.000000  0.000000  -0.000000)
(0.000000  0.000000  -0.000000)
(0.000000  0.000000  -0.000000)
(0.000000  0.000000  -0.000000)
(0.000000  0.000000  -0.000000)
(0.000000  0.000000  -0.000000)
(0.000000  0.000000  -0.000000)
(0.000000  0.000000  -0.000000)
(0.000000  0.000000  -0.000000)
(0.000000  0.000000  -0.000000)
(0.000000  0.000000  -0.000000)
(0.000000  0.000000  -0.000000)
(0.000000  0.000000  -0.000000)
(0.000000  0.000000  -0.000000)
(0.000000  0.000000  -0.000000)
(0.000000  0.000000  -0.000000)
(0.000000  0.000000  -0.000000)
(0.000000  0.000000  -0.000000)
(0.000000  0.000000  -0.000000)
(0.000000  0.000000  -0.000000)
(0.000000  0.000000  -0.000000)
(0.000000  0.000000  -0.000000)
(0.000000  0.000000  -0.000000)
(0.000000  0.000000  -0.000000)
(0.000000  0.000000  -0.000000)
(0.000000  0.000000  -0.000000)
(0.000000  0.000000  -0.000000)
(0.000000  0.000000  -0.000000)
(0.000000  0.000000  -0.000000)
(0.000000  0.000000  -0.000000)
(0.000000  0.000000  -0.000000)
(0.000000  0.000000  -0.000000)
(0.000000  0.000000  -0.000000)
(0.000000  0.000000  -0.000000)
(0.000000  0.000000  -0.000000)
(0.000000  0.000000  -0.000000)
(0.000000  0.000000  -0.000000)
(0.000000  0.000000  -0.000000)
(0.000000  0.000000  -0.000000)
(0.000000  0.000000  -0.000000)
(0.000000  0.000000  -0.000000)
(0.000000  0.000000  -0.000000)
(0.000000  0.000000  -0.000000)
(0.000000  0.000000  -0.000000)
(0.000000  0.000000  -0.000000)
(0.000000  0.000000  -0.000000)
(0.000000  0.000000  -0.000000)
(0.000000  0.000000  -0.000000)
(0.000000  0.000000  -0.000000)
(0.000000  0.000000  -0.000000)
(0.000000  0.000000  -0.000000)
(0.000000  0.000000  -0.000000)
(0.000000  0.000000  -0.000000)
(0.000000  0.000000  -0.000000)
(0.000000  0.000000  -0.000000)
(0.000000  0.000000  -0.000000)
(0.000000  0.000000  -0.000000)
(0.000000  0.000000  -0.000000)
(0.000000  0.000000  -0.000000)
(0.000000  0.000000  -0.000000)
(0.000000  0.000000  -0.000000)
(0.000000  0.000000  -0.000000)
(0.000000  0.000000  -0.000000)
(0.000000  0.000000  -0.000000)
(0.000000  0.000000  -0.000000)
(0.000000  0.000000  -0.000000)
(0.000000  0.000000  -0.000000)
(0.000000  0.000000  -0.000000)
(0.000000  0.000000  -0.000000)
(0.000000  0.000000  -0.000000)
(0.000000  0.000000  -0.000000)
(0.000000  0.000000  -0.000000)
(0.000000  0.000000  -0.000000)
(0.000000  0.000000  -0.000000)
(0.000000  0.000000  -0.000000)
(0.000000  0.000000  -0.000000)
(0.000000  0.000000  -0.000000)
(0.000000  0.000000  -0.000000)
(0.000000  0.000000  -0.000000)
(0.000000  0.000000  -0.000000)
(0.000000  0.000000  -0.000000)
(0.000000  0.000000  -0.000000)
(0.000000  0.000000  -0.000000)
(0.000000  0.000000  -0.000000)
(0.000000  0.000000  -0.000000)
(0.000000  0.000000  -0.000000)
(0.000000  0.000000  -0.000000)
(0.000000  0.000000  -0.000000)
(0.000000  0.000000  -0.000000)
(0.000000  0.000000  -0.000000)
(0.000000  0.000000  -0.000000)
(0.000000  0.000000  -0.000000)
(0.000000  0.000000  -0.000000)
(0.000000  0.000000  -0.000000)
(0.000000  0.000000  -0.000000)
(0.000000  0.000000  -0.000000)
(0.000000  0.000000  -0.000000)
(0.000000  0.000000  -0.000000)
(0.000000  0.000000  -0.000000)
(0.000000  0.000000  -0.000000)
(0.000000  0.000000  -0.000000)
(0.000000  0.000000  -0.000000)
(0.000000  0.000000  -0.000000)
(0.000001  0.000000  -0.000000)
(0.000001  0.000000  -0.000000)
(0.000001  0.000000  -0.000000)
(0.000001  0.000000  -0.000000)
(0.000001  0.000000  -0.000000)
(0.000001  0.000000  -0.000000)
(0.000001  0.000000  -0.000000)
(0.000001  0.000000  -0.000000)
(0.000001  0.000000  -0.000000)
(0.000001  0.000000  -0.000000)
(0.000001  0.000000  -0.000000)
(0.000001  0.000000  -0.000000)
(0.000001  0.000000  -0.000000)
(0.000001  0.000000  -0.000000)
(0.000002  0.000000  -0.000000)
(0.000002  0.000000  -0.000000)
(0.000002  0.000000  -0.000000)
(0.000002  0.000000  -0.000000)
(0.000002  0.000000  -0.000000)
(0.000002  0.000000  -0.000000)
(0.000003  0.000000  -0.000000)
(0.000003  0.000000  -0.000000)
(0.000003  0.000000  -0.000000)
(0.000003  0.000000  -0.000000)
(0.000004  0.000000  -0.000000)
(0.000004  0.000000  -0.000001)
(0.000004  0.000000  -0.000001)
(0.000005  0.000000  -0.000001)
(0.000005  0.000000  -0.000001)
(0.000005  0.000000  -0.000001)
(0.000006  0.000000  -0.000001)
(0.000006  0.000000  -0.000001)
(0.000007  0.000000  -0.000001)
(0.000008  0.000000  -0.000001)
(0.000008  0.000000  -0.000001)
(0.000009  0.000000  -0.000001)
(0.000010  0.000000  -0.000001)
(0.000010  0.000000  -0.000001)
(0.000011  0.000000  -0.000001)
(0.000012  0.000000  -0.000002)
(0.000013  0.000000  -0.000002)
(0.000015  0.000000  -0.000002)
(0.000016  0.000000  -0.000002)
(0.000017  0.000000  -0.000002)
(0.000019  0.000000  -0.000002)
(0.000020  0.000000  -0.000003)
(0.000022  0.000000  -0.000003)
(0.000024  0.000000  -0.000003)
(0.000026  0.000000  -0.000003)
(0.000028  0.000000  -0.000004)
(0.000030  0.000000  -0.000004)
(0.000033  0.000000  -0.000004)
(0.000036  0.000000  -0.000005)
(0.000039  0.000000  -0.000005)
(0.000042  0.000000  -0.000005)
(0.000046  0.000000  -0.000006)
(0.000049  0.000000  -0.000006)
(0.000054  0.000000  -0.000007)
(0.000058  0.000000  -0.000007)
(0.000063  0.000000  -0.000008)
(0.000069  0.000000  -0.000009)
(0.000074  0.000000  -0.000010)
(0.000081  0.000000  -0.000010)
(0.000087  0.000000  -0.000011)
(0.000095  0.000000  -0.000012)
(0.000103  0.000000  -0.000013)
(0.000112  0.000000  -0.000014)
(0.000121  0.000000  -0.000016)
(0.000131  0.000000  -0.000017)
(0.000143  0.000000  -0.000018)
(0.000155  0.000000  -0.000020)
(0.000168  0.000000  -0.000021)
(0.000182  0.000000  -0.000023)
(0.000197  0.000000  -0.000025)
(0.000214  0.000000  -0.000027)
(0.000232  0.000000  -0.000030)
(0.000252  0.000000  -0.000032)
(0.000273  0.000000  -0.000035)
(0.000296  0.000000  -0.000038)
(0.000321  0.000000  -0.000041)
(0.000348  0.000000  -0.000044)
(0.000378  0.000000  -0.000048)
(0.000409  0.000000  -0.000052)
(0.000444  0.000000  -0.000056)
(0.000481  0.000000  -0.000061)
(0.000521  0.000000  -0.000066)
(0.000565  0.000000  -0.000071)
(0.000612  0.000000  -0.000077)
(0.000663  0.000000  -0.000083)
(0.000718  0.000000  -0.000090)
(0.000778  0.000000  -0.000098)
(0.000843  0.000000  -0.000105)
(0.000913  0.000000  -0.000114)
(0.000988  0.000000  -0.000123)
(0.001069  0.000000  -0.000133)
(0.001157  0.000000  -0.000143)
(0.001252  0.000000  -0.000155)
(0.001355  0.000000  -0.000167)
(0.001465  0.000000  -0.000180)
(0.001584  0.000000  -0.000194)
(0.001713  0.000000  -0.000209)
(0.001851  0.000000  -0.000225)
(0.001999  0.000000  -0.000242)
(0.002159  0.000000  -0.000260)
(0.002331  0.000000  -0.000279)
(0.002516  0.000000  -0.000300)
(0.002714  0.000000  -0.000322)
(0.002927  0.000000  -0.000345)
(0.003154  0.000000  -0.000370)
(0.003398  0.000000  -0.000395)
(0.003659  0.000000  -0.000423)
(0.003938  0.000000  -0.000452)
(0.004236  0.000000  -0.000482)
(0.004554  0.000000  -0.000514)
(0.004893  0.000000  -0.000547)
(0.005253  0.000000  -0.000582)
(0.005636  0.000000  -0.000618)
(0.006042  0.000000  -0.000655)
(0.006473  0.000000  -0.000694)
(0.006929  0.000000  -0.000733)
(0.007411  0.000000  -0.000774)
(0.007920  0.000000  -0.000816)
(0.008455  0.000000  -0.000858)
(0.009018  0.000000  -0.000901)
(0.009608  0.000000  -0.000945)
(0.010227  0.000000  -0.000988)
(0.010873  0.000000  -0.001031)
(0.011547  0.000000  -0.001073)
(0.012248  0.000000  -0.001115)
(0.012975  0.000000  -0.001155)
(0.013728  0.000000  -0.001194)
(0.014505  0.000000  -0.001230)
(0.015305  0.000000  -0.001264)
(0.016126  0.000000  -0.001295)
(0.016966  0.000000  -0.001323)
(0.017822  0.000000  -0.001346)
(0.018693  0.000000  -0.001365)
(0.019574  0.000000  -0.001380)
(0.020463  0.000000  -0.001388)
(0.021356  0.000000  -0.001391)
(0.022249  0.000000  -0.001388)
(0.023139  0.000000  -0.001379)
(0.024020  0.000000  -0.001362)
(0.024888  0.000000  -0.001338)
(0.025739  0.000000  -0.001307)
(0.026567  0.000000  -0.001268)
(0.027368  0.000000  -0.001222)
(0.028138  0.000000  -0.001169)
(0.028870  0.000000  -0.001108)
(0.029561  0.000000  -0.001039)
(0.030206  0.000000  -0.000964)
(0.030801  0.000000  -0.000882)
(0.031340  0.000000  -0.000794)
(0.031822  0.000000  -0.000700)
(0.032241  0.000000  -0.000602)
(0.032595  0.000000  -0.000498)
(0.032882  0.000000  -0.000392)
(0.033099  0.000000  -0.000282)
(0.033245  0.000000  -0.000170)
(0.033318  0.000000  -0.000057)
(0.033318  0.000000  0.000057)
(0.033245  0.000000  0.000170)
(0.033099  0.000000  0.000282)
(0.032882  0.000000  0.000392)
(0.032595  0.000000  0.000498)
(0.032241  0.000000  0.000602)
(0.031822  0.000000  0.000700)
(0.031340  0.000000  0.000794)
(0.030801  0.000000  0.000882)
(0.030206  0.000000  0.000964)
(0.029561  0.000000  0.001039)
(0.028870  0.000000  0.001108)
(0.028138  0.000000  0.001169)
(0.027368  0.000000  0.001222)
(0.026567  0.000000  0.001268)
(0.025739  0.000000  0.001307)
(0.024888  0.000000  0.001338)
(0.024020  0.000000  0.001362)
(0.023139  0.000000  0.001379)
(0.022249  0.000000  0.001388)
(0.021356  0.000000  0.001391)
(0.020463  0.000000  0.001388)
(0.019574  0.000000  0.001380)
(0.018693  0.000000  0.001365)
(0.017822  0.000000  0.001346)
(0.016966  0.000000  0.001323)
(0.016126  0.000000  0.001295)
(0.015305  0.000000  0.001264)
(0.014505  0.000000  0.001230)
(0.013728  0.000000  0.001194)
(0.012975  0.000000  0.001155)
(0.012248  0.000000  0.001115)
(0.011547  0.000000  0.001073)
(0.010873  0.000000  0.001031)
(0.010227  0.000000  0.000988)
(0.009608  0.000000  0.000945)
(0.009018  0.000000  0.000901)
(0.008455  0.000000  0.000858)
(0.007920  0.000000  0.000816)
(0.007411  0.000000  0.000774)
(0.006929  0.000000  0.000733)
(0.006473  0.000000  0.000694)
(0.006042  0.000000  0.000655)
(0.005636  0.000000  0.000618)
(0.005253  0.000000  0.000582)
(0.004893  0.000000  0.000547)
(0.004554  0.000000  0.000514)
(0.004236  0.000000  0.000482)
(0.003938  0.000000  0.000452)
(0.003659  0.000000  0.000423)
(0.003398  0.000000  0.000395)
(0.003154  0.000000  0.000370)
(0.002927  0.000000  0.000345)
(0.002714  0.000000  0.000322)
(0.002516  0.000000  0.000300)
(0.002331  0.000000  0.000279)
(0.002159  0.000000  0.000260)
(0.001999  0.000000  0.000242)
(0.001851  0.000000  0.000225)
(0.001713  0.000000  0.000209)
(0.001584  0.000000  0.000194)
(0.001465  0.000000  0.000180)
(0.001355  0.000000  0.000167)
(0.001252  0.000000  0.000155)
(0.001157  0.000000  0.000143)
(0.001069  0.000000  0.000133)
(0.000988  0.000000  0.000123)
(0.000913  0.000000  0.000114)
(0.000843  0.000000  0.000105)
(0.000778  0.000000  0.000098)
(0.000718  0.000000  0.000090)
(0.000663  0.000000  0.000083)
(0.000612  0.000000  0.000077)
(0.000565  0.000000  0.000071)
(0.000521  0.000000  0.000066)
(0.000481  0.000000  0.000061)
(0.000444  0.000000  0.000056)
(0.000409  0.000000  0.000052)
(0.000378  0.000000  0.000048)
(0.000348  0.000000  0.000044)
(0.000321  0.000000  0.000041)
(0.000296  0.000000  0.000038)
(0.000273  0.000000  0.000035)
(0.000252  0.000000  0.000032)
(0.000232  0.000000  0.000030)
(0.000214  0.000000  0.000027)
(0.000197  0.000000  0.000025)
(0.000182  0.000000  0.000023)
(0.000168  0.000000  0.000021)
(0.000155  0.000000  0.000020)
(0.000143  0.000000  0.000018)
(0.000131  0.000000  0.000017)
(0.000121  0.000000  0.000016)
(0.000112  0.000000  0.000014)
(0.000103  0.000000  0.000013)
(0.000095  0.000000  0.000012)
(0.000087  0.000000  0.000011)
(0.000081  0.000000  0.000010)
(0.000074  0.000000  0.000010)
(0.000069  0.000000  0.000009)
(0.000063  0.000000  0.000008)
(0.000058  0.000000  0.000007)
(0.000054  0.000000  0.000007)
(0.000049  0.000000  0.000006)
(0.000046  0.000000  0.000006)
(0.000042  0.000000  0.000005)
(0.000039  0.000000  0.000005)
(0.000036  0.000000  0.000005)
(0.000033  0.000000  0.000004)
(0.000030  0.000000  0.000004)
(0.000028  0.000000  0.000004)
(0.000026  0.000000  0.000003)
(0.000024  0.000000  0.000003)
(0.000022  0.000000  0.000003)
(0.000020  0.000000  0.000003)
(0.000019  0.000000  0.000002)
(0.000017  0.000000  0.000002)
(0.000016  0.000000  0.000002)
(0.000015  0.000000  0.000002)
(0.000013  0.000000  0.000002)
(0.000012  0.000000  0.000002)
(0.000011  0.000000  0.000001)
(0.000010  0.000000  0.000001)
(0.000010  0.000000  0.000001)
(0.000009  0.000000  0.000001)
(-0.000000  0.000000  0.000000)
(-0.000000  0.000000  -0.000000)
(-0.000000  0.000000  0.000000)
(-0.000000  0.000000  -0.000000)
(-0.000000  0.000000  -0.000000)
(-0.000000  0.000000  -0.000000)
(-0.000000  0.000000  0.000000)
(-0.000000  0.000000  0.000000)
(-0.000000  0.000000  -0.000000)
(-0.000000  0.000000  -0.000000)
(-0.000000  0.000000  0.000000)
(-0.000000  0.000000  -0.000000)
(-0.000000  0.000000  0.000000)
(-0.000000  0.000000  -0.000000)
(-0.000000  0.000000  0.000000)
(-0.000000  0.000000  -0.000000)
(-0.000000  0.000000  0.000000)
(-0.000000  0.000000  -0.000000)
(-0.000000  0.000000  -0.000000)
(-0.000000  0.000000  0.000000)
(-0.000000  0.000000  0.000000)
(-0.000000  0.000000  -0.000000)
(-0.000000  0.000000  0.000000)
(-0.000000  0.000000  -0.000000)
(-0.000000  0.000000  0.000000)
(-0.000000  0.000000  -0.000000)
(-0.000000  0.000000  0.000000)
(-0.000000  0.000000  0.000000)
(-0.000000  0.000000  -0.000000)
(-0.000000  0.000000  -0.000000)
(-0.000000  0.000000  0.000000)
(-0.000000  0.000000  -0.000000)
(-0.000000  0.000000  0.000000)
(-0.000000  0.000000  -0.000000)
(-0.000000  0.000000  0.000000)
(-0.000000  0.000000  -0.000000)
(-0.000000  0.000000  -0.000000)
(-0.000000  0.000000  0.000000)
(-0.000000  0.000000  -0.000000)
(-0.000000  0.000000  0.000000)
(-0.000000  0.000000  0.000000)
(-0.000000  0.000000  -0.000000)
(-0.000000  0.000000  0.000000)
(-0.000000  0.000000  -0.000000)
(-0.000000  0.000000  0.000000)
(-0.000000  0.000000  -0.000000)
(-0.000000  0.000000  0.000000)
(-0.000000  0.000000  0.000000)
(-0.000000  0.000000  -0.000000)
(-0.000000  0.000000  0.000000)
(-0.000000  0.000000  0.000000)
(-0.000000  0.000000  -0.000000)
(-0.000000  0.000000  0.000000)
(-0.000000  0.000000  0.000000)
(-0.000000  0.000000  -0.000000)
(-0.000000  0.000000  0.000000)
(-0.000000  0.000000  -0.000000)
(-0.000000  0.000000  0.000000)
(-0.000000  0.000000  -0.000000)
(-0.000000  0.000000  0.000000)
(-0.000000  0.000000  -0.000000)
(-0.000000  0.000000  -0.000000)
(-0.000000  0.000000  0.000000)
(-0.000000  0.000000  -0.000000)
(-0.000000  0.000000  0.000000)
(-0.000000  0.000000  -0.000000)
(-0.000000  0.000000  0.000000)
(-0.000000  0.000000  0.000000)
(-0.000000  0.000000  -0.000000)
(-0.000000  0.000000  0.000000)
(-0.000000  0.000000  0.000000)
(-0.000000  0.000000  -0.000000)
(-0.000000  0.000000  0.000000)
(-0.000000  0.000000  0.000000)
(-0.000000  0.000000  -0.000000)
(-0.000000  0.000000  -0.000000)
(-0.000000  0.000000  0.000000)
(-0.000000  0.000000  0.000000)
(-0.000000  0.000000  -0.000000)
(-0.000000  0.000000  0.000000)
(-0.000000  0.000000  -0.000000)
(-0.000000  0.000000  0.000000)
(-0.000000  0.000000  -0.000000)
(-0.000000  0.000000  0.000000)
(-0.000000  0.000000  0.000000)
(-0.000000  0.000000  -0.000000)
(-0.000000  0.000000  -0.000000)
(-0.000000  0.000000  0.000000)
(-0.000000  0.000000  -0.000000)
(-0.000000  0.000000  0.000000)
(-0.000000  0.000000  0.000000)
(-0.000000  0.000000  0.000000)
(-0.000000  0.000000  -0.000000)
(-0.000000  0.000000  0.000000)
(-0.000000  0.000000  -0.000000)
(-0.000000  0.000000  0.000000)
(-0.000000  0.000000  -0.000000)
(-0.000000  0.000000  -0.000000)
(-0.000000  0.000000  -0.000000)
(-0.000000  0.000000  0.000000)
(-0.000000  0.000000  -0.000000)
(-0.000000  0.000000  0.000000)
(-0.000000  0.000000  -0.000000)
(-0.000000  0.000000  0.000000)
(-0.000000  0.000000  0.000000)
(-0.000000  0.000000  0.000000)
(-0.000000  0.000000  -0.000000)
(-0.000000  0.000000  0.000000)
(-0.000000  0.000000  -0.000000)
(-0.000000  0.000000  0.000000)
(-0.000000  0.000000  -0.000000)
(-0.000000  0.000000  0.000000)
(-0.000000  0.000000  -0.000000)
(-0.000000  0.000000  0.000000)
(-0.000000  0.000000  -0.000000)
(-0.000000  0.000000  -0.000000)
(-0.000000  0.000000  -0.000000)
(-0.000000  0.000000  0.000000)
(-0.000000  0.000000  0.000000)
(-0.000000  0.000000  -0.000000)
(-0.000000  0.000000  0.000000)
(-0.000000  0.000000  -0.000000)
(-0.000000  0.000000  0.000000)
(-0.000000  0.000000  0.000000)
(-0.000000  0.000000  -0.000000)
(-0.000000  0.000000  -0.000000)
(-0.000000  0.000000  0.000000)
(-0.000000  0.000000  -0.000000)
(-0.000000  0.000000  -0.000000)
(-0.000000  0.000000  0.000000)
(-0.000000  0.000000  0.000000)
(-0.000000  0.000000  -0.000000)
(-0.000000  0.000000  -0.000000)
(-0.000000  0.000000  0.000000)
(-0.000000  0.000000  0.000000)
(-0.000000  0.000000  -0.000000)
(-0.000000  0.000000  0.000000)
(-0.000000  0.000000  -0.000000)
(-0.000000  0.000000  0.000000)
(-0.000000  0.000000  -0.000000)
(-0.000000  0.000000  -0.000000)
(-0.000000  0.000000  0.000000)
(-0.000000  0.000000  -0.000000)
(-0.000000  0.000000  0.000000)
(-0.000000  0.000000  -0.000000)
(-0.000000  0.000000  0.000000)
(-0.000000  0.000000  -0.000000)
(-0.000000  0.000000  -0.000000)
(-0.000000  0.000000  0.000000)
(-0.000000  0.000000  0.000000)
(-0.000000  0.000000  -0.000000)
(-0.000000  0.000000  -0.000000)
(-0.000000  0.000000  -0.000000)
(-0.000000  0.000000  0.000000)
(-0.000000  0.000000  -0.000000)
(-0.000000  0.000000  -0.000000)
(-0.000000  0.000000  -0.000000)
(-0.000000  0.000000  0.000000)
(-0.000000  0.000000  -0.000000)
(-0.000000  0.000000  0.000000)
(-0.000000  0.000000  -0.000000)
(0.000000  0.000000  0.000000)
(0.000000  0.000000  -0.000000)
(0.000000  0.000000  -0.000000)
(-0.000000  0.000000  -0.000000)
(0.000000  0.000000  0.000000)
(0.000000  0.000000  -0.000000)
(0.000000  0.000000  0.000000)
(0.000000  0.000000  -0.000000)
(0.000000  0.000000  0.000000)
(0.000000  0.000000  -0.000000)
(0.000000  0.000000  -0.000000)
(0.000000  0.000000  -0.000000)
(0.000000  0.000000  -0.000000)
(0.000000  0.000000  -0.000000)
(0.000000  0.000000  -0.000000)
(0.000000  0.000000  -0.000000)
(0.000000  0.000000  -0.000000)
(0.000000  0.000000  -0.000000)
(0.000000  0.000000  -0.000000)
(0.000000  0.000000  -0.000000)
(0.000000  0.000000  -0.000000)
(0.000000  0.000000  -0.000000)
(0.000000  0.000000  -0.000000)
(0.000000  0.000000  -0.000000)
(0.000000  0.000000  -0.000000)
(0.000000  0.000000  -0.000000)
(0.000000  0.000000  -0.000000)
(0.000000  0.000000  -0.000000)
(0.000000  0.000000  -0.000000)
(0.000000  0.000000  -0.000000)
(0.000000  0.000000  -0.000000)
(0.000000  0.000000  -0.000000)
(0.000000  0.000000  -0.000000)
(0.000000  0.000000  -0.000000)
(0.000000  0.000000  -0.000000)
(0.000000  0.000000  -0.000000)
(0.000000  0.000000  -0.000000)
(0.000000  0.000000  -0.000000)
(0.000000  0.000000  -0.000000)
(0.000000  0.000000  -0.000000)
(0.000000  0.000000  -0.000000)
(0.000000  0.000000  -0.000000)
(0.000000  0.000000  -0.000000)
(0.000000  0.000000  -0.000000)
(0.000000  0.000000  -0.000000)
(0.000000  0.000000  -0.000000)
(0.000000  0.000000  -0.000000)
(0.000000  0.000000  -0.000000)
(0.000000  0.000000  -0.000000)
(0.000000  0.000000  -0.000000)
(0.000000  0.000000  -0.000000)
(0.000000  0.000000  -0.000000)
(0.000000  0.000000  -0.000000)
(0.000000  0.000000  -0.000000)
(0.000000  0.000000  -0.000000)
(0.000000  0.000000  -0.000000)
(0.000000  0.000000  -0.000000)
(0.000000  0.000000  -0.000000)
(0.000000  0.000000  -0.000000)
(0.000000  0.000000  -0.000000)
(0.000000  0.000000  -0.000000)
(0.000000  0.000000  -0.000000)
(0.000000  0.000000  -0.000000)
(0.000000  0.000000  -0.000000)
(0.000000  0.000000  -0.000000)
(0.000000  0.000000  -0.000000)
(0.000000  0.000000  -0.000000)
(0.000000  0.000000  -0.000000)
(0.000000  0.000000  -0.000000)
(0.000000  0.000000  -0.000000)
(0.000000  0.000000  -0.000000)
(0.000000  0.000000  -0.000000)
(0.000000  0.000000  -0.000000)
(0.000000  0.000000  -0.000000)
(0.000000  0.000000  -0.000000)
(0.000000  0.000000  -0.000000)
(0.000000  0.000000  -0.000000)
(0.000000  0.000000  -0.000000)
(0.000000  0.000000  -0.000000)
(0.000000  0.000000  -0.000000)
(0.000000  0.000000  -0.000000)
(0.000000  0.000000  -0.000000)
(0.000000  0.000000  -0.000000)
(0.000000  0.000000  -0.000000)
(0.000000  0.000000  -0.000000)
(0.000000  0.000000  -0.000000)
(0.000000  0.000000  -0.000000)
(0.000000  0.000000  -0.000000)
(0.000000  0.000000  -0.000000)
(0.000000  0.000000  -0.000000)
(0.000000  0.000000  -0.000000)
(0.000000  0.000000  -0.000000)
(0.000000  0.000000  -0.000000)
(0.000000  0.000000  -0.000000)
(0.000000  0.000000  -0.000000)
(0.000000  0.000000  -0.000000)
(0.000000  0.000000  -0.000000)
(0.000000  0.000000  -0.000000)
(0.000000  0.000000  -0.000000)
(0.000000  0.000000  -0.000000)
(0.000000  0.000000  -0.000000)
(0.000000  0.000000  -0.000000)
(0.000000  0.000000  -0.000000)
(0.000000  0.000000  -0.000000)
(0.000000  0.000000  -0.000000)
(0.000000  0.000000  -0.000000)
(0.000000  0.000000  -0.000000)
(0.000000  0.000000  -0.000000)
(0.000000  0.000000  -0.000000)
(0.000000  0.000000  -0.000000)
(0.000000  0.000000  -0.000000)
(0.000000  0.000000  -0.000000)
(0.000000  0.000000  -0.000000)
(0.000000  0.000000  -0.000000)
(0.000000  0.000000  -0.000000)
(0.000000  0.000000  -0.000000)
(0.000000  0.000000  -0.000000)
(0.000000  0.000000  -0.000000)
(0.000000  0.000000  -0.000000)
(0.000000  0.000000  -0.000000)
(0.000000  0.000000  -0.000000)
(0.000000  0.000000  -0.000000)
(0.000000  0.000000  -0.000000)
(0.000000  0.000000  -0.000000)
(0.000000  0.000000  -0.000000)
(0.000000  0.000000  -0.000000)
(0.000000  0.000000  -0.000000)
(0.000000  0.000000  -0.000000)
(0.000000  0.000000  -0.000000)
(0.000000  0.000000  -0.000000)
(0.000000  0.000000  -0.000000)
(0.000000  0.000000  -0.000000)
(0.000000  0.000000  -0.000000)
(0.000000  0.000000  -0.000000)
(0.000000  0.000000  -0.000000)
(0.000000  0.000000  -0.000000)
(0.000000  0.000000  -0.000000)
(0.000000  0.000000  -0.000000)
(0.000000  0.000000  -0.000000)
(0.000000  0.000000  -0.000000)
(0.000000  0.000000  -0.000000)
(0.000000  0.000000  -0.000000)
(0.000000  0.000000  -0.000000)
(0.000000  0.000000  -0.000000)
(0.000000  0.000000  -0.000000)
(0.000000  0.000000  -0.000000)
(0.000000  0.000000  -0.000000)
(0.000000  0.000000  -0.000000)
(0.000000  0.000000  -0.000000)
(0.000000  0.000000  -0.000000)
(0.000000  0.000000  -0.000000)
(0.000000  0.000000  -0.000000)
(0.000000  0.000000  -0.000000)
(0.000000  0.000000  -0.000000)
(0.000000  0.000000  -0.000000)
(0.000000  0.000000  -0.000000)
(0.000000  0.000000  -0.000000)
(0.000000  0.000000  -0.000000)
(0.000000  0.000000  -0.000000)
(0.000000  0.000000  -0.000000)
(0.000000  0.000000  -0.000000)
(0.000000  0.000000  -0.000000)
(0.000000  0.000000  -0.000000)
(0.000000  0.000000  -0.000000)
(0.000000  0.000000  -0.000000)
(0.000000  0.000000  -0.000000)
(0.000000  0.000000  -0.000000)
(0.000000  0.000000  -0.000000)
(0.000000  0.000000  -0.000000)
(0.000000  0.000000  -0.000000)
(0.000000  0.000000  -0.000000)
(0.000000  0.000000  -0.000000)
(0.000000  0.000000  -0.000000)
(0.000000  0.000000  -0.000000)
(0.000000  0.000000  -0.000000)
(0.000000  0.000000  -0.000000)
(0.000000  0.000000  -0.000000)
(0.000000  0.000000  -0.000000)
(0.000000  0.000000  -0.000000)
(0.000000  0.000000  -0.000000)
(0.000000  0.000000  -0.000000)
(0.000000  0.000000  -0.000000)
(0.000000  0.000000  -0.000000)
(0.000000  0.000000  -0.000000)
(0.000000  0.000000  -0.000000)
(0.000000  0.000000  -0.000000)
(0.000000  0.000000  -0.000000)
(0.000000  0.000000  -0.000000)
(0.000000  0.000000  -0.000000)
(0.000000  0.000000  -0.000000)
(0.000000  0.000000  -0.000000)
(0.000000  0.000000  -0.000000)
(0.000000  0.000000  -0.000000)
(0.000000  0.000000  -0.000000)
(0.000000  0.000000  -0.000000)
(0.000000  0.000000  -0.000000)
(0.000000  0.000000  -0.000000)
(0.000000  0.000000  -0.000000)
(0.000000  0.000000  -0.000000)
(0.000000  0.000000  -0.000000)
(0.000000  0.000000  -0.000000)
(0.000000  0.000000  -0.000000)
(0.000000  0.000000  -0.000000)
(0.000000  0.000000  -0.000000)
(0.000000  0.000000  -0.000000)
(0.000000  0.000000  -0.000000)
(0.000000  0.000000  -0.000000)
(0.000000  0.000000  -0.000000)
(0.000000  0.000000  -0.000000)
(0.000000  0.000000  -0.000000)
(0.000000  0.000000  -0.000000)
(0.000000  0.000000  -0.000000)
(0.000000  0.000000  -0.000000)
(0.000000  0.000000  -0.000000)
(0.000000  0.000000  -0.000000)
(0.000000  0.000000  -0.000000)
(0.000000  0.000000  -0.000000)
(0.000000  0.000000  -0.000000)
(0.000000  0.000000  -0.000000)
(0.000000  0.000000  -0.000000)
(0.000000  0.000000  -0.000000)
(0.000000  0.000000  -0.000000)
(0.000000  0.000000  -0.000000)
(0.000000  0.000000  -0.000000)
(0.000000  0.000000  -0.000000)
(0.000000  0.000000  -0.000000)
(0.000000  0.000000  -0.000000)
(0.000000  0.000000  -0.000000)
(0.000000  0.000000  -0.000000)
(0.000000  0.000000  -0.000000)
(0.000000  0.000000  -0.000000)
(0.000000  0.000000  -0.000000)
(0.000000  0.000000  -0.000000)
(0.000000  0.000000  -0.000000)
(0.000000  0.000000  -0.000000)
(0.000000  0.000000  -0.000000)
(0.000000  0.000000  -0.000000)
(0.000000  0.000000  -0.000000)
(0.000000  0.000000  -0.000000)
(0.000000  0.000000  -0.000000)
(0.000000  0.000000  -0.000000)
(0.000000  0.000000  -0.000000)
(0.000000  0.000000  -0.000000)
(0.000000  0.000000  -0.000000)
(0.000000  0.000000  -0.000000)
(0.000000  0.000000  -0.000000)
(0.000000  0.000000  -0.000000)
(0.000000  0.000000  -0.000000)
(0.000000  0.000000  -0.000000)
(0.000000  0.000000  -0.000000)
(0.000000  0.000000  -0.000000)
(0.000000  0.000000  -0.000000)
(0.000000  0.000000  -0.000000)
(0.000000  0.000000  -0.000000)
(0.000000  0.000000  -0.000000)
(0.000000  0.000000  -0.000000)
(0.000000  0.000000  -0.000000)
(0.000000  0.000000  -0.000000)
(0.000000  0.000000  -0.000000)
(0.000000  0.000000  -0.000000)
(0.000000  0.000000  -0.000000)
(0.000000  0.000000  -0.000000)
(0.000000  0.000000  -0.000000)
(0.000000  0.000000  -0.000000)
(0.000000  0.000000  -0.000000)
(0.000000  0.000000  -0.000000)
(0.000000  0.000000  -0.000000)
(0.000000  0.000000  -0.000000)
(0.000000  0.000000  -0.000000)
(0.000000  0.000000  -0.000000)
(0.000000  0.000000  -0.000000)
(0.000000  0.000000  -0.000000)
(0.000000  0.000000  -0.000000)
(0.000000  0.000000  -0.000000)
(0.000000  0.000000  -0.000000)
(0.000000  0.000000  -0.000000)
(0.000000  0.000000  -0.000000)
(0.000000  0.000000  -0.000000)
(0.000000  0.000000  -0.000000)
(0.000000  0.000000  -0.000000)
(0.000000  0.000000  -0.000000)
(0.000000  0.000000  -0.000000)
(0.000000  0.000000  -0.000000)
(0.000000  0.000000  -0.000000)
(0.000000  0.000000  -0.000000)
(0.000000  0.000000  -0.000000)
(0.000000  0.000000  -0.000000)
(0.000000  0.000000  -0.000000)
(0.000000  0.000000  -0.000000)
(0.000000  0.000000  -0.000000)
(0.000000  0.000000  -0.000000)
(0.000000  0.000000  -0.000000)
(0.000000  0.000000  -0.000000)
(0.000000  0.000000  -0.000000)
(0.000000  0.000000  -0.000000)
(0.000000  0.000000  -0.000000)
(0.000000  0.000000  -0.000000)
(0.000000  0.000000  -0.000000)
(0.000000  0.000000  -0.000000)
(0.000000  0.000000  -0.000000)
(0.000000  0.000000  -0.000000)
(0.000000  0.000000  -0.000000)
(0.000000  0.000000  -0.000000)
(0.000000  0.000000  -0.000000)
(0.000001  0.000000  -0.000000)
(0.000001  0.000000  -0.000000)
(0.000001  0.000000  -0.000000)
(0.000001  0.000000  -0.000000)
(0.000001  0.000000  -0.000000)
(0.000001  0.000000  -0.000000)
(0.000001  0.000000  -0.000000)
(0.000001  0.000000  -0.000000)
(0.000001  0.000000  -0.000000)
(0.000001  0.000000  -0.000000)
(0.000001  0.000000  -0.000000)
(0.000001  0.000000  -0.000000)
(0.000001  0.000000  -0.000000)
(0.000001  0.000000  -0.000000)
(0.000002  0.000000  -0.000000)
(0.000002  0.000000  -0.000000)
(0.000002  0.000000  -0.000000)
(0.000002  0.000000  -0.000000)
(0.000002  0.000000  -0.000000)
(0.000002  0.000000  -0.000000)
(0.000003  0.000000  -0.000000)
(0.000003  0.000000  -0.000000)
(0.000003  0.000000  -0.000000)
(0.000003  0.000000  -0.000000)
(0.000004  0.000000  -0.000001)
(0.000004  0.000000  -0.000001)
(0.000004  0.000000  -0.000001)
(0.000005  0.000000  -0.000001)
(0.000005  0.000000  -0.000001)
(0.000005  0.000000  -0.000001)
(0.000006  0.000000  -0.000001)
(0.000006  0.000000  -0.000001)
(0.000007  0.000000  -0.000001)
(0.000008  0.000000  -0.000001)
(0.000008  0.000000  -0.000001)
(0.000009  0.000000  -0.000001)
(0.000010  0.000000  -0.000001)
(0.000010  0.000000  -0.000001)
(0.000011  0.000000  -0.000002)
(0.000012  0.000000  -0.000002)
(0.000013  0.000000  -0.000002)
(0.000014  0.000000  -0.000002)
(0.000016  0.000000  -0.000002)
(0.000017  0.000000  -0.000002)
(0.000019  0.000000  -0.000003)
(0.000020  0.000000  -0.000003)
(0.000022  0.000000  -0.000003)
(0.000024  0.000000  -0.000003)
(0.000026  0.000000  -0.000004)
(0.000028  0.000000  -0.000004)
(0.000030  0.000000  -0.000004)
(0.000033  0.000000  -0.000005)
(0.000036  0.000000  -0.000005)
(0.000039  0.000000  -0.000005)
(0.000042  0.000000  -0.000006)
(0.000045  0.000000  -0.000006)
(0.000049  0.000000  -0.000007)
(0.000054  0.000000  -0.000007)
(0.000058  0.000000  -0.000008)
(0.000063  0.000000  -0.000009)
(0.000068  0.000000  -0.000009)
(0.000074  0.000000  -0.000010)
(0.000081  0.000000  -0.000011)
(0.000087  0.000000  -0.000012)
(0.000095  0.000000  -0.000013)
(0.000103  0.000000  -0.000014)
(0.000112  0.000000  -0.000015)
(0.000121  0.000000  -0.000017)
(0.000131  0.000000  -0.000018)
(0.000142  0.000000  -0.000020)
(0.000155  0.000000  -0.000021)
(0.000168  0.000000  -0.000023)
(0.000182  0.000000  -0.000025)
(0.000197  0.000000  -0.000027)
(0.000214  0.000000  -0.000029)
(0.000232  0.000000  -0.000032)
(0.000252  0.000000  -0.000035)
(0.000273  0.000000  -0.000038)
(0.000296  0.000000  -0.000041)
(0.000321  0.000000  -0.000044)
(0.000348  0.000000  -0.000048)
(0.000377  0.000000  -0.000052)
(0.000409  0.000000  -0.000056)
(0.000443  0.000000  -0.000061)
(0.000480  0.000000  -0.000066)
(0.000521  0.000000  -0.000071)
(0.000564  0.000000  -0.000077)
(0.000611  0.000000  -0.000083)
(0.000662  0.000000  -0.000090)
(0.000718  0.000000  -0.000097)
(0.000777  0.000000  -0.000105)
(0.000842  0.000000  -0.000114)
(0.000911  0.000000  -0.000123)
(0.000987  0.000000  -0.000133)
(0.001068  0.000000  -0.000143)
(0.001156  0.000000  -0.000155)
(0.001251  0.000000  -0.000167)
(0.001353  0.000000  -0.000180)
(0.001463  0.000000  -0.000194)
(0.001582  0.000000  -0.000209)
(0.001711  0.000000  -0.000225)
(0.001849  0.000000  -0.000243)
(0.001997  0.000000  -0.000261)
(0.002157  0.000000  -0.000281)
(0.002329  0.000000  -0.000302)
(0.002513  0.000000  -0.000324)
(0.002711  0.000000  -0.000347)
(0.002923  0.000000  -0.000372)
(0.003151  0.000000  -0.000399)
(0.003395  0.000000  -0.000427)
(0.003656  0.000000  -0.000457)
(0.003935  0.000000  -0.000488)
(0.004232  0.000000  -0.000520)
(0.004550  0.000000  -0.000555)
(0.004888  0.000000  -0.000591)
(0.005248  0.000000  -0.000628)
(0.005631  0.000000  -0.000667)
(0.006038  0.000000  -0.000707)
(0.006468  0.000000  -0.000749)
(0.006924  0.000000  -0.000792)
(0.007406  0.000000  -0.000836)
(0.007914  0.000000  -0.000881)
(0.008449  0.000000  -0.000927)
(0.009012  0.000000  -0.000973)
(0.009603  0.000000  -0.001020)
(0.010221  0.000000  -0.001067)
(0.010867  0.000000  -0.001113)
(0.011541  0.000000  -0.001159)
(0.012242  0.000000  -0.001204)
(0.012970  0.000000  -0.001248)
(0.013723  0.000000  -0.001290)
(0.014500  0.000000  -0.001329)
(0.015301  0.000000  -0.001366)
(0.016122  0.000000  -0.001399)
(0.016962  0.000000  -0.001429)
(0.017820  0.000000  -0.001454)
(0.018691  0.000000  -0.001475)
(0.019573  0.000000  -0.001490)
(0.020462  0.000000  -0.001500)
(0.021356  0.000000  -0.001503)
(0.022250  0.000000  -0.001500)
(0.023140  0.000000  -0.001489)
(0.024022  0.000000  -0.001471)
(0.024891  0.000000  -0.001446)
(0.025743  0.000000  -0.001412)
(0.026572  0.000000  -0.001370)
(0.027375  0.000000  -0.001321)
(0.028145  0.000000  -0.001263)
(0.028879  0.000000  -0.001197)
(0.029571  0.000000  -0.001123)
(0.030217  0.000000  -0.001042)
(0.030812  0.000000  -0.000953)
(0.031352  0.000000  -0.000858)
(0.031834  0.000000  -0.000757)
(0.032254  0.000000  -0.000650)
(0.032609  0.000000  -0.000539)
(0.032896  0.000000  -0.000423)
(0.033114  0.000000  -0.000305)
(0.033259  0.000000  -0.000184)
(0.033332  0.000000  -0.000061)
(0.033332  0.000000  0.000061)
(0.033259  0.000000  0.000184)
(0.033114  0.000000  0.000305)
(0.032896  0.000000  0.000423)
(0.032609  0.000000  0.000539)
(0.032254  0.000000  0.000650)
(0.031834  0.000000  0.000757)
(0.031352  0.000000  0.000858)
(0.030812  0.000000  0.000953)
(0.030217  0.000000  0.001042)
(0.029571  0.000000  0.001123)
(0.028879  0.000000  0.001197)
(0.028145  0.000000  0.001263)
(0.027375  0.000000  0.001321)
(0.026572  0.000000  0.001370)
(0.025743  0.000000  0.001412)
(0.024891  0.000000  0.001446)
(0.024022  0.000000  0.001471)
(0.023140  0.000000  0.001489)
(0.022250  0.000000  0.001500)
(0.021356  0.000000  0.001503)
(0.020462  0.000000  0.001500)
(0.019573  0.000000  0.001490)
(0.018691  0.000000  0.001475)
(0.017820  0.000000  0.001454)
(0.016962  0.000000  0.001429)
(0.016122  0.000000  0.001399)
(0.015301  0.000000  0.001366)
(0.014500  0.000000  0.001329)
(0.013723  0.000000  0.001290)
(0.012970  0.000000  0.001248)
(0.012242  0.000000  0.001204)
(0.011541  0.000000  0.001159)
(0.010867  0.000000  0.001113)
(0.010221  0.000000  0.001067)
(0.009603  0.000000  0.001020)
(0.009012  0.000000  0.000973)
(0.008449  0.000000  0.000927)
(0.007914  0.000000  0.000881)
(0.007406  0.000000  0.000836)
(0.006924  0.000000  0.000792)
(0.006468  0.000000  0.000749)
(0.006038  0.000000  0.000707)
(0.005631  0.000000  0.000667)
(0.005248  0.000000  0.000628)
(0.004888  0.000000  0.000591)
(0.004550  0.000000  0.000555)
(0.004232  0.000000  0.000520)
(0.003935  0.000000  0.000488)
(0.003656  0.000000  0.000457)
(0.003395  0.000000  0.000427)
(0.003151  0.000000  0.000399)
(0.002923  0.000000  0.000372)
(0.002711  0.000000  0.000347)
(0.002513  0.000000  0.000324)
(0.002329  0.000000  0.000302)
(0.002157  0.000000  0.000281)
(0.001997  0.000000  0.000261)
(0.001849  0.000000  0.000243)
(0.001711  0.000000  0.000225)
(0.001582  0.000000  0.000209)
(0.001463  0.000000  0.000194)
(0.001353  0.000000  0.000180)
(0.001251  0.000000  0.000167)
(0.001156  0.000000  0.000155)
(0.001068  0.000000  0.000143)
(0.000987  0.000000  0.000133)
(0.000911  0.000000  0.000123)
(0.000842  0.000000  0.000114)
(0.000777  0.000000  0.000105)
(0.000718  0.000000  0.000097)
(0.000662  0.000000  0.000090)
(0.000611  0.000000  0.000083)
(0.000564  0.000000  0.000077)
(0.000521  0.000000  0.000071)
(0.000480  0.000000  0.000066)
(0.000443  0.000000  0.000061)
(0.000409  0.000000  0.000056)
(0.000377  0.000000  0.000052)
(0.000348  0.000000  0.000048)
(0.000321  0.000000  0.000044)
(0.000296  0.000000  0.000041)
(0.000273  0.000000  0.000038)
(0.000252  0.000000  0.000035)
(0.000232  0.000000  0.000032)
(0.000214  0.000000  0.000029)
(0.000197  0.000000  0.000027)
(0.000182  0.000000  0.000025)
(0.000168  0.000000  0.000023)
(0.000155  0.000000  0.000021)
(0.000142  0.000000  0.000020)
(0.000131  0.000000  0.000018)
(0.000121  0.000000  0.000017)
(0.000112  0.000000  0.000015)
(0.000103  0.000000  0.000014)
(0.000095  0.000000  0.000013)
(0.000087  0.000000  0.000012)
(0.000081  0.000000  0.000011)
(0.000074  0.000000  0.000010)
(0.000068  0.000000  0.000009)
(0.000063  0.000000  0.000009)
(0.000058  0.000000  0.000008)
(0.000054  0.000000  0.000007)
(0.000049  0.000000  0.000007)
(0.000045  0.000000  0.000006)
(0.000042  0.000000  0.000006)
(0.000039  0.000000  0.000005)
(0.000036  0.000000  0.000005)
(0.000033  0.000000  0.000005)
(0.000030  0.000000  0.000004)
(0.000028  0.000000  0.000004)
(0.000026  0.000000  0.000004)
(0.000024  0.000000  0.000003)
(0.000022  0.000000  0.000003)
(0.000020  0.000000  0.000003)
(0.000019  0.000000  0.000003)
(0.000017  0.000000  0.000002)
(0.000016  0.000000  0.000002)
(0.000014  0.000000  0.000002)
(0.000013  0.000000  0.000002)
(0.000012  0.000000  0.000002)
(0.000011  0.000000  0.000002)
(0.000010  0.000000  0.000001)
(0.000010  0.000000  0.000001)
(0.000009  0.000000  0.000001)
(-0.000000  0.000000  0.000000)
(-0.000000  0.000000  -0.000000)
(-0.000000  0.000000  0.000000)
(-0.000000  0.000000  -0.000000)
(-0.000000  0.000000  0.000000)
(-0.000000  0.000000  -0.000000)
(-0.000000  0.000000  0.000000)
(-0.000000  0.000000  -0.000000)
(-0.000000  0.000000  -0.000000)
(-0.000000  0.000000  0.000000)
(-0.000000  0.000000  -0.000000)
(-0.000000  0.000000  -0.000000)
(-0.000000  0.000000  0.000000)
(-0.000000  0.000000  -0.000000)
(-0.000000  0.000000  -0.000000)
(-0.000000  0.000000  0.000000)
(-0.000000  0.000000  -0.000000)
(-0.000000  0.000000  0.000000)
(-0.000000  0.000000  -0.000000)
(-0.000000  0.000000  -0.000000)
(-0.000000  0.000000  0.000000)
(-0.000000  0.000000  -0.000000)
(-0.000000  0.000000  -0.000000)
(-0.000000  0.000000  -0.000000)
(-0.000000  0.000000  0.000000)
(-0.000000  0.000000  -0.000000)
(-0.000000  0.000000  0.000000)
(-0.000000  0.000000  0.000000)
(-0.000000  0.000000  -0.000000)
(-0.000000  0.000000  -0.000000)
(-0.000000  0.000000  0.000000)
(-0.000000  0.000000  0.000000)
(-0.000000  0.000000  0.000000)
(-0.000000  0.000000  -0.000000)
(-0.000000  0.000000  -0.000000)
(-0.000000  0.000000  -0.000000)
(-0.000000  0.000000  -0.000000)
(-0.000000  0.000000  0.000000)
(-0.000000  0.000000  -0.000000)
(-0.000000  0.000000  0.000000)
(-0.000000  0.000000  -0.000000)
(-0.000000  0.000000  0.000000)
(-0.000000  0.000000  -0.000000)
(-0.000000  0.000000  0.000000)
(-0.000000  0.000000  0.000000)
(-0.000000  0.000000  -0.000000)
(-0.000000  0.000000  0.000000)
(-0.000000  0.000000  -0.000000)
(-0.000000  0.000000  -0.000000)
(-0.000000  0.000000  0.000000)
(-0.000000  0.000000  -0.000000)
(-0.000000  0.000000  0.000000)
(-0.000000  0.000000  0.000000)
(-0.000000  0.000000  -0.000000)
(-0.000000  0.000000  -0.000000)
(-0.000000  0.000000  0.000000)
(-0.000000  0.000000  -0.000000)
(-0.000000  0.000000  0.000000)
(-0.000000  0.000000  -0.000000)
(-0.000000  0.000000  0.000000)
(-0.000000  0.000000  0.000000)
(-0.000000  0.000000  -0.000000)
(-0.000000  0.000000  0.000000)
(-0.000000  0.000000  0.000000)
(-0.000000  0.000000  -0.000000)
(-0.000000  0.000000  0.000000)
(-0.000000  0.000000  -0.000000)
(-0.000000  0.000000  -0.000000)
(-0.000000  0.000000  -0.000000)
(-0.000000  0.000000  0.000000)
(-0.000000  0.000000  -0.000000)
(-0.000000  0.000000  -0.000000)
(-0.000000  0.000000  0.000000)
(-0.000000  0.000000  -0.000000)
(-0.000000  0.000000  -0.000000)
(-0.000000  0.000000  0.000000)
(-0.000000  0.000000  0.000000)
(-0.000000  0.000000  -0.000000)
(-0.000000  0.000000  0.000000)
(-0.000000  0.000000  -0.000000)
(-0.000000  0.000000  0.000000)
(-0.000000  0.000000  -0.000000)
(-0.000000  0.000000  0.000000)
(-0.000000  0.000000  0.000000)
(-0.000000  0.000000  0.000000)
(-0.000000  0.000000  -0.000000)
(-0.000000  0.000000  -0.000000)
(-0.000000  0.000000  0.000000)
(-0.000000  0.000000  0.000000)
(-0.000000  0.000000  0.000000)
(-0.000000  0.000000  -0.000000)
(-0.000000  0.000000  0.000000)
(-0.000000  0.000000  0.000000)
(-0.000000  0.000000  0.000000)
(0.000000  0.000000  -0.000000)
(-0.000000  0.000000  0.000000)
(-0.000000  0.000000  -0.000000)
(-0.000000  0.000000  0.000000)
(-0.000000  0.000000  0.000000)
(0.000000  0.000000  0.000000)
(0.000000  0.000000  0.000000)
(-0.000000  0.000000  -0.000000)
(0.000000  0.000000  -0.000000)
(0.000000  0.000000  0.000000)
(-0.000000  0.000000  0.000000)
(0.000000  0.000000  -0.000000)
(0.000000  0.000000  -0.000000)
(0.000000  0.000000  -0.000000)
(0.000000  0.000000  -0.000000)
(0.000000  0.000000  0.000000)
(0.000000  0.000000  -0.000000)
(0.000000  0.000000  -0.000000)
(0.000000  0.000000  0.000000)
(0.000000  0.000000  0.000000)
(0.000000  0.000000  -0.000000)
(0.000000  0.000000  0.000000)
(0.000000  0.000000  0.000000)
(0.000000  0.000000  0.000000)
(0.000000  0.000000  -0.000000)
(0.000000  0.000000  -0.000000)
(0.000000  0.000000  0.000000)
(0.000000  0.000000  -0.000000)
(0.000000  0.000000  0.000000)
(0.000000  0.000000  -0.000000)
(0.000000  0.000000  0.000000)
(0.000000  0.000000  -0.000000)
(0.000000  0.000000  0.000000)
(0.000000  0.000000  -0.000000)
(0.000000  0.000000  0.000000)
(-0.000000  0.000000  -0.000000)
(0.000000  0.000000  0.000000)
(0.000000  0.000000  -0.000000)
(0.000000  0.000000  -0.000000)
(0.000000  0.000000  0.000000)
(0.000000  0.000000  -0.000000)
(0.000000  0.000000  0.000000)
(-0.000000  0.000000  -0.000000)
(0.000000  0.000000  0.000000)
(0.000000  0.000000  -0.000000)
(0.000000  0.000000  0.000000)
(0.000000  0.000000  0.000000)
(0.000000  0.000000  -0.000000)
(0.000000  0.000000  0.000000)
(0.000000  0.000000  0.000000)
(0.000000  0.000000  0.000000)
(0.000000  0.000000  -0.000000)
(-0.000000  0.000000  0.000000)
(-0.000000  0.000000  -0.000000)
(-0.000000  0.000000  -0.000000)
(-0.000000  0.000000  0.000000)
(0.000000  0.000000  -0.000000)
(-0.000000  0.000000  0.000000)
(-0.000000  0.000000  -0.000000)
(-0.000000  0.000000  0.000000)
(-0.000000  0.000000  -0.000000)
(-0.000000  0.000000  0.000000)
(-0.000000  0.000000  -0.000000)
(-0.000000  0.000000  0.000000)
(-0.000000  0.000000  -0.000000)
(-0.000000  0.000000  0.000000)
(-0.000000  0.000000  -0.000000)
(-0.000000  0.000000  -0.000000)
(-0.000000  0.000000  -0.000000)
(-0.000000  0.000000  0.000000)
(-0.000000  0.000000  -0.000000)
(-0.000000  0.000000  -0.000000)
(-0.000000  0.000000  0.000000)
(-0.000000  0.000000  -0.000000)
(-0.000000  0.000000  -0.000000)
(-0.000000  0.000000  0.000000)
(-0.000000  0.000000  -0.000000)
(-0.000000  0.000000  0.000000)
(-0.000000  0.000000  -0.000000)
(-0.000000  0.000000  0.000000)
(-0.000000  0.000000  -0.000000)
(-0.000000  0.000000  -0.000000)
(-0.000000  0.000000  -0.000000)
(-0.000000  0.000000  -0.000000)
(-0.000000  0.000000  -0.000000)
(-0.000000  0.000000  0.000000)
(-0.000000  0.000000  -0.000000)
(-0.000000  0.000000  -0.000000)
(-0.000000  0.000000  -0.000000)
(-0.000000  0.000000  -0.000000)
(-0.000000  0.000000  -0.000000)
(-0.000000  0.000000  -0.000000)
(-0.000000  0.000000  -0.000000)
(-0.000000  0.000000  -0.000000)
(-0.000000  0.000000  -0.000000)
(-0.000000  0.000000  -0.000000)
(-0.000000  0.000000  -0.000000)
(-0.000000  0.000000  -0.000000)
(0.000000  0.000000  -0.000000)
(0.000000  0.000000  -0.000000)
(0.000000  0.000000  -0.000000)
(0.000000  0.000000  -0.000000)
(0.000000  0.000000  -0.000000)
(0.000000  0.000000  -0.000000)
(0.000000  0.000000  -0.000000)
(0.000000  0.000000  -0.000000)
(0.000000  0.000000  -0.000000)
(0.000000  0.000000  -0.000000)
(0.000000  0.000000  -0.000000)
(0.000000  0.000000  -0.000000)
(0.000000  0.000000  -0.000000)
(0.000000  0.000000  -0.000000)
(0.000000  0.000000  -0.000000)
(0.000000  0.000000  -0.000000)
(0.000000  0.000000  -0.000000)
(0.000000  0.000000  -0.000000)
(0.000000  0.000000  -0.000000)
(0.000000  0.000000  -0.000000)
(0.000000  0.000000  -0.000000)
(0.000000  0.000000  -0.000000)
(0.000000  0.000000  -0.000000)
(0.000000  0.000000  -0.000000)
(0.000000  0.000000  -0.000000)
(0.000000  0.000000  -0.000000)
(0.000000  0.000000  -0.000000)
(0.000000  0.000000  -0.000000)
(0.000000  0.000000  -0.000000)
(0.000000  0.000000  -0.000000)
(0.000000  0.000000  -0.000000)
(0.000000  0.000000  -0.000000)
(0.000000  0.000000  -0.000000)
(0.000000  0.000000  -0.000000)
(0.000000  0.000000  -0.000000)
(0.000000  0.000000  -0.000000)
(0.000000  0.000000  -0.000000)
(0.000000  0.000000  -0.000000)
(0.000000  0.000000  -0.000000)
(0.000000  0.000000  -0.000000)
(0.000000  0.000000  -0.000000)
(0.000000  0.000000  -0.000000)
(0.000000  0.000000  -0.000000)
(0.000000  0.000000  -0.000000)
(0.000000  0.000000  -0.000000)
(0.000000  0.000000  -0.000000)
(0.000000  0.000000  -0.000000)
(0.000000  0.000000  -0.000000)
(0.000000  0.000000  -0.000000)
(0.000000  0.000000  -0.000000)
(0.000000  0.000000  -0.000000)
(0.000000  0.000000  -0.000000)
(0.000000  0.000000  -0.000000)
(0.000000  0.000000  -0.000000)
(0.000000  0.000000  -0.000000)
(0.000000  0.000000  -0.000000)
(0.000000  0.000000  -0.000000)
(0.000000  0.000000  -0.000000)
(0.000000  0.000000  -0.000000)
(0.000000  0.000000  -0.000000)
(0.000000  0.000000  -0.000000)
(0.000000  0.000000  -0.000000)
(0.000000  0.000000  -0.000000)
(0.000000  0.000000  -0.000000)
(0.000000  0.000000  -0.000000)
(0.000000  0.000000  -0.000000)
(0.000000  0.000000  -0.000000)
(0.000000  0.000000  -0.000000)
(0.000000  0.000000  -0.000000)
(0.000000  0.000000  -0.000000)
(0.000000  0.000000  -0.000000)
(0.000000  0.000000  -0.000000)
(0.000000  0.000000  -0.000000)
(0.000000  0.000000  -0.000000)
(0.000000  0.000000  -0.000000)
(0.000000  0.000000  -0.000000)
(0.000000  0.000000  -0.000000)
(0.000000  0.000000  -0.000000)
(0.000000  0.000000  -0.000000)
(0.000000  0.000000  -0.000000)
(0.000000  0.000000  -0.000000)
(0.000000  0.000000  -0.000000)
(0.000000  0.000000  -0.000000)
(0.000000  0.000000  -0.000000)
(0.000000  0.000000  -0.000000)
(0.000000  0.000000  -0.000000)
(0.000000  0.000000  -0.000000)
(0.000000  0.000000  -0.000000)
(0.000000  0.000000  -0.000000)
(0.000000  0.000000  -0.000000)
(0.000000  0.000000  -0.000000)
(0.000000  0.000000  -0.000000)
(0.000000  0.000000  -0.000000)
(0.000000  0.000000  -0.000000)
(0.000000  0.000000  -0.000000)
(0.000000  0.000000  -0.000000)
(0.000000  0.000000  -0.000000)
(0.000000  0.000000  -0.000000)
(0.000000  0.000000  -0.000000)
(0.000000  0.000000  -0.000000)
(0.000000  0.000000  -0.000000)
(0.000000  0.000000  -0.000000)
(0.000000  0.000000  -0.000000)
(0.000000  0.000000  -0.000000)
(0.000000  0.000000  -0.000000)
(0.000000  0.000000  -0.000000)
(0.000000  0.000000  -0.000000)
(0.000000  0.000000  -0.000000)
(0.000000  0.000000  -0.000000)
(0.000000  0.000000  -0.000000)
(0.000000  0.000000  -0.000000)
(0.000000  0.000000  -0.000000)
(0.000000  0.000000  -0.000000)
(0.000000  0.000000  -0.000000)
(0.000000  0.000000  -0.000000)
(0.000000  0.000000  -0.000000)
(0.000000  0.000000  -0.000000)
(0.000000  0.000000  -0.000000)
(0.000000  0.000000  -0.000000)
(0.000000  0.000000  -0.000000)
(0.000000  0.000000  -0.000000)
(0.000000  0.000000  -0.000000)
(0.000000  0.000000  -0.000000)
(0.000000  0.000000  -0.000000)
(0.000000  0.000000  -0.000000)
(0.000000  0.000000  -0.000000)
(0.000000  0.000000  -0.000000)
(0.000000  0.000000  -0.000000)
(0.000000  0.000000  -0.000000)
(0.000000  0.000000  -0.000000)
(0.000000  0.000000  -0.000000)
(0.000000  0.000000  -0.000000)
(0.000000  0.000000  -0.000000)
(0.000000  0.000000  -0.000000)
(0.000000  0.000000  -0.000000)
(0.000000  0.000000  -0.000000)
(0.000000  0.000000  -0.000000)
(0.000000  0.000000  -0.000000)
(0.000000  0.000000  -0.000000)
(0.000000  0.000000  -0.000000)
(0.000000  0.000000  -0.000000)
(0.000000  0.000000  -0.000000)
(0.000000  0.000000  -0.000000)
(0.000000  0.000000  -0.000000)
(0.000000  0.000000  -0.000000)
(0.000000  0.000000  -0.000000)
(0.000000  0.000000  -0.000000)
(0.000000  0.000000  -0.000000)
(0.000000  0.000000  -0.000000)
(0.000000  0.000000  -0.000000)
(0.000000  0.000000  -0.000000)
(0.000000  0.000000  -0.000000)
(0.000000  0.000000  -0.000000)
(0.000000  0.000000  -0.000000)
(0.000000  0.000000  -0.000000)
(0.000000  0.000000  -0.000000)
(0.000000  0.000000  -0.000000)
(0.000000  0.000000  -0.000000)
(0.000000  0.000000  -0.000000)
(0.000000  0.000000  -0.000000)
(0.000000  0.000000  -0.000000)
(0.000000  0.000000  -0.000000)
(0.000000  0.000000  -0.000000)
(0.000000  0.000000  -0.000000)
(0.000000  0.000000  -0.000000)
(0.000000  0.000000  -0.000000)
(0.000000  0.000000  -0.000000)
(0.000000  0.000000  -0.000000)
(0.000000  0.000000  -0.000000)
(0.000000  0.000000  -0.000000)
(0.000000  0.000000  -0.000000)
(0.000000  0.000000  -0.000000)
(0.000000  0.000000  -0.000000)
(0.000000  0.000000  -0.000000)
(0.000000  0.000000  -0.000000)
(0.000000  0.000000  -0.000000)
(0.000000  0.000000  -0.000000)
(0.000000  0.000000  -0.000000)
(0.000000  0.000000  -0.000000)
(0.000000  0.000000  -0.000000)
(0.000000  0.000000  -0.000000)
(0.000000  0.000000  -0.000000)
(0.000000  0.000000  -0.000000)
(0.000000  0.000000  -0.000000)
(0.000000  0.000000  -0.000000)
(0.000000  0.000000  -0.000000)
(0.000000  0.000000  -0.000000)
(0.000000  0.000000  -0.000000)
(0.000000  0.000000  -0.000000)
(0.000000  0.000000  -0.000000)
(0.000000  0.000000  -0.000000)
(0.000000  0.000000  -0.000000)
(0.000000  0.000000  -0.000000)
(0.000000  0.000000  -0.000000)
(0.000000  0.000000  -0.000000)
(0.000000  0.000000  -0.000000)
(0.000000  0.000000  -0.000000)
(0.000000  0.000000  -0.000000)
(0.000000  0.000000  -0.000000)
(0.000000  0.000000  -0.000000)
(0.000000  0.000000  -0.000000)
(0.000000  0.000000  -0.000000)
(0.000000  0.000000  -0.000000)
(0.000000  0.000000  -0.000000)
(0.000000  0.000000  -0.000000)
(0.000000  0.000000  -0.000000)
(0.000000  0.000000  -0.000000)
(0.000000  0.000000  -0.000000)
(0.000000  0.000000  -0.000000)
(0.000000  0.000000  -0.000000)
(0.000000  0.000000  -0.000000)
(0.000000  0.000000  -0.000000)
(0.000000  0.000000  -0.000000)
(0.000000  0.000000  -0.000000)
(0.000000  0.000000  -0.000000)
(0.000000  0.000000  -0.000000)
(0.000000  0.000000  -0.000000)
(0.000000  0.000000  -0.000000)
(0.000000  0.000000  -0.000000)
(0.000000  0.000000  -0.000000)
(0.000000  0.000000  -0.000000)
(0.000000  0.000000  -0.000000)
(0.000000  0.000000  -0.000000)
(0.000000  0.000000  -0.000000)
(0.000000  0.000000  -0.000000)
(0.000000  0.000000  -0.000000)
(0.000000  0.000000  -0.000000)
(0.000000  0.000000  -0.000000)
(0.000000  0.000000  -0.000000)
(0.000000  0.000000  -0.000000)
(0.000000  0.000000  -0.000000)
(0.000000  0.000000  -0.000000)
(0.000000  0.000000  -0.000000)
(0.000000  0.000000  -0.000000)
(0.000000  0.000000  -0.000000)
(0.000000  0.000000  -0.000000)
(0.000000  0.000000  -0.000000)
(0.000000  0.000000  -0.000000)
(0.000000  0.000000  -0.000000)
(0.000000  0.000000  -0.000000)
(0.000000  0.000000  -0.000000)
(0.000000  0.000000  -0.000000)
(0.000000  0.000000  -0.000000)
(0.000000  0.000000  -0.000000)
(0.000000  0.000000  -0.000000)
(0.000000  0.000000  -0.000000)
(0.000000  0.000000  -0.000000)
(0.000000  0.000000  -0.000000)
(0.000000  0.000000  -0.000000)
(0.000000  0.000000  -0.000000)
(0.000000  0.000000  -0.000000)
(0.000000  0.000000  -0.000000)
(0.000000  0.000000  -0.000000)
(0.000000  0.000000  -0.000000)
(0.000000  0.000000  -0.000000)
(0.000000  0.000000  -0.000000)
(0.000000  0.000000  -0.000000)
(0.000000  0.000000  -0.000000)
(0.000000  0.000000  -0.000000)
(0.000000  0.000000  -0.000000)
(0.000000  0.000000  -0.000000)
(0.000000  0.000000  -0.000000)
(0.000000  0.000000  -0.000000)
(0.000000  0.000000  -0.000000)
(0.000000  0.000000  -0.000000)
(0.000000  0.000000  -0.000000)
(0.000000  0.000000  -0.000000)
(0.000000  0.000000  -0.000000)
(0.000000  0.000000  -0.000000)
(0.000000  0.000000  -0.000000)
(0.000000  0.000000  -0.000000)
(0.000000  0.000000  -0.000000)
(0.000000  0.000000  -0.000000)
(0.000001  0.000000  -0.000000)
(0.000001  0.000000  -0.000000)
(0.000001  0.000000  -0.000000)
(0.000001  0.000000  -0.000000)
(0.000001  0.000000  -0.000000)
(0.000001  0.000000  -0.000000)
(0.000001  0.000000  -0.000000)
(0.000001  0.000000  -0.000000)
(0.000001  0.000000  -0.000000)
(0.000001  0.000000  -0.000000)
(0.000001  0.000000  -0.000000)
(0.000001  0.000000  -0.000000)
(0.000001  0.000000  -0.000000)
(0.000001  0.000000  -0.000000)
(0.000002  0.000000  -0.000000)
(0.000002  0.000000  -0.000000)
(0.000002  0.000000  -0.000000)
(0.000002  0.000000  -0.000000)
(0.000002  0.000000  -0.000000)
(0.000002  0.000000  -0.000000)
(0.000003  0.000000  -0.000000)
(0.000003  0.000000  -0.000000)
(0.000003  0.000000  -0.000000)
(0.000003  0.000000  -0.000000)
(0.000004  0.000000  -0.000001)
(0.000004  0.000000  -0.000001)
(0.000004  0.000000  -0.000001)
(0.000005  0.000000  -0.000001)
(0.000005  0.000000  -0.000001)
(0.000005  0.000000  -0.000001)
(0.000006  0.000000  -0.000001)
(0.000006  0.000000  -0.000001)
(0.000007  0.000000  -0.000001)
(0.000008  0.000000  -0.000001)
(0.000008  0.000000  -0.000001)
(0.000009  0.000000  -0.000001)
(0.000010  0.000000  -0.000001)
(0.000010  0.000000  -0.000002)
(0.000011  0.000000  -0.000002)
(0.000012  0.000000  -0.000002)
(0.000013  0.000000  -0.000002)
(0.000014  0.000000  -0.000002)
(0.000016  0.000000  -0.000002)
(0.000017  0.000000  -0.000003)
(0.000018  0.000000  -0.000003)
(0.000020  0.000000  -0.000003)
(0.000022  0.000000  -0.000003)
(0.000024  0.000000  -0.000004)
(0.000026  0.000000  -0.000004)
(0.000028  0.000000  -0.000004)
(0.000030  0.000000  -0.000005)
(0.000033  0.000000  -0.000005)
(0.000036  0.000000  -0.000005)
(0.000039  0.000000  -0.000006)
(0.000042  0.000000  -0.000006)
(0.000045  0.000000  -0.000007)
(0.000049  0.000000  -0.000007)
(0.000053  0.000000  -0.000008)
(0.000058  0.000000  -0.000009)
(0.000063  0.000000  -0.000009)
(0.000068  0.000000  -0.000010)
(0.000074  0.000000  -0.000011)
(0.000080  0.000000  -0.000012)
(0.000087  0.000000  -0.000013)
(0.000095  0.000000  -0.000014)
(0.000103  0.000000  -0.000015)
(0.000111  0.000000  -0.000017)
(0.000121  0.000000  -0.000018)
(0.000131  0.000000  -0.000019)
(0.000142  0.000000  -0.000021)
(0.000154  0.000000  -0.000023)
(0.000167  0.000000  -0.000025)
(0.000182  0.000000  -0.000027)
(0.000197  0.000000  -0.000029)
(0.000214  0.000000  -0.000032)
(0.000232  0.000000  -0.000034)
(0.000251  0.000000  -0.000037)
(0.000272  0.000000  -0.000040)
(0.000295  0.000000  -0.000044)
(0.000320  0.000000  -0.000047)
(0.000347  0.000000  -0.000051)
(0.000377  0.000000  -0.000056)
(0.000408  0.000000  -0.000060)
(0.000443  0.000000  -0.000065)
(0.000480  0.000000  -0.000070)
(0.000520  0.000000  -0.000076)
(0.000563  0.000000  -0.000083)
(0.000610  0.000000  -0.000089)
(0.000661  0.000000  -0.000097)
(0.000717  0.000000  -0.000105)
(0.000776  0.000000  -0.000113)
(0.000841  0.000000  -0.000122)
(0.000910  0.000000  -0.000132)
(0.000985  0.000000  -0.000143)
(0.001067  0.000000  -0.000154)
(0.001154  0.000000  -0.000166)
(0.001249  0.000000  -0.000179)
(0.001351  0.000000  -0.000193)
(0.001462  0.000000  -0.000209)
(0.001580  0.000000  -0.000225)
(0.001708  0.000000  -0.000242)
(0.001846  0.000000  -0.000261)
(0.001995  0.000000  -0.000280)
(0.002154  0.000000  -0.000301)
(0.002326  0.000000  -0.000324)
(0.002510  0.000000  -0.000348)
(0.002708  0.000000  -0.000373)
(0.002920  0.000000  -0.000400)
(0.003148  0.000000  -0.000428)
(0.003391  0.000000  -0.000459)
(0.003652  0.000000  -0.000490)
(0.003930  0.000000  -0.000524)
(0.004228  0.000000  -0.000559)
(0.004545  0.000000  -0.000596)
(0.004884  0.000000  -0.000634)
(0.005244  0.000000  -0.000674)
(0.005626  0.000000  -0.000716)
(0.006032  0.000000  -0.000760)
(0.006463  0.000000  -0.000804)
(0.006918  0.000000  -0.000851)
(0.007400  0.000000  -0.000898)
(0.007908  0.000000  -0.000946)
(0.008443  0.000000  -0.000996)
(0.009006  0.000000  -0.001045)
(0.009597  0.000000  -0.001096)
(0.010215  0.000000  -0.001146)
(0.010861  0.000000  -0.001196)
(0.011535  0.000000  -0.001245)
(0.012237  0.000000  -0.001294)
(0.012964  0.000000  -0.001340)
(0.013718  0.000000  -0.001385)
(0.014495  0.000000  -0.001428)
(0.015296  0.000000  -0.001467)
(0.016118  0.000000  -0.001503)
(0.016959  0.000000  -0.001535)
(0.017817  0.000000  -0.001562)
(0.018688  0.000000  -0.001585)
(0.019571  0.000000  -0.001601)
(0.020462  0.000000  -0.001612)
(0.021356  0.000000  -0.001615)
(0.022251  0.000000  -0.001611)
(0.023142  0.000000  -0.001600)
(0.024025  0.000000  -0.001581)
(0.024895  0.000000  -0.001553)
(0.025748  0.000000  -0.001517)
(0.026578  0.000000  -0.001473)
(0.027382  0.000000  -0.001419)
(0.028153  0.000000  -0.001357)
(0.028888  0.000000  -0.001286)
(0.029581  0.000000  -0.001207)
(0.030228  0.000000  -0.001119)
(0.030824  0.000000  -0.001024)
(0.031365  0.000000  -0.000922)
(0.031848  0.000000  -0.000813)
(0.032268  0.000000  -0.000699)
(0.032624  0.000000  -0.000579)
(0.032911  0.000000  -0.000455)
(0.033129  0.000000  -0.000327)
(0.033275  0.000000  -0.000197)
(0.033348  0.000000  -0.000066)
(0.033348  0.000000  0.000066)
(0.033275  0.000000  0.000197)
(0.033129  0.000000  0.000327)
(0.032911  0.000000  0.000455)
(0.032624  0.000000  0.000579)
(0.032268  0.000000  0.000699)
(0.031848  0.000000  0.000813)
(0.031365  0.000000  0.000922)
(0.030824  0.000000  0.001024)
(0.030228  0.000000  0.001119)
(0.029581  0.000000  0.001207)
(0.028888  0.000000  0.001286)
(0.028153  0.000000  0.001357)
(0.027382  0.000000  0.001419)
(0.026578  0.000000  0.001473)
(0.025748  0.000000  0.001517)
(0.024895  0.000000  0.001553)
(0.024025  0.000000  0.001581)
(0.023142  0.000000  0.001600)
(0.022251  0.000000  0.001611)
(0.021356  0.000000  0.001615)
(0.020462  0.000000  0.001612)
(0.019571  0.000000  0.001601)
(0.018688  0.000000  0.001585)
(0.017817  0.000000  0.001562)
(0.016959  0.000000  0.001535)
(0.016118  0.000000  0.001503)
(0.015296  0.000000  0.001467)
(0.014495  0.000000  0.001428)
(0.013718  0.000000  0.001385)
(0.012964  0.000000  0.001340)
(0.012237  0.000000  0.001294)
(0.011535  0.000000  0.001245)
(0.010861  0.000000  0.001196)
(0.010215  0.000000  0.001146)
(0.009597  0.000000  0.001096)
(0.009006  0.000000  0.001045)
(0.008443  0.000000  0.000996)
(0.007908  0.000000  0.000946)
(0.007400  0.000000  0.000898)
(0.006918  0.000000  0.000851)
(0.006463  0.000000  0.000804)
(0.006032  0.000000  0.000760)
(0.005626  0.000000  0.000716)
(0.005244  0.000000  0.000674)
(0.004884  0.000000  0.000634)
(0.004545  0.000000  0.000596)
(0.004228  0.000000  0.000559)
(0.003930  0.000000  0.000524)
(0.003652  0.000000  0.000490)
(0.003391  0.000000  0.000459)
(0.003148  0.000000  0.000428)
(0.002920  0.000000  0.000400)
(0.002708  0.000000  0.000373)
(0.002510  0.000000  0.000348)
(0.002326  0.000000  0.000324)
(0.002154  0.000000  0.000301)
(0.001995  0.000000  0.000280)
(0.001846  0.000000  0.000261)
(0.001708  0.000000  0.000242)
(0.001580  0.000000  0.000225)
(0.001462  0.000000  0.000209)
(0.001351  0.000000  0.000193)
(0.001249  0.000000  0.000179)
(0.001154  0.000000  0.000166)
(0.001067  0.000000  0.000154)
(0.000985  0.000000  0.000143)
(0.000910  0.000000  0.000132)
(0.000841  0.000000  0.000122)
(0.000776  0.000000  0.000113)
(0.000717  0.000000  0.000105)
(0.000661  0.000000  0.000097)
(0.000610  0.000000  0.000089)
(0.000563  0.000000  0.000083)
(0.000520  0.000000  0.000076)
(0.000480  0.000000  0.000070)
(0.000443  0.000000  0.000065)
(0.000408  0.000000  0.000060)
(0.000377  0.000000  0.000056)
(0.000347  0.000000  0.000051)
(0.000320  0.000000  0.000047)
(0.000295  0.000000  0.000044)
(0.000272  0.000000  0.000040)
(0.000251  0.000000  0.000037)
(0.000232  0.000000  0.000034)
(0.000214  0.000000  0.000032)
(0.000197  0.000000  0.000029)
(0.000182  0.000000  0.000027)
(0.000167  0.000000  0.000025)
(0.000154  0.000000  0.000023)
(0.000142  0.000000  0.000021)
(0.000131  0.000000  0.000019)
(0.000121  0.000000  0.000018)
(0.000111  0.000000  0.000017)
(0.000103  0.000000  0.000015)
(0.000095  0.000000  0.000014)
(0.000087  0.000000  0.000013)
(0.000080  0.000000  0.000012)
(0.000074  0.000000  0.000011)
(0.000068  0.000000  0.000010)
(0.000063  0.000000  0.000009)
(0.000058  0.000000  0.000009)
(0.000053  0.000000  0.000008)
(0.000049  0.000000  0.000007)
(0.000045  0.000000  0.000007)
(0.000042  0.000000  0.000006)
(0.000039  0.000000  0.000006)
(0.000036  0.000000  0.000005)
(0.000033  0.000000  0.000005)
(0.000030  0.000000  0.000005)
(0.000028  0.000000  0.000004)
(0.000026  0.000000  0.000004)
(0.000024  0.000000  0.000004)
(0.000022  0.000000  0.000003)
(0.000020  0.000000  0.000003)
(0.000018  0.000000  0.000003)
(0.000017  0.000000  0.000003)
(0.000016  0.000000  0.000002)
(0.000014  0.000000  0.000002)
(0.000013  0.000000  0.000002)
(0.000012  0.000000  0.000002)
(0.000011  0.000000  0.000002)
(0.000010  0.000000  0.000002)
(0.000010  0.000000  0.000001)
(0.000009  0.000000  0.000001)
(0.000000  0.000000  0.000000)
(0.000000  0.000000  -0.000000)
(0.000000  0.000000  0.000000)
(0.000000  0.000000  -0.000000)
(0.000000  0.000000  0.000000)
(0.000000  0.000000  -0.000000)
(0.000000  0.000000  0.000000)
(0.000000  0.000000  -0.000000)
(0.000000  0.000000  0.000000)
(0.000000  0.000000  -0.000000)
(0.000000  0.000000  0.000000)
(0.000000  0.000000  -0.000000)
(0.000000  0.000000  0.000000)
(0.000000  0.000000  -0.000000)
(0.000000  0.000000  0.000000)
(0.000000  0.000000  -0.000000)
(0.000000  0.000000  0.000000)
(0.000000  0.000000  -0.000000)
(0.000000  0.000000  0.000000)
(0.000000  0.000000  -0.000000)
(0.000000  0.000000  0.000000)
(0.000000  0.000000  -0.000000)
(0.000000  0.000000  0.000000)
(0.000000  0.000000  -0.000000)
(0.000000  0.000000  0.000000)
(0.000000  0.000000  -0.000000)
(0.000000  0.000000  0.000000)
(0.000000  0.000000  -0.000000)
(0.000000  0.000000  0.000000)
(0.000000  0.000000  -0.000000)
(0.000000  0.000000  0.000000)
(0.000000  0.000000  -0.000000)
(0.000000  0.000000  0.000000)
(0.000000  0.000000  -0.000000)
(0.000000  0.000000  -0.000000)
(0.000000  0.000000  0.000000)
(0.000000  0.000000  -0.000000)
(0.000000  0.000000  -0.000000)
(0.000000  0.000000  0.000000)
(0.000000  0.000000  -0.000000)
(0.000000  0.000000  0.000000)
(0.000000  0.000000  -0.000000)
(0.000000  0.000000  0.000000)
(0.000000  0.000000  0.000000)
(0.000000  0.000000  -0.000000)
(0.000000  0.000000  -0.000000)
(0.000000  0.000000  -0.000000)
(0.000000  0.000000  -0.000000)
(0.000000  0.000000  0.000000)
(0.000000  0.000000  -0.000000)
(0.000000  0.000000  -0.000000)
(0.000000  0.000000  0.000000)
(0.000000  0.000000  -0.000000)
(0.000000  0.000000  0.000000)
(0.000000  0.000000  -0.000000)
(0.000000  0.000000  0.000000)
(0.000000  0.000000  -0.000000)
(0.000000  0.000000  0.000000)
(0.000000  0.000000  0.000000)
(0.000000  0.000000  -0.000000)
(0.000000  0.000000  0.000000)
(0.000000  0.000000  -0.000000)
(0.000000  0.000000  0.000000)
(0.000000  0.000000  0.000000)
(0.000000  0.000000  -0.000000)
(0.000000  0.000000  0.000000)
(0.000000  0.000000  -0.000000)
(0.000000  0.000000  0.000000)
(0.000000  0.000000  -0.000000)
(0.000000  0.000000  -0.000000)
(0.000000  0.000000  -0.000000)
(0.000000  0.000000  0.000000)
(0.000000  0.000000  0.000000)
(0.000000  0.000000  0.000000)
(0.000000  0.000000  -0.000000)
(0.000000  0.000000  -0.000000)
(0.000000  0.000000  0.000000)
(0.000000  0.000000  0.000000)
(0.000000  0.000000  -0.000000)
(0.000000  0.000000  -0.000000)
(0.000000  0.000000  0.000000)
(0.000000  0.000000  -0.000000)
(0.000000  0.000000  -0.000000)
(0.000000  0.000000  0.000000)
(0.000000  0.000000  -0.000000)
(0.000000  0.000000  -0.000000)
(0.000000  0.000000  0.000000)
(0.000000  0.000000  0.000000)
(0.000000  0.000000  -0.000000)
(0.000000  0.000000  -0.000000)
(0.000000  0.000000  -0.000000)
(0.000000  0.000000  0.000000)
(0.000000  0.000000  -0.000000)
(0.000000  0.000000  0.000000)
(0.000000  0.000000  -0.000000)
(-0.000000  0.000000  0.000000)
(0.000000  0.000000  0.000000)
(0.000000  0.000000  0.000000)
(0.000000  0.000000  -0.000000)
(0.000000  0.000000  0.000000)
(0.000000  0.000000  -0.000000)
(0.000000  0.000000  0.000000)
(-0.000000  0.000000  -0.000000)
(-0.000000  0.000000  0.000000)
(0.000000  0.000000  0.000000)
(0.000000  0.000000  -0.000000)
(0.000000  0.000000  0.000000)
(-0.000000  0.000000  -0.000000)
(-0.000000  0.000000  -0.000000)
(-0.000000  0.000000  0.000000)
(0.000000  0.000000  -0.000000)
(0.000000  0.000000  0.000000)
(-0.000000  0.000000  -0.000000)
(0.000000  0.000000  0.000000)
(-0.000000  0.000000  -0.000000)
(0.000000  0.000000  -0.000000)
(-0.000000  0.000000  -0.000000)
(0.000000  0.000000  -0.000000)
(-0.000000  0.000000  0.000000)
(0.000000  0.000000  -0.000000)
(-0.000000  0.000000  -0.000000)
(-0.000000  0.000000  0.000000)
(-0.000000  0.000000  -0.000000)
(0.000000  0.000000  0.000000)
(0.000000  0.000000  -0.000000)
(0.000000  0.000000  -0.000000)
(0.000000  0.000000  0.000000)
(-0.000000  0.000000  0.000000)
(-0.000000  0.000000  0.000000)
(0.000000  0.000000  -0.000000)
(-0.000000  0.000000  -0.000000)
(0.000000  0.000000  0.000000)
(-0.000000  0.000000  0.000000)
(-0.000000  0.000000  0.000000)
(-0.000000  0.000000  -0.000000)
(-0.000000  0.000000  0.000000)
(0.000000  0.000000  0.000000)
(-0.000000  0.000000  0.000000)
(-0.000000  0.000000  -0.000000)
(-0.000000  0.000000  -0.000000)
(-0.000000  0.000000  -0.000000)
(-0.000000  0.000000  0.000000)
(-0.000000  0.000000  -0.000000)
(-0.000000  0.000000  0.000000)
(-0.000000  0.000000  -0.000000)
(-0.000000  0.000000  0.000000)
(-0.000000  0.000000  0.000000)
(0.000000  0.000000  -0.000000)
(-0.000000  0.000000  0.000000)
(-0.000000  0.000000  0.000000)
(-0.000000  0.000000  -0.000000)
(-0.000000  0.000000  -0.000000)
(-0.000000  0.000000  0.000000)
(-0.000000  0.000000  -0.000000)
(-0.000000  0.000000  -0.000000)
(-0.000000  0.000000  -0.000000)
(-0.000000  0.000000  0.000000)
(-0.000000  0.000000  -0.000000)
(-0.000000  0.000000  -0.000000)
(-0.000000  0.000000  0.000000)
(-0.000000  0.000000  -0.000000)
(-0.000000  0.000000  0.000000)
(-0.000000  0.000000  -0.000000)
(-0.000000  0.000000  -0.000000)
(-0.000000  0.000000  0.000000)
(-0.000000  0.000000  -0.000000)
(-0.000000  0.000000  0.000000)
(0.000000  0.000000  0.000000)
(-0.000000  0.000000  -0.000000)
(-0.000000  0.000000  0.000000)
(-0.000000  0.000000  -0.000000)
(-0.000000  0.000000  -0.000000)
(-0.000000  0.000000  0.000000)
(0.000000  0.000000  -0.000000)
(-0.000000  0.000000  -0.000000)
(-0.000000  0.000000  -0.000000)
(0.000000  0.000000  -0.000000)
(0.000000  0.000000  -0.000000)
(0.000000  0.000000  -0.000000)
(0.000000  0.000000  -0.000000)
(0.000000  0.000000  -0.000000)
(0.000000  0.000000  -0.000000)
(0.000000  0.000000  -0.000000)
(0.000000  0.000000  -0.000000)
(0.000000  0.000000  -0.000000)
(0.000000  0.000000  -0.000000)
(0.000000  0.000000  -0.000000)
(0.000000  0.000000  -0.000000)
(0.000000  0.000000  -0.000000)
(0.000000  0.000000  -0.000000)
(0.000000  0.000000  -0.000000)
(0.000000  0.000000  -0.000000)
(0.000000  0.000000  -0.000000)
(0.000000  0.000000  -0.000000)
(0.000000  0.000000  -0.000000)
(0.000000  0.000000  -0.000000)
(0.000000  0.000000  -0.000000)
(0.000000  0.000000  -0.000000)
(0.000000  0.000000  -0.000000)
(0.000000  0.000000  -0.000000)
(0.000000  0.000000  -0.000000)
(0.000000  0.000000  -0.000000)
(0.000000  0.000000  -0.000000)
(0.000000  0.000000  -0.000000)
(0.000000  0.000000  -0.000000)
(0.000000  0.000000  -0.000000)
(0.000000  0.000000  -0.000000)
(0.000000  0.000000  -0.000000)
(0.000000  0.000000  -0.000000)
(0.000000  0.000000  -0.000000)
(0.000000  0.000000  -0.000000)
(0.000000  0.000000  -0.000000)
(0.000000  0.000000  -0.000000)
(0.000000  0.000000  -0.000000)
(0.000000  0.000000  -0.000000)
(0.000000  0.000000  -0.000000)
(0.000000  0.000000  -0.000000)
(0.000000  0.000000  -0.000000)
(0.000000  0.000000  -0.000000)
(0.000000  0.000000  -0.000000)
(0.000000  0.000000  -0.000000)
(0.000000  0.000000  -0.000000)
(0.000000  0.000000  -0.000000)
(0.000000  0.000000  -0.000000)
(0.000000  0.000000  -0.000000)
(0.000000  0.000000  -0.000000)
(0.000000  0.000000  -0.000000)
(0.000000  0.000000  -0.000000)
(0.000000  0.000000  -0.000000)
(0.000000  0.000000  -0.000000)
(0.000000  0.000000  -0.000000)
(0.000000  0.000000  -0.000000)
(0.000000  0.000000  -0.000000)
(0.000000  0.000000  -0.000000)
(0.000000  0.000000  -0.000000)
(0.000000  0.000000  -0.000000)
(0.000000  0.000000  -0.000000)
(0.000000  0.000000  -0.000000)
(0.000000  0.000000  -0.000000)
(0.000000  0.000000  -0.000000)
(0.000000  0.000000  -0.000000)
(0.000000  0.000000  -0.000000)
(0.000000  0.000000  -0.000000)
(0.000000  0.000000  -0.000000)
(0.000000  0.000000  -0.000000)
(0.000000  0.000000  -0.000000)
(0.000000  0.000000  -0.000000)
(0.000000  0.000000  -0.000000)
(0.000000  0.000000  -0.000000)
(0.000000  0.000000  -0.000000)
(0.000000  0.000000  -0.000000)
(0.000000  0.000000  -0.000000)
(0.000000  0.000000  -0.000000)
(0.000000  0.000000  -0.000000)
(0.000000  0.000000  -0.000000)
(0.000000  0.000000  -0.000000)
(0.000000  0.000000  -0.000000)
(0.000000  0.000000  -0.000000)
(0.000000  0.000000  -0.000000)
(0.000000  0.000000  -0.000000)
(0.000000  0.000000  -0.000000)
(0.000000  0.000000  -0.000000)
(0.000000  0.000000  -0.000000)
(0.000000  0.000000  -0.000000)
(0.000000  0.000000  -0.000000)
(0.000000  0.000000  -0.000000)
(0.000000  0.000000  -0.000000)
(0.000000  0.000000  -0.000000)
(0.000000  0.000000  -0.000000)
(0.000000  0.000000  -0.000000)
(0.000000  0.000000  -0.000000)
(0.000000  0.000000  -0.000000)
(0.000000  0.000000  -0.000000)
(0.000000  0.000000  -0.000000)
(0.000000  0.000000  -0.000000)
(0.000000  0.000000  -0.000000)
(0.000000  0.000000  -0.000000)
(0.000000  0.000000  -0.000000)
(0.000000  0.000000  -0.000000)
(0.000000  0.000000  -0.000000)
(0.000000  0.000000  -0.000000)
(0.000000  0.000000  -0.000000)
(0.000000  0.000000  -0.000000)
(0.000000  0.000000  -0.000000)
(0.000000  0.000000  -0.000000)
(0.000000  0.000000  -0.000000)
(0.000000  0.000000  -0.000000)
(0.000000  0.000000  -0.000000)
(0.000000  0.000000  -0.000000)
(0.000000  0.000000  -0.000000)
(0.000000  0.000000  -0.000000)
(0.000000  0.000000  -0.000000)
(0.000000  0.000000  -0.000000)
(0.000000  0.000000  -0.000000)
(0.000000  0.000000  -0.000000)
(0.000000  0.000000  -0.000000)
(0.000000  0.000000  -0.000000)
(0.000000  0.000000  -0.000000)
(0.000000  0.000000  -0.000000)
(0.000000  0.000000  -0.000000)
(0.000000  0.000000  -0.000000)
(0.000000  0.000000  -0.000000)
(0.000000  0.000000  -0.000000)
(0.000000  0.000000  -0.000000)
(0.000000  0.000000  -0.000000)
(0.000000  0.000000  -0.000000)
(0.000000  0.000000  -0.000000)
(0.000000  0.000000  -0.000000)
(0.000000  0.000000  -0.000000)
(0.000000  0.000000  -0.000000)
(0.000000  0.000000  -0.000000)
(0.000000  0.000000  -0.000000)
(0.000000  0.000000  -0.000000)
(0.000000  0.000000  -0.000000)
(0.000000  0.000000  -0.000000)
(0.000000  0.000000  -0.000000)
(0.000000  0.000000  -0.000000)
(0.000000  0.000000  -0.000000)
(0.000000  0.000000  -0.000000)
(0.000000  0.000000  -0.000000)
(0.000000  0.000000  -0.000000)
(0.000000  0.000000  -0.000000)
(0.000000  0.000000  -0.000000)
(0.000000  0.000000  -0.000000)
(0.000000  0.000000  -0.000000)
(0.000000  0.000000  -0.000000)
(0.000000  0.000000  -0.000000)
(0.000000  0.000000  -0.000000)
(0.000000  0.000000  -0.000000)
(0.000000  0.000000  -0.000000)
(0.000000  0.000000  -0.000000)
(0.000000  0.000000  -0.000000)
(0.000000  0.000000  -0.000000)
(0.000000  0.000000  -0.000000)
(0.000000  0.000000  -0.000000)
(0.000000  0.000000  -0.000000)
(0.000000  0.000000  -0.000000)
(0.000000  0.000000  -0.000000)
(0.000000  0.000000  -0.000000)
(0.000000  0.000000  -0.000000)
(0.000000  0.000000  -0.000000)
(0.000000  0.000000  -0.000000)
(0.000000  0.000000  -0.000000)
(0.000000  0.000000  -0.000000)
(0.000000  0.000000  -0.000000)
(0.000000  0.000000  -0.000000)
(0.000000  0.000000  -0.000000)
(0.000000  0.000000  -0.000000)
(0.000000  0.000000  -0.000000)
(0.000000  0.000000  -0.000000)
(0.000000  0.000000  -0.000000)
(0.000000  0.000000  -0.000000)
(0.000000  0.000000  -0.000000)
(0.000000  0.000000  -0.000000)
(0.000000  0.000000  -0.000000)
(0.000000  0.000000  -0.000000)
(0.000000  0.000000  -0.000000)
(0.000000  0.000000  -0.000000)
(0.000000  0.000000  -0.000000)
(0.000000  0.000000  -0.000000)
(0.000000  0.000000  -0.000000)
(0.000000  0.000000  -0.000000)
(0.000000  0.000000  -0.000000)
(0.000000  0.000000  -0.000000)
(0.000000  0.000000  -0.000000)
(0.000000  0.000000  -0.000000)
(0.000000  0.000000  -0.000000)
(0.000000  0.000000  -0.000000)
(0.000000  0.000000  -0.000000)
(0.000000  0.000000  -0.000000)
(0.000000  0.000000  -0.000000)
(0.000000  0.000000  -0.000000)
(0.000000  0.000000  -0.000000)
(0.000000  0.000000  -0.000000)
(0.000000  0.000000  -0.000000)
(0.000000  0.000000  -0.000000)
(0.000000  0.000000  -0.000000)
(0.000000  0.000000  -0.000000)
(0.000000  0.000000  -0.000000)
(0.000000  0.000000  -0.000000)
(0.000000  0.000000  -0.000000)
(0.000000  0.000000  -0.000000)
(0.000000  0.000000  -0.000000)
(0.000000  0.000000  -0.000000)
(0.000000  0.000000  -0.000000)
(0.000000  0.000000  -0.000000)
(0.000000  0.000000  -0.000000)
(0.000000  0.000000  -0.000000)
(0.000000  0.000000  -0.000000)
(0.000000  0.000000  -0.000000)
(0.000000  0.000000  -0.000000)
(0.000000  0.000000  -0.000000)
(0.000000  0.000000  -0.000000)
(0.000000  0.000000  -0.000000)
(0.000000  0.000000  -0.000000)
(0.000000  0.000000  -0.000000)
(0.000000  0.000000  -0.000000)
(0.000000  0.000000  -0.000000)
(0.000000  0.000000  -0.000000)
(0.000000  0.000000  -0.000000)
(0.000000  0.000000  -0.000000)
(0.000000  0.000000  -0.000000)
(0.000000  0.000000  -0.000000)
(0.000000  0.000000  -0.000000)
(0.000000  0.000000  -0.000000)
(0.000000  0.000000  -0.000000)
(0.000000  0.000000  -0.000000)
(0.000000  0.000000  -0.000000)
(0.000000  0.000000  -0.000000)
(0.000000  0.000000  -0.000000)
(0.000000  0.000000  -0.000000)
(0.000000  0.000000  -0.000000)
(0.000000  0.000000  -0.000000)
(0.000000  0.000000  -0.000000)
(0.000000  0.000000  -0.000000)
(0.000000  0.000000  -0.000000)
(0.000000  0.000000  -0.000000)
(0.000000  0.000000  -0.000000)
(0.000000  0.000000  -0.000000)
(0.000000  0.000000  -0.000000)
(0.000000  0.000000  -0.000000)
(0.000000  0.000000  -0.000000)
(0.000000  0.000000  -0.000000)
(0.000000  0.000000  -0.000000)
(0.000000  0.000000  -0.000000)
(0.000000  0.000000  -0.000000)
(0.000000  0.000000  -0.000000)
(0.000000  0.000000  -0.000000)
(0.000000  0.000000  -0.000000)
(0.000000  0.000000  -0.000000)
(0.000000  0.000000  -0.000000)
(0.000000  0.000000  -0.000000)
(0.000000  0.000000  -0.000000)
(0.000000  0.000000  -0.000000)
(0.000000  0.000000  -0.000000)
(0.000000  0.000000  -0.000000)
(0.000000  0.000000  -0.000000)
(0.000000  0.000000  -0.000000)
(0.000000  0.000000  -0.000000)
(0.000000  0.000000  -0.000000)
(0.000000  0.000000  -0.000000)
(0.000000  0.000000  -0.000000)
(0.000000  0.000000  -0.000000)
(0.000000  0.000000  -0.000000)
(0.000000  0.000000  -0.000000)
(0.000000  0.000000  -0.000000)
(0.000000  0.000000  -0.000000)
(0.000000  0.000000  -0.000000)
(0.000000  0.000000  -0.000000)
(0.000000  0.000000  -0.000000)
(0.000000  0.000000  -0.000000)
(0.000000  0.000000  -0.000000)
(0.000000  0.000000  -0.000000)
(0.000000  0.000000  -0.000000)
(0.000000  0.000000  -0.000000)
(0.000000  0.000000  -0.000000)
(0.000000  0.000000  -0.000000)
(0.000000  0.000000  -0.000000)
(0.000000  0.000000  -0.000000)
(0.000000  0.000000  -0.000000)
(0.000000  0.000000  -0.000000)
(0.000000  0.000000  -0.000000)
(0.000000  0.000000  -0.000000)
(0.000000  0.000000  -0.000000)
(0.000000  0.000000  -0.000000)
(0.000001  0.000000  -0.000000)
(0.000001  0.000000  -0.000000)
(0.000001  0.000000  -0.000000)
(0.000001  0.000000  -0.000000)
(0.000001  0.000000  -0.000000)
(0.000001  0.000000  -0.000000)
(0.000001  0.000000  -0.000000)
(0.000001  0.000000  -0.000000)
(0.000001  0.000000  -0.000000)
(0.000001  0.000000  -0.000000)
(0.000001  0.000000  -0.000000)
(0.000001  0.000000  -0.000000)
(0.000001  0.000000  -0.000000)
(0.000001  0.000000  -0.000000)
(0.000002  0.000000  -0.000000)
(0.000002  0.000000  -0.000000)
(0.000002  0.000000  -0.000000)
(0.000002  0.000000  -0.000000)
(0.000002  0.000000  -0.000000)
(0.000002  0.000000  -0.000000)
(0.000003  0.000000  -0.000000)
(0.000003  0.000000  -0.000000)
(0.000003  0.000000  -0.000000)
(0.000003  0.000000  -0.000001)
(0.000004  0.000000  -0.000001)
(0.000004  0.000000  -0.000001)
(0.000004  0.000000  -0.000001)
(0.000005  0.000000  -0.000001)
(0.000005  0.000000  -0.000001)
(0.000005  0.000000  -0.000001)
(0.000006  0.000000  -0.000001)
(0.000006  0.000000  -0.000001)
(0.000007  0.000000  -0.000001)
(0.000008  0.000000  -0.000001)
(0.000008  0.000000  -0.000001)
(0.000009  0.000000  -0.000001)
(0.000010  0.000000  -0.000002)
(0.000010  0.000000  -0.000002)
(0.000011  0.000000  -0.000002)
(0.000012  0.000000  -0.000002)
(0.000013  0.000000  -0.000002)
(0.000014  0.000000  -0.000002)
(0.000016  0.000000  -0.000003)
(0.000017  0.000000  -0.000003)
(0.000018  0.000000  -0.000003)
(0.000020  0.000000  -0.000003)
(0.000022  0.000000  -0.000003)
(0.000024  0.000000  -0.000004)
(0.000026  0.000000  -0.000004)
(0.000028  0.000000  -0.000004)
(0.000030  0.000000  -0.000005)
(0.000033  0.000000  -0.000005)
(0.000036  0.000000  -0.000006)
(0.000039  0.000000  -0.000006)
(0.000042  0.000000  -0.000007)
(0.000045  0.000000  -0.000007)
(0.000049  0.000000  -0.000008)
(0.000053  0.000000  -0.000009)
(0.000058  0.000000  -0.000009)
(0.000063  0.000000  -0.000010)
(0.000068  0.000000  -0.000011)
(0.000074  0.000000  -0.000012)
(0.000080  0.000000  -0.000013)
(0.000087  0.000000  -0.000014)
(0.000095  0.000000  -0.000015)
(0.000103  0.000000  -0.000016)
(0.000111  0.000000  -0.000018)
(0.000121  0.000000  -0.000019)
(0.000131  0.000000  -0.000021)
(0.000142  0.000000  -0.000023)
(0.000154  0.000000  -0.000024)
(0.000167  0.000000  -0.000027)
(0.000181  0.000000  -0.000029)
(0.000197  0.000000  -0.000031)
(0.000213  0.000000  -0.000034)
(0.000231  0.000000  -0.000037)
(0.000251  0.000000  -0.000040)
(0.000272  0.000000  -0.000043)
(0.000295  0.000000  -0.000047)
(0.000320  0.000000  -0.000051)
(0.000347  0.000000  -0.000055)
(0.000376  0.000000  -0.000059)
(0.000408  0.000000  -0.000064)
(0.000442  0.000000  -0.000070)
(0.000479  0.000000  -0.000075)
(0.000519  0.000000  -0.000082)
(0.000563  0.000000  -0.000088)
(0.000610  0.000000  -0.000095)
(0.000660  0.000000  -0.000103)
(0.000715  0.000000  -0.000112)
(0.000775  0.000000  -0.000121)
(0.000839  0.000000  -0.000131)
(0.000909  0.000000  -0.000141)
(0.000984  0.000000  -0.000152)
(0.001065  0.000000  -0.000165)
(0.001153  0.000000  -0.000178)
(0.001247  0.000000  -0.000192)
(0.001350  0.000000  -0.000207)
(0.001460  0.000000  -0.000223)
(0.001578  0.000000  -0.000240)
(0.001706  0.000000  -0.000259)
(0.001844  0.000000  -0.000278)
(0.001992  0.000000  -0.000300)
(0.002151  0.000000  -0.000322)
(0.002323  0.000000  -0.000346)
(0.002507  0.000000  -0.000372)
(0.002705  0.000000  -0.000399)
(0.002917  0.000000  -0.000427)
(0.003144  0.000000  -0.000458)
(0.003387  0.000000  -0.000490)
(0.003648  0.000000  -0.000524)
(0.003926  0.000000  -0.000560)
(0.004223  0.000000  -0.000597)
(0.004541  0.000000  -0.000637)
(0.004878  0.000000  -0.000678)
(0.005238  0.000000  -0.000721)
(0.005621  0.000000  -0.000765)
(0.006027  0.000000  -0.000812)
(0.006457  0.000000  -0.000860)
(0.006912  0.000000  -0.000909)
(0.007394  0.000000  -0.000960)
(0.007902  0.000000  -0.001012)
(0.008437  0.000000  -0.001064)
(0.009000  0.000000  -0.001118)
(0.009590  0.000000  -0.001171)
(0.010209  0.000000  -0.001225)
(0.010855  0.000000  -0.001278)
(0.011529  0.000000  -0.001331)
(0.012230  0.000000  -0.001383)
(0.012958  0.000000  -0.001433)
(0.013712  0.000000  -0.001481)
(0.014490  0.000000  -0.001526)
(0.015291  0.000000  -0.001569)
(0.016114  0.000000  -0.001607)
(0.016955  0.000000  -0.001641)
(0.017813  0.000000  -0.001671)
(0.018686  0.000000  -0.001694)
(0.019569  0.000000  -0.001712)
(0.020461  0.000000  -0.001723)
(0.021356  0.000000  -0.001727)
(0.022252  0.000000  -0.001723)
(0.023144  0.000000  -0.001711)
(0.024028  0.000000  -0.001691)
(0.024899  0.000000  -0.001661)
(0.025753  0.000000  -0.001623)
(0.026585  0.000000  -0.001575)
(0.027389  0.000000  -0.001518)
(0.028162  0.000000  -0.001451)
(0.028898  0.000000  -0.001375)
(0.029592  0.000000  -0.001291)
(0.030239  0.000000  -0.001197)
(0.030836  0.000000  -0.001095)
(0.031379  0.000000  -0.000986)
(0.031862  0.000000  -0.000870)
(0.032284  0.000000  -0.000747)
(0.032640  0.000000  -0.000619)
(0.032928  0.000000  -0.000486)
(0.033146  0.000000  -0.000350)
(0.033292  0.000000  -0.000211)
(0.033365  0.000000  -0.000071)
(0.033365  0.000000  0.000071)
(0.033292  0.000000  0.000211)
(0.033146  0.000000  0.000350)
(0.032928  0.000000  0.000486)
(0.032640  0.000000  0.000619)
(0.032284  0.000000  0.000747)
(0.031862  0.000000  0.000870)
(0.031379  0.000000  0.000986)
(0.030836  0.000000  0.001095)
(0.030239  0.000000  0.001197)
(0.029592  0.000000  0.001291)
(0.028898  0.000000  0.001375)
(0.028162  0.000000  0.001451)
(0.027389  0.000000  0.001518)
(0.026585  0.000000  0.001575)
(0.025753  0.000000  0.001623)
(0.024899  0.000000  0.001661)
(0.024028  0.000000  0.001691)
(0.023144  0.000000  0.001711)
(0.022252  0.000000  0.001723)
(0.021356  0.000000  0.001727)
(0.020461  0.000000  0.001723)
(0.019569  0.000000  0.001712)
(0.018686  0.000000  0.001694)
(0.017813  0.000000  0.001671)
(0.016955  0.000000  0.001641)
(0.016114  0.000000  0.001607)
(0.015291  0.000000  0.001569)
(0.014490  0.000000  0.001526)
(0.013712  0.000000  0.001481)
(0.012958  0.000000  0.001433)
(0.012230  0.000000  0.001383)
(0.011529  0.000000  0.001331)
(0.010855  0.000000  0.001278)
(0.010209  0.000000  0.001225)
(0.009590  0.000000  0.001171)
(0.009000  0.000000  0.001118)
(0.008437  0.000000  0.001064)
(0.007902  0.000000  0.001012)
(0.007394  0.000000  0.000960)
(0.006912  0.000000  0.000909)
(0.006457  0.000000  0.000860)
(0.006027  0.000000  0.000812)
(0.005621  0.000000  0.000765)
(0.005238  0.000000  0.000721)
(0.004878  0.000000  0.000678)
(0.004541  0.000000  0.000637)
(0.004223  0.000000  0.000597)
(0.003926  0.000000  0.000560)
(0.003648  0.000000  0.000524)
(0.003387  0.000000  0.000490)
(0.003144  0.000000  0.000458)
(0.002917  0.000000  0.000427)
(0.002705  0.000000  0.000399)
(0.002507  0.000000  0.000372)
(0.002323  0.000000  0.000346)
(0.002151  0.000000  0.000322)
(0.001992  0.000000  0.000300)
(0.001844  0.000000  0.000278)
(0.001706  0.000000  0.000259)
(0.001578  0.000000  0.000240)
(0.001460  0.000000  0.000223)
(0.001350  0.000000  0.000207)
(0.001247  0.000000  0.000192)
(0.001153  0.000000  0.000178)
(0.001065  0.000000  0.000165)
(0.000984  0.000000  0.000152)
(0.000909  0.000000  0.000141)
(0.000839  0.000000  0.000131)
(0.000775  0.000000  0.000121)
(0.000715  0.000000  0.000112)
(0.000660  0.000000  0.000103)
(0.000610  0.000000  0.000095)
(0.000563  0.000000  0.000088)
(0.000519  0.000000  0.000082)
(0.000479  0.000000  0.000075)
(0.000442  0.000000  0.000070)
(0.000408  0.000000  0.000064)
(0.000376  0.000000  0.000059)
(0.000347  0.000000  0.000055)
(0.000320  0.000000  0.000051)
(0.000295  0.000000  0.000047)
(0.000272  0.000000  0.000043)
(0.000251  0.000000  0.000040)
(0.000231  0.000000  0.000037)
(0.000213  0.000000  0.000034)
(0.000197  0.000000  0.000031)
(0.000181  0.000000  0.000029)
(0.000167  0.000000  0.000027)
(0.000154  0.000000  0.000024)
(0.000142  0.000000  0.000023)
(0.000131  0.000000  0.000021)
(0.000121  0.000000  0.000019)
(0.000111  0.000000  0.000018)
(0.000103  0.000000  0.000016)
(0.000095  0.000000  0.000015)
(0.000087  0.000000  0.000014)
(0.000080  0.000000  0.000013)
(0.000074  0.000000  0.000012)
(0.000068  0.000000  0.000011)
(0.000063  0.000000  0.000010)
(0.000058  0.000000  0.000009)
(0.000053  0.000000  0.000009)
(0.000049  0.000000  0.000008)
(0.000045  0.000000  0.000007)
(0.000042  0.000000  0.000007)
(0.000039  0.000000  0.000006)
(0.000036  0.000000  0.000006)
(0.000033  0.000000  0.000005)
(0.000030  0.000000  0.000005)
(0.000028  0.000000  0.000004)
(0.000026  0.000000  0.000004)
(0.000024  0.000000  0.000004)
(0.000022  0.000000  0.000003)
(0.000020  0.000000  0.000003)
(0.000018  0.000000  0.000003)
(0.000017  0.000000  0.000003)
(0.000016  0.000000  0.000003)
(0.000014  0.000000  0.000002)
(0.000013  0.000000  0.000002)
(0.000012  0.000000  0.000002)
(0.000011  0.000000  0.000002)
(0.000010  0.000000  0.000002)
(0.000010  0.000000  0.000002)
(0.000009  0.000000  0.000001)
(-0.000000  0.000000  0.000000)
(-0.000000  0.000000  -0.000000)
(-0.000000  0.000000  0.000000)
(-0.000000  0.000000  -0.000000)
(-0.000000  0.000000  -0.000000)
(-0.000000  0.000000  -0.000000)
(-0.000000  0.000000  0.000000)
(-0.000000  0.000000  -0.000000)
(-0.000000  0.000000  -0.000000)
(-0.000000  0.000000  -0.000000)
(-0.000000  0.000000  -0.000000)
(-0.000000  0.000000  0.000000)
(-0.000000  0.000000  -0.000000)
(-0.000000  0.000000  0.000000)
(-0.000000  0.000000  -0.000000)
(-0.000000  0.000000  0.000000)
(-0.000000  0.000000  -0.000000)
(-0.000000  0.000000  -0.000000)
(-0.000000  0.000000  0.000000)
(-0.000000  0.000000  -0.000000)
(-0.000000  0.000000  0.000000)
(-0.000000  0.000000  -0.000000)
(-0.000000  0.000000  0.000000)
(-0.000000  0.000000  -0.000000)
(0.000000  0.000000  0.000000)
(-0.000000  0.000000  -0.000000)
(-0.000000  0.000000  0.000000)
(-0.000000  0.000000  0.000000)
(-0.000000  0.000000  -0.000000)
(-0.000000  0.000000  0.000000)
(-0.000000  0.000000  -0.000000)
(-0.000000  0.000000  -0.000000)
(-0.000000  0.000000  0.000000)
(-0.000000  0.000000  0.000000)
(-0.000000  0.000000  -0.000000)
(-0.000000  0.000000  0.000000)
(0.000000  0.000000  -0.000000)
(-0.000000  0.000000  -0.000000)
(0.000000  0.000000  0.000000)
(-0.000000  0.000000  -0.000000)
(0.000000  0.000000  0.000000)
(0.000000  0.000000  -0.000000)
(0.000000  0.000000  0.000000)
(0.000000  0.000000  -0.000000)
(0.000000  0.000000  0.000000)
(0.000000  0.000000  -0.000000)
(0.000000  0.000000  0.000000)
(-0.000000  0.000000  0.000000)
(-0.000000  0.000000  -0.000000)
(0.000000  0.000000  0.000000)
(0.000000  0.000000  -0.000000)
(-0.000000  0.000000  0.000000)
(-0.000000  0.000000  0.000000)
(-0.000000  0.000000  0.000000)
(0.000000  0.000000  -0.000000)
(0.000000  0.000000  0.000000)
(0.000000  0.000000  0.000000)
(0.000000  0.000000  -0.000000)
(-0.000000  0.000000  -0.000000)
(-0.000000  0.000000  0.000000)
(0.000000  0.000000  -0.000000)
(0.000000  0.000000  -0.000000)
(0.000000  0.000000  0.000000)
(0.000000  0.000000  -0.000000)
(0.000000  0.000000  -0.000000)
(-0.000000  0.000000  -0.000000)
(-0.000000  0.000000  -0.000000)
(0.000000  0.000000  0.000000)
(-0.000000  0.000000  -0.000000)
(0.000000  0.000000  0.000000)
(0.000000  0.000000  -0.000000)
(-0.000000  0.000000  0.000000)
(0.000000  0.000000  0.000000)
(0.000000  0.000000  -0.000000)
(0.000000  0.000000  -0.000000)
(0.000000  0.000000  -0.000000)
(0.000000  0.000000  0.000000)
(0.000000  0.000000  0.000000)
(-0.000000  0.000000  -0.000000)
(0.000000  0.000000  -0.000000)
(0.000000  0.000000  0.000000)
(0.000000  0.000000  -0.000000)
(0.000000  0.000000  0.000000)
(0.000000  0.000000  -0.000000)
(0.000000  0.000000  -0.000000)
(-0.000000  0.000000  -0.000000)
(-0.000000  0.000000  0.000000)
(0.000000  0.000000  0.000000)
(-0.000000  0.000000  -0.000000)
(0.000000  0.000000  0.000000)
(0.000000  0.000000  0.000000)
(0.000000  0.000000  -0.000000)
(-0.000000  0.000000  0.000000)
(-0.000000  0.000000  0.000000)
(-0.000000  0.000000  0.000000)
(-0.000000  0.000000  -0.000000)
(-0.000000  0.000000  -0.000000)
(-0.000000  0.000000  0.000000)
(-0.000000  0.000000  -0.000000)
(-0.000000  0.000000  0.000000)
(-0.000000  0.000000  -0.000000)
(-0.000000  0.000000  0.000000)
(-0.000000  0.000000  0.000000)
(-0.000000  0.000000  -0.000000)
(-0.000000  0.000000  0.000000)
(-0.000000  0.000000  0.000000)
(-0.000000  0.000000  -0.000000)
(-0.000000  0.000000  0.000000)
(-0.000000  0.000000  -0.000000)
(-0.000000  0.000000  0.000000)
(-0.000000  0.000000  -0.000000)
(-0.000000  0.000000  0.000000)
(-0.000000  0.000000  -0.000000)
(-0.000000  0.000000  0.000000)
(-0.000000  0.000000  -0.000000)
(-0.000000  0.000000  0.000000)
(-0.000000  0.000000  -0.000000)
(-0.000000  0.000000  -0.000000)
(-0.000000  0.000000  0.000000)
(-0.000000  0.000000  0.000000)
(-0.000000  0.000000  0.000000)
(-0.000000  0.000000  -0.000000)
(-0.000000  0.000000  0.000000)
(-0.000000  0.000000  -0.000000)
(-0.000000  0.000000  0.000000)
(-0.000000  0.000000  -0.000000)
(-0.000000  0.000000  0.000000)
(-0.000000  0.000000  0.000000)
(-0.000000  0.000000  -0.000000)
(-0.000000  0.000000  0.000000)
(-0.000000  0.000000  -0.000000)
(-0.000000  0.000000  0.000000)
(-0.000000  0.000000  0.000000)
(0.000000  0.000000  -0.000000)
(-0.000000  0.000000  0.000000)
(-0.000000  0.000000  -0.000000)
(-0.000000  0.000000  0.000000)
(-0.000000  0.000000  0.000000)
(-0.000000  0.000000  0.000000)
(0.000000  0.000000  -0.000000)
(0.000000  0.000000  -0.000000)
(0.000000  0.000000  0.000000)
(0.000000  0.000000  0.000000)
(0.000000  0.000000  -0.000000)
(-0.000000  0.000000  0.000000)
(0.000000  0.000000  -0.000000)
(0.000000  0.000000  0.000000)
(0.000000  0.000000  -0.000000)
(0.000000  0.000000  0.000000)
(0.000000  0.000000  0.000000)
(0.000000  0.000000  0.000000)
(0.000000  0.000000  0.000000)
(0.000000  0.000000  -0.000000)
(0.000000  0.000000  -0.000000)
(0.000000  0.000000  -0.000000)
(0.000000  0.000000  0.000000)
(0.000000  0.000000  -0.000000)
(0.000000  0.000000  -0.000000)
(0.000000  0.000000  0.000000)
(0.000000  0.000000  -0.000000)
(0.000000  0.000000  -0.000000)
(0.000000  0.000000  -0.000000)
(0.000000  0.000000  0.000000)
(0.000000  0.000000  -0.000000)
(0.000000  0.000000  -0.000000)
(0.000000  0.000000  -0.000000)
(0.000000  0.000000  0.000000)
(0.000000  0.000000  -0.000000)
(0.000000  0.000000  -0.000000)
(0.000000  0.000000  0.000000)
(0.000000  0.000000  -0.000000)
(0.000000  0.000000  0.000000)
(0.000000  0.000000  -0.000000)
(0.000000  0.000000  -0.000000)
(0.000000  0.000000  0.000000)
(0.000000  0.000000  -0.000000)
(0.000000  0.000000  -0.000000)
(0.000000  0.000000  -0.000000)
(0.000000  0.000000  -0.000000)
(0.000000  0.000000  -0.000000)
(0.000000  0.000000  -0.000000)
(0.000000  0.000000  -0.000000)
(0.000000  0.000000  -0.000000)
(0.000000  0.000000  -0.000000)
(0.000000  0.000000  -0.000000)
(0.000000  0.000000  -0.000000)
(0.000000  0.000000  -0.000000)
(0.000000  0.000000  -0.000000)
(0.000000  0.000000  -0.000000)
(0.000000  0.000000  -0.000000)
(0.000000  0.000000  -0.000000)
(0.000000  0.000000  -0.000000)
(0.000000  0.000000  -0.000000)
(0.000000  0.000000  -0.000000)
(0.000000  0.000000  -0.000000)
(0.000000  0.000000  -0.000000)
(0.000000  0.000000  -0.000000)
(0.000000  0.000000  -0.000000)
(0.000000  0.000000  -0.000000)
(0.000000  0.000000  -0.000000)
(0.000000  0.000000  -0.000000)
(0.000000  0.000000  -0.000000)
(0.000000  0.000000  -0.000000)
(0.000000  0.000000  -0.000000)
(0.000000  0.000000  -0.000000)
(0.000000  0.000000  -0.000000)
(0.000000  0.000000  -0.000000)
(0.000000  0.000000  -0.000000)
(0.000000  0.000000  -0.000000)
(0.000000  0.000000  -0.000000)
(0.000000  0.000000  -0.000000)
(0.000000  0.000000  -0.000000)
(0.000000  0.000000  -0.000000)
(0.000000  0.000000  -0.000000)
(0.000000  0.000000  -0.000000)
(0.000000  0.000000  -0.000000)
(0.000000  0.000000  -0.000000)
(0.000000  0.000000  -0.000000)
(0.000000  0.000000  -0.000000)
(0.000000  0.000000  -0.000000)
(0.000000  0.000000  -0.000000)
(0.000000  0.000000  -0.000000)
(0.000000  0.000000  -0.000000)
(0.000000  0.000000  -0.000000)
(0.000000  0.000000  -0.000000)
(0.000000  0.000000  -0.000000)
(0.000000  0.000000  -0.000000)
(0.000000  0.000000  -0.000000)
(0.000000  0.000000  -0.000000)
(0.000000  0.000000  -0.000000)
(0.000000  0.000000  -0.000000)
(0.000000  0.000000  -0.000000)
(0.000000  0.000000  -0.000000)
(0.000000  0.000000  -0.000000)
(0.000000  0.000000  -0.000000)
(0.000000  0.000000  -0.000000)
(0.000000  0.000000  -0.000000)
(0.000000  0.000000  -0.000000)
(0.000000  0.000000  -0.000000)
(0.000000  0.000000  -0.000000)
(0.000000  0.000000  -0.000000)
(0.000000  0.000000  -0.000000)
(0.000000  0.000000  -0.000000)
(0.000000  0.000000  -0.000000)
(0.000000  0.000000  -0.000000)
(0.000000  0.000000  -0.000000)
(0.000000  0.000000  -0.000000)
(0.000000  0.000000  -0.000000)
(0.000000  0.000000  -0.000000)
(0.000000  0.000000  -0.000000)
(0.000000  0.000000  -0.000000)
(0.000000  0.000000  -0.000000)
(0.000000  0.000000  -0.000000)
(0.000000  0.000000  -0.000000)
(0.000000  0.000000  -0.000000)
(0.000000  0.000000  -0.000000)
(0.000000  0.000000  -0.000000)
(0.000000  0.000000  -0.000000)
(0.000000  0.000000  -0.000000)
(0.000000  0.000000  -0.000000)
(0.000000  0.000000  -0.000000)
(0.000000  0.000000  -0.000000)
(0.000000  0.000000  -0.000000)
(0.000000  0.000000  -0.000000)
(0.000000  0.000000  -0.000000)
(0.000000  0.000000  -0.000000)
(0.000000  0.000000  -0.000000)
(0.000000  0.000000  -0.000000)
(0.000000  0.000000  -0.000000)
(0.000000  0.000000  -0.000000)
(0.000000  0.000000  -0.000000)
(0.000000  0.000000  -0.000000)
(0.000000  0.000000  -0.000000)
(0.000000  0.000000  -0.000000)
(0.000000  0.000000  -0.000000)
(0.000000  0.000000  -0.000000)
(0.000000  0.000000  -0.000000)
(0.000000  0.000000  -0.000000)
(0.000000  0.000000  -0.000000)
(0.000000  0.000000  -0.000000)
(0.000000  0.000000  -0.000000)
(0.000000  0.000000  -0.000000)
(0.000000  0.000000  -0.000000)
(0.000000  0.000000  -0.000000)
(0.000000  0.000000  -0.000000)
(0.000000  0.000000  -0.000000)
(0.000000  0.000000  -0.000000)
(0.000000  0.000000  -0.000000)
(0.000000  0.000000  -0.000000)
(0.000000  0.000000  -0.000000)
(0.000000  0.000000  -0.000000)
(0.000000  0.000000  -0.000000)
(0.000000  0.000000  -0.000000)
(0.000000  0.000000  -0.000000)
(0.000000  0.000000  -0.000000)
(0.000000  0.000000  -0.000000)
(0.000000  0.000000  -0.000000)
(0.000000  0.000000  -0.000000)
(0.000000  0.000000  -0.000000)
(0.000000  0.000000  -0.000000)
(0.000000  0.000000  -0.000000)
(0.000000  0.000000  -0.000000)
(0.000000  0.000000  -0.000000)
(0.000000  0.000000  -0.000000)
(0.000000  0.000000  -0.000000)
(0.000000  0.000000  -0.000000)
(0.000000  0.000000  -0.000000)
(0.000000  0.000000  -0.000000)
(0.000000  0.000000  -0.000000)
(0.000000  0.000000  -0.000000)
(0.000000  0.000000  -0.000000)
(0.000000  0.000000  -0.000000)
(0.000000  0.000000  -0.000000)
(0.000000  0.000000  -0.000000)
(0.000000  0.000000  -0.000000)
(0.000000  0.000000  -0.000000)
(0.000000  0.000000  -0.000000)
(0.000000  0.000000  -0.000000)
(0.000000  0.000000  -0.000000)
(0.000000  0.000000  -0.000000)
(0.000000  0.000000  -0.000000)
(0.000000  0.000000  -0.000000)
(0.000000  0.000000  -0.000000)
(0.000000  0.000000  -0.000000)
(0.000000  0.000000  -0.000000)
(0.000000  0.000000  -0.000000)
(0.000000  0.000000  -0.000000)
(0.000000  0.000000  -0.000000)
(0.000000  0.000000  -0.000000)
(0.000000  0.000000  -0.000000)
(0.000000  0.000000  -0.000000)
(0.000000  0.000000  -0.000000)
(0.000000  0.000000  -0.000000)
(0.000000  0.000000  -0.000000)
(0.000000  0.000000  -0.000000)
(0.000000  0.000000  -0.000000)
(0.000000  0.000000  -0.000000)
(0.000000  0.000000  -0.000000)
(0.000000  0.000000  -0.000000)
(0.000000  0.000000  -0.000000)
(0.000000  0.000000  -0.000000)
(0.000000  0.000000  -0.000000)
(0.000000  0.000000  -0.000000)
(0.000000  0.000000  -0.000000)
(0.000000  0.000000  -0.000000)
(0.000000  0.000000  -0.000000)
(0.000000  0.000000  -0.000000)
(0.000000  0.000000  -0.000000)
(0.000000  0.000000  -0.000000)
(0.000000  0.000000  -0.000000)
(0.000000  0.000000  -0.000000)
(0.000000  0.000000  -0.000000)
(0.000000  0.000000  -0.000000)
(0.000000  0.000000  -0.000000)
(0.000000  0.000000  -0.000000)
(0.000000  0.000000  -0.000000)
(0.000000  0.000000  -0.000000)
(0.000000  0.000000  -0.000000)
(0.000000  0.000000  -0.000000)
(0.000000  0.000000  -0.000000)
(0.000000  0.000000  -0.000000)
(0.000000  0.000000  -0.000000)
(0.000000  0.000000  -0.000000)
(0.000000  0.000000  -0.000000)
(0.000000  0.000000  -0.000000)
(0.000000  0.000000  -0.000000)
(0.000000  0.000000  -0.000000)
(0.000000  0.000000  -0.000000)
(0.000000  0.000000  -0.000000)
(0.000000  0.000000  -0.000000)
(0.000000  0.000000  -0.000000)
(0.000000  0.000000  -0.000000)
(0.000000  0.000000  -0.000000)
(0.000000  0.000000  -0.000000)
(0.000000  0.000000  -0.000000)
(0.000000  0.000000  -0.000000)
(0.000000  0.000000  -0.000000)
(0.000000  0.000000  -0.000000)
(0.000000  0.000000  -0.000000)
(0.000000  0.000000  -0.000000)
(0.000000  0.000000  -0.000000)
(0.000000  0.000000  -0.000000)
(0.000000  0.000000  -0.000000)
(0.000000  0.000000  -0.000000)
(0.000000  0.000000  -0.000000)
(0.000000  0.000000  -0.000000)
(0.000000  0.000000  -0.000000)
(0.000000  0.000000  -0.000000)
(0.000000  0.000000  -0.000000)
(0.000000  0.000000  -0.000000)
(0.000000  0.000000  -0.000000)
(0.000000  0.000000  -0.000000)
(0.000000  0.000000  -0.000000)
(0.000000  0.000000  -0.000000)
(0.000000  0.000000  -0.000000)
(0.000000  0.000000  -0.000000)
(0.000000  0.000000  -0.000000)
(0.000000  0.000000  -0.000000)
(0.000000  0.000000  -0.000000)
(0.000000  0.000000  -0.000000)
(0.000000  0.000000  -0.000000)
(0.000000  0.000000  -0.000000)
(0.000000  0.000000  -0.000000)
(0.000000  0.000000  -0.000000)
(0.000000  0.000000  -0.000000)
(0.000000  0.000000  -0.000000)
(0.000000  0.000000  -0.000000)
(0.000000  0.000000  -0.000000)
(0.000000  0.000000  -0.000000)
(0.000000  0.000000  -0.000000)
(0.000000  0.000000  -0.000000)
(0.000000  0.000000  -0.000000)
(0.000000  0.000000  -0.000000)
(0.000000  0.000000  -0.000000)
(0.000000  0.000000  -0.000000)
(0.000000  0.000000  -0.000000)
(0.000000  0.000000  -0.000000)
(0.000000  0.000000  -0.000000)
(0.000000  0.000000  -0.000000)
(0.000000  0.000000  -0.000000)
(0.000000  0.000000  -0.000000)
(0.000000  0.000000  -0.000000)
(0.000000  0.000000  -0.000000)
(0.000000  0.000000  -0.000000)
(0.000000  0.000000  -0.000000)
(0.000000  0.000000  -0.000000)
(0.000000  0.000000  -0.000000)
(0.000000  0.000000  -0.000000)
(0.000000  0.000000  -0.000000)
(0.000000  0.000000  -0.000000)
(0.000000  0.000000  -0.000000)
(0.000000  0.000000  -0.000000)
(0.000000  0.000000  -0.000000)
(0.000000  0.000000  -0.000000)
(0.000000  0.000000  -0.000000)
(0.000000  0.000000  -0.000000)
(0.000000  0.000000  -0.000000)
(0.000000  0.000000  -0.000000)
(0.000000  0.000000  -0.000000)
(0.000000  0.000000  -0.000000)
(0.000000  0.000000  -0.000000)
(0.000000  0.000000  -0.000000)
(0.000000  0.000000  -0.000000)
(0.000000  0.000000  -0.000000)
(0.000000  0.000000  -0.000000)
(0.000000  0.000000  -0.000000)
(0.000000  0.000000  -0.000000)
(0.000000  0.000000  -0.000000)
(0.000000  0.000000  -0.000000)
(0.000000  0.000000  -0.000000)
(0.000000  0.000000  -0.000000)
(0.000000  0.000000  -0.000000)
(0.000000  0.000000  -0.000000)
(0.000000  0.000000  -0.000000)
(0.000000  0.000000  -0.000000)
(0.000000  0.000000  -0.000000)
(0.000000  0.000000  -0.000000)
(0.000000  0.000000  -0.000000)
(0.000000  0.000000  -0.000000)
(0.000000  0.000000  -0.000000)
(0.000000  0.000000  -0.000000)
(0.000000  0.000000  -0.000000)
(0.000000  0.000000  -0.000000)
(0.000000  0.000000  -0.000000)
(0.000000  0.000000  -0.000000)
(0.000001  0.000000  -0.000000)
(0.000001  0.000000  -0.000000)
(0.000001  0.000000  -0.000000)
(0.000001  0.000000  -0.000000)
(0.000001  0.000000  -0.000000)
(0.000001  0.000000  -0.000000)
(0.000001  0.000000  -0.000000)
(0.000001  0.000000  -0.000000)
(0.000001  0.000000  -0.000000)
(0.000001  0.000000  -0.000000)
(0.000001  0.000000  -0.000000)
(0.000001  0.000000  -0.000000)
(0.000001  0.000000  -0.000000)
(0.000001  0.000000  -0.000000)
(0.000002  0.000000  -0.000000)
(0.000002  0.000000  -0.000000)
(0.000002  0.000000  -0.000000)
(0.000002  0.000000  -0.000000)
(0.000002  0.000000  -0.000000)
(0.000002  0.000000  -0.000000)
(0.000003  0.000000  -0.000000)
(0.000003  0.000000  -0.000000)
(0.000003  0.000000  -0.000001)
(0.000003  0.000000  -0.000001)
(0.000004  0.000000  -0.000001)
(0.000004  0.000000  -0.000001)
(0.000004  0.000000  -0.000001)
(0.000005  0.000000  -0.000001)
(0.000005  0.000000  -0.000001)
(0.000005  0.000000  -0.000001)
(0.000006  0.000000  -0.000001)
(0.000006  0.000000  -0.000001)
(0.000007  0.000000  -0.000001)
(0.000008  0.000000  -0.000001)
(0.000008  0.000000  -0.000001)
(0.000009  0.000000  -0.000002)
(0.000010  0.000000  -0.000002)
(0.000010  0.000000  -0.000002)
(0.000011  0.000000  -0.000002)
(0.000012  0.000000  -0.000002)
(0.000013  0.000000  -0.000002)
(0.000014  0.000000  -0.000002)
(0.000016  0.000000  -0.000003)
(0.000017  0.000000  -0.000003)
(0.000018  0.000000  -0.000003)
(0.000020  0.000000  -0.000003)
(0.000022  0.000000  -0.000004)
(0.000024  0.000000  -0.000004)
(0.000026  0.000000  -0.000004)
(0.000028  0.000000  -0.000005)
(0.000030  0.000000  -0.000005)
(0.000033  0.000000  -0.000006)
(0.000035  0.000000  -0.000006)
(0.000038  0.000000  -0.000007)
(0.000042  0.000000  -0.000007)
(0.000045  0.000000  -0.000008)
(0.000049  0.000000  -0.000008)
(0.000053  0.000000  -0.000009)
(0.000058  0.000000  -0.000010)
(0.000063  0.000000  -0.000011)
(0.000068  0.000000  -0.000012)
(0.000074  0.000000  -0.000013)
(0.000080  0.000000  -0.000014)
(0.000087  0.000000  -0.000015)
(0.000094  0.000000  -0.000016)
(0.000102  0.000000  -0.000017)
(0.000111  0.000000  -0.000019)
(0.000120  0.000000  -0.000020)
(0.000131  0.000000  -0.000022)
(0.000142  0.000000  -0.000024)
(0.000154  0.000000  -0.000026)
(0.000167  0.000000  -0.000028)
(0.000181  0.000000  -0.000031)
(0.000196  0.000000  -0.000033)
(0.000213  0.000000  -0.000036)
(0.000231  0.000000  -0.000039)
(0.000250  0.000000  -0.000042)
(0.000272  0.000000  -0.000046)
(0.000295  0.000000  -0.000050)
(0.000319  0.000000  -0.000054)
(0.000346  0.000000  -0.000058)
(0.000375  0.000000  -0.000063)
(0.000407  0.000000  -0.000068)
(0.000441  0.000000  -0.000074)
(0.000478  0.000000  -0.000080)
(0.000518  0.000000  -0.000087)
(0.000562  0.000000  -0.000094)
(0.000609  0.000000  -0.000102)
(0.000659  0.000000  -0.000110)
[truncated: 4,405,377 more chars]
