# Supplementary material for: ISWFoam: A numerical model for internal solitary wave simulation in continuously stratified fluids
Source: Copernicus journal article supplement (doi:10.5194/gmd-2021-102), 2021-05-27
Supplement: Supplementary file 2 [file gmd-2021-102-supplement.zip › ISWFoam/tutorial/FlatBottom-DJLES/0.orig/U]

/*--------------------------------*- C++ -*----------------------------------*\
| =========                 |                                                 |
| \\      /  F ield         | OpenFOAM: The Open Source CFD Toolbox           |
|  \\    /   O peration     | Version:  plus                                  |
|   \\  /    A nd           | Web:      www.OpenFOAM.com                      |
|    \\/     M anipulation  |                                                 |
\*---------------------------------------------------------------------------*/
FoamFile
{
    version     2.0;
    format      ascii;
    class       volVectorField;
    location    "0";
    object      U;
}
// * * * * * * * * * * * * * * * * * * * * * * * * * * * * * * * * * * * * * //

dimensions      [0 1 -1 0 0 0 0];

//internalField   uniform (0 0 0);

#include "initialFieldsU";
internalField   nonuniform $velocityProfile;

boundaryField
{
    inlet
    {
        type            cyclic;
    }

    outlet
    {
        type            cyclic;
    }

    front
    {
	    type            empty;
    }
    back
    {
	    type            empty;
    }


    ground
    {
        type            noSlip;
        value           uniform (0 0 0);
    }
    top
    {
        type            noSlip;
	value           uniform (0 0 0);
    }
}
// ************************************************************************* //
