# Supplementary material for: ISWFoam: A numerical model for internal solitary wave simulation in continuously stratified fluids
Source: Copernicus journal article supplement (doi:10.5194/gmd-2021-102), 2021-05-27
Supplement: Supplementary file 2 [file gmd-2021-102-supplement.zip › ISWFoam/tutorial/FlatBottom-DJLES/Allclean]

#! /bin/bash

foamListTimes -rm
rm -rf VTK* log gaugesInterFace
rm -rf 0
rm -rf proce*
rm -rf postPro*
rm -rf slu*
