# Supplementary material for: ISWFoam: A numerical model for internal solitary wave simulation in continuously stratified fluids
Source: Copernicus journal article supplement (doi:10.5194/gmd-2021-102), 2021-05-27
Supplement: Supplementary file 2 [file gmd-2021-102-supplement.zip › ISWFoam/tutorial/FlatBottom-DJLES/Allrun]

#! /bin/bash

decomposePar
mpirun -n 48 ISWFoam -parallel &>log

reconstructPar -time 0,1,2,3,4,5,10,20,30,40,50,60
foamToVTK
./postSensDensity.py
