# Supplementary material for: ISWFoam: A numerical model for internal solitary wave simulation in continuously stratified fluids
Source: Copernicus journal article supplement (doi:10.5194/gmd-2021-102), 2021-05-27
Supplement: Supplementary file 2 [file gmd-2021-102-supplement.zip › ISWFoam/tutorial/FlatBottom-DJLES/Allrun.pre]

#! /bin/bash

blockMesh

cp -r 0.orig 0

#setUFields

#setRhoFields

foamToVTK -name VTK-0s
