# Supplementary material for: ISWFoam: A numerical model for internal solitary wave simulation in continuously stratified fluids
Source: Copernicus journal article supplement (doi:10.5194/gmd-2021-102), 2021-05-27
Supplement: Supplementary file 2 [file gmd-2021-102-supplement.zip › ISWFoam/tutorial/FlatBottom-DJLES/README.md]

### how to Simulate
* (1) blockMesh
* (2) cp -r 0.orig 0
* (3) setUFields
* (4) setRhoFields
* (5) foamToVTK -name VTK-0s
* (6) decomposePar
* (7) mpirun -n 36 ISWFoam -parallel &>log
* (8) reconstructPar -time 10,20,30,40,50
* (9) foamToVTK -name VTK-0s-50s
* (10) ./postSensDensity.py
