# Supplementary material for: ISWFoam: A numerical model for internal solitary wave simulation in continuously stratified fluids
Source: Copernicus journal article supplement (doi:10.5194/gmd-2021-102), 2021-05-27
Supplement: Supplementary file 2 [file gmd-2021-102-supplement.zip › ISWFoam/tutorial/FlatBottom-DJLES/system/controlDict]

/*--------------------------------*- C++ -*----------------------------------*\
| =========                 |                                                 |
| \\      /  F ield         | OpenFOAM: The Open Source CFD Toolbox           |
|  \\    /   O peration     | Version:  plus                                  |
|   \\  /    A nd           | Web:      www.OpenFOAM.com                      |
|    \\/     M anipulation  |                                                 |
\*---------------------------------------------------------------------------*/
FoamFile
{
    version     2.0;
    format      ascii;
    class       dictionary;
    location    "system";
    object      controlDict;
}
// * * * * * * * * * * * * * * * * * * * * * * * * * * * * * * * * * * * * * //
libs
(
    "libdensityTurbulenceModels.so"
);
application     ISWFoam;

startFrom       startTime;

startTime       0;

stopAt          endTime;

endTime         70;

deltaT          0.01;

writeControl    adjustableRunTime;

writeInterval   1;

purgeWrite      0;

writeFormat     ascii;

writePrecision  6;

writeCompression off;

timeFormat      general;

timePrecision   6;

runTimeModifiable yes;

adjustTimeStep  yes;

maxCo           0.85;
maxAlphaCo      0.85;

maxDeltaT       0.85;


functions
{
    sets
    {
        type            sets;
        libs            ("libsampling.so");
        enabled         true;
        writeControl    adjustableRunTime;
        writeInterval   0.05;

        interpolationScheme cellPoint;
        setFormat       raw;
        sets
        (
            GaugeVOF01
            {
                type    uniform;
                axis    xyz;
                start   (9.5001 0.01 0.0);
                end     (9.5001 0.01 0.5);
                nPoints 2000;
            }
            GaugeVOF02
            {
                type    uniform;
                axis    xyz;
                start   ( 8.4001 0.01 0.0 );
                end     ( 8.4001 0.01 0.5 );
                nPoints 2000;
            }
            GaugeVOF03
            {
                type    uniform;
                axis    xyz;
                start   ( 7.3001 0.01 0.0 );
                end     ( 7.3001 0.01 0.5 );
                nPoints 2000;
            }
            GaugeVOF04
            {
                type    uniform;
                axis    xyz;
                start   ( 6.2001 0.01 0.0 );
                end     ( 6.2001 0.01 0.5 );
                nPoints 2000;
            }
            GaugeVOF05
            {
                type    uniform;
                axis    xyz;
                start   (5.1001 0.01 0.0);
                end     (5.1001 0.01 0.5);
                nPoints 2000;
            }
            GaugeVOF06
            {
                type    uniform;
                axis    xyz;
                start   (2.51001 0.01 0.0);
                end     (2.51001 0.01 0.5);
                nPoints 2000;
            }
         );

        fixedLocations  false;
        fields
        (
            rho
        );
    }
}


// ************************************************************************* //
