# Supplementary material for: ISWFoam: A numerical model for internal solitary wave simulation in continuously stratified fluids
Source: Copernicus journal article supplement (doi:10.5194/gmd-2021-102), 2021-05-27
Supplement: Supplementary file 2 [file gmd-2021-102-supplement.zip › ISWFoam/tutorial/FlatBottom-DJLES/system/fvSolution]

/*--------------------------------*- C++ -*----------------------------------*\
| =========                 |                                                 |
| \\      /  F ield         | OpenFOAM: The Open Source CFD Toolbox           |
|  \\    /   O peration     | Version:  plus                                  |
|   \\  /    A nd           | Web:      www.OpenFOAM.com                      |
|    \\/     M anipulation  |                                                 |
\*---------------------------------------------------------------------------*/
FoamFile
{
    version     2.0;
    format      ascii;
    class       dictionary;
    location    "system";
    object      fvSolution;
}
// * * * * * * * * * * * * * * * * * * * * * * * * * * * * * * * * * * * * * //

solvers
{
    "pcorr.*"
    {
        solver          PCG;
        preconditioner  DIC;
        tolerance       1e-6;
        relTol          0;
    }
    p_rgh
    {
        solver          PCG;
        preconditioner  DIC;
        tolerance       1e-6;
        relTol          0.1;
    }

    p_rghFinal
    {
        solver          GAMG;
        smoother        DIC;
        tolerance       1e-7;
        relTol          0;
    }

    "(U|k|omega|epsilon).*"
    {
        solver          smoothSolver;
        smoother        symGaussSeidel;
        tolerance       1e-08;
        relTol          0;
    }
    rho
    {
        solver          smoothSolver;
        smoother        symGaussSeidel;
        tolerance       1e-08;
        relTol          0;
    }
    rhoFinal
    {
        solver          smoothSolver;
        smoother        symGaussSeidel;
        tolerance       1e-08;
        relTol          0;
    }

}

PIMPLE
{
    momentumPredictor   no;
    nOuterCorrectors    1;
    nCorrectors         3;
    nNonOrthogonalCorrectors 0;
    pRefCell        0;
    pRefValue       0;
    ddtCorr                     yes;
    correctPhi                 no;
    massFluxInterpolation      no;

    moveMeshOuterCorrectors no;
    turbOnFinalIterOnly no;

    oversetAdjustPhi    no;

    moveMeshOuterCorrectors no;
    turbOnFinalIterOnly no;

}
relaxationFactors
{
    fields
    {
    }
    equations
    {
            ".*" 1;
    }
}

cache
{
        grad(U);
}

// ************************************************************************* //
